# Supplementary material for: The genotype of barley cultivars influences multiple aspects of their associated microbiota via differential root exudate secretion
Source: PLoS Biol. 2024 Apr 25;22(4):e3002232. doi: 10.1371/journal.pbio.3002232 (PMC11045101; doi:10.1371/journal.pbio.3002232)
Supplement: S1 Data — (XLSX) [file pbio.3002232.s016.xlsx]

## Sheet: A
	OTU	Sample	Abundance	X.SampleID	X.SampleIDNovogene	BarcodeSequence	LinkerPrimerSequence	Date	Cultivar	Material	used_name	Rep	Read_number	low_read	Type	Experiment	Kingdom	Phylum	Class	Order	Family	Genus
400	SV3	Che_Roots_5	0.161402	Che_Roots_5	FKDN202654757-1A	NA	NA	nov_2020	Chevallier	roots	NA	4	153857	NA	ITS1-1F†	X201SC20123127-Z01-F001	Bacteria	Proteobacteria	Gammaproteobacteria	Betaproteobacteriales	Burkholderiaceae	Massilia
395	SV3	Che_Roots_3	0.136627	Che_Roots_3	FKDN202654755-1A	NA	NA	nov_2020	Chevallier	roots	NA	2	153822	NA	ITS1-1F†	X201SC20123127-Z01-F001	Bacteria	Proteobacteria	Gammaproteobacteria	Betaproteobacteriales	Burkholderiaceae	Massilia
604	SV5	Che_Roots_3	0.0927367	Che_Roots_3	FKDN202654755-1A	NA	NA	nov_2020	Chevallier	roots	NA	2	153822	NA	ITS1-1F†	X201SC20123127-Z01-F001	Bacteria	Proteobacteria	Gammaproteobacteria	Enterobacteriales	Enterobacteriaceae	Klebsiella
245	SV21	Che_Roots_3	0.0645596	Che_Roots_3	FKDN202654755-1A	NA	NA	nov_2020	Chevallier	roots	NA	2	153822	NA	ITS1-1F†	X201SC20123127-Z01-F001	Bacteria	Proteobacteria	Gammaproteobacteria	Betaproteobacteriales	Burkholderiaceae	Burkholderia-Caballeronia-Paraburkholderia
386	SV3	Che_Rhiz_5	0.063678	Che_Rhiz_5	FKDN202654752-1A	NA	NA	nov_2020	Chevallier	rhizosphere	NA	4	142946	NA	ITS1-1F†	X201SC20123127-Z01-F001	Bacteria	Proteobacteria	Gammaproteobacteria	Betaproteobacteriales	Burkholderiaceae	Massilia
468	SV4	Che_Roots_5	0.0619005	Che_Roots_5	FKDN202654757-1A	NA	NA	nov_2020	Chevallier	roots	NA	4	153857	NA	ITS1-1F†	X201SC20123127-Z01-F001	Bacteria	Proteobacteria	Gammaproteobacteria	Pseudomonadales	Pseudomonadaceae	Pseudomonas
392	SV3	Che_Roots_2	0.0597086	Che_Roots_2	FKDN202654754-1A	NA	NA	nov_2020	Chevallier	roots	NA	1	169149	NA	ITS1-1F†	X201SC20123127-Z01-F001	Bacteria	Proteobacteria	Gammaproteobacteria	Betaproteobacteriales	Burkholderiaceae	Massilia
390	SV3	Che_Rhiz_6	0.0590022	Che_Rhiz_6	FKDN202654753-1A	NA	NA	nov_2020	Chevallier	rhizosphere	NA	5	152328	NA	ITS1-1F†	X201SC20123127-Z01-F001	Bacteria	Proteobacteria	Gammaproteobacteria	Betaproteobacteriales	Burkholderiaceae	Massilia
391	SV3	Che_Roots_6	0.0581406	Che_Roots_6	FKDN202654758-1A	NA	NA	nov_2020	Chevallier	roots	NA	5	159052	NA	ITS1-1F†	X201SC20123127-Z01-F001	Bacteria	Proteobacteria	Gammaproteobacteria	Betaproteobacteriales	Burkholderiaceae	Massilia
393	SV3	Che_Rhiz_3	0.0537719	Che_Rhiz_3	FKDN202654750-1A	NA	NA	nov_2020	Chevallier	rhizosphere	NA	2	148574	NA	ITS1-1F†	X201SC20123127-Z01-F001	Bacteria	Proteobacteria	Gammaproteobacteria	Betaproteobacteriales	Burkholderiaceae	Massilia
396	SV3	Che_Rhiz_4	0.0448804	Che_Rhiz_4	FKDN202654751-1A	NA	NA	nov_2020	Chevallier	rhizosphere	NA	3	143428	NA	ITS1-1F†	X201SC20123127-Z01-F001	Bacteria	Proteobacteria	Gammaproteobacteria	Betaproteobacteriales	Burkholderiaceae	Massilia
401	SV30	Che_Rhiz_2	0.044599	Che_Rhiz_2	FKDN202654749-1A	NA	NA	nov_2020	Chevallier	rhizosphere	NA	1	157371	NA	ITS1-1F†	X201SC20123127-Z01-F001	Bacteria	Actinobacteria	Actinobacteria	Frankiales	Acidothermaceae	Acidothermus
231	SV21	Che_Rhiz_3	0.0434144	Che_Rhiz_3	FKDN202654750-1A	NA	NA	nov_2020	Chevallier	rhizosphere	NA	2	148574	NA	ITS1-1F†	X201SC20123127-Z01-F001	Bacteria	Proteobacteria	Gammaproteobacteria	Betaproteobacteriales	Burkholderiaceae	Burkholderia-Caballeronia-Paraburkholderia
726	SV9	Che_Rhiz_2	0.0427089	Che_Rhiz_2	FKDN202654749-1A	NA	NA	nov_2020	Chevallier	rhizosphere	NA	1	157371	NA	ITS1-1F†	X201SC20123127-Z01-F001	Bacteria	Proteobacteria	Gammaproteobacteria	Xanthomonadales	Rhodanobacteraceae	Rhodanobacter
474	SV4	Che_Roots_3	0.0421935	Che_Roots_3	FKDN202654755-1A	NA	NA	nov_2020	Chevallier	roots	NA	2	153822	NA	ITS1-1F†	X201SC20123127-Z01-F001	Bacteria	Proteobacteria	Gammaproteobacteria	Pseudomonadales	Pseudomonadaceae	Pseudomonas
452	SV4	Che_Rhiz_4	0.0414603	Che_Rhiz_4	FKDN202654751-1A	NA	NA	nov_2020	Chevallier	rhizosphere	NA	3	143428	NA	ITS1-1F†	X201SC20123127-Z01-F001	Bacteria	Proteobacteria	Gammaproteobacteria	Pseudomonadales	Pseudomonadaceae	Pseudomonas
15	SV10	Che_Roots_5	0.0406534	Che_Roots_5	FKDN202654757-1A	NA	NA	nov_2020	Chevallier	roots	NA	4	153857	NA	ITS1-1F†	X201SC20123127-Z01-F001	Bacteria	Proteobacteria	Alphaproteobacteria	Rhizobiales	Rhizobiaceae	Allorhizobium-Neorhizobium-Pararhizobium-Rhizobium
233	SV21	Che_Roots_6	0.0397115	Che_Roots_6	FKDN202654758-1A	NA	NA	nov_2020	Chevallier	roots	NA	5	159052	NA	ITS1-1F†	X201SC20123127-Z01-F001	Bacteria	Proteobacteria	Gammaproteobacteria	Betaproteobacteriales	Burkholderiaceae	Burkholderia-Caballeronia-Paraburkholderia
414	SV30	Che_Rhiz_3	0.038845	Che_Rhiz_3	FKDN202654750-1A	NA	NA	nov_2020	Chevallier	rhizosphere	NA	2	148574	NA	ITS1-1F†	X201SC20123127-Z01-F001	Bacteria	Actinobacteria	Actinobacteria	Frankiales	Acidothermaceae	Acidothermus
237	SV21	Che_Rhiz_6	0.038279	Che_Rhiz_6	FKDN202654753-1A	NA	NA	nov_2020	Chevallier	rhizosphere	NA	5	152328	NA	ITS1-1F†	X201SC20123127-Z01-F001	Bacteria	Proteobacteria	Gammaproteobacteria	Betaproteobacteriales	Burkholderiaceae	Burkholderia-Caballeronia-Paraburkholderia
229	SV21	Che_Rhiz_4	0.0380311	Che_Rhiz_4	FKDN202654751-1A	NA	NA	nov_2020	Chevallier	rhizosphere	NA	3	143428	NA	ITS1-1F†	X201SC20123127-Z01-F001	Bacteria	Proteobacteria	Gammaproteobacteria	Betaproteobacteriales	Burkholderiaceae	Burkholderia-Caballeronia-Paraburkholderia
464	SV4	Che_Roots_4	0.0371441	Che_Roots_4	FKDN202654756-1A	NA	NA	nov_2020	Chevallier	roots	NA	3	168529	NA	ITS1-1F†	X201SC20123127-Z01-F001	Bacteria	Proteobacteria	Gammaproteobacteria	Pseudomonadales	Pseudomonadaceae	Pseudomonas
416	SV30	Che_Rhiz_6	0.0358357	Che_Rhiz_6	FKDN202654753-1A	NA	NA	nov_2020	Chevallier	rhizosphere	NA	5	152328	NA	ITS1-1F†	X201SC20123127-Z01-F001	Bacteria	Actinobacteria	Actinobacteria	Frankiales	Acidothermaceae	Acidothermus
385	SV3	Che_Roots_4	0.0349827	Che_Roots_4	FKDN202654756-1A	NA	NA	nov_2020	Chevallier	roots	NA	3	168529	NA	ITS1-1F†	X201SC20123127-Z01-F001	Bacteria	Proteobacteria	Gammaproteobacteria	Betaproteobacteriales	Burkholderiaceae	Massilia
454	SV4	Che_Rhiz_6	0.0346492	Che_Rhiz_6	FKDN202654753-1A	NA	NA	nov_2020	Chevallier	rhizosphere	NA	5	152328	NA	ITS1-1F†	X201SC20123127-Z01-F001	Bacteria	Proteobacteria	Gammaproteobacteria	Pseudomonadales	Pseudomonadaceae	Pseudomonas
731	SV9	Che_Rhiz_5	0.0343516	Che_Rhiz_5	FKDN202654752-1A	NA	NA	nov_2020	Chevallier	rhizosphere	NA	4	142946	NA	ITS1-1F†	X201SC20123127-Z01-F001	Bacteria	Proteobacteria	Gammaproteobacteria	Xanthomonadales	Rhodanobacteraceae	Rhodanobacter
238	SV21	Che_Roots_5	0.033938	Che_Roots_5	FKDN202654757-1A	NA	NA	nov_2020	Chevallier	roots	NA	4	153857	NA	ITS1-1F†	X201SC20123127-Z01-F001	Bacteria	Proteobacteria	Gammaproteobacteria	Betaproteobacteriales	Burkholderiaceae	Burkholderia-Caballeronia-Paraburkholderia
226	SV21	Che_Rhiz_5	0.0332755	Che_Rhiz_5	FKDN202654752-1A	NA	NA	nov_2020	Chevallier	rhizosphere	NA	4	142946	NA	ITS1-1F†	X201SC20123127-Z01-F001	Bacteria	Proteobacteria	Gammaproteobacteria	Betaproteobacteriales	Burkholderiaceae	Burkholderia-Caballeronia-Paraburkholderia
609	SV5	Che_Rhiz_3	0.0331862	Che_Rhiz_3	FKDN202654750-1A	NA	NA	nov_2020	Chevallier	rhizosphere	NA	2	148574	NA	ITS1-1F†	X201SC20123127-Z01-F001	Bacteria	Proteobacteria	Gammaproteobacteria	Enterobacteriales	Enterobacteriaceae	Klebsiella
406	SV30	Che_Rhiz_5	0.0322099	Che_Rhiz_5	FKDN202654752-1A	NA	NA	nov_2020	Chevallier	rhizosphere	NA	4	142946	NA	ITS1-1F†	X201SC20123127-Z01-F001	Bacteria	Actinobacteria	Actinobacteria	Frankiales	Acidothermaceae	Acidothermus
741	SV9	Che_Rhiz_6	0.0309892	Che_Rhiz_6	FKDN202654753-1A	NA	NA	nov_2020	Chevallier	rhizosphere	NA	5	152328	NA	ITS1-1F†	X201SC20123127-Z01-F001	Bacteria	Proteobacteria	Gammaproteobacteria	Xanthomonadales	Rhodanobacteraceae	Rhodanobacter
433	SV37	Che_Rhiz_2	0.0308569	Che_Rhiz_2	FKDN202654749-1A	NA	NA	nov_2020	Chevallier	rhizosphere	NA	1	157371	NA	ITS1-1F†	X201SC20123127-Z01-F001	Bacteria	Actinobacteria	Thermoleophilia	Solirubrobacterales	Solirubrobacteraceae	Conexibacter
457	SV4	Che_Rhiz_3	0.03062	Che_Rhiz_3	FKDN202654750-1A	NA	NA	nov_2020	Chevallier	rhizosphere	NA	2	148574	NA	ITS1-1F†	X201SC20123127-Z01-F001	Bacteria	Proteobacteria	Gammaproteobacteria	Pseudomonadales	Pseudomonadaceae	Pseudomonas
408	SV30	Che_Rhiz_4	0.0303337	Che_Rhiz_4	FKDN202654751-1A	NA	NA	nov_2020	Chevallier	rhizosphere	NA	3	143428	NA	ITS1-1F†	X201SC20123127-Z01-F001	Bacteria	Actinobacteria	Actinobacteria	Frankiales	Acidothermaceae	Acidothermus
451	SV4	Che_Rhiz_5	0.0296711	Che_Rhiz_5	FKDN202654752-1A	NA	NA	nov_2020	Chevallier	rhizosphere	NA	4	142946	NA	ITS1-1F†	X201SC20123127-Z01-F001	Bacteria	Proteobacteria	Gammaproteobacteria	Pseudomonadales	Pseudomonadaceae	Pseudomonas
289	SV23	Che_Roots_5	0.0290725	Che_Roots_5	FKDN202654757-1A	NA	NA	nov_2020	Chevallier	roots	NA	4	153857	NA	ITS1-1F†	X201SC20123127-Z01-F001	Bacteria	Proteobacteria	Alphaproteobacteria	Caulobacterales	Caulobacteraceae	Asticcacaulis
733	SV9	Che_Rhiz_4	0.0288106	Che_Rhiz_4	FKDN202654751-1A	NA	NA	nov_2020	Chevallier	rhizosphere	NA	3	143428	NA	ITS1-1F†	X201SC20123127-Z01-F001	Bacteria	Proteobacteria	Gammaproteobacteria	Xanthomonadales	Rhodanobacteraceae	Rhodanobacter
701	SV8	Che_Rhiz_6	0.0285358	Che_Rhiz_6	FKDN202654753-1A	NA	NA	nov_2020	Chevallier	rhizosphere	NA	5	152328	NA	ITS1-1F†	X201SC20123127-Z01-F001	Bacteria	Proteobacteria	Alphaproteobacteria	Rhizobiales	Xanthobacteraceae	Pseudolabrys
249	SV21	Che_Roots_2	0.0282537	Che_Roots_2	FKDN202654754-1A	NA	NA	nov_2020	Chevallier	roots	NA	1	169149	NA	ITS1-1F†	X201SC20123127-Z01-F001	Bacteria	Proteobacteria	Gammaproteobacteria	Betaproteobacteriales	Burkholderiaceae	Burkholderia-Caballeronia-Paraburkholderia
291	SV23	Che_Roots_3	0.028117	Che_Roots_3	FKDN202654755-1A	NA	NA	nov_2020	Chevallier	roots	NA	2	153822	NA	ITS1-1F†	X201SC20123127-Z01-F001	Bacteria	Proteobacteria	Alphaproteobacteria	Caulobacterales	Caulobacteraceae	Asticcacaulis
739	SV9	Che_Rhiz_3	0.0277952	Che_Rhiz_3	FKDN202654750-1A	NA	NA	nov_2020	Chevallier	rhizosphere	NA	2	148574	NA	ITS1-1F†	X201SC20123127-Z01-F001	Bacteria	Proteobacteria	Gammaproteobacteria	Xanthomonadales	Rhodanobacteraceae	Rhodanobacter
603	SV5	Che_Roots_4	0.0277336	Che_Roots_4	FKDN202654756-1A	NA	NA	nov_2020	Chevallier	roots	NA	3	168529	NA	ITS1-1F†	X201SC20123127-Z01-F001	Bacteria	Proteobacteria	Gammaproteobacteria	Enterobacteriales	Enterobacteriaceae	Klebsiella
418	SV30	Che_Roots_3	0.0274673	Che_Roots_3	FKDN202654755-1A	NA	NA	nov_2020	Chevallier	roots	NA	2	153822	NA	ITS1-1F†	X201SC20123127-Z01-F001	Bacteria	Actinobacteria	Actinobacteria	Frankiales	Acidothermaceae	Acidothermus
7	SV10	Che_Roots_3	0.0267815	Che_Roots_3	FKDN202654755-1A	NA	NA	nov_2020	Chevallier	roots	NA	2	153822	NA	ITS1-1F†	X201SC20123127-Z01-F001	Bacteria	Proteobacteria	Alphaproteobacteria	Rhizobiales	Rhizobiaceae	Allorhizobium-Neorhizobium-Pararhizobium-Rhizobium
278	SV23	Che_Rhiz_3	0.0259859	Che_Rhiz_3	FKDN202654750-1A	NA	NA	nov_2020	Chevallier	rhizosphere	NA	2	148574	NA	ITS1-1F†	X201SC20123127-Z01-F001	Bacteria	Proteobacteria	Alphaproteobacteria	Caulobacterales	Caulobacteraceae	Asticcacaulis
704	SV8	Che_Rhiz_5	0.0259204	Che_Rhiz_5	FKDN202654752-1A	NA	NA	nov_2020	Chevallier	rhizosphere	NA	4	142946	NA	ITS1-1F†	X201SC20123127-Z01-F001	Bacteria	Proteobacteria	Alphaproteobacteria	Rhizobiales	Xanthobacteraceae	Pseudolabrys
703	SV8	Che_Rhiz_2	0.0258542	Che_Rhiz_2	FKDN202654749-1A	NA	NA	nov_2020	Chevallier	rhizosphere	NA	1	157371	NA	ITS1-1F†	X201SC20123127-Z01-F001	Bacteria	Proteobacteria	Alphaproteobacteria	Rhizobiales	Xanthobacteraceae	Pseudolabrys
426	SV37	Che_Rhiz_6	0.0257405	Che_Rhiz_6	FKDN202654753-1A	NA	NA	nov_2020	Chevallier	rhizosphere	NA	5	152328	NA	ITS1-1F†	X201SC20123127-Z01-F001	Bacteria	Actinobacteria	Thermoleophilia	Solirubrobacterales	Solirubrobacteraceae	Conexibacter
430	SV37	Che_Rhiz_5	0.0256383	Che_Rhiz_5	FKDN202654752-1A	NA	NA	nov_2020	Chevallier	rhizosphere	NA	4	142946	NA	ITS1-1F†	X201SC20123127-Z01-F001	Bacteria	Actinobacteria	Thermoleophilia	Solirubrobacterales	Solirubrobacteraceae	Conexibacter
702	SV8	Che_Rhiz_4	0.0254544	Che_Rhiz_4	FKDN202654751-1A	NA	NA	nov_2020	Chevallier	rhizosphere	NA	3	143428	NA	ITS1-1F†	X201SC20123127-Z01-F001	Bacteria	Proteobacteria	Alphaproteobacteria	Rhizobiales	Xanthobacteraceae	Pseudolabrys
376	SV3	Che_Rhiz_2	0.0252213	Che_Rhiz_2	FKDN202654749-1A	NA	NA	nov_2020	Chevallier	rhizosphere	NA	1	157371	NA	ITS1-1F†	X201SC20123127-Z01-F001	Bacteria	Proteobacteria	Gammaproteobacteria	Betaproteobacteriales	Burkholderiaceae	Massilia
288	SV23	Che_Roots_6	0.0250898	Che_Roots_6	FKDN202654758-1A	NA	NA	nov_2020	Chevallier	roots	NA	5	159052	NA	ITS1-1F†	X201SC20123127-Z01-F001	Bacteria	Proteobacteria	Alphaproteobacteria	Caulobacterales	Caulobacteraceae	Asticcacaulis
227	SV21	Che_Rhiz_2	0.0248138	Che_Rhiz_2	FKDN202654749-1A	NA	NA	nov_2020	Chevallier	rhizosphere	NA	1	157371	NA	ITS1-1F†	X201SC20123127-Z01-F001	Bacteria	Proteobacteria	Gammaproteobacteria	Betaproteobacteriales	Burkholderiaceae	Burkholderia-Caballeronia-Paraburkholderia
402	SV30	Che_Roots_6	0.0247156	Che_Roots_6	FKDN202654758-1A	NA	NA	nov_2020	Chevallier	roots	NA	5	159052	NA	ITS1-1F†	X201SC20123127-Z01-F001	Bacteria	Actinobacteria	Actinobacteria	Frankiales	Acidothermaceae	Acidothermus
727	SV9	Che_Roots_6	0.0243227	Che_Roots_6	FKDN202654758-1A	NA	NA	nov_2020	Chevallier	roots	NA	5	159052	NA	ITS1-1F†	X201SC20123127-Z01-F001	Bacteria	Proteobacteria	Gammaproteobacteria	Xanthomonadales	Rhodanobacteraceae	Rhodanobacter
732	SV9	Che_Roots_5	0.0242625	Che_Roots_5	FKDN202654757-1A	NA	NA	nov_2020	Chevallier	roots	NA	4	153857	NA	ITS1-1F†	X201SC20123127-Z01-F001	Bacteria	Proteobacteria	Gammaproteobacteria	Xanthomonadales	Rhodanobacteraceae	Rhodanobacter
686	SV7	Che_Roots_5	0.024244	Che_Roots_5	FKDN202654757-1A	NA	NA	nov_2020	Chevallier	roots	NA	4	153857	NA	ITS1-1F†	X201SC20123127-Z01-F001	Bacteria	Proteobacteria	Alphaproteobacteria	Rhizobiales	Devosiaceae	Devosia
471	SV4	Che_Roots_2	0.0241943	Che_Roots_2	FKDN202654754-1A	NA	NA	nov_2020	Chevallier	roots	NA	1	169149	NA	ITS1-1F†	X201SC20123127-Z01-F001	Bacteria	Proteobacteria	Gammaproteobacteria	Pseudomonadales	Pseudomonadaceae	Pseudomonas
283	SV23	Che_Rhiz_6	0.0241921	Che_Rhiz_6	FKDN202654753-1A	NA	NA	nov_2020	Chevallier	rhizosphere	NA	5	152328	NA	ITS1-1F†	X201SC20123127-Z01-F001	Bacteria	Proteobacteria	Alphaproteobacteria	Caulobacterales	Caulobacteraceae	Asticcacaulis
694	SV7	Che_Rhiz_6	0.0241016	Che_Rhiz_6	FKDN202654753-1A	NA	NA	nov_2020	Chevallier	rhizosphere	NA	5	152328	NA	ITS1-1F†	X201SC20123127-Z01-F001	Bacteria	Proteobacteria	Alphaproteobacteria	Rhizobiales	Devosiaceae	Devosia
19	SV10	Che_Roots_6	0.0239579	Che_Roots_6	FKDN202654758-1A	NA	NA	nov_2020	Chevallier	roots	NA	5	159052	NA	ITS1-1F†	X201SC20123127-Z01-F001	Bacteria	Proteobacteria	Alphaproteobacteria	Rhizobiales	Rhizobiaceae	Allorhizobium-Neorhizobium-Pararhizobium-Rhizobium
475	SV4	Che_Roots_6	0.0239485	Che_Roots_6	FKDN202654758-1A	NA	NA	nov_2020	Chevallier	roots	NA	5	159052	NA	ITS1-1F†	X201SC20123127-Z01-F001	Bacteria	Proteobacteria	Gammaproteobacteria	Pseudomonadales	Pseudomonadaceae	Pseudomonas
428	SV37	Che_Rhiz_3	0.0236042	Che_Rhiz_3	FKDN202654750-1A	NA	NA	nov_2020	Chevallier	rhizosphere	NA	2	148574	NA	ITS1-1F†	X201SC20123127-Z01-F001	Bacteria	Actinobacteria	Thermoleophilia	Solirubrobacterales	Solirubrobacteraceae	Conexibacter
688	SV7	Che_Rhiz_3	0.0235304	Che_Rhiz_3	FKDN202654750-1A	NA	NA	nov_2020	Chevallier	rhizosphere	NA	2	148574	NA	ITS1-1F†	X201SC20123127-Z01-F001	Bacteria	Proteobacteria	Alphaproteobacteria	Rhizobiales	Devosiaceae	Devosia
676	SV7	Che_Rhiz_2	0.0233312	Che_Rhiz_2	FKDN202654749-1A	NA	NA	nov_2020	Chevallier	rhizosphere	NA	1	157371	NA	ITS1-1F†	X201SC20123127-Z01-F001	Bacteria	Proteobacteria	Alphaproteobacteria	Rhizobiales	Devosiaceae	Devosia
706	SV8	Che_Rhiz_3	0.023115	Che_Rhiz_3	FKDN202654750-1A	NA	NA	nov_2020	Chevallier	rhizosphere	NA	2	148574	NA	ITS1-1F†	X201SC20123127-Z01-F001	Bacteria	Proteobacteria	Alphaproteobacteria	Rhizobiales	Xanthobacteraceae	Pseudolabrys
3	SV10	Che_Rhiz_3	0.0228196	Che_Rhiz_3	FKDN202654750-1A	NA	NA	nov_2020	Chevallier	rhizosphere	NA	2	148574	NA	ITS1-1F†	X201SC20123127-Z01-F001	Bacteria	Proteobacteria	Alphaproteobacteria	Rhizobiales	Rhizobiaceae	Allorhizobium-Neorhizobium-Pararhizobium-Rhizobium
677	SV7	Che_Rhiz_5	0.0227862	Che_Rhiz_5	FKDN202654752-1A	NA	NA	nov_2020	Chevallier	rhizosphere	NA	4	142946	NA	ITS1-1F†	X201SC20123127-Z01-F001	Bacteria	Proteobacteria	Alphaproteobacteria	Rhizobiales	Devosiaceae	Devosia
602	SV5	Che_Roots_5	0.0227271	Che_Roots_5	FKDN202654757-1A	NA	NA	nov_2020	Chevallier	roots	NA	4	153857	NA	ITS1-1F†	X201SC20123127-Z01-F001	Bacteria	Proteobacteria	Gammaproteobacteria	Enterobacteriales	Enterobacteriaceae	Klebsiella
1	SV10	Che_Rhiz_6	0.022714	Che_Rhiz_6	FKDN202654753-1A	NA	NA	nov_2020	Chevallier	rhizosphere	NA	5	152328	NA	ITS1-1F†	X201SC20123127-Z01-F001	Bacteria	Proteobacteria	Alphaproteobacteria	Rhizobiales	Rhizobiaceae	Allorhizobium-Neorhizobium-Pararhizobium-Rhizobium
277	SV23	Che_Rhiz_4	0.0226272	Che_Rhiz_4	FKDN202654751-1A	NA	NA	nov_2020	Chevallier	rhizosphere	NA	3	143428	NA	ITS1-1F†	X201SC20123127-Z01-F001	Bacteria	Proteobacteria	Alphaproteobacteria	Caulobacterales	Caulobacteraceae	Asticcacaulis
431	SV37	Che_Rhiz_4	0.022162	Che_Rhiz_4	FKDN202654751-1A	NA	NA	nov_2020	Chevallier	rhizosphere	NA	3	143428	NA	ITS1-1F†	X201SC20123127-Z01-F001	Bacteria	Actinobacteria	Thermoleophilia	Solirubrobacterales	Solirubrobacteraceae	Conexibacter
279	SV23	Che_Rhiz_5	0.0221489	Che_Rhiz_5	FKDN202654752-1A	NA	NA	nov_2020	Chevallier	rhizosphere	NA	4	142946	NA	ITS1-1F†	X201SC20123127-Z01-F001	Bacteria	Proteobacteria	Alphaproteobacteria	Caulobacterales	Caulobacteraceae	Asticcacaulis
407	SV30	Che_Roots_5	0.0217743	Che_Roots_5	FKDN202654757-1A	NA	NA	nov_2020	Chevallier	roots	NA	4	153857	NA	ITS1-1F†	X201SC20123127-Z01-F001	Bacteria	Actinobacteria	Actinobacteria	Frankiales	Acidothermaceae	Acidothermus
533	SV47	Che_Roots_6	0.021722	Che_Roots_6	FKDN202654758-1A	NA	NA	nov_2020	Chevallier	roots	NA	5	159052	NA	ITS1-1F†	X201SC20123127-Z01-F001	Bacteria	Actinobacteria	Actinobacteria	Streptomycetales	Streptomycetaceae	Streptomyces
5	SV10	Che_Rhiz_5	0.021522	Che_Rhiz_5	FKDN202654752-1A	NA	NA	nov_2020	Chevallier	rhizosphere	NA	4	142946	NA	ITS1-1F†	X201SC20123127-Z01-F001	Bacteria	Proteobacteria	Alphaproteobacteria	Rhizobiales	Rhizobiaceae	Allorhizobium-Neorhizobium-Pararhizobium-Rhizobium
276	SV23	Che_Rhiz_2	0.0215018	Che_Rhiz_2	FKDN202654749-1A	NA	NA	nov_2020	Chevallier	rhizosphere	NA	1	157371	NA	ITS1-1F†	X201SC20123127-Z01-F001	Bacteria	Proteobacteria	Alphaproteobacteria	Caulobacterales	Caulobacteraceae	Asticcacaulis
6	SV10	Che_Rhiz_4	0.0213777	Che_Rhiz_4	FKDN202654751-1A	NA	NA	nov_2020	Chevallier	rhizosphere	NA	3	143428	NA	ITS1-1F†	X201SC20123127-Z01-F001	Bacteria	Proteobacteria	Alphaproteobacteria	Rhizobiales	Rhizobiaceae	Allorhizobium-Neorhizobium-Pararhizobium-Rhizobium
682	SV7	Che_Rhiz_4	0.0210129	Che_Rhiz_4	FKDN202654751-1A	NA	NA	nov_2020	Chevallier	rhizosphere	NA	3	143428	NA	ITS1-1F†	X201SC20123127-Z01-F001	Bacteria	Proteobacteria	Alphaproteobacteria	Rhizobiales	Devosiaceae	Devosia
681	SV7	Che_Roots_6	0.0205714	Che_Roots_6	FKDN202654758-1A	NA	NA	nov_2020	Chevallier	roots	NA	5	159052	NA	ITS1-1F†	X201SC20123127-Z01-F001	Bacteria	Proteobacteria	Alphaproteobacteria	Rhizobiales	Devosiaceae	Devosia
8	SV10	Che_Rhiz_2	0.0201146	Che_Rhiz_2	FKDN202654749-1A	NA	NA	nov_2020	Chevallier	rhizosphere	NA	1	157371	NA	ITS1-1F†	X201SC20123127-Z01-F001	Bacteria	Proteobacteria	Alphaproteobacteria	Rhizobiales	Rhizobiaceae	Allorhizobium-Neorhizobium-Pararhizobium-Rhizobium
453	SV4	Che_Rhiz_2	0.0200799	Che_Rhiz_2	FKDN202654749-1A	NA	NA	nov_2020	Chevallier	rhizosphere	NA	1	157371	NA	ITS1-1F†	X201SC20123127-Z01-F001	Bacteria	Proteobacteria	Gammaproteobacteria	Pseudomonadales	Pseudomonadaceae	Pseudomonas
239	SV21	Che_Roots_4	0.0200041	Che_Roots_4	FKDN202654756-1A	NA	NA	nov_2020	Chevallier	roots	NA	3	168529	NA	ITS1-1F†	X201SC20123127-Z01-F001	Bacteria	Proteobacteria	Gammaproteobacteria	Betaproteobacteriales	Burkholderiaceae	Burkholderia-Caballeronia-Paraburkholderia
656	SV6	Che_Roots_3	0.0198756	Che_Roots_3	FKDN202654755-1A	NA	NA	nov_2020	Chevallier	roots	NA	2	153822	NA	ITS1-1F†	X201SC20123127-Z01-F001	Bacteria	Actinobacteria	Actinobacteria	Micrococcales	Micrococcaceae	Pseudarthrobacter
297	SV23	Che_Roots_2	0.0197328	Che_Roots_2	FKDN202654754-1A	NA	NA	nov_2020	Chevallier	roots	NA	1	169149	NA	ITS1-1F†	X201SC20123127-Z01-F001	Bacteria	Proteobacteria	Alphaproteobacteria	Caulobacterales	Caulobacteraceae	Asticcacaulis
107	SV12	Che_Roots_6	0.0195985	Che_Roots_6	FKDN202654758-1A	NA	NA	nov_2020	Chevallier	roots	NA	5	159052	NA	ITS1-1F†	X201SC20123127-Z01-F001	Bacteria	Proteobacteria	Gammaproteobacteria	Betaproteobacteriales	Burkholderiaceae	Sphaerotilus
620	SV5	Che_Roots_6	0.0187753	Che_Roots_6	FKDN202654758-1A	NA	NA	nov_2020	Chevallier	roots	NA	5	159052	NA	ITS1-1F†	X201SC20123127-Z01-F001	Bacteria	Proteobacteria	Gammaproteobacteria	Enterobacteriales	Enterobacteriaceae	Klebsiella
549	SV47	Che_Roots_2	0.018743	Che_Roots_2	FKDN202654754-1A	NA	NA	nov_2020	Chevallier	roots	NA	1	169149	NA	ITS1-1F†	X201SC20123127-Z01-F001	Bacteria	Actinobacteria	Actinobacteria	Streptomycetales	Streptomycetaceae	Streptomyces
9	SV10	Che_Roots_2	0.0185961	Che_Roots_2	FKDN202654754-1A	NA	NA	nov_2020	Chevallier	roots	NA	1	169149	NA	ITS1-1F†	X201SC20123127-Z01-F001	Bacteria	Proteobacteria	Alphaproteobacteria	Rhizobiales	Rhizobiaceae	Allorhizobium-Neorhizobium-Pararhizobium-Rhizobium
654	SV6	Che_Rhiz_5	0.0183877	Che_Rhiz_5	FKDN202654752-1A	NA	NA	nov_2020	Chevallier	rhizosphere	NA	4	142946	NA	ITS1-1F†	X201SC20123127-Z01-F001	Bacteria	Actinobacteria	Actinobacteria	Micrococcales	Micrococcaceae	Pseudarthrobacter
351	SV28	Che_Rhiz_6	0.0182396	Che_Rhiz_6	FKDN202654753-1A	NA	NA	nov_2020	Chevallier	rhizosphere	NA	5	152328	NA	ITS1-1F†	X201SC20123127-Z01-F001	Bacteria	Acidobacteria	Acidobacteriia	Acidobacteriales	Acidobacteriaceae_(Subgroup_1)	Granulicella
718	SV8	Che_Roots_6	0.0178491	Che_Roots_6	FKDN202654758-1A	NA	NA	nov_2020	Chevallier	roots	NA	5	159052	NA	ITS1-1F†	X201SC20123127-Z01-F001	Bacteria	Proteobacteria	Alphaproteobacteria	Rhizobiales	Xanthobacteraceae	Pseudolabrys
354	SV28	Che_Rhiz_5	0.0176773	Che_Rhiz_5	FKDN202654752-1A	NA	NA	nov_2020	Chevallier	rhizosphere	NA	4	142946	NA	ITS1-1F†	X201SC20123127-Z01-F001	Bacteria	Acidobacteria	Acidobacteriia	Acidobacteriales	Acidobacteriaceae_(Subgroup_1)	Granulicella
652	SV6	Che_Rhiz_3	0.0176501	Che_Rhiz_3	FKDN202654750-1A	NA	NA	nov_2020	Chevallier	rhizosphere	NA	2	148574	NA	ITS1-1F†	X201SC20123127-Z01-F001	Bacteria	Actinobacteria	Actinobacteria	Micrococcales	Micrococcaceae	Pseudarthrobacter
444	SV37	Che_Roots_6	0.0176433	Che_Roots_6	FKDN202654758-1A	NA	NA	nov_2020	Chevallier	roots	NA	5	159052	NA	ITS1-1F†	X201SC20123127-Z01-F001	Bacteria	Actinobacteria	Thermoleophilia	Solirubrobacterales	Solirubrobacteraceae	Conexibacter
440	SV37	Che_Roots_5	0.0175934	Che_Roots_5	FKDN202654757-1A	NA	NA	nov_2020	Chevallier	roots	NA	4	153857	NA	ITS1-1F†	X201SC20123127-Z01-F001	Bacteria	Actinobacteria	Thermoleophilia	Solirubrobacterales	Solirubrobacteraceae	Conexibacter
108	SV12	Che_Roots_5	0.0173806	Che_Roots_5	FKDN202654757-1A	NA	NA	nov_2020	Chevallier	roots	NA	4	153857	NA	ITS1-1F†	X201SC20123127-Z01-F001	Bacteria	Proteobacteria	Gammaproteobacteria	Betaproteobacteriales	Burkholderiaceae	Sphaerotilus
655	SV6	Che_Rhiz_4	0.0173739	Che_Rhiz_4	FKDN202654751-1A	NA	NA	nov_2020	Chevallier	rhizosphere	NA	3	143428	NA	ITS1-1F†	X201SC20123127-Z01-F001	Bacteria	Actinobacteria	Actinobacteria	Micrococcales	Micrococcaceae	Pseudarthrobacter
615	SV5	Che_Rhiz_5	0.0168833	Che_Rhiz_5	FKDN202654752-1A	NA	NA	nov_2020	Chevallier	rhizosphere	NA	4	142946	NA	ITS1-1F†	X201SC20123127-Z01-F001	Bacteria	Proteobacteria	Gammaproteobacteria	Enterobacteriales	Enterobacteriaceae	Klebsiella
153	SV136	Che_Rhiz_2	0.0164298	Che_Rhiz_2	FKDN202654749-1A	NA	NA	nov_2020	Chevallier	rhizosphere	NA	1	157371	NA	ITS1-1F†	X201SC20123127-Z01-F001	Bacteria	Acidobacteria	Acidobacteriia	Acidobacteriales	Acidobacteriaceae_(Subgroup_1)	Occallatibacter
166	SV136	Che_Rhiz_3	0.0164223	Che_Rhiz_3	FKDN202654750-1A	NA	NA	nov_2020	Chevallier	rhizosphere	NA	2	148574	NA	ITS1-1F†	X201SC20123127-Z01-F001	Bacteria	Acidobacteria	Acidobacteriia	Acidobacteriales	Acidobacteriaceae_(Subgroup_1)	Occallatibacter
538	SV47	Che_Roots_5	0.0164001	Che_Roots_5	FKDN202654757-1A	NA	NA	nov_2020	Chevallier	roots	NA	4	153857	NA	ITS1-1F†	X201SC20123127-Z01-F001	Bacteria	Actinobacteria	Actinobacteria	Streptomycetales	Streptomycetaceae	Streptomyces
156	SV136	Che_Rhiz_4	0.016389	Che_Rhiz_4	FKDN202654751-1A	NA	NA	nov_2020	Chevallier	rhizosphere	NA	3	143428	NA	ITS1-1F†	X201SC20123127-Z01-F001	Bacteria	Acidobacteria	Acidobacteriia	Acidobacteriales	Acidobacteriaceae_(Subgroup_1)	Occallatibacter
668	SV6	Che_Roots_5	0.0162706	Che_Roots_5	FKDN202654757-1A	NA	NA	nov_2020	Chevallier	roots	NA	4	153857	NA	ITS1-1F†	X201SC20123127-Z01-F001	Bacteria	Actinobacteria	Actinobacteria	Micrococcales	Micrococcaceae	Pseudarthrobacter
606	SV5	Che_Rhiz_6	0.0162286	Che_Rhiz_6	FKDN202654753-1A	NA	NA	nov_2020	Chevallier	rhizosphere	NA	5	152328	NA	ITS1-1F†	X201SC20123127-Z01-F001	Bacteria	Proteobacteria	Gammaproteobacteria	Enterobacteriales	Enterobacteriaceae	Klebsiella
356	SV28	Che_Rhiz_3	0.0158408	Che_Rhiz_3	FKDN202654750-1A	NA	NA	nov_2020	Chevallier	rhizosphere	NA	2	148574	NA	ITS1-1F†	X201SC20123127-Z01-F001	Bacteria	Acidobacteria	Acidobacteriia	Acidobacteriales	Acidobacteriaceae_(Subgroup_1)	Granulicella
2	SV10	Che_Roots_4	0.0152899	Che_Roots_4	FKDN202654756-1A	NA	NA	nov_2020	Chevallier	roots	NA	3	168529	NA	ITS1-1F†	X201SC20123127-Z01-F001	Bacteria	Proteobacteria	Alphaproteobacteria	Rhizobiales	Rhizobiaceae	Allorhizobium-Neorhizobium-Pararhizobium-Rhizobium
352	SV28	Che_Rhiz_4	0.0148841	Che_Rhiz_4	FKDN202654751-1A	NA	NA	nov_2020	Chevallier	rhizosphere	NA	3	143428	NA	ITS1-1F†	X201SC20123127-Z01-F001	Bacteria	Acidobacteria	Acidobacteriia	Acidobacteriales	Acidobacteriaceae_(Subgroup_1)	Granulicella
692	SV7	Che_Roots_3	0.0148104	Che_Roots_3	FKDN202654755-1A	NA	NA	nov_2020	Chevallier	roots	NA	2	153822	NA	ITS1-1F†	X201SC20123127-Z01-F001	Bacteria	Proteobacteria	Alphaproteobacteria	Rhizobiales	Devosiaceae	Devosia
159	SV136	Che_Rhiz_5	0.0146684	Che_Rhiz_5	FKDN202654752-1A	NA	NA	nov_2020	Chevallier	rhizosphere	NA	4	142946	NA	ITS1-1F†	X201SC20123127-Z01-F001	Bacteria	Acidobacteria	Acidobacteriia	Acidobacteriales	Acidobacteriaceae_(Subgroup_1)	Occallatibacter
476	SV45	Che_Rhiz_2	0.0146178	Che_Rhiz_2	FKDN202654749-1A	NA	NA	nov_2020	Chevallier	rhizosphere	NA	1	157371	NA	ITS1-1F†	X201SC20123127-Z01-F001	Bacteria	Actinobacteria	Actinobacteria	Corynebacteriales	Mycobacteriaceae	Mycobacterium
719	SV8	Che_Roots_5	0.0144114	Che_Roots_5	FKDN202654757-1A	NA	NA	nov_2020	Chevallier	roots	NA	4	153857	NA	ITS1-1F†	X201SC20123127-Z01-F001	Bacteria	Proteobacteria	Alphaproteobacteria	Rhizobiales	Xanthobacteraceae	Pseudolabrys
353	SV28	Che_Rhiz_2	0.014271	Che_Rhiz_2	FKDN202654749-1A	NA	NA	nov_2020	Chevallier	rhizosphere	NA	1	157371	NA	ITS1-1F†	X201SC20123127-Z01-F001	Bacteria	Acidobacteria	Acidobacteriia	Acidobacteriales	Acidobacteriaceae_(Subgroup_1)	Granulicella
285	SV23	Che_Roots_4	0.0136711	Che_Roots_4	FKDN202654756-1A	NA	NA	nov_2020	Chevallier	roots	NA	3	168529	NA	ITS1-1F†	X201SC20123127-Z01-F001	Bacteria	Proteobacteria	Alphaproteobacteria	Caulobacterales	Caulobacteraceae	Asticcacaulis
545	SV47	Che_Roots_3	0.0135712	Che_Roots_3	FKDN202654755-1A	NA	NA	nov_2020	Chevallier	roots	NA	2	153822	NA	ITS1-1F†	X201SC20123127-Z01-F001	Bacteria	Actinobacteria	Actinobacteria	Streptomycetales	Streptomycetaceae	Streptomyces
419	SV30	Che_Roots_2	0.0134696	Che_Roots_2	FKDN202654754-1A	NA	NA	nov_2020	Chevallier	roots	NA	1	169149	NA	ITS1-1F†	X201SC20123127-Z01-F001	Bacteria	Actinobacteria	Actinobacteria	Frankiales	Acidothermaceae	Acidothermus
122	SV12	Che_Roots_3	0.0133426	Che_Roots_3	FKDN202654755-1A	NA	NA	nov_2020	Chevallier	roots	NA	2	153822	NA	ITS1-1F†	X201SC20123127-Z01-F001	Bacteria	Proteobacteria	Gammaproteobacteria	Betaproteobacteriales	Burkholderiaceae	Sphaerotilus
744	SV9	Che_Roots_2	0.0131371	Che_Roots_2	FKDN202654754-1A	NA	NA	nov_2020	Chevallier	roots	NA	1	169149	NA	ITS1-1F†	X201SC20123127-Z01-F001	Bacteria	Proteobacteria	Gammaproteobacteria	Xanthomonadales	Rhodanobacteraceae	Rhodanobacter
161	SV136	Che_Rhiz_6	0.0131116	Che_Rhiz_6	FKDN202654753-1A	NA	NA	nov_2020	Chevallier	rhizosphere	NA	5	152328	NA	ITS1-1F†	X201SC20123127-Z01-F001	Bacteria	Acidobacteria	Acidobacteriia	Acidobacteriales	Acidobacteriaceae_(Subgroup_1)	Occallatibacter
689	SV7	Che_Roots_2	0.0127892	Che_Roots_2	FKDN202654754-1A	NA	NA	nov_2020	Chevallier	roots	NA	1	169149	NA	ITS1-1F†	X201SC20123127-Z01-F001	Bacteria	Proteobacteria	Alphaproteobacteria	Rhizobiales	Devosiaceae	Devosia
746	SV9	Che_Roots_4	0.0127816	Che_Roots_4	FKDN202654756-1A	NA	NA	nov_2020	Chevallier	roots	NA	3	168529	NA	ITS1-1F†	X201SC20123127-Z01-F001	Bacteria	Proteobacteria	Gammaproteobacteria	Xanthomonadales	Rhodanobacteraceae	Rhodanobacter
612	SV5	Che_Rhiz_4	0.0127044	Che_Rhiz_4	FKDN202654751-1A	NA	NA	nov_2020	Chevallier	rhizosphere	NA	3	143428	NA	ITS1-1F†	X201SC20123127-Z01-F001	Bacteria	Proteobacteria	Gammaproteobacteria	Enterobacteriales	Enterobacteriaceae	Klebsiella
328	SV25	Che_Rhiz_2	0.0125803	Che_Rhiz_2	FKDN202654749-1A	NA	NA	nov_2020	Chevallier	rhizosphere	NA	1	157371	NA	ITS1-1F†	X201SC20123127-Z01-F001	Bacteria	Proteobacteria	Alphaproteobacteria	Rhizobiales	Xanthobacteraceae	Rhodoplanes
743	SV9	Che_Roots_3	0.0125245	Che_Roots_3	FKDN202654755-1A	NA	NA	nov_2020	Chevallier	roots	NA	2	153822	NA	ITS1-1F†	X201SC20123127-Z01-F001	Bacteria	Proteobacteria	Gammaproteobacteria	Xanthomonadales	Rhodanobacteraceae	Rhodanobacter
76	SV114	Che_Rhiz_2	0.0125196	Che_Rhiz_2	FKDN202654749-1A	NA	NA	nov_2020	Chevallier	rhizosphere	NA	1	157371	NA	ITS1-1F†	X201SC20123127-Z01-F001	Bacteria	Proteobacteria	Gammaproteobacteria	Xanthomonadales	Rhodanobacteraceae	Chujaibacter
369	SV28	Che_Roots_5	0.0124874	Che_Roots_5	FKDN202654757-1A	NA	NA	nov_2020	Chevallier	roots	NA	4	153857	NA	ITS1-1F†	X201SC20123127-Z01-F001	Bacteria	Acidobacteria	Acidobacteriia	Acidobacteriales	Acidobacteriaceae_(Subgroup_1)	Granulicella
653	SV6	Che_Rhiz_6	0.0123173	Che_Rhiz_6	FKDN202654753-1A	NA	NA	nov_2020	Chevallier	rhizosphere	NA	5	152328	NA	ITS1-1F†	X201SC20123127-Z01-F001	Bacteria	Actinobacteria	Actinobacteria	Micrococcales	Micrococcaceae	Pseudarthrobacter
529	SV47	Che_Rhiz_4	0.0121754	Che_Rhiz_4	FKDN202654751-1A	NA	NA	nov_2020	Chevallier	rhizosphere	NA	3	143428	NA	ITS1-1F†	X201SC20123127-Z01-F001	Bacteria	Actinobacteria	Actinobacteria	Streptomycetales	Streptomycetaceae	Streptomyces
479	SV45	Che_Rhiz_4	0.0120113	Che_Rhiz_4	FKDN202654751-1A	NA	NA	nov_2020	Chevallier	rhizosphere	NA	3	143428	NA	ITS1-1F†	X201SC20123127-Z01-F001	Bacteria	Actinobacteria	Actinobacteria	Corynebacteriales	Mycobacteriaceae	Mycobacterium
539	SV47	Che_Roots_4	0.0119544	Che_Roots_4	FKDN202654756-1A	NA	NA	nov_2020	Chevallier	roots	NA	3	168529	NA	ITS1-1F†	X201SC20123127-Z01-F001	Bacteria	Actinobacteria	Actinobacteria	Streptomycetales	Streptomycetaceae	Streptomyces
160	SV136	Che_Roots_5	0.0118769	Che_Roots_5	FKDN202654757-1A	NA	NA	nov_2020	Chevallier	roots	NA	4	153857	NA	ITS1-1F†	X201SC20123127-Z01-F001	Bacteria	Acidobacteria	Acidobacteriia	Acidobacteriales	Acidobacteriaceae_(Subgroup_1)	Occallatibacter
663	SV6	Che_Roots_6	0.0116188	Che_Roots_6	FKDN202654758-1A	NA	NA	nov_2020	Chevallier	roots	NA	5	159052	NA	ITS1-1F†	X201SC20123127-Z01-F001	Bacteria	Actinobacteria	Actinobacteria	Micrococcales	Micrococcaceae	Pseudarthrobacter
564	SV48	Che_Rhiz_2	0.0116179	Che_Rhiz_2	FKDN202654749-1A	NA	NA	nov_2020	Chevallier	rhizosphere	NA	1	157371	NA	ITS1-1F†	X201SC20123127-Z01-F001	Bacteria	Proteobacteria	Alphaproteobacteria	Rhizobiales	Beijerinckiaceae	Roseiarcus
116	SV12	Che_Rhiz_6	0.0115832	Che_Rhiz_6	FKDN202654753-1A	NA	NA	nov_2020	Chevallier	rhizosphere	NA	5	152328	NA	ITS1-1F†	X201SC20123127-Z01-F001	Bacteria	Proteobacteria	Gammaproteobacteria	Betaproteobacteriales	Burkholderiaceae	Sphaerotilus
326	SV25	Che_Rhiz_5	0.0115446	Che_Rhiz_5	FKDN202654752-1A	NA	NA	nov_2020	Chevallier	rhizosphere	NA	4	142946	NA	ITS1-1F†	X201SC20123127-Z01-F001	Bacteria	Proteobacteria	Alphaproteobacteria	Rhizobiales	Xanthobacteraceae	Rhodoplanes
368	SV28	Che_Roots_6	0.0114223	Che_Roots_6	FKDN202654758-1A	NA	NA	nov_2020	Chevallier	roots	NA	5	159052	NA	ITS1-1F†	X201SC20123127-Z01-F001	Bacteria	Acidobacteria	Acidobacteriia	Acidobacteriales	Acidobacteriaceae_(Subgroup_1)	Granulicella
327	SV25	Che_Rhiz_3	0.011179	Che_Rhiz_3	FKDN202654750-1A	NA	NA	nov_2020	Chevallier	rhizosphere	NA	2	148574	NA	ITS1-1F†	X201SC20123127-Z01-F001	Bacteria	Proteobacteria	Alphaproteobacteria	Rhizobiales	Xanthobacteraceae	Rhodoplanes
177	SV144	Che_Rhiz_6	0.0111207	Che_Rhiz_6	FKDN202654753-1A	NA	NA	nov_2020	Chevallier	rhizosphere	NA	5	152328	NA	ITS1-1F†	X201SC20123127-Z01-F001	Bacteria	Bacteroidetes	Bacteroidia	Sphingobacteriales	Sphingobacteriaceae	Mucilaginibacter
478	SV45	Che_Rhiz_5	0.0110431	Che_Rhiz_5	FKDN202654752-1A	NA	NA	nov_2020	Chevallier	rhizosphere	NA	4	142946	NA	ITS1-1F†	X201SC20123127-Z01-F001	Bacteria	Actinobacteria	Actinobacteria	Corynebacteriales	Mycobacteriaceae	Mycobacterium
178	SV144	Che_Rhiz_2	0.010881	Che_Rhiz_2	FKDN202654749-1A	NA	NA	nov_2020	Chevallier	rhizosphere	NA	1	157371	NA	ITS1-1F†	X201SC20123127-Z01-F001	Bacteria	Bacteroidetes	Bacteroidia	Sphingobacteriales	Sphingobacteriaceae	Mucilaginibacter
618	SV5	Che_Rhiz_2	0.0108636	Che_Rhiz_2	FKDN202654749-1A	NA	NA	nov_2020	Chevallier	rhizosphere	NA	1	157371	NA	ITS1-1F†	X201SC20123127-Z01-F001	Bacteria	Proteobacteria	Gammaproteobacteria	Enterobacteriales	Enterobacteriaceae	Klebsiella
691	SV7	Che_Roots_4	0.010727	Che_Roots_4	FKDN202654756-1A	NA	NA	nov_2020	Chevallier	roots	NA	3	168529	NA	ITS1-1F†	X201SC20123127-Z01-F001	Bacteria	Proteobacteria	Alphaproteobacteria	Rhizobiales	Devosiaceae	Devosia
432	SV37	Che_Roots_3	0.0105995	Che_Roots_3	FKDN202654755-1A	NA	NA	nov_2020	Chevallier	roots	NA	2	153822	NA	ITS1-1F†	X201SC20123127-Z01-F001	Bacteria	Actinobacteria	Thermoleophilia	Solirubrobacterales	Solirubrobacteraceae	Conexibacter
164	SV136	Che_Roots_6	0.010412	Che_Roots_6	FKDN202654758-1A	NA	NA	nov_2020	Chevallier	roots	NA	5	159052	NA	ITS1-1F†	X201SC20123127-Z01-F001	Bacteria	Acidobacteria	Acidobacteriia	Acidobacteriales	Acidobacteriaceae_(Subgroup_1)	Occallatibacter
329	SV25	Che_Rhiz_6	0.0102359	Che_Rhiz_6	FKDN202654753-1A	NA	NA	nov_2020	Chevallier	rhizosphere	NA	5	152328	NA	ITS1-1F†	X201SC20123127-Z01-F001	Bacteria	Proteobacteria	Alphaproteobacteria	Rhizobiales	Xanthobacteraceae	Rhodoplanes
330	SV25	Che_Rhiz_4	0.0102146	Che_Rhiz_4	FKDN202654751-1A	NA	NA	nov_2020	Chevallier	rhizosphere	NA	3	143428	NA	ITS1-1F†	X201SC20123127-Z01-F001	Bacteria	Proteobacteria	Alphaproteobacteria	Rhizobiales	Xanthobacteraceae	Rhodoplanes
491	SV45	Che_Rhiz_6	0.010065	Che_Rhiz_6	FKDN202654753-1A	NA	NA	nov_2020	Chevallier	rhizosphere	NA	5	152328	NA	ITS1-1F†	X201SC20123127-Z01-F001	Bacteria	Actinobacteria	Actinobacteria	Corynebacteriales	Mycobacteriaceae	Mycobacterium
434	SV37	Che_Roots_2	0.010021	Che_Roots_2	FKDN202654754-1A	NA	NA	nov_2020	Chevallier	roots	NA	1	169149	NA	ITS1-1F†	X201SC20123127-Z01-F001	Bacteria	Actinobacteria	Thermoleophilia	Solirubrobacterales	Solirubrobacteraceae	Conexibacter
204	SV16	Che_Rhiz_6	0.00988397	Che_Rhiz_6	FKDN202654753-1A	NA	NA	nov_2020	Chevallier	rhizosphere	NA	5	152328	NA	ITS1-1F†	X201SC20123127-Z01-F001	Bacteria	Proteobacteria	Gammaproteobacteria	Xanthomonadales	Xanthomonadaceae	Luteimonas
209	SV16	Che_Rhiz_2	0.00986657	Che_Rhiz_2	FKDN202654749-1A	NA	NA	nov_2020	Chevallier	rhizosphere	NA	1	157371	NA	ITS1-1F†	X201SC20123127-Z01-F001	Bacteria	Proteobacteria	Gammaproteobacteria	Xanthomonadales	Xanthomonadaceae	Luteimonas
552	SV48	Che_Rhiz_6	0.00981358	Che_Rhiz_6	FKDN202654753-1A	NA	NA	nov_2020	Chevallier	rhizosphere	NA	5	152328	NA	ITS1-1F†	X201SC20123127-Z01-F001	Bacteria	Proteobacteria	Alphaproteobacteria	Rhizobiales	Beijerinckiaceae	Roseiarcus
601	SV5	Che_Roots_2	0.0097736	Che_Roots_2	FKDN202654754-1A	NA	NA	nov_2020	Chevallier	roots	NA	1	169149	NA	ITS1-1F†	X201SC20123127-Z01-F001	Bacteria	Proteobacteria	Gammaproteobacteria	Enterobacteriales	Enterobacteriaceae	Klebsiella
485	SV45	Che_Rhiz_3	0.00976663	Che_Rhiz_3	FKDN202654750-1A	NA	NA	nov_2020	Chevallier	rhizosphere	NA	2	148574	NA	ITS1-1F†	X201SC20123127-Z01-F001	Bacteria	Actinobacteria	Actinobacteria	Corynebacteriales	Mycobacteriaceae	Mycobacterium
195	SV144	Che_Rhiz_3	0.00957278	Che_Rhiz_3	FKDN202654750-1A	NA	NA	nov_2020	Chevallier	rhizosphere	NA	2	148574	NA	ITS1-1F†	X201SC20123127-Z01-F001	Bacteria	Bacteroidetes	Bacteroidia	Sphingobacteriales	Sphingobacteriaceae	Mucilaginibacter
110	SV12	Che_Rhiz_3	0.00938815	Che_Rhiz_3	FKDN202654750-1A	NA	NA	nov_2020	Chevallier	rhizosphere	NA	2	148574	NA	ITS1-1F†	X201SC20123127-Z01-F001	Bacteria	Proteobacteria	Gammaproteobacteria	Betaproteobacteriales	Burkholderiaceae	Sphaerotilus
421	SV30	Che_Roots_4	0.00933939	Che_Roots_4	FKDN202654756-1A	NA	NA	nov_2020	Chevallier	roots	NA	3	168529	NA	ITS1-1F†	X201SC20123127-Z01-F001	Bacteria	Actinobacteria	Actinobacteria	Frankiales	Acidothermaceae	Acidothermus
576	SV49	Che_Rhiz_2	0.00929434	Che_Rhiz_2	FKDN202654749-1A	NA	NA	nov_2020	Chevallier	rhizosphere	NA	1	157371	NA	ITS1-1F†	X201SC20123127-Z01-F001	Bacteria	Actinobacteria	Actinobacteria	Micrococcales	Microbacteriaceae	Gryllotalpicola
713	SV8	Che_Roots_2	0.00924007	Che_Roots_2	FKDN202654754-1A	NA	NA	nov_2020	Chevallier	roots	NA	1	169149	NA	ITS1-1F†	X201SC20123127-Z01-F001	Bacteria	Proteobacteria	Alphaproteobacteria	Rhizobiales	Xanthobacteraceae	Pseudolabrys
120	SV12	Che_Roots_2	0.00916275	Che_Roots_2	FKDN202654754-1A	NA	NA	nov_2020	Chevallier	roots	NA	1	169149	NA	ITS1-1F†	X201SC20123127-Z01-F001	Bacteria	Proteobacteria	Gammaproteobacteria	Betaproteobacteriales	Burkholderiaceae	Sphaerotilus
562	SV48	Che_Rhiz_4	0.00911106	Che_Rhiz_4	FKDN202654751-1A	NA	NA	nov_2020	Chevallier	rhizosphere	NA	3	143428	NA	ITS1-1F†	X201SC20123127-Z01-F001	Bacteria	Proteobacteria	Alphaproteobacteria	Rhizobiales	Beijerinckiaceae	Roseiarcus
198	SV144	Che_Rhiz_4	0.00910194	Che_Rhiz_4	FKDN202654751-1A	NA	NA	nov_2020	Chevallier	rhizosphere	NA	3	143428	NA	ITS1-1F†	X201SC20123127-Z01-F001	Bacteria	Bacteroidetes	Bacteroidia	Sphingobacteriales	Sphingobacteriaceae	Mucilaginibacter
658	SV6	Che_Roots_2	0.00904676	Che_Roots_2	FKDN202654754-1A	NA	NA	nov_2020	Chevallier	roots	NA	1	169149	NA	ITS1-1F†	X201SC20123127-Z01-F001	Bacteria	Actinobacteria	Actinobacteria	Micrococcales	Micrococcaceae	Pseudarthrobacter
527	SV47	Che_Rhiz_2	0.00904291	Che_Rhiz_2	FKDN202654749-1A	NA	NA	nov_2020	Chevallier	rhizosphere	NA	1	157371	NA	ITS1-1F†	X201SC20123127-Z01-F001	Bacteria	Actinobacteria	Actinobacteria	Streptomycetales	Streptomycetaceae	Streptomyces
531	SV47	Che_Rhiz_3	0.00903737	Che_Rhiz_3	FKDN202654750-1A	NA	NA	nov_2020	Chevallier	rhizosphere	NA	2	148574	NA	ITS1-1F†	X201SC20123127-Z01-F001	Bacteria	Actinobacteria	Actinobacteria	Streptomycetales	Streptomycetaceae	Streptomyces
51	SV102	Che_Rhiz_2	0.00894754	Che_Rhiz_2	FKDN202654749-1A	NA	NA	nov_2020	Chevallier	rhizosphere	NA	1	157371	NA	ITS1-1F†	X201SC20123127-Z01-F001	Bacteria	Actinobacteria	Actinobacteria	Catenulisporales	Actinospicaceae	Actinospica
561	SV48	Che_Rhiz_5	0.00891178	Che_Rhiz_5	FKDN202654752-1A	NA	NA	nov_2020	Chevallier	rhizosphere	NA	4	142946	NA	ITS1-1F†	X201SC20123127-Z01-F001	Bacteria	Proteobacteria	Alphaproteobacteria	Rhizobiales	Beijerinckiaceae	Roseiarcus
657	SV6	Che_Rhiz_2	0.00885217	Che_Rhiz_2	FKDN202654749-1A	NA	NA	nov_2020	Chevallier	rhizosphere	NA	1	157371	NA	ITS1-1F†	X201SC20123127-Z01-F001	Bacteria	Actinobacteria	Actinobacteria	Micrococcales	Micrococcaceae	Pseudarthrobacter
537	SV47	Che_Rhiz_6	0.00879804	Che_Rhiz_6	FKDN202654753-1A	NA	NA	nov_2020	Chevallier	rhizosphere	NA	5	152328	NA	ITS1-1F†	X201SC20123127-Z01-F001	Bacteria	Actinobacteria	Actinobacteria	Streptomycetales	Streptomycetaceae	Streptomyces
559	SV48	Che_Rhiz_3	0.00876966	Che_Rhiz_3	FKDN202654750-1A	NA	NA	nov_2020	Chevallier	rhizosphere	NA	2	148574	NA	ITS1-1F†	X201SC20123127-Z01-F001	Bacteria	Proteobacteria	Alphaproteobacteria	Rhizobiales	Beijerinckiaceae	Roseiarcus
628	SV53	Che_Roots_5	0.00857468	Che_Roots_5	FKDN202654757-1A	NA	NA	nov_2020	Chevallier	roots	NA	4	153857	NA	ITS1-1F†	X201SC20123127-Z01-F001	Bacteria	Actinobacteria	Actinobacteria	Propionibacteriales	Nocardioidaceae	Nocardioides
583	SV49	Che_Rhiz_6	0.00848634	Che_Rhiz_6	FKDN202654753-1A	NA	NA	nov_2020	Chevallier	rhizosphere	NA	5	152328	NA	ITS1-1F†	X201SC20123127-Z01-F001	Bacteria	Actinobacteria	Actinobacteria	Micrococcales	Microbacteriaceae	Gryllotalpicola
188	SV144	Che_Rhiz_5	0.00829537	Che_Rhiz_5	FKDN202654752-1A	NA	NA	nov_2020	Chevallier	rhizosphere	NA	4	142946	NA	ITS1-1F†	X201SC20123127-Z01-F001	Bacteria	Bacteroidetes	Bacteroidia	Sphingobacteriales	Sphingobacteriaceae	Mucilaginibacter
103	SV12	Che_Rhiz_5	0.00823269	Che_Rhiz_5	FKDN202654752-1A	NA	NA	nov_2020	Chevallier	rhizosphere	NA	4	142946	NA	ITS1-1F†	X201SC20123127-Z01-F001	Bacteria	Proteobacteria	Gammaproteobacteria	Betaproteobacteriales	Burkholderiaceae	Sphaerotilus
526	SV47	Che_Rhiz_5	0.00803418	Che_Rhiz_5	FKDN202654752-1A	NA	NA	nov_2020	Chevallier	rhizosphere	NA	4	142946	NA	ITS1-1F†	X201SC20123127-Z01-F001	Bacteria	Actinobacteria	Actinobacteria	Streptomycetales	Streptomycetaceae	Streptomyces
28	SV100	Che_Rhiz_2	0.00801984	Che_Rhiz_2	FKDN202654749-1A	NA	NA	nov_2020	Chevallier	rhizosphere	NA	1	157371	NA	ITS1-1F†	X201SC20123127-Z01-F001	Bacteria	Proteobacteria	Alphaproteobacteria	Caulobacterales	Caulobacteraceae	Phenylobacterium
705	SV8	Che_Roots_4	0.00794293	Che_Roots_4	FKDN202654756-1A	NA	NA	nov_2020	Chevallier	roots	NA	3	168529	NA	ITS1-1F†	X201SC20123127-Z01-F001	Bacteria	Proteobacteria	Alphaproteobacteria	Rhizobiales	Xanthobacteraceae	Pseudolabrys
579	SV49	Che_Rhiz_5	0.00744912	Che_Rhiz_5	FKDN202654752-1A	NA	NA	nov_2020	Chevallier	rhizosphere	NA	4	142946	NA	ITS1-1F†	X201SC20123127-Z01-F001	Bacteria	Actinobacteria	Actinobacteria	Micrococcales	Microbacteriaceae	Gryllotalpicola
210	SV16	Che_Rhiz_5	0.00738643	Che_Rhiz_5	FKDN202654752-1A	NA	NA	nov_2020	Chevallier	rhizosphere	NA	4	142946	NA	ITS1-1F†	X201SC20123127-Z01-F001	Bacteria	Proteobacteria	Gammaproteobacteria	Xanthomonadales	Xanthomonadaceae	Luteimonas
631	SV53	Che_Rhiz_6	0.00733002	Che_Rhiz_6	FKDN202654753-1A	NA	NA	nov_2020	Chevallier	rhizosphere	NA	5	152328	NA	ITS1-1F†	X201SC20123127-Z01-F001	Bacteria	Actinobacteria	Actinobacteria	Propionibacteriales	Nocardioidaceae	Nocardioides
711	SV8	Che_Roots_3	0.00731499	Che_Roots_3	FKDN202654755-1A	NA	NA	nov_2020	Chevallier	roots	NA	2	153822	NA	ITS1-1F†	X201SC20123127-Z01-F001	Bacteria	Proteobacteria	Alphaproteobacteria	Rhizobiales	Xanthobacteraceae	Pseudolabrys
363	SV28	Che_Roots_2	0.00729927	Che_Roots_2	FKDN202654754-1A	NA	NA	nov_2020	Chevallier	roots	NA	1	169149	NA	ITS1-1F†	X201SC20123127-Z01-F001	Bacteria	Acidobacteria	Acidobacteriia	Acidobacteriales	Acidobacteriaceae_(Subgroup_1)	Granulicella
577	SV49	Che_Rhiz_4	0.00725966	Che_Rhiz_4	FKDN202654751-1A	NA	NA	nov_2020	Chevallier	rhizosphere	NA	3	143428	NA	ITS1-1F†	X201SC20123127-Z01-F001	Bacteria	Actinobacteria	Actinobacteria	Micrococcales	Microbacteriaceae	Gryllotalpicola
642	SV53	Che_Roots_6	0.00716584	Che_Roots_6	FKDN202654758-1A	NA	NA	nov_2020	Chevallier	roots	NA	5	159052	NA	ITS1-1F†	X201SC20123127-Z01-F001	Bacteria	Actinobacteria	Actinobacteria	Propionibacteriales	Nocardioidaceae	Nocardioides
101	SV12	Che_Rhiz_2	0.00710081	Che_Rhiz_2	FKDN202654749-1A	NA	NA	nov_2020	Chevallier	rhizosphere	NA	1	157371	NA	ITS1-1F†	X201SC20123127-Z01-F001	Bacteria	Proteobacteria	Gammaproteobacteria	Betaproteobacteriales	Burkholderiaceae	Sphaerotilus
26	SV100	Che_Rhiz_5	0.00703122	Che_Rhiz_5	FKDN202654752-1A	NA	NA	nov_2020	Chevallier	rhizosphere	NA	4	142946	NA	ITS1-1F†	X201SC20123127-Z01-F001	Bacteria	Proteobacteria	Alphaproteobacteria	Caulobacterales	Caulobacteraceae	Phenylobacterium
557	SV48	Che_Roots_5	0.00701144	Che_Roots_5	FKDN202654757-1A	NA	NA	nov_2020	Chevallier	roots	NA	4	153857	NA	ITS1-1F†	X201SC20123127-Z01-F001	Bacteria	Proteobacteria	Alphaproteobacteria	Rhizobiales	Beijerinckiaceae	Roseiarcus
638	SV53	Che_Rhiz_4	0.00699518	Che_Rhiz_4	FKDN202654751-1A	NA	NA	nov_2020	Chevallier	rhizosphere	NA	3	143428	NA	ITS1-1F†	X201SC20123127-Z01-F001	Bacteria	Actinobacteria	Actinobacteria	Propionibacteriales	Nocardioidaceae	Nocardioides
639	SV53	Che_Rhiz_3	0.00696034	Che_Rhiz_3	FKDN202654750-1A	NA	NA	nov_2020	Chevallier	rhizosphere	NA	2	148574	NA	ITS1-1F†	X201SC20123127-Z01-F001	Bacteria	Actinobacteria	Actinobacteria	Propionibacteriales	Nocardioidaceae	Nocardioides
146	SV126	Che_Rhiz_3	0.00693265	Che_Rhiz_3	FKDN202654750-1A	NA	NA	nov_2020	Chevallier	rhizosphere	NA	2	148574	NA	ITS1-1F†	X201SC20123127-Z01-F001	Bacteria	Proteobacteria	Alphaproteobacteria	Caulobacterales	Caulobacteraceae	Caulobacter
104	SV12	Che_Rhiz_4	0.00686749	Che_Rhiz_4	FKDN202654751-1A	NA	NA	nov_2020	Chevallier	rhizosphere	NA	3	143428	NA	ITS1-1F†	X201SC20123127-Z01-F001	Bacteria	Proteobacteria	Gammaproteobacteria	Betaproteobacteriales	Burkholderiaceae	Sphaerotilus
588	SV49	Che_Roots_6	0.00685713	Che_Roots_6	FKDN202654758-1A	NA	NA	nov_2020	Chevallier	roots	NA	5	159052	NA	ITS1-1F†	X201SC20123127-Z01-F001	Bacteria	Actinobacteria	Actinobacteria	Micrococcales	Microbacteriaceae	Gryllotalpicola
29	SV100	Che_Rhiz_6	0.00684739	Che_Rhiz_6	FKDN202654753-1A	NA	NA	nov_2020	Chevallier	rhizosphere	NA	5	152328	NA	ITS1-1F†	X201SC20123127-Z01-F001	Bacteria	Proteobacteria	Alphaproteobacteria	Caulobacterales	Caulobacteraceae	Phenylobacterium
30	SV100	Che_Rhiz_4	0.00668509	Che_Rhiz_4	FKDN202654751-1A	NA	NA	nov_2020	Chevallier	rhizosphere	NA	3	143428	NA	ITS1-1F†	X201SC20123127-Z01-F001	Bacteria	Proteobacteria	Alphaproteobacteria	Caulobacterales	Caulobacteraceae	Phenylobacterium
355	SV28	Che_Roots_4	0.0066621	Che_Roots_4	FKDN202654756-1A	NA	NA	nov_2020	Chevallier	roots	NA	3	168529	NA	ITS1-1F†	X201SC20123127-Z01-F001	Bacteria	Acidobacteria	Acidobacteriia	Acidobacteriales	Acidobacteriaceae_(Subgroup_1)	Granulicella
482	SV45	Che_Roots_6	0.00663261	Che_Roots_6	FKDN202654758-1A	NA	NA	nov_2020	Chevallier	roots	NA	5	159052	NA	ITS1-1F†	X201SC20123127-Z01-F001	Bacteria	Actinobacteria	Actinobacteria	Corynebacteriales	Mycobacteriaceae	Mycobacterium
427	SV37	Che_Roots_4	0.00659984	Che_Roots_4	FKDN202654756-1A	NA	NA	nov_2020	Chevallier	roots	NA	3	168529	NA	ITS1-1F†	X201SC20123127-Z01-F001	Bacteria	Actinobacteria	Thermoleophilia	Solirubrobacterales	Solirubrobacteraceae	Conexibacter
640	SV53	Che_Rhiz_2	0.0065806	Che_Rhiz_2	FKDN202654749-1A	NA	NA	nov_2020	Chevallier	rhizosphere	NA	1	157371	NA	ITS1-1F†	X201SC20123127-Z01-F001	Bacteria	Actinobacteria	Actinobacteria	Propionibacteriales	Nocardioidaceae	Nocardioides
578	SV49	Che_Rhiz_3	0.00657263	Che_Rhiz_3	FKDN202654750-1A	NA	NA	nov_2020	Chevallier	rhizosphere	NA	2	148574	NA	ITS1-1F†	X201SC20123127-Z01-F001	Bacteria	Actinobacteria	Actinobacteria	Micrococcales	Microbacteriaceae	Gryllotalpicola
80	SV114	Che_Rhiz_5	0.00656108	Che_Rhiz_5	FKDN202654752-1A	NA	NA	nov_2020	Chevallier	rhizosphere	NA	4	142946	NA	ITS1-1F†	X201SC20123127-Z01-F001	Bacteria	Proteobacteria	Gammaproteobacteria	Xanthomonadales	Rhodanobacteraceae	Chujaibacter
641	SV53	Che_Rhiz_5	0.00655063	Che_Rhiz_5	FKDN202654752-1A	NA	NA	nov_2020	Chevallier	rhizosphere	NA	4	142946	NA	ITS1-1F†	X201SC20123127-Z01-F001	Bacteria	Actinobacteria	Actinobacteria	Propionibacteriales	Nocardioidaceae	Nocardioides
651	SV6	Che_Roots_4	0.00651979	Che_Roots_4	FKDN202654756-1A	NA	NA	nov_2020	Chevallier	roots	NA	3	168529	NA	ITS1-1F†	X201SC20123127-Z01-F001	Bacteria	Actinobacteria	Actinobacteria	Micrococcales	Micrococcaceae	Pseudarthrobacter
264	SV22	Che_Rhiz_2	0.00644188	Che_Rhiz_2	FKDN202654749-1A	NA	NA	nov_2020	Chevallier	rhizosphere	NA	1	157371	NA	ITS1-1F†	X201SC20123127-Z01-F001	Bacteria	Proteobacteria	Gammaproteobacteria	Betaproteobacteriales	Burkholderiaceae	Rhodoferax
72	SV102	Che_Roots_6	0.00628648	Che_Roots_6	FKDN202654758-1A	NA	NA	nov_2020	Chevallier	roots	NA	5	159052	NA	ITS1-1F†	X201SC20123127-Z01-F001	Bacteria	Actinobacteria	Actinobacteria	Catenulisporales	Actinospicaceae	Actinospica
27	SV100	Che_Rhiz_3	0.00628646	Che_Rhiz_3	FKDN202654750-1A	NA	NA	nov_2020	Chevallier	rhizosphere	NA	2	148574	NA	ITS1-1F†	X201SC20123127-Z01-F001	Bacteria	Proteobacteria	Alphaproteobacteria	Caulobacterales	Caulobacteraceae	Phenylobacterium
211	SV16	Che_Roots_5	0.00625295	Che_Roots_5	FKDN202654757-1A	NA	NA	nov_2020	Chevallier	roots	NA	4	153857	NA	ITS1-1F†	X201SC20123127-Z01-F001	Bacteria	Proteobacteria	Gammaproteobacteria	Xanthomonadales	Xanthomonadaceae	Luteimonas
223	SV16	Che_Roots_6	0.00624906	Che_Roots_6	FKDN202654758-1A	NA	NA	nov_2020	Chevallier	roots	NA	5	159052	NA	ITS1-1F†	X201SC20123127-Z01-F001	Bacteria	Proteobacteria	Gammaproteobacteria	Xanthomonadales	Xanthomonadaceae	Luteimonas
86	SV114	Che_Rhiz_4	0.0062382	Che_Rhiz_4	FKDN202654751-1A	NA	NA	nov_2020	Chevallier	rhizosphere	NA	3	143428	NA	ITS1-1F†	X201SC20123127-Z01-F001	Bacteria	Proteobacteria	Gammaproteobacteria	Xanthomonadales	Rhodanobacteraceae	Chujaibacter
361	SV28	Che_Roots_3	0.00623218	Che_Roots_3	FKDN202654755-1A	NA	NA	nov_2020	Chevallier	roots	NA	2	153822	NA	ITS1-1F†	X201SC20123127-Z01-F001	Bacteria	Acidobacteria	Acidobacteriia	Acidobacteriales	Acidobacteriaceae_(Subgroup_1)	Granulicella
208	SV16	Che_Rhiz_3	0.00617569	Che_Rhiz_3	FKDN202654750-1A	NA	NA	nov_2020	Chevallier	rhizosphere	NA	2	148574	NA	ITS1-1F†	X201SC20123127-Z01-F001	Bacteria	Proteobacteria	Gammaproteobacteria	Xanthomonadales	Xanthomonadaceae	Luteimonas
168	SV136	Che_Roots_3	0.0060878	Che_Roots_3	FKDN202654755-1A	NA	NA	nov_2020	Chevallier	roots	NA	2	153822	NA	ITS1-1F†	X201SC20123127-Z01-F001	Bacteria	Acidobacteria	Acidobacteriia	Acidobacteriales	Acidobacteriaceae_(Subgroup_1)	Occallatibacter
39	SV100	Che_Roots_6	0.00602455	Che_Roots_6	FKDN202654758-1A	NA	NA	nov_2020	Chevallier	roots	NA	5	159052	NA	ITS1-1F†	X201SC20123127-Z01-F001	Bacteria	Proteobacteria	Alphaproteobacteria	Caulobacterales	Caulobacteraceae	Phenylobacterium
509	SV46	Che_Rhiz_2	0.00592167	Che_Rhiz_2	FKDN202654749-1A	NA	NA	nov_2020	Chevallier	rhizosphere	NA	1	157371	NA	ITS1-1F†	X201SC20123127-Z01-F001	Bacteria	Proteobacteria	Gammaproteobacteria	Xanthomonadales	Rhodanobacteraceae	Dyella
118	SV12	Che_Roots_4	0.00587937	Che_Roots_4	FKDN202654756-1A	NA	NA	nov_2020	Chevallier	roots	NA	3	168529	NA	ITS1-1F†	X201SC20123127-Z01-F001	Bacteria	Proteobacteria	Gammaproteobacteria	Betaproteobacteriales	Burkholderiaceae	Sphaerotilus
165	SV136	Che_Roots_2	0.0058456	Che_Roots_2	FKDN202654754-1A	NA	NA	nov_2020	Chevallier	roots	NA	1	169149	NA	ITS1-1F†	X201SC20123127-Z01-F001	Bacteria	Acidobacteria	Acidobacteriia	Acidobacteriales	Acidobacteriaceae_(Subgroup_1)	Occallatibacter
144	SV126	Che_Roots_5	0.0057997	Che_Roots_5	FKDN202654757-1A	NA	NA	nov_2020	Chevallier	roots	NA	4	153857	NA	ITS1-1F†	X201SC20123127-Z01-F001	Bacteria	Proteobacteria	Alphaproteobacteria	Caulobacterales	Caulobacteraceae	Caulobacter
207	SV16	Che_Rhiz_4	0.00576395	Che_Rhiz_4	FKDN202654751-1A	NA	NA	nov_2020	Chevallier	rhizosphere	NA	3	143428	NA	ITS1-1F†	X201SC20123127-Z01-F001	Bacteria	Proteobacteria	Gammaproteobacteria	Xanthomonadales	Xanthomonadaceae	Luteimonas
261	SV22	Che_Rhiz_5	0.00574617	Che_Rhiz_5	FKDN202654752-1A	NA	NA	nov_2020	Chevallier	rhizosphere	NA	4	142946	NA	ITS1-1F†	X201SC20123127-Z01-F001	Bacteria	Proteobacteria	Gammaproteobacteria	Betaproteobacteriales	Burkholderiaceae	Rhodoferax
510	SV46	Che_Rhiz_5	0.00574617	Che_Rhiz_5	FKDN202654752-1A	NA	NA	nov_2020	Chevallier	rhizosphere	NA	4	142946	NA	ITS1-1F†	X201SC20123127-Z01-F001	Bacteria	Proteobacteria	Gammaproteobacteria	Xanthomonadales	Rhodanobacteraceae	Dyella
58	SV102	Che_Roots_5	0.0057072	Che_Roots_5	FKDN202654757-1A	NA	NA	nov_2020	Chevallier	roots	NA	4	153857	NA	ITS1-1F†	X201SC20123127-Z01-F001	Bacteria	Actinobacteria	Actinobacteria	Catenulisporales	Actinospicaceae	Actinospica
134	SV126	Che_Rhiz_5	0.00568348	Che_Rhiz_5	FKDN202654752-1A	NA	NA	nov_2020	Chevallier	rhizosphere	NA	4	142946	NA	ITS1-1F†	X201SC20123127-Z01-F001	Bacteria	Proteobacteria	Alphaproteobacteria	Caulobacterales	Caulobacteraceae	Caulobacter
483	SV45	Che_Roots_5	0.0056702	Che_Roots_5	FKDN202654757-1A	NA	NA	nov_2020	Chevallier	roots	NA	4	153857	NA	ITS1-1F†	X201SC20123127-Z01-F001	Bacteria	Actinobacteria	Actinobacteria	Corynebacteriales	Mycobacteriaceae	Mycobacterium
44	SV100	Che_Roots_5	0.00564245	Che_Roots_5	FKDN202654757-1A	NA	NA	nov_2020	Chevallier	roots	NA	4	153857	NA	ITS1-1F†	X201SC20123127-Z01-F001	Bacteria	Proteobacteria	Alphaproteobacteria	Caulobacterales	Caulobacteraceae	Phenylobacterium
315	SV24	Che_Rhiz_2	0.00561822	Che_Rhiz_2	FKDN202654749-1A	NA	NA	nov_2020	Chevallier	rhizosphere	NA	1	157371	NA	ITS1-1F†	X201SC20123127-Z01-F001	Bacteria	Proteobacteria	Gammaproteobacteria	Betaproteobacteriales	Burkholderiaceae	Curvibacter
259	SV22	Che_Rhiz_3	0.00557566	Che_Rhiz_3	FKDN202654750-1A	NA	NA	nov_2020	Chevallier	rhizosphere	NA	2	148574	NA	ITS1-1F†	X201SC20123127-Z01-F001	Bacteria	Proteobacteria	Gammaproteobacteria	Betaproteobacteriales	Burkholderiaceae	Rhodoferax
53	SV102	Che_Rhiz_6	0.0055503	Che_Rhiz_6	FKDN202654753-1A	NA	NA	nov_2020	Chevallier	rhizosphere	NA	5	152328	NA	ITS1-1F†	X201SC20123127-Z01-F001	Bacteria	Actinobacteria	Actinobacteria	Catenulisporales	Actinospicaceae	Actinospica
629	SV53	Che_Roots_3	0.0055464	Che_Roots_3	FKDN202654755-1A	NA	NA	nov_2020	Chevallier	roots	NA	2	153822	NA	ITS1-1F†	X201SC20123127-Z01-F001	Bacteria	Actinobacteria	Actinobacteria	Propionibacteriales	Nocardioidaceae	Nocardioides
589	SV49	Che_Roots_5	0.00553145	Che_Roots_5	FKDN202654757-1A	NA	NA	nov_2020	Chevallier	roots	NA	4	153857	NA	ITS1-1F†	X201SC20123127-Z01-F001	Bacteria	Actinobacteria	Actinobacteria	Micrococcales	Microbacteriaceae	Gryllotalpicola
504	SV46	Che_Rhiz_6	0.00551009	Che_Rhiz_6	FKDN202654753-1A	NA	NA	nov_2020	Chevallier	rhizosphere	NA	5	152328	NA	ITS1-1F†	X201SC20123127-Z01-F001	Bacteria	Proteobacteria	Gammaproteobacteria	Xanthomonadales	Rhodanobacteraceae	Dyella
262	SV22	Che_Rhiz_4	0.00529882	Che_Rhiz_4	FKDN202654751-1A	NA	NA	nov_2020	Chevallier	rhizosphere	NA	3	143428	NA	ITS1-1F†	X201SC20123127-Z01-F001	Bacteria	Proteobacteria	Gammaproteobacteria	Betaproteobacteriales	Burkholderiaceae	Rhodoferax
571	SV48	Che_Roots_6	0.00529487	Che_Roots_6	FKDN202654758-1A	NA	NA	nov_2020	Chevallier	roots	NA	5	159052	NA	ITS1-1F†	X201SC20123127-Z01-F001	Bacteria	Proteobacteria	Alphaproteobacteria	Rhizobiales	Beijerinckiaceae	Roseiarcus
61	SV102	Che_Rhiz_4	0.0051985	Che_Rhiz_4	FKDN202654751-1A	NA	NA	nov_2020	Chevallier	rhizosphere	NA	3	143428	NA	ITS1-1F†	X201SC20123127-Z01-F001	Bacteria	Actinobacteria	Actinobacteria	Catenulisporales	Actinospicaceae	Actinospica
193	SV144	Che_Roots_6	0.00518261	Che_Roots_6	FKDN202654758-1A	NA	NA	nov_2020	Chevallier	roots	NA	5	159052	NA	ITS1-1F†	X201SC20123127-Z01-F001	Bacteria	Bacteroidetes	Bacteroidia	Sphingobacteriales	Sphingobacteriaceae	Mucilaginibacter
252	SV22	Che_Rhiz_6	0.00514811	Che_Rhiz_6	FKDN202654753-1A	NA	NA	nov_2020	Chevallier	rhizosphere	NA	5	152328	NA	ITS1-1F†	X201SC20123127-Z01-F001	Bacteria	Proteobacteria	Gammaproteobacteria	Betaproteobacteriales	Burkholderiaceae	Rhodoferax
344	SV25	Che_Roots_5	0.00510596	Che_Roots_5	FKDN202654757-1A	NA	NA	nov_2020	Chevallier	roots	NA	4	153857	NA	ITS1-1F†	X201SC20123127-Z01-F001	Bacteria	Proteobacteria	Alphaproteobacteria	Rhizobiales	Xanthobacteraceae	Rhodoplanes
79	SV114	Che_Roots_4	0.00501659	Che_Roots_4	FKDN202654756-1A	NA	NA	nov_2020	Chevallier	roots	NA	3	168529	NA	ITS1-1F†	X201SC20123127-Z01-F001	Bacteria	Proteobacteria	Gammaproteobacteria	Xanthomonadales	Rhodanobacteraceae	Chujaibacter
55	SV102	Che_Rhiz_5	0.00497305	Che_Rhiz_5	FKDN202654752-1A	NA	NA	nov_2020	Chevallier	rhizosphere	NA	4	142946	NA	ITS1-1F†	X201SC20123127-Z01-F001	Bacteria	Actinobacteria	Actinobacteria	Catenulisporales	Actinospicaceae	Actinospica
316	SV24	Che_Rhiz_5	0.00492081	Che_Rhiz_5	FKDN202654752-1A	NA	NA	nov_2020	Chevallier	rhizosphere	NA	4	142946	NA	ITS1-1F†	X201SC20123127-Z01-F001	Bacteria	Proteobacteria	Gammaproteobacteria	Betaproteobacteriales	Burkholderiaceae	Curvibacter
339	SV25	Che_Roots_6	0.00491132	Che_Roots_6	FKDN202654758-1A	NA	NA	nov_2020	Chevallier	roots	NA	5	159052	NA	ITS1-1F†	X201SC20123127-Z01-F001	Bacteria	Proteobacteria	Alphaproteobacteria	Rhizobiales	Xanthobacteraceae	Rhodoplanes
140	SV126	Che_Rhiz_4	0.00489753	Che_Rhiz_4	FKDN202654751-1A	NA	NA	nov_2020	Chevallier	rhizosphere	NA	3	143428	NA	ITS1-1F†	X201SC20123127-Z01-F001	Bacteria	Proteobacteria	Alphaproteobacteria	Caulobacterales	Caulobacteraceae	Caulobacter
171	SV136	Che_Roots_4	0.00487427	Che_Roots_4	FKDN202654756-1A	NA	NA	nov_2020	Chevallier	roots	NA	3	168529	NA	ITS1-1F†	X201SC20123127-Z01-F001	Bacteria	Acidobacteria	Acidobacteriia	Acidobacteriales	Acidobacteriaceae_(Subgroup_1)	Occallatibacter
508	SV46	Che_Rhiz_3	0.00480947	Che_Rhiz_3	FKDN202654750-1A	NA	NA	nov_2020	Chevallier	rhizosphere	NA	2	148574	NA	ITS1-1F†	X201SC20123127-Z01-F001	Bacteria	Proteobacteria	Gammaproteobacteria	Xanthomonadales	Rhodanobacteraceae	Dyella
132	SV126	Che_Rhiz_6	0.00462525	Che_Rhiz_6	FKDN202654753-1A	NA	NA	nov_2020	Chevallier	rhizosphere	NA	5	152328	NA	ITS1-1F†	X201SC20123127-Z01-F001	Bacteria	Proteobacteria	Alphaproteobacteria	Caulobacterales	Caulobacteraceae	Caulobacter
313	SV24	Che_Rhiz_4	0.00459657	Che_Rhiz_4	FKDN202654751-1A	NA	NA	nov_2020	Chevallier	rhizosphere	NA	3	143428	NA	ITS1-1F†	X201SC20123127-Z01-F001	Bacteria	Proteobacteria	Gammaproteobacteria	Betaproteobacteriales	Burkholderiaceae	Curvibacter
128	SV126	Che_Rhiz_2	0.00453446	Che_Rhiz_2	FKDN202654749-1A	NA	NA	nov_2020	Chevallier	rhizosphere	NA	1	157371	NA	ITS1-1F†	X201SC20123127-Z01-F001	Bacteria	Proteobacteria	Alphaproteobacteria	Caulobacterales	Caulobacteraceae	Caulobacter
507	SV46	Che_Rhiz_4	0.00427736	Che_Rhiz_4	FKDN202654751-1A	NA	NA	nov_2020	Chevallier	rhizosphere	NA	3	143428	NA	ITS1-1F†	X201SC20123127-Z01-F001	Bacteria	Proteobacteria	Gammaproteobacteria	Xanthomonadales	Rhodanobacteraceae	Dyella
67	SV102	Che_Rhiz_3	0.00427406	Che_Rhiz_3	FKDN202654750-1A	NA	NA	nov_2020	Chevallier	rhizosphere	NA	2	148574	NA	ITS1-1F†	X201SC20123127-Z01-F001	Bacteria	Actinobacteria	Actinobacteria	Catenulisporales	Actinospicaceae	Actinospica
189	SV144	Che_Roots_5	0.00422722	Che_Roots_5	FKDN202654757-1A	NA	NA	nov_2020	Chevallier	roots	NA	4	153857	NA	ITS1-1F†	X201SC20123127-Z01-F001	Bacteria	Bacteroidetes	Bacteroidia	Sphingobacteriales	Sphingobacteriaceae	Mucilaginibacter
555	SV48	Che_Roots_2	0.00412904	Che_Roots_2	FKDN202654754-1A	NA	NA	nov_2020	Chevallier	roots	NA	1	169149	NA	ITS1-1F†	X201SC20123127-Z01-F001	Bacteria	Proteobacteria	Alphaproteobacteria	Rhizobiales	Beijerinckiaceae	Roseiarcus
205	SV16	Che_Roots_2	0.00404398	Che_Roots_2	FKDN202654754-1A	NA	NA	nov_2020	Chevallier	roots	NA	1	169149	NA	ITS1-1F†	X201SC20123127-Z01-F001	Bacteria	Proteobacteria	Gammaproteobacteria	Xanthomonadales	Xanthomonadaceae	Luteimonas
314	SV24	Che_Rhiz_3	0.00399712	Che_Rhiz_3	FKDN202654750-1A	NA	NA	nov_2020	Chevallier	rhizosphere	NA	2	148574	NA	ITS1-1F†	X201SC20123127-Z01-F001	Bacteria	Proteobacteria	Gammaproteobacteria	Betaproteobacteriales	Burkholderiaceae	Curvibacter
127	SV126	Che_Roots_2	0.00395893	Che_Roots_2	FKDN202654754-1A	NA	NA	nov_2020	Chevallier	roots	NA	1	169149	NA	ITS1-1F†	X201SC20123127-Z01-F001	Bacteria	Proteobacteria	Alphaproteobacteria	Caulobacterales	Caulobacteraceae	Caulobacter
523	SV46	Che_Roots_6	0.00390099	Che_Roots_6	FKDN202654758-1A	NA	NA	nov_2020	Chevallier	roots	NA	5	159052	NA	ITS1-1F†	X201SC20123127-Z01-F001	Bacteria	Proteobacteria	Gammaproteobacteria	Xanthomonadales	Rhodanobacteraceae	Dyella
551	SV48	Che_Roots_3	0.00389812	Che_Roots_3	FKDN202654755-1A	NA	NA	nov_2020	Chevallier	roots	NA	2	153822	NA	ITS1-1F†	X201SC20123127-Z01-F001	Bacteria	Proteobacteria	Alphaproteobacteria	Rhizobiales	Beijerinckiaceae	Roseiarcus
81	SV114	Che_Roots_2	0.00378108	Che_Roots_2	FKDN202654754-1A	NA	NA	nov_2020	Chevallier	roots	NA	1	169149	NA	ITS1-1F†	X201SC20123127-Z01-F001	Bacteria	Proteobacteria	Gammaproteobacteria	Xanthomonadales	Rhodanobacteraceae	Chujaibacter
135	SV126	Che_Roots_6	0.00376066	Che_Roots_6	FKDN202654758-1A	NA	NA	nov_2020	Chevallier	roots	NA	5	159052	NA	ITS1-1F†	X201SC20123127-Z01-F001	Bacteria	Proteobacteria	Alphaproteobacteria	Caulobacterales	Caulobacteraceae	Caulobacter
591	SV49	Che_Roots_3	0.00369359	Che_Roots_3	FKDN202654755-1A	NA	NA	nov_2020	Chevallier	roots	NA	2	153822	NA	ITS1-1F†	X201SC20123127-Z01-F001	Bacteria	Actinobacteria	Actinobacteria	Micrococcales	Microbacteriaceae	Gryllotalpicola
43	SV100	Che_Roots_2	0.0036883	Che_Roots_2	FKDN202654754-1A	NA	NA	nov_2020	Chevallier	roots	NA	1	169149	NA	ITS1-1F†	X201SC20123127-Z01-F001	Bacteria	Proteobacteria	Alphaproteobacteria	Caulobacterales	Caulobacteraceae	Phenylobacterium
306	SV24	Che_Rhiz_6	0.00368009	Che_Rhiz_6	FKDN202654753-1A	NA	NA	nov_2020	Chevallier	rhizosphere	NA	5	152328	NA	ITS1-1F†	X201SC20123127-Z01-F001	Bacteria	Proteobacteria	Gammaproteobacteria	Betaproteobacteriales	Burkholderiaceae	Curvibacter
271	SV22	Che_Roots_6	0.00348002	Che_Roots_6	FKDN202654758-1A	NA	NA	nov_2020	Chevallier	roots	NA	5	159052	NA	ITS1-1F†	X201SC20123127-Z01-F001	Bacteria	Proteobacteria	Gammaproteobacteria	Betaproteobacteriales	Burkholderiaceae	Rhodoferax
495	SV45	Che_Roots_2	0.00347952	Che_Roots_2	FKDN202654754-1A	NA	NA	nov_2020	Chevallier	roots	NA	1	169149	NA	ITS1-1F†	X201SC20123127-Z01-F001	Bacteria	Actinobacteria	Actinobacteria	Corynebacteriales	Mycobacteriaceae	Mycobacterium
597	SV49	Che_Roots_2	0.00347952	Che_Roots_2	FKDN202654754-1A	NA	NA	nov_2020	Chevallier	roots	NA	1	169149	NA	ITS1-1F†	X201SC20123127-Z01-F001	Bacteria	Actinobacteria	Actinobacteria	Micrococcales	Microbacteriaceae	Gryllotalpicola
337	SV25	Che_Roots_3	0.00347703	Che_Roots_3	FKDN202654755-1A	NA	NA	nov_2020	Chevallier	roots	NA	2	153822	NA	ITS1-1F†	X201SC20123127-Z01-F001	Bacteria	Proteobacteria	Alphaproteobacteria	Rhizobiales	Xanthobacteraceae	Rhodoplanes
627	SV53	Che_Roots_2	0.0034486	Che_Roots_2	FKDN202654754-1A	NA	NA	nov_2020	Chevallier	roots	NA	1	169149	NA	ITS1-1F†	X201SC20123127-Z01-F001	Bacteria	Actinobacteria	Actinobacteria	Propionibacteriales	Nocardioidaceae	Nocardioides
257	SV22	Che_Roots_5	0.00344097	Che_Roots_5	FKDN202654757-1A	NA	NA	nov_2020	Chevallier	roots	NA	4	153857	NA	ITS1-1F†	X201SC20123127-Z01-F001	Bacteria	Proteobacteria	Gammaproteobacteria	Betaproteobacteriales	Burkholderiaceae	Rhodoferax
194	SV144	Che_Roots_2	0.0034022	Che_Roots_2	FKDN202654754-1A	NA	NA	nov_2020	Chevallier	roots	NA	1	169149	NA	ITS1-1F†	X201SC20123127-Z01-F001	Bacteria	Bacteroidetes	Bacteroidia	Sphingobacteriales	Sphingobacteriaceae	Mucilaginibacter
493	SV45	Che_Roots_4	0.0033355	Che_Roots_4	FKDN202654756-1A	NA	NA	nov_2020	Chevallier	roots	NA	3	168529	NA	ITS1-1F†	X201SC20123127-Z01-F001	Bacteria	Actinobacteria	Actinobacteria	Corynebacteriales	Mycobacteriaceae	Mycobacterium
303	SV24	Che_Roots_5	0.00331147	Che_Roots_5	FKDN202654757-1A	NA	NA	nov_2020	Chevallier	roots	NA	4	153857	NA	ITS1-1F†	X201SC20123127-Z01-F001	Bacteria	Proteobacteria	Gammaproteobacteria	Betaproteobacteriales	Burkholderiaceae	Curvibacter
343	SV25	Che_Roots_2	0.00324756	Che_Roots_2	FKDN202654754-1A	NA	NA	nov_2020	Chevallier	roots	NA	1	169149	NA	ITS1-1F†	X201SC20123127-Z01-F001	Bacteria	Proteobacteria	Alphaproteobacteria	Rhizobiales	Xanthobacteraceae	Rhodoplanes
511	SV46	Che_Roots_5	0.00320972	Che_Roots_5	FKDN202654757-1A	NA	NA	nov_2020	Chevallier	roots	NA	4	153857	NA	ITS1-1F†	X201SC20123127-Z01-F001	Bacteria	Proteobacteria	Gammaproteobacteria	Xanthomonadales	Rhodanobacteraceae	Dyella
37	SV100	Che_Roots_3	0.00317625	Che_Roots_3	FKDN202654755-1A	NA	NA	nov_2020	Chevallier	roots	NA	2	153822	NA	ITS1-1F†	X201SC20123127-Z01-F001	Bacteria	Proteobacteria	Alphaproteobacteria	Caulobacterales	Caulobacteraceae	Phenylobacterium
52	SV102	Che_Roots_3	0.00293562	Che_Roots_3	FKDN202654755-1A	NA	NA	nov_2020	Chevallier	roots	NA	2	153822	NA	ITS1-1F†	X201SC20123127-Z01-F001	Bacteria	Actinobacteria	Actinobacteria	Catenulisporales	Actinospicaceae	Actinospica
56	SV102	Che_Roots_2	0.00290734	Che_Roots_2	FKDN202654754-1A	NA	NA	nov_2020	Chevallier	roots	NA	1	169149	NA	ITS1-1F†	X201SC20123127-Z01-F001	Bacteria	Actinobacteria	Actinobacteria	Catenulisporales	Actinospicaceae	Actinospica
553	SV48	Che_Roots_4	0.00281961	Che_Roots_4	FKDN202654756-1A	NA	NA	nov_2020	Chevallier	roots	NA	3	168529	NA	ITS1-1F†	X201SC20123127-Z01-F001	Bacteria	Proteobacteria	Alphaproteobacteria	Rhizobiales	Beijerinckiaceae	Roseiarcus
317	SV24	Che_Roots_6	0.00276905	Che_Roots_6	FKDN202654758-1A	NA	NA	nov_2020	Chevallier	roots	NA	5	159052	NA	ITS1-1F†	X201SC20123127-Z01-F001	Bacteria	Proteobacteria	Gammaproteobacteria	Betaproteobacteriales	Burkholderiaceae	Curvibacter
626	SV53	Che_Roots_4	0.00274845	Che_Roots_4	FKDN202654756-1A	NA	NA	nov_2020	Chevallier	roots	NA	3	168529	NA	ITS1-1F†	X201SC20123127-Z01-F001	Bacteria	Actinobacteria	Actinobacteria	Propionibacteriales	Nocardioidaceae	Nocardioides
497	SV45	Che_Roots_3	0.00259875	Che_Roots_3	FKDN202654755-1A	NA	NA	nov_2020	Chevallier	roots	NA	2	153822	NA	ITS1-1F†	X201SC20123127-Z01-F001	Bacteria	Actinobacteria	Actinobacteria	Corynebacteriales	Mycobacteriaceae	Mycobacterium
130	SV126	Che_Roots_3	0.00257468	Che_Roots_3	FKDN202654755-1A	NA	NA	nov_2020	Chevallier	roots	NA	2	153822	NA	ITS1-1F†	X201SC20123127-Z01-F001	Bacteria	Proteobacteria	Alphaproteobacteria	Caulobacterales	Caulobacteraceae	Caulobacter
501	SV46	Che_Roots_4	0.0024994	Che_Roots_4	FKDN202654756-1A	NA	NA	nov_2020	Chevallier	roots	NA	3	168529	NA	ITS1-1F†	X201SC20123127-Z01-F001	Bacteria	Proteobacteria	Gammaproteobacteria	Xanthomonadales	Rhodanobacteraceae	Dyella
78	SV114	Che_Rhiz_6	0.00247351	Che_Rhiz_6	FKDN202654753-1A	NA	NA	nov_2020	Chevallier	rhizosphere	NA	5	152328	NA	ITS1-1F†	X201SC20123127-Z01-F001	Bacteria	Proteobacteria	Gammaproteobacteria	Xanthomonadales	Rhodanobacteraceae	Chujaibacter
251	SV22	Che_Roots_3	0.00245437	Che_Roots_3	FKDN202654755-1A	NA	NA	nov_2020	Chevallier	roots	NA	2	153822	NA	ITS1-1F†	X201SC20123127-Z01-F001	Bacteria	Proteobacteria	Gammaproteobacteria	Betaproteobacteriales	Burkholderiaceae	Rhodoferax
201	SV16	Che_Roots_4	0.00242824	Che_Roots_4	FKDN202654756-1A	NA	NA	nov_2020	Chevallier	roots	NA	3	168529	NA	ITS1-1F†	X201SC20123127-Z01-F001	Bacteria	Proteobacteria	Gammaproteobacteria	Xanthomonadales	Xanthomonadaceae	Luteimonas
54	SV102	Che_Roots_4	0.00236598	Che_Roots_4	FKDN202654756-1A	NA	NA	nov_2020	Chevallier	roots	NA	3	168529	NA	ITS1-1F†	X201SC20123127-Z01-F001	Bacteria	Actinobacteria	Actinobacteria	Catenulisporales	Actinospicaceae	Actinospica
585	SV49	Che_Roots_4	0.00230372	Che_Roots_4	FKDN202654756-1A	NA	NA	nov_2020	Chevallier	roots	NA	3	168529	NA	ITS1-1F†	X201SC20123127-Z01-F001	Bacteria	Actinobacteria	Actinobacteria	Micrococcales	Microbacteriaceae	Gryllotalpicola
129	SV126	Che_Roots_4	0.00226814	Che_Roots_4	FKDN202654756-1A	NA	NA	nov_2020	Chevallier	roots	NA	3	168529	NA	ITS1-1F†	X201SC20123127-Z01-F001	Bacteria	Proteobacteria	Alphaproteobacteria	Caulobacterales	Caulobacteraceae	Caulobacter
335	SV25	Che_Roots_4	0.00211693	Che_Roots_4	FKDN202654756-1A	NA	NA	nov_2020	Chevallier	roots	NA	3	168529	NA	ITS1-1F†	X201SC20123127-Z01-F001	Bacteria	Proteobacteria	Alphaproteobacteria	Rhizobiales	Xanthobacteraceae	Rhodoplanes
197	SV144	Che_Roots_3	0.00206937	Che_Roots_3	FKDN202654755-1A	NA	NA	nov_2020	Chevallier	roots	NA	2	153822	NA	ITS1-1F†	X201SC20123127-Z01-F001	Bacteria	Bacteroidetes	Bacteroidia	Sphingobacteriales	Sphingobacteriaceae	Mucilaginibacter
203	SV16	Che_Roots_3	0.00206937	Che_Roots_3	FKDN202654755-1A	NA	NA	nov_2020	Chevallier	roots	NA	2	153822	NA	ITS1-1F†	X201SC20123127-Z01-F001	Bacteria	Proteobacteria	Gammaproteobacteria	Xanthomonadales	Xanthomonadaceae	Luteimonas
35	SV100	Che_Roots_4	0.00203688	Che_Roots_4	FKDN202654756-1A	NA	NA	nov_2020	Chevallier	roots	NA	3	168529	NA	ITS1-1F†	X201SC20123127-Z01-F001	Bacteria	Proteobacteria	Alphaproteobacteria	Caulobacterales	Caulobacteraceae	Phenylobacterium
255	SV22	Che_Roots_2	0.001964	Che_Roots_2	FKDN202654754-1A	NA	NA	nov_2020	Chevallier	roots	NA	1	169149	NA	ITS1-1F†	X201SC20123127-Z01-F001	Bacteria	Proteobacteria	Gammaproteobacteria	Betaproteobacteriales	Burkholderiaceae	Rhodoferax
304	SV24	Che_Roots_3	0.00191297	Che_Roots_3	FKDN202654755-1A	NA	NA	nov_2020	Chevallier	roots	NA	2	153822	NA	ITS1-1F†	X201SC20123127-Z01-F001	Bacteria	Proteobacteria	Gammaproteobacteria	Betaproteobacteriales	Burkholderiaceae	Curvibacter
505	SV46	Che_Roots_2	0.00187121	Che_Roots_2	FKDN202654754-1A	NA	NA	nov_2020	Chevallier	roots	NA	1	169149	NA	ITS1-1F†	X201SC20123127-Z01-F001	Bacteria	Proteobacteria	Gammaproteobacteria	Xanthomonadales	Rhodanobacteraceae	Dyella
302	SV24	Che_Roots_2	0.00184801	Che_Roots_2	FKDN202654754-1A	NA	NA	nov_2020	Chevallier	roots	NA	1	169149	NA	ITS1-1F†	X201SC20123127-Z01-F001	Bacteria	Proteobacteria	Gammaproteobacteria	Betaproteobacteriales	Burkholderiaceae	Curvibacter
92	SV114	Che_Rhiz_3	0.00179086	Che_Rhiz_3	FKDN202654750-1A	NA	NA	nov_2020	Chevallier	rhizosphere	NA	2	148574	NA	ITS1-1F†	X201SC20123127-Z01-F001	Bacteria	Proteobacteria	Gammaproteobacteria	Xanthomonadales	Rhodanobacteraceae	Chujaibacter
253	SV22	Che_Roots_4	0.00175225	Che_Roots_4	FKDN202654756-1A	NA	NA	nov_2020	Chevallier	roots	NA	3	168529	NA	ITS1-1F†	X201SC20123127-Z01-F001	Bacteria	Proteobacteria	Gammaproteobacteria	Betaproteobacteriales	Burkholderiaceae	Rhodoferax
503	SV46	Che_Roots_3	0.00172047	Che_Roots_3	FKDN202654755-1A	NA	NA	nov_2020	Chevallier	roots	NA	2	153822	NA	ITS1-1F†	X201SC20123127-Z01-F001	Bacteria	Proteobacteria	Gammaproteobacteria	Xanthomonadales	Rhodanobacteraceae	Dyella
187	SV144	Che_Roots_4	0.00169888	Che_Roots_4	FKDN202654756-1A	NA	NA	nov_2020	Chevallier	roots	NA	3	168529	NA	ITS1-1F†	X201SC20123127-Z01-F001	Bacteria	Bacteroidetes	Bacteroidia	Sphingobacteriales	Sphingobacteriaceae	Mucilaginibacter
85	SV114	Che_Roots_6	0.00164646	Che_Roots_6	FKDN202654758-1A	NA	NA	nov_2020	Chevallier	roots	NA	5	159052	NA	ITS1-1F†	X201SC20123127-Z01-F001	Bacteria	Proteobacteria	Gammaproteobacteria	Xanthomonadales	Rhodanobacteraceae	Chujaibacter
301	SV24	Che_Roots_4	0.00136088	Che_Roots_4	FKDN202654756-1A	NA	NA	nov_2020	Chevallier	roots	NA	3	168529	NA	ITS1-1F†	X201SC20123127-Z01-F001	Bacteria	Proteobacteria	Gammaproteobacteria	Betaproteobacteriales	Burkholderiaceae	Curvibacter
90	SV114	Che_Roots_5	0.00131349	Che_Roots_5	FKDN202654757-1A	NA	NA	nov_2020	Chevallier	roots	NA	4	153857	NA	ITS1-1F†	X201SC20123127-Z01-F001	Bacteria	Proteobacteria	Gammaproteobacteria	Xanthomonadales	Rhodanobacteraceae	Chujaibacter
77	SV114	Che_Roots_3	0.000854218	Che_Roots_3	FKDN202654755-1A	NA	NA	nov_2020	Chevallier	roots	NA	2	153822	NA	ITS1-1F†	X201SC20123127-Z01-F001	Bacteria	Proteobacteria	Gammaproteobacteria	Xanthomonadales	Rhodanobacteraceae	Chujaibacter
456	SV4	Soil_4	0.0725612	Soil_4	FKDN202654737-1A	NA	NA	nov_2020	Soil	bulk_soil	NA	4	134188	NA	ITS1-1F†	X201SC20123127-Z01-F001	Bacteria	Proteobacteria	Gammaproteobacteria	Pseudomonadales	Pseudomonadaceae	Pseudomonas
730	SV9	Soil_1	0.0535118	Soil_1	FKDN202654734-1A	NA	NA	nov_2020	Soil	bulk_soil	NA	1	168870	NA	ITS1-1F†	X201SC20123127-Z01-F001	Bacteria	Proteobacteria	Gammaproteobacteria	Xanthomonadales	Rhodanobacteraceae	Rhodanobacter
728	SV9	Soil_3	0.0528284	Soil_3	FKDN202654736-1A	NA	NA	nov_2020	Soil	bulk_soil	NA	3	158868	NA	ITS1-1F†	X201SC20123127-Z01-F001	Bacteria	Proteobacteria	Gammaproteobacteria	Xanthomonadales	Rhodanobacteraceae	Rhodanobacter
740	SV9	Soil_5	0.0518872	Soil_5	FKDN202654738-1A	NA	NA	nov_2020	Soil	bulk_soil	NA	5	160871	NA	ITS1-1F†	X201SC20123127-Z01-F001	Bacteria	Proteobacteria	Gammaproteobacteria	Xanthomonadales	Rhodanobacteraceae	Rhodanobacter
403	SV30	Soil_3	0.0455918	Soil_3	FKDN202654736-1A	NA	NA	nov_2020	Soil	bulk_soil	NA	3	158868	NA	ITS1-1F†	X201SC20123127-Z01-F001	Bacteria	Actinobacteria	Actinobacteria	Frankiales	Acidothermaceae	Acidothermus
729	SV9	Soil_2	0.0447369	Soil_2	FKDN202654735-1A	NA	NA	nov_2020	Soil	bulk_soil	NA	2	139968	NA	ITS1-1F†	X201SC20123127-Z01-F001	Bacteria	Proteobacteria	Gammaproteobacteria	Xanthomonadales	Rhodanobacteraceae	Rhodanobacter
415	SV30	Soil_5	0.0403213	Soil_5	FKDN202654738-1A	NA	NA	nov_2020	Soil	bulk_soil	NA	5	160871	NA	ITS1-1F†	X201SC20123127-Z01-F001	Bacteria	Actinobacteria	Actinobacteria	Frankiales	Acidothermaceae	Acidothermus
405	SV30	Soil_1	0.0392204	Soil_1	FKDN202654734-1A	NA	NA	nov_2020	Soil	bulk_soil	NA	1	168870	NA	ITS1-1F†	X201SC20123127-Z01-F001	Bacteria	Actinobacteria	Actinobacteria	Frankiales	Acidothermaceae	Acidothermus
404	SV30	Soil_2	0.0385657	Soil_2	FKDN202654735-1A	NA	NA	nov_2020	Soil	bulk_soil	NA	2	139968	NA	ITS1-1F†	X201SC20123127-Z01-F001	Bacteria	Actinobacteria	Actinobacteria	Frankiales	Acidothermaceae	Acidothermus
742	SV9	Soil_4	0.0345253	Soil_4	FKDN202654737-1A	NA	NA	nov_2020	Soil	bulk_soil	NA	4	134188	NA	ITS1-1F†	X201SC20123127-Z01-F001	Bacteria	Proteobacteria	Gammaproteobacteria	Xanthomonadales	Rhodanobacteraceae	Rhodanobacter
442	SV37	Soil_2	0.0334995	Soil_2	FKDN202654735-1A	NA	NA	nov_2020	Soil	bulk_soil	NA	2	139968	NA	ITS1-1F†	X201SC20123127-Z01-F001	Bacteria	Actinobacteria	Thermoleophilia	Solirubrobacterales	Solirubrobacteraceae	Conexibacter
720	SV8	Soil_2	0.0332212	Soil_2	FKDN202654735-1A	NA	NA	nov_2020	Soil	bulk_soil	NA	2	139968	NA	ITS1-1F†	X201SC20123127-Z01-F001	Bacteria	Proteobacteria	Alphaproteobacteria	Rhizobiales	Xanthobacteraceae	Pseudolabrys
167	SV136	Soil_1	0.0327376	Soil_1	FKDN202654734-1A	NA	NA	nov_2020	Soil	bulk_soil	NA	1	168870	NA	ITS1-1F†	X201SC20123127-Z01-F001	Bacteria	Acidobacteria	Acidobacteriia	Acidobacteriales	Acidobacteriaceae_(Subgroup_1)	Occallatibacter
154	SV136	Soil_3	0.0325272	Soil_3	FKDN202654736-1A	NA	NA	nov_2020	Soil	bulk_soil	NA	3	158868	NA	ITS1-1F†	X201SC20123127-Z01-F001	Bacteria	Acidobacteria	Acidobacteriia	Acidobacteriales	Acidobacteriaceae_(Subgroup_1)	Occallatibacter
446	SV37	Soil_1	0.0303366	Soil_1	FKDN202654734-1A	NA	NA	nov_2020	Soil	bulk_soil	NA	1	168870	NA	ITS1-1F†	X201SC20123127-Z01-F001	Bacteria	Actinobacteria	Thermoleophilia	Solirubrobacterales	Solirubrobacteraceae	Conexibacter
417	SV30	Soil_4	0.0303045	Soil_4	FKDN202654737-1A	NA	NA	nov_2020	Soil	bulk_soil	NA	4	134188	NA	ITS1-1F†	X201SC20123127-Z01-F001	Bacteria	Actinobacteria	Actinobacteria	Frankiales	Acidothermaceae	Acidothermus
377	SV3	Soil_4	0.0294367	Soil_4	FKDN202654737-1A	NA	NA	nov_2020	Soil	bulk_soil	NA	4	134188	NA	ITS1-1F†	X201SC20123127-Z01-F001	Bacteria	Proteobacteria	Gammaproteobacteria	Betaproteobacteriales	Burkholderiaceae	Massilia
439	SV37	Soil_5	0.0289768	Soil_5	FKDN202654738-1A	NA	NA	nov_2020	Soil	bulk_soil	NA	5	160871	NA	ITS1-1F†	X201SC20123127-Z01-F001	Bacteria	Actinobacteria	Thermoleophilia	Solirubrobacterales	Solirubrobacteraceae	Conexibacter
445	SV37	Soil_3	0.0287873	Soil_3	FKDN202654736-1A	NA	NA	nov_2020	Soil	bulk_soil	NA	3	158868	NA	ITS1-1F†	X201SC20123127-Z01-F001	Bacteria	Actinobacteria	Thermoleophilia	Solirubrobacterales	Solirubrobacteraceae	Conexibacter
610	SV5	Soil_4	0.0276518	Soil_4	FKDN202654737-1A	NA	NA	nov_2020	Soil	bulk_soil	NA	4	134188	NA	ITS1-1F†	X201SC20123127-Z01-F001	Bacteria	Proteobacteria	Gammaproteobacteria	Enterobacteriales	Enterobacteriaceae	Klebsiella
717	SV8	Soil_1	0.027257	Soil_1	FKDN202654734-1A	NA	NA	nov_2020	Soil	bulk_soil	NA	1	168870	NA	ITS1-1F†	X201SC20123127-Z01-F001	Bacteria	Proteobacteria	Alphaproteobacteria	Rhizobiales	Xanthobacteraceae	Pseudolabrys
715	SV8	Soil_3	0.0264478	Soil_3	FKDN202654736-1A	NA	NA	nov_2020	Soil	bulk_soil	NA	3	158868	NA	ITS1-1F†	X201SC20123127-Z01-F001	Bacteria	Proteobacteria	Alphaproteobacteria	Rhizobiales	Xanthobacteraceae	Pseudolabrys
221	SV16	Soil_3	0.025735	Soil_3	FKDN202654736-1A	NA	NA	nov_2020	Soil	bulk_soil	NA	3	158868	NA	ITS1-1F†	X201SC20123127-Z01-F001	Bacteria	Proteobacteria	Gammaproteobacteria	Xanthomonadales	Xanthomonadaceae	Luteimonas
219	SV16	Soil_1	0.0256284	Soil_1	FKDN202654734-1A	NA	NA	nov_2020	Soil	bulk_soil	NA	1	168870	NA	ITS1-1F†	X201SC20123127-Z01-F001	Bacteria	Proteobacteria	Gammaproteobacteria	Xanthomonadales	Xanthomonadaceae	Luteimonas
436	SV37	Soil_4	0.0238452	Soil_4	FKDN202654737-1A	NA	NA	nov_2020	Soil	bulk_soil	NA	4	134188	NA	ITS1-1F†	X201SC20123127-Z01-F001	Bacteria	Actinobacteria	Thermoleophilia	Solirubrobacterales	Solirubrobacteraceae	Conexibacter
170	SV136	Soil_2	0.0233424	Soil_2	FKDN202654735-1A	NA	NA	nov_2020	Soil	bulk_soil	NA	2	139968	NA	ITS1-1F†	X201SC20123127-Z01-F001	Bacteria	Acidobacteria	Acidobacteriia	Acidobacteriales	Acidobacteriaceae_(Subgroup_1)	Occallatibacter
710	SV8	Soil_4	0.0225534	Soil_4	FKDN202654737-1A	NA	NA	nov_2020	Soil	bulk_soil	NA	4	134188	NA	ITS1-1F†	X201SC20123127-Z01-F001	Bacteria	Proteobacteria	Alphaproteobacteria	Rhizobiales	Xanthobacteraceae	Pseudolabrys
459	SV4	Soil_5	0.0221134	Soil_5	FKDN202654738-1A	NA	NA	nov_2020	Soil	bulk_soil	NA	5	160871	NA	ITS1-1F†	X201SC20123127-Z01-F001	Bacteria	Proteobacteria	Gammaproteobacteria	Pseudomonadales	Pseudomonadaceae	Pseudomonas
217	SV16	Soil_2	0.0220329	Soil_2	FKDN202654735-1A	NA	NA	nov_2020	Soil	bulk_soil	NA	2	139968	NA	ITS1-1F†	X201SC20123127-Z01-F001	Bacteria	Proteobacteria	Gammaproteobacteria	Xanthomonadales	Xanthomonadaceae	Luteimonas
709	SV8	Soil_5	0.0219363	Soil_5	FKDN202654738-1A	NA	NA	nov_2020	Soil	bulk_soil	NA	5	160871	NA	ITS1-1F†	X201SC20123127-Z01-F001	Bacteria	Proteobacteria	Alphaproteobacteria	Rhizobiales	Xanthobacteraceae	Pseudolabrys
685	SV7	Soil_5	0.0215997	Soil_5	FKDN202654738-1A	NA	NA	nov_2020	Soil	bulk_soil	NA	5	160871	NA	ITS1-1F†	X201SC20123127-Z01-F001	Bacteria	Proteobacteria	Alphaproteobacteria	Rhizobiales	Devosiaceae	Devosia
687	SV7	Soil_4	0.0215968	Soil_4	FKDN202654737-1A	NA	NA	nov_2020	Soil	bulk_soil	NA	4	134188	NA	ITS1-1F†	X201SC20123127-Z01-F001	Bacteria	Proteobacteria	Alphaproteobacteria	Rhizobiales	Devosiaceae	Devosia
234	SV21	Soil_4	0.0213601	Soil_4	FKDN202654737-1A	NA	NA	nov_2020	Soil	bulk_soil	NA	4	134188	NA	ITS1-1F†	X201SC20123127-Z01-F001	Bacteria	Proteobacteria	Gammaproteobacteria	Betaproteobacteriales	Burkholderiaceae	Burkholderia-Caballeronia-Paraburkholderia
367	SV28	Soil_1	0.0211187	Soil_1	FKDN202654734-1A	NA	NA	nov_2020	Soil	bulk_soil	NA	1	168870	NA	ITS1-1F†	X201SC20123127-Z01-F001	Bacteria	Acidobacteria	Acidobacteriia	Acidobacteriales	Acidobacteriaceae_(Subgroup_1)	Granulicella
680	SV7	Soil_1	0.0207011	Soil_1	FKDN202654734-1A	NA	NA	nov_2020	Soil	bulk_soil	NA	1	168870	NA	ITS1-1F†	X201SC20123127-Z01-F001	Bacteria	Proteobacteria	Alphaproteobacteria	Rhizobiales	Devosiaceae	Devosia
216	SV16	Soil_4	0.0204233	Soil_4	FKDN202654737-1A	NA	NA	nov_2020	Soil	bulk_soil	NA	4	134188	NA	ITS1-1F†	X201SC20123127-Z01-F001	Bacteria	Proteobacteria	Gammaproteobacteria	Xanthomonadales	Xanthomonadaceae	Luteimonas
11	SV10	Soil_4	0.0203049	Soil_4	FKDN202654737-1A	NA	NA	nov_2020	Soil	bulk_soil	NA	4	134188	NA	ITS1-1F†	X201SC20123127-Z01-F001	Bacteria	Proteobacteria	Alphaproteobacteria	Rhizobiales	Rhizobiaceae	Allorhizobium-Neorhizobium-Pararhizobium-Rhizobium
365	SV28	Soil_3	0.0203012	Soil_3	FKDN202654736-1A	NA	NA	nov_2020	Soil	bulk_soil	NA	3	158868	NA	ITS1-1F†	X201SC20123127-Z01-F001	Bacteria	Acidobacteria	Acidobacteriia	Acidobacteriales	Acidobacteriaceae_(Subgroup_1)	Granulicella
284	SV23	Soil_4	0.0198316	Soil_4	FKDN202654737-1A	NA	NA	nov_2020	Soil	bulk_soil	NA	4	134188	NA	ITS1-1F†	X201SC20123127-Z01-F001	Bacteria	Proteobacteria	Alphaproteobacteria	Caulobacterales	Caulobacteraceae	Asticcacaulis
370	SV28	Soil_2	0.0197248	Soil_2	FKDN202654735-1A	NA	NA	nov_2020	Soil	bulk_soil	NA	2	139968	NA	ITS1-1F†	X201SC20123127-Z01-F001	Bacteria	Acidobacteria	Acidobacteriia	Acidobacteriales	Acidobacteriaceae_(Subgroup_1)	Granulicella
157	SV136	Soil_5	0.0180662	Soil_5	FKDN202654738-1A	NA	NA	nov_2020	Soil	bulk_soil	NA	5	160871	NA	ITS1-1F†	X201SC20123127-Z01-F001	Bacteria	Acidobacteria	Acidobacteriia	Acidobacteriales	Acidobacteriaceae_(Subgroup_1)	Occallatibacter
280	SV23	Soil_5	0.0179865	Soil_5	FKDN202654738-1A	NA	NA	nov_2020	Soil	bulk_soil	NA	5	160871	NA	ITS1-1F†	X201SC20123127-Z01-F001	Bacteria	Proteobacteria	Alphaproteobacteria	Caulobacterales	Caulobacteraceae	Asticcacaulis
359	SV28	Soil_5	0.017092	Soil_5	FKDN202654738-1A	NA	NA	nov_2020	Soil	bulk_soil	NA	5	160871	NA	ITS1-1F†	X201SC20123127-Z01-F001	Bacteria	Acidobacteria	Acidobacteriia	Acidobacteriales	Acidobacteriaceae_(Subgroup_1)	Granulicella
683	SV7	Soil_2	0.0160909	Soil_2	FKDN202654735-1A	NA	NA	nov_2020	Soil	bulk_soil	NA	2	139968	NA	ITS1-1F†	X201SC20123127-Z01-F001	Bacteria	Proteobacteria	Alphaproteobacteria	Rhizobiales	Devosiaceae	Devosia
163	SV136	Soil_4	0.0157883	Soil_4	FKDN202654737-1A	NA	NA	nov_2020	Soil	bulk_soil	NA	4	134188	NA	ITS1-1F†	X201SC20123127-Z01-F001	Bacteria	Acidobacteria	Acidobacteriia	Acidobacteriales	Acidobacteriaceae_(Subgroup_1)	Occallatibacter
678	SV7	Soil_3	0.0155634	Soil_3	FKDN202654736-1A	NA	NA	nov_2020	Soil	bulk_soil	NA	3	158868	NA	ITS1-1F†	X201SC20123127-Z01-F001	Bacteria	Proteobacteria	Alphaproteobacteria	Rhizobiales	Devosiaceae	Devosia
360	SV28	Soil_4	0.0148811	Soil_4	FKDN202654737-1A	NA	NA	nov_2020	Soil	bulk_soil	NA	4	134188	NA	ITS1-1F†	X201SC20123127-Z01-F001	Bacteria	Acidobacteria	Acidobacteriia	Acidobacteriales	Acidobacteriaceae_(Subgroup_1)	Granulicella
232	SV21	Soil_5	0.0148603	Soil_5	FKDN202654738-1A	NA	NA	nov_2020	Soil	bulk_soil	NA	5	160871	NA	ITS1-1F†	X201SC20123127-Z01-F001	Bacteria	Proteobacteria	Gammaproteobacteria	Betaproteobacteriales	Burkholderiaceae	Burkholderia-Caballeronia-Paraburkholderia
664	SV6	Soil_4	0.0139738	Soil_4	FKDN202654737-1A	NA	NA	nov_2020	Soil	bulk_soil	NA	4	134188	NA	ITS1-1F†	X201SC20123127-Z01-F001	Bacteria	Actinobacteria	Actinobacteria	Micrococcales	Micrococcaceae	Pseudarthrobacter
215	SV16	Soil_5	0.0134434	Soil_5	FKDN202654738-1A	NA	NA	nov_2020	Soil	bulk_soil	NA	5	160871	NA	ITS1-1F†	X201SC20123127-Z01-F001	Bacteria	Proteobacteria	Gammaproteobacteria	Xanthomonadales	Xanthomonadaceae	Luteimonas
342	SV25	Soil_1	0.0132161	Soil_1	FKDN202654734-1A	NA	NA	nov_2020	Soil	bulk_soil	NA	1	168870	NA	ITS1-1F†	X201SC20123127-Z01-F001	Bacteria	Proteobacteria	Alphaproteobacteria	Rhizobiales	Xanthobacteraceae	Rhodoplanes
380	SV3	Soil_5	0.0130891	Soil_5	FKDN202654738-1A	NA	NA	nov_2020	Soil	bulk_soil	NA	5	160871	NA	ITS1-1F†	X201SC20123127-Z01-F001	Bacteria	Proteobacteria	Gammaproteobacteria	Betaproteobacteriales	Burkholderiaceae	Massilia
341	SV25	Soil_2	0.0130462	Soil_2	FKDN202654735-1A	NA	NA	nov_2020	Soil	bulk_soil	NA	2	139968	NA	ITS1-1F†	X201SC20123127-Z01-F001	Bacteria	Proteobacteria	Alphaproteobacteria	Rhizobiales	Xanthobacteraceae	Rhodoplanes
290	SV23	Soil_2	0.0126943	Soil_2	FKDN202654735-1A	NA	NA	nov_2020	Soil	bulk_soil	NA	2	139968	NA	ITS1-1F†	X201SC20123127-Z01-F001	Bacteria	Proteobacteria	Alphaproteobacteria	Caulobacterales	Caulobacteraceae	Asticcacaulis
477	SV45	Soil_3	0.0124692	Soil_3	FKDN202654736-1A	NA	NA	nov_2020	Soil	bulk_soil	NA	3	158868	NA	ITS1-1F†	X201SC20123127-Z01-F001	Bacteria	Actinobacteria	Actinobacteria	Corynebacteriales	Mycobacteriaceae	Mycobacterium
14	SV10	Soil_5	0.012239	Soil_5	FKDN202654738-1A	NA	NA	nov_2020	Soil	bulk_soil	NA	5	160871	NA	ITS1-1F†	X201SC20123127-Z01-F001	Bacteria	Proteobacteria	Alphaproteobacteria	Rhizobiales	Rhizobiaceae	Allorhizobium-Neorhizobium-Pararhizobium-Rhizobium
42	SV100	Soil_1	0.0120261	Soil_1	FKDN202654734-1A	NA	NA	nov_2020	Soil	bulk_soil	NA	1	168870	NA	ITS1-1F†	X201SC20123127-Z01-F001	Bacteria	Proteobacteria	Alphaproteobacteria	Caulobacterales	Caulobacteraceae	Phenylobacterium
484	SV45	Soil_2	0.0118431	Soil_2	FKDN202654735-1A	NA	NA	nov_2020	Soil	bulk_soil	NA	2	139968	NA	ITS1-1F†	X201SC20123127-Z01-F001	Bacteria	Actinobacteria	Actinobacteria	Corynebacteriales	Mycobacteriaceae	Mycobacterium
36	SV100	Soil_3	0.0117732	Soil_3	FKDN202654736-1A	NA	NA	nov_2020	Soil	bulk_soil	NA	3	158868	NA	ITS1-1F†	X201SC20123127-Z01-F001	Bacteria	Proteobacteria	Alphaproteobacteria	Caulobacterales	Caulobacteraceae	Phenylobacterium
590	SV49	Soil_2	0.0115239	Soil_2	FKDN202654735-1A	NA	NA	nov_2020	Soil	bulk_soil	NA	2	139968	NA	ITS1-1F†	X201SC20123127-Z01-F001	Bacteria	Actinobacteria	Actinobacteria	Micrococcales	Microbacteriaceae	Gryllotalpicola
565	SV48	Soil_1	0.0113997	Soil_1	FKDN202654734-1A	NA	NA	nov_2020	Soil	bulk_soil	NA	1	168870	NA	ITS1-1F†	X201SC20123127-Z01-F001	Bacteria	Proteobacteria	Alphaproteobacteria	Rhizobiales	Beijerinckiaceae	Roseiarcus
336	SV25	Soil_3	0.0113791	Soil_3	FKDN202654736-1A	NA	NA	nov_2020	Soil	bulk_soil	NA	3	158868	NA	ITS1-1F†	X201SC20123127-Z01-F001	Bacteria	Proteobacteria	Alphaproteobacteria	Rhizobiales	Xanthobacteraceae	Rhodoplanes
281	SV23	Soil_3	0.0113204	Soil_3	FKDN202654736-1A	NA	NA	nov_2020	Soil	bulk_soil	NA	3	158868	NA	ITS1-1F†	X201SC20123127-Z01-F001	Bacteria	Proteobacteria	Alphaproteobacteria	Caulobacterales	Caulobacteraceae	Asticcacaulis
574	SV48	Soil_3	0.011203	Soil_3	FKDN202654736-1A	NA	NA	nov_2020	Soil	bulk_soil	NA	3	158868	NA	ITS1-1F†	X201SC20123127-Z01-F001	Bacteria	Proteobacteria	Alphaproteobacteria	Rhizobiales	Beijerinckiaceae	Roseiarcus
182	SV144	Soil_5	0.011194	Soil_5	FKDN202654738-1A	NA	NA	nov_2020	Soil	bulk_soil	NA	5	160871	NA	ITS1-1F†	X201SC20123127-Z01-F001	Bacteria	Bacteroidetes	Bacteroidia	Sphingobacteriales	Sphingobacteriaceae	Mucilaginibacter
41	SV100	Soil_2	0.0111392	Soil_2	FKDN202654735-1A	NA	NA	nov_2020	Soil	bulk_soil	NA	2	139968	NA	ITS1-1F†	X201SC20123127-Z01-F001	Bacteria	Proteobacteria	Alphaproteobacteria	Caulobacterales	Caulobacteraceae	Phenylobacterium
71	SV102	Soil_5	0.0109549	Soil_5	FKDN202654738-1A	NA	NA	nov_2020	Soil	bulk_soil	NA	5	160871	NA	ITS1-1F†	X201SC20123127-Z01-F001	Bacteria	Actinobacteria	Actinobacteria	Catenulisporales	Actinospicaceae	Actinospica
89	SV114	Soil_5	0.0109371	Soil_5	FKDN202654738-1A	NA	NA	nov_2020	Soil	bulk_soil	NA	5	160871	NA	ITS1-1F†	X201SC20123127-Z01-F001	Bacteria	Proteobacteria	Gammaproteobacteria	Xanthomonadales	Rhodanobacteraceae	Chujaibacter
334	SV25	Soil_5	0.010822	Soil_5	FKDN202654738-1A	NA	NA	nov_2020	Soil	bulk_soil	NA	5	160871	NA	ITS1-1F†	X201SC20123127-Z01-F001	Bacteria	Proteobacteria	Alphaproteobacteria	Rhizobiales	Xanthobacteraceae	Rhodoplanes
563	SV48	Soil_2	0.0106645	Soil_2	FKDN202654735-1A	NA	NA	nov_2020	Soil	bulk_soil	NA	2	139968	NA	ITS1-1F†	X201SC20123127-Z01-F001	Bacteria	Proteobacteria	Alphaproteobacteria	Rhizobiales	Beijerinckiaceae	Roseiarcus
331	SV25	Soil_4	0.0105617	Soil_4	FKDN202654737-1A	NA	NA	nov_2020	Soil	bulk_soil	NA	4	134188	NA	ITS1-1F†	X201SC20123127-Z01-F001	Bacteria	Proteobacteria	Alphaproteobacteria	Rhizobiales	Xanthobacteraceae	Rhodoplanes
613	SV5	Soil_5	0.0105475	Soil_5	FKDN202654738-1A	NA	NA	nov_2020	Soil	bulk_soil	NA	5	160871	NA	ITS1-1F†	X201SC20123127-Z01-F001	Bacteria	Proteobacteria	Gammaproteobacteria	Enterobacteriales	Enterobacteriaceae	Klebsiella
287	SV23	Soil_1	0.0105124	Soil_1	FKDN202654734-1A	NA	NA	nov_2020	Soil	bulk_soil	NA	1	168870	NA	ITS1-1F†	X201SC20123127-Z01-F001	Bacteria	Proteobacteria	Alphaproteobacteria	Caulobacterales	Caulobacteraceae	Asticcacaulis
486	SV45	Soil_5	0.0104589	Soil_5	FKDN202654738-1A	NA	NA	nov_2020	Soil	bulk_soil	NA	5	160871	NA	ITS1-1F†	X201SC20123127-Z01-F001	Bacteria	Actinobacteria	Actinobacteria	Corynebacteriales	Mycobacteriaceae	Mycobacterium
192	SV144	Soil_4	0.0104532	Soil_4	FKDN202654737-1A	NA	NA	nov_2020	Soil	bulk_soil	NA	4	134188	NA	ITS1-1F†	X201SC20123127-Z01-F001	Bacteria	Bacteroidetes	Bacteroidia	Sphingobacteriales	Sphingobacteriaceae	Mucilaginibacter
265	SV22	Soil_1	0.00967722	Soil_1	FKDN202654734-1A	NA	NA	nov_2020	Soil	bulk_soil	NA	1	168870	NA	ITS1-1F†	X201SC20123127-Z01-F001	Bacteria	Proteobacteria	Gammaproteobacteria	Betaproteobacteriales	Burkholderiaceae	Rhodoferax
570	SV48	Soil_5	0.00966188	Soil_5	FKDN202654738-1A	NA	NA	nov_2020	Soil	bulk_soil	NA	5	160871	NA	ITS1-1F†	X201SC20123127-Z01-F001	Bacteria	Proteobacteria	Alphaproteobacteria	Rhizobiales	Beijerinckiaceae	Roseiarcus
521	SV46	Soil_3	0.00953427	Soil_3	FKDN202654736-1A	NA	NA	nov_2020	Soil	bulk_soil	NA	3	158868	NA	ITS1-1F†	X201SC20123127-Z01-F001	Bacteria	Proteobacteria	Gammaproteobacteria	Xanthomonadales	Rhodanobacteraceae	Dyella
235	SV21	Soil_2	0.00934679	Soil_2	FKDN202654735-1A	NA	NA	nov_2020	Soil	bulk_soil	NA	2	139968	NA	ITS1-1F†	X201SC20123127-Z01-F001	Bacteria	Proteobacteria	Gammaproteobacteria	Betaproteobacteriales	Burkholderiaceae	Burkholderia-Caballeronia-Paraburkholderia
274	SV22	Soil_3	0.00928271	Soil_3	FKDN202654736-1A	NA	NA	nov_2020	Soil	bulk_soil	NA	3	158868	NA	ITS1-1F†	X201SC20123127-Z01-F001	Bacteria	Proteobacteria	Gammaproteobacteria	Betaproteobacteriales	Burkholderiaceae	Rhodoferax
31	SV100	Soil_4	0.00920082	Soil_4	FKDN202654737-1A	NA	NA	nov_2020	Soil	bulk_soil	NA	4	134188	NA	ITS1-1F†	X201SC20123127-Z01-F001	Bacteria	Proteobacteria	Alphaproteobacteria	Caulobacterales	Caulobacteraceae	Phenylobacterium
311	SV24	Soil_1	0.00912394	Soil_1	FKDN202654734-1A	NA	NA	nov_2020	Soil	bulk_soil	NA	1	168870	NA	ITS1-1F†	X201SC20123127-Z01-F001	Bacteria	Proteobacteria	Gammaproteobacteria	Betaproteobacteriales	Burkholderiaceae	Curvibacter
481	SV45	Soil_1	0.0088212	Soil_1	FKDN202654734-1A	NA	NA	nov_2020	Soil	bulk_soil	NA	1	168870	NA	ITS1-1F†	X201SC20123127-Z01-F001	Bacteria	Actinobacteria	Actinobacteria	Corynebacteriales	Mycobacteriaceae	Mycobacterium
488	SV45	Soil_4	0.00881622	Soil_4	FKDN202654737-1A	NA	NA	nov_2020	Soil	bulk_soil	NA	4	134188	NA	ITS1-1F†	X201SC20123127-Z01-F001	Bacteria	Actinobacteria	Actinobacteria	Corynebacteriales	Mycobacteriaceae	Mycobacterium
230	SV21	Soil_3	0.00867895	Soil_3	FKDN202654736-1A	NA	NA	nov_2020	Soil	bulk_soil	NA	3	158868	NA	ITS1-1F†	X201SC20123127-Z01-F001	Bacteria	Proteobacteria	Gammaproteobacteria	Betaproteobacteriales	Burkholderiaceae	Burkholderia-Caballeronia-Paraburkholderia
34	SV100	Soil_5	0.00867001	Soil_5	FKDN202654738-1A	NA	NA	nov_2020	Soil	bulk_soil	NA	5	160871	NA	ITS1-1F†	X201SC20123127-Z01-F001	Bacteria	Proteobacteria	Alphaproteobacteria	Caulobacterales	Caulobacteraceae	Phenylobacterium
580	SV49	Soil_5	0.0083689	Soil_5	FKDN202654738-1A	NA	NA	nov_2020	Soil	bulk_soil	NA	5	160871	NA	ITS1-1F†	X201SC20123127-Z01-F001	Bacteria	Actinobacteria	Actinobacteria	Micrococcales	Microbacteriaceae	Gryllotalpicola
534	SV47	Soil_4	0.00834287	Soil_4	FKDN202654737-1A	NA	NA	nov_2020	Soil	bulk_soil	NA	4	134188	NA	ITS1-1F†	X201SC20123127-Z01-F001	Bacteria	Actinobacteria	Actinobacteria	Streptomycetales	Streptomycetaceae	Streptomyces
270	SV22	Soil_5	0.00814751	Soil_5	FKDN202654738-1A	NA	NA	nov_2020	Soil	bulk_soil	NA	5	160871	NA	ITS1-1F†	X201SC20123127-Z01-F001	Bacteria	Proteobacteria	Gammaproteobacteria	Betaproteobacteriales	Burkholderiaceae	Rhodoferax
667	SV6	Soil_5	0.00800581	Soil_5	FKDN202654738-1A	NA	NA	nov_2020	Soil	bulk_soil	NA	5	160871	NA	ITS1-1F†	X201SC20123127-Z01-F001	Bacteria	Actinobacteria	Actinobacteria	Micrococcales	Micrococcaceae	Pseudarthrobacter
584	SV49	Soil_4	0.00795827	Soil_4	FKDN202654737-1A	NA	NA	nov_2020	Soil	bulk_soil	NA	4	134188	NA	ITS1-1F†	X201SC20123127-Z01-F001	Bacteria	Actinobacteria	Actinobacteria	Micrococcales	Microbacteriaceae	Gryllotalpicola
567	SV48	Soil_4	0.00792868	Soil_4	FKDN202654737-1A	NA	NA	nov_2020	Soil	bulk_soil	NA	4	134188	NA	ITS1-1F†	X201SC20123127-Z01-F001	Bacteria	Proteobacteria	Alphaproteobacteria	Rhizobiales	Beijerinckiaceae	Roseiarcus
581	SV49	Soil_3	0.00785718	Soil_3	FKDN202654736-1A	NA	NA	nov_2020	Soil	bulk_soil	NA	3	158868	NA	ITS1-1F†	X201SC20123127-Z01-F001	Bacteria	Actinobacteria	Actinobacteria	Micrococcales	Microbacteriaceae	Gryllotalpicola
587	SV49	Soil_1	0.00780859	Soil_1	FKDN202654734-1A	NA	NA	nov_2020	Soil	bulk_soil	NA	1	168870	NA	ITS1-1F†	X201SC20123127-Z01-F001	Bacteria	Actinobacteria	Actinobacteria	Micrococcales	Microbacteriaceae	Gryllotalpicola
323	SV24	Soil_3	0.00780687	Soil_3	FKDN202654736-1A	NA	NA	nov_2020	Soil	bulk_soil	NA	3	158868	NA	ITS1-1F†	X201SC20123127-Z01-F001	Bacteria	Proteobacteria	Gammaproteobacteria	Betaproteobacteriales	Burkholderiaceae	Curvibacter
179	SV144	Soil_3	0.00779848	Soil_3	FKDN202654736-1A	NA	NA	nov_2020	Soil	bulk_soil	NA	3	158868	NA	ITS1-1F†	X201SC20123127-Z01-F001	Bacteria	Bacteroidetes	Bacteroidia	Sphingobacteriales	Sphingobacteriaceae	Mucilaginibacter
113	SV12	Soil_4	0.00773145	Soil_4	FKDN202654737-1A	NA	NA	nov_2020	Soil	bulk_soil	NA	4	134188	NA	ITS1-1F†	X201SC20123127-Z01-F001	Bacteria	Proteobacteria	Gammaproteobacteria	Betaproteobacteriales	Burkholderiaceae	Sphaerotilus
321	SV24	Soil_5	0.00758072	Soil_5	FKDN202654738-1A	NA	NA	nov_2020	Soil	bulk_soil	NA	5	160871	NA	ITS1-1F†	X201SC20123127-Z01-F001	Bacteria	Proteobacteria	Gammaproteobacteria	Betaproteobacteriales	Burkholderiaceae	Curvibacter
309	SV24	Soil_2	0.00743978	Soil_2	FKDN202654735-1A	NA	NA	nov_2020	Soil	bulk_soil	NA	2	139968	NA	ITS1-1F†	X201SC20123127-Z01-F001	Bacteria	Proteobacteria	Gammaproteobacteria	Betaproteobacteriales	Burkholderiaceae	Curvibacter
263	SV22	Soil_2	0.0074316	Soil_2	FKDN202654735-1A	NA	NA	nov_2020	Soil	bulk_soil	NA	2	139968	NA	ITS1-1F†	X201SC20123127-Z01-F001	Bacteria	Proteobacteria	Gammaproteobacteria	Betaproteobacteriales	Burkholderiaceae	Rhodoferax
469	SV4	Soil_1	0.00742233	Soil_1	FKDN202654734-1A	NA	NA	nov_2020	Soil	bulk_soil	NA	1	168870	NA	ITS1-1F†	X201SC20123127-Z01-F001	Bacteria	Proteobacteria	Gammaproteobacteria	Pseudomonadales	Pseudomonadaceae	Pseudomonas
516	SV46	Soil_4	0.00736657	Soil_4	FKDN202654737-1A	NA	NA	nov_2020	Soil	bulk_soil	NA	4	134188	NA	ITS1-1F†	X201SC20123127-Z01-F001	Bacteria	Proteobacteria	Gammaproteobacteria	Xanthomonadales	Rhodanobacteraceae	Dyella
91	SV114	Soil_3	0.00727858	Soil_3	FKDN202654736-1A	NA	NA	nov_2020	Soil	bulk_soil	NA	3	158868	NA	ITS1-1F†	X201SC20123127-Z01-F001	Bacteria	Proteobacteria	Gammaproteobacteria	Xanthomonadales	Rhodanobacteraceae	Chujaibacter
634	SV53	Soil_2	0.00715332	Soil_2	FKDN202654735-1A	NA	NA	nov_2020	Soil	bulk_soil	NA	2	139968	NA	ITS1-1F†	X201SC20123127-Z01-F001	Bacteria	Actinobacteria	Actinobacteria	Propionibacteriales	Nocardioidaceae	Nocardioides
199	SV144	Soil_2	0.00713695	Soil_2	FKDN202654735-1A	NA	NA	nov_2020	Soil	bulk_soil	NA	2	139968	NA	ITS1-1F†	X201SC20123127-Z01-F001	Bacteria	Bacteroidetes	Bacteroidia	Sphingobacteriales	Sphingobacteriaceae	Mucilaginibacter
532	SV47	Soil_5	0.0067394	Soil_5	FKDN202654738-1A	NA	NA	nov_2020	Soil	bulk_soil	NA	5	160871	NA	ITS1-1F†	X201SC20123127-Z01-F001	Bacteria	Actinobacteria	Actinobacteria	Streptomycetales	Streptomycetaceae	Streptomyces
519	SV46	Soil_1	0.00663939	Soil_1	FKDN202654734-1A	NA	NA	nov_2020	Soil	bulk_soil	NA	1	168870	NA	ITS1-1F†	X201SC20123127-Z01-F001	Bacteria	Proteobacteria	Gammaproteobacteria	Xanthomonadales	Rhodanobacteraceae	Dyella
646	SV53	Soil_5	0.00653572	Soil_5	FKDN202654738-1A	NA	NA	nov_2020	Soil	bulk_soil	NA	5	160871	NA	ITS1-1F†	X201SC20123127-Z01-F001	Bacteria	Actinobacteria	Actinobacteria	Propionibacteriales	Nocardioidaceae	Nocardioides
515	SV46	Soil_5	0.00639402	Soil_5	FKDN202654738-1A	NA	NA	nov_2020	Soil	bulk_soil	NA	5	160871	NA	ITS1-1F†	X201SC20123127-Z01-F001	Bacteria	Proteobacteria	Gammaproteobacteria	Xanthomonadales	Rhodanobacteraceae	Dyella
143	SV126	Soil_4	0.00632125	Soil_4	FKDN202654737-1A	NA	NA	nov_2020	Soil	bulk_soil	NA	4	134188	NA	ITS1-1F†	X201SC20123127-Z01-F001	Bacteria	Proteobacteria	Alphaproteobacteria	Caulobacterales	Caulobacteraceae	Caulobacter
517	SV46	Soil_2	0.0062612	Soil_2	FKDN202654735-1A	NA	NA	nov_2020	Soil	bulk_soil	NA	2	139968	NA	ITS1-1F†	X201SC20123127-Z01-F001	Bacteria	Proteobacteria	Gammaproteobacteria	Xanthomonadales	Rhodanobacteraceae	Dyella
236	SV21	Soil_1	0.00623225	Soil_1	FKDN202654734-1A	NA	NA	nov_2020	Soil	bulk_soil	NA	1	168870	NA	ITS1-1F†	X201SC20123127-Z01-F001	Bacteria	Proteobacteria	Gammaproteobacteria	Betaproteobacteriales	Burkholderiaceae	Burkholderia-Caballeronia-Paraburkholderia
647	SV53	Soil_4	0.0060254	Soil_4	FKDN202654737-1A	NA	NA	nov_2020	Soil	bulk_soil	NA	4	134188	NA	ITS1-1F†	X201SC20123127-Z01-F001	Bacteria	Actinobacteria	Actinobacteria	Propionibacteriales	Nocardioidaceae	Nocardioides
397	SV3	Soil_3	0.00577758	Soil_3	FKDN202654736-1A	NA	NA	nov_2020	Soil	bulk_soil	NA	3	158868	NA	ITS1-1F†	X201SC20123127-Z01-F001	Bacteria	Proteobacteria	Gammaproteobacteria	Betaproteobacteriales	Burkholderiaceae	Massilia
137	SV126	Soil_5	0.00572097	Soil_5	FKDN202654738-1A	NA	NA	nov_2020	Soil	bulk_soil	NA	5	160871	NA	ITS1-1F†	X201SC20123127-Z01-F001	Bacteria	Proteobacteria	Alphaproteobacteria	Caulobacterales	Caulobacteraceae	Caulobacter
636	SV53	Soil_1	0.00517789	Soil_1	FKDN202654734-1A	NA	NA	nov_2020	Soil	bulk_soil	NA	1	168870	NA	ITS1-1F†	X201SC20123127-Z01-F001	Bacteria	Actinobacteria	Actinobacteria	Propionibacteriales	Nocardioidaceae	Nocardioides
322	SV24	Soil_4	0.0050787	Soil_4	FKDN202654737-1A	NA	NA	nov_2020	Soil	bulk_soil	NA	4	134188	NA	ITS1-1F†	X201SC20123127-Z01-F001	Bacteria	Proteobacteria	Gammaproteobacteria	Betaproteobacteriales	Burkholderiaceae	Curvibacter
196	SV144	Soil_1	0.0050213	Soil_1	FKDN202654734-1A	NA	NA	nov_2020	Soil	bulk_soil	NA	1	168870	NA	ITS1-1F†	X201SC20123127-Z01-F001	Bacteria	Bacteroidetes	Bacteroidia	Sphingobacteriales	Sphingobacteriaceae	Mucilaginibacter
267	SV22	Soil_4	0.00500966	Soil_4	FKDN202654737-1A	NA	NA	nov_2020	Soil	bulk_soil	NA	4	134188	NA	ITS1-1F†	X201SC20123127-Z01-F001	Bacteria	Proteobacteria	Gammaproteobacteria	Betaproteobacteriales	Burkholderiaceae	Rhodoferax
648	SV53	Soil_3	0.00496419	Soil_3	FKDN202654736-1A	NA	NA	nov_2020	Soil	bulk_soil	NA	3	158868	NA	ITS1-1F†	X201SC20123127-Z01-F001	Bacteria	Actinobacteria	Actinobacteria	Propionibacteriales	Nocardioidaceae	Nocardioides
394	SV3	Soil_1	0.00492734	Soil_1	FKDN202654734-1A	NA	NA	nov_2020	Soil	bulk_soil	NA	1	168870	NA	ITS1-1F†	X201SC20123127-Z01-F001	Bacteria	Proteobacteria	Gammaproteobacteria	Betaproteobacteriales	Burkholderiaceae	Massilia
64	SV102	Soil_2	0.00482072	Soil_2	FKDN202654735-1A	NA	NA	nov_2020	Soil	bulk_soil	NA	2	139968	NA	ITS1-1F†	X201SC20123127-Z01-F001	Bacteria	Actinobacteria	Actinobacteria	Catenulisporales	Actinospicaceae	Actinospica
384	SV3	Soil_2	0.00474706	Soil_2	FKDN202654735-1A	NA	NA	nov_2020	Soil	bulk_soil	NA	2	139968	NA	ITS1-1F†	X201SC20123127-Z01-F001	Bacteria	Proteobacteria	Gammaproteobacteria	Betaproteobacteriales	Burkholderiaceae	Massilia
66	SV102	Soil_1	0.00449933	Soil_1	FKDN202654734-1A	NA	NA	nov_2020	Soil	bulk_soil	NA	1	168870	NA	ITS1-1F†	X201SC20123127-Z01-F001	Bacteria	Actinobacteria	Actinobacteria	Catenulisporales	Actinospicaceae	Actinospica
535	SV47	Soil_2	0.00418232	Soil_2	FKDN202654735-1A	NA	NA	nov_2020	Soil	bulk_soil	NA	2	139968	NA	ITS1-1F†	X201SC20123127-Z01-F001	Bacteria	Actinobacteria	Actinobacteria	Streptomycetales	Streptomycetaceae	Streptomyces
111	SV12	Soil_5	0.00417117	Soil_5	FKDN202654738-1A	NA	NA	nov_2020	Soil	bulk_soil	NA	5	160871	NA	ITS1-1F†	X201SC20123127-Z01-F001	Bacteria	Proteobacteria	Gammaproteobacteria	Betaproteobacteriales	Burkholderiaceae	Sphaerotilus
21	SV10	Soil_1	0.00408176	Soil_1	FKDN202654734-1A	NA	NA	nov_2020	Soil	bulk_soil	NA	1	168870	NA	ITS1-1F†	X201SC20123127-Z01-F001	Bacteria	Proteobacteria	Alphaproteobacteria	Rhizobiales	Rhizobiaceae	Allorhizobium-Neorhizobium-Pararhizobium-Rhizobium
68	SV102	Soil_4	0.00380656	Soil_4	FKDN202654737-1A	NA	NA	nov_2020	Soil	bulk_soil	NA	4	134188	NA	ITS1-1F†	X201SC20123127-Z01-F001	Bacteria	Actinobacteria	Actinobacteria	Catenulisporales	Actinospicaceae	Actinospica
17	SV10	Soil_2	0.00358485	Soil_2	FKDN202654735-1A	NA	NA	nov_2020	Soil	bulk_soil	NA	2	139968	NA	ITS1-1F†	X201SC20123127-Z01-F001	Bacteria	Proteobacteria	Alphaproteobacteria	Rhizobiales	Rhizobiaceae	Allorhizobium-Neorhizobium-Pararhizobium-Rhizobium
73	SV102	Soil_3	0.0034632	Soil_3	FKDN202654736-1A	NA	NA	nov_2020	Soil	bulk_soil	NA	3	158868	NA	ITS1-1F†	X201SC20123127-Z01-F001	Bacteria	Actinobacteria	Actinobacteria	Catenulisporales	Actinospicaceae	Actinospica
84	SV114	Soil_1	0.00331969	Soil_1	FKDN202654734-1A	NA	NA	nov_2020	Soil	bulk_soil	NA	1	168870	NA	ITS1-1F†	X201SC20123127-Z01-F001	Bacteria	Proteobacteria	Gammaproteobacteria	Xanthomonadales	Rhodanobacteraceae	Chujaibacter
20	SV10	Soil_3	0.00329549	Soil_3	FKDN202654736-1A	NA	NA	nov_2020	Soil	bulk_soil	NA	3	158868	NA	ITS1-1F†	X201SC20123127-Z01-F001	Bacteria	Proteobacteria	Alphaproteobacteria	Rhizobiales	Rhizobiaceae	Allorhizobium-Neorhizobium-Pararhizobium-Rhizobium
138	SV126	Soil_1	0.00328837	Soil_1	FKDN202654734-1A	NA	NA	nov_2020	Soil	bulk_soil	NA	1	168870	NA	ITS1-1F†	X201SC20123127-Z01-F001	Bacteria	Proteobacteria	Alphaproteobacteria	Caulobacterales	Caulobacteraceae	Caulobacter
141	SV126	Soil_2	0.00303648	Soil_2	FKDN202654735-1A	NA	NA	nov_2020	Soil	bulk_soil	NA	2	139968	NA	ITS1-1F†	X201SC20123127-Z01-F001	Bacteria	Proteobacteria	Alphaproteobacteria	Caulobacterales	Caulobacteraceae	Caulobacter
472	SV4	Soil_3	0.00303554	Soil_3	FKDN202654736-1A	NA	NA	nov_2020	Soil	bulk_soil	NA	3	158868	NA	ITS1-1F†	X201SC20123127-Z01-F001	Bacteria	Proteobacteria	Gammaproteobacteria	Pseudomonadales	Pseudomonadaceae	Pseudomonas
126	SV126	Soil_3	0.00280913	Soil_3	FKDN202654736-1A	NA	NA	nov_2020	Soil	bulk_soil	NA	3	158868	NA	ITS1-1F†	X201SC20123127-Z01-F001	Bacteria	Proteobacteria	Alphaproteobacteria	Caulobacterales	Caulobacteraceae	Caulobacter
87	SV114	Soil_2	0.00256996	Soil_2	FKDN202654735-1A	NA	NA	nov_2020	Soil	bulk_soil	NA	2	139968	NA	ITS1-1F†	X201SC20123127-Z01-F001	Bacteria	Proteobacteria	Gammaproteobacteria	Xanthomonadales	Rhodanobacteraceae	Chujaibacter
530	SV47	Soil_3	0.00239824	Soil_3	FKDN202654736-1A	NA	NA	nov_2020	Soil	bulk_soil	NA	3	158868	NA	ITS1-1F†	X201SC20123127-Z01-F001	Bacteria	Actinobacteria	Actinobacteria	Streptomycetales	Streptomycetaceae	Streptomyces
102	SV12	Soil_3	0.00235632	Soil_3	FKDN202654736-1A	NA	NA	nov_2020	Soil	bulk_soil	NA	3	158868	NA	ITS1-1F†	X201SC20123127-Z01-F001	Bacteria	Proteobacteria	Gammaproteobacteria	Betaproteobacteriales	Burkholderiaceae	Sphaerotilus
536	SV47	Soil_1	0.00226532	Soil_1	FKDN202654734-1A	NA	NA	nov_2020	Soil	bulk_soil	NA	1	168870	NA	ITS1-1F†	X201SC20123127-Z01-F001	Bacteria	Actinobacteria	Actinobacteria	Streptomycetales	Streptomycetaceae	Streptomyces
82	SV114	Soil_4	0.0021794	Soil_4	FKDN202654737-1A	NA	NA	nov_2020	Soil	bulk_soil	NA	4	134188	NA	ITS1-1F†	X201SC20123127-Z01-F001	Bacteria	Proteobacteria	Gammaproteobacteria	Xanthomonadales	Rhodanobacteraceae	Chujaibacter
109	SV12	Soil_2	0.00198885	Soil_2	FKDN202654735-1A	NA	NA	nov_2020	Soil	bulk_soil	NA	2	139968	NA	ITS1-1F†	X201SC20123127-Z01-F001	Bacteria	Proteobacteria	Gammaproteobacteria	Betaproteobacteriales	Burkholderiaceae	Sphaerotilus
614	SV5	Soil_1	0.00178512	Soil_1	FKDN202654734-1A	NA	NA	nov_2020	Soil	bulk_soil	NA	1	168870	NA	ITS1-1F†	X201SC20123127-Z01-F001	Bacteria	Proteobacteria	Gammaproteobacteria	Enterobacteriales	Enterobacteriaceae	Klebsiella
106	SV12	Soil_1	0.0017538	Soil_1	FKDN202654734-1A	NA	NA	nov_2020	Soil	bulk_soil	NA	1	168870	NA	ITS1-1F†	X201SC20123127-Z01-F001	Bacteria	Proteobacteria	Gammaproteobacteria	Betaproteobacteriales	Burkholderiaceae	Sphaerotilus
669	SV6	Soil_2	0.00159599	Soil_2	FKDN202654735-1A	NA	NA	nov_2020	Soil	bulk_soil	NA	2	139968	NA	ITS1-1F†	X201SC20123127-Z01-F001	Bacteria	Actinobacteria	Actinobacteria	Micrococcales	Micrococcaceae	Pseudarthrobacter
463	SV4	Soil_2	0.00146504	Soil_2	FKDN202654735-1A	NA	NA	nov_2020	Soil	bulk_soil	NA	2	139968	NA	ITS1-1F†	X201SC20123127-Z01-F001	Bacteria	Proteobacteria	Gammaproteobacteria	Pseudomonadales	Pseudomonadaceae	Pseudomonas
608	SV5	Soil_2	0.00133409	Soil_2	FKDN202654735-1A	NA	NA	nov_2020	Soil	bulk_soil	NA	2	139968	NA	ITS1-1F†	X201SC20123127-Z01-F001	Bacteria	Proteobacteria	Gammaproteobacteria	Enterobacteriales	Enterobacteriaceae	Klebsiella
660	SV6	Soil_3	0.00128298	Soil_3	FKDN202654736-1A	NA	NA	nov_2020	Soil	bulk_soil	NA	3	158868	NA	ITS1-1F†	X201SC20123127-Z01-F001	Bacteria	Actinobacteria	Actinobacteria	Micrococcales	Micrococcaceae	Pseudarthrobacter
662	SV6	Soil_1	0.00119008	Soil_1	FKDN202654734-1A	NA	NA	nov_2020	Soil	bulk_soil	NA	1	168870	NA	ITS1-1F†	X201SC20123127-Z01-F001	Bacteria	Actinobacteria	Actinobacteria	Micrococcales	Micrococcaceae	Pseudarthrobacter
625	SV5	Soil_3	0.00101464	Soil_3	FKDN202654736-1A	NA	NA	nov_2020	Soil	bulk_soil	NA	3	158868	NA	ITS1-1F†	X201SC20123127-Z01-F001	Bacteria	Proteobacteria	Gammaproteobacteria	Enterobacteriales	Enterobacteriaceae	Klebsiella
619	SV5	Ti_Roots_1	0.176009	Ti_Roots_1	FKDN202654744-1A	NA	NA	nov_2020	Tipple	roots	NA	1	138221	NA	ITS1-1F†	X201SC20123127-Z01-F001	Bacteria	Proteobacteria	Gammaproteobacteria	Enterobacteriales	Enterobacteriaceae	Klebsiella
473	SV4	Ti_Roots_6	0.13358	Ti_Roots_6	FKDN202654748-1A	NA	NA	nov_2020	Tipple	roots	NA	5	132836	NA	ITS1-1F†	X201SC20123127-Z01-F001	Bacteria	Proteobacteria	Gammaproteobacteria	Pseudomonadales	Pseudomonadaceae	Pseudomonas
465	SV4	Ti_Roots_1	0.118097	Ti_Roots_1	FKDN202654744-1A	NA	NA	nov_2020	Tipple	roots	NA	1	138221	NA	ITS1-1F†	X201SC20123127-Z01-F001	Bacteria	Proteobacteria	Gammaproteobacteria	Pseudomonadales	Pseudomonadaceae	Pseudomonas
467	SV4	Ti_Roots_2	0.093836	Ti_Roots_2	FKDN202654745-1A	NA	NA	nov_2020	Tipple	roots	NA	2	166122	NA	ITS1-1F†	X201SC20123127-Z01-F001	Bacteria	Proteobacteria	Gammaproteobacteria	Pseudomonadales	Pseudomonadaceae	Pseudomonas
381	SV3	Ti_Roots_5	0.0874549	Ti_Roots_5	FKDN202654747-1A	NA	NA	nov_2020	Tipple	roots	NA	4	147810	NA	ITS1-1F†	X201SC20123127-Z01-F001	Bacteria	Proteobacteria	Gammaproteobacteria	Betaproteobacteriales	Burkholderiaceae	Massilia
466	SV4	Ti_Rhiz_2	0.0740222	Ti_Rhiz_2	FKDN202654740-1A	NA	NA	nov_2020	Tipple	rhizosphere	NA	2	145607	NA	ITS1-1F†	X201SC20123127-Z01-F001	Bacteria	Proteobacteria	Gammaproteobacteria	Pseudomonadales	Pseudomonadaceae	Pseudomonas
398	SV3	Ti_Roots_6	0.0687215	Ti_Roots_6	FKDN202654748-1A	NA	NA	nov_2020	Tipple	roots	NA	5	132836	NA	ITS1-1F†	X201SC20123127-Z01-F001	Bacteria	Proteobacteria	Gammaproteobacteria	Betaproteobacteriales	Burkholderiaceae	Massilia
382	SV3	Ti_Rhiz_6	0.0645496	Ti_Rhiz_6	FKDN202654743-1A	NA	NA	nov_2020	Tipple	rhizosphere	NA	5	163472	NA	ITS1-1F†	X201SC20123127-Z01-F001	Bacteria	Proteobacteria	Gammaproteobacteria	Betaproteobacteriales	Burkholderiaceae	Massilia
461	SV4	Ti_Rhiz_6	0.0572894	Ti_Rhiz_6	FKDN202654743-1A	NA	NA	nov_2020	Tipple	rhizosphere	NA	5	163472	NA	ITS1-1F†	X201SC20123127-Z01-F001	Bacteria	Proteobacteria	Gammaproteobacteria	Pseudomonadales	Pseudomonadaceae	Pseudomonas
379	SV3	Ti_Rhiz_5	0.0533781	Ti_Rhiz_5	FKDN202654742-1A	NA	NA	nov_2020	Tipple	rhizosphere	NA	4	137928	NA	ITS1-1F†	X201SC20123127-Z01-F001	Bacteria	Proteobacteria	Gammaproteobacteria	Betaproteobacteriales	Burkholderiaceae	Massilia
616	SV5	Ti_Rhiz_1	0.0524806	Ti_Rhiz_1	FKDN202654739-1A	NA	NA	nov_2020	Tipple	rhizosphere	NA	1	140148	NA	ITS1-1F†	X201SC20123127-Z01-F001	Bacteria	Proteobacteria	Gammaproteobacteria	Enterobacteriales	Enterobacteriaceae	Klebsiella
458	SV4	Ti_Rhiz_5	0.0511323	Ti_Rhiz_5	FKDN202654742-1A	NA	NA	nov_2020	Tipple	rhizosphere	NA	4	137928	NA	ITS1-1F†	X201SC20123127-Z01-F001	Bacteria	Proteobacteria	Gammaproteobacteria	Pseudomonadales	Pseudomonadaceae	Pseudomonas
460	SV4	Ti_Roots_5	0.0487825	Ti_Roots_5	FKDN202654747-1A	NA	NA	nov_2020	Tipple	roots	NA	4	147810	NA	ITS1-1F†	X201SC20123127-Z01-F001	Bacteria	Proteobacteria	Gammaproteobacteria	Pseudomonadales	Pseudomonadaceae	Pseudomonas
623	SV5	Ti_Roots_6	0.045777	Ti_Roots_6	FKDN202654748-1A	NA	NA	nov_2020	Tipple	roots	NA	5	132836	NA	ITS1-1F†	X201SC20123127-Z01-F001	Bacteria	Proteobacteria	Gammaproteobacteria	Enterobacteriales	Enterobacteriaceae	Klebsiella
750	SV9	Ti_Rhiz_4	0.0434481	Ti_Rhiz_4	FKDN202654741-1A	NA	NA	nov_2020	Tipple	rhizosphere	NA	3	155460	NA	ITS1-1F†	X201SC20123127-Z01-F001	Bacteria	Proteobacteria	Gammaproteobacteria	Xanthomonadales	Rhodanobacteraceae	Rhodanobacter
388	SV3	Ti_Roots_2	0.0407022	Ti_Roots_2	FKDN202654745-1A	NA	NA	nov_2020	Tipple	roots	NA	2	166122	NA	ITS1-1F†	X201SC20123127-Z01-F001	Bacteria	Proteobacteria	Gammaproteobacteria	Betaproteobacteriales	Burkholderiaceae	Massilia
25	SV10	Ti_Roots_6	0.0389312	Ti_Roots_6	FKDN202654748-1A	NA	NA	nov_2020	Tipple	roots	NA	5	132836	NA	ITS1-1F†	X201SC20123127-Z01-F001	Bacteria	Proteobacteria	Alphaproteobacteria	Rhizobiales	Rhizobiaceae	Allorhizobium-Neorhizobium-Pararhizobium-Rhizobium
737	SV9	Ti_Roots_5	0.0385747	Ti_Roots_5	FKDN202654747-1A	NA	NA	nov_2020	Tipple	roots	NA	4	147810	NA	ITS1-1F†	X201SC20123127-Z01-F001	Bacteria	Proteobacteria	Gammaproteobacteria	Xanthomonadales	Rhodanobacteraceae	Rhodanobacter
378	SV3	Ti_Roots_4	0.0371664	Ti_Roots_4	FKDN202654746-1A	NA	NA	nov_2020	Tipple	roots	NA	3	151349	NA	ITS1-1F†	X201SC20123127-Z01-F001	Bacteria	Proteobacteria	Gammaproteobacteria	Betaproteobacteriales	Burkholderiaceae	Massilia
422	SV30	Ti_Rhiz_5	0.036554	Ti_Rhiz_5	FKDN202654742-1A	NA	NA	nov_2020	Tipple	rhizosphere	NA	4	137928	NA	ITS1-1F†	X201SC20123127-Z01-F001	Bacteria	Actinobacteria	Actinobacteria	Frankiales	Acidothermaceae	Acidothermus
383	SV3	Ti_Rhiz_1	0.0355588	Ti_Rhiz_1	FKDN202654739-1A	NA	NA	nov_2020	Tipple	rhizosphere	NA	1	140148	NA	ITS1-1F†	X201SC20123127-Z01-F001	Bacteria	Proteobacteria	Gammaproteobacteria	Betaproteobacteriales	Burkholderiaceae	Massilia
242	SV21	Ti_Roots_6	0.0351645	Ti_Roots_6	FKDN202654748-1A	NA	NA	nov_2020	Tipple	roots	NA	5	132836	NA	ITS1-1F†	X201SC20123127-Z01-F001	Bacteria	Proteobacteria	Gammaproteobacteria	Betaproteobacteriales	Burkholderiaceae	Burkholderia-Caballeronia-Paraburkholderia
462	SV4	Ti_Rhiz_1	0.0342849	Ti_Rhiz_1	FKDN202654739-1A	NA	NA	nov_2020	Tipple	rhizosphere	NA	1	140148	NA	ITS1-1F†	X201SC20123127-Z01-F001	Bacteria	Proteobacteria	Gammaproteobacteria	Pseudomonadales	Pseudomonadaceae	Pseudomonas
425	SV30	Ti_Rhiz_4	0.0340976	Ti_Rhiz_4	FKDN202654741-1A	NA	NA	nov_2020	Tipple	rhizosphere	NA	3	155460	NA	ITS1-1F†	X201SC20123127-Z01-F001	Bacteria	Actinobacteria	Actinobacteria	Frankiales	Acidothermaceae	Acidothermus
734	SV9	Ti_Rhiz_1	0.0336831	Ti_Rhiz_1	FKDN202654739-1A	NA	NA	nov_2020	Tipple	rhizosphere	NA	1	140148	NA	ITS1-1F†	X201SC20123127-Z01-F001	Bacteria	Proteobacteria	Gammaproteobacteria	Xanthomonadales	Rhodanobacteraceae	Rhodanobacter
409	SV30	Ti_Rhiz_1	0.0332116	Ti_Rhiz_1	FKDN202654739-1A	NA	NA	nov_2020	Tipple	rhizosphere	NA	1	140148	NA	ITS1-1F†	X201SC20123127-Z01-F001	Bacteria	Actinobacteria	Actinobacteria	Frankiales	Acidothermaceae	Acidothermus
389	SV3	Ti_Rhiz_4	0.0329326	Ti_Rhiz_4	FKDN202654741-1A	NA	NA	nov_2020	Tipple	rhizosphere	NA	3	155460	NA	ITS1-1F†	X201SC20123127-Z01-F001	Bacteria	Proteobacteria	Gammaproteobacteria	Betaproteobacteriales	Burkholderiaceae	Massilia
747	SV9	Ti_Rhiz_5	0.0328405	Ti_Rhiz_5	FKDN202654742-1A	NA	NA	nov_2020	Tipple	rhizosphere	NA	4	137928	NA	ITS1-1F†	X201SC20123127-Z01-F001	Bacteria	Proteobacteria	Gammaproteobacteria	Xanthomonadales	Rhodanobacteraceae	Rhodanobacter
661	SV6	Ti_Rhiz_2	0.0325516	Ti_Rhiz_2	FKDN202654740-1A	NA	NA	nov_2020	Tipple	rhizosphere	NA	2	145607	NA	ITS1-1F†	X201SC20123127-Z01-F001	Bacteria	Actinobacteria	Actinobacteria	Micrococcales	Micrococcaceae	Pseudarthrobacter
748	SV9	Ti_Rhiz_2	0.032078	Ti_Rhiz_2	FKDN202654740-1A	NA	NA	nov_2020	Tipple	rhizosphere	NA	2	145607	NA	ITS1-1F†	X201SC20123127-Z01-F001	Bacteria	Proteobacteria	Gammaproteobacteria	Xanthomonadales	Rhodanobacteraceae	Rhodanobacter
248	SV21	Ti_Rhiz_5	0.0315304	Ti_Rhiz_5	FKDN202654742-1A	NA	NA	nov_2020	Tipple	rhizosphere	NA	4	137928	NA	ITS1-1F†	X201SC20123127-Z01-F001	Bacteria	Proteobacteria	Gammaproteobacteria	Betaproteobacteriales	Burkholderiaceae	Burkholderia-Caballeronia-Paraburkholderia
412	SV30	Ti_Roots_5	0.0306561	Ti_Roots_5	FKDN202654747-1A	NA	NA	nov_2020	Tipple	roots	NA	4	147810	NA	ITS1-1F†	X201SC20123127-Z01-F001	Bacteria	Actinobacteria	Actinobacteria	Frankiales	Acidothermaceae	Acidothermus
243	SV21	Ti_Roots_5	0.0306398	Ti_Roots_5	FKDN202654747-1A	NA	NA	nov_2020	Tipple	roots	NA	4	147810	NA	ITS1-1F†	X201SC20123127-Z01-F001	Bacteria	Proteobacteria	Gammaproteobacteria	Betaproteobacteriales	Burkholderiaceae	Burkholderia-Caballeronia-Paraburkholderia
246	SV21	Ti_Rhiz_6	0.0305588	Ti_Rhiz_6	FKDN202654743-1A	NA	NA	nov_2020	Tipple	rhizosphere	NA	5	163472	NA	ITS1-1F†	X201SC20123127-Z01-F001	Bacteria	Proteobacteria	Gammaproteobacteria	Betaproteobacteriales	Burkholderiaceae	Burkholderia-Caballeronia-Paraburkholderia
228	SV21	Ti_Rhiz_1	0.030403	Ti_Rhiz_1	FKDN202654739-1A	NA	NA	nov_2020	Tipple	rhizosphere	NA	1	140148	NA	ITS1-1F†	X201SC20123127-Z01-F001	Bacteria	Proteobacteria	Gammaproteobacteria	Betaproteobacteriales	Burkholderiaceae	Burkholderia-Caballeronia-Paraburkholderia
679	SV7	Ti_Rhiz_1	0.0302626	Ti_Rhiz_1	FKDN202654739-1A	NA	NA	nov_2020	Tipple	rhizosphere	NA	1	140148	NA	ITS1-1F†	X201SC20123127-Z01-F001	Bacteria	Proteobacteria	Alphaproteobacteria	Rhizobiales	Devosiaceae	Devosia
240	SV21	Ti_Rhiz_2	0.0290445	Ti_Rhiz_2	FKDN202654740-1A	NA	NA	nov_2020	Tipple	rhizosphere	NA	2	145607	NA	ITS1-1F†	X201SC20123127-Z01-F001	Bacteria	Proteobacteria	Gammaproteobacteria	Betaproteobacteriales	Burkholderiaceae	Burkholderia-Caballeronia-Paraburkholderia
387	SV3	Ti_Rhiz_2	0.0281073	Ti_Rhiz_2	FKDN202654740-1A	NA	NA	nov_2020	Tipple	rhizosphere	NA	2	145607	NA	ITS1-1F†	X201SC20123127-Z01-F001	Bacteria	Proteobacteria	Gammaproteobacteria	Betaproteobacteriales	Burkholderiaceae	Massilia
455	SV4	Ti_Rhiz_4	0.0279711	Ti_Rhiz_4	FKDN202654741-1A	NA	NA	nov_2020	Tipple	rhizosphere	NA	3	155460	NA	ITS1-1F†	X201SC20123127-Z01-F001	Bacteria	Proteobacteria	Gammaproteobacteria	Pseudomonadales	Pseudomonadaceae	Pseudomonas
675	SV6	Ti_Roots_6	0.0278069	Ti_Roots_6	FKDN202654748-1A	NA	NA	nov_2020	Tipple	roots	NA	5	132836	NA	ITS1-1F†	X201SC20123127-Z01-F001	Bacteria	Actinobacteria	Actinobacteria	Micrococcales	Micrococcaceae	Pseudarthrobacter
410	SV30	Ti_Roots_2	0.0277931	Ti_Roots_2	FKDN202654745-1A	NA	NA	nov_2020	Tipple	roots	NA	2	166122	NA	ITS1-1F†	X201SC20123127-Z01-F001	Bacteria	Actinobacteria	Actinobacteria	Frankiales	Acidothermaceae	Acidothermus
282	SV23	Ti_Rhiz_1	0.0274841	Ti_Rhiz_1	FKDN202654739-1A	NA	NA	nov_2020	Tipple	rhizosphere	NA	1	140148	NA	ITS1-1F†	X201SC20123127-Z01-F001	Bacteria	Proteobacteria	Alphaproteobacteria	Caulobacterales	Caulobacteraceae	Asticcacaulis
293	SV23	Ti_Roots_6	0.0266553	Ti_Roots_6	FKDN202654748-1A	NA	NA	nov_2020	Tipple	roots	NA	5	132836	NA	ITS1-1F†	X201SC20123127-Z01-F001	Bacteria	Proteobacteria	Alphaproteobacteria	Caulobacterales	Caulobacteraceae	Asticcacaulis
684	SV7	Ti_Roots_5	0.0264279	Ti_Roots_5	FKDN202654747-1A	NA	NA	nov_2020	Tipple	roots	NA	4	147810	NA	ITS1-1F†	X201SC20123127-Z01-F001	Bacteria	Proteobacteria	Alphaproteobacteria	Rhizobiales	Devosiaceae	Devosia
435	SV37	Ti_Rhiz_5	0.0262704	Ti_Rhiz_5	FKDN202654742-1A	NA	NA	nov_2020	Tipple	rhizosphere	NA	4	137928	NA	ITS1-1F†	X201SC20123127-Z01-F001	Bacteria	Actinobacteria	Thermoleophilia	Solirubrobacterales	Solirubrobacteraceae	Conexibacter
441	SV37	Ti_Rhiz_4	0.0262035	Ti_Rhiz_4	FKDN202654741-1A	NA	NA	nov_2020	Tipple	rhizosphere	NA	3	155460	NA	ITS1-1F†	X201SC20123127-Z01-F001	Bacteria	Actinobacteria	Thermoleophilia	Solirubrobacterales	Solirubrobacteraceae	Conexibacter
695	SV7	Ti_Rhiz_6	0.0259858	Ti_Rhiz_6	FKDN202654743-1A	NA	NA	nov_2020	Tipple	rhizosphere	NA	5	163472	NA	ITS1-1F†	X201SC20123127-Z01-F001	Bacteria	Proteobacteria	Alphaproteobacteria	Rhizobiales	Devosiaceae	Devosia
423	SV30	Ti_Rhiz_2	0.02587	Ti_Rhiz_2	FKDN202654740-1A	NA	NA	nov_2020	Tipple	rhizosphere	NA	2	145607	NA	ITS1-1F†	X201SC20123127-Z01-F001	Bacteria	Actinobacteria	Actinobacteria	Frankiales	Acidothermaceae	Acidothermus
292	SV23	Ti_Rhiz_6	0.0253446	Ti_Rhiz_6	FKDN202654743-1A	NA	NA	nov_2020	Tipple	rhizosphere	NA	5	163472	NA	ITS1-1F†	X201SC20123127-Z01-F001	Bacteria	Proteobacteria	Alphaproteobacteria	Caulobacterales	Caulobacteraceae	Asticcacaulis
697	SV7	Ti_Rhiz_4	0.0253297	Ti_Rhiz_4	FKDN202654741-1A	NA	NA	nov_2020	Tipple	rhizosphere	NA	3	155460	NA	ITS1-1F†	X201SC20123127-Z01-F001	Bacteria	Proteobacteria	Alphaproteobacteria	Rhizobiales	Devosiaceae	Devosia
399	SV3	Ti_Roots_1	0.0252303	Ti_Roots_1	FKDN202654744-1A	NA	NA	nov_2020	Tipple	roots	NA	1	138221	NA	ITS1-1F†	X201SC20123127-Z01-F001	Bacteria	Proteobacteria	Gammaproteobacteria	Betaproteobacteriales	Burkholderiaceae	Massilia
241	SV21	Ti_Roots_2	0.0250494	Ti_Roots_2	FKDN202654745-1A	NA	NA	nov_2020	Tipple	roots	NA	2	166122	NA	ITS1-1F†	X201SC20123127-Z01-F001	Bacteria	Proteobacteria	Gammaproteobacteria	Betaproteobacteriales	Burkholderiaceae	Burkholderia-Caballeronia-Paraburkholderia
424	SV30	Ti_Rhiz_6	0.0248732	Ti_Rhiz_6	FKDN202654743-1A	NA	NA	nov_2020	Tipple	rhizosphere	NA	5	163472	NA	ITS1-1F†	X201SC20123127-Z01-F001	Bacteria	Actinobacteria	Actinobacteria	Frankiales	Acidothermaceae	Acidothermus
23	SV10	Ti_Roots_5	0.0247986	Ti_Roots_5	FKDN202654747-1A	NA	NA	nov_2020	Tipple	roots	NA	4	147810	NA	ITS1-1F†	X201SC20123127-Z01-F001	Bacteria	Proteobacteria	Alphaproteobacteria	Rhizobiales	Rhizobiaceae	Allorhizobium-Neorhizobium-Pararhizobium-Rhizobium
716	SV8	Ti_Rhiz_4	0.0243354	Ti_Rhiz_4	FKDN202654741-1A	NA	NA	nov_2020	Tipple	rhizosphere	NA	3	155460	NA	ITS1-1F†	X201SC20123127-Z01-F001	Bacteria	Proteobacteria	Alphaproteobacteria	Rhizobiales	Xanthobacteraceae	Pseudolabrys
749	SV9	Ti_Rhiz_6	0.0242886	Ti_Rhiz_6	FKDN202654743-1A	NA	NA	nov_2020	Tipple	rhizosphere	NA	5	163472	NA	ITS1-1F†	X201SC20123127-Z01-F001	Bacteria	Proteobacteria	Gammaproteobacteria	Xanthomonadales	Rhodanobacteraceae	Rhodanobacter
699	SV7	Ti_Rhiz_5	0.0242511	Ti_Rhiz_5	FKDN202654742-1A	NA	NA	nov_2020	Tipple	rhizosphere	NA	4	137928	NA	ITS1-1F†	X201SC20123127-Z01-F001	Bacteria	Proteobacteria	Alphaproteobacteria	Rhizobiales	Devosiaceae	Devosia
693	SV7	Ti_Rhiz_2	0.0242474	Ti_Rhiz_2	FKDN202654740-1A	NA	NA	nov_2020	Tipple	rhizosphere	NA	2	145607	NA	ITS1-1F†	X201SC20123127-Z01-F001	Bacteria	Proteobacteria	Alphaproteobacteria	Rhizobiales	Devosiaceae	Devosia
298	SV23	Ti_Roots_5	0.0239513	Ti_Roots_5	FKDN202654747-1A	NA	NA	nov_2020	Tipple	roots	NA	4	147810	NA	ITS1-1F†	X201SC20123127-Z01-F001	Bacteria	Proteobacteria	Alphaproteobacteria	Caulobacterales	Caulobacteraceae	Asticcacaulis
617	SV5	Ti_Roots_2	0.0234388	Ti_Roots_2	FKDN202654745-1A	NA	NA	nov_2020	Tipple	roots	NA	2	166122	NA	ITS1-1F†	X201SC20123127-Z01-F001	Bacteria	Proteobacteria	Gammaproteobacteria	Enterobacteriales	Enterobacteriaceae	Klebsiella
247	SV21	Ti_Roots_1	0.0233467	Ti_Roots_1	FKDN202654744-1A	NA	NA	nov_2020	Tipple	roots	NA	1	138221	NA	ITS1-1F†	X201SC20123127-Z01-F001	Bacteria	Proteobacteria	Gammaproteobacteria	Betaproteobacteriales	Burkholderiaceae	Burkholderia-Caballeronia-Paraburkholderia
670	SV6	Ti_Rhiz_6	0.0233174	Ti_Rhiz_6	FKDN202654743-1A	NA	NA	nov_2020	Tipple	rhizosphere	NA	5	163472	NA	ITS1-1F†	X201SC20123127-Z01-F001	Bacteria	Actinobacteria	Actinobacteria	Micrococcales	Micrococcaceae	Pseudarthrobacter
735	SV9	Ti_Roots_2	0.0230746	Ti_Roots_2	FKDN202654745-1A	NA	NA	nov_2020	Tipple	roots	NA	2	166122	NA	ITS1-1F†	X201SC20123127-Z01-F001	Bacteria	Proteobacteria	Gammaproteobacteria	Xanthomonadales	Rhodanobacteraceae	Rhodanobacter
294	SV23	Ti_Rhiz_5	0.0228524	Ti_Rhiz_5	FKDN202654742-1A	NA	NA	nov_2020	Tipple	rhizosphere	NA	4	137928	NA	ITS1-1F†	X201SC20123127-Z01-F001	Bacteria	Proteobacteria	Alphaproteobacteria	Caulobacterales	Caulobacteraceae	Asticcacaulis
244	SV21	Ti_Roots_4	0.0227974	Ti_Roots_4	FKDN202654746-1A	NA	NA	nov_2020	Tipple	roots	NA	3	151349	NA	ITS1-1F†	X201SC20123127-Z01-F001	Bacteria	Proteobacteria	Gammaproteobacteria	Betaproteobacteriales	Burkholderiaceae	Burkholderia-Caballeronia-Paraburkholderia
714	SV8	Ti_Rhiz_5	0.0227539	Ti_Rhiz_5	FKDN202654742-1A	NA	NA	nov_2020	Tipple	rhizosphere	NA	4	137928	NA	ITS1-1F†	X201SC20123127-Z01-F001	Bacteria	Proteobacteria	Alphaproteobacteria	Rhizobiales	Xanthobacteraceae	Pseudolabrys
22	SV10	Ti_Roots_2	0.0225566	Ti_Roots_2	FKDN202654745-1A	NA	NA	nov_2020	Tipple	roots	NA	2	166122	NA	ITS1-1F†	X201SC20123127-Z01-F001	Bacteria	Proteobacteria	Alphaproteobacteria	Rhizobiales	Rhizobiaceae	Allorhizobium-Neorhizobium-Pararhizobium-Rhizobium
470	SV4	Ti_Roots_4	0.0223501	Ti_Roots_4	FKDN202654746-1A	NA	NA	nov_2020	Tipple	roots	NA	3	151349	NA	ITS1-1F†	X201SC20123127-Z01-F001	Bacteria	Proteobacteria	Gammaproteobacteria	Pseudomonadales	Pseudomonadaceae	Pseudomonas
250	SV21	Ti_Rhiz_4	0.0221158	Ti_Rhiz_4	FKDN202654741-1A	NA	NA	nov_2020	Tipple	rhizosphere	NA	3	155460	NA	ITS1-1F†	X201SC20123127-Z01-F001	Bacteria	Proteobacteria	Gammaproteobacteria	Betaproteobacteriales	Burkholderiaceae	Burkholderia-Caballeronia-Paraburkholderia
117	SV12	Ti_Roots_5	0.0217599	Ti_Roots_5	FKDN202654747-1A	NA	NA	nov_2020	Tipple	roots	NA	4	147810	NA	ITS1-1F†	X201SC20123127-Z01-F001	Bacteria	Proteobacteria	Gammaproteobacteria	Betaproteobacteriales	Burkholderiaceae	Sphaerotilus
738	SV9	Ti_Roots_4	0.0215261	Ti_Roots_4	FKDN202654746-1A	NA	NA	nov_2020	Tipple	roots	NA	3	151349	NA	ITS1-1F†	X201SC20123127-Z01-F001	Bacteria	Proteobacteria	Gammaproteobacteria	Xanthomonadales	Rhodanobacteraceae	Rhodanobacter
736	SV9	Ti_Roots_6	0.021449	Ti_Roots_6	FKDN202654748-1A	NA	NA	nov_2020	Tipple	roots	NA	5	132836	NA	ITS1-1F†	X201SC20123127-Z01-F001	Bacteria	Proteobacteria	Gammaproteobacteria	Xanthomonadales	Rhodanobacteraceae	Rhodanobacter
286	SV23	Ti_Rhiz_2	0.0214357	Ti_Rhiz_2	FKDN202654740-1A	NA	NA	nov_2020	Tipple	rhizosphere	NA	2	145607	NA	ITS1-1F†	X201SC20123127-Z01-F001	Bacteria	Proteobacteria	Alphaproteobacteria	Caulobacterales	Caulobacteraceae	Asticcacaulis
438	SV37	Ti_Rhiz_1	0.0212249	Ti_Rhiz_1	FKDN202654739-1A	NA	NA	nov_2020	Tipple	rhizosphere	NA	1	140148	NA	ITS1-1F†	X201SC20123127-Z01-F001	Bacteria	Actinobacteria	Thermoleophilia	Solirubrobacterales	Solirubrobacteraceae	Conexibacter
4	SV10	Ti_Rhiz_6	0.0210451	Ti_Rhiz_6	FKDN202654743-1A	NA	NA	nov_2020	Tipple	rhizosphere	NA	5	163472	NA	ITS1-1F†	X201SC20123127-Z01-F001	Bacteria	Proteobacteria	Alphaproteobacteria	Rhizobiales	Rhizobiaceae	Allorhizobium-Neorhizobium-Pararhizobium-Rhizobium
296	SV23	Ti_Roots_2	0.0209622	Ti_Roots_2	FKDN202654745-1A	NA	NA	nov_2020	Tipple	roots	NA	2	166122	NA	ITS1-1F†	X201SC20123127-Z01-F001	Bacteria	Proteobacteria	Alphaproteobacteria	Caulobacterales	Caulobacteraceae	Asticcacaulis
411	SV30	Ti_Roots_6	0.0207612	Ti_Roots_6	FKDN202654748-1A	NA	NA	nov_2020	Tipple	roots	NA	5	132836	NA	ITS1-1F†	X201SC20123127-Z01-F001	Bacteria	Actinobacteria	Actinobacteria	Frankiales	Acidothermaceae	Acidothermus
700	SV7	Ti_Roots_6	0.0206892	Ti_Roots_6	FKDN202654748-1A	NA	NA	nov_2020	Tipple	roots	NA	5	132836	NA	ITS1-1F†	X201SC20123127-Z01-F001	Bacteria	Proteobacteria	Alphaproteobacteria	Rhizobiales	Devosiaceae	Devosia
707	SV8	Ti_Rhiz_2	0.0204078	Ti_Rhiz_2	FKDN202654740-1A	NA	NA	nov_2020	Tipple	rhizosphere	NA	2	145607	NA	ITS1-1F†	X201SC20123127-Z01-F001	Bacteria	Proteobacteria	Alphaproteobacteria	Rhizobiales	Xanthobacteraceae	Pseudolabrys
299	SV23	Ti_Rhiz_4	0.0200066	Ti_Rhiz_4	FKDN202654741-1A	NA	NA	nov_2020	Tipple	rhizosphere	NA	3	155460	NA	ITS1-1F†	X201SC20123127-Z01-F001	Bacteria	Proteobacteria	Alphaproteobacteria	Caulobacterales	Caulobacteraceae	Asticcacaulis
437	SV37	Ti_Rhiz_2	0.0193294	Ti_Rhiz_2	FKDN202654740-1A	NA	NA	nov_2020	Tipple	rhizosphere	NA	2	145607	NA	ITS1-1F†	X201SC20123127-Z01-F001	Bacteria	Actinobacteria	Thermoleophilia	Solirubrobacterales	Solirubrobacteraceae	Conexibacter
18	SV10	Ti_Roots_1	0.0192573	Ti_Roots_1	FKDN202654744-1A	NA	NA	nov_2020	Tipple	roots	NA	1	138221	NA	ITS1-1F†	X201SC20123127-Z01-F001	Bacteria	Proteobacteria	Alphaproteobacteria	Rhizobiales	Rhizobiaceae	Allorhizobium-Neorhizobium-Pararhizobium-Rhizobium
712	SV8	Ti_Rhiz_1	0.0190483	Ti_Rhiz_1	FKDN202654739-1A	NA	NA	nov_2020	Tipple	rhizosphere	NA	1	140148	NA	ITS1-1F†	X201SC20123127-Z01-F001	Bacteria	Proteobacteria	Alphaproteobacteria	Rhizobiales	Xanthobacteraceae	Pseudolabrys
429	SV37	Ti_Rhiz_6	0.0189708	Ti_Rhiz_6	FKDN202654743-1A	NA	NA	nov_2020	Tipple	rhizosphere	NA	5	163472	NA	ITS1-1F†	X201SC20123127-Z01-F001	Bacteria	Actinobacteria	Thermoleophilia	Solirubrobacterales	Solirubrobacteraceae	Conexibacter
696	SV7	Ti_Roots_2	0.0189388	Ti_Roots_2	FKDN202654745-1A	NA	NA	nov_2020	Tipple	roots	NA	2	166122	NA	ITS1-1F†	X201SC20123127-Z01-F001	Bacteria	Proteobacteria	Alphaproteobacteria	Rhizobiales	Devosiaceae	Devosia
745	SV9	Ti_Roots_1	0.0186377	Ti_Roots_1	FKDN202654744-1A	NA	NA	nov_2020	Tipple	roots	NA	1	138221	NA	ITS1-1F†	X201SC20123127-Z01-F001	Bacteria	Proteobacteria	Gammaproteobacteria	Xanthomonadales	Rhodanobacteraceae	Rhodanobacter
366	SV28	Ti_Rhiz_4	0.018008	Ti_Rhiz_4	FKDN202654741-1A	NA	NA	nov_2020	Tipple	rhizosphere	NA	3	155460	NA	ITS1-1F†	X201SC20123127-Z01-F001	Bacteria	Acidobacteria	Acidobacteriia	Acidobacteriales	Acidobacteriaceae_(Subgroup_1)	Granulicella
295	SV23	Ti_Roots_4	0.0179868	Ti_Roots_4	FKDN202654746-1A	NA	NA	nov_2020	Tipple	roots	NA	3	151349	NA	ITS1-1F†	X201SC20123127-Z01-F001	Bacteria	Proteobacteria	Alphaproteobacteria	Caulobacterales	Caulobacteraceae	Asticcacaulis
708	SV8	Ti_Rhiz_6	0.017943	Ti_Rhiz_6	FKDN202654743-1A	NA	NA	nov_2020	Tipple	rhizosphere	NA	5	163472	NA	ITS1-1F†	X201SC20123127-Z01-F001	Bacteria	Proteobacteria	Alphaproteobacteria	Rhizobiales	Xanthobacteraceae	Pseudolabrys
624	SV5	Ti_Rhiz_6	0.017877	Ti_Rhiz_6	FKDN202654743-1A	NA	NA	nov_2020	Tipple	rhizosphere	NA	5	163472	NA	ITS1-1F†	X201SC20123127-Z01-F001	Bacteria	Proteobacteria	Gammaproteobacteria	Enterobacteriales	Enterobacteriaceae	Klebsiella
364	SV28	Ti_Rhiz_5	0.0177993	Ti_Rhiz_5	FKDN202654742-1A	NA	NA	nov_2020	Tipple	rhizosphere	NA	4	137928	NA	ITS1-1F†	X201SC20123127-Z01-F001	Bacteria	Acidobacteria	Acidobacteriia	Acidobacteriales	Acidobacteriaceae_(Subgroup_1)	Granulicella
450	SV37	Ti_Roots_6	0.0175382	Ti_Roots_6	FKDN202654748-1A	NA	NA	nov_2020	Tipple	roots	NA	5	132836	NA	ITS1-1F†	X201SC20123127-Z01-F001	Bacteria	Actinobacteria	Thermoleophilia	Solirubrobacterales	Solirubrobacteraceae	Conexibacter
666	SV6	Ti_Rhiz_1	0.0174333	Ti_Rhiz_1	FKDN202654739-1A	NA	NA	nov_2020	Tipple	rhizosphere	NA	1	140148	NA	ITS1-1F†	X201SC20123127-Z01-F001	Bacteria	Actinobacteria	Actinobacteria	Micrococcales	Micrococcaceae	Pseudarthrobacter
543	SV47	Ti_Roots_5	0.0174177	Ti_Roots_5	FKDN202654747-1A	NA	NA	nov_2020	Tipple	roots	NA	4	147810	NA	ITS1-1F†	X201SC20123127-Z01-F001	Bacteria	Actinobacteria	Actinobacteria	Streptomycetales	Streptomycetaceae	Streptomyces
13	SV10	Ti_Rhiz_1	0.0173732	Ti_Rhiz_1	FKDN202654739-1A	NA	NA	nov_2020	Tipple	rhizosphere	NA	1	140148	NA	ITS1-1F†	X201SC20123127-Z01-F001	Bacteria	Proteobacteria	Alphaproteobacteria	Rhizobiales	Rhizobiaceae	Allorhizobium-Neorhizobium-Pararhizobium-Rhizobium
447	SV37	Ti_Roots_2	0.0173686	Ti_Roots_2	FKDN202654745-1A	NA	NA	nov_2020	Tipple	roots	NA	2	166122	NA	ITS1-1F†	X201SC20123127-Z01-F001	Bacteria	Actinobacteria	Thermoleophilia	Solirubrobacterales	Solirubrobacteraceae	Conexibacter
698	SV7	Ti_Roots_1	0.0172828	Ti_Roots_1	FKDN202654744-1A	NA	NA	nov_2020	Tipple	roots	NA	1	138221	NA	ITS1-1F†	X201SC20123127-Z01-F001	Bacteria	Proteobacteria	Alphaproteobacteria	Rhizobiales	Devosiaceae	Devosia
413	SV30	Ti_Roots_4	0.0172726	Ti_Roots_4	FKDN202654746-1A	NA	NA	nov_2020	Tipple	roots	NA	3	151349	NA	ITS1-1F†	X201SC20123127-Z01-F001	Bacteria	Actinobacteria	Actinobacteria	Frankiales	Acidothermaceae	Acidothermus
12	SV10	Ti_Rhiz_2	0.0172231	Ti_Rhiz_2	FKDN202654740-1A	NA	NA	nov_2020	Tipple	rhizosphere	NA	2	145607	NA	ITS1-1F†	X201SC20123127-Z01-F001	Bacteria	Proteobacteria	Alphaproteobacteria	Rhizobiales	Rhizobiaceae	Allorhizobium-Neorhizobium-Pararhizobium-Rhizobium
10	SV10	Ti_Rhiz_5	0.017031	Ti_Rhiz_5	FKDN202654742-1A	NA	NA	nov_2020	Tipple	rhizosphere	NA	4	137928	NA	ITS1-1F†	X201SC20123127-Z01-F001	Bacteria	Proteobacteria	Alphaproteobacteria	Rhizobiales	Rhizobiaceae	Allorhizobium-Neorhizobium-Pararhizobium-Rhizobium
605	SV5	Ti_Roots_5	0.01688	Ti_Roots_5	FKDN202654747-1A	NA	NA	nov_2020	Tipple	roots	NA	4	147810	NA	ITS1-1F†	X201SC20123127-Z01-F001	Bacteria	Proteobacteria	Gammaproteobacteria	Enterobacteriales	Enterobacteriaceae	Klebsiella
723	SV8	Ti_Roots_6	0.0166185	Ti_Roots_6	FKDN202654748-1A	NA	NA	nov_2020	Tipple	roots	NA	5	132836	NA	ITS1-1F†	X201SC20123127-Z01-F001	Bacteria	Proteobacteria	Alphaproteobacteria	Rhizobiales	Xanthobacteraceae	Pseudolabrys
448	SV37	Ti_Roots_5	0.0165623	Ti_Roots_5	FKDN202654747-1A	NA	NA	nov_2020	Tipple	roots	NA	4	147810	NA	ITS1-1F†	X201SC20123127-Z01-F001	Bacteria	Actinobacteria	Thermoleophilia	Solirubrobacterales	Solirubrobacteraceae	Conexibacter
300	SV23	Ti_Roots_1	0.0165145	Ti_Roots_1	FKDN202654744-1A	NA	NA	nov_2020	Tipple	roots	NA	1	138221	NA	ITS1-1F†	X201SC20123127-Z01-F001	Bacteria	Proteobacteria	Alphaproteobacteria	Caulobacterales	Caulobacteraceae	Asticcacaulis
547	SV47	Ti_Roots_1	0.0164567	Ti_Roots_1	FKDN202654744-1A	NA	NA	nov_2020	Tipple	roots	NA	1	138221	NA	ITS1-1F†	X201SC20123127-Z01-F001	Bacteria	Actinobacteria	Actinobacteria	Streptomycetales	Streptomycetaceae	Streptomyces
674	SV6	Ti_Rhiz_5	0.0164005	Ti_Rhiz_5	FKDN202654742-1A	NA	NA	nov_2020	Tipple	rhizosphere	NA	4	137928	NA	ITS1-1F†	X201SC20123127-Z01-F001	Bacteria	Actinobacteria	Actinobacteria	Micrococcales	Micrococcaceae	Pseudarthrobacter
672	SV6	Ti_Rhiz_4	0.0162604	Ti_Rhiz_4	FKDN202654741-1A	NA	NA	nov_2020	Tipple	rhizosphere	NA	3	155460	NA	ITS1-1F†	X201SC20123127-Z01-F001	Bacteria	Actinobacteria	Actinobacteria	Micrococcales	Micrococcaceae	Pseudarthrobacter
690	SV7	Ti_Roots_4	0.016174	Ti_Roots_4	FKDN202654746-1A	NA	NA	nov_2020	Tipple	roots	NA	3	151349	NA	ITS1-1F†	X201SC20123127-Z01-F001	Bacteria	Proteobacteria	Alphaproteobacteria	Rhizobiales	Devosiaceae	Devosia
621	SV5	Ti_Rhiz_5	0.0160558	Ti_Rhiz_5	FKDN202654742-1A	NA	NA	nov_2020	Tipple	rhizosphere	NA	4	137928	NA	ITS1-1F†	X201SC20123127-Z01-F001	Bacteria	Proteobacteria	Gammaproteobacteria	Enterobacteriales	Enterobacteriaceae	Klebsiella
362	SV28	Ti_Rhiz_1	0.0155777	Ti_Rhiz_1	FKDN202654739-1A	NA	NA	nov_2020	Tipple	rhizosphere	NA	1	140148	NA	ITS1-1F†	X201SC20123127-Z01-F001	Bacteria	Acidobacteria	Acidobacteriia	Acidobacteriales	Acidobacteriaceae_(Subgroup_1)	Granulicella
420	SV30	Ti_Roots_1	0.0146474	Ti_Roots_1	FKDN202654744-1A	NA	NA	nov_2020	Tipple	roots	NA	1	138221	NA	ITS1-1F†	X201SC20123127-Z01-F001	Bacteria	Actinobacteria	Actinobacteria	Frankiales	Acidothermaceae	Acidothermus
449	SV37	Ti_Roots_4	0.014573	Ti_Roots_4	FKDN202654746-1A	NA	NA	nov_2020	Tipple	roots	NA	3	151349	NA	ITS1-1F†	X201SC20123127-Z01-F001	Bacteria	Actinobacteria	Thermoleophilia	Solirubrobacterales	Solirubrobacteraceae	Conexibacter
162	SV136	Ti_Rhiz_4	0.014553	Ti_Rhiz_4	FKDN202654741-1A	NA	NA	nov_2020	Tipple	rhizosphere	NA	3	155460	NA	ITS1-1F†	X201SC20123127-Z01-F001	Bacteria	Acidobacteria	Acidobacteriia	Acidobacteriales	Acidobacteriaceae_(Subgroup_1)	Occallatibacter
541	SV47	Ti_Roots_2	0.0145197	Ti_Roots_2	FKDN202654745-1A	NA	NA	nov_2020	Tipple	roots	NA	2	166122	NA	ITS1-1F†	X201SC20123127-Z01-F001	Bacteria	Actinobacteria	Actinobacteria	Streptomycetales	Streptomycetaceae	Streptomyces
724	SV8	Ti_Roots_5	0.0141753	Ti_Roots_5	FKDN202654747-1A	NA	NA	nov_2020	Tipple	roots	NA	4	147810	NA	ITS1-1F†	X201SC20123127-Z01-F001	Bacteria	Proteobacteria	Alphaproteobacteria	Rhizobiales	Xanthobacteraceae	Pseudolabrys
358	SV28	Ti_Rhiz_6	0.0141621	Ti_Rhiz_6	FKDN202654743-1A	NA	NA	nov_2020	Tipple	rhizosphere	NA	5	163472	NA	ITS1-1F†	X201SC20123127-Z01-F001	Bacteria	Acidobacteria	Acidobacteriia	Acidobacteriales	Acidobacteriaceae_(Subgroup_1)	Granulicella
546	SV47	Ti_Rhiz_6	0.0140018	Ti_Rhiz_6	FKDN202654743-1A	NA	NA	nov_2020	Tipple	rhizosphere	NA	5	163472	NA	ITS1-1F†	X201SC20123127-Z01-F001	Bacteria	Actinobacteria	Actinobacteria	Streptomycetales	Streptomycetaceae	Streptomyces
607	SV5	Ti_Rhiz_2	0.0139781	Ti_Rhiz_2	FKDN202654740-1A	NA	NA	nov_2020	Tipple	rhizosphere	NA	2	145607	NA	ITS1-1F†	X201SC20123127-Z01-F001	Bacteria	Proteobacteria	Gammaproteobacteria	Enterobacteriales	Enterobacteriaceae	Klebsiella
151	SV136	Ti_Rhiz_1	0.0138825	Ti_Rhiz_1	FKDN202654739-1A	NA	NA	nov_2020	Tipple	rhizosphere	NA	1	140148	NA	ITS1-1F†	X201SC20123127-Z01-F001	Bacteria	Acidobacteria	Acidobacteriia	Acidobacteriales	Acidobacteriaceae_(Subgroup_1)	Occallatibacter
152	SV136	Ti_Rhiz_5	0.01381	Ti_Rhiz_5	FKDN202654742-1A	NA	NA	nov_2020	Tipple	rhizosphere	NA	4	137928	NA	ITS1-1F†	X201SC20123127-Z01-F001	Bacteria	Acidobacteria	Acidobacteriia	Acidobacteriales	Acidobacteriaceae_(Subgroup_1)	Occallatibacter
16	SV10	Ti_Rhiz_4	0.0135888	Ti_Rhiz_4	FKDN202654741-1A	NA	NA	nov_2020	Tipple	rhizosphere	NA	3	155460	NA	ITS1-1F†	X201SC20123127-Z01-F001	Bacteria	Proteobacteria	Alphaproteobacteria	Rhizobiales	Rhizobiaceae	Allorhizobium-Neorhizobium-Pararhizobium-Rhizobium
622	SV5	Ti_Rhiz_4	0.0135286	Ti_Rhiz_4	FKDN202654741-1A	NA	NA	nov_2020	Tipple	rhizosphere	NA	3	155460	NA	ITS1-1F†	X201SC20123127-Z01-F001	Bacteria	Proteobacteria	Gammaproteobacteria	Enterobacteriales	Enterobacteriaceae	Klebsiella
24	SV10	Ti_Roots_4	0.0134822	Ti_Roots_4	FKDN202654746-1A	NA	NA	nov_2020	Tipple	roots	NA	3	151349	NA	ITS1-1F†	X201SC20123127-Z01-F001	Bacteria	Proteobacteria	Alphaproteobacteria	Rhizobiales	Rhizobiaceae	Allorhizobium-Neorhizobium-Pararhizobium-Rhizobium
659	SV6	Ti_Roots_5	0.0134747	Ti_Roots_5	FKDN202654747-1A	NA	NA	nov_2020	Tipple	roots	NA	4	147810	NA	ITS1-1F†	X201SC20123127-Z01-F001	Bacteria	Actinobacteria	Actinobacteria	Micrococcales	Micrococcaceae	Pseudarthrobacter
357	SV28	Ti_Rhiz_2	0.0133935	Ti_Rhiz_2	FKDN202654740-1A	NA	NA	nov_2020	Tipple	rhizosphere	NA	2	145607	NA	ITS1-1F†	X201SC20123127-Z01-F001	Bacteria	Acidobacteria	Acidobacteriia	Acidobacteriales	Acidobacteriaceae_(Subgroup_1)	Granulicella
374	SV28	Ti_Roots_5	0.013385	Ti_Roots_5	FKDN202654747-1A	NA	NA	nov_2020	Tipple	roots	NA	4	147810	NA	ITS1-1F†	X201SC20123127-Z01-F001	Bacteria	Acidobacteria	Acidobacteriia	Acidobacteriales	Acidobacteriaceae_(Subgroup_1)	Granulicella
721	SV8	Ti_Roots_4	0.0131997	Ti_Roots_4	FKDN202654746-1A	NA	NA	nov_2020	Tipple	roots	NA	3	151349	NA	ITS1-1F†	X201SC20123127-Z01-F001	Bacteria	Proteobacteria	Alphaproteobacteria	Rhizobiales	Xanthobacteraceae	Pseudolabrys
158	SV136	Ti_Rhiz_2	0.013071	Ti_Rhiz_2	FKDN202654740-1A	NA	NA	nov_2020	Tipple	rhizosphere	NA	2	145607	NA	ITS1-1F†	X201SC20123127-Z01-F001	Bacteria	Acidobacteria	Acidobacteriia	Acidobacteriales	Acidobacteriaceae_(Subgroup_1)	Occallatibacter
671	SV6	Ti_Roots_2	0.0130305	Ti_Roots_2	FKDN202654745-1A	NA	NA	nov_2020	Tipple	roots	NA	2	166122	NA	ITS1-1F†	X201SC20123127-Z01-F001	Bacteria	Actinobacteria	Actinobacteria	Micrococcales	Micrococcaceae	Pseudarthrobacter
169	SV136	Ti_Roots_5	0.0126844	Ti_Roots_5	FKDN202654747-1A	NA	NA	nov_2020	Tipple	roots	NA	4	147810	NA	ITS1-1F†	X201SC20123127-Z01-F001	Bacteria	Acidobacteria	Acidobacteriia	Acidobacteriales	Acidobacteriaceae_(Subgroup_1)	Occallatibacter
112	SV12	Ti_Roots_6	0.0125799	Ti_Roots_6	FKDN202654748-1A	NA	NA	nov_2020	Tipple	roots	NA	5	132836	NA	ITS1-1F†	X201SC20123127-Z01-F001	Bacteria	Proteobacteria	Gammaproteobacteria	Betaproteobacteriales	Burkholderiaceae	Sphaerotilus
212	SV16	Ti_Rhiz_4	0.0123334	Ti_Rhiz_4	FKDN202654741-1A	NA	NA	nov_2020	Tipple	rhizosphere	NA	3	155460	NA	ITS1-1F†	X201SC20123127-Z01-F001	Bacteria	Proteobacteria	Gammaproteobacteria	Xanthomonadales	Xanthomonadaceae	Luteimonas
375	SV28	Ti_Roots_2	0.0123264	Ti_Roots_2	FKDN202654745-1A	NA	NA	nov_2020	Tipple	roots	NA	2	166122	NA	ITS1-1F†	X201SC20123127-Z01-F001	Bacteria	Acidobacteria	Acidobacteriia	Acidobacteriales	Acidobacteriaceae_(Subgroup_1)	Granulicella
542	SV47	Ti_Roots_6	0.012196	Ti_Roots_6	FKDN202654748-1A	NA	NA	nov_2020	Tipple	roots	NA	5	132836	NA	ITS1-1F†	X201SC20123127-Z01-F001	Bacteria	Actinobacteria	Actinobacteria	Streptomycetales	Streptomycetaceae	Streptomyces
155	SV136	Ti_Rhiz_6	0.0118614	Ti_Rhiz_6	FKDN202654743-1A	NA	NA	nov_2020	Tipple	rhizosphere	NA	5	163472	NA	ITS1-1F†	X201SC20123127-Z01-F001	Bacteria	Acidobacteria	Acidobacteriia	Acidobacteriales	Acidobacteriaceae_(Subgroup_1)	Occallatibacter
725	SV8	Ti_Roots_2	0.0118165	Ti_Roots_2	FKDN202654745-1A	NA	NA	nov_2020	Tipple	roots	NA	2	166122	NA	ITS1-1F†	X201SC20123127-Z01-F001	Bacteria	Proteobacteria	Alphaproteobacteria	Rhizobiales	Xanthobacteraceae	Pseudolabrys
498	SV45	Ti_Rhiz_4	0.0117107	Ti_Rhiz_4	FKDN202654741-1A	NA	NA	nov_2020	Tipple	rhizosphere	NA	3	155460	NA	ITS1-1F†	X201SC20123127-Z01-F001	Bacteria	Actinobacteria	Actinobacteria	Corynebacteriales	Mycobacteriaceae	Mycobacterium
181	SV144	Ti_Rhiz_5	0.0116528	Ti_Rhiz_5	FKDN202654742-1A	NA	NA	nov_2020	Tipple	rhizosphere	NA	4	137928	NA	ITS1-1F†	X201SC20123127-Z01-F001	Bacteria	Bacteroidetes	Bacteroidia	Sphingobacteriales	Sphingobacteriaceae	Mucilaginibacter
673	SV6	Ti_Roots_1	0.011632	Ti_Roots_1	FKDN202654744-1A	NA	NA	nov_2020	Tipple	roots	NA	1	138221	NA	ITS1-1F†	X201SC20123127-Z01-F001	Bacteria	Actinobacteria	Actinobacteria	Micrococcales	Micrococcaceae	Pseudarthrobacter
99	SV114	Ti_Roots_5	0.0115928	Ti_Roots_5	FKDN202654747-1A	NA	NA	nov_2020	Tipple	roots	NA	4	147810	NA	ITS1-1F†	X201SC20123127-Z01-F001	Bacteria	Proteobacteria	Gammaproteobacteria	Xanthomonadales	Rhodanobacteraceae	Chujaibacter
218	SV16	Ti_Rhiz_1	0.0115855	Ti_Rhiz_1	FKDN202654739-1A	NA	NA	nov_2020	Tipple	rhizosphere	NA	1	140148	NA	ITS1-1F†	X201SC20123127-Z01-F001	Bacteria	Proteobacteria	Gammaproteobacteria	Xanthomonadales	Xanthomonadaceae	Luteimonas
611	SV5	Ti_Roots_4	0.011434	Ti_Roots_4	FKDN202654746-1A	NA	NA	nov_2020	Tipple	roots	NA	3	151349	NA	ITS1-1F†	X201SC20123127-Z01-F001	Bacteria	Proteobacteria	Gammaproteobacteria	Enterobacteriales	Enterobacteriaceae	Klebsiella
175	SV136	Ti_Roots_2	0.0113633	Ti_Roots_2	FKDN202654745-1A	NA	NA	nov_2020	Tipple	roots	NA	2	166122	NA	ITS1-1F†	X201SC20123127-Z01-F001	Bacteria	Acidobacteria	Acidobacteriia	Acidobacteriales	Acidobacteriaceae_(Subgroup_1)	Occallatibacter
202	SV16	Ti_Rhiz_6	0.0111826	Ti_Rhiz_6	FKDN202654743-1A	NA	NA	nov_2020	Tipple	rhizosphere	NA	5	163472	NA	ITS1-1F†	X201SC20123127-Z01-F001	Bacteria	Proteobacteria	Gammaproteobacteria	Xanthomonadales	Xanthomonadaceae	Luteimonas
544	SV47	Ti_Roots_4	0.0110809	Ti_Roots_4	FKDN202654746-1A	NA	NA	nov_2020	Tipple	roots	NA	3	151349	NA	ITS1-1F†	X201SC20123127-Z01-F001	Bacteria	Actinobacteria	Actinobacteria	Streptomycetales	Streptomycetaceae	Streptomyces
500	SV45	Ti_Rhiz_5	0.0110519	Ti_Rhiz_5	FKDN202654742-1A	NA	NA	nov_2020	Tipple	rhizosphere	NA	4	137928	NA	ITS1-1F†	X201SC20123127-Z01-F001	Bacteria	Actinobacteria	Actinobacteria	Corynebacteriales	Mycobacteriaceae	Mycobacterium
373	SV28	Ti_Roots_6	0.0110444	Ti_Roots_6	FKDN202654748-1A	NA	NA	nov_2020	Tipple	roots	NA	5	132836	NA	ITS1-1F†	X201SC20123127-Z01-F001	Bacteria	Acidobacteria	Acidobacteriia	Acidobacteriales	Acidobacteriaceae_(Subgroup_1)	Granulicella
173	SV136	Ti_Roots_6	0.0110124	Ti_Roots_6	FKDN202654748-1A	NA	NA	nov_2020	Tipple	roots	NA	5	132836	NA	ITS1-1F†	X201SC20123127-Z01-F001	Bacteria	Acidobacteria	Acidobacteriia	Acidobacteriales	Acidobacteriaceae_(Subgroup_1)	Occallatibacter
206	SV16	Ti_Rhiz_5	0.010845	Ti_Rhiz_5	FKDN202654742-1A	NA	NA	nov_2020	Tipple	rhizosphere	NA	4	137928	NA	ITS1-1F†	X201SC20123127-Z01-F001	Bacteria	Proteobacteria	Gammaproteobacteria	Xanthomonadales	Xanthomonadaceae	Luteimonas
494	SV45	Ti_Rhiz_2	0.0108035	Ti_Rhiz_2	FKDN202654740-1A	NA	NA	nov_2020	Tipple	rhizosphere	NA	2	145607	NA	ITS1-1F†	X201SC20123127-Z01-F001	Bacteria	Actinobacteria	Actinobacteria	Corynebacteriales	Mycobacteriaceae	Mycobacterium
131	SV126	Ti_Rhiz_1	0.0106626	Ti_Rhiz_1	FKDN202654739-1A	NA	NA	nov_2020	Tipple	rhizosphere	NA	1	140148	NA	ITS1-1F†	X201SC20123127-Z01-F001	Bacteria	Proteobacteria	Alphaproteobacteria	Caulobacterales	Caulobacteraceae	Caulobacter
540	SV47	Ti_Rhiz_2	0.0106624	Ti_Rhiz_2	FKDN202654740-1A	NA	NA	nov_2020	Tipple	rhizosphere	NA	2	145607	NA	ITS1-1F†	X201SC20123127-Z01-F001	Bacteria	Actinobacteria	Actinobacteria	Streptomycetales	Streptomycetaceae	Streptomyces
220	SV16	Ti_Roots_5	0.0106477	Ti_Roots_5	FKDN202654747-1A	NA	NA	nov_2020	Tipple	roots	NA	4	147810	NA	ITS1-1F†	X201SC20123127-Z01-F001	Bacteria	Proteobacteria	Gammaproteobacteria	Xanthomonadales	Xanthomonadaceae	Luteimonas
346	SV25	Ti_Rhiz_4	0.0104954	Ti_Rhiz_4	FKDN202654741-1A	NA	NA	nov_2020	Tipple	rhizosphere	NA	3	155460	NA	ITS1-1F†	X201SC20123127-Z01-F001	Bacteria	Proteobacteria	Alphaproteobacteria	Rhizobiales	Xanthobacteraceae	Rhodoplanes
722	SV8	Ti_Roots_1	0.0102359	Ti_Roots_1	FKDN202654744-1A	NA	NA	nov_2020	Tipple	roots	NA	1	138221	NA	ITS1-1F†	X201SC20123127-Z01-F001	Bacteria	Proteobacteria	Alphaproteobacteria	Rhizobiales	Xanthobacteraceae	Pseudolabrys
121	SV12	Ti_Rhiz_6	0.0101265	Ti_Rhiz_6	FKDN202654743-1A	NA	NA	nov_2020	Tipple	rhizosphere	NA	5	163472	NA	ITS1-1F†	X201SC20123127-Z01-F001	Bacteria	Proteobacteria	Gammaproteobacteria	Betaproteobacteriales	Burkholderiaceae	Sphaerotilus
665	SV6	Ti_Roots_4	0.0100921	Ti_Roots_4	FKDN202654746-1A	NA	NA	nov_2020	Tipple	roots	NA	3	151349	NA	ITS1-1F†	X201SC20123127-Z01-F001	Bacteria	Actinobacteria	Actinobacteria	Micrococcales	Micrococcaceae	Pseudarthrobacter
443	SV37	Ti_Roots_1	0.0100459	Ti_Roots_1	FKDN202654744-1A	NA	NA	nov_2020	Tipple	roots	NA	1	138221	NA	ITS1-1F†	X201SC20123127-Z01-F001	Bacteria	Actinobacteria	Thermoleophilia	Solirubrobacterales	Solirubrobacteraceae	Conexibacter
115	SV12	Ti_Roots_2	0.010044	Ti_Roots_2	FKDN202654745-1A	NA	NA	nov_2020	Tipple	roots	NA	2	166122	NA	ITS1-1F†	X201SC20123127-Z01-F001	Bacteria	Proteobacteria	Gammaproteobacteria	Betaproteobacteriales	Burkholderiaceae	Sphaerotilus
371	SV28	Ti_Roots_4	0.00970752	Ti_Roots_4	FKDN202654746-1A	NA	NA	nov_2020	Tipple	roots	NA	3	151349	NA	ITS1-1F†	X201SC20123127-Z01-F001	Bacteria	Acidobacteria	Acidobacteriia	Acidobacteriales	Acidobacteriaceae_(Subgroup_1)	Granulicella
185	SV144	Ti_Rhiz_1	0.00964953	Ti_Rhiz_1	FKDN202654739-1A	NA	NA	nov_2020	Tipple	rhizosphere	NA	1	140148	NA	ITS1-1F†	X201SC20123127-Z01-F001	Bacteria	Bacteroidetes	Bacteroidia	Sphingobacteriales	Sphingobacteriaceae	Mucilaginibacter
637	SV53	Ti_Roots_5	0.00957238	Ti_Roots_5	FKDN202654747-1A	NA	NA	nov_2020	Tipple	roots	NA	4	147810	NA	ITS1-1F†	X201SC20123127-Z01-F001	Bacteria	Actinobacteria	Actinobacteria	Propionibacteriales	Nocardioidaceae	Nocardioides
520	SV46	Ti_Roots_5	0.00947462	Ti_Roots_5	FKDN202654747-1A	NA	NA	nov_2020	Tipple	roots	NA	4	147810	NA	ITS1-1F†	X201SC20123127-Z01-F001	Bacteria	Proteobacteria	Gammaproteobacteria	Xanthomonadales	Rhodanobacteraceae	Dyella
480	SV45	Ti_Rhiz_1	0.00939876	Ti_Rhiz_1	FKDN202654739-1A	NA	NA	nov_2020	Tipple	rhizosphere	NA	1	140148	NA	ITS1-1F†	X201SC20123127-Z01-F001	Bacteria	Actinobacteria	Actinobacteria	Corynebacteriales	Mycobacteriaceae	Mycobacterium
340	SV25	Ti_Rhiz_5	0.00932812	Ti_Rhiz_5	FKDN202654742-1A	NA	NA	nov_2020	Tipple	rhizosphere	NA	4	137928	NA	ITS1-1F†	X201SC20123127-Z01-F001	Bacteria	Proteobacteria	Alphaproteobacteria	Rhizobiales	Xanthobacteraceae	Rhodoplanes
372	SV28	Ti_Roots_1	0.00895535	Ti_Roots_1	FKDN202654744-1A	NA	NA	nov_2020	Tipple	roots	NA	1	138221	NA	ITS1-1F†	X201SC20123127-Z01-F001	Bacteria	Acidobacteria	Acidobacteriia	Acidobacteriales	Acidobacteriaceae_(Subgroup_1)	Granulicella
582	SV49	Ti_Rhiz_1	0.00894738	Ti_Rhiz_1	FKDN202654739-1A	NA	NA	nov_2020	Tipple	rhizosphere	NA	1	140148	NA	ITS1-1F†	X201SC20123127-Z01-F001	Bacteria	Actinobacteria	Actinobacteria	Micrococcales	Microbacteriaceae	Gryllotalpicola
176	SV144	Ti_Rhiz_2	0.0089391	Ti_Rhiz_2	FKDN202654740-1A	NA	NA	nov_2020	Tipple	rhizosphere	NA	2	145607	NA	ITS1-1F†	X201SC20123127-Z01-F001	Bacteria	Bacteroidetes	Bacteroidia	Sphingobacteriales	Sphingobacteriaceae	Mucilaginibacter
225	SV16	Ti_Roots_2	0.00889475	Ti_Roots_2	FKDN202654745-1A	NA	NA	nov_2020	Tipple	roots	NA	2	166122	NA	ITS1-1F†	X201SC20123127-Z01-F001	Bacteria	Proteobacteria	Gammaproteobacteria	Xanthomonadales	Xanthomonadaceae	Luteimonas
213	SV16	Ti_Rhiz_2	0.00879801	Ti_Rhiz_2	FKDN202654740-1A	NA	NA	nov_2020	Tipple	rhizosphere	NA	2	145607	NA	ITS1-1F†	X201SC20123127-Z01-F001	Bacteria	Proteobacteria	Gammaproteobacteria	Xanthomonadales	Xanthomonadaceae	Luteimonas
46	SV100	Ti_Rhiz_4	0.00872779	Ti_Rhiz_4	FKDN202654741-1A	NA	NA	nov_2020	Tipple	rhizosphere	NA	3	155460	NA	ITS1-1F†	X201SC20123127-Z01-F001	Bacteria	Proteobacteria	Alphaproteobacteria	Caulobacterales	Caulobacteraceae	Phenylobacterium
191	SV144	Ti_Rhiz_4	0.00864744	Ti_Rhiz_4	FKDN202654741-1A	NA	NA	nov_2020	Tipple	rhizosphere	NA	3	155460	NA	ITS1-1F†	X201SC20123127-Z01-F001	Bacteria	Bacteroidetes	Bacteroidia	Sphingobacteriales	Sphingobacteriaceae	Mucilaginibacter
114	SV12	Ti_Roots_4	0.008601	Ti_Roots_4	FKDN202654746-1A	NA	NA	nov_2020	Tipple	roots	NA	3	151349	NA	ITS1-1F†	X201SC20123127-Z01-F001	Bacteria	Proteobacteria	Gammaproteobacteria	Betaproteobacteriales	Burkholderiaceae	Sphaerotilus
599	SV49	Ti_Rhiz_4	0.00854701	Ti_Rhiz_4	FKDN202654741-1A	NA	NA	nov_2020	Tipple	rhizosphere	NA	3	155460	NA	ITS1-1F†	X201SC20123127-Z01-F001	Bacteria	Actinobacteria	Actinobacteria	Micrococcales	Microbacteriaceae	Gryllotalpicola
174	SV136	Ti_Roots_4	0.00850683	Ti_Roots_4	FKDN202654746-1A	NA	NA	nov_2020	Tipple	roots	NA	3	151349	NA	ITS1-1F†	X201SC20123127-Z01-F001	Bacteria	Acidobacteria	Acidobacteriia	Acidobacteriales	Acidobacteriaceae_(Subgroup_1)	Occallatibacter
150	SV126	Ti_Rhiz_6	0.00848592	Ti_Rhiz_6	FKDN202654743-1A	NA	NA	nov_2020	Tipple	rhizosphere	NA	5	163472	NA	ITS1-1F†	X201SC20123127-Z01-F001	Bacteria	Proteobacteria	Alphaproteobacteria	Caulobacterales	Caulobacteraceae	Caulobacter
594	SV49	Ti_Rhiz_5	0.00843175	Ti_Rhiz_5	FKDN202654742-1A	NA	NA	nov_2020	Tipple	rhizosphere	NA	4	137928	NA	ITS1-1F†	X201SC20123127-Z01-F001	Bacteria	Actinobacteria	Actinobacteria	Micrococcales	Microbacteriaceae	Gryllotalpicola
125	SV12	Ti_Rhiz_5	0.00831355	Ti_Rhiz_5	FKDN202654742-1A	NA	NA	nov_2020	Tipple	rhizosphere	NA	4	137928	NA	ITS1-1F†	X201SC20123127-Z01-F001	Bacteria	Proteobacteria	Gammaproteobacteria	Betaproteobacteriales	Burkholderiaceae	Sphaerotilus
332	SV25	Ti_Rhiz_2	0.00821349	Ti_Rhiz_2	FKDN202654740-1A	NA	NA	nov_2020	Tipple	rhizosphere	NA	2	145607	NA	ITS1-1F†	X201SC20123127-Z01-F001	Bacteria	Proteobacteria	Alphaproteobacteria	Rhizobiales	Xanthobacteraceae	Rhodoplanes
200	SV144	Ti_Roots_6	0.00821331	Ti_Roots_6	FKDN202654748-1A	NA	NA	nov_2020	Tipple	roots	NA	5	132836	NA	ITS1-1F†	X201SC20123127-Z01-F001	Bacteria	Bacteroidetes	Bacteroidia	Sphingobacteriales	Sphingobacteriaceae	Mucilaginibacter
224	SV16	Ti_Roots_6	0.00811734	Ti_Roots_6	FKDN202654748-1A	NA	NA	nov_2020	Tipple	roots	NA	5	132836	NA	ITS1-1F†	X201SC20123127-Z01-F001	Bacteria	Proteobacteria	Gammaproteobacteria	Xanthomonadales	Xanthomonadaceae	Luteimonas
633	SV53	Ti_Rhiz_5	0.00805745	Ti_Rhiz_5	FKDN202654742-1A	NA	NA	nov_2020	Tipple	rhizosphere	NA	4	137928	NA	ITS1-1F†	X201SC20123127-Z01-F001	Bacteria	Actinobacteria	Actinobacteria	Propionibacteriales	Nocardioidaceae	Nocardioides
172	SV136	Ti_Roots_1	0.00786484	Ti_Roots_1	FKDN202654744-1A	NA	NA	nov_2020	Tipple	roots	NA	1	138221	NA	ITS1-1F†	X201SC20123127-Z01-F001	Bacteria	Acidobacteria	Acidobacteriia	Acidobacteriales	Acidobacteriaceae_(Subgroup_1)	Occallatibacter
558	SV48	Ti_Rhiz_4	0.00780379	Ti_Rhiz_4	FKDN202654741-1A	NA	NA	nov_2020	Tipple	rhizosphere	NA	3	155460	NA	ITS1-1F†	X201SC20123127-Z01-F001	Bacteria	Proteobacteria	Alphaproteobacteria	Rhizobiales	Beijerinckiaceae	Roseiarcus
33	SV100	Ti_Rhiz_1	0.00778382	Ti_Rhiz_1	FKDN202654739-1A	NA	NA	nov_2020	Tipple	rhizosphere	NA	1	140148	NA	ITS1-1F†	X201SC20123127-Z01-F001	Bacteria	Proteobacteria	Alphaproteobacteria	Caulobacterales	Caulobacteraceae	Phenylobacterium
148	SV126	Ti_Rhiz_4	0.00776362	Ti_Rhiz_4	FKDN202654741-1A	NA	NA	nov_2020	Tipple	rhizosphere	NA	3	155460	NA	ITS1-1F†	X201SC20123127-Z01-F001	Bacteria	Proteobacteria	Alphaproteobacteria	Caulobacterales	Caulobacteraceae	Caulobacter
183	SV144	Ti_Roots_5	0.00773122	Ti_Roots_5	FKDN202654747-1A	NA	NA	nov_2020	Tipple	roots	NA	4	147810	NA	ITS1-1F†	X201SC20123127-Z01-F001	Bacteria	Bacteroidetes	Bacteroidia	Sphingobacteriales	Sphingobacteriaceae	Mucilaginibacter
333	SV25	Ti_Rhiz_1	0.0077136	Ti_Rhiz_1	FKDN202654739-1A	NA	NA	nov_2020	Tipple	rhizosphere	NA	1	140148	NA	ITS1-1F†	X201SC20123127-Z01-F001	Bacteria	Proteobacteria	Alphaproteobacteria	Rhizobiales	Xanthobacteraceae	Rhodoplanes
649	SV53	Ti_Rhiz_1	0.00770357	Ti_Rhiz_1	FKDN202654739-1A	NA	NA	nov_2020	Tipple	rhizosphere	NA	1	140148	NA	ITS1-1F†	X201SC20123127-Z01-F001	Bacteria	Actinobacteria	Actinobacteria	Propionibacteriales	Nocardioidaceae	Nocardioides
492	SV45	Ti_Roots_5	0.00764976	Ti_Roots_5	FKDN202654747-1A	NA	NA	nov_2020	Tipple	roots	NA	4	147810	NA	ITS1-1F†	X201SC20123127-Z01-F001	Bacteria	Actinobacteria	Actinobacteria	Corynebacteriales	Mycobacteriaceae	Mycobacterium
305	SV24	Ti_Rhiz_4	0.00762301	Ti_Rhiz_4	FKDN202654741-1A	NA	NA	nov_2020	Tipple	rhizosphere	NA	3	155460	NA	ITS1-1F†	X201SC20123127-Z01-F001	Bacteria	Proteobacteria	Gammaproteobacteria	Betaproteobacteriales	Burkholderiaceae	Curvibacter
149	SV126	Ti_Rhiz_2	0.00759874	Ti_Rhiz_2	FKDN202654740-1A	NA	NA	nov_2020	Tipple	rhizosphere	NA	2	145607	NA	ITS1-1F†	X201SC20123127-Z01-F001	Bacteria	Proteobacteria	Alphaproteobacteria	Caulobacterales	Caulobacteraceae	Caulobacter
569	SV48	Ti_Rhiz_1	0.0075832	Ti_Rhiz_1	FKDN202654739-1A	NA	NA	nov_2020	Tipple	rhizosphere	NA	1	140148	NA	ITS1-1F†	X201SC20123127-Z01-F001	Bacteria	Proteobacteria	Alphaproteobacteria	Rhizobiales	Beijerinckiaceae	Roseiarcus
632	SV53	Ti_Rhiz_6	0.00752418	Ti_Rhiz_6	FKDN202654743-1A	NA	NA	nov_2020	Tipple	rhizosphere	NA	5	163472	NA	ITS1-1F†	X201SC20123127-Z01-F001	Bacteria	Actinobacteria	Actinobacteria	Propionibacteriales	Nocardioidaceae	Nocardioides
222	SV16	Ti_Roots_4	0.00749449	Ti_Roots_4	FKDN202654746-1A	NA	NA	nov_2020	Tipple	roots	NA	3	151349	NA	ITS1-1F†	X201SC20123127-Z01-F001	Bacteria	Proteobacteria	Gammaproteobacteria	Xanthomonadales	Xanthomonadaceae	Luteimonas
93	SV114	Ti_Rhiz_6	0.00741104	Ti_Rhiz_6	FKDN202654743-1A	NA	NA	nov_2020	Tipple	rhizosphere	NA	5	163472	NA	ITS1-1F†	X201SC20123127-Z01-F001	Bacteria	Proteobacteria	Gammaproteobacteria	Xanthomonadales	Rhodanobacteraceae	Chujaibacter
105	SV12	Ti_Rhiz_1	0.00740265	Ti_Rhiz_1	FKDN202654739-1A	NA	NA	nov_2020	Tipple	rhizosphere	NA	1	140148	NA	ITS1-1F†	X201SC20123127-Z01-F001	Bacteria	Proteobacteria	Gammaproteobacteria	Betaproteobacteriales	Burkholderiaceae	Sphaerotilus
136	SV126	Ti_Roots_2	0.00737317	Ti_Roots_2	FKDN202654745-1A	NA	NA	nov_2020	Tipple	roots	NA	2	166122	NA	ITS1-1F†	X201SC20123127-Z01-F001	Bacteria	Proteobacteria	Alphaproteobacteria	Caulobacterales	Caulobacteraceae	Caulobacter
184	SV144	Ti_Rhiz_6	0.00726961	Ti_Rhiz_6	FKDN202654743-1A	NA	NA	nov_2020	Tipple	rhizosphere	NA	5	163472	NA	ITS1-1F†	X201SC20123127-Z01-F001	Bacteria	Bacteroidetes	Bacteroidia	Sphingobacteriales	Sphingobacteriaceae	Mucilaginibacter
598	SV49	Ti_Roots_5	0.00716095	Ti_Roots_5	FKDN202654747-1A	NA	NA	nov_2020	Tipple	roots	NA	4	147810	NA	ITS1-1F†	X201SC20123127-Z01-F001	Bacteria	Actinobacteria	Actinobacteria	Micrococcales	Microbacteriaceae	Gryllotalpicola
496	SV45	Ti_Rhiz_6	0.00712818	Ti_Rhiz_6	FKDN202654743-1A	NA	NA	nov_2020	Tipple	rhizosphere	NA	5	163472	NA	ITS1-1F†	X201SC20123127-Z01-F001	Bacteria	Actinobacteria	Actinobacteria	Corynebacteriales	Mycobacteriaceae	Mycobacterium
645	SV53	Ti_Roots_2	0.00712228	Ti_Roots_2	FKDN202654745-1A	NA	NA	nov_2020	Tipple	roots	NA	2	166122	NA	ITS1-1F†	X201SC20123127-Z01-F001	Bacteria	Actinobacteria	Actinobacteria	Propionibacteriales	Nocardioidaceae	Nocardioides
512	SV46	Ti_Rhiz_4	0.0070907	Ti_Rhiz_4	FKDN202654741-1A	NA	NA	nov_2020	Tipple	rhizosphere	NA	3	155460	NA	ITS1-1F†	X201SC20123127-Z01-F001	Bacteria	Proteobacteria	Gammaproteobacteria	Xanthomonadales	Rhodanobacteraceae	Dyella
40	SV100	Ti_Rhiz_5	0.00707243	Ti_Rhiz_5	FKDN202654742-1A	NA	NA	nov_2020	Tipple	rhizosphere	NA	4	137928	NA	ITS1-1F†	X201SC20123127-Z01-F001	Bacteria	Proteobacteria	Alphaproteobacteria	Caulobacterales	Caulobacteraceae	Phenylobacterium
32	SV100	Ti_Rhiz_2	0.00703438	Ti_Rhiz_2	FKDN202654740-1A	NA	NA	nov_2020	Tipple	rhizosphere	NA	2	145607	NA	ITS1-1F†	X201SC20123127-Z01-F001	Bacteria	Proteobacteria	Alphaproteobacteria	Caulobacterales	Caulobacteraceae	Phenylobacterium
348	SV25	Ti_Roots_6	0.00698971	Ti_Roots_6	FKDN202654748-1A	NA	NA	nov_2020	Tipple	roots	NA	5	132836	NA	ITS1-1F†	X201SC20123127-Z01-F001	Bacteria	Proteobacteria	Alphaproteobacteria	Rhizobiales	Xanthobacteraceae	Rhodoplanes
554	SV48	Ti_Rhiz_5	0.00695423	Ti_Rhiz_5	FKDN202654742-1A	NA	NA	nov_2020	Tipple	rhizosphere	NA	4	137928	NA	ITS1-1F†	X201SC20123127-Z01-F001	Bacteria	Proteobacteria	Alphaproteobacteria	Rhizobiales	Beijerinckiaceae	Roseiarcus
38	SV100	Ti_Rhiz_6	0.0069396	Ti_Rhiz_6	FKDN202654743-1A	NA	NA	nov_2020	Tipple	rhizosphere	NA	5	163472	NA	ITS1-1F†	X201SC20123127-Z01-F001	Bacteria	Proteobacteria	Alphaproteobacteria	Caulobacterales	Caulobacteraceae	Phenylobacterium
592	SV49	Ti_Rhiz_6	0.00690188	Ti_Rhiz_6	FKDN202654743-1A	NA	NA	nov_2020	Tipple	rhizosphere	NA	5	163472	NA	ITS1-1F†	X201SC20123127-Z01-F001	Bacteria	Actinobacteria	Actinobacteria	Micrococcales	Microbacteriaceae	Gryllotalpicola
60	SV102	Ti_Rhiz_4	0.00689988	Ti_Rhiz_4	FKDN202654741-1A	NA	NA	nov_2020	Tipple	rhizosphere	NA	3	155460	NA	ITS1-1F†	X201SC20123127-Z01-F001	Bacteria	Actinobacteria	Actinobacteria	Catenulisporales	Actinospicaceae	Actinospica
568	SV48	Ti_Rhiz_2	0.00687313	Ti_Rhiz_2	FKDN202654740-1A	NA	NA	nov_2020	Tipple	rhizosphere	NA	2	145607	NA	ITS1-1F†	X201SC20123127-Z01-F001	Bacteria	Proteobacteria	Alphaproteobacteria	Rhizobiales	Beijerinckiaceae	Roseiarcus
45	SV100	Ti_Roots_5	0.00686767	Ti_Roots_5	FKDN202654747-1A	NA	NA	nov_2020	Tipple	roots	NA	4	147810	NA	ITS1-1F†	X201SC20123127-Z01-F001	Bacteria	Proteobacteria	Alphaproteobacteria	Caulobacterales	Caulobacteraceae	Phenylobacterium
214	SV16	Ti_Roots_1	0.00675782	Ti_Roots_1	FKDN202654744-1A	NA	NA	nov_2020	Tipple	roots	NA	1	138221	NA	ITS1-1F†	X201SC20123127-Z01-F001	Bacteria	Proteobacteria	Gammaproteobacteria	Xanthomonadales	Xanthomonadaceae	Luteimonas
644	SV53	Ti_Rhiz_2	0.00673204	Ti_Rhiz_2	FKDN202654740-1A	NA	NA	nov_2020	Tipple	rhizosphere	NA	2	145607	NA	ITS1-1F†	X201SC20123127-Z01-F001	Bacteria	Actinobacteria	Actinobacteria	Propionibacteriales	Nocardioidaceae	Nocardioides
586	SV49	Ti_Rhiz_2	0.0067018	Ti_Rhiz_2	FKDN202654740-1A	NA	NA	nov_2020	Tipple	rhizosphere	NA	2	145607	NA	ITS1-1F†	X201SC20123127-Z01-F001	Bacteria	Actinobacteria	Actinobacteria	Micrococcales	Microbacteriaceae	Gryllotalpicola
98	SV114	Ti_Roots_1	0.00665868	Ti_Roots_1	FKDN202654744-1A	NA	NA	nov_2020	Tipple	roots	NA	1	138221	NA	ITS1-1F†	X201SC20123127-Z01-F001	Bacteria	Proteobacteria	Gammaproteobacteria	Xanthomonadales	Rhodanobacteraceae	Chujaibacter
548	SV47	Ti_Rhiz_5	0.00663902	Ti_Rhiz_5	FKDN202654742-1A	NA	NA	nov_2020	Tipple	rhizosphere	NA	4	137928	NA	ITS1-1F†	X201SC20123127-Z01-F001	Bacteria	Actinobacteria	Actinobacteria	Streptomycetales	Streptomycetaceae	Streptomyces
48	SV100	Ti_Roots_6	0.00661383	Ti_Roots_6	FKDN202654748-1A	NA	NA	nov_2020	Tipple	roots	NA	5	132836	NA	ITS1-1F†	X201SC20123127-Z01-F001	Bacteria	Proteobacteria	Alphaproteobacteria	Caulobacterales	Caulobacteraceae	Phenylobacterium
650	SV53	Ti_Roots_6	0.00658984	Ti_Roots_6	FKDN202654748-1A	NA	NA	nov_2020	Tipple	roots	NA	5	132836	NA	ITS1-1F†	X201SC20123127-Z01-F001	Bacteria	Actinobacteria	Actinobacteria	Propionibacteriales	Nocardioidaceae	Nocardioides
324	SV24	Ti_Rhiz_1	0.00652998	Ti_Rhiz_1	FKDN202654739-1A	NA	NA	nov_2020	Tipple	rhizosphere	NA	1	140148	NA	ITS1-1F†	X201SC20123127-Z01-F001	Bacteria	Proteobacteria	Gammaproteobacteria	Betaproteobacteriales	Burkholderiaceae	Curvibacter
83	SV114	Ti_Rhiz_2	0.00651032	Ti_Rhiz_2	FKDN202654740-1A	NA	NA	nov_2020	Tipple	rhizosphere	NA	2	145607	NA	ITS1-1F†	X201SC20123127-Z01-F001	Bacteria	Proteobacteria	Gammaproteobacteria	Xanthomonadales	Rhodanobacteraceae	Chujaibacter
258	SV22	Ti_Rhiz_4	0.00649814	Ti_Rhiz_4	FKDN202654741-1A	NA	NA	nov_2020	Tipple	rhizosphere	NA	3	155460	NA	ITS1-1F†	X201SC20123127-Z01-F001	Bacteria	Proteobacteria	Gammaproteobacteria	Betaproteobacteriales	Burkholderiaceae	Rhodoferax
47	SV100	Ti_Roots_2	0.00649098	Ti_Roots_2	FKDN202654745-1A	NA	NA	nov_2020	Tipple	roots	NA	2	166122	NA	ITS1-1F†	X201SC20123127-Z01-F001	Bacteria	Proteobacteria	Alphaproteobacteria	Caulobacterales	Caulobacteraceae	Phenylobacterium
630	SV53	Ti_Rhiz_4	0.00647805	Ti_Rhiz_4	FKDN202654741-1A	NA	NA	nov_2020	Tipple	rhizosphere	NA	3	155460	NA	ITS1-1F†	X201SC20123127-Z01-F001	Bacteria	Actinobacteria	Actinobacteria	Propionibacteriales	Nocardioidaceae	Nocardioides
575	SV48	Ti_Roots_6	0.00635791	Ti_Roots_6	FKDN202654748-1A	NA	NA	nov_2020	Tipple	roots	NA	5	132836	NA	ITS1-1F†	X201SC20123127-Z01-F001	Bacteria	Proteobacteria	Alphaproteobacteria	Rhizobiales	Beijerinckiaceae	Roseiarcus
338	SV25	Ti_Rhiz_6	0.00630787	Ti_Rhiz_6	FKDN202654743-1A	NA	NA	nov_2020	Tipple	rhizosphere	NA	5	163472	NA	ITS1-1F†	X201SC20123127-Z01-F001	Bacteria	Proteobacteria	Alphaproteobacteria	Rhizobiales	Xanthobacteraceae	Rhodoplanes
528	SV47	Ti_Rhiz_1	0.00617891	Ti_Rhiz_1	FKDN202654739-1A	NA	NA	nov_2020	Tipple	rhizosphere	NA	1	140148	NA	ITS1-1F†	X201SC20123127-Z01-F001	Bacteria	Actinobacteria	Actinobacteria	Streptomycetales	Streptomycetaceae	Streptomyces
63	SV102	Ti_Roots_5	0.0061752	Ti_Roots_5	FKDN202654747-1A	NA	NA	nov_2020	Tipple	roots	NA	4	147810	NA	ITS1-1F†	X201SC20123127-Z01-F001	Bacteria	Actinobacteria	Actinobacteria	Catenulisporales	Actinospicaceae	Actinospica
487	SV45	Ti_Roots_6	0.006086	Ti_Roots_6	FKDN202654748-1A	NA	NA	nov_2020	Tipple	roots	NA	5	132836	NA	ITS1-1F†	X201SC20123127-Z01-F001	Bacteria	Actinobacteria	Actinobacteria	Corynebacteriales	Mycobacteriaceae	Mycobacterium
100	SV114	Ti_Rhiz_4	0.00607631	Ti_Rhiz_4	FKDN202654741-1A	NA	NA	nov_2020	Tipple	rhizosphere	NA	3	155460	NA	ITS1-1F†	X201SC20123127-Z01-F001	Bacteria	Proteobacteria	Gammaproteobacteria	Xanthomonadales	Rhodanobacteraceae	Chujaibacter
319	SV24	Ti_Rhiz_2	0.00605682	Ti_Rhiz_2	FKDN202654740-1A	NA	NA	nov_2020	Tipple	rhizosphere	NA	2	145607	NA	ITS1-1F†	X201SC20123127-Z01-F001	Bacteria	Proteobacteria	Gammaproteobacteria	Betaproteobacteriales	Burkholderiaceae	Curvibacter
566	SV48	Ti_Roots_5	0.00595524	Ti_Roots_5	FKDN202654747-1A	NA	NA	nov_2020	Tipple	roots	NA	4	147810	NA	ITS1-1F†	X201SC20123127-Z01-F001	Bacteria	Proteobacteria	Alphaproteobacteria	Rhizobiales	Beijerinckiaceae	Roseiarcus
145	SV126	Ti_Roots_1	0.00588211	Ti_Roots_1	FKDN202654744-1A	NA	NA	nov_2020	Tipple	roots	NA	1	138221	NA	ITS1-1F†	X201SC20123127-Z01-F001	Bacteria	Proteobacteria	Alphaproteobacteria	Caulobacterales	Caulobacteraceae	Caulobacter
124	SV12	Ti_Roots_1	0.00581602	Ti_Roots_1	FKDN202654744-1A	NA	NA	nov_2020	Tipple	roots	NA	1	138221	NA	ITS1-1F†	X201SC20123127-Z01-F001	Bacteria	Proteobacteria	Gammaproteobacteria	Betaproteobacteriales	Burkholderiaceae	Sphaerotilus
59	SV102	Ti_Rhiz_5	0.00581161	Ti_Rhiz_5	FKDN202654742-1A	NA	NA	nov_2020	Tipple	rhizosphere	NA	4	137928	NA	ITS1-1F†	X201SC20123127-Z01-F001	Bacteria	Actinobacteria	Actinobacteria	Catenulisporales	Actinospicaceae	Actinospica
269	SV22	Ti_Rhiz_1	0.00580777	Ti_Rhiz_1	FKDN202654739-1A	NA	NA	nov_2020	Tipple	rhizosphere	NA	1	140148	NA	ITS1-1F†	X201SC20123127-Z01-F001	Bacteria	Proteobacteria	Gammaproteobacteria	Betaproteobacteriales	Burkholderiaceae	Rhodoferax
593	SV49	Ti_Roots_6	0.0058061	Ti_Roots_6	FKDN202654748-1A	NA	NA	nov_2020	Tipple	roots	NA	5	132836	NA	ITS1-1F†	X201SC20123127-Z01-F001	Bacteria	Actinobacteria	Actinobacteria	Micrococcales	Microbacteriaceae	Gryllotalpicola
49	SV100	Ti_Roots_4	0.0056346	Ti_Roots_4	FKDN202654746-1A	NA	NA	nov_2020	Tipple	roots	NA	3	151349	NA	ITS1-1F†	X201SC20123127-Z01-F001	Bacteria	Proteobacteria	Alphaproteobacteria	Caulobacterales	Caulobacteraceae	Phenylobacterium
506	SV46	Ti_Rhiz_5	0.0056343	Ti_Rhiz_5	FKDN202654742-1A	NA	NA	nov_2020	Tipple	rhizosphere	NA	4	137928	NA	ITS1-1F†	X201SC20123127-Z01-F001	Bacteria	Proteobacteria	Gammaproteobacteria	Xanthomonadales	Rhodanobacteraceae	Dyella
596	SV49	Ti_Roots_2	0.00563307	Ti_Roots_2	FKDN202654745-1A	NA	NA	nov_2020	Tipple	roots	NA	2	166122	NA	ITS1-1F†	X201SC20123127-Z01-F001	Bacteria	Actinobacteria	Actinobacteria	Micrococcales	Microbacteriaceae	Gryllotalpicola
556	SV48	Ti_Rhiz_6	0.005629	Ti_Rhiz_6	FKDN202654743-1A	NA	NA	nov_2020	Tipple	rhizosphere	NA	5	163472	NA	ITS1-1F†	X201SC20123127-Z01-F001	Bacteria	Proteobacteria	Alphaproteobacteria	Rhizobiales	Beijerinckiaceae	Roseiarcus
345	SV25	Ti_Roots_5	0.00561308	Ti_Roots_5	FKDN202654747-1A	NA	NA	nov_2020	Tipple	roots	NA	4	147810	NA	ITS1-1F†	X201SC20123127-Z01-F001	Bacteria	Proteobacteria	Alphaproteobacteria	Rhizobiales	Xanthobacteraceae	Rhodoplanes
489	SV45	Ti_Roots_4	0.00554827	Ti_Roots_4	FKDN202654746-1A	NA	NA	nov_2020	Tipple	roots	NA	3	151349	NA	ITS1-1F†	X201SC20123127-Z01-F001	Bacteria	Actinobacteria	Actinobacteria	Corynebacteriales	Mycobacteriaceae	Mycobacterium
550	SV47	Ti_Rhiz_4	0.00542348	Ti_Rhiz_4	FKDN202654741-1A	NA	NA	nov_2020	Tipple	rhizosphere	NA	3	155460	NA	ITS1-1F†	X201SC20123127-Z01-F001	Bacteria	Actinobacteria	Actinobacteria	Streptomycetales	Streptomycetaceae	Streptomyces
643	SV53	Ti_Roots_4	0.00540702	Ti_Roots_4	FKDN202654746-1A	NA	NA	nov_2020	Tipple	roots	NA	3	151349	NA	ITS1-1F†	X201SC20123127-Z01-F001	Bacteria	Actinobacteria	Actinobacteria	Propionibacteriales	Nocardioidaceae	Nocardioides
595	SV49	Ti_Roots_4	0.00535208	Ti_Roots_4	FKDN202654746-1A	NA	NA	nov_2020	Tipple	roots	NA	3	151349	NA	ITS1-1F†	X201SC20123127-Z01-F001	Bacteria	Actinobacteria	Actinobacteria	Micrococcales	Microbacteriaceae	Gryllotalpicola
490	SV45	Ti_Roots_2	0.0052284	Ti_Roots_2	FKDN202654745-1A	NA	NA	nov_2020	Tipple	roots	NA	2	166122	NA	ITS1-1F†	X201SC20123127-Z01-F001	Bacteria	Actinobacteria	Actinobacteria	Corynebacteriales	Mycobacteriaceae	Mycobacterium
142	SV126	Ti_Roots_5	0.00513242	Ti_Roots_5	FKDN202654747-1A	NA	NA	nov_2020	Tipple	roots	NA	4	147810	NA	ITS1-1F†	X201SC20123127-Z01-F001	Bacteria	Proteobacteria	Alphaproteobacteria	Caulobacterales	Caulobacteraceae	Caulobacter
268	SV22	Ti_Rhiz_2	0.00511957	Ti_Rhiz_2	FKDN202654740-1A	NA	NA	nov_2020	Tipple	rhizosphere	NA	2	145607	NA	ITS1-1F†	X201SC20123127-Z01-F001	Bacteria	Proteobacteria	Gammaproteobacteria	Betaproteobacteriales	Burkholderiaceae	Rhodoferax
518	SV46	Ti_Rhiz_1	0.00510562	Ti_Rhiz_1	FKDN202654739-1A	NA	NA	nov_2020	Tipple	rhizosphere	NA	1	140148	NA	ITS1-1F†	X201SC20123127-Z01-F001	Bacteria	Proteobacteria	Gammaproteobacteria	Xanthomonadales	Rhodanobacteraceae	Dyella
147	SV126	Ti_Rhiz_5	0.00508269	Ti_Rhiz_5	FKDN202654742-1A	NA	NA	nov_2020	Tipple	rhizosphere	NA	4	137928	NA	ITS1-1F†	X201SC20123127-Z01-F001	Bacteria	Proteobacteria	Alphaproteobacteria	Caulobacterales	Caulobacteraceae	Caulobacter
266	SV22	Ti_Roots_5	0.00497764	Ti_Roots_5	FKDN202654747-1A	NA	NA	nov_2020	Tipple	roots	NA	4	147810	NA	ITS1-1F†	X201SC20123127-Z01-F001	Bacteria	Proteobacteria	Gammaproteobacteria	Betaproteobacteriales	Burkholderiaceae	Rhodoferax
119	SV12	Ti_Rhiz_2	0.00494825	Ti_Rhiz_2	FKDN202654740-1A	NA	NA	nov_2020	Tipple	rhizosphere	NA	2	145607	NA	ITS1-1F†	X201SC20123127-Z01-F001	Bacteria	Proteobacteria	Gammaproteobacteria	Betaproteobacteriales	Burkholderiaceae	Sphaerotilus
74	SV102	Ti_Roots_2	0.00491275	Ti_Roots_2	FKDN202654745-1A	NA	NA	nov_2020	Tipple	roots	NA	2	166122	NA	ITS1-1F†	X201SC20123127-Z01-F001	Bacteria	Actinobacteria	Actinobacteria	Catenulisporales	Actinospicaceae	Actinospica
524	SV46	Ti_Roots_6	0.00477443	Ti_Roots_6	FKDN202654748-1A	NA	NA	nov_2020	Tipple	roots	NA	5	132836	NA	ITS1-1F†	X201SC20123127-Z01-F001	Bacteria	Proteobacteria	Gammaproteobacteria	Xanthomonadales	Rhodanobacteraceae	Dyella
123	SV12	Ti_Rhiz_4	0.00477066	Ti_Rhiz_4	FKDN202654741-1A	NA	NA	nov_2020	Tipple	rhizosphere	NA	3	155460	NA	ITS1-1F†	X201SC20123127-Z01-F001	Bacteria	Proteobacteria	Gammaproteobacteria	Betaproteobacteriales	Burkholderiaceae	Sphaerotilus
307	SV24	Ti_Rhiz_6	0.00467669	Ti_Rhiz_6	FKDN202654743-1A	NA	NA	nov_2020	Tipple	rhizosphere	NA	5	163472	NA	ITS1-1F†	X201SC20123127-Z01-F001	Bacteria	Proteobacteria	Gammaproteobacteria	Betaproteobacteriales	Burkholderiaceae	Curvibacter
573	SV48	Ti_Roots_2	0.00464567	Ti_Roots_2	FKDN202654745-1A	NA	NA	nov_2020	Tipple	roots	NA	2	166122	NA	ITS1-1F†	X201SC20123127-Z01-F001	Bacteria	Proteobacteria	Alphaproteobacteria	Rhizobiales	Beijerinckiaceae	Roseiarcus
513	SV46	Ti_Rhiz_2	0.0046056	Ti_Rhiz_2	FKDN202654740-1A	NA	NA	nov_2020	Tipple	rhizosphere	NA	2	145607	NA	ITS1-1F†	X201SC20123127-Z01-F001	Bacteria	Proteobacteria	Gammaproteobacteria	Xanthomonadales	Rhodanobacteraceae	Dyella
254	SV22	Ti_Rhiz_5	0.00458033	Ti_Rhiz_5	FKDN202654742-1A	NA	NA	nov_2020	Tipple	rhizosphere	NA	4	137928	NA	ITS1-1F†	X201SC20123127-Z01-F001	Bacteria	Proteobacteria	Gammaproteobacteria	Betaproteobacteriales	Burkholderiaceae	Rhodoferax
133	SV126	Ti_Roots_6	0.00451052	Ti_Roots_6	FKDN202654748-1A	NA	NA	nov_2020	Tipple	roots	NA	5	132836	NA	ITS1-1F†	X201SC20123127-Z01-F001	Bacteria	Proteobacteria	Alphaproteobacteria	Caulobacterales	Caulobacteraceae	Caulobacter
572	SV48	Ti_Roots_4	0.00450454	Ti_Roots_4	FKDN202654746-1A	NA	NA	nov_2020	Tipple	roots	NA	3	151349	NA	ITS1-1F†	X201SC20123127-Z01-F001	Bacteria	Proteobacteria	Alphaproteobacteria	Rhizobiales	Beijerinckiaceae	Roseiarcus
256	SV22	Ti_Rhiz_6	0.0044504	Ti_Rhiz_6	FKDN202654743-1A	NA	NA	nov_2020	Tipple	rhizosphere	NA	5	163472	NA	ITS1-1F†	X201SC20123127-Z01-F001	Bacteria	Proteobacteria	Gammaproteobacteria	Betaproteobacteriales	Burkholderiaceae	Rhodoferax
312	SV24	Ti_Roots_5	0.00438293	Ti_Roots_5	FKDN202654747-1A	NA	NA	nov_2020	Tipple	roots	NA	4	147810	NA	ITS1-1F†	X201SC20123127-Z01-F001	Bacteria	Proteobacteria	Gammaproteobacteria	Betaproteobacteriales	Burkholderiaceae	Curvibacter
499	SV45	Ti_Roots_1	0.00431245	Ti_Roots_1	FKDN202654744-1A	NA	NA	nov_2020	Tipple	roots	NA	1	138221	NA	ITS1-1F†	X201SC20123127-Z01-F001	Bacteria	Actinobacteria	Actinobacteria	Corynebacteriales	Mycobacteriaceae	Mycobacterium
600	SV49	Ti_Roots_1	0.00430418	Ti_Roots_1	FKDN202654744-1A	NA	NA	nov_2020	Tipple	roots	NA	1	138221	NA	ITS1-1F†	X201SC20123127-Z01-F001	Bacteria	Actinobacteria	Actinobacteria	Micrococcales	Microbacteriaceae	Gryllotalpicola
70	SV102	Ti_Rhiz_1	0.00429314	Ti_Rhiz_1	FKDN202654739-1A	NA	NA	nov_2020	Tipple	rhizosphere	NA	1	140148	NA	ITS1-1F†	X201SC20123127-Z01-F001	Bacteria	Actinobacteria	Actinobacteria	Catenulisporales	Actinospicaceae	Actinospica
62	SV102	Ti_Rhiz_6	0.00427125	Ti_Rhiz_6	FKDN202654743-1A	NA	NA	nov_2020	Tipple	rhizosphere	NA	5	163472	NA	ITS1-1F†	X201SC20123127-Z01-F001	Bacteria	Actinobacteria	Actinobacteria	Catenulisporales	Actinospicaceae	Actinospica
65	SV102	Ti_Rhiz_2	0.00425287	Ti_Rhiz_2	FKDN202654740-1A	NA	NA	nov_2020	Tipple	rhizosphere	NA	2	145607	NA	ITS1-1F†	X201SC20123127-Z01-F001	Bacteria	Actinobacteria	Actinobacteria	Catenulisporales	Actinospicaceae	Actinospica
139	SV126	Ti_Roots_4	0.00421418	Ti_Roots_4	FKDN202654746-1A	NA	NA	nov_2020	Tipple	roots	NA	3	151349	NA	ITS1-1F†	X201SC20123127-Z01-F001	Bacteria	Proteobacteria	Alphaproteobacteria	Caulobacterales	Caulobacteraceae	Caulobacter
347	SV25	Ti_Roots_2	0.00420052	Ti_Roots_2	FKDN202654745-1A	NA	NA	nov_2020	Tipple	roots	NA	2	166122	NA	ITS1-1F†	X201SC20123127-Z01-F001	Bacteria	Proteobacteria	Alphaproteobacteria	Rhizobiales	Xanthobacteraceae	Rhodoplanes
180	SV144	Ti_Roots_4	0.00415924	Ti_Roots_4	FKDN202654746-1A	NA	NA	nov_2020	Tipple	roots	NA	3	151349	NA	ITS1-1F†	X201SC20123127-Z01-F001	Bacteria	Bacteroidetes	Bacteroidia	Sphingobacteriales	Sphingobacteriaceae	Mucilaginibacter
273	SV22	Ti_Roots_2	0.00409531	Ti_Roots_2	FKDN202654745-1A	NA	NA	nov_2020	Tipple	roots	NA	2	166122	NA	ITS1-1F†	X201SC20123127-Z01-F001	Bacteria	Proteobacteria	Gammaproteobacteria	Betaproteobacteriales	Burkholderiaceae	Rhodoferax
635	SV53	Ti_Roots_1	0.00400677	Ti_Roots_1	FKDN202654744-1A	NA	NA	nov_2020	Tipple	roots	NA	1	138221	NA	ITS1-1F†	X201SC20123127-Z01-F001	Bacteria	Actinobacteria	Actinobacteria	Propionibacteriales	Nocardioidaceae	Nocardioides
50	SV100	Ti_Roots_1	0.00398199	Ti_Roots_1	FKDN202654744-1A	NA	NA	nov_2020	Tipple	roots	NA	1	138221	NA	ITS1-1F†	X201SC20123127-Z01-F001	Bacteria	Proteobacteria	Alphaproteobacteria	Caulobacterales	Caulobacteraceae	Phenylobacterium
69	SV102	Ti_Roots_4	0.00384534	Ti_Roots_4	FKDN202654746-1A	NA	NA	nov_2020	Tipple	roots	NA	3	151349	NA	ITS1-1F†	X201SC20123127-Z01-F001	Bacteria	Actinobacteria	Actinobacteria	Catenulisporales	Actinospicaceae	Actinospica
320	SV24	Ti_Roots_2	0.00382822	Ti_Roots_2	FKDN202654745-1A	NA	NA	nov_2020	Tipple	roots	NA	2	166122	NA	ITS1-1F†	X201SC20123127-Z01-F001	Bacteria	Proteobacteria	Gammaproteobacteria	Betaproteobacteriales	Burkholderiaceae	Curvibacter
308	SV24	Ti_Rhiz_5	0.00373322	Ti_Rhiz_5	FKDN202654742-1A	NA	NA	nov_2020	Tipple	rhizosphere	NA	4	137928	NA	ITS1-1F†	X201SC20123127-Z01-F001	Bacteria	Proteobacteria	Gammaproteobacteria	Betaproteobacteriales	Burkholderiaceae	Curvibacter
75	SV102	Ti_Roots_6	0.0036468	Ti_Roots_6	FKDN202654748-1A	NA	NA	nov_2020	Tipple	roots	NA	5	132836	NA	ITS1-1F†	X201SC20123127-Z01-F001	Bacteria	Actinobacteria	Actinobacteria	Catenulisporales	Actinospicaceae	Actinospica
190	SV144	Ti_Roots_2	0.00363398	Ti_Roots_2	FKDN202654745-1A	NA	NA	nov_2020	Tipple	roots	NA	2	166122	NA	ITS1-1F†	X201SC20123127-Z01-F001	Bacteria	Bacteroidetes	Bacteroidia	Sphingobacteriales	Sphingobacteriaceae	Mucilaginibacter
349	SV25	Ti_Roots_4	0.00358637	Ti_Roots_4	FKDN202654746-1A	NA	NA	nov_2020	Tipple	roots	NA	3	151349	NA	ITS1-1F†	X201SC20123127-Z01-F001	Bacteria	Proteobacteria	Alphaproteobacteria	Rhizobiales	Xanthobacteraceae	Rhodoplanes
514	SV46	Ti_Roots_1	0.0035524	Ti_Roots_1	FKDN202654744-1A	NA	NA	nov_2020	Tipple	roots	NA	1	138221	NA	ITS1-1F†	X201SC20123127-Z01-F001	Bacteria	Proteobacteria	Gammaproteobacteria	Xanthomonadales	Rhodanobacteraceae	Dyella
522	SV46	Ti_Roots_4	0.00324107	Ti_Roots_4	FKDN202654746-1A	NA	NA	nov_2020	Tipple	roots	NA	3	151349	NA	ITS1-1F†	X201SC20123127-Z01-F001	Bacteria	Proteobacteria	Gammaproteobacteria	Xanthomonadales	Rhodanobacteraceae	Dyella
275	SV22	Ti_Roots_6	0.00323894	Ti_Roots_6	FKDN202654748-1A	NA	NA	nov_2020	Tipple	roots	NA	5	132836	NA	ITS1-1F†	X201SC20123127-Z01-F001	Bacteria	Proteobacteria	Gammaproteobacteria	Betaproteobacteriales	Burkholderiaceae	Rhodoferax
502	SV46	Ti_Rhiz_6	0.00322465	Ti_Rhiz_6	FKDN202654743-1A	NA	NA	nov_2020	Tipple	rhizosphere	NA	5	163472	NA	ITS1-1F†	X201SC20123127-Z01-F001	Bacteria	Proteobacteria	Gammaproteobacteria	Xanthomonadales	Rhodanobacteraceae	Dyella
325	SV24	Ti_Roots_6	0.00319095	Ti_Roots_6	FKDN202654748-1A	NA	NA	nov_2020	Tipple	roots	NA	5	132836	NA	ITS1-1F†	X201SC20123127-Z01-F001	Bacteria	Proteobacteria	Gammaproteobacteria	Betaproteobacteriales	Burkholderiaceae	Curvibacter
272	SV22	Ti_Roots_4	0.00306842	Ti_Roots_4	FKDN202654746-1A	NA	NA	nov_2020	Tipple	roots	NA	3	151349	NA	ITS1-1F†	X201SC20123127-Z01-F001	Bacteria	Proteobacteria	Gammaproteobacteria	Betaproteobacteriales	Burkholderiaceae	Rhodoferax
525	SV46	Ti_Roots_2	0.00305934	Ti_Roots_2	FKDN202654745-1A	NA	NA	nov_2020	Tipple	roots	NA	2	166122	NA	ITS1-1F†	X201SC20123127-Z01-F001	Bacteria	Proteobacteria	Gammaproteobacteria	Xanthomonadales	Rhodanobacteraceae	Dyella
57	SV102	Ti_Roots_1	0.00302367	Ti_Roots_1	FKDN202654744-1A	NA	NA	nov_2020	Tipple	roots	NA	1	138221	NA	ITS1-1F†	X201SC20123127-Z01-F001	Bacteria	Actinobacteria	Actinobacteria	Catenulisporales	Actinospicaceae	Actinospica
318	SV24	Ti_Roots_4	0.00297425	Ti_Roots_4	FKDN202654746-1A	NA	NA	nov_2020	Tipple	roots	NA	3	151349	NA	ITS1-1F†	X201SC20123127-Z01-F001	Bacteria	Proteobacteria	Gammaproteobacteria	Betaproteobacteriales	Burkholderiaceae	Curvibacter
350	SV25	Ti_Roots_1	0.00289149	Ti_Roots_1	FKDN202654744-1A	NA	NA	nov_2020	Tipple	roots	NA	1	138221	NA	ITS1-1F†	X201SC20123127-Z01-F001	Bacteria	Proteobacteria	Alphaproteobacteria	Rhizobiales	Xanthobacteraceae	Rhodoplanes
560	SV48	Ti_Roots_1	0.0028254	Ti_Roots_1	FKDN202654744-1A	NA	NA	nov_2020	Tipple	roots	NA	1	138221	NA	ITS1-1F†	X201SC20123127-Z01-F001	Bacteria	Proteobacteria	Alphaproteobacteria	Rhizobiales	Beijerinckiaceae	Roseiarcus
310	SV24	Ti_Roots_1	0.00261886	Ti_Roots_1	FKDN202654744-1A	NA	NA	nov_2020	Tipple	roots	NA	1	138221	NA	ITS1-1F†	X201SC20123127-Z01-F001	Bacteria	Proteobacteria	Gammaproteobacteria	Betaproteobacteriales	Burkholderiaceae	Curvibacter
260	SV22	Ti_Roots_1	0.00255277	Ti_Roots_1	FKDN202654744-1A	NA	NA	nov_2020	Tipple	roots	NA	1	138221	NA	ITS1-1F†	X201SC20123127-Z01-F001	Bacteria	Proteobacteria	Gammaproteobacteria	Betaproteobacteriales	Burkholderiaceae	Rhodoferax
95	SV114	Ti_Rhiz_5	0.00238374	Ti_Rhiz_5	FKDN202654742-1A	NA	NA	nov_2020	Tipple	rhizosphere	NA	4	137928	NA	ITS1-1F†	X201SC20123127-Z01-F001	Bacteria	Proteobacteria	Gammaproteobacteria	Xanthomonadales	Rhodanobacteraceae	Chujaibacter
88	SV114	Ti_Rhiz_1	0.00227697	Ti_Rhiz_1	FKDN202654739-1A	NA	NA	nov_2020	Tipple	rhizosphere	NA	1	140148	NA	ITS1-1F†	X201SC20123127-Z01-F001	Bacteria	Proteobacteria	Gammaproteobacteria	Xanthomonadales	Rhodanobacteraceae	Chujaibacter
186	SV144	Ti_Roots_1	0.00193317	Ti_Roots_1	FKDN202654744-1A	NA	NA	nov_2020	Tipple	roots	NA	1	138221	NA	ITS1-1F†	X201SC20123127-Z01-F001	Bacteria	Bacteroidetes	Bacteroidia	Sphingobacteriales	Sphingobacteriaceae	Mucilaginibacter
94	SV114	Ti_Roots_6	0.0015195	Ti_Roots_6	FKDN202654748-1A	NA	NA	nov_2020	Tipple	roots	NA	5	132836	NA	ITS1-1F†	X201SC20123127-Z01-F001	Bacteria	Proteobacteria	Gammaproteobacteria	Xanthomonadales	Rhodanobacteraceae	Chujaibacter
96	SV114	Ti_Roots_4	0.00134979	Ti_Roots_4	FKDN202654746-1A	NA	NA	nov_2020	Tipple	roots	NA	3	151349	NA	ITS1-1F†	X201SC20123127-Z01-F001	Bacteria	Proteobacteria	Gammaproteobacteria	Xanthomonadales	Rhodanobacteraceae	Chujaibacter
97	SV114	Ti_Roots_2	0.0011169	Ti_Roots_2	FKDN202654745-1A	NA	NA	nov_2020	Tipple	roots	NA	2	166122	NA	ITS1-1F†	X201SC20123127-Z01-F001	Bacteria	Proteobacteria	Gammaproteobacteria	Xanthomonadales	Rhodanobacteraceae	Chujaibacter

## Sheet: B
	Axis.1	Axis.2	X.SampleID	X.SampleIDNovogene	BarcodeSequence	LinkerPrimerSequence	Date	Cultivar	Material	used_name	Rep	Read_number	low_read	Type	Experiment
Che_Rhiz_2	-0.150831	0.0337909	Che_Rhiz_2	FKDN202654749-1A	NA	NA	nov_2020	Chevallier	rhizosphere	NA	1	157371	NA	ITS1-1F†	X201SC20123127-Z01-F001
Che_Rhiz_3	-0.0687245	-0.0753927	Che_Rhiz_3	FKDN202654750-1A	NA	NA	nov_2020	Chevallier	rhizosphere	NA	2	148574	NA	ITS1-1F†	X201SC20123127-Z01-F001
Che_Rhiz_4	-0.0657161	-0.0471737	Che_Rhiz_4	FKDN202654751-1A	NA	NA	nov_2020	Chevallier	rhizosphere	NA	3	143428	NA	ITS1-1F†	X201SC20123127-Z01-F001
Che_Rhiz_5	-0.0957207	-0.0571907	Che_Rhiz_5	FKDN202654752-1A	NA	NA	nov_2020	Chevallier	rhizosphere	NA	4	142946	NA	ITS1-1F†	X201SC20123127-Z01-F001
Che_Rhiz_6	-0.080791	-0.0510125	Che_Rhiz_6	FKDN202654753-1A	NA	NA	nov_2020	Chevallier	rhizosphere	NA	5	152328	NA	ITS1-1F†	X201SC20123127-Z01-F001
Che_Roots_2	0.360464	0.184882	Che_Roots_2	FKDN202654754-1A	NA	NA	nov_2020	Chevallier	roots	NA	1	169149	NA	ITS1-1F†	X201SC20123127-Z01-F001
Che_Roots_3	0.361348	-0.0417103	Che_Roots_3	FKDN202654755-1A	NA	NA	nov_2020	Chevallier	roots	NA	2	153822	NA	ITS1-1F†	X201SC20123127-Z01-F001
Che_Roots_4	0.427724	0.207131	Che_Roots_4	FKDN202654756-1A	NA	NA	nov_2020	Chevallier	roots	NA	3	168529	NA	ITS1-1F†	X201SC20123127-Z01-F001
Che_Roots_5	0.0974159	-0.148523	Che_Roots_5	FKDN202654757-1A	NA	NA	nov_2020	Chevallier	roots	NA	4	153857	NA	ITS1-1F†	X201SC20123127-Z01-F001
Che_Roots_6	0.1483	0.0131249	Che_Roots_6	FKDN202654758-1A	NA	NA	nov_2020	Chevallier	roots	NA	5	159052	NA	ITS1-1F†	X201SC20123127-Z01-F001
Soil_1	-0.302273	0.174294	Soil_1	FKDN202654734-1A	NA	NA	nov_2020	Soil	bulk_soil	NA	1	168870	NA	ITS1-1F†	X201SC20123127-Z01-F001
Soil_2	-0.295376	0.173441	Soil_2	FKDN202654735-1A	NA	NA	nov_2020	Soil	bulk_soil	NA	2	139968	NA	ITS1-1F†	X201SC20123127-Z01-F001
Soil_3	-0.309291	0.166875	Soil_3	FKDN202654736-1A	NA	NA	nov_2020	Soil	bulk_soil	NA	3	158868	NA	ITS1-1F†	X201SC20123127-Z01-F001
Soil_4	-0.12633	-0.036121	Soil_4	FKDN202654737-1A	NA	NA	nov_2020	Soil	bulk_soil	NA	4	134188	NA	ITS1-1F†	X201SC20123127-Z01-F001
Soil_5	-0.206694	0.0694957	Soil_5	FKDN202654738-1A	NA	NA	nov_2020	Soil	bulk_soil	NA	5	160871	NA	ITS1-1F†	X201SC20123127-Z01-F001
Ti_Rhiz_1	-0.0853618	-0.083402	Ti_Rhiz_1	FKDN202654739-1A	NA	NA	nov_2020	Tipple	rhizosphere	NA	1	140148	NA	ITS1-1F†	X201SC20123127-Z01-F001
Ti_Rhiz_2	-0.080689	-0.0843212	Ti_Rhiz_2	FKDN202654740-1A	NA	NA	nov_2020	Tipple	rhizosphere	NA	2	145607	NA	ITS1-1F†	X201SC20123127-Z01-F001
Ti_Rhiz_4	-0.136124	-0.010299	Ti_Rhiz_4	FKDN202654741-1A	NA	NA	nov_2020	Tipple	rhizosphere	NA	3	155460	NA	ITS1-1F†	X201SC20123127-Z01-F001
Ti_Rhiz_5	-0.0947001	-0.0622034	Ti_Rhiz_5	FKDN202654742-1A	NA	NA	nov_2020	Tipple	rhizosphere	NA	4	137928	NA	ITS1-1F†	X201SC20123127-Z01-F001
Ti_Rhiz_6	0.0180554	-0.0919956	Ti_Rhiz_6	FKDN202654743-1A	NA	NA	nov_2020	Tipple	rhizosphere	NA	5	163472	NA	ITS1-1F†	X201SC20123127-Z01-F001
Ti_Roots_1	0.227167	-0.10497	Ti_Roots_1	FKDN202654744-1A	NA	NA	nov_2020	Tipple	roots	NA	1	138221	NA	ITS1-1F†	X201SC20123127-Z01-F001
Ti_Roots_2	0.173449	-0.0238485	Ti_Roots_2	FKDN202654745-1A	NA	NA	nov_2020	Tipple	roots	NA	2	166122	NA	ITS1-1F†	X201SC20123127-Z01-F001
Ti_Roots_4	0.246407	0.16491	Ti_Roots_4	FKDN202654746-1A	NA	NA	nov_2020	Tipple	roots	NA	3	151349	NA	ITS1-1F†	X201SC20123127-Z01-F001
Ti_Roots_5	-0.0069577	-0.0939402	Ti_Roots_5	FKDN202654747-1A	NA	NA	nov_2020	Tipple	roots	NA	4	147810	NA	ITS1-1F†	X201SC20123127-Z01-F001
Ti_Roots_6	0.0452492	-0.175842	Ti_Roots_6	FKDN202654748-1A	NA	NA	nov_2020	Tipple	roots	NA	5	132836	NA	ITS1-1F†	X201SC20123127-Z01-F001

## Sheet: C
	OTU	Sample	Abundance	X.SampleID	X.SampleIDNovogene	BarcodeSequence	LinkerPrimerSequence	Date	Cultivar	Material	used_name	Rep	Read_number	low_read	Type	Experiment	Kingdom	Phylum	Class	Order	Family	Genus
23	SV1	Ti_Roots_6	0.772888	Ti_Roots_6	FKDN202654748-1A	NA	NA	nov_2020	Tipple	roots	NA	5	132836	NA	ITS1-1F†	X201SC20123127-Z01-F001	k__Fungi	p__Basidiomycota	c__Tremellomycetes	o__Trichosporonales	f__Trichosporonaceae	Apiotrichum
229	SV2	Che_Rhiz_6	0.745148	Che_Rhiz_6	FKDN202654753-1A	NA	NA	nov_2020	Chevallier	rhizosphere	NA	5	152328	NA	ITS1-1F†	X201SC20123127-Z01-F001	k__Fungi	p__Basidiomycota	c__Tremellomycetes	o__Tremellales	f__Trimorphomycetaceae	Saitozyma
13	SV1	Ti_Roots_2	0.666348	Ti_Roots_2	FKDN202654745-1A	NA	NA	nov_2020	Tipple	roots	NA	2	166122	NA	ITS1-1F†	X201SC20123127-Z01-F001	k__Fungi	p__Basidiomycota	c__Tremellomycetes	o__Trichosporonales	f__Trichosporonaceae	Apiotrichum
232	SV2	Che_Rhiz_3	0.562088	Che_Rhiz_3	FKDN202654750-1A	NA	NA	nov_2020	Chevallier	rhizosphere	NA	2	148574	NA	ITS1-1F†	X201SC20123127-Z01-F001	k__Fungi	p__Basidiomycota	c__Tremellomycetes	o__Tremellales	f__Trimorphomycetaceae	Saitozyma
3	SV1	Ti_Roots_4	0.549167	Ti_Roots_4	FKDN202654746-1A	NA	NA	nov_2020	Tipple	roots	NA	3	151349	NA	ITS1-1F†	X201SC20123127-Z01-F001	k__Fungi	p__Basidiomycota	c__Tremellomycetes	o__Trichosporonales	f__Trichosporonaceae	Apiotrichum
20	SV1	Che_Roots_3	0.504558	Che_Roots_3	FKDN202654755-1A	NA	NA	nov_2020	Chevallier	roots	NA	2	153822	NA	ITS1-1F†	X201SC20123127-Z01-F001	k__Fungi	p__Basidiomycota	c__Tremellomycetes	o__Trichosporonales	f__Trichosporonaceae	Apiotrichum
228	SV2	Che_Rhiz_2	0.504531	Che_Rhiz_2	FKDN202654749-1A	NA	NA	nov_2020	Chevallier	rhizosphere	NA	1	157371	NA	ITS1-1F†	X201SC20123127-Z01-F001	k__Fungi	p__Basidiomycota	c__Tremellomycetes	o__Tremellales	f__Trimorphomycetaceae	Saitozyma
24	SV1	Ti_Roots_1	0.499411	Ti_Roots_1	FKDN202654744-1A	NA	NA	nov_2020	Tipple	roots	NA	1	138221	NA	ITS1-1F†	X201SC20123127-Z01-F001	k__Fungi	p__Basidiomycota	c__Tremellomycetes	o__Trichosporonales	f__Trichosporonaceae	Apiotrichum
6	SV1	Ti_Roots_5	0.483984	Ti_Roots_5	FKDN202654747-1A	NA	NA	nov_2020	Tipple	roots	NA	4	147810	NA	ITS1-1F†	X201SC20123127-Z01-F001	k__Fungi	p__Basidiomycota	c__Tremellomycetes	o__Trichosporonales	f__Trichosporonaceae	Apiotrichum
227	SV2	Che_Rhiz_4	0.471131	Che_Rhiz_4	FKDN202654751-1A	NA	NA	nov_2020	Chevallier	rhizosphere	NA	3	143428	NA	ITS1-1F†	X201SC20123127-Z01-F001	k__Fungi	p__Basidiomycota	c__Tremellomycetes	o__Tremellales	f__Trimorphomycetaceae	Saitozyma
17	SV1	Che_Roots_2	0.393247	Che_Roots_2	FKDN202654754-1A	NA	NA	nov_2020	Chevallier	roots	NA	1	169149	NA	ITS1-1F†	X201SC20123127-Z01-F001	k__Fungi	p__Basidiomycota	c__Tremellomycetes	o__Trichosporonales	f__Trichosporonaceae	Apiotrichum
249	SV2	Che_Roots_3	0.338131	Che_Roots_3	FKDN202654755-1A	NA	NA	nov_2020	Chevallier	roots	NA	2	153822	NA	ITS1-1F†	X201SC20123127-Z01-F001	k__Fungi	p__Basidiomycota	c__Tremellomycetes	o__Tremellales	f__Trimorphomycetaceae	Saitozyma
246	SV2	Che_Roots_2	0.335554	Che_Roots_2	FKDN202654754-1A	NA	NA	nov_2020	Chevallier	roots	NA	1	169149	NA	ITS1-1F†	X201SC20123127-Z01-F001	k__Fungi	p__Basidiomycota	c__Tremellomycetes	o__Tremellales	f__Trimorphomycetaceae	Saitozyma
16	SV1	Che_Roots_6	0.290733	Che_Roots_6	FKDN202654758-1A	NA	NA	nov_2020	Chevallier	roots	NA	5	159052	NA	ITS1-1F†	X201SC20123127-Z01-F001	k__Fungi	p__Basidiomycota	c__Tremellomycetes	o__Trichosporonales	f__Trichosporonaceae	Apiotrichum
11	SV1	Che_Rhiz_5	0.285422	Che_Rhiz_5	FKDN202654752-1A	NA	NA	nov_2020	Chevallier	rhizosphere	NA	4	142946	NA	ITS1-1F†	X201SC20123127-Z01-F001	k__Fungi	p__Basidiomycota	c__Tremellomycetes	o__Trichosporonales	f__Trichosporonaceae	Apiotrichum
12	SV1	Ti_Rhiz_2	0.273191	Ti_Rhiz_2	FKDN202654740-1A	NA	NA	nov_2020	Tipple	rhizosphere	NA	2	145607	NA	ITS1-1F†	X201SC20123127-Z01-F001	k__Fungi	p__Basidiomycota	c__Tremellomycetes	o__Trichosporonales	f__Trichosporonaceae	Apiotrichum
25	SV1	Che_Roots_5	0.267391	Che_Roots_5	FKDN202654757-1A	NA	NA	nov_2020	Chevallier	roots	NA	4	153857	NA	ITS1-1F†	X201SC20123127-Z01-F001	k__Fungi	p__Basidiomycota	c__Tremellomycetes	o__Trichosporonales	f__Trichosporonaceae	Apiotrichum
706	SV9	Che_Roots_6	0.256816	Che_Roots_6	FKDN202654758-1A	NA	NA	nov_2020	Chevallier	roots	NA	5	159052	NA	ITS1-1F†	X201SC20123127-Z01-F001	k__Fungi	p__Ascomycota	c__Sordariomycetes	o__Hypocreales	f__Hypocreaceae	Trichoderma
226	SV2	Che_Rhiz_5	0.249242	Che_Rhiz_5	FKDN202654752-1A	NA	NA	nov_2020	Chevallier	rhizosphere	NA	4	142946	NA	ITS1-1F†	X201SC20123127-Z01-F001	k__Fungi	p__Basidiomycota	c__Tremellomycetes	o__Tremellales	f__Trimorphomycetaceae	Saitozyma
21	SV1	Che_Rhiz_4	0.24883	Che_Rhiz_4	FKDN202654751-1A	NA	NA	nov_2020	Chevallier	rhizosphere	NA	3	143428	NA	ITS1-1F†	X201SC20123127-Z01-F001	k__Fungi	p__Basidiomycota	c__Tremellomycetes	o__Trichosporonales	f__Trichosporonaceae	Apiotrichum
8	SV1	Ti_Rhiz_1	0.245919	Ti_Rhiz_1	FKDN202654739-1A	NA	NA	nov_2020	Tipple	rhizosphere	NA	1	140148	NA	ITS1-1F†	X201SC20123127-Z01-F001	k__Fungi	p__Basidiomycota	c__Tremellomycetes	o__Trichosporonales	f__Trichosporonaceae	Apiotrichum
349	SV4	Ti_Rhiz_6	0.232869	Ti_Rhiz_6	FKDN202654743-1A	NA	NA	nov_2020	Tipple	rhizosphere	NA	5	163472	NA	ITS1-1F†	X201SC20123127-Z01-F001	k__Fungi	p__Ascomycota	c__Saccharomycetes	o__Saccharomycetales	f__Saccharomycetales_fam_Incertae_sedis	Candida
5	SV1	Soil_5	0.223766	Soil_5	FKDN202654738-1A	NA	NA	nov_2020	Soil	bulk_soil	NA	5	160871	NA	ITS1-1F†	X201SC20123127-Z01-F001	k__Fungi	p__Basidiomycota	c__Tremellomycetes	o__Trichosporonales	f__Trichosporonaceae	Apiotrichum
245	SV2	Ti_Roots_4	0.216617	Ti_Roots_4	FKDN202654746-1A	NA	NA	nov_2020	Tipple	roots	NA	3	151349	NA	ITS1-1F†	X201SC20123127-Z01-F001	k__Fungi	p__Basidiomycota	c__Tremellomycetes	o__Tremellales	f__Trimorphomycetaceae	Saitozyma
242	SV2	Ti_Roots_2	0.214929	Ti_Roots_2	FKDN202654745-1A	NA	NA	nov_2020	Tipple	roots	NA	2	166122	NA	ITS1-1F†	X201SC20123127-Z01-F001	k__Fungi	p__Basidiomycota	c__Tremellomycetes	o__Tremellales	f__Trimorphomycetaceae	Saitozyma
14	SV1	Ti_Rhiz_4	0.205216	Ti_Rhiz_4	FKDN202654741-1A	NA	NA	nov_2020	Tipple	rhizosphere	NA	3	155460	NA	ITS1-1F†	X201SC20123127-Z01-F001	k__Fungi	p__Basidiomycota	c__Tremellomycetes	o__Trichosporonales	f__Trichosporonaceae	Apiotrichum
1	SV1	Che_Rhiz_2	0.205154	Che_Rhiz_2	FKDN202654749-1A	NA	NA	nov_2020	Chevallier	rhizosphere	NA	1	157371	NA	ITS1-1F†	X201SC20123127-Z01-F001	k__Fungi	p__Basidiomycota	c__Tremellomycetes	o__Trichosporonales	f__Trichosporonaceae	Apiotrichum
7	SV1	Ti_Rhiz_6	0.204426	Ti_Rhiz_6	FKDN202654743-1A	NA	NA	nov_2020	Tipple	rhizosphere	NA	5	163472	NA	ITS1-1F†	X201SC20123127-Z01-F001	k__Fungi	p__Basidiomycota	c__Tremellomycetes	o__Trichosporonales	f__Trichosporonaceae	Apiotrichum
231	SV2	Soil_4	0.204161	Soil_4	FKDN202654737-1A	NA	NA	nov_2020	Soil	bulk_soil	NA	4	134188	NA	ITS1-1F†	X201SC20123127-Z01-F001	k__Fungi	p__Basidiomycota	c__Tremellomycetes	o__Tremellales	f__Trimorphomycetaceae	Saitozyma
4	SV1	Ti_Rhiz_5	0.19625	Ti_Rhiz_5	FKDN202654742-1A	NA	NA	nov_2020	Tipple	rhizosphere	NA	4	137928	NA	ITS1-1F†	X201SC20123127-Z01-F001	k__Fungi	p__Basidiomycota	c__Tremellomycetes	o__Trichosporonales	f__Trichosporonaceae	Apiotrichum
243	SV2	Che_Roots_5	0.189537	Che_Roots_5	FKDN202654757-1A	NA	NA	nov_2020	Chevallier	roots	NA	4	153857	NA	ITS1-1F†	X201SC20123127-Z01-F001	k__Fungi	p__Basidiomycota	c__Tremellomycetes	o__Tremellales	f__Trimorphomycetaceae	Saitozyma
15	SV1	Che_Rhiz_6	0.185012	Che_Rhiz_6	FKDN202654753-1A	NA	NA	nov_2020	Chevallier	rhizosphere	NA	5	152328	NA	ITS1-1F†	X201SC20123127-Z01-F001	k__Fungi	p__Basidiomycota	c__Tremellomycetes	o__Trichosporonales	f__Trichosporonaceae	Apiotrichum
2	SV1	Soil_4	0.180649	Soil_4	FKDN202654737-1A	NA	NA	nov_2020	Soil	bulk_soil	NA	4	134188	NA	ITS1-1F†	X201SC20123127-Z01-F001	k__Fungi	p__Basidiomycota	c__Tremellomycetes	o__Trichosporonales	f__Trichosporonaceae	Apiotrichum
22	SV1	Soil_3	0.168156	Soil_3	FKDN202654736-1A	NA	NA	nov_2020	Soil	bulk_soil	NA	3	158868	NA	ITS1-1F†	X201SC20123127-Z01-F001	k__Fungi	p__Basidiomycota	c__Tremellomycetes	o__Trichosporonales	f__Trichosporonaceae	Apiotrichum
9	SV1	Soil_2	0.167446	Soil_2	FKDN202654735-1A	NA	NA	nov_2020	Soil	bulk_soil	NA	2	139968	NA	ITS1-1F†	X201SC20123127-Z01-F001	k__Fungi	p__Basidiomycota	c__Tremellomycetes	o__Trichosporonales	f__Trichosporonaceae	Apiotrichum
332	SV4	Ti_Rhiz_2	0.16145	Ti_Rhiz_2	FKDN202654740-1A	NA	NA	nov_2020	Tipple	rhizosphere	NA	2	145607	NA	ITS1-1F†	X201SC20123127-Z01-F001	k__Fungi	p__Ascomycota	c__Saccharomycetes	o__Saccharomycetales	f__Saccharomycetales_fam_Incertae_sedis	Candida
241	SV2	Ti_Rhiz_2	0.159921	Ti_Rhiz_2	FKDN202654740-1A	NA	NA	nov_2020	Tipple	rhizosphere	NA	2	145607	NA	ITS1-1F†	X201SC20123127-Z01-F001	k__Fungi	p__Basidiomycota	c__Tremellomycetes	o__Tremellales	f__Trimorphomycetaceae	Saitozyma
460	SV5	Soil_3	0.157664	Soil_3	FKDN202654736-1A	NA	NA	nov_2020	Soil	bulk_soil	NA	3	158868	NA	ITS1-1F†	X201SC20123127-Z01-F001	k__Fungi	p__Ascomycota	c__Sordariomycetes	o__Sordariales	f__Lasiosphaeriaceae	Fimetariella
248	SV2	Ti_Roots_6	0.150878	Ti_Roots_6	FKDN202654748-1A	NA	NA	nov_2020	Tipple	roots	NA	5	132836	NA	ITS1-1F†	X201SC20123127-Z01-F001	k__Fungi	p__Basidiomycota	c__Tremellomycetes	o__Tremellales	f__Trimorphomycetaceae	Saitozyma
10	SV1	Che_Roots_4	0.14853	Che_Roots_4	FKDN202654756-1A	NA	NA	nov_2020	Chevallier	roots	NA	3	168529	NA	ITS1-1F†	X201SC20123127-Z01-F001	k__Fungi	p__Basidiomycota	c__Tremellomycetes	o__Trichosporonales	f__Trichosporonaceae	Apiotrichum
234	SV2	Soil_5	0.147313	Soil_5	FKDN202654738-1A	NA	NA	nov_2020	Soil	bulk_soil	NA	5	160871	NA	ITS1-1F†	X201SC20123127-Z01-F001	k__Fungi	p__Basidiomycota	c__Tremellomycetes	o__Tremellales	f__Trimorphomycetaceae	Saitozyma
338	SV4	Soil_5	0.132586	Soil_5	FKDN202654738-1A	NA	NA	nov_2020	Soil	bulk_soil	NA	5	160871	NA	ITS1-1F†	X201SC20123127-Z01-F001	k__Fungi	p__Ascomycota	c__Saccharomycetes	o__Saccharomycetales	f__Saccharomycetales_fam_Incertae_sedis	Candida
235	SV2	Ti_Roots_5	0.129323	Ti_Roots_5	FKDN202654747-1A	NA	NA	nov_2020	Tipple	roots	NA	4	147810	NA	ITS1-1F†	X201SC20123127-Z01-F001	k__Fungi	p__Basidiomycota	c__Tremellomycetes	o__Tremellales	f__Trimorphomycetaceae	Saitozyma
481	SV50	Che_Rhiz_3	0.127595	Che_Rhiz_3	FKDN202654750-1A	NA	NA	nov_2020	Chevallier	rhizosphere	NA	2	148574	NA	ITS1-1F†	X201SC20123127-Z01-F001	k__Fungi	p__Ascomycota	c__Sordariomycetes	o__Myrmecridiales	f__Myrmecridiales_fam_Incertae_sedis	Goidanichiella
341	SV4	Ti_Rhiz_1	0.123742	Ti_Rhiz_1	FKDN202654739-1A	NA	NA	nov_2020	Tipple	rhizosphere	NA	1	140148	NA	ITS1-1F†	X201SC20123127-Z01-F001	k__Fungi	p__Ascomycota	c__Saccharomycetes	o__Saccharomycetales	f__Saccharomycetales_fam_Incertae_sedis	Candida
340	SV4	Che_Rhiz_5	0.123364	Che_Rhiz_5	FKDN202654752-1A	NA	NA	nov_2020	Chevallier	rhizosphere	NA	4	142946	NA	ITS1-1F†	X201SC20123127-Z01-F001	k__Fungi	p__Ascomycota	c__Saccharomycetes	o__Saccharomycetales	f__Saccharomycetales_fam_Incertae_sedis	Candida
247	SV2	Soil_3	0.11637	Soil_3	FKDN202654736-1A	NA	NA	nov_2020	Soil	bulk_soil	NA	3	158868	NA	ITS1-1F†	X201SC20123127-Z01-F001	k__Fungi	p__Basidiomycota	c__Tremellomycetes	o__Tremellales	f__Trimorphomycetaceae	Saitozyma
346	SV4	Ti_Rhiz_5	0.115844	Ti_Rhiz_5	FKDN202654742-1A	NA	NA	nov_2020	Tipple	rhizosphere	NA	4	137928	NA	ITS1-1F†	X201SC20123127-Z01-F001	k__Fungi	p__Ascomycota	c__Saccharomycetes	o__Saccharomycetales	f__Saccharomycetales_fam_Incertae_sedis	Candida
350	SV4	Soil_3	0.113204	Soil_3	FKDN202654736-1A	NA	NA	nov_2020	Soil	bulk_soil	NA	3	158868	NA	ITS1-1F†	X201SC20123127-Z01-F001	k__Fungi	p__Ascomycota	c__Saccharomycetes	o__Saccharomycetales	f__Saccharomycetales_fam_Incertae_sedis	Candida
250	SV2	Che_Roots_6	0.111243	Che_Roots_6	FKDN202654758-1A	NA	NA	nov_2020	Chevallier	roots	NA	5	159052	NA	ITS1-1F†	X201SC20123127-Z01-F001	k__Fungi	p__Basidiomycota	c__Tremellomycetes	o__Tremellales	f__Trimorphomycetaceae	Saitozyma
18	SV1	Che_Rhiz_3	0.110978	Che_Rhiz_3	FKDN202654750-1A	NA	NA	nov_2020	Chevallier	rhizosphere	NA	2	148574	NA	ITS1-1F†	X201SC20123127-Z01-F001	k__Fungi	p__Basidiomycota	c__Tremellomycetes	o__Trichosporonales	f__Trichosporonaceae	Apiotrichum
19	SV1	Soil_1	0.108883	Soil_1	FKDN202654734-1A	NA	NA	nov_2020	Soil	bulk_soil	NA	1	168870	NA	ITS1-1F†	X201SC20123127-Z01-F001	k__Fungi	p__Basidiomycota	c__Tremellomycetes	o__Trichosporonales	f__Trichosporonaceae	Apiotrichum
240	SV2	Ti_Roots_1	0.108001	Ti_Roots_1	FKDN202654744-1A	NA	NA	nov_2020	Tipple	roots	NA	1	138221	NA	ITS1-1F†	X201SC20123127-Z01-F001	k__Fungi	p__Basidiomycota	c__Tremellomycetes	o__Tremellales	f__Trimorphomycetaceae	Saitozyma
244	SV2	Soil_1	0.107459	Soil_1	FKDN202654734-1A	NA	NA	nov_2020	Soil	bulk_soil	NA	1	168870	NA	ITS1-1F†	X201SC20123127-Z01-F001	k__Fungi	p__Basidiomycota	c__Tremellomycetes	o__Tremellales	f__Trimorphomycetaceae	Saitozyma
62	SV12	Ti_Rhiz_1	0.106114	Ti_Rhiz_1	FKDN202654739-1A	NA	NA	nov_2020	Tipple	rhizosphere	NA	1	140148	NA	ITS1-1F†	X201SC20123127-Z01-F001	k__Fungi	p__Ascomycota	c__Eurotiomycetes	o__Eurotiales	f__Aspergillaceae	Penicillium
339	SV4	Soil_1	0.101707	Soil_1	FKDN202654734-1A	NA	NA	nov_2020	Soil	bulk_soil	NA	1	168870	NA	ITS1-1F†	X201SC20123127-Z01-F001	k__Fungi	p__Ascomycota	c__Saccharomycetes	o__Saccharomycetales	f__Saccharomycetales_fam_Incertae_sedis	Candida
57	SV12	Ti_Rhiz_2	0.0977205	Ti_Rhiz_2	FKDN202654740-1A	NA	NA	nov_2020	Tipple	rhizosphere	NA	2	145607	NA	ITS1-1F†	X201SC20123127-Z01-F001	k__Fungi	p__Ascomycota	c__Eurotiomycetes	o__Eurotiales	f__Aspergillaceae	Penicillium
58	SV12	Ti_Rhiz_6	0.0959957	Ti_Rhiz_6	FKDN202654743-1A	NA	NA	nov_2020	Tipple	rhizosphere	NA	5	163472	NA	ITS1-1F†	X201SC20123127-Z01-F001	k__Fungi	p__Ascomycota	c__Eurotiomycetes	o__Eurotiales	f__Aspergillaceae	Penicillium
66	SV12	Ti_Rhiz_4	0.095457	Ti_Rhiz_4	FKDN202654741-1A	NA	NA	nov_2020	Tipple	rhizosphere	NA	3	155460	NA	ITS1-1F†	X201SC20123127-Z01-F001	k__Fungi	p__Ascomycota	c__Eurotiomycetes	o__Eurotiales	f__Aspergillaceae	Penicillium
233	SV2	Ti_Rhiz_5	0.0917088	Ti_Rhiz_5	FKDN202654742-1A	NA	NA	nov_2020	Tipple	rhizosphere	NA	4	137928	NA	ITS1-1F†	X201SC20123127-Z01-F001	k__Fungi	p__Basidiomycota	c__Tremellomycetes	o__Tremellales	f__Trimorphomycetaceae	Saitozyma
333	SV4	Soil_2	0.0904225	Soil_2	FKDN202654735-1A	NA	NA	nov_2020	Soil	bulk_soil	NA	2	139968	NA	ITS1-1F†	X201SC20123127-Z01-F001	k__Fungi	p__Ascomycota	c__Saccharomycetes	o__Saccharomycetales	f__Saccharomycetales_fam_Incertae_sedis	Candida
230	SV2	Ti_Rhiz_4	0.0891786	Ti_Rhiz_4	FKDN202654741-1A	NA	NA	nov_2020	Tipple	rhizosphere	NA	3	155460	NA	ITS1-1F†	X201SC20123127-Z01-F001	k__Fungi	p__Basidiomycota	c__Tremellomycetes	o__Tremellales	f__Trimorphomycetaceae	Saitozyma
468	SV5	Che_Roots_5	0.0883294	Che_Roots_5	FKDN202654757-1A	NA	NA	nov_2020	Chevallier	roots	NA	4	153857	NA	ITS1-1F†	X201SC20123127-Z01-F001	k__Fungi	p__Ascomycota	c__Sordariomycetes	o__Sordariales	f__Lasiosphaeriaceae	Fimetariella
238	SV2	Soil_2	0.0847876	Soil_2	FKDN202654735-1A	NA	NA	nov_2020	Soil	bulk_soil	NA	2	139968	NA	ITS1-1F†	X201SC20123127-Z01-F001	k__Fungi	p__Basidiomycota	c__Tremellomycetes	o__Tremellales	f__Trimorphomycetaceae	Saitozyma
126	SV13	Che_Rhiz_2	0.0814384	Che_Rhiz_2	FKDN202654749-1A	NA	NA	nov_2020	Chevallier	rhizosphere	NA	1	157371	NA	ITS1-1F†	X201SC20123127-Z01-F001	k__Fungi	p__Ascomycota	c__Sordariomycetes	o__Conioscyphales	f__Conioscyphaceae	Conioscypha
70	SV12	Soil_2	0.0802458	Soil_2	FKDN202654735-1A	NA	NA	nov_2020	Soil	bulk_soil	NA	2	139968	NA	ITS1-1F†	X201SC20123127-Z01-F001	k__Fungi	p__Ascomycota	c__Eurotiomycetes	o__Eurotiales	f__Aspergillaceae	Penicillium
347	SV4	Ti_Rhiz_4	0.0761974	Ti_Rhiz_4	FKDN202654741-1A	NA	NA	nov_2020	Tipple	rhizosphere	NA	3	155460	NA	ITS1-1F†	X201SC20123127-Z01-F001	k__Fungi	p__Ascomycota	c__Saccharomycetes	o__Saccharomycetales	f__Saccharomycetales_fam_Incertae_sedis	Candida
255	SV20	Ti_Rhiz_1	0.0694907	Ti_Rhiz_1	FKDN202654739-1A	NA	NA	nov_2020	Tipple	rhizosphere	NA	1	140148	NA	ITS1-1F†	X201SC20123127-Z01-F001	k__Fungi	p__Ascomycota	c__Leotiomycetes	o__Helotiales	f__Myxotrichaceae	Oidiodendron
64	SV12	Ti_Rhiz_5	0.0685677	Ti_Rhiz_5	FKDN202654742-1A	NA	NA	nov_2020	Tipple	rhizosphere	NA	4	137928	NA	ITS1-1F†	X201SC20123127-Z01-F001	k__Fungi	p__Ascomycota	c__Eurotiomycetes	o__Eurotiales	f__Aspergillaceae	Penicillium
371	SV42	Che_Roots_6	0.0674698	Che_Roots_6	FKDN202654758-1A	NA	NA	nov_2020	Chevallier	roots	NA	5	159052	NA	ITS1-1F†	X201SC20123127-Z01-F001	k__Fungi	p__Ascomycota	c__Sordariomycetes	o__Phomatosporales	f__Phomatosporaceae	Phomatospora
67	SV12	Soil_1	0.0670746	Soil_1	FKDN202654734-1A	NA	NA	nov_2020	Soil	bulk_soil	NA	1	168870	NA	ITS1-1F†	X201SC20123127-Z01-F001	k__Fungi	p__Ascomycota	c__Eurotiomycetes	o__Eurotiales	f__Aspergillaceae	Penicillium
335	SV4	Soil_4	0.0670011	Soil_4	FKDN202654737-1A	NA	NA	nov_2020	Soil	bulk_soil	NA	4	134188	NA	ITS1-1F†	X201SC20123127-Z01-F001	k__Fungi	p__Ascomycota	c__Saccharomycetes	o__Saccharomycetales	f__Saccharomycetales_fam_Incertae_sedis	Candida
236	SV2	Ti_Rhiz_6	0.0661631	Ti_Rhiz_6	FKDN202654743-1A	NA	NA	nov_2020	Tipple	rhizosphere	NA	5	163472	NA	ITS1-1F†	X201SC20123127-Z01-F001	k__Fungi	p__Basidiomycota	c__Tremellomycetes	o__Tremellales	f__Trimorphomycetaceae	Saitozyma
477	SV50	Che_Rhiz_4	0.066101	Che_Rhiz_4	FKDN202654751-1A	NA	NA	nov_2020	Chevallier	rhizosphere	NA	3	143428	NA	ITS1-1F†	X201SC20123127-Z01-F001	k__Fungi	p__Ascomycota	c__Sordariomycetes	o__Myrmecridiales	f__Myrmecridiales_fam_Incertae_sedis	Goidanichiella
718	SV9	Ti_Rhiz_2	0.0640678	Ti_Rhiz_2	FKDN202654740-1A	NA	NA	nov_2020	Tipple	rhizosphere	NA	2	145607	NA	ITS1-1F†	X201SC20123127-Z01-F001	k__Fungi	p__Ascomycota	c__Sordariomycetes	o__Hypocreales	f__Hypocreaceae	Trichoderma
462	SV5	Soil_1	0.0637945	Soil_1	FKDN202654734-1A	NA	NA	nov_2020	Soil	bulk_soil	NA	1	168870	NA	ITS1-1F†	X201SC20123127-Z01-F001	k__Fungi	p__Ascomycota	c__Sordariomycetes	o__Sordariales	f__Lasiosphaeriaceae	Fimetariella
277	SV26	Ti_Rhiz_6	0.0617679	Ti_Rhiz_6	FKDN202654743-1A	NA	NA	nov_2020	Tipple	rhizosphere	NA	5	163472	NA	ITS1-1F†	X201SC20123127-Z01-F001	k__Fungi	p__Ascomycota	c__Leotiomycetes	o__Helotiales	f__Helotiaceae	Meliniomyces
237	SV2	Ti_Rhiz_1	0.0608937	Ti_Rhiz_1	FKDN202654739-1A	NA	NA	nov_2020	Tipple	rhizosphere	NA	1	140148	NA	ITS1-1F†	X201SC20123127-Z01-F001	k__Fungi	p__Basidiomycota	c__Tremellomycetes	o__Tremellales	f__Trimorphomycetaceae	Saitozyma
464	SV5	Soil_4	0.0585373	Soil_4	FKDN202654737-1A	NA	NA	nov_2020	Soil	bulk_soil	NA	4	134188	NA	ITS1-1F†	X201SC20123127-Z01-F001	k__Fungi	p__Ascomycota	c__Sordariomycetes	o__Sordariales	f__Lasiosphaeriaceae	Fimetariella
469	SV5	Soil_2	0.0559251	Soil_2	FKDN202654735-1A	NA	NA	nov_2020	Soil	bulk_soil	NA	2	139968	NA	ITS1-1F†	X201SC20123127-Z01-F001	k__Fungi	p__Ascomycota	c__Sordariomycetes	o__Sordariales	f__Lasiosphaeriaceae	Fimetariella
54	SV12	Che_Rhiz_5	0.0557064	Che_Rhiz_5	FKDN202654752-1A	NA	NA	nov_2020	Chevallier	rhizosphere	NA	4	142946	NA	ITS1-1F†	X201SC20123127-Z01-F001	k__Fungi	p__Ascomycota	c__Eurotiomycetes	o__Eurotiales	f__Aspergillaceae	Penicillium
472	SV5	Ti_Rhiz_4	0.0556405	Ti_Rhiz_4	FKDN202654741-1A	NA	NA	nov_2020	Tipple	rhizosphere	NA	3	155460	NA	ITS1-1F†	X201SC20123127-Z01-F001	k__Fungi	p__Ascomycota	c__Sordariomycetes	o__Sordariales	f__Lasiosphaeriaceae	Fimetariella
467	SV5	Soil_5	0.0535121	Soil_5	FKDN202654738-1A	NA	NA	nov_2020	Soil	bulk_soil	NA	5	160871	NA	ITS1-1F†	X201SC20123127-Z01-F001	k__Fungi	p__Ascomycota	c__Sordariomycetes	o__Sordariales	f__Lasiosphaeriaceae	Fimetariella
417	SV48	Che_Roots_6	0.0531374	Che_Roots_6	FKDN202654758-1A	NA	NA	nov_2020	Chevallier	roots	NA	5	159052	NA	ITS1-1F†	X201SC20123127-Z01-F001	k__Fungi	p__Ascomycota	c__Sordariomycetes	o__Sordariales	f__Chaetomiaceae	Chaetomium
65	SV12	Soil_3	0.0512074	Soil_3	FKDN202654736-1A	NA	NA	nov_2020	Soil	bulk_soil	NA	3	158868	NA	ITS1-1F†	X201SC20123127-Z01-F001	k__Fungi	p__Ascomycota	c__Eurotiomycetes	o__Eurotiales	f__Aspergillaceae	Penicillium
273	SV20	Ti_Rhiz_4	0.0500428	Ti_Rhiz_4	FKDN202654741-1A	NA	NA	nov_2020	Tipple	rhizosphere	NA	3	155460	NA	ITS1-1F†	X201SC20123127-Z01-F001	k__Fungi	p__Ascomycota	c__Leotiomycetes	o__Helotiales	f__Myxotrichaceae	Oidiodendron
271	SV20	Ti_Rhiz_6	0.0491669	Ti_Rhiz_6	FKDN202654743-1A	NA	NA	nov_2020	Tipple	rhizosphere	NA	5	163472	NA	ITS1-1F†	X201SC20123127-Z01-F001	k__Fungi	p__Ascomycota	c__Leotiomycetes	o__Helotiales	f__Myxotrichaceae	Oidiodendron
287	SV26	Ti_Rhiz_4	0.0455343	Ti_Rhiz_4	FKDN202654741-1A	NA	NA	nov_2020	Tipple	rhizosphere	NA	3	155460	NA	ITS1-1F†	X201SC20123127-Z01-F001	k__Fungi	p__Ascomycota	c__Leotiomycetes	o__Helotiales	f__Helotiaceae	Meliniomyces
488	SV50	Che_Roots_2	0.0447329	Che_Roots_2	FKDN202654754-1A	NA	NA	nov_2020	Chevallier	roots	NA	1	169149	NA	ITS1-1F†	X201SC20123127-Z01-F001	k__Fungi	p__Ascomycota	c__Sordariomycetes	o__Myrmecridiales	f__Myrmecridiales_fam_Incertae_sedis	Goidanichiella
138	SV13	Ti_Roots_4	0.0430311	Ti_Roots_4	FKDN202654746-1A	NA	NA	nov_2020	Tipple	roots	NA	3	151349	NA	ITS1-1F†	X201SC20123127-Z01-F001	k__Fungi	p__Ascomycota	c__Sordariomycetes	o__Conioscyphales	f__Conioscyphaceae	Conioscypha
167	SV15	Soil_2	0.0421488	Soil_2	FKDN202654735-1A	NA	NA	nov_2020	Soil	bulk_soil	NA	2	139968	NA	ITS1-1F†	X201SC20123127-Z01-F001	k__Fungi	p__Basidiomycota	c__Agaricomycetes	o__Auriculariales	f__Exidiaceae	Basidiodendron
59	SV12	Soil_5	0.0417161	Soil_5	FKDN202654738-1A	NA	NA	nov_2020	Soil	bulk_soil	NA	5	160871	NA	ITS1-1F†	X201SC20123127-Z01-F001	k__Fungi	p__Ascomycota	c__Eurotiomycetes	o__Eurotiales	f__Aspergillaceae	Penicillium
239	SV2	Che_Roots_4	0.0410481	Che_Roots_4	FKDN202654756-1A	NA	NA	nov_2020	Chevallier	roots	NA	3	168529	NA	ITS1-1F†	X201SC20123127-Z01-F001	k__Fungi	p__Basidiomycota	c__Tremellomycetes	o__Tremellales	f__Trimorphomycetaceae	Saitozyma
144	SV13	Che_Roots_2	0.0393292	Che_Roots_2	FKDN202654754-1A	NA	NA	nov_2020	Chevallier	roots	NA	1	169149	NA	ITS1-1F†	X201SC20123127-Z01-F001	k__Fungi	p__Ascomycota	c__Sordariomycetes	o__Conioscyphales	f__Conioscyphaceae	Conioscypha
60	SV12	Soil_4	0.0389676	Soil_4	FKDN202654737-1A	NA	NA	nov_2020	Soil	bulk_soil	NA	4	134188	NA	ITS1-1F†	X201SC20123127-Z01-F001	k__Fungi	p__Ascomycota	c__Eurotiomycetes	o__Eurotiales	f__Aspergillaceae	Penicillium
720	SV9	Ti_Rhiz_6	0.0370517	Ti_Rhiz_6	FKDN202654743-1A	NA	NA	nov_2020	Tipple	rhizosphere	NA	5	163472	NA	ITS1-1F†	X201SC20123127-Z01-F001	k__Fungi	p__Ascomycota	c__Sordariomycetes	o__Hypocreales	f__Hypocreaceae	Trichoderma
466	SV5	Ti_Rhiz_1	0.036795	Ti_Rhiz_1	FKDN202654739-1A	NA	NA	nov_2020	Tipple	rhizosphere	NA	1	140148	NA	ITS1-1F†	X201SC20123127-Z01-F001	k__Fungi	p__Ascomycota	c__Sordariomycetes	o__Sordariales	f__Lasiosphaeriaceae	Fimetariella
496	SV50	Ti_Roots_4	0.0357408	Ti_Roots_4	FKDN202654746-1A	NA	NA	nov_2020	Tipple	roots	NA	3	151349	NA	ITS1-1F†	X201SC20123127-Z01-F001	k__Fungi	p__Ascomycota	c__Sordariomycetes	o__Myrmecridiales	f__Myrmecridiales_fam_Incertae_sedis	Goidanichiella
161	SV15	Soil_4	0.034725	Soil_4	FKDN202654737-1A	NA	NA	nov_2020	Soil	bulk_soil	NA	4	134188	NA	ITS1-1F†	X201SC20123127-Z01-F001	k__Fungi	p__Basidiomycota	c__Agaricomycetes	o__Auriculariales	f__Exidiaceae	Basidiodendron
451	SV5	Che_Roots_4	0.033808	Che_Roots_4	FKDN202654756-1A	NA	NA	nov_2020	Chevallier	roots	NA	3	168529	NA	ITS1-1F†	X201SC20123127-Z01-F001	k__Fungi	p__Ascomycota	c__Sordariomycetes	o__Sordariales	f__Lasiosphaeriaceae	Fimetariella
163	SV15	Ti_Rhiz_1	0.0335734	Ti_Rhiz_1	FKDN202654739-1A	NA	NA	nov_2020	Tipple	rhizosphere	NA	1	140148	NA	ITS1-1F†	X201SC20123127-Z01-F001	k__Fungi	p__Basidiomycota	c__Agaricomycetes	o__Auriculariales	f__Exidiaceae	Basidiodendron
293	SV26	Ti_Rhiz_1	0.0331119	Ti_Rhiz_1	FKDN202654739-1A	NA	NA	nov_2020	Tipple	rhizosphere	NA	1	140148	NA	ITS1-1F†	X201SC20123127-Z01-F001	k__Fungi	p__Ascomycota	c__Leotiomycetes	o__Helotiales	f__Helotiaceae	Meliniomyces
259	SV20	Soil_2	0.0312182	Soil_2	FKDN202654735-1A	NA	NA	nov_2020	Soil	bulk_soil	NA	2	139968	NA	ITS1-1F†	X201SC20123127-Z01-F001	k__Fungi	p__Ascomycota	c__Leotiomycetes	o__Helotiales	f__Myxotrichaceae	Oidiodendron
505	SV51	Soil_1	0.0296204	Soil_1	FKDN202654734-1A	NA	NA	nov_2020	Soil	bulk_soil	NA	1	168870	NA	ITS1-1F†	X201SC20123127-Z01-F001	k__Fungi	p__Ascomycota	c__Eurotiomycetes	o__Eurotiales	f__Trichocomaceae	Rasamsonia
289	SV26	Ti_Roots_1	0.0291865	Ti_Roots_1	FKDN202654744-1A	NA	NA	nov_2020	Tipple	roots	NA	1	138221	NA	ITS1-1F†	X201SC20123127-Z01-F001	k__Fungi	p__Ascomycota	c__Leotiomycetes	o__Helotiales	f__Helotiaceae	Meliniomyces
152	SV15	Che_Roots_4	0.0291432	Che_Roots_4	FKDN202654756-1A	NA	NA	nov_2020	Chevallier	roots	NA	3	168529	NA	ITS1-1F†	X201SC20123127-Z01-F001	k__Fungi	p__Basidiomycota	c__Agaricomycetes	o__Auriculariales	f__Exidiaceae	Basidiodendron
478	SV50	Che_Rhiz_2	0.0287479	Che_Rhiz_2	FKDN202654749-1A	NA	NA	nov_2020	Chevallier	rhizosphere	NA	1	157371	NA	ITS1-1F†	X201SC20123127-Z01-F001	k__Fungi	p__Ascomycota	c__Sordariomycetes	o__Myrmecridiales	f__Myrmecridiales_fam_Incertae_sedis	Goidanichiella
55	SV12	Che_Roots_4	0.0280948	Che_Roots_4	FKDN202654756-1A	NA	NA	nov_2020	Chevallier	roots	NA	3	168529	NA	ITS1-1F†	X201SC20123127-Z01-F001	k__Fungi	p__Ascomycota	c__Eurotiomycetes	o__Eurotiales	f__Aspergillaceae	Penicillium
613	SV64	Che_Roots_5	0.0266339	Che_Roots_5	FKDN202654757-1A	NA	NA	nov_2020	Chevallier	roots	NA	4	153857	NA	ITS1-1F†	X201SC20123127-Z01-F001	k__Fungi	p__Ascomycota	c__Sordariomycetes	o__Sordariales	f__Cephalothecaceae	Phialemonium
170	SV15	Soil_3	0.0255356	Soil_3	FKDN202654736-1A	NA	NA	nov_2020	Soil	bulk_soil	NA	3	158868	NA	ITS1-1F†	X201SC20123127-Z01-F001	k__Fungi	p__Basidiomycota	c__Agaricomycetes	o__Auriculariales	f__Exidiaceae	Basidiodendron
474	SV5	Ti_Rhiz_5	0.0249644	Ti_Rhiz_5	FKDN202654742-1A	NA	NA	nov_2020	Tipple	rhizosphere	NA	4	137928	NA	ITS1-1F†	X201SC20123127-Z01-F001	k__Fungi	p__Ascomycota	c__Sordariomycetes	o__Sordariales	f__Lasiosphaeriaceae	Fimetariella
454	SV5	Che_Rhiz_5	0.0249224	Che_Rhiz_5	FKDN202654752-1A	NA	NA	nov_2020	Chevallier	rhizosphere	NA	4	142946	NA	ITS1-1F†	X201SC20123127-Z01-F001	k__Fungi	p__Ascomycota	c__Sordariomycetes	o__Sordariales	f__Lasiosphaeriaceae	Fimetariella
531	SV54	Che_Rhiz_4	0.0247632	Che_Rhiz_4	FKDN202654751-1A	NA	NA	nov_2020	Chevallier	rhizosphere	NA	3	143428	NA	ITS1-1F†	X201SC20123127-Z01-F001	k__Fungi	p__Ascomycota	c__Archaeorhizomycetes	o__Archaeorhizomycetales	f__Archaeorhizomycetaceae	Archaeorhizomyces
646	SV70	Che_Roots_6	0.0243927	Che_Roots_6	FKDN202654758-1A	NA	NA	nov_2020	Chevallier	roots	NA	5	159052	NA	ITS1-1F†	X201SC20123127-Z01-F001	k__Fungi	p__Ascomycota	c__Eurotiomycetes	o__Eurotiales	f__Trichocomaceae	Talaromyces
150	SV13	Ti_Rhiz_4	0.0240644	Ti_Rhiz_4	FKDN202654741-1A	NA	NA	nov_2020	Tipple	rhizosphere	NA	3	155460	NA	ITS1-1F†	X201SC20123127-Z01-F001	k__Fungi	p__Ascomycota	c__Sordariomycetes	o__Conioscyphales	f__Conioscyphaceae	Conioscypha
470	SV5	Ti_Rhiz_6	0.0225832	Ti_Rhiz_6	FKDN202654743-1A	NA	NA	nov_2020	Tipple	rhizosphere	NA	5	163472	NA	ITS1-1F†	X201SC20123127-Z01-F001	k__Fungi	p__Ascomycota	c__Sordariomycetes	o__Sordariales	f__Lasiosphaeriaceae	Fimetariella
484	SV50	Soil_5	0.0217054	Soil_5	FKDN202654738-1A	NA	NA	nov_2020	Soil	bulk_soil	NA	5	160871	NA	ITS1-1F†	X201SC20123127-Z01-F001	k__Fungi	p__Ascomycota	c__Sordariomycetes	o__Myrmecridiales	f__Myrmecridiales_fam_Incertae_sedis	Goidanichiella
345	SV4	Che_Roots_6	0.0215349	Che_Roots_6	FKDN202654758-1A	NA	NA	nov_2020	Chevallier	roots	NA	5	159052	NA	ITS1-1F†	X201SC20123127-Z01-F001	k__Fungi	p__Ascomycota	c__Saccharomycetes	o__Saccharomycetales	f__Saccharomycetales_fam_Incertae_sedis	Candida
327	SV4	Che_Roots_5	0.0213202	Che_Roots_5	FKDN202654757-1A	NA	NA	nov_2020	Chevallier	roots	NA	4	153857	NA	ITS1-1F†	X201SC20123127-Z01-F001	k__Fungi	p__Ascomycota	c__Saccharomycetes	o__Saccharomycetales	f__Saccharomycetales_fam_Incertae_sedis	Candida
275	SV20	Ti_Rhiz_5	0.0206006	Ti_Rhiz_5	FKDN202654742-1A	NA	NA	nov_2020	Tipple	rhizosphere	NA	4	137928	NA	ITS1-1F†	X201SC20123127-Z01-F001	k__Fungi	p__Ascomycota	c__Leotiomycetes	o__Helotiales	f__Myxotrichaceae	Oidiodendron
164	SV15	Soil_5	0.0203446	Soil_5	FKDN202654738-1A	NA	NA	nov_2020	Soil	bulk_soil	NA	5	160871	NA	ITS1-1F†	X201SC20123127-Z01-F001	k__Fungi	p__Basidiomycota	c__Agaricomycetes	o__Auriculariales	f__Exidiaceae	Basidiodendron
140	SV13	Soil_5	0.0202528	Soil_5	FKDN202654738-1A	NA	NA	nov_2020	Soil	bulk_soil	NA	5	160871	NA	ITS1-1F†	X201SC20123127-Z01-F001	k__Fungi	p__Ascomycota	c__Sordariomycetes	o__Conioscyphales	f__Conioscyphaceae	Conioscypha
498	SV50	Ti_Roots_6	0.0193153	Ti_Roots_6	FKDN202654748-1A	NA	NA	nov_2020	Tipple	roots	NA	5	132836	NA	ITS1-1F†	X201SC20123127-Z01-F001	k__Fungi	p__Ascomycota	c__Sordariomycetes	o__Myrmecridiales	f__Myrmecridiales_fam_Incertae_sedis	Goidanichiella
723	SV9	Ti_Roots_1	0.019314	Ti_Roots_1	FKDN202654744-1A	NA	NA	nov_2020	Tipple	roots	NA	1	138221	NA	ITS1-1F†	X201SC20123127-Z01-F001	k__Fungi	p__Ascomycota	c__Sordariomycetes	o__Hypocreales	f__Hypocreaceae	Trichoderma
704	SV9	Ti_Rhiz_1	0.0191848	Ti_Rhiz_1	FKDN202654739-1A	NA	NA	nov_2020	Tipple	rhizosphere	NA	1	140148	NA	ITS1-1F†	X201SC20123127-Z01-F001	k__Fungi	p__Ascomycota	c__Sordariomycetes	o__Hypocreales	f__Hypocreaceae	Trichoderma
486	SV50	Che_Roots_3	0.0188572	Che_Roots_3	FKDN202654755-1A	NA	NA	nov_2020	Chevallier	roots	NA	2	153822	NA	ITS1-1F†	X201SC20123127-Z01-F001	k__Fungi	p__Ascomycota	c__Sordariomycetes	o__Myrmecridiales	f__Myrmecridiales_fam_Incertae_sedis	Goidanichiella
500	SV50	Ti_Roots_2	0.018727	Ti_Roots_2	FKDN202654745-1A	NA	NA	nov_2020	Tipple	roots	NA	2	166122	NA	ITS1-1F†	X201SC20123127-Z01-F001	k__Fungi	p__Ascomycota	c__Sordariomycetes	o__Myrmecridiales	f__Myrmecridiales_fam_Incertae_sedis	Goidanichiella
166	SV15	Ti_Rhiz_4	0.0183466	Ti_Rhiz_4	FKDN202654741-1A	NA	NA	nov_2020	Tipple	rhizosphere	NA	3	155460	NA	ITS1-1F†	X201SC20123127-Z01-F001	k__Fungi	p__Basidiomycota	c__Agaricomycetes	o__Auriculariales	f__Exidiaceae	Basidiodendron
344	SV4	Ti_Roots_1	0.0182695	Ti_Roots_1	FKDN202654744-1A	NA	NA	nov_2020	Tipple	roots	NA	1	138221	NA	ITS1-1F†	X201SC20123127-Z01-F001	k__Fungi	p__Ascomycota	c__Saccharomycetes	o__Saccharomycetales	f__Saccharomycetales_fam_Incertae_sedis	Candida
132	SV13	Che_Roots_5	0.0181334	Che_Roots_5	FKDN202654757-1A	NA	NA	nov_2020	Chevallier	roots	NA	4	153857	NA	ITS1-1F†	X201SC20123127-Z01-F001	k__Fungi	p__Ascomycota	c__Sordariomycetes	o__Conioscyphales	f__Conioscyphaceae	Conioscypha
256	SV20	Soil_1	0.0181069	Soil_1	FKDN202654734-1A	NA	NA	nov_2020	Soil	bulk_soil	NA	1	168870	NA	ITS1-1F†	X201SC20123127-Z01-F001	k__Fungi	p__Ascomycota	c__Leotiomycetes	o__Helotiales	f__Myxotrichaceae	Oidiodendron
292	SV26	Soil_2	0.0179601	Soil_2	FKDN202654735-1A	NA	NA	nov_2020	Soil	bulk_soil	NA	2	139968	NA	ITS1-1F†	X201SC20123127-Z01-F001	k__Fungi	p__Ascomycota	c__Leotiomycetes	o__Helotiales	f__Helotiaceae	Meliniomyces
330	SV4	Ti_Roots_5	0.0177466	Ti_Roots_5	FKDN202654747-1A	NA	NA	nov_2020	Tipple	roots	NA	4	147810	NA	ITS1-1F†	X201SC20123127-Z01-F001	k__Fungi	p__Ascomycota	c__Saccharomycetes	o__Saccharomycetales	f__Saccharomycetales_fam_Incertae_sedis	Candida
463	SV5	Che_Roots_6	0.0174223	Che_Roots_6	FKDN202654758-1A	NA	NA	nov_2020	Chevallier	roots	NA	5	159052	NA	ITS1-1F†	X201SC20123127-Z01-F001	k__Fungi	p__Ascomycota	c__Sordariomycetes	o__Sordariales	f__Lasiosphaeriaceae	Fimetariella
136	SV13	Ti_Roots_6	0.0173014	Ti_Roots_6	FKDN202654748-1A	NA	NA	nov_2020	Tipple	roots	NA	5	132836	NA	ITS1-1F†	X201SC20123127-Z01-F001	k__Fungi	p__Ascomycota	c__Sordariomycetes	o__Conioscyphales	f__Conioscyphaceae	Conioscypha
325	SV27	Ti_Rhiz_4	0.0169853	Ti_Rhiz_4	FKDN202654741-1A	NA	NA	nov_2020	Tipple	rhizosphere	NA	3	155460	NA	ITS1-1F†	X201SC20123127-Z01-F001	k__Fungi	p__Ascomycota	c__Leotiomycetes	o__Helotiales	f__Helotiales_fam_Incertae_sedis	Leptodontidium
68	SV12	Che_Roots_6	0.0168131	Che_Roots_6	FKDN202654758-1A	NA	NA	nov_2020	Chevallier	roots	NA	5	159052	NA	ITS1-1F†	X201SC20123127-Z01-F001	k__Fungi	p__Ascomycota	c__Eurotiomycetes	o__Eurotiales	f__Aspergillaceae	Penicillium
171	SV15	Soil_1	0.01665	Soil_1	FKDN202654734-1A	NA	NA	nov_2020	Soil	bulk_soil	NA	1	168870	NA	ITS1-1F†	X201SC20123127-Z01-F001	k__Fungi	p__Basidiomycota	c__Agaricomycetes	o__Auriculariales	f__Exidiaceae	Basidiodendron
269	SV20	Ti_Rhiz_2	0.0165636	Ti_Rhiz_2	FKDN202654740-1A	NA	NA	nov_2020	Tipple	rhizosphere	NA	2	145607	NA	ITS1-1F†	X201SC20123127-Z01-F001	k__Fungi	p__Ascomycota	c__Leotiomycetes	o__Helotiales	f__Myxotrichaceae	Oidiodendron
310	SV27	Soil_2	0.0165467	Soil_2	FKDN202654735-1A	NA	NA	nov_2020	Soil	bulk_soil	NA	2	139968	NA	ITS1-1F†	X201SC20123127-Z01-F001	k__Fungi	p__Ascomycota	c__Leotiomycetes	o__Helotiales	f__Helotiales_fam_Incertae_sedis	Leptodontidium
710	SV9	Soil_5	0.0163041	Soil_5	FKDN202654738-1A	NA	NA	nov_2020	Soil	bulk_soil	NA	5	160871	NA	ITS1-1F†	X201SC20123127-Z01-F001	k__Fungi	p__Ascomycota	c__Sordariomycetes	o__Hypocreales	f__Hypocreaceae	Trichoderma
711	SV9	Che_Roots_5	0.016217	Che_Roots_5	FKDN202654757-1A	NA	NA	nov_2020	Chevallier	roots	NA	4	153857	NA	ITS1-1F†	X201SC20123127-Z01-F001	k__Fungi	p__Ascomycota	c__Sordariomycetes	o__Hypocreales	f__Hypocreaceae	Trichoderma
303	SV27	Ti_Rhiz_1	0.0160175	Ti_Rhiz_1	FKDN202654739-1A	NA	NA	nov_2020	Tipple	rhizosphere	NA	1	140148	NA	ITS1-1F†	X201SC20123127-Z01-F001	k__Fungi	p__Ascomycota	c__Leotiomycetes	o__Helotiales	f__Helotiales_fam_Incertae_sedis	Leptodontidium
72	SV12	Ti_Roots_1	0.0159568	Ti_Roots_1	FKDN202654744-1A	NA	NA	nov_2020	Tipple	roots	NA	1	138221	NA	ITS1-1F†	X201SC20123127-Z01-F001	k__Fungi	p__Ascomycota	c__Eurotiomycetes	o__Eurotiales	f__Aspergillaceae	Penicillium
476	SV50	Che_Rhiz_6	0.0158485	Che_Rhiz_6	FKDN202654753-1A	NA	NA	nov_2020	Chevallier	rhizosphere	NA	5	152328	NA	ITS1-1F†	X201SC20123127-Z01-F001	k__Fungi	p__Ascomycota	c__Sordariomycetes	o__Myrmecridiales	f__Myrmecridiales_fam_Incertae_sedis	Goidanichiella
705	SV9	Soil_1	0.0156177	Soil_1	FKDN202654734-1A	NA	NA	nov_2020	Soil	bulk_soil	NA	1	168870	NA	ITS1-1F†	X201SC20123127-Z01-F001	k__Fungi	p__Ascomycota	c__Sordariomycetes	o__Hypocreales	f__Hypocreaceae	Trichoderma
154	SV15	Ti_Rhiz_6	0.0148556	Ti_Rhiz_6	FKDN202654743-1A	NA	NA	nov_2020	Tipple	rhizosphere	NA	5	163472	NA	ITS1-1F†	X201SC20123127-Z01-F001	k__Fungi	p__Basidiomycota	c__Agaricomycetes	o__Auriculariales	f__Exidiaceae	Basidiodendron
168	SV15	Ti_Roots_1	0.0147632	Ti_Roots_1	FKDN202654744-1A	NA	NA	nov_2020	Tipple	roots	NA	1	138221	NA	ITS1-1F†	X201SC20123127-Z01-F001	k__Fungi	p__Basidiomycota	c__Agaricomycetes	o__Auriculariales	f__Exidiaceae	Basidiodendron
143	SV13	Che_Roots_3	0.0145841	Che_Roots_3	FKDN202654755-1A	NA	NA	nov_2020	Chevallier	roots	NA	2	153822	NA	ITS1-1F†	X201SC20123127-Z01-F001	k__Fungi	p__Ascomycota	c__Sordariomycetes	o__Conioscyphales	f__Conioscyphaceae	Conioscypha
482	SV50	Ti_Rhiz_2	0.0143019	Ti_Rhiz_2	FKDN202654740-1A	NA	NA	nov_2020	Tipple	rhizosphere	NA	2	145607	NA	ITS1-1F†	X201SC20123127-Z01-F001	k__Fungi	p__Ascomycota	c__Sordariomycetes	o__Myrmecridiales	f__Myrmecridiales_fam_Incertae_sedis	Goidanichiella
489	SV50	Ti_Rhiz_5	0.0142839	Ti_Rhiz_5	FKDN202654742-1A	NA	NA	nov_2020	Tipple	rhizosphere	NA	4	137928	NA	ITS1-1F†	X201SC20123127-Z01-F001	k__Fungi	p__Ascomycota	c__Sordariomycetes	o__Myrmecridiales	f__Myrmecridiales_fam_Incertae_sedis	Goidanichiella
399	SV43	Ti_Rhiz_4	0.0140863	Ti_Rhiz_4	FKDN202654741-1A	NA	NA	nov_2020	Tipple	rhizosphere	NA	3	155460	NA	ITS1-1F†	X201SC20123127-Z01-F001	k__Fungi	p__Ascomycota	c__Sordariomycetes	o__Hypocreales	f__Hypocreales_fam_Incertae_sedis	Acremonium
135	SV13	Ti_Roots_2	0.0140205	Ti_Roots_2	FKDN202654745-1A	NA	NA	nov_2020	Tipple	roots	NA	2	166122	NA	ITS1-1F†	X201SC20123127-Z01-F001	k__Fungi	p__Ascomycota	c__Sordariomycetes	o__Conioscyphales	f__Conioscyphaceae	Conioscypha
252	SV20	Soil_3	0.0137166	Soil_3	FKDN202654736-1A	NA	NA	nov_2020	Soil	bulk_soil	NA	3	158868	NA	ITS1-1F†	X201SC20123127-Z01-F001	k__Fungi	p__Ascomycota	c__Leotiomycetes	o__Helotiales	f__Myxotrichaceae	Oidiodendron
253	SV20	Che_Rhiz_5	0.01363	Che_Rhiz_5	FKDN202654752-1A	NA	NA	nov_2020	Chevallier	rhizosphere	NA	4	142946	NA	ITS1-1F†	X201SC20123127-Z01-F001	k__Fungi	p__Ascomycota	c__Leotiomycetes	o__Helotiales	f__Myxotrichaceae	Oidiodendron
722	SV9	Ti_Rhiz_4	0.0135097	Ti_Rhiz_4	FKDN202654741-1A	NA	NA	nov_2020	Tipple	rhizosphere	NA	3	155460	NA	ITS1-1F†	X201SC20123127-Z01-F001	k__Fungi	p__Ascomycota	c__Sordariomycetes	o__Hypocreales	f__Hypocreaceae	Trichoderma
708	SV9	Soil_2	0.0134842	Soil_2	FKDN202654735-1A	NA	NA	nov_2020	Soil	bulk_soil	NA	2	139968	NA	ITS1-1F†	X201SC20123127-Z01-F001	k__Fungi	p__Ascomycota	c__Sordariomycetes	o__Hypocreales	f__Hypocreaceae	Trichoderma
305	SV27	Soil_3	0.0134613	Soil_3	FKDN202654736-1A	NA	NA	nov_2020	Soil	bulk_soil	NA	3	158868	NA	ITS1-1F†	X201SC20123127-Z01-F001	k__Fungi	p__Ascomycota	c__Leotiomycetes	o__Helotiales	f__Helotiales_fam_Incertae_sedis	Leptodontidium
571	SV57	Ti_Rhiz_6	0.0133222	Ti_Rhiz_6	FKDN202654743-1A	NA	NA	nov_2020	Tipple	rhizosphere	NA	5	163472	NA	ITS1-1F†	X201SC20123127-Z01-F001	k__Fungi	p__Mortierellomycota	c__Mortierellomycetes	o__Mortierellales	f__Mortierellaceae	Mortierella
294	SV26	Soil_1	0.0131202	Soil_1	FKDN202654734-1A	NA	NA	nov_2020	Soil	bulk_soil	NA	1	168870	NA	ITS1-1F†	X201SC20123127-Z01-F001	k__Fungi	p__Ascomycota	c__Leotiomycetes	o__Helotiales	f__Helotiaceae	Meliniomyces
382	SV43	Ti_Rhiz_1	0.0130222	Ti_Rhiz_1	FKDN202654739-1A	NA	NA	nov_2020	Tipple	rhizosphere	NA	1	140148	NA	ITS1-1F†	X201SC20123127-Z01-F001	k__Fungi	p__Ascomycota	c__Sordariomycetes	o__Hypocreales	f__Hypocreales_fam_Incertae_sedis	Acremonium
665	SV73	Soil_2	0.0129	Soil_2	FKDN202654735-1A	NA	NA	nov_2020	Soil	bulk_soil	NA	2	139968	NA	ITS1-1F†	X201SC20123127-Z01-F001	k__Fungi	p__Basidiomycota	c__Agaricomycetes	o__Agaricales	f__Strophariaceae	Galerina
703	SV9	Soil_3	0.0126785	Soil_3	FKDN202654736-1A	NA	NA	nov_2020	Soil	bulk_soil	NA	3	158868	NA	ITS1-1F†	X201SC20123127-Z01-F001	k__Fungi	p__Ascomycota	c__Sordariomycetes	o__Hypocreales	f__Hypocreaceae	Trichoderma
461	SV5	Ti_Rhiz_2	0.0124813	Ti_Rhiz_2	FKDN202654740-1A	NA	NA	nov_2020	Tipple	rhizosphere	NA	2	145607	NA	ITS1-1F†	X201SC20123127-Z01-F001	k__Fungi	p__Ascomycota	c__Sordariomycetes	o__Sordariales	f__Lasiosphaeriaceae	Fimetariella
702	SV9	Che_Rhiz_5	0.0123821	Che_Rhiz_5	FKDN202654752-1A	NA	NA	nov_2020	Chevallier	rhizosphere	NA	4	142946	NA	ITS1-1F†	X201SC20123127-Z01-F001	k__Fungi	p__Ascomycota	c__Sordariomycetes	o__Hypocreales	f__Hypocreaceae	Trichoderma
311	SV27	Soil_1	0.0121628	Soil_1	FKDN202654734-1A	NA	NA	nov_2020	Soil	bulk_soil	NA	1	168870	NA	ITS1-1F†	X201SC20123127-Z01-F001	k__Fungi	p__Ascomycota	c__Leotiomycetes	o__Helotiales	f__Helotiales_fam_Incertae_sedis	Leptodontidium
569	SV57	Ti_Rhiz_2	0.0121623	Ti_Rhiz_2	FKDN202654740-1A	NA	NA	nov_2020	Tipple	rhizosphere	NA	2	145607	NA	ITS1-1F†	X201SC20123127-Z01-F001	k__Fungi	p__Mortierellomycota	c__Mortierellomycetes	o__Mortierellales	f__Mortierellaceae	Mortierella
497	SV50	Ti_Roots_1	0.0121106	Ti_Roots_1	FKDN202654744-1A	NA	NA	nov_2020	Tipple	roots	NA	1	138221	NA	ITS1-1F†	X201SC20123127-Z01-F001	k__Fungi	p__Ascomycota	c__Sordariomycetes	o__Myrmecridiales	f__Myrmecridiales_fam_Incertae_sedis	Goidanichiella
296	SV26	Soil_3	0.0119297	Soil_3	FKDN202654736-1A	NA	NA	nov_2020	Soil	bulk_soil	NA	3	158868	NA	ITS1-1F†	X201SC20123127-Z01-F001	k__Fungi	p__Ascomycota	c__Leotiomycetes	o__Helotiales	f__Helotiaceae	Meliniomyces
724	SV9	Ti_Rhiz_5	0.0118298	Ti_Rhiz_5	FKDN202654742-1A	NA	NA	nov_2020	Tipple	rhizosphere	NA	4	137928	NA	ITS1-1F†	X201SC20123127-Z01-F001	k__Fungi	p__Ascomycota	c__Sordariomycetes	o__Hypocreales	f__Hypocreaceae	Trichoderma
555	SV57	Ti_Rhiz_1	0.0117643	Ti_Rhiz_1	FKDN202654739-1A	NA	NA	nov_2020	Tipple	rhizosphere	NA	1	140148	NA	ITS1-1F†	X201SC20123127-Z01-F001	k__Fungi	p__Mortierellomycota	c__Mortierellomycetes	o__Mortierellales	f__Mortierellaceae	Mortierella
142	SV13	Soil_4	0.0117182	Soil_4	FKDN202654737-1A	NA	NA	nov_2020	Soil	bulk_soil	NA	4	134188	NA	ITS1-1F†	X201SC20123127-Z01-F001	k__Fungi	p__Ascomycota	c__Sordariomycetes	o__Conioscyphales	f__Conioscyphaceae	Conioscypha
499	SV50	Ti_Roots_5	0.01155	Ti_Roots_5	FKDN202654747-1A	NA	NA	nov_2020	Tipple	roots	NA	4	147810	NA	ITS1-1F†	X201SC20123127-Z01-F001	k__Fungi	p__Ascomycota	c__Sordariomycetes	o__Myrmecridiales	f__Myrmecridiales_fam_Incertae_sedis	Goidanichiella
276	SV26	Che_Roots_4	0.0115039	Che_Roots_4	FKDN202654756-1A	NA	NA	nov_2020	Chevallier	roots	NA	3	168529	NA	ITS1-1F†	X201SC20123127-Z01-F001	k__Fungi	p__Ascomycota	c__Leotiomycetes	o__Helotiales	f__Helotiaceae	Meliniomyces
387	SV43	Soil_1	0.0112221	Soil_1	FKDN202654734-1A	NA	NA	nov_2020	Soil	bulk_soil	NA	1	168870	NA	ITS1-1F†	X201SC20123127-Z01-F001	k__Fungi	p__Ascomycota	c__Sordariomycetes	o__Hypocreales	f__Hypocreales_fam_Incertae_sedis	Acremonium
314	SV27	Che_Roots_4	0.0109762	Che_Roots_4	FKDN202654756-1A	NA	NA	nov_2020	Chevallier	roots	NA	3	168529	NA	ITS1-1F†	X201SC20123127-Z01-F001	k__Fungi	p__Ascomycota	c__Leotiomycetes	o__Helotiales	f__Helotiales_fam_Incertae_sedis	Leptodontidium
485	SV50	Soil_4	0.0109234	Soil_4	FKDN202654737-1A	NA	NA	nov_2020	Soil	bulk_soil	NA	4	134188	NA	ITS1-1F†	X201SC20123127-Z01-F001	k__Fungi	p__Ascomycota	c__Sordariomycetes	o__Myrmecridiales	f__Myrmecridiales_fam_Incertae_sedis	Goidanichiella
321	SV27	Ti_Rhiz_6	0.0105515	Ti_Rhiz_6	FKDN202654743-1A	NA	NA	nov_2020	Tipple	rhizosphere	NA	5	163472	NA	ITS1-1F†	X201SC20123127-Z01-F001	k__Fungi	p__Ascomycota	c__Leotiomycetes	o__Helotiales	f__Helotiales_fam_Incertae_sedis	Leptodontidium
155	SV15	Che_Rhiz_5	0.0104224	Che_Rhiz_5	FKDN202654752-1A	NA	NA	nov_2020	Chevallier	rhizosphere	NA	4	142946	NA	ITS1-1F†	X201SC20123127-Z01-F001	k__Fungi	p__Basidiomycota	c__Agaricomycetes	o__Auriculariales	f__Exidiaceae	Basidiodendron
495	SV50	Soil_2	0.0104218	Soil_2	FKDN202654735-1A	NA	NA	nov_2020	Soil	bulk_soil	NA	2	139968	NA	ITS1-1F†	X201SC20123127-Z01-F001	k__Fungi	p__Ascomycota	c__Sordariomycetes	o__Myrmecridiales	f__Myrmecridiales_fam_Incertae_sedis	Goidanichiella
426	SV49	Che_Rhiz_5	0.010273	Che_Rhiz_5	FKDN202654752-1A	NA	NA	nov_2020	Chevallier	rhizosphere	NA	4	142946	NA	ITS1-1F†	X201SC20123127-Z01-F001	k__Fungi	p__Basidiomycota	c__Tremellomycetes	o__Filobasidiales	f__Piskurozymaceae	Solicoccozyma
390	SV43	Soil_2	0.0102145	Soil_2	FKDN202654735-1A	NA	NA	nov_2020	Soil	bulk_soil	NA	2	139968	NA	ITS1-1F†	X201SC20123127-Z01-F001	k__Fungi	p__Ascomycota	c__Sordariomycetes	o__Hypocreales	f__Hypocreales_fam_Incertae_sedis	Acremonium
379	SV43	Che_Rhiz_5	0.0101939	Che_Rhiz_5	FKDN202654752-1A	NA	NA	nov_2020	Chevallier	rhizosphere	NA	4	142946	NA	ITS1-1F†	X201SC20123127-Z01-F001	k__Fungi	p__Ascomycota	c__Sordariomycetes	o__Hypocreales	f__Hypocreales_fam_Incertae_sedis	Acremonium
479	SV50	Che_Rhiz_5	0.0101588	Che_Rhiz_5	FKDN202654752-1A	NA	NA	nov_2020	Chevallier	rhizosphere	NA	4	142946	NA	ITS1-1F†	X201SC20123127-Z01-F001	k__Fungi	p__Ascomycota	c__Sordariomycetes	o__Myrmecridiales	f__Myrmecridiales_fam_Incertae_sedis	Goidanichiella
436	SV49	Soil_3	0.0100832	Soil_3	FKDN202654736-1A	NA	NA	nov_2020	Soil	bulk_soil	NA	3	158868	NA	ITS1-1F†	X201SC20123127-Z01-F001	k__Fungi	p__Basidiomycota	c__Tremellomycetes	o__Filobasidiales	f__Piskurozymaceae	Solicoccozyma
441	SV49	Soil_2	0.00990351	Soil_2	FKDN202654735-1A	NA	NA	nov_2020	Soil	bulk_soil	NA	2	139968	NA	ITS1-1F†	X201SC20123127-Z01-F001	k__Fungi	p__Basidiomycota	c__Tremellomycetes	o__Filobasidiales	f__Piskurozymaceae	Solicoccozyma
465	SV5	Ti_Roots_4	0.00972034	Ti_Roots_4	FKDN202654746-1A	NA	NA	nov_2020	Tipple	roots	NA	3	151349	NA	ITS1-1F†	X201SC20123127-Z01-F001	k__Fungi	p__Ascomycota	c__Sordariomycetes	o__Sordariales	f__Lasiosphaeriaceae	Fimetariella
133	SV13	Che_Rhiz_4	0.00956865	Che_Rhiz_4	FKDN202654751-1A	NA	NA	nov_2020	Chevallier	rhizosphere	NA	3	143428	NA	ITS1-1F†	X201SC20123127-Z01-F001	k__Fungi	p__Ascomycota	c__Sordariomycetes	o__Conioscyphales	f__Conioscyphaceae	Conioscypha
442	SV49	Soil_1	0.00947386	Soil_1	FKDN202654734-1A	NA	NA	nov_2020	Soil	bulk_soil	NA	1	168870	NA	ITS1-1F†	X201SC20123127-Z01-F001	k__Fungi	p__Basidiomycota	c__Tremellomycetes	o__Filobasidiales	f__Piskurozymaceae	Solicoccozyma
446	SV49	Ti_Rhiz_4	0.00936151	Ti_Rhiz_4	FKDN202654741-1A	NA	NA	nov_2020	Tipple	rhizosphere	NA	3	155460	NA	ITS1-1F†	X201SC20123127-Z01-F001	k__Fungi	p__Basidiomycota	c__Tremellomycetes	o__Filobasidiales	f__Piskurozymaceae	Solicoccozyma
491	SV50	Ti_Rhiz_4	0.00927342	Ti_Rhiz_4	FKDN202654741-1A	NA	NA	nov_2020	Tipple	rhizosphere	NA	3	155460	NA	ITS1-1F†	X201SC20123127-Z01-F001	k__Fungi	p__Ascomycota	c__Sordariomycetes	o__Myrmecridiales	f__Myrmecridiales_fam_Incertae_sedis	Goidanichiella
573	SV57	Ti_Rhiz_4	0.00906521	Ti_Rhiz_4	FKDN202654741-1A	NA	NA	nov_2020	Tipple	rhizosphere	NA	3	155460	NA	ITS1-1F†	X201SC20123127-Z01-F001	k__Fungi	p__Mortierellomycota	c__Mortierellomycetes	o__Mortierellales	f__Mortierellaceae	Mortierella
545	SV54	Soil_3	0.00901959	Soil_3	FKDN202654736-1A	NA	NA	nov_2020	Soil	bulk_soil	NA	3	158868	NA	ITS1-1F†	X201SC20123127-Z01-F001	k__Fungi	p__Ascomycota	c__Archaeorhizomycetes	o__Archaeorhizomycetales	f__Archaeorhizomycetaceae	Archaeorhizomyces
162	SV15	Ti_Rhiz_2	0.00900909	Ti_Rhiz_2	FKDN202654740-1A	NA	NA	nov_2020	Tipple	rhizosphere	NA	2	145607	NA	ITS1-1F†	X201SC20123127-Z01-F001	k__Fungi	p__Basidiomycota	c__Agaricomycetes	o__Auriculariales	f__Exidiaceae	Basidiodendron
528	SV54	Che_Rhiz_3	0.0089639	Che_Rhiz_3	FKDN202654750-1A	NA	NA	nov_2020	Chevallier	rhizosphere	NA	2	148574	NA	ITS1-1F†	X201SC20123127-Z01-F001	k__Fungi	p__Ascomycota	c__Archaeorhizomycetes	o__Archaeorhizomycetales	f__Archaeorhizomycetaceae	Archaeorhizomyces
585	SV59	Che_Rhiz_5	0.00886698	Che_Rhiz_5	FKDN202654752-1A	NA	NA	nov_2020	Chevallier	rhizosphere	NA	4	142946	NA	ITS1-1F†	X201SC20123127-Z01-F001	k__Fungi	p__Ascomycota	c__Saccharomycetes	o__Saccharomycetales	f__Trichomonascaceae	Blastobotrys
601	SV64	Che_Rhiz_5	0.00878789	Che_Rhiz_5	FKDN202654752-1A	NA	NA	nov_2020	Chevallier	rhizosphere	NA	4	142946	NA	ITS1-1F†	X201SC20123127-Z01-F001	k__Fungi	p__Ascomycota	c__Sordariomycetes	o__Sordariales	f__Cephalothecaceae	Phialemonium
328	SV4	Che_Roots_4	0.00800698	Che_Roots_4	FKDN202654756-1A	NA	NA	nov_2020	Chevallier	roots	NA	3	168529	NA	ITS1-1F†	X201SC20123127-Z01-F001	k__Fungi	p__Ascomycota	c__Saccharomycetes	o__Saccharomycetales	f__Saccharomycetales_fam_Incertae_sedis	Candida
533	SV54	Che_Rhiz_2	0.00796443	Che_Rhiz_2	FKDN202654749-1A	NA	NA	nov_2020	Chevallier	rhizosphere	NA	1	157371	NA	ITS1-1F†	X201SC20123127-Z01-F001	k__Fungi	p__Ascomycota	c__Archaeorhizomycetes	o__Archaeorhizomycetales	f__Archaeorhizomycetaceae	Archaeorhizomyces
660	SV73	Che_Roots_4	0.00786626	Che_Roots_4	FKDN202654756-1A	NA	NA	nov_2020	Chevallier	roots	NA	3	168529	NA	ITS1-1F†	X201SC20123127-Z01-F001	k__Fungi	p__Basidiomycota	c__Agaricomycetes	o__Agaricales	f__Strophariaceae	Galerina
309	SV27	Soil_4	0.00786226	Soil_4	FKDN202654737-1A	NA	NA	nov_2020	Soil	bulk_soil	NA	4	134188	NA	ITS1-1F†	X201SC20123127-Z01-F001	k__Fungi	p__Ascomycota	c__Leotiomycetes	o__Helotiales	f__Helotiales_fam_Incertae_sedis	Leptodontidium
392	SV43	Ti_Rhiz_6	0.00781114	Ti_Rhiz_6	FKDN202654743-1A	NA	NA	nov_2020	Tipple	rhizosphere	NA	5	163472	NA	ITS1-1F†	X201SC20123127-Z01-F001	k__Fungi	p__Ascomycota	c__Sordariomycetes	o__Hypocreales	f__Hypocreales_fam_Incertae_sedis	Acremonium
149	SV13	Ti_Rhiz_6	0.00773523	Ti_Rhiz_6	FKDN202654743-1A	NA	NA	nov_2020	Tipple	rhizosphere	NA	5	163472	NA	ITS1-1F†	X201SC20123127-Z01-F001	k__Fungi	p__Ascomycota	c__Sordariomycetes	o__Conioscyphales	f__Conioscyphaceae	Conioscypha
281	SV26	Ti_Rhiz_5	0.00764744	Ti_Rhiz_5	FKDN202654742-1A	NA	NA	nov_2020	Tipple	rhizosphere	NA	4	137928	NA	ITS1-1F†	X201SC20123127-Z01-F001	k__Fungi	p__Ascomycota	c__Leotiomycetes	o__Helotiales	f__Helotiaceae	Meliniomyces
494	SV50	Che_Roots_5	0.00755678	Che_Roots_5	FKDN202654757-1A	NA	NA	nov_2020	Chevallier	roots	NA	4	153857	NA	ITS1-1F†	X201SC20123127-Z01-F001	k__Fungi	p__Ascomycota	c__Sordariomycetes	o__Myrmecridiales	f__Myrmecridiales_fam_Incertae_sedis	Goidanichiella
130	SV13	Soil_1	0.00735098	Soil_1	FKDN202654734-1A	NA	NA	nov_2020	Soil	bulk_soil	NA	1	168870	NA	ITS1-1F†	X201SC20123127-Z01-F001	k__Fungi	p__Ascomycota	c__Sordariomycetes	o__Conioscyphales	f__Conioscyphaceae	Conioscypha
169	SV15	Che_Roots_6	0.00732579	Che_Roots_6	FKDN202654758-1A	NA	NA	nov_2020	Chevallier	roots	NA	5	159052	NA	ITS1-1F†	X201SC20123127-Z01-F001	k__Fungi	p__Basidiomycota	c__Agaricomycetes	o__Auriculariales	f__Exidiaceae	Basidiodendron
128	SV13	Soil_3	0.00730076	Soil_3	FKDN202654736-1A	NA	NA	nov_2020	Soil	bulk_soil	NA	3	158868	NA	ITS1-1F†	X201SC20123127-Z01-F001	k__Fungi	p__Ascomycota	c__Sordariomycetes	o__Conioscyphales	f__Conioscyphaceae	Conioscypha
160	SV15	Ti_Rhiz_5	0.00725859	Ti_Rhiz_5	FKDN202654742-1A	NA	NA	nov_2020	Tipple	rhizosphere	NA	4	137928	NA	ITS1-1F†	X201SC20123127-Z01-F001	k__Fungi	p__Basidiomycota	c__Agaricomycetes	o__Auriculariales	f__Exidiaceae	Basidiodendron
492	SV50	Soil_1	0.00722611	Soil_1	FKDN202654734-1A	NA	NA	nov_2020	Soil	bulk_soil	NA	1	168870	NA	ITS1-1F†	X201SC20123127-Z01-F001	k__Fungi	p__Ascomycota	c__Sordariomycetes	o__Myrmecridiales	f__Myrmecridiales_fam_Incertae_sedis	Goidanichiella
185	SV154	Che_Roots_5	0.00675828	Che_Roots_5	FKDN202654757-1A	NA	NA	nov_2020	Chevallier	roots	NA	4	153857	NA	ITS1-1F†	X201SC20123127-Z01-F001	k__Fungi	p__Ascomycota	c__Sordariomycetes	o__Hypocreales	f__Nectriaceae	Fusarium
263	SV20	Soil_4	0.00673448	Soil_4	FKDN202654737-1A	NA	NA	nov_2020	Soil	bulk_soil	NA	4	134188	NA	ITS1-1F†	X201SC20123127-Z01-F001	k__Fungi	p__Ascomycota	c__Leotiomycetes	o__Helotiales	f__Myxotrichaceae	Oidiodendron
553	SV57	Che_Rhiz_5	0.00668758	Che_Rhiz_5	FKDN202654752-1A	NA	NA	nov_2020	Chevallier	rhizosphere	NA	4	142946	NA	ITS1-1F†	X201SC20123127-Z01-F001	k__Fungi	p__Mortierellomycota	c__Mortierellomycetes	o__Mortierellales	f__Mortierellaceae	Mortierella
459	SV5	Ti_Roots_5	0.00665132	Ti_Roots_5	FKDN202654747-1A	NA	NA	nov_2020	Tipple	roots	NA	4	147810	NA	ITS1-1F†	X201SC20123127-Z01-F001	k__Fungi	p__Ascomycota	c__Sordariomycetes	o__Sordariales	f__Lasiosphaeriaceae	Fimetariella
712	SV9	Soil_4	0.00658411	Soil_4	FKDN202654737-1A	NA	NA	nov_2020	Soil	bulk_soil	NA	4	134188	NA	ITS1-1F†	X201SC20123127-Z01-F001	k__Fungi	p__Ascomycota	c__Sordariomycetes	o__Hypocreales	f__Hypocreaceae	Trichoderma
323	SV27	Ti_Rhiz_5	0.00645496	Ti_Rhiz_5	FKDN202654742-1A	NA	NA	nov_2020	Tipple	rhizosphere	NA	4	137928	NA	ITS1-1F†	X201SC20123127-Z01-F001	k__Fungi	p__Ascomycota	c__Leotiomycetes	o__Helotiales	f__Helotiales_fam_Incertae_sedis	Leptodontidium
433	SV49	Ti_Rhiz_1	0.00637081	Ti_Rhiz_1	FKDN202654739-1A	NA	NA	nov_2020	Tipple	rhizosphere	NA	1	140148	NA	ITS1-1F†	X201SC20123127-Z01-F001	k__Fungi	p__Basidiomycota	c__Tremellomycetes	o__Filobasidiales	f__Piskurozymaceae	Solicoccozyma
261	SV20	Soil_5	0.00636969	Soil_5	FKDN202654738-1A	NA	NA	nov_2020	Soil	bulk_soil	NA	5	160871	NA	ITS1-1F†	X201SC20123127-Z01-F001	k__Fungi	p__Ascomycota	c__Leotiomycetes	o__Helotiales	f__Myxotrichaceae	Oidiodendron
127	SV13	Che_Roots_6	0.00636836	Che_Roots_6	FKDN202654758-1A	NA	NA	nov_2020	Chevallier	roots	NA	5	159052	NA	ITS1-1F†	X201SC20123127-Z01-F001	k__Fungi	p__Ascomycota	c__Sordariomycetes	o__Conioscyphales	f__Conioscyphaceae	Conioscypha
394	SV43	Ti_Rhiz_5	0.0063599	Ti_Rhiz_5	FKDN202654742-1A	NA	NA	nov_2020	Tipple	rhizosphere	NA	4	137928	NA	ITS1-1F†	X201SC20123127-Z01-F001	k__Fungi	p__Ascomycota	c__Sordariomycetes	o__Hypocreales	f__Hypocreales_fam_Incertae_sedis	Acremonium
434	SV49	Soil_5	0.006353	Soil_5	FKDN202654738-1A	NA	NA	nov_2020	Soil	bulk_soil	NA	5	160871	NA	ITS1-1F†	X201SC20123127-Z01-F001	k__Fungi	p__Basidiomycota	c__Tremellomycetes	o__Filobasidiales	f__Piskurozymaceae	Solicoccozyma
336	SV4	Ti_Roots_4	0.0061842	Ti_Roots_4	FKDN202654746-1A	NA	NA	nov_2020	Tipple	roots	NA	3	151349	NA	ITS1-1F†	X201SC20123127-Z01-F001	k__Fungi	p__Ascomycota	c__Saccharomycetes	o__Saccharomycetales	f__Saccharomycetales_fam_Incertae_sedis	Candida
329	SV4	Che_Roots_3	0.00601593	Che_Roots_3	FKDN202654755-1A	NA	NA	nov_2020	Chevallier	roots	NA	2	153822	NA	ITS1-1F†	X201SC20123127-Z01-F001	k__Fungi	p__Ascomycota	c__Saccharomycetes	o__Saccharomycetales	f__Saccharomycetales_fam_Incertae_sedis	Candida
69	SV12	Che_Roots_5	0.00587266	Che_Roots_5	FKDN202654757-1A	NA	NA	nov_2020	Chevallier	roots	NA	4	153857	NA	ITS1-1F†	X201SC20123127-Z01-F001	k__Fungi	p__Ascomycota	c__Eurotiomycetes	o__Eurotiales	f__Aspergillaceae	Penicillium
473	SV5	Ti_Roots_1	0.00581906	Ti_Roots_1	FKDN202654744-1A	NA	NA	nov_2020	Tipple	roots	NA	1	138221	NA	ITS1-1F†	X201SC20123127-Z01-F001	k__Fungi	p__Ascomycota	c__Sordariomycetes	o__Sordariales	f__Lasiosphaeriaceae	Fimetariella
574	SV57	Ti_Roots_1	0.00565328	Ti_Roots_1	FKDN202654744-1A	NA	NA	nov_2020	Tipple	roots	NA	1	138221	NA	ITS1-1F†	X201SC20123127-Z01-F001	k__Fungi	p__Mortierellomycota	c__Mortierellomycetes	o__Mortierellales	f__Mortierellaceae	Mortierella
307	SV27	Soil_5	0.00561835	Soil_5	FKDN202654738-1A	NA	NA	nov_2020	Soil	bulk_soil	NA	5	160871	NA	ITS1-1F†	X201SC20123127-Z01-F001	k__Fungi	p__Ascomycota	c__Leotiomycetes	o__Helotiales	f__Helotiales_fam_Incertae_sedis	Leptodontidium
431	SV49	Soil_4	0.00556373	Soil_4	FKDN202654737-1A	NA	NA	nov_2020	Soil	bulk_soil	NA	4	134188	NA	ITS1-1F†	X201SC20123127-Z01-F001	k__Fungi	p__Basidiomycota	c__Tremellomycetes	o__Filobasidiales	f__Piskurozymaceae	Solicoccozyma
29	SV100	Che_Roots_4	0.00555845	Che_Roots_4	FKDN202654756-1A	NA	NA	nov_2020	Chevallier	roots	NA	3	168529	NA	ITS1-1F†	X201SC20123127-Z01-F001	k__Fungi	p__Basidiomycota	c__Microbotryomycetes	o__Microbotryales	f__Ustilentylomataceae	Bauerago
741	SV93	Soil_2	0.00548415	Soil_2	FKDN202654735-1A	NA	NA	nov_2020	Soil	bulk_soil	NA	2	139968	NA	ITS1-1F†	X201SC20123127-Z01-F001	k__Fungi	p__Basidiomycota	c__Agaricomycetes	o__Cantharellales	f__Cantharellales_fam_Incertae_sedis	Sistotrema
483	SV50	Ti_Rhiz_6	0.0052302	Ti_Rhiz_6	FKDN202654743-1A	NA	NA	nov_2020	Tipple	rhizosphere	NA	5	163472	NA	ITS1-1F†	X201SC20123127-Z01-F001	k__Fungi	p__Ascomycota	c__Sordariomycetes	o__Myrmecridiales	f__Myrmecridiales_fam_Incertae_sedis	Goidanichiella
301	SV27	Che_Rhiz_5	0.00522879	Che_Rhiz_5	FKDN202654752-1A	NA	NA	nov_2020	Chevallier	rhizosphere	NA	4	142946	NA	ITS1-1F†	X201SC20123127-Z01-F001	k__Fungi	p__Ascomycota	c__Leotiomycetes	o__Helotiales	f__Helotiales_fam_Incertae_sedis	Leptodontidium
146	SV13	Che_Roots_4	0.00509407	Che_Roots_4	FKDN202654756-1A	NA	NA	nov_2020	Chevallier	roots	NA	3	168529	NA	ITS1-1F†	X201SC20123127-Z01-F001	k__Fungi	p__Ascomycota	c__Sordariomycetes	o__Conioscyphales	f__Conioscyphaceae	Conioscypha
322	SV27	Ti_Roots_1	0.0049404	Ti_Roots_1	FKDN202654744-1A	NA	NA	nov_2020	Tipple	roots	NA	1	138221	NA	ITS1-1F†	X201SC20123127-Z01-F001	k__Fungi	p__Ascomycota	c__Leotiomycetes	o__Helotiales	f__Helotiales_fam_Incertae_sedis	Leptodontidium
539	SV54	Soil_5	0.00477518	Soil_5	FKDN202654738-1A	NA	NA	nov_2020	Soil	bulk_soil	NA	5	160871	NA	ITS1-1F†	X201SC20123127-Z01-F001	k__Fungi	p__Ascomycota	c__Archaeorhizomycetes	o__Archaeorhizomycetales	f__Archaeorhizomycetaceae	Archaeorhizomyces
716	SV9	Che_Roots_4	0.00477041	Che_Roots_4	FKDN202654756-1A	NA	NA	nov_2020	Chevallier	roots	NA	3	168529	NA	ITS1-1F†	X201SC20123127-Z01-F001	k__Fungi	p__Ascomycota	c__Sordariomycetes	o__Hypocreales	f__Hypocreaceae	Trichoderma
487	SV50	Ti_Rhiz_1	0.00461522	Ti_Rhiz_1	FKDN202654739-1A	NA	NA	nov_2020	Tipple	rhizosphere	NA	1	140148	NA	ITS1-1F†	X201SC20123127-Z01-F001	k__Fungi	p__Ascomycota	c__Sordariomycetes	o__Myrmecridiales	f__Myrmecridiales_fam_Incertae_sedis	Goidanichiella
523	SV51	Ti_Rhiz_2	0.00439193	Ti_Rhiz_2	FKDN202654740-1A	NA	NA	nov_2020	Tipple	rhizosphere	NA	2	145607	NA	ITS1-1F†	X201SC20123127-Z01-F001	k__Fungi	p__Ascomycota	c__Eurotiomycetes	o__Eurotiales	f__Trichocomaceae	Rasamsonia
438	SV49	Ti_Rhiz_6	0.0043876	Ti_Rhiz_6	FKDN202654743-1A	NA	NA	nov_2020	Tipple	rhizosphere	NA	5	163472	NA	ITS1-1F†	X201SC20123127-Z01-F001	k__Fungi	p__Basidiomycota	c__Tremellomycetes	o__Filobasidiales	f__Piskurozymaceae	Solicoccozyma
432	SV49	Ti_Rhiz_2	0.00436378	Ti_Rhiz_2	FKDN202654740-1A	NA	NA	nov_2020	Tipple	rhizosphere	NA	2	145607	NA	ITS1-1F†	X201SC20123127-Z01-F001	k__Fungi	p__Basidiomycota	c__Tremellomycetes	o__Filobasidiales	f__Piskurozymaceae	Solicoccozyma
514	SV51	Che_Rhiz_3	0.00424991	Che_Rhiz_3	FKDN202654750-1A	NA	NA	nov_2020	Chevallier	rhizosphere	NA	2	148574	NA	ITS1-1F†	X201SC20123127-Z01-F001	k__Fungi	p__Ascomycota	c__Eurotiomycetes	o__Eurotiales	f__Trichocomaceae	Rasamsonia
493	SV50	Che_Roots_6	0.00414887	Che_Roots_6	FKDN202654758-1A	NA	NA	nov_2020	Chevallier	roots	NA	5	159052	NA	ITS1-1F†	X201SC20123127-Z01-F001	k__Fungi	p__Ascomycota	c__Sordariomycetes	o__Myrmecridiales	f__Myrmecridiales_fam_Incertae_sedis	Goidanichiella
588	SV59	Ti_Rhiz_2	0.00413855	Ti_Rhiz_2	FKDN202654740-1A	NA	NA	nov_2020	Tipple	rhizosphere	NA	2	145607	NA	ITS1-1F†	X201SC20123127-Z01-F001	k__Fungi	p__Ascomycota	c__Saccharomycetes	o__Saccharomycetales	f__Trichomonascaceae	Blastobotrys
326	SV4	Che_Roots_2	0.00388088	Che_Roots_2	FKDN202654754-1A	NA	NA	nov_2020	Chevallier	roots	NA	1	169149	NA	ITS1-1F†	X201SC20123127-Z01-F001	k__Fungi	p__Ascomycota	c__Saccharomycetes	o__Saccharomycetales	f__Saccharomycetales_fam_Incertae_sedis	Candida
490	SV50	Soil_3	0.00388012	Soil_3	FKDN202654736-1A	NA	NA	nov_2020	Soil	bulk_soil	NA	3	158868	NA	ITS1-1F†	X201SC20123127-Z01-F001	k__Fungi	p__Ascomycota	c__Sordariomycetes	o__Myrmecridiales	f__Myrmecridiales_fam_Incertae_sedis	Goidanichiella
581	SV59	Ti_Rhiz_5	0.00387989	Ti_Rhiz_5	FKDN202654742-1A	NA	NA	nov_2020	Tipple	rhizosphere	NA	4	137928	NA	ITS1-1F†	X201SC20123127-Z01-F001	k__Fungi	p__Ascomycota	c__Saccharomycetes	o__Saccharomycetales	f__Trichomonascaceae	Blastobotrys
381	SV43	Soil_3	0.00383758	Soil_3	FKDN202654736-1A	NA	NA	nov_2020	Soil	bulk_soil	NA	3	158868	NA	ITS1-1F†	X201SC20123127-Z01-F001	k__Fungi	p__Ascomycota	c__Sordariomycetes	o__Hypocreales	f__Hypocreales_fam_Incertae_sedis	Acremonium
342	SV4	Ti_Roots_2	0.00364521	Ti_Roots_2	FKDN202654745-1A	NA	NA	nov_2020	Tipple	roots	NA	2	166122	NA	ITS1-1F†	X201SC20123127-Z01-F001	k__Fungi	p__Ascomycota	c__Saccharomycetes	o__Saccharomycetales	f__Saccharomycetales_fam_Incertae_sedis	Candida
575	SV57	Ti_Rhiz_5	0.00362065	Ti_Rhiz_5	FKDN202654742-1A	NA	NA	nov_2020	Tipple	rhizosphere	NA	4	137928	NA	ITS1-1F†	X201SC20123127-Z01-F001	k__Fungi	p__Mortierellomycota	c__Mortierellomycetes	o__Mortierellales	f__Mortierellaceae	Mortierella
557	SV57	Che_Roots_6	0.00361938	Che_Roots_6	FKDN202654758-1A	NA	NA	nov_2020	Chevallier	roots	NA	5	159052	NA	ITS1-1F†	X201SC20123127-Z01-F001	k__Fungi	p__Mortierellomycota	c__Mortierellomycetes	o__Mortierellales	f__Mortierellaceae	Mortierella
593	SV59	Ti_Rhiz_1	0.00361073	Ti_Rhiz_1	FKDN202654739-1A	NA	NA	nov_2020	Tipple	rhizosphere	NA	1	140148	NA	ITS1-1F†	X201SC20123127-Z01-F001	k__Fungi	p__Ascomycota	c__Saccharomycetes	o__Saccharomycetales	f__Trichomonascaceae	Blastobotrys
515	SV51	Soil_5	0.00358974	Soil_5	FKDN202654738-1A	NA	NA	nov_2020	Soil	bulk_soil	NA	5	160871	NA	ITS1-1F†	X201SC20123127-Z01-F001	k__Fungi	p__Ascomycota	c__Eurotiomycetes	o__Eurotiales	f__Trichocomaceae	Rasamsonia
384	SV43	Soil_4	0.00354446	Soil_4	FKDN202654737-1A	NA	NA	nov_2020	Soil	bulk_soil	NA	4	134188	NA	ITS1-1F†	X201SC20123127-Z01-F001	k__Fungi	p__Ascomycota	c__Sordariomycetes	o__Hypocreales	f__Hypocreales_fam_Incertae_sedis	Acremonium
577	SV59	Ti_Rhiz_6	0.00349945	Ti_Rhiz_6	FKDN202654743-1A	NA	NA	nov_2020	Tipple	rhizosphere	NA	5	163472	NA	ITS1-1F†	X201SC20123127-Z01-F001	k__Fungi	p__Ascomycota	c__Saccharomycetes	o__Saccharomycetales	f__Trichomonascaceae	Blastobotrys
684	SV83	Soil_2	0.00346764	Soil_2	FKDN202654735-1A	NA	NA	nov_2020	Soil	bulk_soil	NA	2	139968	NA	ITS1-1F†	X201SC20123127-Z01-F001	k__Fungi	p__Basidiomycota	c__Tremellomycetes	o__Trichosporonales	f__Trichosporonaceae	Cutaneotrichosporon
517	SV51	Soil_4	0.00342631	Soil_4	FKDN202654737-1A	NA	NA	nov_2020	Soil	bulk_soil	NA	4	134188	NA	ITS1-1F†	X201SC20123127-Z01-F001	k__Fungi	p__Ascomycota	c__Eurotiomycetes	o__Eurotiales	f__Trichocomaceae	Rasamsonia
274	SV20	Ti_Roots_1	0.00342347	Ti_Roots_1	FKDN202654744-1A	NA	NA	nov_2020	Tipple	roots	NA	1	138221	NA	ITS1-1F†	X201SC20123127-Z01-F001	k__Fungi	p__Ascomycota	c__Leotiomycetes	o__Helotiales	f__Myxotrichaceae	Oidiodendron
525	SV51	Ti_Rhiz_4	0.00337943	Ti_Rhiz_4	FKDN202654741-1A	NA	NA	nov_2020	Tipple	rhizosphere	NA	3	155460	NA	ITS1-1F†	X201SC20123127-Z01-F001	k__Fungi	p__Ascomycota	c__Eurotiomycetes	o__Eurotiales	f__Trichocomaceae	Rasamsonia
536	SV54	Soil_4	0.00335113	Soil_4	FKDN202654737-1A	NA	NA	nov_2020	Soil	bulk_soil	NA	4	134188	NA	ITS1-1F†	X201SC20123127-Z01-F001	k__Fungi	p__Ascomycota	c__Archaeorhizomycetes	o__Archaeorhizomycetales	f__Archaeorhizomycetaceae	Archaeorhizomyces
96	SV120	Ti_Roots_4	0.00334238	Ti_Roots_4	FKDN202654746-1A	NA	NA	nov_2020	Tipple	roots	NA	3	151349	NA	ITS1-1F†	X201SC20123127-Z01-F001	k__Fungi	p__Ascomycota	c__Sordariomycetes	o__Hypocreales	f__Nectriaceae	Ilyonectria
546	SV54	Soil_1	0.00332168	Soil_1	FKDN202654734-1A	NA	NA	nov_2020	Soil	bulk_soil	NA	1	168870	NA	ITS1-1F†	X201SC20123127-Z01-F001	k__Fungi	p__Ascomycota	c__Archaeorhizomycetes	o__Archaeorhizomycetales	f__Archaeorhizomycetaceae	Archaeorhizomyces
440	SV49	Ti_Rhiz_5	0.00330093	Ti_Rhiz_5	FKDN202654742-1A	NA	NA	nov_2020	Tipple	rhizosphere	NA	4	137928	NA	ITS1-1F†	X201SC20123127-Z01-F001	k__Fungi	p__Basidiomycota	c__Tremellomycetes	o__Filobasidiales	f__Piskurozymaceae	Solicoccozyma
456	SV5	Che_Roots_3	0.00328141	Che_Roots_3	FKDN202654755-1A	NA	NA	nov_2020	Chevallier	roots	NA	2	153822	NA	ITS1-1F†	X201SC20123127-Z01-F001	k__Fungi	p__Ascomycota	c__Sordariomycetes	o__Sordariales	f__Lasiosphaeriaceae	Fimetariella
141	SV13	Che_Rhiz_6	0.00327606	Che_Rhiz_6	FKDN202654753-1A	NA	NA	nov_2020	Chevallier	rhizosphere	NA	5	152328	NA	ITS1-1F†	X201SC20123127-Z01-F001	k__Fungi	p__Ascomycota	c__Sordariomycetes	o__Conioscyphales	f__Conioscyphaceae	Conioscypha
696	SV83	Soil_5	0.00324746	Soil_5	FKDN202654738-1A	NA	NA	nov_2020	Soil	bulk_soil	NA	5	160871	NA	ITS1-1F†	X201SC20123127-Z01-F001	k__Fungi	p__Basidiomycota	c__Tremellomycetes	o__Trichosporonales	f__Trichosporonaceae	Cutaneotrichosporon
511	SV51	Ti_Roots_6	0.00322873	Ti_Roots_6	FKDN202654748-1A	NA	NA	nov_2020	Tipple	roots	NA	5	132836	NA	ITS1-1F†	X201SC20123127-Z01-F001	k__Fungi	p__Ascomycota	c__Eurotiomycetes	o__Eurotiales	f__Trichocomaceae	Rasamsonia
677	SV83	Che_Roots_2	0.00317409	Che_Roots_2	FKDN202654754-1A	NA	NA	nov_2020	Chevallier	roots	NA	1	169149	NA	ITS1-1F†	X201SC20123127-Z01-F001	k__Fungi	p__Basidiomycota	c__Tremellomycetes	o__Trichosporonales	f__Trichosporonaceae	Cutaneotrichosporon
337	SV4	Che_Rhiz_4	0.00315417	Che_Rhiz_4	FKDN202654751-1A	NA	NA	nov_2020	Chevallier	rhizosphere	NA	3	143428	NA	ITS1-1F†	X201SC20123127-Z01-F001	k__Fungi	p__Ascomycota	c__Saccharomycetes	o__Saccharomycetales	f__Saccharomycetales_fam_Incertae_sedis	Candida
209	SV182	Ti_Rhiz_6	0.00315026	Ti_Rhiz_6	FKDN202654743-1A	NA	NA	nov_2020	Tipple	rhizosphere	NA	5	163472	NA	ITS1-1F†	X201SC20123127-Z01-F001	k__Fungi	p__Ascomycota	c__Sordariomycetes	o__Hypocreales	f__Nectriaceae	Gibberella
268	SV20	Che_Roots_4	0.00306066	Che_Roots_4	FKDN202654756-1A	NA	NA	nov_2020	Chevallier	roots	NA	3	168529	NA	ITS1-1F†	X201SC20123127-Z01-F001	k__Fungi	p__Ascomycota	c__Leotiomycetes	o__Helotiales	f__Myxotrichaceae	Oidiodendron
506	SV51	Che_Rhiz_5	0.00304061	Che_Rhiz_5	FKDN202654752-1A	NA	NA	nov_2020	Chevallier	rhizosphere	NA	4	142946	NA	ITS1-1F†	X201SC20123127-Z01-F001	k__Fungi	p__Ascomycota	c__Eurotiomycetes	o__Eurotiales	f__Trichocomaceae	Rasamsonia
131	SV13	Che_Rhiz_5	0.00302303	Che_Rhiz_5	FKDN202654752-1A	NA	NA	nov_2020	Chevallier	rhizosphere	NA	4	142946	NA	ITS1-1F†	X201SC20123127-Z01-F001	k__Fungi	p__Ascomycota	c__Sordariomycetes	o__Conioscyphales	f__Conioscyphaceae	Conioscypha
559	SV57	Soil_2	0.0029588	Soil_2	FKDN202654735-1A	NA	NA	nov_2020	Soil	bulk_soil	NA	2	139968	NA	ITS1-1F†	X201SC20123127-Z01-F001	k__Fungi	p__Mortierellomycota	c__Mortierellomycetes	o__Mortierellales	f__Mortierellaceae	Mortierella
313	SV27	Che_Roots_5	0.00291092	Che_Roots_5	FKDN202654757-1A	NA	NA	nov_2020	Chevallier	roots	NA	4	153857	NA	ITS1-1F†	X201SC20123127-Z01-F001	k__Fungi	p__Ascomycota	c__Leotiomycetes	o__Helotiales	f__Helotiales_fam_Incertae_sedis	Leptodontidium
180	SV154	Ti_Rhiz_6	0.00289976	Ti_Rhiz_6	FKDN202654743-1A	NA	NA	nov_2020	Tipple	rhizosphere	NA	5	163472	NA	ITS1-1F†	X201SC20123127-Z01-F001	k__Fungi	p__Ascomycota	c__Sordariomycetes	o__Hypocreales	f__Nectriaceae	Fusarium
688	SV83	Che_Rhiz_4	0.00286605	Che_Rhiz_4	FKDN202654751-1A	NA	NA	nov_2020	Chevallier	rhizosphere	NA	3	143428	NA	ITS1-1F†	X201SC20123127-Z01-F001	k__Fungi	p__Basidiomycota	c__Tremellomycetes	o__Trichosporonales	f__Trichosporonaceae	Cutaneotrichosporon
698	SV83	Soil_3	0.00285053	Soil_3	FKDN202654736-1A	NA	NA	nov_2020	Soil	bulk_soil	NA	3	158868	NA	ITS1-1F†	X201SC20123127-Z01-F001	k__Fungi	p__Basidiomycota	c__Tremellomycetes	o__Trichosporonales	f__Trichosporonaceae	Cutaneotrichosporon
165	SV15	Che_Roots_5	0.00279478	Che_Roots_5	FKDN202654757-1A	NA	NA	nov_2020	Chevallier	roots	NA	4	153857	NA	ITS1-1F†	X201SC20123127-Z01-F001	k__Fungi	p__Basidiomycota	c__Agaricomycetes	o__Auriculariales	f__Exidiaceae	Basidiodendron
291	SV26	Soil_4	0.00271742	Soil_4	FKDN202654737-1A	NA	NA	nov_2020	Soil	bulk_soil	NA	4	134188	NA	ITS1-1F†	X201SC20123127-Z01-F001	k__Fungi	p__Ascomycota	c__Leotiomycetes	o__Helotiales	f__Helotiaceae	Meliniomyces
503	SV51	Soil_3	0.00268886	Soil_3	FKDN202654736-1A	NA	NA	nov_2020	Soil	bulk_soil	NA	3	158868	NA	ITS1-1F†	X201SC20123127-Z01-F001	k__Fungi	p__Ascomycota	c__Eurotiomycetes	o__Eurotiales	f__Trichocomaceae	Rasamsonia
129	SV13	Soil_2	0.00268554	Soil_2	FKDN202654735-1A	NA	NA	nov_2020	Soil	bulk_soil	NA	2	139968	NA	ITS1-1F†	X201SC20123127-Z01-F001	k__Fungi	p__Ascomycota	c__Sordariomycetes	o__Conioscyphales	f__Conioscyphaceae	Conioscypha
315	SV27	Ti_Rhiz_2	0.00264642	Ti_Rhiz_2	FKDN202654740-1A	NA	NA	nov_2020	Tipple	rhizosphere	NA	2	145607	NA	ITS1-1F†	X201SC20123127-Z01-F001	k__Fungi	p__Ascomycota	c__Leotiomycetes	o__Helotiales	f__Helotiales_fam_Incertae_sedis	Leptodontidium
504	SV51	Soil_2	0.00261958	Soil_2	FKDN202654735-1A	NA	NA	nov_2020	Soil	bulk_soil	NA	2	139968	NA	ITS1-1F†	X201SC20123127-Z01-F001	k__Fungi	p__Ascomycota	c__Eurotiomycetes	o__Eurotiales	f__Trichocomaceae	Rasamsonia
695	SV83	Ti_Roots_2	0.00255758	Ti_Roots_2	FKDN202654745-1A	NA	NA	nov_2020	Tipple	roots	NA	2	166122	NA	ITS1-1F†	X201SC20123127-Z01-F001	k__Fungi	p__Basidiomycota	c__Tremellomycetes	o__Trichosporonales	f__Trichosporonaceae	Cutaneotrichosporon
572	SV57	Che_Roots_3	0.00250846	Che_Roots_3	FKDN202654755-1A	NA	NA	nov_2020	Chevallier	roots	NA	2	153822	NA	ITS1-1F†	X201SC20123127-Z01-F001	k__Fungi	p__Mortierellomycota	c__Mortierellomycetes	o__Mortierellales	f__Mortierellaceae	Mortierella
693	SV83	Ti_Roots_4	0.00247045	Ti_Roots_4	FKDN202654746-1A	NA	NA	nov_2020	Tipple	roots	NA	3	151349	NA	ITS1-1F†	X201SC20123127-Z01-F001	k__Fungi	p__Basidiomycota	c__Tremellomycetes	o__Trichosporonales	f__Trichosporonaceae	Cutaneotrichosporon
542	SV54	Soil_2	0.00245939	Soil_2	FKDN202654735-1A	NA	NA	nov_2020	Soil	bulk_soil	NA	2	139968	NA	ITS1-1F†	X201SC20123127-Z01-F001	k__Fungi	p__Ascomycota	c__Archaeorhizomycetes	o__Archaeorhizomycetales	f__Archaeorhizomycetaceae	Archaeorhizomyces
308	SV27	Che_Roots_6	0.00236456	Che_Roots_6	FKDN202654758-1A	NA	NA	nov_2020	Chevallier	roots	NA	5	159052	NA	ITS1-1F†	X201SC20123127-Z01-F001	k__Fungi	p__Ascomycota	c__Leotiomycetes	o__Helotiales	f__Helotiales_fam_Incertae_sedis	Leptodontidium
541	SV54	Ti_Rhiz_4	0.0023624	Ti_Rhiz_4	FKDN202654741-1A	NA	NA	nov_2020	Tipple	rhizosphere	NA	3	155460	NA	ITS1-1F†	X201SC20123127-Z01-F001	k__Fungi	p__Ascomycota	c__Archaeorhizomycetes	o__Archaeorhizomycetales	f__Archaeorhizomycetaceae	Archaeorhizomyces
563	SV57	Soil_4	0.00235223	Soil_4	FKDN202654737-1A	NA	NA	nov_2020	Soil	bulk_soil	NA	4	134188	NA	ITS1-1F†	X201SC20123127-Z01-F001	k__Fungi	p__Mortierellomycota	c__Mortierellomycetes	o__Mortierellales	f__Mortierellaceae	Mortierella
742	SV93	Soil_1	0.00228938	Soil_1	FKDN202654734-1A	NA	NA	nov_2020	Soil	bulk_soil	NA	1	168870	NA	ITS1-1F†	X201SC20123127-Z01-F001	k__Fungi	p__Basidiomycota	c__Agaricomycetes	o__Cantharellales	f__Cantharellales_fam_Incertae_sedis	Sistotrema
386	SV43	Ti_Rhiz_2	0.00228043	Ti_Rhiz_2	FKDN202654740-1A	NA	NA	nov_2020	Tipple	rhizosphere	NA	2	145607	NA	ITS1-1F†	X201SC20123127-Z01-F001	k__Fungi	p__Ascomycota	c__Sordariomycetes	o__Hypocreales	f__Hypocreales_fam_Incertae_sedis	Acremonium
288	SV26	Ti_Rhiz_2	0.00226166	Ti_Rhiz_2	FKDN202654740-1A	NA	NA	nov_2020	Tipple	rhizosphere	NA	2	145607	NA	ITS1-1F†	X201SC20123127-Z01-F001	k__Fungi	p__Ascomycota	c__Leotiomycetes	o__Helotiales	f__Helotiaceae	Meliniomyces
509	SV51	Ti_Rhiz_1	0.00225331	Ti_Rhiz_1	FKDN202654739-1A	NA	NA	nov_2020	Tipple	rhizosphere	NA	1	140148	NA	ITS1-1F†	X201SC20123127-Z01-F001	k__Fungi	p__Ascomycota	c__Eurotiomycetes	o__Eurotiales	f__Trichocomaceae	Rasamsonia
475	SV5	Ti_Roots_6	0.00222586	Ti_Roots_6	FKDN202654748-1A	NA	NA	nov_2020	Tipple	roots	NA	5	132836	NA	ITS1-1F†	X201SC20123127-Z01-F001	k__Fungi	p__Ascomycota	c__Sordariomycetes	o__Sordariales	f__Lasiosphaeriaceae	Fimetariella
592	SV59	Soil_2	0.00222381	Soil_2	FKDN202654735-1A	NA	NA	nov_2020	Soil	bulk_soil	NA	2	139968	NA	ITS1-1F†	X201SC20123127-Z01-F001	k__Fungi	p__Ascomycota	c__Saccharomycetes	o__Saccharomycetales	f__Trichomonascaceae	Blastobotrys
697	SV83	Soil_4	0.00220186	Soil_4	FKDN202654737-1A	NA	NA	nov_2020	Soil	bulk_soil	NA	4	134188	NA	ITS1-1F†	X201SC20123127-Z01-F001	k__Fungi	p__Basidiomycota	c__Tremellomycetes	o__Trichosporonales	f__Trichosporonaceae	Cutaneotrichosporon
457	SV5	Che_Rhiz_2	0.00218107	Che_Rhiz_2	FKDN202654749-1A	NA	NA	nov_2020	Chevallier	rhizosphere	NA	1	157371	NA	ITS1-1F†	X201SC20123127-Z01-F001	k__Fungi	p__Ascomycota	c__Sordariomycetes	o__Sordariales	f__Lasiosphaeriaceae	Fimetariella
530	SV54	Che_Rhiz_5	0.0021794	Che_Rhiz_5	FKDN202654752-1A	NA	NA	nov_2020	Chevallier	rhizosphere	NA	4	142946	NA	ITS1-1F†	X201SC20123127-Z01-F001	k__Fungi	p__Ascomycota	c__Archaeorhizomycetes	o__Archaeorhizomycetales	f__Archaeorhizomycetaceae	Archaeorhizomyces
610	SV64	Soil_2	0.00216728	Soil_2	FKDN202654735-1A	NA	NA	nov_2020	Soil	bulk_soil	NA	2	139968	NA	ITS1-1F†	X201SC20123127-Z01-F001	k__Fungi	p__Ascomycota	c__Sordariomycetes	o__Sordariales	f__Cephalothecaceae	Phialemonium
435	SV49	Che_Roots_4	0.00216709	Che_Roots_4	FKDN202654756-1A	NA	NA	nov_2020	Chevallier	roots	NA	3	168529	NA	ITS1-1F†	X201SC20123127-Z01-F001	k__Fungi	p__Basidiomycota	c__Tremellomycetes	o__Filobasidiales	f__Piskurozymaceae	Solicoccozyma
148	SV13	Ti_Rhiz_2	0.00215843	Ti_Rhiz_2	FKDN202654740-1A	NA	NA	nov_2020	Tipple	rhizosphere	NA	2	145607	NA	ITS1-1F†	X201SC20123127-Z01-F001	k__Fungi	p__Ascomycota	c__Sordariomycetes	o__Conioscyphales	f__Conioscyphaceae	Conioscypha
348	SV4	Ti_Roots_6	0.00211987	Ti_Roots_6	FKDN202654748-1A	NA	NA	nov_2020	Tipple	roots	NA	5	132836	NA	ITS1-1F†	X201SC20123127-Z01-F001	k__Fungi	p__Ascomycota	c__Saccharomycetes	o__Saccharomycetales	f__Saccharomycetales_fam_Incertae_sedis	Candida
699	SV83	Ti_Rhiz_1	0.00210852	Ti_Rhiz_1	FKDN202654739-1A	NA	NA	nov_2020	Tipple	rhizosphere	NA	1	140148	NA	ITS1-1F†	X201SC20123127-Z01-F001	k__Fungi	p__Basidiomycota	c__Tremellomycetes	o__Trichosporonales	f__Trichosporonaceae	Cutaneotrichosporon
746	SV93	Ti_Rhiz_4	0.00209813	Ti_Rhiz_4	FKDN202654741-1A	NA	NA	nov_2020	Tipple	rhizosphere	NA	3	155460	NA	ITS1-1F†	X201SC20123127-Z01-F001	k__Fungi	p__Basidiomycota	c__Agaricomycetes	o__Cantharellales	f__Cantharellales_fam_Incertae_sedis	Sistotrema
343	SV4	Che_Rhiz_2	0.00208257	Che_Rhiz_2	FKDN202654749-1A	NA	NA	nov_2020	Chevallier	rhizosphere	NA	1	157371	NA	ITS1-1F†	X201SC20123127-Z01-F001	k__Fungi	p__Ascomycota	c__Saccharomycetes	o__Saccharomycetales	f__Saccharomycetales_fam_Incertae_sedis	Candida
552	SV57	Soil_3	0.00201664	Soil_3	FKDN202654736-1A	NA	NA	nov_2020	Soil	bulk_soil	NA	3	158868	NA	ITS1-1F†	X201SC20123127-Z01-F001	k__Fungi	p__Mortierellomycota	c__Mortierellomycetes	o__Mortierellales	f__Mortierellaceae	Mortierella
736	SV93	Soil_3	0.00199963	Soil_3	FKDN202654736-1A	NA	NA	nov_2020	Soil	bulk_soil	NA	3	158868	NA	ITS1-1F†	X201SC20123127-Z01-F001	k__Fungi	p__Basidiomycota	c__Agaricomycetes	o__Cantharellales	f__Cantharellales_fam_Incertae_sedis	Sistotrema
590	SV59	Soil_5	0.00199522	Soil_5	FKDN202654738-1A	NA	NA	nov_2020	Soil	bulk_soil	NA	5	160871	NA	ITS1-1F†	X201SC20123127-Z01-F001	k__Fungi	p__Ascomycota	c__Saccharomycetes	o__Saccharomycetales	f__Trichomonascaceae	Blastobotrys
594	SV59	Soil_1	0.00195638	Soil_1	FKDN202654734-1A	NA	NA	nov_2020	Soil	bulk_soil	NA	1	168870	NA	ITS1-1F†	X201SC20123127-Z01-F001	k__Fungi	p__Ascomycota	c__Saccharomycetes	o__Saccharomycetales	f__Trichomonascaceae	Blastobotrys
74	SV12	Ti_Roots_5	0.00193599	Ti_Roots_5	FKDN202654747-1A	NA	NA	nov_2020	Tipple	roots	NA	4	147810	NA	ITS1-1F†	X201SC20123127-Z01-F001	k__Fungi	p__Ascomycota	c__Eurotiomycetes	o__Eurotiales	f__Aspergillaceae	Penicillium
532	SV54	Che_Roots_3	0.0019178	Che_Roots_3	FKDN202654755-1A	NA	NA	nov_2020	Chevallier	roots	NA	2	153822	NA	ITS1-1F†	X201SC20123127-Z01-F001	k__Fungi	p__Ascomycota	c__Archaeorhizomycetes	o__Archaeorhizomycetales	f__Archaeorhizomycetaceae	Archaeorhizomyces
79	SV120	Che_Roots_4	0.00187861	Che_Roots_4	FKDN202654756-1A	NA	NA	nov_2020	Chevallier	roots	NA	3	168529	NA	ITS1-1F†	X201SC20123127-Z01-F001	k__Fungi	p__Ascomycota	c__Sordariomycetes	o__Hypocreales	f__Nectriaceae	Ilyonectria
123	SV125	Ti_Rhiz_4	0.0018659	Ti_Rhiz_4	FKDN202654741-1A	NA	NA	nov_2020	Tipple	rhizosphere	NA	3	155460	NA	ITS1-1F†	X201SC20123127-Z01-F001	k__Fungi	p__Ascomycota	c__Leotiomycetes	o__Helotiales	f__Hyaloscyphaceae	Hyaloscypha
139	SV13	Che_Rhiz_3	0.00186443	Che_Rhiz_3	FKDN202654750-1A	NA	NA	nov_2020	Chevallier	rhizosphere	NA	2	148574	NA	ITS1-1F†	X201SC20123127-Z01-F001	k__Fungi	p__Ascomycota	c__Sordariomycetes	o__Conioscyphales	f__Conioscyphaceae	Conioscypha
686	SV83	Soil_1	0.00184815	Soil_1	FKDN202654734-1A	NA	NA	nov_2020	Soil	bulk_soil	NA	1	168870	NA	ITS1-1F†	X201SC20123127-Z01-F001	k__Fungi	p__Basidiomycota	c__Tremellomycetes	o__Trichosporonales	f__Trichosporonaceae	Cutaneotrichosporon
380	SV43	Soil_5	0.00184496	Soil_5	FKDN202654738-1A	NA	NA	nov_2020	Soil	bulk_soil	NA	5	160871	NA	ITS1-1F†	X201SC20123127-Z01-F001	k__Fungi	p__Ascomycota	c__Sordariomycetes	o__Hypocreales	f__Hypocreales_fam_Incertae_sedis	Acremonium
694	SV83	Ti_Rhiz_2	0.00183936	Ti_Rhiz_2	FKDN202654740-1A	NA	NA	nov_2020	Tipple	rhizosphere	NA	2	145607	NA	ITS1-1F†	X201SC20123127-Z01-F001	k__Fungi	p__Basidiomycota	c__Tremellomycetes	o__Trichosporonales	f__Trichosporonaceae	Cutaneotrichosporon
212	SV182	Che_Roots_4	0.0018364	Che_Roots_4	FKDN202654756-1A	NA	NA	nov_2020	Chevallier	roots	NA	3	168529	NA	ITS1-1F†	X201SC20123127-Z01-F001	k__Fungi	p__Ascomycota	c__Sordariomycetes	o__Hypocreales	f__Nectriaceae	Gibberella
137	SV13	Ti_Roots_5	0.00183333	Ti_Roots_5	FKDN202654747-1A	NA	NA	nov_2020	Tipple	roots	NA	4	147810	NA	ITS1-1F†	X201SC20123127-Z01-F001	k__Fungi	p__Ascomycota	c__Sordariomycetes	o__Conioscyphales	f__Conioscyphaceae	Conioscypha
61	SV12	Che_Roots_3	0.0018303	Che_Roots_3	FKDN202654755-1A	NA	NA	nov_2020	Chevallier	roots	NA	2	153822	NA	ITS1-1F†	X201SC20123127-Z01-F001	k__Fungi	p__Ascomycota	c__Eurotiomycetes	o__Eurotiales	f__Aspergillaceae	Penicillium
145	SV13	Ti_Roots_1	0.00182364	Ti_Roots_1	FKDN202654744-1A	NA	NA	nov_2020	Tipple	roots	NA	1	138221	NA	ITS1-1F†	X201SC20123127-Z01-F001	k__Fungi	p__Ascomycota	c__Sordariomycetes	o__Conioscyphales	f__Conioscyphaceae	Conioscypha
715	SV9	Ti_Roots_4	0.00178421	Ti_Roots_4	FKDN202654746-1A	NA	NA	nov_2020	Tipple	roots	NA	3	151349	NA	ITS1-1F†	X201SC20123127-Z01-F001	k__Fungi	p__Ascomycota	c__Sordariomycetes	o__Hypocreales	f__Hypocreaceae	Trichoderma
568	SV57	Che_Roots_4	0.00176604	Che_Roots_4	FKDN202654756-1A	NA	NA	nov_2020	Chevallier	roots	NA	3	168529	NA	ITS1-1F†	X201SC20123127-Z01-F001	k__Fungi	p__Mortierellomycota	c__Mortierellomycetes	o__Mortierellales	f__Mortierellaceae	Mortierella
524	SV51	Ti_Rhiz_6	0.00176111	Ti_Rhiz_6	FKDN202654743-1A	NA	NA	nov_2020	Tipple	rhizosphere	NA	5	163472	NA	ITS1-1F†	X201SC20123127-Z01-F001	k__Fungi	p__Ascomycota	c__Eurotiomycetes	o__Eurotiales	f__Trichocomaceae	Rasamsonia
480	SV50	Che_Roots_4	0.001759	Che_Roots_4	FKDN202654756-1A	NA	NA	nov_2020	Chevallier	roots	NA	3	168529	NA	ITS1-1F†	X201SC20123127-Z01-F001	k__Fungi	p__Ascomycota	c__Sordariomycetes	o__Myrmecridiales	f__Myrmecridiales_fam_Incertae_sedis	Goidanichiella
587	SV59	Ti_Rhiz_4	0.00173777	Ti_Rhiz_4	FKDN202654741-1A	NA	NA	nov_2020	Tipple	rhizosphere	NA	3	155460	NA	ITS1-1F†	X201SC20123127-Z01-F001	k__Fungi	p__Ascomycota	c__Saccharomycetes	o__Saccharomycetales	f__Trichomonascaceae	Blastobotrys
685	SV83	Ti_Roots_1	0.00173246	Ti_Roots_1	FKDN202654744-1A	NA	NA	nov_2020	Tipple	roots	NA	1	138221	NA	ITS1-1F†	X201SC20123127-Z01-F001	k__Fungi	p__Basidiomycota	c__Tremellomycetes	o__Trichosporonales	f__Trichosporonaceae	Cutaneotrichosporon
471	SV5	Ti_Roots_2	0.00172702	Ti_Roots_2	FKDN202654745-1A	NA	NA	nov_2020	Tipple	roots	NA	2	166122	NA	ITS1-1F†	X201SC20123127-Z01-F001	k__Fungi	p__Ascomycota	c__Sordariomycetes	o__Sordariales	f__Lasiosphaeriaceae	Fimetariella
679	SV83	Che_Roots_3	0.00170634	Che_Roots_3	FKDN202654755-1A	NA	NA	nov_2020	Chevallier	roots	NA	2	153822	NA	ITS1-1F†	X201SC20123127-Z01-F001	k__Fungi	p__Basidiomycota	c__Tremellomycetes	o__Trichosporonales	f__Trichosporonaceae	Cutaneotrichosporon
567	SV57	Ti_Roots_5	0.00170133	Ti_Roots_5	FKDN202654747-1A	NA	NA	nov_2020	Tipple	roots	NA	4	147810	NA	ITS1-1F†	X201SC20123127-Z01-F001	k__Fungi	p__Mortierellomycota	c__Mortierellomycetes	o__Mortierellales	f__Mortierellaceae	Mortierella
90	SV120	Che_Roots_5	0.00169138	Che_Roots_5	FKDN202654757-1A	NA	NA	nov_2020	Chevallier	roots	NA	4	153857	NA	ITS1-1F†	X201SC20123127-Z01-F001	k__Fungi	p__Ascomycota	c__Sordariomycetes	o__Hypocreales	f__Nectriaceae	Ilyonectria
285	SV26	Che_Rhiz_5	0.00167849	Che_Rhiz_5	FKDN202654752-1A	NA	NA	nov_2020	Chevallier	rhizosphere	NA	4	142946	NA	ITS1-1F†	X201SC20123127-Z01-F001	k__Fungi	p__Ascomycota	c__Leotiomycetes	o__Helotiales	f__Helotiaceae	Meliniomyces
596	SV59	Soil_3	0.00166777	Soil_3	FKDN202654736-1A	NA	NA	nov_2020	Soil	bulk_soil	NA	3	158868	NA	ITS1-1F†	X201SC20123127-Z01-F001	k__Fungi	p__Ascomycota	c__Saccharomycetes	o__Saccharomycetales	f__Trichomonascaceae	Blastobotrys
565	SV57	Ti_Roots_2	0.00162815	Ti_Roots_2	FKDN202654745-1A	NA	NA	nov_2020	Tipple	roots	NA	2	166122	NA	ITS1-1F†	X201SC20123127-Z01-F001	k__Fungi	p__Mortierellomycota	c__Mortierellomycetes	o__Mortierellales	f__Mortierellaceae	Mortierella
687	SV83	Ti_Roots_5	0.00156933	Ti_Roots_5	FKDN202654747-1A	NA	NA	nov_2020	Tipple	roots	NA	4	147810	NA	ITS1-1F†	X201SC20123127-Z01-F001	k__Fungi	p__Basidiomycota	c__Tremellomycetes	o__Trichosporonales	f__Trichosporonaceae	Cutaneotrichosporon
39	SV100	Soil_2	0.00150767	Soil_2	FKDN202654735-1A	NA	NA	nov_2020	Soil	bulk_soil	NA	2	139968	NA	ITS1-1F†	X201SC20123127-Z01-F001	k__Fungi	p__Basidiomycota	c__Microbotryomycetes	o__Microbotryales	f__Ustilentylomataceae	Bauerago
99	SV120	Ti_Roots_5	0.00146666	Ti_Roots_5	FKDN202654747-1A	NA	NA	nov_2020	Tipple	roots	NA	4	147810	NA	ITS1-1F†	X201SC20123127-Z01-F001	k__Fungi	p__Ascomycota	c__Sordariomycetes	o__Hypocreales	f__Nectriaceae	Ilyonectria
35	SV100	Ti_Rhiz_4	0.00144947	Ti_Rhiz_4	FKDN202654741-1A	NA	NA	nov_2020	Tipple	rhizosphere	NA	3	155460	NA	ITS1-1F†	X201SC20123127-Z01-F001	k__Fungi	p__Basidiomycota	c__Microbotryomycetes	o__Microbotryales	f__Ustilentylomataceae	Bauerago
623	SV64	Ti_Rhiz_5	0.00144308	Ti_Rhiz_5	FKDN202654742-1A	NA	NA	nov_2020	Tipple	rhizosphere	NA	4	137928	NA	ITS1-1F†	X201SC20123127-Z01-F001	k__Fungi	p__Ascomycota	c__Sordariomycetes	o__Sordariales	f__Cephalothecaceae	Phialemonium
558	SV57	Che_Roots_5	0.00143005	Che_Roots_5	FKDN202654757-1A	NA	NA	nov_2020	Chevallier	roots	NA	4	153857	NA	ITS1-1F†	X201SC20123127-Z01-F001	k__Fungi	p__Mortierellomycota	c__Mortierellomycetes	o__Mortierellales	f__Mortierellaceae	Mortierella
183	SV154	Ti_Rhiz_2	0.00141706	Ti_Rhiz_2	FKDN202654740-1A	NA	NA	nov_2020	Tipple	rhizosphere	NA	2	145607	NA	ITS1-1F†	X201SC20123127-Z01-F001	k__Fungi	p__Ascomycota	c__Sordariomycetes	o__Hypocreales	f__Nectriaceae	Fusarium
556	SV57	Soil_1	0.0013986	Soil_1	FKDN202654734-1A	NA	NA	nov_2020	Soil	bulk_soil	NA	1	168870	NA	ITS1-1F†	X201SC20123127-Z01-F001	k__Fungi	p__Mortierellomycota	c__Mortierellomycetes	o__Mortierellales	f__Mortierellaceae	Mortierella
561	SV57	Soil_5	0.00137746	Soil_5	FKDN202654738-1A	NA	NA	nov_2020	Soil	bulk_soil	NA	5	160871	NA	ITS1-1F†	X201SC20123127-Z01-F001	k__Fungi	p__Mortierellomycota	c__Mortierellomycetes	o__Mortierellales	f__Mortierellaceae	Mortierella
106	SV125	Ti_Rhiz_1	0.00137552	Ti_Rhiz_1	FKDN202654739-1A	NA	NA	nov_2020	Tipple	rhizosphere	NA	1	140148	NA	ITS1-1F†	X201SC20123127-Z01-F001	k__Fungi	p__Ascomycota	c__Leotiomycetes	o__Helotiales	f__Hyaloscyphaceae	Hyaloscypha
71	SV12	Ti_Roots_4	0.00135633	Ti_Roots_4	FKDN202654746-1A	NA	NA	nov_2020	Tipple	roots	NA	3	151349	NA	ITS1-1F†	X201SC20123127-Z01-F001	k__Fungi	p__Ascomycota	c__Eurotiomycetes	o__Eurotiales	f__Aspergillaceae	Penicillium
690	SV83	Che_Rhiz_2	0.00135086	Che_Rhiz_2	FKDN202654749-1A	NA	NA	nov_2020	Chevallier	rhizosphere	NA	1	157371	NA	ITS1-1F†	X201SC20123127-Z01-F001	k__Fungi	p__Basidiomycota	c__Tremellomycetes	o__Trichosporonales	f__Trichosporonaceae	Cutaneotrichosporon
586	SV59	Che_Roots_5	0.0013502	Che_Roots_5	FKDN202654757-1A	NA	NA	nov_2020	Chevallier	roots	NA	4	153857	NA	ITS1-1F†	X201SC20123127-Z01-F001	k__Fungi	p__Ascomycota	c__Saccharomycetes	o__Saccharomycetales	f__Trichomonascaceae	Blastobotrys
733	SV93	Ti_Rhiz_1	0.00133932	Ti_Rhiz_1	FKDN202654739-1A	NA	NA	nov_2020	Tipple	rhizosphere	NA	1	140148	NA	ITS1-1F†	X201SC20123127-Z01-F001	k__Fungi	p__Basidiomycota	c__Agaricomycetes	o__Cantharellales	f__Cantharellales_fam_Incertae_sedis	Sistotrema
385	SV43	Che_Roots_4	0.00131573	Che_Roots_4	FKDN202654756-1A	NA	NA	nov_2020	Chevallier	roots	NA	3	168529	NA	ITS1-1F†	X201SC20123127-Z01-F001	k__Fungi	p__Ascomycota	c__Sordariomycetes	o__Hypocreales	f__Hypocreales_fam_Incertae_sedis	Acremonium
43	SV100	Soil_4	0.00131038	Soil_4	FKDN202654737-1A	NA	NA	nov_2020	Soil	bulk_soil	NA	4	134188	NA	ITS1-1F†	X201SC20123127-Z01-F001	k__Fungi	p__Basidiomycota	c__Microbotryomycetes	o__Microbotryales	f__Ustilentylomataceae	Bauerago
682	SV83	Ti_Rhiz_6	0.00130565	Ti_Rhiz_6	FKDN202654743-1A	NA	NA	nov_2020	Tipple	rhizosphere	NA	5	163472	NA	ITS1-1F†	X201SC20123127-Z01-F001	k__Fungi	p__Basidiomycota	c__Tremellomycetes	o__Trichosporonales	f__Trichosporonaceae	Cutaneotrichosporon
611	SV64	Soil_1	0.0012987	Soil_1	FKDN202654734-1A	NA	NA	nov_2020	Soil	bulk_soil	NA	1	168870	NA	ITS1-1F†	X201SC20123127-Z01-F001	k__Fungi	p__Ascomycota	c__Sordariomycetes	o__Sordariales	f__Cephalothecaceae	Phialemonium
607	SV64	Soil_5	0.00129397	Soil_5	FKDN202654738-1A	NA	NA	nov_2020	Soil	bulk_soil	NA	5	160871	NA	ITS1-1F†	X201SC20123127-Z01-F001	k__Fungi	p__Ascomycota	c__Sordariomycetes	o__Sordariales	f__Cephalothecaceae	Phialemonium
683	SV83	Ti_Rhiz_5	0.00128754	Ti_Rhiz_5	FKDN202654742-1A	NA	NA	nov_2020	Tipple	rhizosphere	NA	4	137928	NA	ITS1-1F†	X201SC20123127-Z01-F001	k__Fungi	p__Basidiomycota	c__Tremellomycetes	o__Trichosporonales	f__Trichosporonaceae	Cutaneotrichosporon
408	SV48	Ti_Rhiz_5	0.00127889	Ti_Rhiz_5	FKDN202654742-1A	NA	NA	nov_2020	Tipple	rhizosphere	NA	4	137928	NA	ITS1-1F†	X201SC20123127-Z01-F001	k__Fungi	p__Ascomycota	c__Sordariomycetes	o__Sordariales	f__Chaetomiaceae	Chaetomium
331	SV4	Che_Rhiz_6	0.0012693	Che_Rhiz_6	FKDN202654753-1A	NA	NA	nov_2020	Chevallier	rhizosphere	NA	5	152328	NA	ITS1-1F†	X201SC20123127-Z01-F001	k__Fungi	p__Ascomycota	c__Saccharomycetes	o__Saccharomycetales	f__Saccharomycetales_fam_Incertae_sedis	Candida
526	SV54	Che_Rhiz_6	0.00126221	Che_Rhiz_6	FKDN202654753-1A	NA	NA	nov_2020	Chevallier	rhizosphere	NA	5	152328	NA	ITS1-1F†	X201SC20123127-Z01-F001	k__Fungi	p__Ascomycota	c__Archaeorhizomycetes	o__Archaeorhizomycetales	f__Archaeorhizomycetaceae	Archaeorhizomyces
734	SV93	Soil_5	0.00126058	Soil_5	FKDN202654738-1A	NA	NA	nov_2020	Soil	bulk_soil	NA	5	160871	NA	ITS1-1F†	X201SC20123127-Z01-F001	k__Fungi	p__Basidiomycota	c__Agaricomycetes	o__Cantharellales	f__Cantharellales_fam_Incertae_sedis	Sistotrema
75	SV12	Ti_Roots_2	0.00125242	Ti_Roots_2	FKDN202654745-1A	NA	NA	nov_2020	Tipple	roots	NA	2	166122	NA	ITS1-1F†	X201SC20123127-Z01-F001	k__Fungi	p__Ascomycota	c__Eurotiomycetes	o__Eurotiales	f__Aspergillaceae	Penicillium
272	SV20	Che_Roots_3	0.00123965	Che_Roots_3	FKDN202654755-1A	NA	NA	nov_2020	Chevallier	roots	NA	2	153822	NA	ITS1-1F†	X201SC20123127-Z01-F001	k__Fungi	p__Ascomycota	c__Leotiomycetes	o__Helotiales	f__Myxotrichaceae	Oidiodendron
564	SV57	Ti_Roots_4	0.00121101	Ti_Roots_4	FKDN202654746-1A	NA	NA	nov_2020	Tipple	roots	NA	3	151349	NA	ITS1-1F†	X201SC20123127-Z01-F001	k__Fungi	p__Mortierellomycota	c__Mortierellomycetes	o__Mortierellales	f__Mortierellaceae	Mortierella
134	SV13	Ti_Rhiz_1	0.00120358	Ti_Rhiz_1	FKDN202654739-1A	NA	NA	nov_2020	Tipple	rhizosphere	NA	1	140148	NA	ITS1-1F†	X201SC20123127-Z01-F001	k__Fungi	p__Ascomycota	c__Sordariomycetes	o__Conioscyphales	f__Conioscyphaceae	Conioscypha
700	SV83	Ti_Roots_6	0.00117408	Ti_Roots_6	FKDN202654748-1A	NA	NA	nov_2020	Tipple	roots	NA	5	132836	NA	ITS1-1F†	X201SC20123127-Z01-F001	k__Fungi	p__Basidiomycota	c__Tremellomycetes	o__Trichosporonales	f__Trichosporonaceae	Cutaneotrichosporon
214	SV182	Che_Roots_5	0.00116872	Che_Roots_5	FKDN202654757-1A	NA	NA	nov_2020	Chevallier	roots	NA	4	153857	NA	ITS1-1F†	X201SC20123127-Z01-F001	k__Fungi	p__Ascomycota	c__Sordariomycetes	o__Hypocreales	f__Nectriaceae	Gibberella
52	SV12	Che_Rhiz_4	0.00115248	Che_Rhiz_4	FKDN202654751-1A	NA	NA	nov_2020	Chevallier	rhizosphere	NA	3	143428	NA	ITS1-1F†	X201SC20123127-Z01-F001	k__Fungi	p__Ascomycota	c__Eurotiomycetes	o__Eurotiales	f__Aspergillaceae	Penicillium
290	SV26	Soil_5	0.00109362	Soil_5	FKDN202654738-1A	NA	NA	nov_2020	Soil	bulk_soil	NA	5	160871	NA	ITS1-1F†	X201SC20123127-Z01-F001	k__Fungi	p__Ascomycota	c__Leotiomycetes	o__Helotiales	f__Helotiaceae	Meliniomyces
692	SV83	Che_Roots_6	0.00108799	Che_Roots_6	FKDN202654758-1A	NA	NA	nov_2020	Chevallier	roots	NA	5	159052	NA	ITS1-1F†	X201SC20123127-Z01-F001	k__Fungi	p__Basidiomycota	c__Tremellomycetes	o__Trichosporonales	f__Trichosporonaceae	Cutaneotrichosporon
655	SV73	Soil_5	0.00108527	Soil_5	FKDN202654738-1A	NA	NA	nov_2020	Soil	bulk_soil	NA	5	160871	NA	ITS1-1F†	X201SC20123127-Z01-F001	k__Fungi	p__Basidiomycota	c__Agaricomycetes	o__Agaricales	f__Strophariaceae	Galerina
681	SV83	Che_Rhiz_6	0.00107784	Che_Rhiz_6	FKDN202654753-1A	NA	NA	nov_2020	Chevallier	rhizosphere	NA	5	152328	NA	ITS1-1F†	X201SC20123127-Z01-F001	k__Fungi	p__Basidiomycota	c__Tremellomycetes	o__Trichosporonales	f__Trichosporonaceae	Cutaneotrichosporon
265	SV20	Ti_Roots_2	0.00107445	Ti_Roots_2	FKDN202654745-1A	NA	NA	nov_2020	Tipple	roots	NA	2	166122	NA	ITS1-1F†	X201SC20123127-Z01-F001	k__Fungi	p__Ascomycota	c__Leotiomycetes	o__Helotiales	f__Myxotrichaceae	Oidiodendron
147	SV13	Ti_Rhiz_5	0.00105422	Ti_Rhiz_5	FKDN202654742-1A	NA	NA	nov_2020	Tipple	rhizosphere	NA	4	137928	NA	ITS1-1F†	X201SC20123127-Z01-F001	k__Fungi	p__Ascomycota	c__Sordariomycetes	o__Conioscyphales	f__Conioscyphaceae	Conioscypha
455	SV5	Che_Rhiz_4	0.00104633	Che_Rhiz_4	FKDN202654751-1A	NA	NA	nov_2020	Chevallier	rhizosphere	NA	3	143428	NA	ITS1-1F†	X201SC20123127-Z01-F001	k__Fungi	p__Ascomycota	c__Sordariomycetes	o__Sordariales	f__Lasiosphaeriaceae	Fimetariella
125	SV125	Ti_Rhiz_6	0.00103238	Ti_Rhiz_6	FKDN202654743-1A	NA	NA	nov_2020	Tipple	rhizosphere	NA	5	163472	NA	ITS1-1F†	X201SC20123127-Z01-F001	k__Fungi	p__Ascomycota	c__Leotiomycetes	o__Helotiales	f__Hyaloscyphaceae	Hyaloscypha
444	SV49	Che_Roots_5	0.00101628	Che_Roots_5	FKDN202654757-1A	NA	NA	nov_2020	Chevallier	roots	NA	4	153857	NA	ITS1-1F†	X201SC20123127-Z01-F001	k__Fungi	p__Basidiomycota	c__Tremellomycetes	o__Filobasidiales	f__Piskurozymaceae	Solicoccozyma
678	SV83	Che_Roots_5	0.00100176	Che_Roots_5	FKDN202654757-1A	NA	NA	nov_2020	Chevallier	roots	NA	4	153857	NA	ITS1-1F†	X201SC20123127-Z01-F001	k__Fungi	p__Basidiomycota	c__Tremellomycetes	o__Trichosporonales	f__Trichosporonaceae	Cutaneotrichosporon
680	SV83	Ti_Rhiz_4	0.000993009	Ti_Rhiz_4	FKDN202654741-1A	NA	NA	nov_2020	Tipple	rhizosphere	NA	3	155460	NA	ITS1-1F†	X201SC20123127-Z01-F001	k__Fungi	p__Basidiomycota	c__Tremellomycetes	o__Trichosporonales	f__Trichosporonaceae	Cutaneotrichosporon
547	SV54	Ti_Roots_2	0.000988755	Ti_Roots_2	FKDN202654745-1A	NA	NA	nov_2020	Tipple	roots	NA	2	166122	NA	ITS1-1F†	X201SC20123127-Z01-F001	k__Fungi	p__Ascomycota	c__Archaeorhizomycetes	o__Archaeorhizomycetales	f__Archaeorhizomycetaceae	Archaeorhizomyces
85	SV120	Che_Roots_6	0.000921164	Che_Roots_6	FKDN202654758-1A	NA	NA	nov_2020	Chevallier	roots	NA	5	159052	NA	ITS1-1F†	X201SC20123127-Z01-F001	k__Fungi	p__Ascomycota	c__Sordariomycetes	o__Hypocreales	f__Nectriaceae	Ilyonectria
591	SV59	Soil_4	0.000912967	Soil_4	FKDN202654737-1A	NA	NA	nov_2020	Soil	bulk_soil	NA	4	134188	NA	ITS1-1F†	X201SC20123127-Z01-F001	k__Fungi	p__Ascomycota	c__Saccharomycetes	o__Saccharomycetales	f__Trichomonascaceae	Blastobotrys
450	SV49	Ti_Roots_1	0.000911819	Ti_Roots_1	FKDN202654744-1A	NA	NA	nov_2020	Tipple	roots	NA	1	138221	NA	ITS1-1F†	X201SC20123127-Z01-F001	k__Fungi	p__Basidiomycota	c__Tremellomycetes	o__Filobasidiales	f__Piskurozymaceae	Solicoccozyma
709	SV9	Ti_Roots_5	0.000901998	Ti_Roots_5	FKDN202654747-1A	NA	NA	nov_2020	Tipple	roots	NA	4	147810	NA	ITS1-1F†	X201SC20123127-Z01-F001	k__Fungi	p__Ascomycota	c__Sordariomycetes	o__Hypocreales	f__Hypocreaceae	Trichoderma
48	SV100	Soil_3	0.000901959	Soil_3	FKDN202654736-1A	NA	NA	nov_2020	Soil	bulk_soil	NA	3	158868	NA	ITS1-1F†	X201SC20123127-Z01-F001	k__Fungi	p__Basidiomycota	c__Microbotryomycetes	o__Microbotryales	f__Ustilentylomataceae	Bauerago
640	SV70	Soil_1	0.000882451	Soil_1	FKDN202654734-1A	NA	NA	nov_2020	Soil	bulk_soil	NA	1	168870	NA	ITS1-1F†	X201SC20123127-Z01-F001	k__Fungi	p__Ascomycota	c__Eurotiomycetes	o__Eurotiales	f__Trichocomaceae	Talaromyces
689	SV83	Che_Rhiz_3	0.000879293	Che_Rhiz_3	FKDN202654750-1A	NA	NA	nov_2020	Chevallier	rhizosphere	NA	2	148574	NA	ITS1-1F†	X201SC20123127-Z01-F001	k__Fungi	p__Basidiomycota	c__Tremellomycetes	o__Trichosporonales	f__Trichosporonaceae	Cutaneotrichosporon
116	SV125	Soil_2	0.000876333	Soil_2	FKDN202654735-1A	NA	NA	nov_2020	Soil	bulk_soil	NA	2	139968	NA	ITS1-1F†	X201SC20123127-Z01-F001	k__Fungi	p__Ascomycota	c__Leotiomycetes	o__Helotiales	f__Hyaloscyphaceae	Hyaloscypha
225	SV182	Ti_Roots_6	0.000872408	Ti_Roots_6	FKDN202654748-1A	NA	NA	nov_2020	Tipple	roots	NA	5	132836	NA	ITS1-1F†	X201SC20123127-Z01-F001	k__Fungi	p__Ascomycota	c__Sordariomycetes	o__Hypocreales	f__Nectriaceae	Gibberella
738	SV93	Ti_Rhiz_6	0.000865374	Ti_Rhiz_6	FKDN202654743-1A	NA	NA	nov_2020	Tipple	rhizosphere	NA	5	163472	NA	ITS1-1F†	X201SC20123127-Z01-F001	k__Fungi	p__Basidiomycota	c__Agaricomycetes	o__Cantharellales	f__Cantharellales_fam_Incertae_sedis	Sistotrema
522	SV51	Ti_Rhiz_5	0.000829553	Ti_Rhiz_5	FKDN202654742-1A	NA	NA	nov_2020	Tipple	rhizosphere	NA	4	137928	NA	ITS1-1F†	X201SC20123127-Z01-F001	k__Fungi	p__Ascomycota	c__Eurotiomycetes	o__Eurotiales	f__Trichocomaceae	Rasamsonia
625	SV64	Ti_Rhiz_4	0.000800814	Ti_Rhiz_4	FKDN202654741-1A	NA	NA	nov_2020	Tipple	rhizosphere	NA	3	155460	NA	ITS1-1F†	X201SC20123127-Z01-F001	k__Fungi	p__Ascomycota	c__Sordariomycetes	o__Sordariales	f__Cephalothecaceae	Phialemonium
124	SV125	Ti_Rhiz_2	0.00079768	Ti_Rhiz_2	FKDN202654740-1A	NA	NA	nov_2020	Tipple	rhizosphere	NA	2	145607	NA	ITS1-1F†	X201SC20123127-Z01-F001	k__Fungi	p__Ascomycota	c__Leotiomycetes	o__Helotiales	f__Hyaloscyphaceae	Hyaloscypha
41	SV100	Soil_1	0.000790876	Soil_1	FKDN202654734-1A	NA	NA	nov_2020	Soil	bulk_soil	NA	1	168870	NA	ITS1-1F†	X201SC20123127-Z01-F001	k__Fungi	p__Basidiomycota	c__Microbotryomycetes	o__Microbotryales	f__Ustilentylomataceae	Bauerago
615	SV64	Ti_Rhiz_2	0.000778911	Ti_Rhiz_2	FKDN202654740-1A	NA	NA	nov_2020	Tipple	rhizosphere	NA	2	145607	NA	ITS1-1F†	X201SC20123127-Z01-F001	k__Fungi	p__Ascomycota	c__Sordariomycetes	o__Sordariales	f__Cephalothecaceae	Phialemonium
101	SV125	Soil_3	0.000774323	Soil_3	FKDN202654736-1A	NA	NA	nov_2020	Soil	bulk_soil	NA	3	158868	NA	ITS1-1F†	X201SC20123127-Z01-F001	k__Fungi	p__Ascomycota	c__Leotiomycetes	o__Helotiales	f__Hyaloscyphaceae	Hyaloscypha
566	SV57	Che_Rhiz_6	0.000758741	Che_Rhiz_6	FKDN202654753-1A	NA	NA	nov_2020	Chevallier	rhizosphere	NA	5	152328	NA	ITS1-1F†	X201SC20123127-Z01-F001	k__Fungi	p__Mortierellomycota	c__Mortierellomycetes	o__Mortierellales	f__Mortierellaceae	Mortierella
520	SV51	Ti_Roots_1	0.000754323	Ti_Roots_1	FKDN202654744-1A	NA	NA	nov_2020	Tipple	roots	NA	1	138221	NA	ITS1-1F†	X201SC20123127-Z01-F001	k__Fungi	p__Ascomycota	c__Eurotiomycetes	o__Eurotiales	f__Trichocomaceae	Rasamsonia
300	SV26	Ti_Roots_2	0.000751453	Ti_Roots_2	FKDN202654745-1A	NA	NA	nov_2020	Tipple	roots	NA	2	166122	NA	ITS1-1F†	X201SC20123127-Z01-F001	k__Fungi	p__Ascomycota	c__Leotiomycetes	o__Helotiales	f__Helotiaceae	Meliniomyces
194	SV154	Ti_Roots_5	0.000740665	Ti_Roots_5	FKDN202654747-1A	NA	NA	nov_2020	Tipple	roots	NA	4	147810	NA	ITS1-1F†	X201SC20123127-Z01-F001	k__Fungi	p__Ascomycota	c__Sordariomycetes	o__Hypocreales	f__Nectriaceae	Fusarium
63	SV12	Che_Roots_2	0.000726058	Che_Roots_2	FKDN202654754-1A	NA	NA	nov_2020	Chevallier	roots	NA	1	169149	NA	ITS1-1F†	X201SC20123127-Z01-F001	k__Fungi	p__Ascomycota	c__Eurotiomycetes	o__Eurotiales	f__Aspergillaceae	Penicillium
113	SV125	Soil_1	0.000715951	Soil_1	FKDN202654734-1A	NA	NA	nov_2020	Soil	bulk_soil	NA	1	168870	NA	ITS1-1F†	X201SC20123127-Z01-F001	k__Fungi	p__Ascomycota	c__Leotiomycetes	o__Helotiales	f__Hyaloscyphaceae	Hyaloscypha
605	SV64	Soil_3	0.00071476	Soil_3	FKDN202654736-1A	NA	NA	nov_2020	Soil	bulk_soil	NA	3	158868	NA	ITS1-1F†	X201SC20123127-Z01-F001	k__Fungi	p__Ascomycota	c__Sordariomycetes	o__Sordariales	f__Cephalothecaceae	Phialemonium
691	SV83	Che_Rhiz_5	0.000711819	Che_Rhiz_5	FKDN202654752-1A	NA	NA	nov_2020	Chevallier	rhizosphere	NA	4	142946	NA	ITS1-1F†	X201SC20123127-Z01-F001	k__Fungi	p__Basidiomycota	c__Tremellomycetes	o__Trichosporonales	f__Trichosporonaceae	Cutaneotrichosporon
458	SV5	Che_Roots_2	0.000706782	Che_Roots_2	FKDN202654754-1A	NA	NA	nov_2020	Chevallier	roots	NA	1	169149	NA	ITS1-1F†	X201SC20123127-Z01-F001	k__Fungi	p__Ascomycota	c__Sordariomycetes	o__Sordariales	f__Lasiosphaeriaceae	Fimetariella
424	SV48	Ti_Rhiz_1	0.000705857	Ti_Rhiz_1	FKDN202654739-1A	NA	NA	nov_2020	Tipple	rhizosphere	NA	1	140148	NA	ITS1-1F†	X201SC20123127-Z01-F001	k__Fungi	p__Ascomycota	c__Sordariomycetes	o__Sordariales	f__Chaetomiaceae	Chaetomium
507	SV51	Che_Roots_5	0.000696879	Che_Roots_5	FKDN202654757-1A	NA	NA	nov_2020	Chevallier	roots	NA	4	153857	NA	ITS1-1F†	X201SC20123127-Z01-F001	k__Fungi	p__Ascomycota	c__Eurotiomycetes	o__Eurotiales	f__Trichocomaceae	Rasamsonia
731	SV93	Soil_4	0.000687411	Soil_4	FKDN202654737-1A	NA	NA	nov_2020	Soil	bulk_soil	NA	4	134188	NA	ITS1-1F†	X201SC20123127-Z01-F001	k__Fungi	p__Basidiomycota	c__Agaricomycetes	o__Cantharellales	f__Cantharellales_fam_Incertae_sedis	Sistotrema
589	SV59	Ti_Roots_1	0.000663141	Ti_Roots_1	FKDN202654744-1A	NA	NA	nov_2020	Tipple	roots	NA	1	138221	NA	ITS1-1F†	X201SC20123127-Z01-F001	k__Fungi	p__Ascomycota	c__Saccharomycetes	o__Saccharomycetales	f__Trichomonascaceae	Blastobotrys
189	SV154	Che_Roots_6	0.000660047	Che_Roots_6	FKDN202654758-1A	NA	NA	nov_2020	Chevallier	roots	NA	5	159052	NA	ITS1-1F†	X201SC20123127-Z01-F001	k__Fungi	p__Ascomycota	c__Sordariomycetes	o__Hypocreales	f__Nectriaceae	Fusarium
37	SV100	Ti_Rhiz_6	0.000652826	Ti_Rhiz_6	FKDN202654743-1A	NA	NA	nov_2020	Tipple	rhizosphere	NA	5	163472	NA	ITS1-1F†	X201SC20123127-Z01-F001	k__Fungi	p__Basidiomycota	c__Microbotryomycetes	o__Microbotryales	f__Ustilentylomataceae	Bauerago
295	SV26	Ti_Roots_5	0.000652665	Ti_Roots_5	FKDN202654747-1A	NA	NA	nov_2020	Tipple	roots	NA	4	147810	NA	ITS1-1F†	X201SC20123127-Z01-F001	k__Fungi	p__Ascomycota	c__Leotiomycetes	o__Helotiales	f__Helotiaceae	Meliniomyces
609	SV64	Soil_4	0.000644448	Soil_4	FKDN202654737-1A	NA	NA	nov_2020	Soil	bulk_soil	NA	4	134188	NA	ITS1-1F†	X201SC20123127-Z01-F001	k__Fungi	p__Ascomycota	c__Sordariomycetes	o__Sordariales	f__Cephalothecaceae	Phialemonium
554	SV57	Che_Rhiz_4	0.000636899	Che_Rhiz_4	FKDN202654751-1A	NA	NA	nov_2020	Chevallier	rhizosphere	NA	3	143428	NA	ITS1-1F†	X201SC20123127-Z01-F001	k__Fungi	p__Mortierellomycota	c__Mortierellomycetes	o__Mortierellales	f__Mortierellaceae	Mortierella
213	SV182	Che_Rhiz_5	0.000597576	Che_Rhiz_5	FKDN202654752-1A	NA	NA	nov_2020	Chevallier	rhizosphere	NA	4	142946	NA	ITS1-1F†	X201SC20123127-Z01-F001	k__Fungi	p__Ascomycota	c__Sordariomycetes	o__Hypocreales	f__Nectriaceae	Gibberella
676	SV83	Che_Roots_4	0.000591025	Che_Roots_4	FKDN202654756-1A	NA	NA	nov_2020	Chevallier	roots	NA	3	168529	NA	ITS1-1F†	X201SC20123127-Z01-F001	k__Fungi	p__Basidiomycota	c__Tremellomycetes	o__Trichosporonales	f__Trichosporonaceae	Cutaneotrichosporon
278	SV26	Che_Roots_3	0.000590655	Che_Roots_3	FKDN202654755-1A	NA	NA	nov_2020	Chevallier	roots	NA	2	153822	NA	ITS1-1F†	X201SC20123127-Z01-F001	k__Fungi	p__Ascomycota	c__Leotiomycetes	o__Helotiales	f__Helotiaceae	Meliniomyces
638	SV70	Soil_2	0.000584222	Soil_2	FKDN202654735-1A	NA	NA	nov_2020	Soil	bulk_soil	NA	2	139968	NA	ITS1-1F†	X201SC20123127-Z01-F001	k__Fungi	p__Ascomycota	c__Eurotiomycetes	o__Eurotiales	f__Trichocomaceae	Talaromyces
258	SV20	Che_Roots_5	0.000580733	Che_Roots_5	FKDN202654757-1A	NA	NA	nov_2020	Chevallier	roots	NA	4	153857	NA	ITS1-1F†	X201SC20123127-Z01-F001	k__Fungi	p__Ascomycota	c__Leotiomycetes	o__Helotiales	f__Myxotrichaceae	Oidiodendron
598	SV59	Che_Roots_6	0.000580261	Che_Roots_6	FKDN202654758-1A	NA	NA	nov_2020	Chevallier	roots	NA	5	159052	NA	ITS1-1F†	X201SC20123127-Z01-F001	k__Fungi	p__Ascomycota	c__Saccharomycetes	o__Saccharomycetales	f__Trichomonascaceae	Blastobotrys
447	SV49	Ti_Roots_2	0.000573478	Ti_Roots_2	FKDN202654745-1A	NA	NA	nov_2020	Tipple	roots	NA	2	166122	NA	ITS1-1F†	X201SC20123127-Z01-F001	k__Fungi	p__Basidiomycota	c__Tremellomycetes	o__Filobasidiales	f__Piskurozymaceae	Solicoccozyma
157	SV15	Che_Roots_3	0.000568778	Che_Roots_3	FKDN202654755-1A	NA	NA	nov_2020	Chevallier	roots	NA	2	153822	NA	ITS1-1F†	X201SC20123127-Z01-F001	k__Fungi	p__Basidiomycota	c__Agaricomycetes	o__Auriculariales	f__Exidiaceae	Basidiodendron
669	SV73	Ti_Rhiz_5	0.000561676	Ti_Rhiz_5	FKDN202654742-1A	NA	NA	nov_2020	Tipple	rhizosphere	NA	4	137928	NA	ITS1-1F†	X201SC20123127-Z01-F001	k__Fungi	p__Basidiomycota	c__Agaricomycetes	o__Agaricales	f__Strophariaceae	Galerina
372	SV42	Ti_Roots_4	0.000548989	Ti_Roots_4	FKDN202654746-1A	NA	NA	nov_2020	Tipple	roots	NA	3	151349	NA	ITS1-1F†	X201SC20123127-Z01-F001	k__Fungi	p__Ascomycota	c__Sordariomycetes	o__Phomatosporales	f__Phomatosporaceae	Phomatospora
104	SV125	Che_Roots_4	0.000548809	Che_Roots_4	FKDN202654756-1A	NA	NA	nov_2020	Chevallier	roots	NA	3	168529	NA	ITS1-1F†	X201SC20123127-Z01-F001	k__Fungi	p__Ascomycota	c__Leotiomycetes	o__Helotiales	f__Hyaloscyphaceae	Hyaloscypha
621	SV64	Ti_Rhiz_6	0.000546552	Ti_Rhiz_6	FKDN202654743-1A	NA	NA	nov_2020	Tipple	rhizosphere	NA	5	163472	NA	ITS1-1F†	X201SC20123127-Z01-F001	k__Fungi	p__Ascomycota	c__Sordariomycetes	o__Sordariales	f__Cephalothecaceae	Phialemonium
644	SV70	Ti_Rhiz_1	0.000542967	Ti_Rhiz_1	FKDN202654739-1A	NA	NA	nov_2020	Tipple	rhizosphere	NA	1	140148	NA	ITS1-1F†	X201SC20123127-Z01-F001	k__Fungi	p__Ascomycota	c__Eurotiomycetes	o__Eurotiales	f__Trichocomaceae	Talaromyces
540	SV54	Che_Roots_5	0.000537178	Che_Roots_5	FKDN202654757-1A	NA	NA	nov_2020	Chevallier	roots	NA	4	153857	NA	ITS1-1F†	X201SC20123127-Z01-F001	k__Fungi	p__Ascomycota	c__Archaeorhizomycetes	o__Archaeorhizomycetales	f__Archaeorhizomycetaceae	Archaeorhizomyces
535	SV54	Ti_Rhiz_5	0.000535753	Ti_Rhiz_5	FKDN202654742-1A	NA	NA	nov_2020	Tipple	rhizosphere	NA	4	137928	NA	ITS1-1F†	X201SC20123127-Z01-F001	k__Fungi	p__Ascomycota	c__Archaeorhizomycetes	o__Archaeorhizomycetales	f__Archaeorhizomycetaceae	Archaeorhizomyces
151	SV15	Che_Rhiz_6	0.000524737	Che_Rhiz_6	FKDN202654753-1A	NA	NA	nov_2020	Chevallier	rhizosphere	NA	5	152328	NA	ITS1-1F†	X201SC20123127-Z01-F001	k__Fungi	p__Basidiomycota	c__Agaricomycetes	o__Auriculariales	f__Exidiaceae	Basidiodendron
254	SV20	Che_Rhiz_4	0.000523167	Che_Rhiz_4	FKDN202654751-1A	NA	NA	nov_2020	Chevallier	rhizosphere	NA	3	143428	NA	ITS1-1F†	X201SC20123127-Z01-F001	k__Fungi	p__Ascomycota	c__Leotiomycetes	o__Helotiales	f__Myxotrichaceae	Oidiodendron
46	SV100	Soil_5	0.00051759	Soil_5	FKDN202654738-1A	NA	NA	nov_2020	Soil	bulk_soil	NA	5	160871	NA	ITS1-1F†	X201SC20123127-Z01-F001	k__Fungi	p__Basidiomycota	c__Microbotryomycetes	o__Microbotryales	f__Ustilentylomataceae	Bauerago
201	SV182	Ti_Rhiz_2	0.000516146	Ti_Rhiz_2	FKDN202654740-1A	NA	NA	nov_2020	Tipple	rhizosphere	NA	2	145607	NA	ITS1-1F†	X201SC20123127-Z01-F001	k__Fungi	p__Ascomycota	c__Sordariomycetes	o__Hypocreales	f__Nectriaceae	Gibberella
400	SV43	Ti_Roots_1	0.000513934	Ti_Roots_1	FKDN202654744-1A	NA	NA	nov_2020	Tipple	roots	NA	1	138221	NA	ITS1-1F†	X201SC20123127-Z01-F001	k__Fungi	p__Ascomycota	c__Sordariomycetes	o__Hypocreales	f__Hypocreales_fam_Incertae_sedis	Acremonium
453	SV5	Che_Rhiz_6	0.000503464	Che_Rhiz_6	FKDN202654753-1A	NA	NA	nov_2020	Chevallier	rhizosphere	NA	5	152328	NA	ITS1-1F†	X201SC20123127-Z01-F001	k__Fungi	p__Ascomycota	c__Sordariomycetes	o__Sordariales	f__Lasiosphaeriaceae	Fimetariella
267	SV20	Ti_Roots_5	0.000498665	Ti_Roots_5	FKDN202654747-1A	NA	NA	nov_2020	Tipple	roots	NA	4	147810	NA	ITS1-1F†	X201SC20123127-Z01-F001	k__Fungi	p__Ascomycota	c__Leotiomycetes	o__Helotiales	f__Myxotrichaceae	Oidiodendron
502	SV51	Che_Roots_6	0.000493222	Che_Roots_6	FKDN202654758-1A	NA	NA	nov_2020	Chevallier	roots	NA	5	159052	NA	ITS1-1F†	X201SC20123127-Z01-F001	k__Fungi	p__Ascomycota	c__Eurotiomycetes	o__Eurotiales	f__Trichocomaceae	Rasamsonia
30	SV100	Che_Rhiz_5	0.000492122	Che_Rhiz_5	FKDN202654752-1A	NA	NA	nov_2020	Chevallier	rhizosphere	NA	4	142946	NA	ITS1-1F†	X201SC20123127-Z01-F001	k__Fungi	p__Basidiomycota	c__Microbotryomycetes	o__Microbotryales	f__Ustilentylomataceae	Bauerago
570	SV57	Che_Roots_2	0.000481897	Che_Roots_2	FKDN202654754-1A	NA	NA	nov_2020	Chevallier	roots	NA	1	169149	NA	ITS1-1F†	X201SC20123127-Z01-F001	k__Fungi	p__Mortierellomycota	c__Mortierellomycetes	o__Mortierellales	f__Mortierellaceae	Mortierella
282	SV26	Che_Rhiz_4	0.000477674	Che_Rhiz_4	FKDN202654751-1A	NA	NA	nov_2020	Chevallier	rhizosphere	NA	3	143428	NA	ITS1-1F†	X201SC20123127-Z01-F001	k__Fungi	p__Ascomycota	c__Leotiomycetes	o__Helotiales	f__Helotiaceae	Meliniomyces
316	SV27	Ti_Roots_2	0.000474602	Ti_Roots_2	FKDN202654745-1A	NA	NA	nov_2020	Tipple	roots	NA	2	166122	NA	ITS1-1F†	X201SC20123127-Z01-F001	k__Fungi	p__Ascomycota	c__Leotiomycetes	o__Helotiales	f__Helotiales_fam_Incertae_sedis	Leptodontidium
538	SV54	Ti_Rhiz_1	0.000470571	Ti_Rhiz_1	FKDN202654739-1A	NA	NA	nov_2020	Tipple	rhizosphere	NA	1	140148	NA	ITS1-1F†	X201SC20123127-Z01-F001	k__Fungi	p__Ascomycota	c__Archaeorhizomycetes	o__Archaeorhizomycetales	f__Archaeorhizomycetaceae	Archaeorhizomyces
156	SV15	Che_Rhiz_4	0.000470092	Che_Rhiz_4	FKDN202654751-1A	NA	NA	nov_2020	Chevallier	rhizosphere	NA	3	143428	NA	ITS1-1F†	X201SC20123127-Z01-F001	k__Fungi	p__Basidiomycota	c__Agaricomycetes	o__Auriculariales	f__Exidiaceae	Basidiodendron
122	SV125	Ti_Rhiz_5	0.000466623	Ti_Rhiz_5	FKDN202654742-1A	NA	NA	nov_2020	Tipple	rhizosphere	NA	4	137928	NA	ITS1-1F†	X201SC20123127-Z01-F001	k__Fungi	p__Ascomycota	c__Leotiomycetes	o__Helotiales	f__Hyaloscyphaceae	Hyaloscypha
550	SV54	Ti_Roots_6	0.000464741	Ti_Roots_6	FKDN202654748-1A	NA	NA	nov_2020	Tipple	roots	NA	5	132836	NA	ITS1-1F†	X201SC20123127-Z01-F001	k__Fungi	p__Ascomycota	c__Archaeorhizomycetes	o__Archaeorhizomycetales	f__Archaeorhizomycetaceae	Archaeorhizomyces
211	SV182	Ti_Roots_1	0.000464199	Ti_Roots_1	FKDN202654744-1A	NA	NA	nov_2020	Tipple	roots	NA	1	138221	NA	ITS1-1F†	X201SC20123127-Z01-F001	k__Fungi	p__Ascomycota	c__Sordariomycetes	o__Hypocreales	f__Nectriaceae	Gibberella
439	SV49	Che_Roots_6	0.000456956	Che_Roots_6	FKDN202654758-1A	NA	NA	nov_2020	Chevallier	roots	NA	5	159052	NA	ITS1-1F†	X201SC20123127-Z01-F001	k__Fungi	p__Basidiomycota	c__Tremellomycetes	o__Filobasidiales	f__Piskurozymaceae	Solicoccozyma
750	SV93	Ti_Roots_1	0.000455909	Ti_Roots_1	FKDN202654744-1A	NA	NA	nov_2020	Tipple	roots	NA	1	138221	NA	ITS1-1F†	X201SC20123127-Z01-F001	k__Fungi	p__Basidiomycota	c__Agaricomycetes	o__Cantharellales	f__Cantharellales_fam_Incertae_sedis	Sistotrema
629	SV70	Ti_Rhiz_5	0.000449341	Ti_Rhiz_5	FKDN202654742-1A	NA	NA	nov_2020	Tipple	rhizosphere	NA	4	137928	NA	ITS1-1F†	X201SC20123127-Z01-F001	k__Fungi	p__Ascomycota	c__Eurotiomycetes	o__Eurotiales	f__Trichocomaceae	Talaromyces
513	SV51	Ti_Roots_4	0.000435962	Ti_Roots_4	FKDN202654746-1A	NA	NA	nov_2020	Tipple	roots	NA	3	151349	NA	ITS1-1F†	X201SC20123127-Z01-F001	k__Fungi	p__Ascomycota	c__Eurotiomycetes	o__Eurotiales	f__Trichocomaceae	Rasamsonia
286	SV26	Che_Roots_5	0.00043555	Che_Roots_5	FKDN202654757-1A	NA	NA	nov_2020	Chevallier	roots	NA	4	153857	NA	ITS1-1F†	X201SC20123127-Z01-F001	k__Fungi	p__Ascomycota	c__Leotiomycetes	o__Helotiales	f__Helotiaceae	Meliniomyces
45	SV100	Ti_Rhiz_1	0.000434373	Ti_Rhiz_1	FKDN202654739-1A	NA	NA	nov_2020	Tipple	rhizosphere	NA	1	140148	NA	ITS1-1F†	X201SC20123127-Z01-F001	k__Fungi	p__Basidiomycota	c__Microbotryomycetes	o__Microbotryales	f__Ustilentylomataceae	Bauerago
418	SV48	Ti_Roots_4	0.000419815	Ti_Roots_4	FKDN202654746-1A	NA	NA	nov_2020	Tipple	roots	NA	3	151349	NA	ITS1-1F†	X201SC20123127-Z01-F001	k__Fungi	p__Ascomycota	c__Sordariomycetes	o__Sordariales	f__Chaetomiaceae	Chaetomium
537	SV54	Ti_Rhiz_2	0.000412917	Ti_Rhiz_2	FKDN202654740-1A	NA	NA	nov_2020	Tipple	rhizosphere	NA	2	145607	NA	ITS1-1F†	X201SC20123127-Z01-F001	k__Fungi	p__Ascomycota	c__Archaeorhizomycetes	o__Archaeorhizomycetales	f__Archaeorhizomycetaceae	Archaeorhizomyces
608	SV64	Che_Roots_6	0.000406183	Che_Roots_6	FKDN202654758-1A	NA	NA	nov_2020	Chevallier	roots	NA	5	159052	NA	ITS1-1F†	X201SC20123127-Z01-F001	k__Fungi	p__Ascomycota	c__Sordariomycetes	o__Sordariales	f__Cephalothecaceae	Phialemonium
257	SV20	Che_Roots_6	0.000398929	Che_Roots_6	FKDN202654758-1A	NA	NA	nov_2020	Chevallier	roots	NA	5	159052	NA	ITS1-1F†	X201SC20123127-Z01-F001	k__Fungi	p__Ascomycota	c__Leotiomycetes	o__Helotiales	f__Myxotrichaceae	Oidiodendron
643	SV70	Ti_Rhiz_2	0.000394148	Ti_Rhiz_2	FKDN202654740-1A	NA	NA	nov_2020	Tipple	rhizosphere	NA	2	145607	NA	ITS1-1F†	X201SC20123127-Z01-F001	k__Fungi	p__Ascomycota	c__Eurotiomycetes	o__Eurotiales	f__Trichocomaceae	Talaromyces
94	SV120	Ti_Roots_6	0.000383207	Ti_Roots_6	FKDN202654748-1A	NA	NA	nov_2020	Tipple	roots	NA	5	132836	NA	ITS1-1F†	X201SC20123127-Z01-F001	k__Fungi	p__Ascomycota	c__Sordariomycetes	o__Hypocreales	f__Nectriaceae	Ilyonectria
597	SV59	Ti_Roots_4	0.000379448	Ti_Roots_4	FKDN202654746-1A	NA	NA	nov_2020	Tipple	roots	NA	3	151349	NA	ITS1-1F†	X201SC20123127-Z01-F001	k__Fungi	p__Ascomycota	c__Saccharomycetes	o__Saccharomycetales	f__Trichomonascaceae	Blastobotrys
320	SV27	Che_Roots_3	0.000379186	Che_Roots_3	FKDN202654755-1A	NA	NA	nov_2020	Chevallier	roots	NA	2	153822	NA	ITS1-1F†	X201SC20123127-Z01-F001	k__Fungi	p__Ascomycota	c__Leotiomycetes	o__Helotiales	f__Helotiales_fam_Incertae_sedis	Leptodontidium
521	SV51	Che_Roots_4	0.000365873	Che_Roots_4	FKDN202654756-1A	NA	NA	nov_2020	Chevallier	roots	NA	3	168529	NA	ITS1-1F†	X201SC20123127-Z01-F001	k__Fungi	p__Ascomycota	c__Eurotiomycetes	o__Eurotiales	f__Trichocomaceae	Rasamsonia
534	SV54	Che_Roots_2	0.000353391	Che_Roots_2	FKDN202654754-1A	NA	NA	nov_2020	Chevallier	roots	NA	1	169149	NA	ITS1-1F†	X201SC20123127-Z01-F001	k__Fungi	p__Ascomycota	c__Archaeorhizomycetes	o__Archaeorhizomycetales	f__Archaeorhizomycetaceae	Archaeorhizomyces
40	SV100	Ti_Rhiz_2	0.000347225	Ti_Rhiz_2	FKDN202654740-1A	NA	NA	nov_2020	Tipple	rhizosphere	NA	2	145607	NA	ITS1-1F†	X201SC20123127-Z01-F001	k__Fungi	p__Basidiomycota	c__Microbotryomycetes	o__Microbotryales	f__Ustilentylomataceae	Bauerago
318	SV27	Ti_Roots_5	0.000344666	Ti_Roots_5	FKDN202654747-1A	NA	NA	nov_2020	Tipple	roots	NA	4	147810	NA	ITS1-1F†	X201SC20123127-Z01-F001	k__Fungi	p__Ascomycota	c__Leotiomycetes	o__Helotiales	f__Helotiales_fam_Incertae_sedis	Leptodontidium
600	SV59	Ti_Roots_2	0.000342768	Ti_Roots_2	FKDN202654745-1A	NA	NA	nov_2020	Tipple	roots	NA	2	166122	NA	ITS1-1F†	X201SC20123127-Z01-F001	k__Fungi	p__Ascomycota	c__Saccharomycetes	o__Saccharomycetales	f__Trichomonascaceae	Blastobotrys
721	SV9	Ti_Roots_2	0.000342768	Ti_Roots_2	FKDN202654745-1A	NA	NA	nov_2020	Tipple	roots	NA	2	166122	NA	ITS1-1F†	X201SC20123127-Z01-F001	k__Fungi	p__Ascomycota	c__Sordariomycetes	o__Hypocreales	f__Hypocreaceae	Trichoderma
614	SV64	Che_Roots_4	0.000337728	Che_Roots_4	FKDN202654756-1A	NA	NA	nov_2020	Chevallier	roots	NA	3	168529	NA	ITS1-1F†	X201SC20123127-Z01-F001	k__Fungi	p__Ascomycota	c__Sordariomycetes	o__Sordariales	f__Cephalothecaceae	Phialemonium
354	SV42	Ti_Rhiz_5	0.000337006	Ti_Rhiz_5	FKDN202654742-1A	NA	NA	nov_2020	Tipple	rhizosphere	NA	4	137928	NA	ITS1-1F†	X201SC20123127-Z01-F001	k__Fungi	p__Ascomycota	c__Sordariomycetes	o__Phomatosporales	f__Phomatosporaceae	Phomatospora
603	SV64	Ti_Rhiz_1	0.00033483	Ti_Rhiz_1	FKDN202654739-1A	NA	NA	nov_2020	Tipple	rhizosphere	NA	1	140148	NA	ITS1-1F†	X201SC20123127-Z01-F001	k__Fungi	p__Ascomycota	c__Sordariomycetes	o__Sordariales	f__Cephalothecaceae	Phialemonium
109	SV125	Che_Rhiz_5	0.00033394	Che_Rhiz_5	FKDN202654752-1A	NA	NA	nov_2020	Chevallier	rhizosphere	NA	4	142946	NA	ITS1-1F†	X201SC20123127-Z01-F001	k__Fungi	p__Ascomycota	c__Leotiomycetes	o__Helotiales	f__Hyaloscyphaceae	Hyaloscypha
264	SV20	Ti_Roots_4	0.000331008	Ti_Roots_4	FKDN202654746-1A	NA	NA	nov_2020	Tipple	roots	NA	3	151349	NA	ITS1-1F†	X201SC20123127-Z01-F001	k__Fungi	p__Ascomycota	c__Leotiomycetes	o__Helotiales	f__Myxotrichaceae	Oidiodendron
51	SV12	Che_Rhiz_6	0.000326188	Che_Rhiz_6	FKDN202654753-1A	NA	NA	nov_2020	Chevallier	rhizosphere	NA	5	152328	NA	ITS1-1F†	X201SC20123127-Z01-F001	k__Fungi	p__Ascomycota	c__Eurotiomycetes	o__Eurotiales	f__Aspergillaceae	Penicillium
510	SV51	Ti_Roots_2	0.000322993	Ti_Roots_2	FKDN202654745-1A	NA	NA	nov_2020	Tipple	roots	NA	2	166122	NA	ITS1-1F†	X201SC20123127-Z01-F001	k__Fungi	p__Ascomycota	c__Eurotiomycetes	o__Eurotiales	f__Trichocomaceae	Rasamsonia
173	SV15	Ti_Roots_5	0.000322666	Ti_Roots_5	FKDN202654747-1A	NA	NA	nov_2020	Tipple	roots	NA	4	147810	NA	ITS1-1F†	X201SC20123127-Z01-F001	k__Fungi	p__Basidiomycota	c__Agaricomycetes	o__Auriculariales	f__Exidiaceae	Basidiodendron
667	SV73	Ti_Rhiz_6	0.000318822	Ti_Rhiz_6	FKDN202654743-1A	NA	NA	nov_2020	Tipple	rhizosphere	NA	5	163472	NA	ITS1-1F†	X201SC20123127-Z01-F001	k__Fungi	p__Basidiomycota	c__Agaricomycetes	o__Agaricales	f__Strophariaceae	Galerina
98	SV120	Ti_Roots_1	0.000314992	Ti_Roots_1	FKDN202654744-1A	NA	NA	nov_2020	Tipple	roots	NA	1	138221	NA	ITS1-1F†	X201SC20123127-Z01-F001	k__Fungi	p__Ascomycota	c__Sordariomycetes	o__Hypocreales	f__Nectriaceae	Ilyonectria
649	SV70	Soil_3	0.000314835	Soil_3	FKDN202654736-1A	NA	NA	nov_2020	Soil	bulk_soil	NA	3	158868	NA	ITS1-1F†	X201SC20123127-Z01-F001	k__Fungi	p__Ascomycota	c__Eurotiomycetes	o__Eurotiales	f__Trichocomaceae	Talaromyces
512	SV51	Ti_Roots_5	0.000307999	Ti_Roots_5	FKDN202654747-1A	NA	NA	nov_2020	Tipple	roots	NA	4	147810	NA	ITS1-1F†	X201SC20123127-Z01-F001	k__Fungi	p__Ascomycota	c__Eurotiomycetes	o__Eurotiales	f__Trichocomaceae	Rasamsonia
120	SV125	Ti_Roots_1	0.000306703	Ti_Roots_1	FKDN202654744-1A	NA	NA	nov_2020	Tipple	roots	NA	1	138221	NA	ITS1-1F†	X201SC20123127-Z01-F001	k__Fungi	p__Ascomycota	c__Leotiomycetes	o__Helotiales	f__Hyaloscyphaceae	Hyaloscypha
159	SV15	Che_Roots_2	0.000301989	Che_Roots_2	FKDN202654754-1A	NA	NA	nov_2020	Chevallier	roots	NA	1	169149	NA	ITS1-1F†	X201SC20123127-Z01-F001	k__Fungi	p__Basidiomycota	c__Agaricomycetes	o__Auriculariales	f__Exidiaceae	Basidiodendron
647	SV70	Ti_Roots_4	0.000298715	Ti_Roots_4	FKDN202654746-1A	NA	NA	nov_2020	Tipple	roots	NA	3	151349	NA	ITS1-1F†	X201SC20123127-Z01-F001	k__Fungi	p__Ascomycota	c__Eurotiomycetes	o__Eurotiales	f__Trichocomaceae	Talaromyces
93	SV120	Ti_Rhiz_6	0.000296049	Ti_Rhiz_6	FKDN202654743-1A	NA	NA	nov_2020	Tipple	rhizosphere	NA	5	163472	NA	ITS1-1F†	X201SC20123127-Z01-F001	k__Fungi	p__Ascomycota	c__Sordariomycetes	o__Hypocreales	f__Nectriaceae	Ilyonectria
518	SV51	Che_Roots_3	0.000291681	Che_Roots_3	FKDN202654755-1A	NA	NA	nov_2020	Chevallier	roots	NA	2	153822	NA	ITS1-1F†	X201SC20123127-Z01-F001	k__Fungi	p__Ascomycota	c__Eurotiomycetes	o__Eurotiales	f__Trichocomaceae	Rasamsonia
172	SV15	Ti_Roots_2	0.000290035	Ti_Roots_2	FKDN202654745-1A	NA	NA	nov_2020	Tipple	roots	NA	2	166122	NA	ITS1-1F†	X201SC20123127-Z01-F001	k__Fungi	p__Basidiomycota	c__Agaricomycetes	o__Auriculariales	f__Exidiaceae	Basidiodendron
443	SV49	Che_Roots_2	0.000289138	Che_Roots_2	FKDN202654754-1A	NA	NA	nov_2020	Chevallier	roots	NA	1	169149	NA	ITS1-1F†	X201SC20123127-Z01-F001	k__Fungi	p__Basidiomycota	c__Tremellomycetes	o__Filobasidiales	f__Piskurozymaceae	Solicoccozyma
430	SV49	Che_Rhiz_4	0.000288121	Che_Rhiz_4	FKDN202654751-1A	NA	NA	nov_2020	Chevallier	rhizosphere	NA	3	143428	NA	ITS1-1F†	X201SC20123127-Z01-F001	k__Fungi	p__Basidiomycota	c__Tremellomycetes	o__Filobasidiales	f__Piskurozymaceae	Solicoccozyma
449	SV49	Ti_Roots_4	0.000282568	Ti_Roots_4	FKDN202654746-1A	NA	NA	nov_2020	Tipple	roots	NA	3	151349	NA	ITS1-1F†	X201SC20123127-Z01-F001	k__Fungi	p__Basidiomycota	c__Tremellomycetes	o__Filobasidiales	f__Piskurozymaceae	Solicoccozyma
633	SV70	Ti_Rhiz_4	0.000280285	Ti_Rhiz_4	FKDN202654741-1A	NA	NA	nov_2020	Tipple	rhizosphere	NA	3	155460	NA	ITS1-1F†	X201SC20123127-Z01-F001	k__Fungi	p__Ascomycota	c__Eurotiomycetes	o__Eurotiales	f__Trichocomaceae	Talaromyces
437	SV49	Che_Roots_3	0.000277097	Che_Roots_3	FKDN202654755-1A	NA	NA	nov_2020	Chevallier	roots	NA	2	153822	NA	ITS1-1F†	X201SC20123127-Z01-F001	k__Fungi	p__Basidiomycota	c__Tremellomycetes	o__Filobasidiales	f__Piskurozymaceae	Solicoccozyma
111	SV125	Ti_Roots_2	0.000276851	Ti_Roots_2	FKDN202654745-1A	NA	NA	nov_2020	Tipple	roots	NA	2	166122	NA	ITS1-1F†	X201SC20123127-Z01-F001	k__Fungi	p__Ascomycota	c__Leotiomycetes	o__Helotiales	f__Hyaloscyphaceae	Hyaloscypha
549	SV54	Ti_Roots_4	0.000274495	Ti_Roots_4	FKDN202654746-1A	NA	NA	nov_2020	Tipple	roots	NA	3	151349	NA	ITS1-1F†	X201SC20123127-Z01-F001	k__Fungi	p__Ascomycota	c__Archaeorhizomycetes	o__Archaeorhizomycetales	f__Archaeorhizomycetaceae	Archaeorhizomyces
726	SV93	Che_Rhiz_5	0.000272424	Che_Rhiz_5	FKDN202654752-1A	NA	NA	nov_2020	Chevallier	rhizosphere	NA	4	142946	NA	ITS1-1F†	X201SC20123127-Z01-F001	k__Fungi	p__Basidiomycota	c__Agaricomycetes	o__Cantharellales	f__Cantharellales_fam_Incertae_sedis	Sistotrema
501	SV51	Che_Rhiz_2	0.000267357	Che_Rhiz_2	FKDN202654749-1A	NA	NA	nov_2020	Chevallier	rhizosphere	NA	1	157371	NA	ITS1-1F†	X201SC20123127-Z01-F001	k__Fungi	p__Ascomycota	c__Eurotiomycetes	o__Eurotiales	f__Trichocomaceae	Rasamsonia
389	SV43	Che_Roots_5	0.00026133	Che_Roots_5	FKDN202654757-1A	NA	NA	nov_2020	Chevallier	roots	NA	4	153857	NA	ITS1-1F†	X201SC20123127-Z01-F001	k__Fungi	p__Ascomycota	c__Sordariomycetes	o__Hypocreales	f__Hypocreales_fam_Incertae_sedis	Acremonium
662	SV73	Soil_1	0.000258075	Soil_1	FKDN202654734-1A	NA	NA	nov_2020	Soil	bulk_soil	NA	1	168870	NA	ITS1-1F†	X201SC20123127-Z01-F001	k__Fungi	p__Basidiomycota	c__Agaricomycetes	o__Agaricales	f__Strophariaceae	Galerina
298	SV26	Che_Roots_6	0.000253864	Che_Roots_6	FKDN202654758-1A	NA	NA	nov_2020	Chevallier	roots	NA	5	159052	NA	ITS1-1F†	X201SC20123127-Z01-F001	k__Fungi	p__Ascomycota	c__Leotiomycetes	o__Helotiales	f__Helotiaceae	Meliniomyces
199	SV154	Ti_Roots_4	0.000250274	Ti_Roots_4	FKDN202654746-1A	NA	NA	nov_2020	Tipple	roots	NA	3	151349	NA	ITS1-1F†	X201SC20123127-Z01-F001	k__Fungi	p__Ascomycota	c__Sordariomycetes	o__Hypocreales	f__Nectriaceae	Fusarium
707	SV9	Che_Rhiz_4	0.00025021	Che_Rhiz_4	FKDN202654751-1A	NA	NA	nov_2020	Chevallier	rhizosphere	NA	3	143428	NA	ITS1-1F†	X201SC20123127-Z01-F001	k__Fungi	p__Ascomycota	c__Sordariomycetes	o__Hypocreales	f__Hypocreaceae	Trichoderma
595	SV59	Ti_Roots_5	0.000249333	Ti_Roots_5	FKDN202654747-1A	NA	NA	nov_2020	Tipple	roots	NA	4	147810	NA	ITS1-1F†	X201SC20123127-Z01-F001	k__Fungi	p__Ascomycota	c__Saccharomycetes	o__Saccharomycetales	f__Trichomonascaceae	Blastobotrys
174	SV15	Ti_Roots_4	0.000242201	Ti_Roots_4	FKDN202654746-1A	NA	NA	nov_2020	Tipple	roots	NA	3	151349	NA	ITS1-1F†	X201SC20123127-Z01-F001	k__Fungi	p__Basidiomycota	c__Agaricomycetes	o__Auriculariales	f__Exidiaceae	Basidiodendron
100	SV120	Ti_Rhiz_4	0.000240244	Ti_Rhiz_4	FKDN202654741-1A	NA	NA	nov_2020	Tipple	rhizosphere	NA	3	155460	NA	ITS1-1F†	X201SC20123127-Z01-F001	k__Fungi	p__Ascomycota	c__Sordariomycetes	o__Hypocreales	f__Nectriaceae	Ilyonectria
176	SV154	Ti_Rhiz_1	0.000235286	Ti_Rhiz_1	FKDN202654739-1A	NA	NA	nov_2020	Tipple	rhizosphere	NA	1	140148	NA	ITS1-1F†	X201SC20123127-Z01-F001	k__Fungi	p__Ascomycota	c__Sordariomycetes	o__Hypocreales	f__Nectriaceae	Fusarium
112	SV125	Soil_5	0.00023375	Soil_5	FKDN202654738-1A	NA	NA	nov_2020	Soil	bulk_soil	NA	5	160871	NA	ITS1-1F†	X201SC20123127-Z01-F001	k__Fungi	p__Ascomycota	c__Leotiomycetes	o__Helotiales	f__Hyaloscyphaceae	Hyaloscypha
187	SV154	Ti_Rhiz_4	0.000232236	Ti_Rhiz_4	FKDN202654741-1A	NA	NA	nov_2020	Tipple	rhizosphere	NA	3	155460	NA	ITS1-1F†	X201SC20123127-Z01-F001	k__Fungi	p__Ascomycota	c__Sordariomycetes	o__Hypocreales	f__Nectriaceae	Fusarium
717	SV9	Che_Roots_3	0.000226053	Che_Roots_3	FKDN202654755-1A	NA	NA	nov_2020	Chevallier	roots	NA	2	153822	NA	ITS1-1F†	X201SC20123127-Z01-F001	k__Fungi	p__Ascomycota	c__Sordariomycetes	o__Hypocreales	f__Hypocreaceae	Trichoderma
642	SV70	Soil_4	0.000225557	Soil_4	FKDN202654737-1A	NA	NA	nov_2020	Soil	bulk_soil	NA	4	134188	NA	ITS1-1F†	X201SC20123127-Z01-F001	k__Fungi	p__Ascomycota	c__Eurotiomycetes	o__Eurotiales	f__Trichocomaceae	Talaromyces
83	SV120	Ti_Rhiz_2	0.000225227	Ti_Rhiz_2	FKDN202654740-1A	NA	NA	nov_2020	Tipple	rhizosphere	NA	2	145607	NA	ITS1-1F†	X201SC20123127-Z01-F001	k__Fungi	p__Ascomycota	c__Sordariomycetes	o__Hypocreales	f__Nectriaceae	Ilyonectria
732	SV93	Ti_Rhiz_2	0.000225227	Ti_Rhiz_2	FKDN202654740-1A	NA	NA	nov_2020	Tipple	rhizosphere	NA	2	145607	NA	ITS1-1F†	X201SC20123127-Z01-F001	k__Fungi	p__Basidiomycota	c__Agaricomycetes	o__Cantharellales	f__Cantharellales_fam_Incertae_sedis	Sistotrema
396	SV43	Ti_Roots_2	0.000224118	Ti_Roots_2	FKDN202654745-1A	NA	NA	nov_2020	Tipple	roots	NA	2	166122	NA	ITS1-1F†	X201SC20123127-Z01-F001	k__Fungi	p__Ascomycota	c__Sordariomycetes	o__Hypocreales	f__Hypocreales_fam_Incertae_sedis	Acremonium
636	SV70	Che_Rhiz_5	0.000219697	Che_Rhiz_5	FKDN202654752-1A	NA	NA	nov_2020	Chevallier	rhizosphere	NA	4	142946	NA	ITS1-1F†	X201SC20123127-Z01-F001	k__Fungi	p__Ascomycota	c__Eurotiomycetes	o__Eurotiales	f__Trichocomaceae	Talaromyces
77	SV120	Che_Roots_3	0.000218761	Che_Roots_3	FKDN202654755-1A	NA	NA	nov_2020	Chevallier	roots	NA	2	153822	NA	ITS1-1F†	X201SC20123127-Z01-F001	k__Fungi	p__Ascomycota	c__Sordariomycetes	o__Hypocreales	f__Nectriaceae	Ilyonectria
576	SV59	Che_Roots_4	0.000218116	Che_Roots_4	FKDN202654756-1A	NA	NA	nov_2020	Chevallier	roots	NA	3	168529	NA	ITS1-1F†	X201SC20123127-Z01-F001	k__Fungi	p__Ascomycota	c__Saccharomycetes	o__Saccharomycetales	f__Trichomonascaceae	Blastobotrys
119	SV125	Che_Roots_5	0.000217775	Che_Roots_5	FKDN202654757-1A	NA	NA	nov_2020	Chevallier	roots	NA	4	153857	NA	ITS1-1F†	X201SC20123127-Z01-F001	k__Fungi	p__Ascomycota	c__Leotiomycetes	o__Helotiales	f__Hyaloscyphaceae	Hyaloscypha
616	SV64	Ti_Roots_2	0.000217526	Ti_Roots_2	FKDN202654745-1A	NA	NA	nov_2020	Tipple	roots	NA	2	166122	NA	ITS1-1F†	X201SC20123127-Z01-F001	k__Fungi	p__Ascomycota	c__Sordariomycetes	o__Sordariales	f__Cephalothecaceae	Phialemonium
179	SV154	Soil_3	0.000212726	Soil_3	FKDN202654736-1A	NA	NA	nov_2020	Soil	bulk_soil	NA	3	158868	NA	ITS1-1F†	X201SC20123127-Z01-F001	k__Fungi	p__Ascomycota	c__Sordariomycetes	o__Hypocreales	f__Nectriaceae	Fusarium
33	SV100	Che_Roots_5	0.000210516	Che_Roots_5	FKDN202654757-1A	NA	NA	nov_2020	Chevallier	roots	NA	4	153857	NA	ITS1-1F†	X201SC20123127-Z01-F001	k__Fungi	p__Basidiomycota	c__Microbotryomycetes	o__Microbotryales	f__Ustilentylomataceae	Bauerago
388	SV43	Che_Roots_6	0.000210345	Che_Roots_6	FKDN202654758-1A	NA	NA	nov_2020	Chevallier	roots	NA	5	159052	NA	ITS1-1F†	X201SC20123127-Z01-F001	k__Fungi	p__Ascomycota	c__Sordariomycetes	o__Hypocreales	f__Hypocreales_fam_Incertae_sedis	Acremonium
88	SV120	Ti_Rhiz_1	0.000208137	Ti_Rhiz_1	FKDN202654739-1A	NA	NA	nov_2020	Tipple	rhizosphere	NA	1	140148	NA	ITS1-1F†	X201SC20123127-Z01-F001	k__Fungi	p__Ascomycota	c__Sordariomycetes	o__Hypocreales	f__Nectriaceae	Ilyonectria
578	SV59	Che_Roots_3	0.000204177	Che_Roots_3	FKDN202654755-1A	NA	NA	nov_2020	Chevallier	roots	NA	2	153822	NA	ITS1-1F†	X201SC20123127-Z01-F001	k__Fungi	p__Ascomycota	c__Saccharomycetes	o__Saccharomycetales	f__Trichomonascaceae	Blastobotrys
740	SV93	Ti_Rhiz_5	0.000198747	Ti_Rhiz_5	FKDN202654742-1A	NA	NA	nov_2020	Tipple	rhizosphere	NA	4	137928	NA	ITS1-1F†	X201SC20123127-Z01-F001	k__Fungi	p__Basidiomycota	c__Agaricomycetes	o__Cantharellales	f__Cantharellales_fam_Incertae_sedis	Sistotrema
200	SV154	Ti_Roots_2	0.000191159	Ti_Roots_2	FKDN202654745-1A	NA	NA	nov_2020	Tipple	roots	NA	2	166122	NA	ITS1-1F†	X201SC20123127-Z01-F001	k__Fungi	p__Ascomycota	c__Sordariomycetes	o__Hypocreales	f__Nectriaceae	Fusarium
543	SV54	Ti_Roots_1	0.000190653	Ti_Roots_1	FKDN202654744-1A	NA	NA	nov_2020	Tipple	roots	NA	1	138221	NA	ITS1-1F†	X201SC20123127-Z01-F001	k__Fungi	p__Ascomycota	c__Archaeorhizomycetes	o__Archaeorhizomycetales	f__Archaeorhizomycetaceae	Archaeorhizomyces
34	SV100	Ti_Rhiz_5	0.000190106	Ti_Rhiz_5	FKDN202654742-1A	NA	NA	nov_2020	Tipple	rhizosphere	NA	4	137928	NA	ITS1-1F†	X201SC20123127-Z01-F001	k__Fungi	p__Basidiomycota	c__Microbotryomycetes	o__Microbotryales	f__Ustilentylomataceae	Bauerago
508	SV51	Che_Rhiz_4	0.000189553	Che_Rhiz_4	FKDN202654751-1A	NA	NA	nov_2020	Chevallier	rhizosphere	NA	3	143428	NA	ITS1-1F†	X201SC20123127-Z01-F001	k__Fungi	p__Ascomycota	c__Eurotiomycetes	o__Eurotiales	f__Trichocomaceae	Rasamsonia
110	SV125	Che_Roots_6	0.000188585	Che_Roots_6	FKDN202654758-1A	NA	NA	nov_2020	Chevallier	roots	NA	5	159052	NA	ITS1-1F†	X201SC20123127-Z01-F001	k__Fungi	p__Ascomycota	c__Leotiomycetes	o__Helotiales	f__Hyaloscyphaceae	Hyaloscypha
73	SV12	Ti_Roots_6	0.000187527	Ti_Roots_6	FKDN202654748-1A	NA	NA	nov_2020	Tipple	roots	NA	5	132836	NA	ITS1-1F†	X201SC20123127-Z01-F001	k__Fungi	p__Ascomycota	c__Eurotiomycetes	o__Eurotiales	f__Aspergillaceae	Penicillium
714	SV9	Che_Roots_2	0.000186333	Che_Roots_2	FKDN202654754-1A	NA	NA	nov_2020	Chevallier	roots	NA	1	169149	NA	ITS1-1F†	X201SC20123127-Z01-F001	k__Fungi	p__Ascomycota	c__Sordariomycetes	o__Hypocreales	f__Hypocreaceae	Trichoderma
319	SV27	Ti_Roots_4	0.000177614	Ti_Roots_4	FKDN202654746-1A	NA	NA	nov_2020	Tipple	roots	NA	3	151349	NA	ITS1-1F†	X201SC20123127-Z01-F001	k__Fungi	p__Ascomycota	c__Leotiomycetes	o__Helotiales	f__Helotiales_fam_Incertae_sedis	Leptodontidium
401	SV48	Che_Roots_4	0.0001759	Che_Roots_4	FKDN202654756-1A	NA	NA	nov_2020	Chevallier	roots	NA	3	168529	NA	ITS1-1F†	X201SC20123127-Z01-F001	k__Fungi	p__Ascomycota	c__Sordariomycetes	o__Sordariales	f__Chaetomiaceae	Chaetomium
182	SV154	Soil_5	0.000175313	Soil_5	FKDN202654738-1A	NA	NA	nov_2020	Soil	bulk_soil	NA	5	160871	NA	ITS1-1F†	X201SC20123127-Z01-F001	k__Fungi	p__Ascomycota	c__Sordariomycetes	o__Hypocreales	f__Nectriaceae	Fusarium
403	SV48	Che_Roots_5	0.00017422	Che_Roots_5	FKDN202654757-1A	NA	NA	nov_2020	Chevallier	roots	NA	4	153857	NA	ITS1-1F†	X201SC20123127-Z01-F001	k__Fungi	p__Ascomycota	c__Sordariomycetes	o__Sordariales	f__Chaetomiaceae	Chaetomium
32	SV100	Ti_Roots_1	0.000174075	Ti_Roots_1	FKDN202654744-1A	NA	NA	nov_2020	Tipple	roots	NA	1	138221	NA	ITS1-1F†	X201SC20123127-Z01-F001	k__Fungi	p__Basidiomycota	c__Microbotryomycetes	o__Microbotryales	f__Ustilentylomataceae	Bauerago
270	SV20	Che_Roots_2	0.000173483	Che_Roots_2	FKDN202654754-1A	NA	NA	nov_2020	Chevallier	roots	NA	1	169149	NA	ITS1-1F†	X201SC20123127-Z01-F001	k__Fungi	p__Ascomycota	c__Leotiomycetes	o__Helotiales	f__Myxotrichaceae	Oidiodendron
82	SV120	Soil_4	0.000171853	Soil_4	FKDN202654737-1A	NA	NA	nov_2020	Soil	bulk_soil	NA	4	134188	NA	ITS1-1F†	X201SC20123127-Z01-F001	k__Fungi	p__Ascomycota	c__Sordariomycetes	o__Hypocreales	f__Nectriaceae	Ilyonectria
562	SV57	Ti_Roots_6	0.00017122	Ti_Roots_6	FKDN202654748-1A	NA	NA	nov_2020	Tipple	roots	NA	5	132836	NA	ITS1-1F†	X201SC20123127-Z01-F001	k__Fungi	p__Mortierellomycota	c__Mortierellomycetes	o__Mortierellales	f__Mortierellaceae	Mortierella
631	SV70	Ti_Rhiz_6	0.000167002	Ti_Rhiz_6	FKDN202654743-1A	NA	NA	nov_2020	Tipple	rhizosphere	NA	5	163472	NA	ITS1-1F†	X201SC20123127-Z01-F001	k__Fungi	p__Ascomycota	c__Eurotiomycetes	o__Eurotiales	f__Trichocomaceae	Talaromyces
652	SV73	Che_Rhiz_4	0.000166807	Che_Rhiz_4	FKDN202654751-1A	NA	NA	nov_2020	Chevallier	rhizosphere	NA	3	143428	NA	ITS1-1F†	X201SC20123127-Z01-F001	k__Fungi	p__Basidiomycota	c__Agaricomycetes	o__Agaricales	f__Strophariaceae	Galerina
445	SV49	Ti_Roots_5	0.000161333	Ti_Roots_5	FKDN202654747-1A	NA	NA	nov_2020	Tipple	roots	NA	4	147810	NA	ITS1-1F†	X201SC20123127-Z01-F001	k__Fungi	p__Basidiomycota	c__Tremellomycetes	o__Filobasidiales	f__Piskurozymaceae	Solicoccozyma
105	SV125	Che_Roots_3	0.000160425	Che_Roots_3	FKDN202654755-1A	NA	NA	nov_2020	Chevallier	roots	NA	2	153822	NA	ITS1-1F†	X201SC20123127-Z01-F001	k__Fungi	p__Ascomycota	c__Leotiomycetes	o__Helotiales	f__Hyaloscyphaceae	Hyaloscypha
645	SV70	Soil_5	0.000158616	Soil_5	FKDN202654738-1A	NA	NA	nov_2020	Soil	bulk_soil	NA	5	160871	NA	ITS1-1F†	X201SC20123127-Z01-F001	k__Fungi	p__Ascomycota	c__Eurotiomycetes	o__Eurotiales	f__Trichocomaceae	Talaromyces
353	SV42	Che_Roots_4	0.000154792	Che_Roots_4	FKDN202654756-1A	NA	NA	nov_2020	Chevallier	roots	NA	3	168529	NA	ITS1-1F†	X201SC20123127-Z01-F001	k__Fungi	p__Ascomycota	c__Sordariomycetes	o__Phomatosporales	f__Phomatosporaceae	Phomatospora
222	SV182	Che_Roots_3	0.000153133	Che_Roots_3	FKDN202654755-1A	NA	NA	nov_2020	Chevallier	roots	NA	2	153822	NA	ITS1-1F†	X201SC20123127-Z01-F001	k__Fungi	p__Ascomycota	c__Sordariomycetes	o__Hypocreales	f__Nectriaceae	Gibberella
304	SV27	Che_Rhiz_4	0.000151643	Che_Rhiz_4	FKDN202654751-1A	NA	NA	nov_2020	Chevallier	rhizosphere	NA	3	143428	NA	ITS1-1F†	X201SC20123127-Z01-F001	k__Fungi	p__Ascomycota	c__Leotiomycetes	o__Helotiales	f__Helotiales_fam_Incertae_sedis	Leptodontidium
377	SV43	Che_Rhiz_4	0.000151643	Che_Rhiz_4	FKDN202654751-1A	NA	NA	nov_2020	Chevallier	rhizosphere	NA	3	143428	NA	ITS1-1F†	X201SC20123127-Z01-F001	k__Fungi	p__Ascomycota	c__Sordariomycetes	o__Hypocreales	f__Hypocreales_fam_Incertae_sedis	Acremonium
80	SV120	Che_Rhiz_5	0.000149394	Che_Rhiz_5	FKDN202654752-1A	NA	NA	nov_2020	Chevallier	rhizosphere	NA	4	142946	NA	ITS1-1F†	X201SC20123127-Z01-F001	k__Fungi	p__Ascomycota	c__Sordariomycetes	o__Hypocreales	f__Nectriaceae	Ilyonectria
551	SV57	Che_Rhiz_2	0.00014775	Che_Rhiz_2	FKDN202654749-1A	NA	NA	nov_2020	Chevallier	rhizosphere	NA	1	157371	NA	ITS1-1F†	X201SC20123127-Z01-F001	k__Fungi	p__Mortierellomycota	c__Mortierellomycetes	o__Mortierellales	f__Mortierellaceae	Mortierella
544	SV54	Che_Roots_6	0.000145065	Che_Roots_6	FKDN202654758-1A	NA	NA	nov_2020	Chevallier	roots	NA	5	159052	NA	ITS1-1F†	X201SC20123127-Z01-F001	k__Fungi	p__Ascomycota	c__Archaeorhizomycetes	o__Archaeorhizomycetales	f__Archaeorhizomycetaceae	Archaeorhizomyces
657	SV73	Ti_Rhiz_1	0.000144791	Ti_Rhiz_1	FKDN202654739-1A	NA	NA	nov_2020	Tipple	rhizosphere	NA	1	140148	NA	ITS1-1F†	X201SC20123127-Z01-F001	k__Fungi	p__Basidiomycota	c__Agaricomycetes	o__Agaricales	f__Strophariaceae	Galerina
266	SV20	Che_Rhiz_6	0.000141821	Che_Rhiz_6	FKDN202654753-1A	NA	NA	nov_2020	Chevallier	rhizosphere	NA	5	152328	NA	ITS1-1F†	X201SC20123127-Z01-F001	k__Fungi	p__Ascomycota	c__Leotiomycetes	o__Helotiales	f__Myxotrichaceae	Oidiodendron
429	SV49	Che_Rhiz_6	0.000141821	Che_Rhiz_6	FKDN202654753-1A	NA	NA	nov_2020	Chevallier	rhizosphere	NA	5	152328	NA	ITS1-1F†	X201SC20123127-Z01-F001	k__Fungi	p__Basidiomycota	c__Tremellomycetes	o__Filobasidiales	f__Piskurozymaceae	Solicoccozyma
580	SV59	Che_Roots_2	0.000141356	Che_Roots_2	FKDN202654754-1A	NA	NA	nov_2020	Chevallier	roots	NA	1	169149	NA	ITS1-1F†	X201SC20123127-Z01-F001	k__Fungi	p__Ascomycota	c__Saccharomycetes	o__Saccharomycetales	f__Trichomonascaceae	Blastobotrys
118	SV125	Soil_4	0.00013963	Soil_4	FKDN202654737-1A	NA	NA	nov_2020	Soil	bulk_soil	NA	4	134188	NA	ITS1-1F†	X201SC20123127-Z01-F001	k__Fungi	p__Ascomycota	c__Leotiomycetes	o__Helotiales	f__Hyaloscyphaceae	Hyaloscypha
198	SV154	Ti_Roots_6	0.000138607	Ti_Roots_6	FKDN202654748-1A	NA	NA	nov_2020	Tipple	roots	NA	5	132836	NA	ITS1-1F†	X201SC20123127-Z01-F001	k__Fungi	p__Ascomycota	c__Sordariomycetes	o__Hypocreales	f__Nectriaceae	Fusarium
391	SV43	Che_Roots_3	0.000138549	Che_Roots_3	FKDN202654755-1A	NA	NA	nov_2020	Chevallier	roots	NA	2	153822	NA	ITS1-1F†	X201SC20123127-Z01-F001	k__Fungi	p__Ascomycota	c__Sordariomycetes	o__Hypocreales	f__Hypocreales_fam_Incertae_sedis	Acremonium
739	SV93	Che_Roots_6	0.000137812	Che_Roots_6	FKDN202654758-1A	NA	NA	nov_2020	Chevallier	roots	NA	5	159052	NA	ITS1-1F†	X201SC20123127-Z01-F001	k__Fungi	p__Basidiomycota	c__Agaricomycetes	o__Cantharellales	f__Cantharellales_fam_Incertae_sedis	Sistotrema
582	SV59	Che_Rhiz_4	0.000136478	Che_Rhiz_4	FKDN202654751-1A	NA	NA	nov_2020	Chevallier	rhizosphere	NA	3	143428	NA	ITS1-1F†	X201SC20123127-Z01-F001	k__Fungi	p__Ascomycota	c__Saccharomycetes	o__Saccharomycetales	f__Trichomonascaceae	Blastobotrys
548	SV54	Ti_Roots_5	0.000132	Ti_Roots_5	FKDN202654747-1A	NA	NA	nov_2020	Tipple	roots	NA	4	147810	NA	ITS1-1F†	X201SC20123127-Z01-F001	k__Fungi	p__Ascomycota	c__Archaeorhizomycetes	o__Archaeorhizomycetales	f__Archaeorhizomycetaceae	Archaeorhizomyces
529	SV54	Ti_Rhiz_6	0.000129047	Ti_Rhiz_6	FKDN202654743-1A	NA	NA	nov_2020	Tipple	rhizosphere	NA	5	163472	NA	ITS1-1F†	X201SC20123127-Z01-F001	k__Fungi	p__Ascomycota	c__Archaeorhizomycetes	o__Archaeorhizomycetales	f__Archaeorhizomycetaceae	Archaeorhizomyces
324	SV27	Che_Roots_2	0.000128506	Che_Roots_2	FKDN202654754-1A	NA	NA	nov_2020	Chevallier	roots	NA	1	169149	NA	ITS1-1F†	X201SC20123127-Z01-F001	k__Fungi	p__Ascomycota	c__Leotiomycetes	o__Helotiales	f__Helotiales_fam_Incertae_sedis	Leptodontidium
91	SV120	Soil_3	0.000127636	Soil_3	FKDN202654736-1A	NA	NA	nov_2020	Soil	bulk_soil	NA	3	158868	NA	ITS1-1F†	X201SC20123127-Z01-F001	k__Fungi	p__Ascomycota	c__Sordariomycetes	o__Hypocreales	f__Nectriaceae	Ilyonectria
197	SV154	Ti_Roots_1	0.000124339	Ti_Roots_1	FKDN202654744-1A	NA	NA	nov_2020	Tipple	roots	NA	1	138221	NA	ITS1-1F†	X201SC20123127-Z01-F001	k__Fungi	p__Ascomycota	c__Sordariomycetes	o__Hypocreales	f__Nectriaceae	Fusarium
675	SV73	Ti_Roots_1	0.000124339	Ti_Roots_1	FKDN202654744-1A	NA	NA	nov_2020	Tipple	roots	NA	1	138221	NA	ITS1-1F†	X201SC20123127-Z01-F001	k__Fungi	p__Basidiomycota	c__Agaricomycetes	o__Agaricales	f__Strophariaceae	Galerina
357	SV42	Che_Roots_5	0.000123406	Che_Roots_5	FKDN202654757-1A	NA	NA	nov_2020	Chevallier	roots	NA	4	153857	NA	ITS1-1F†	X201SC20123127-Z01-F001	k__Fungi	p__Ascomycota	c__Sordariomycetes	o__Phomatosporales	f__Phomatosporaceae	Phomatospora
196	SV154	Che_Roots_4	0.000119612	Che_Roots_4	FKDN202654756-1A	NA	NA	nov_2020	Chevallier	roots	NA	3	168529	NA	ITS1-1F†	X201SC20123127-Z01-F001	k__Fungi	p__Ascomycota	c__Sordariomycetes	o__Hypocreales	f__Nectriaceae	Fusarium
188	SV154	Soil_4	0.000118149	Soil_4	FKDN202654737-1A	NA	NA	nov_2020	Soil	bulk_soil	NA	4	134188	NA	ITS1-1F†	X201SC20123127-Z01-F001	k__Fungi	p__Ascomycota	c__Sordariomycetes	o__Hypocreales	f__Nectriaceae	Fusarium
84	SV120	Soil_1	0.00011655	Soil_1	FKDN202654734-1A	NA	NA	nov_2020	Soil	bulk_soil	NA	1	168870	NA	ITS1-1F†	X201SC20123127-Z01-F001	k__Fungi	p__Ascomycota	c__Sordariomycetes	o__Hypocreales	f__Nectriaceae	Ilyonectria
297	SV26	Ti_Roots_4	0.000113027	Ti_Roots_4	FKDN202654746-1A	NA	NA	nov_2020	Tipple	roots	NA	3	151349	NA	ITS1-1F†	X201SC20123127-Z01-F001	k__Fungi	p__Ascomycota	c__Leotiomycetes	o__Helotiales	f__Helotiaceae	Meliniomyces
628	SV70	Che_Roots_4	0.000112576	Che_Roots_4	FKDN202654756-1A	NA	NA	nov_2020	Chevallier	roots	NA	3	168529	NA	ITS1-1F†	X201SC20123127-Z01-F001	k__Fungi	p__Ascomycota	c__Eurotiomycetes	o__Eurotiales	f__Trichocomaceae	Talaromyces
519	SV51	Che_Roots_2	0.00010923	Che_Roots_2	FKDN202654754-1A	NA	NA	nov_2020	Chevallier	roots	NA	1	169149	NA	ITS1-1F†	X201SC20123127-Z01-F001	k__Fungi	p__Ascomycota	c__Eurotiomycetes	o__Eurotiales	f__Trichocomaceae	Rasamsonia
279	SV26	Che_Rhiz_6	0.000106366	Che_Rhiz_6	FKDN202654753-1A	NA	NA	nov_2020	Chevallier	rhizosphere	NA	5	152328	NA	ITS1-1F†	X201SC20123127-Z01-F001	k__Fungi	p__Ascomycota	c__Leotiomycetes	o__Helotiales	f__Helotiaceae	Meliniomyces
749	SV93	Ti_Roots_4	0.000104954	Ti_Roots_4	FKDN202654746-1A	NA	NA	nov_2020	Tipple	roots	NA	3	151349	NA	ITS1-1F†	X201SC20123127-Z01-F001	k__Fungi	p__Basidiomycota	c__Agaricomycetes	o__Cantharellales	f__Cantharellales_fam_Incertae_sedis	Sistotrema
95	SV120	Ti_Rhiz_5	0.000103694	Ti_Rhiz_5	FKDN202654742-1A	NA	NA	nov_2020	Tipple	rhizosphere	NA	4	137928	NA	ITS1-1F†	X201SC20123127-Z01-F001	k__Fungi	p__Ascomycota	c__Sordariomycetes	o__Hypocreales	f__Nectriaceae	Ilyonectria
419	SV48	Ti_Rhiz_2	0.000103229	Ti_Rhiz_2	FKDN202654740-1A	NA	NA	nov_2020	Tipple	rhizosphere	NA	2	145607	NA	ITS1-1F†	X201SC20123127-Z01-F001	k__Fungi	p__Ascomycota	c__Sordariomycetes	o__Sordariales	f__Chaetomiaceae	Chaetomium
221	SV182	Soil_1	9.99000999000999e-05	Soil_1	FKDN202654734-1A	NA	NA	nov_2020	Soil	bulk_soil	NA	1	168870	NA	ITS1-1F†	X201SC20123127-Z01-F001	k__Fungi	p__Ascomycota	c__Sordariomycetes	o__Hypocreales	f__Nectriaceae	Gibberella
97	SV120	Ti_Roots_2	9.88754564750241e-05	Ti_Roots_2	FKDN202654745-1A	NA	NA	nov_2020	Tipple	roots	NA	2	166122	NA	ITS1-1F†	X201SC20123127-Z01-F001	k__Fungi	p__Ascomycota	c__Sordariomycetes	o__Hypocreales	f__Nectriaceae	Ilyonectria
81	SV120	Che_Roots_2	9.6379349118129e-05	Che_Roots_2	FKDN202654754-1A	NA	NA	nov_2020	Chevallier	roots	NA	1	169149	NA	ITS1-1F†	X201SC20123127-Z01-F001	k__Fungi	p__Ascomycota	c__Sordariomycetes	o__Hypocreales	f__Nectriaceae	Ilyonectria
744	SV93	Che_Roots_5	9.43690701742924e-05	Che_Roots_5	FKDN202654757-1A	NA	NA	nov_2020	Chevallier	roots	NA	4	153857	NA	ITS1-1F†	X201SC20123127-Z01-F001	k__Fungi	p__Basidiomycota	c__Agaricomycetes	o__Cantharellales	f__Cantharellales_fam_Incertae_sedis	Sistotrema
656	SV73	Soil_3	9.35994962645292e-05	Soil_3	FKDN202654736-1A	NA	NA	nov_2020	Soil	bulk_soil	NA	3	158868	NA	ITS1-1F†	X201SC20123127-Z01-F001	k__Fungi	p__Basidiomycota	c__Agaricomycetes	o__Agaricales	f__Strophariaceae	Galerina
280	SV26	Che_Roots_2	8.99540591769204e-05	Che_Roots_2	FKDN202654754-1A	NA	NA	nov_2020	Chevallier	roots	NA	1	169149	NA	ITS1-1F†	X201SC20123127-Z01-F001	k__Fungi	p__Ascomycota	c__Leotiomycetes	o__Helotiales	f__Helotiaceae	Meliniomyces
177	SV154	Ti_Rhiz_5	8.64117519982718e-05	Ti_Rhiz_5	FKDN202654742-1A	NA	NA	nov_2020	Tipple	rhizosphere	NA	4	137928	NA	ITS1-1F†	X201SC20123127-Z01-F001	k__Fungi	p__Ascomycota	c__Sordariomycetes	o__Hypocreales	f__Nectriaceae	Fusarium
735	SV93	Che_Roots_4	8.4432123608629e-05	Che_Roots_4	FKDN202654756-1A	NA	NA	nov_2020	Chevallier	roots	NA	3	168529	NA	ITS1-1F†	X201SC20123127-Z01-F001	k__Fungi	p__Basidiomycota	c__Agaricomycetes	o__Cantharellales	f__Cantharellales_fam_Incertae_sedis	Sistotrema
398	SV43	Ti_Roots_5	8.06664515561292e-05	Ti_Roots_5	FKDN202654747-1A	NA	NA	nov_2020	Tipple	roots	NA	4	147810	NA	ITS1-1F†	X201SC20123127-Z01-F001	k__Fungi	p__Ascomycota	c__Sordariomycetes	o__Hypocreales	f__Hypocreales_fam_Incertae_sedis	Acremonium
405	SV48	Ti_Rhiz_4	8.00813626644671e-05	Ti_Rhiz_4	FKDN202654741-1A	NA	NA	nov_2020	Tipple	rhizosphere	NA	3	155460	NA	ITS1-1F†	X201SC20123127-Z01-F001	k__Fungi	p__Ascomycota	c__Sordariomycetes	o__Sordariales	f__Chaetomiaceae	Chaetomium
516	SV51	Che_Rhiz_6	7.80014607546287e-05	Che_Rhiz_6	FKDN202654753-1A	NA	NA	nov_2020	Chevallier	rhizosphere	NA	5	152328	NA	ITS1-1F†	X201SC20123127-Z01-F001	k__Fungi	p__Ascomycota	c__Eurotiomycetes	o__Eurotiales	f__Trichocomaceae	Rasamsonia
719	SV9	Che_Rhiz_6	7.80014607546287e-05	Che_Rhiz_6	FKDN202654753-1A	NA	NA	nov_2020	Chevallier	rhizosphere	NA	5	152328	NA	ITS1-1F†	X201SC20123127-Z01-F001	k__Fungi	p__Ascomycota	c__Sordariomycetes	o__Hypocreales	f__Hypocreaceae	Trichoderma
730	SV93	Che_Rhiz_4	7.58213346071318e-05	Che_Rhiz_4	FKDN202654751-1A	NA	NA	nov_2020	Chevallier	rhizosphere	NA	3	143428	NA	ITS1-1F†	X201SC20123127-Z01-F001	k__Fungi	p__Basidiomycota	c__Agaricomycetes	o__Cantharellales	f__Cantharellales_fam_Incertae_sedis	Sistotrema
661	SV73	Ti_Rhiz_2	7.50757796150489e-05	Ti_Rhiz_2	FKDN202654740-1A	NA	NA	nov_2020	Tipple	rhizosphere	NA	2	145607	NA	ITS1-1F†	X201SC20123127-Z01-F001	k__Fungi	p__Basidiomycota	c__Agaricomycetes	o__Agaricales	f__Strophariaceae	Galerina
622	SV64	Ti_Roots_1	7.46033588089988e-05	Ti_Roots_1	FKDN202654744-1A	NA	NA	nov_2020	Tipple	roots	NA	1	138221	NA	ITS1-1F†	X201SC20123127-Z01-F001	k__Fungi	p__Ascomycota	c__Sordariomycetes	o__Sordariales	f__Cephalothecaceae	Phialemonium
218	SV182	Che_Roots_6	7.25326215465406e-05	Che_Roots_6	FKDN202654758-1A	NA	NA	nov_2020	Chevallier	roots	NA	5	159052	NA	ITS1-1F†	X201SC20123127-Z01-F001	k__Fungi	p__Ascomycota	c__Sordariomycetes	o__Hypocreales	f__Nectriaceae	Gibberella
747	SV93	Ti_Roots_2	7.25086680816843e-05	Ti_Roots_2	FKDN202654745-1A	NA	NA	nov_2020	Tipple	roots	NA	2	166122	NA	ITS1-1F†	X201SC20123127-Z01-F001	k__Fungi	p__Basidiomycota	c__Agaricomycetes	o__Cantharellales	f__Cantharellales_fam_Incertae_sedis	Sistotrema
202	SV182	Che_Rhiz_6	7.09104188678443e-05	Che_Rhiz_6	FKDN202654753-1A	NA	NA	nov_2020	Chevallier	rhizosphere	NA	5	152328	NA	ITS1-1F†	X201SC20123127-Z01-F001	k__Fungi	p__Ascomycota	c__Sordariomycetes	o__Hypocreales	f__Nectriaceae	Gibberella
312	SV27	Che_Rhiz_6	7.09104188678443e-05	Che_Rhiz_6	FKDN202654753-1A	NA	NA	nov_2020	Chevallier	rhizosphere	NA	5	152328	NA	ITS1-1F†	X201SC20123127-Z01-F001	k__Fungi	p__Ascomycota	c__Leotiomycetes	o__Helotiales	f__Helotiales_fam_Incertae_sedis	Leptodontidium
115	SV125	Che_Rhiz_4	6.82392011464186e-05	Che_Rhiz_4	FKDN202654751-1A	NA	NA	nov_2020	Chevallier	rhizosphere	NA	3	143428	NA	ITS1-1F†	X201SC20123127-Z01-F001	k__Fungi	p__Ascomycota	c__Leotiomycetes	o__Helotiales	f__Hyaloscyphaceae	Hyaloscypha
192	SV154	Soil_1	6.66000666000666e-05	Soil_1	FKDN202654734-1A	NA	NA	nov_2020	Soil	bulk_soil	NA	1	168870	NA	ITS1-1F†	X201SC20123127-Z01-F001	k__Fungi	p__Ascomycota	c__Sordariomycetes	o__Hypocreales	f__Nectriaceae	Fusarium
412	SV48	Ti_Roots_5	6.59998240004693e-05	Ti_Roots_5	FKDN202654747-1A	NA	NA	nov_2020	Tipple	roots	NA	4	147810	NA	ITS1-1F†	X201SC20123127-Z01-F001	k__Fungi	p__Ascomycota	c__Sordariomycetes	o__Sordariales	f__Chaetomiaceae	Chaetomium
224	SV182	Soil_2	6.59605744223738e-05	Soil_2	FKDN202654735-1A	NA	NA	nov_2020	Soil	bulk_soil	NA	2	139968	NA	ITS1-1F†	X201SC20123127-Z01-F001	k__Fungi	p__Ascomycota	c__Sordariomycetes	o__Hypocreales	f__Nectriaceae	Gibberella
49	SV100	Ti_Roots_2	6.59169709833494e-05	Ti_Roots_2	FKDN202654745-1A	NA	NA	nov_2020	Tipple	roots	NA	2	166122	NA	ITS1-1F†	X201SC20123127-Z01-F001	k__Fungi	p__Basidiomycota	c__Microbotryomycetes	o__Microbotryales	f__Ustilentylomataceae	Bauerago
619	SV64	Ti_Roots_4	6.45869663501905e-05	Ti_Roots_4	FKDN202654746-1A	NA	NA	nov_2020	Tipple	roots	NA	3	151349	NA	ITS1-1F†	X201SC20123127-Z01-F001	k__Fungi	p__Ascomycota	c__Sordariomycetes	o__Sordariales	f__Cephalothecaceae	Phialemonium
217	SV182	Soil_4	6.44447547340043e-05	Soil_4	FKDN202654737-1A	NA	NA	nov_2020	Soil	bulk_soil	NA	4	134188	NA	ITS1-1F†	X201SC20123127-Z01-F001	k__Fungi	p__Ascomycota	c__Sordariomycetes	o__Hypocreales	f__Nectriaceae	Gibberella
659	SV73	Soil_4	6.44447547340043e-05	Soil_4	FKDN202654737-1A	NA	NA	nov_2020	Soil	bulk_soil	NA	4	134188	NA	ITS1-1F†	X201SC20123127-Z01-F001	k__Fungi	p__Basidiomycota	c__Agaricomycetes	o__Agaricales	f__Strophariaceae	Galerina
674	SV73	Ti_Rhiz_4	6.40650901315737e-05	Ti_Rhiz_4	FKDN202654741-1A	NA	NA	nov_2020	Tipple	rhizosphere	NA	3	155460	NA	ITS1-1F†	X201SC20123127-Z01-F001	k__Fungi	p__Basidiomycota	c__Agaricomycetes	o__Agaricales	f__Strophariaceae	Galerina
76	SV120	Che_Rhiz_2	6.33214195255115e-05	Che_Rhiz_2	FKDN202654749-1A	NA	NA	nov_2020	Chevallier	rhizosphere	NA	1	157371	NA	ITS1-1F†	X201SC20123127-Z01-F001	k__Fungi	p__Ascomycota	c__Sordariomycetes	o__Hypocreales	f__Nectriaceae	Ilyonectria
604	SV64	Che_Rhiz_4	6.06570676857054e-05	Che_Rhiz_4	FKDN202654751-1A	NA	NA	nov_2020	Chevallier	rhizosphere	NA	3	143428	NA	ITS1-1F†	X201SC20123127-Z01-F001	k__Fungi	p__Ascomycota	c__Sordariomycetes	o__Sordariales	f__Cephalothecaceae	Phialemonium
334	SV4	Che_Rhiz_3	5.69911907902236e-05	Che_Rhiz_3	FKDN202654750-1A	NA	NA	nov_2020	Chevallier	rhizosphere	NA	2	148574	NA	ITS1-1F†	X201SC20123127-Z01-F001	k__Fungi	p__Ascomycota	c__Saccharomycetes	o__Saccharomycetales	f__Saccharomycetales_fam_Incertae_sedis	Candida
114	SV125	Ti_Roots_4	5.65135955564167e-05	Ti_Roots_4	FKDN202654746-1A	NA	NA	nov_2020	Tipple	roots	NA	3	151349	NA	ITS1-1F†	X201SC20123127-Z01-F001	k__Fungi	p__Ascomycota	c__Leotiomycetes	o__Helotiales	f__Hyaloscyphaceae	Hyaloscypha
117	SV125	Ti_Roots_5	5.13331964448095e-05	Ti_Roots_5	FKDN202654747-1A	NA	NA	nov_2020	Tipple	roots	NA	4	147810	NA	ITS1-1F†	X201SC20123127-Z01-F001	k__Fungi	p__Ascomycota	c__Leotiomycetes	o__Helotiales	f__Hyaloscyphaceae	Hyaloscypha
745	SV93	Ti_Roots_5	5.13331964448095e-05	Ti_Roots_5	FKDN202654747-1A	NA	NA	nov_2020	Tipple	roots	NA	4	147810	NA	ITS1-1F†	X201SC20123127-Z01-F001	k__Fungi	p__Basidiomycota	c__Agaricomycetes	o__Cantharellales	f__Cantharellales_fam_Incertae_sedis	Sistotrema
205	SV182	Ti_Roots_4	4.84402247626429e-05	Ti_Roots_4	FKDN202654746-1A	NA	NA	nov_2020	Tipple	roots	NA	3	151349	NA	ITS1-1F†	X201SC20123127-Z01-F001	k__Fungi	p__Ascomycota	c__Sordariomycetes	o__Hypocreales	f__Nectriaceae	Gibberella
195	SV154	Soil_2	4.71146960159813e-05	Soil_2	FKDN202654735-1A	NA	NA	nov_2020	Soil	bulk_soil	NA	2	139968	NA	ITS1-1F†	X201SC20123127-Z01-F001	k__Fungi	p__Ascomycota	c__Sordariomycetes	o__Hypocreales	f__Nectriaceae	Fusarium
86	SV120	Che_Rhiz_4	4.54928007642791e-05	Che_Rhiz_4	FKDN202654751-1A	NA	NA	nov_2020	Chevallier	rhizosphere	NA	3	143428	NA	ITS1-1F†	X201SC20123127-Z01-F001	k__Fungi	p__Ascomycota	c__Sordariomycetes	o__Hypocreales	f__Nectriaceae	Ilyonectria
737	SV93	Che_Roots_3	4.37521876093805e-05	Che_Roots_3	FKDN202654755-1A	NA	NA	nov_2020	Chevallier	roots	NA	2	153822	NA	ITS1-1F†	X201SC20123127-Z01-F001	k__Fungi	p__Basidiomycota	c__Agaricomycetes	o__Cantharellales	f__Cantharellales_fam_Incertae_sedis	Sistotrema
663	SV73	Che_Roots_6	4.35195729279243e-05	Che_Roots_6	FKDN202654758-1A	NA	NA	nov_2020	Chevallier	roots	NA	5	159052	NA	ITS1-1F†	X201SC20123127-Z01-F001	k__Fungi	p__Basidiomycota	c__Agaricomycetes	o__Agaricales	f__Strophariaceae	Galerina
725	SV9	Ti_Roots_6	4.0766740862135e-05	Ti_Roots_6	FKDN202654748-1A	NA	NA	nov_2020	Tipple	roots	NA	5	132836	NA	ITS1-1F†	X201SC20123127-Z01-F001	k__Fungi	p__Ascomycota	c__Sordariomycetes	o__Hypocreales	f__Hypocreaceae	Trichoderma
87	SV120	Soil_2	3.7691756812785e-05	Soil_2	FKDN202654735-1A	NA	NA	nov_2020	Soil	bulk_soil	NA	2	139968	NA	ITS1-1F†	X201SC20123127-Z01-F001	k__Fungi	p__Ascomycota	c__Sordariomycetes	o__Hypocreales	f__Nectriaceae	Ilyonectria
626	SV70	Che_Roots_3	3.64601563411504e-05	Che_Roots_3	FKDN202654755-1A	NA	NA	nov_2020	Chevallier	roots	NA	2	153822	NA	ITS1-1F†	X201SC20123127-Z01-F001	k__Fungi	p__Ascomycota	c__Eurotiomycetes	o__Eurotiales	f__Trichocomaceae	Talaromyces
527	SV54	Che_Roots_4	3.51800515035954e-05	Che_Roots_4	FKDN202654756-1A	NA	NA	nov_2020	Chevallier	roots	NA	3	168529	NA	ITS1-1F†	X201SC20123127-Z01-F001	k__Fungi	p__Ascomycota	c__Archaeorhizomycetes	o__Archaeorhizomycetales	f__Archaeorhizomycetaceae	Archaeorhizomyces
701	SV9	Che_Rhiz_2	3.51785664030619e-05	Che_Rhiz_2	FKDN202654749-1A	NA	NA	nov_2020	Chevallier	rhizosphere	NA	1	157371	NA	ITS1-1F†	X201SC20123127-Z01-F001	k__Fungi	p__Ascomycota	c__Sordariomycetes	o__Hypocreales	f__Hypocreaceae	Trichoderma
184	SV154	Che_Rhiz_5	3.51515471074671e-05	Che_Rhiz_5	FKDN202654752-1A	NA	NA	nov_2020	Chevallier	rhizosphere	NA	4	142946	NA	ITS1-1F†	X201SC20123127-Z01-F001	k__Fungi	p__Ascomycota	c__Sordariomycetes	o__Hypocreales	f__Nectriaceae	Fusarium
635	SV70	Ti_Roots_1	3.3157048359555e-05	Ti_Roots_1	FKDN202654744-1A	NA	NA	nov_2020	Tipple	roots	NA	1	138221	NA	ITS1-1F†	X201SC20123127-Z01-F001	k__Fungi	p__Ascomycota	c__Eurotiomycetes	o__Eurotiales	f__Trichocomaceae	Talaromyces
395	SV43	Ti_Roots_4	3.22934831750953e-05	Ti_Roots_4	FKDN202654746-1A	NA	NA	nov_2020	Tipple	roots	NA	3	151349	NA	ITS1-1F†	X201SC20123127-Z01-F001	k__Fungi	p__Ascomycota	c__Sordariomycetes	o__Hypocreales	f__Hypocreales_fam_Incertae_sedis	Acremonium
641	SV70	Ti_Roots_5	2.93332551113197e-05	Ti_Roots_5	FKDN202654747-1A	NA	NA	nov_2020	Tipple	roots	NA	4	147810	NA	ITS1-1F†	X201SC20123127-Z01-F001	k__Fungi	p__Ascomycota	c__Eurotiomycetes	o__Eurotiales	f__Trichocomaceae	Talaromyces
27	SV100	Che_Roots_3	2.91681250729203e-05	Che_Roots_3	FKDN202654755-1A	NA	NA	nov_2020	Chevallier	roots	NA	2	153822	NA	ITS1-1F†	X201SC20123127-Z01-F001	k__Fungi	p__Basidiomycota	c__Microbotryomycetes	o__Microbotryales	f__Ustilentylomataceae	Bauerago
383	SV43	Che_Rhiz_6	2.83641675471377e-05	Che_Rhiz_6	FKDN202654753-1A	NA	NA	nov_2020	Chevallier	rhizosphere	NA	5	152328	NA	ITS1-1F†	X201SC20123127-Z01-F001	k__Fungi	p__Ascomycota	c__Sordariomycetes	o__Hypocreales	f__Hypocreales_fam_Incertae_sedis	Acremonium
206	SV182	Ti_Rhiz_5	2.59235255994815e-05	Ti_Rhiz_5	FKDN202654742-1A	NA	NA	nov_2020	Tipple	rhizosphere	NA	4	137928	NA	ITS1-1F†	X201SC20123127-Z01-F001	k__Fungi	p__Ascomycota	c__Sordariomycetes	o__Hypocreales	f__Nectriaceae	Gibberella
102	SV125	Che_Roots_2	2.57011597648344e-05	Che_Roots_2	FKDN202654754-1A	NA	NA	nov_2020	Chevallier	roots	NA	1	169149	NA	ITS1-1F†	X201SC20123127-Z01-F001	k__Fungi	p__Ascomycota	c__Leotiomycetes	o__Helotiales	f__Hyaloscyphaceae	Hyaloscypha
618	SV64	Ti_Roots_5	2.19999413334898e-05	Ti_Roots_5	FKDN202654747-1A	NA	NA	nov_2020	Tipple	roots	NA	4	147810	NA	ITS1-1F†	X201SC20123127-Z01-F001	k__Fungi	p__Ascomycota	c__Sordariomycetes	o__Sordariales	f__Cephalothecaceae	Phialemonium
28	SV100	Che_Rhiz_6	2.12731256603533e-05	Che_Rhiz_6	FKDN202654753-1A	NA	NA	nov_2020	Chevallier	rhizosphere	NA	5	152328	NA	ITS1-1F†	X201SC20123127-Z01-F001	k__Fungi	p__Basidiomycota	c__Microbotryomycetes	o__Microbotryales	f__Ustilentylomataceae	Bauerago
31	SV100	Che_Roots_2	1.92758698236258e-05	Che_Roots_2	FKDN202654754-1A	NA	NA	nov_2020	Chevallier	roots	NA	1	169149	NA	ITS1-1F†	X201SC20123127-Z01-F001	k__Fungi	p__Basidiomycota	c__Microbotryomycetes	o__Microbotryales	f__Ustilentylomataceae	Bauerago
397	SV43	Che_Roots_2	1.92758698236258e-05	Che_Roots_2	FKDN202654754-1A	NA	NA	nov_2020	Chevallier	roots	NA	1	169149	NA	ITS1-1F†	X201SC20123127-Z01-F001	k__Fungi	p__Ascomycota	c__Sordariomycetes	o__Hypocreales	f__Hypocreales_fam_Incertae_sedis	Acremonium
632	SV70	Che_Roots_5	1.45183184883527e-05	Che_Roots_5	FKDN202654757-1A	NA	NA	nov_2020	Chevallier	roots	NA	4	153857	NA	ITS1-1F†	X201SC20123127-Z01-F001	k__Fungi	p__Ascomycota	c__Eurotiomycetes	o__Eurotiales	f__Trichocomaceae	Talaromyces
627	SV70	Che_Rhiz_6	1.41820837735689e-05	Che_Rhiz_6	FKDN202654753-1A	NA	NA	nov_2020	Chevallier	rhizosphere	NA	5	152328	NA	ITS1-1F†	X201SC20123127-Z01-F001	k__Fungi	p__Ascomycota	c__Eurotiomycetes	o__Eurotiales	f__Trichocomaceae	Talaromyces
53	SV12	Che_Rhiz_2	1.40714265612248e-05	Che_Rhiz_2	FKDN202654749-1A	NA	NA	nov_2020	Chevallier	rhizosphere	NA	1	157371	NA	ITS1-1F†	X201SC20123127-Z01-F001	k__Fungi	p__Ascomycota	c__Eurotiomycetes	o__Eurotiales	f__Aspergillaceae	Penicillium
743	SV93	Che_Roots_2	1.28505798824172e-05	Che_Roots_2	FKDN202654754-1A	NA	NA	nov_2020	Chevallier	roots	NA	1	169149	NA	ITS1-1F†	X201SC20123127-Z01-F001	k__Fungi	p__Basidiomycota	c__Agaricomycetes	o__Cantharellales	f__Cantharellales_fam_Incertae_sedis	Sistotrema
26	SV100	Che_Rhiz_2	0	Che_Rhiz_2	FKDN202654749-1A	NA	NA	nov_2020	Chevallier	rhizosphere	NA	1	157371	NA	ITS1-1F†	X201SC20123127-Z01-F001	k__Fungi	p__Basidiomycota	c__Microbotryomycetes	o__Microbotryales	f__Ustilentylomataceae	Bauerago
36	SV100	Che_Rhiz_4	0	Che_Rhiz_4	FKDN202654751-1A	NA	NA	nov_2020	Chevallier	rhizosphere	NA	3	143428	NA	ITS1-1F†	X201SC20123127-Z01-F001	k__Fungi	p__Basidiomycota	c__Microbotryomycetes	o__Microbotryales	f__Ustilentylomataceae	Bauerago
38	SV100	Ti_Roots_5	0	Ti_Roots_5	FKDN202654747-1A	NA	NA	nov_2020	Tipple	roots	NA	4	147810	NA	ITS1-1F†	X201SC20123127-Z01-F001	k__Fungi	p__Basidiomycota	c__Microbotryomycetes	o__Microbotryales	f__Ustilentylomataceae	Bauerago
42	SV100	Che_Rhiz_3	0	Che_Rhiz_3	FKDN202654750-1A	NA	NA	nov_2020	Chevallier	rhizosphere	NA	2	148574	NA	ITS1-1F†	X201SC20123127-Z01-F001	k__Fungi	p__Basidiomycota	c__Microbotryomycetes	o__Microbotryales	f__Ustilentylomataceae	Bauerago
44	SV100	Ti_Roots_4	0	Ti_Roots_4	FKDN202654746-1A	NA	NA	nov_2020	Tipple	roots	NA	3	151349	NA	ITS1-1F†	X201SC20123127-Z01-F001	k__Fungi	p__Basidiomycota	c__Microbotryomycetes	o__Microbotryales	f__Ustilentylomataceae	Bauerago
47	SV100	Che_Roots_6	0	Che_Roots_6	FKDN202654758-1A	NA	NA	nov_2020	Chevallier	roots	NA	5	159052	NA	ITS1-1F†	X201SC20123127-Z01-F001	k__Fungi	p__Basidiomycota	c__Microbotryomycetes	o__Microbotryales	f__Ustilentylomataceae	Bauerago
50	SV100	Ti_Roots_6	0	Ti_Roots_6	FKDN202654748-1A	NA	NA	nov_2020	Tipple	roots	NA	5	132836	NA	ITS1-1F†	X201SC20123127-Z01-F001	k__Fungi	p__Basidiomycota	c__Microbotryomycetes	o__Microbotryales	f__Ustilentylomataceae	Bauerago
56	SV12	Che_Rhiz_3	0	Che_Rhiz_3	FKDN202654750-1A	NA	NA	nov_2020	Chevallier	rhizosphere	NA	2	148574	NA	ITS1-1F†	X201SC20123127-Z01-F001	k__Fungi	p__Ascomycota	c__Eurotiomycetes	o__Eurotiales	f__Aspergillaceae	Penicillium
78	SV120	Che_Rhiz_6	0	Che_Rhiz_6	FKDN202654753-1A	NA	NA	nov_2020	Chevallier	rhizosphere	NA	5	152328	NA	ITS1-1F†	X201SC20123127-Z01-F001	k__Fungi	p__Ascomycota	c__Sordariomycetes	o__Hypocreales	f__Nectriaceae	Ilyonectria
89	SV120	Soil_5	0	Soil_5	FKDN202654738-1A	NA	NA	nov_2020	Soil	bulk_soil	NA	5	160871	NA	ITS1-1F†	X201SC20123127-Z01-F001	k__Fungi	p__Ascomycota	c__Sordariomycetes	o__Hypocreales	f__Nectriaceae	Ilyonectria
92	SV120	Che_Rhiz_3	0	Che_Rhiz_3	FKDN202654750-1A	NA	NA	nov_2020	Chevallier	rhizosphere	NA	2	148574	NA	ITS1-1F†	X201SC20123127-Z01-F001	k__Fungi	p__Ascomycota	c__Sordariomycetes	o__Hypocreales	f__Nectriaceae	Ilyonectria
103	SV125	Che_Rhiz_2	0	Che_Rhiz_2	FKDN202654749-1A	NA	NA	nov_2020	Chevallier	rhizosphere	NA	1	157371	NA	ITS1-1F†	X201SC20123127-Z01-F001	k__Fungi	p__Ascomycota	c__Leotiomycetes	o__Helotiales	f__Hyaloscyphaceae	Hyaloscypha
107	SV125	Che_Rhiz_6	0	Che_Rhiz_6	FKDN202654753-1A	NA	NA	nov_2020	Chevallier	rhizosphere	NA	5	152328	NA	ITS1-1F†	X201SC20123127-Z01-F001	k__Fungi	p__Ascomycota	c__Leotiomycetes	o__Helotiales	f__Hyaloscyphaceae	Hyaloscypha
108	SV125	Ti_Roots_6	0	Ti_Roots_6	FKDN202654748-1A	NA	NA	nov_2020	Tipple	roots	NA	5	132836	NA	ITS1-1F†	X201SC20123127-Z01-F001	k__Fungi	p__Ascomycota	c__Leotiomycetes	o__Helotiales	f__Hyaloscyphaceae	Hyaloscypha
121	SV125	Che_Rhiz_3	0	Che_Rhiz_3	FKDN202654750-1A	NA	NA	nov_2020	Chevallier	rhizosphere	NA	2	148574	NA	ITS1-1F†	X201SC20123127-Z01-F001	k__Fungi	p__Ascomycota	c__Leotiomycetes	o__Helotiales	f__Hyaloscyphaceae	Hyaloscypha
153	SV15	Che_Rhiz_3	0	Che_Rhiz_3	FKDN202654750-1A	NA	NA	nov_2020	Chevallier	rhizosphere	NA	2	148574	NA	ITS1-1F†	X201SC20123127-Z01-F001	k__Fungi	p__Basidiomycota	c__Agaricomycetes	o__Auriculariales	f__Exidiaceae	Basidiodendron
158	SV15	Che_Rhiz_2	0	Che_Rhiz_2	FKDN202654749-1A	NA	NA	nov_2020	Chevallier	rhizosphere	NA	1	157371	NA	ITS1-1F†	X201SC20123127-Z01-F001	k__Fungi	p__Basidiomycota	c__Agaricomycetes	o__Auriculariales	f__Exidiaceae	Basidiodendron
175	SV15	Ti_Roots_6	0	Ti_Roots_6	FKDN202654748-1A	NA	NA	nov_2020	Tipple	roots	NA	5	132836	NA	ITS1-1F†	X201SC20123127-Z01-F001	k__Fungi	p__Basidiomycota	c__Agaricomycetes	o__Auriculariales	f__Exidiaceae	Basidiodendron
178	SV154	Che_Rhiz_2	0	Che_Rhiz_2	FKDN202654749-1A	NA	NA	nov_2020	Chevallier	rhizosphere	NA	1	157371	NA	ITS1-1F†	X201SC20123127-Z01-F001	k__Fungi	p__Ascomycota	c__Sordariomycetes	o__Hypocreales	f__Nectriaceae	Fusarium
181	SV154	Che_Rhiz_4	0	Che_Rhiz_4	FKDN202654751-1A	NA	NA	nov_2020	Chevallier	rhizosphere	NA	3	143428	NA	ITS1-1F†	X201SC20123127-Z01-F001	k__Fungi	p__Ascomycota	c__Sordariomycetes	o__Hypocreales	f__Nectriaceae	Fusarium
186	SV154	Che_Rhiz_6	0	Che_Rhiz_6	FKDN202654753-1A	NA	NA	nov_2020	Chevallier	rhizosphere	NA	5	152328	NA	ITS1-1F†	X201SC20123127-Z01-F001	k__Fungi	p__Ascomycota	c__Sordariomycetes	o__Hypocreales	f__Nectriaceae	Fusarium
190	SV154	Che_Roots_2	0	Che_Roots_2	FKDN202654754-1A	NA	NA	nov_2020	Chevallier	roots	NA	1	169149	NA	ITS1-1F†	X201SC20123127-Z01-F001	k__Fungi	p__Ascomycota	c__Sordariomycetes	o__Hypocreales	f__Nectriaceae	Fusarium
191	SV154	Che_Rhiz_3	0	Che_Rhiz_3	FKDN202654750-1A	NA	NA	nov_2020	Chevallier	rhizosphere	NA	2	148574	NA	ITS1-1F†	X201SC20123127-Z01-F001	k__Fungi	p__Ascomycota	c__Sordariomycetes	o__Hypocreales	f__Nectriaceae	Fusarium
193	SV154	Che_Roots_3	0	Che_Roots_3	FKDN202654755-1A	NA	NA	nov_2020	Chevallier	roots	NA	2	153822	NA	ITS1-1F†	X201SC20123127-Z01-F001	k__Fungi	p__Ascomycota	c__Sordariomycetes	o__Hypocreales	f__Nectriaceae	Fusarium
203	SV182	Che_Rhiz_2	0	Che_Rhiz_2	FKDN202654749-1A	NA	NA	nov_2020	Chevallier	rhizosphere	NA	1	157371	NA	ITS1-1F†	X201SC20123127-Z01-F001	k__Fungi	p__Ascomycota	c__Sordariomycetes	o__Hypocreales	f__Nectriaceae	Gibberella
204	SV182	Soil_3	0	Soil_3	FKDN202654736-1A	NA	NA	nov_2020	Soil	bulk_soil	NA	3	158868	NA	ITS1-1F†	X201SC20123127-Z01-F001	k__Fungi	p__Ascomycota	c__Sordariomycetes	o__Hypocreales	f__Nectriaceae	Gibberella
207	SV182	Soil_5	0	Soil_5	FKDN202654738-1A	NA	NA	nov_2020	Soil	bulk_soil	NA	5	160871	NA	ITS1-1F†	X201SC20123127-Z01-F001	k__Fungi	p__Ascomycota	c__Sordariomycetes	o__Hypocreales	f__Nectriaceae	Gibberella
208	SV182	Ti_Roots_5	0	Ti_Roots_5	FKDN202654747-1A	NA	NA	nov_2020	Tipple	roots	NA	4	147810	NA	ITS1-1F†	X201SC20123127-Z01-F001	k__Fungi	p__Ascomycota	c__Sordariomycetes	o__Hypocreales	f__Nectriaceae	Gibberella
210	SV182	Ti_Rhiz_1	0	Ti_Rhiz_1	FKDN202654739-1A	NA	NA	nov_2020	Tipple	rhizosphere	NA	1	140148	NA	ITS1-1F†	X201SC20123127-Z01-F001	k__Fungi	p__Ascomycota	c__Sordariomycetes	o__Hypocreales	f__Nectriaceae	Gibberella
215	SV182	Ti_Roots_2	0	Ti_Roots_2	FKDN202654745-1A	NA	NA	nov_2020	Tipple	roots	NA	2	166122	NA	ITS1-1F†	X201SC20123127-Z01-F001	k__Fungi	p__Ascomycota	c__Sordariomycetes	o__Hypocreales	f__Nectriaceae	Gibberella
216	SV182	Ti_Rhiz_4	0	Ti_Rhiz_4	FKDN202654741-1A	NA	NA	nov_2020	Tipple	rhizosphere	NA	3	155460	NA	ITS1-1F†	X201SC20123127-Z01-F001	k__Fungi	p__Ascomycota	c__Sordariomycetes	o__Hypocreales	f__Nectriaceae	Gibberella
219	SV182	Che_Roots_2	0	Che_Roots_2	FKDN202654754-1A	NA	NA	nov_2020	Chevallier	roots	NA	1	169149	NA	ITS1-1F†	X201SC20123127-Z01-F001	k__Fungi	p__Ascomycota	c__Sordariomycetes	o__Hypocreales	f__Nectriaceae	Gibberella
220	SV182	Che_Rhiz_3	0	Che_Rhiz_3	FKDN202654750-1A	NA	NA	nov_2020	Chevallier	rhizosphere	NA	2	148574	NA	ITS1-1F†	X201SC20123127-Z01-F001	k__Fungi	p__Ascomycota	c__Sordariomycetes	o__Hypocreales	f__Nectriaceae	Gibberella
223	SV182	Che_Rhiz_4	0	Che_Rhiz_4	FKDN202654751-1A	NA	NA	nov_2020	Chevallier	rhizosphere	NA	3	143428	NA	ITS1-1F†	X201SC20123127-Z01-F001	k__Fungi	p__Ascomycota	c__Sordariomycetes	o__Hypocreales	f__Nectriaceae	Gibberella
251	SV20	Che_Rhiz_2	0	Che_Rhiz_2	FKDN202654749-1A	NA	NA	nov_2020	Chevallier	rhizosphere	NA	1	157371	NA	ITS1-1F†	X201SC20123127-Z01-F001	k__Fungi	p__Ascomycota	c__Leotiomycetes	o__Helotiales	f__Myxotrichaceae	Oidiodendron
260	SV20	Che_Rhiz_3	0	Che_Rhiz_3	FKDN202654750-1A	NA	NA	nov_2020	Chevallier	rhizosphere	NA	2	148574	NA	ITS1-1F†	X201SC20123127-Z01-F001	k__Fungi	p__Ascomycota	c__Leotiomycetes	o__Helotiales	f__Myxotrichaceae	Oidiodendron
262	SV20	Ti_Roots_6	0	Ti_Roots_6	FKDN202654748-1A	NA	NA	nov_2020	Tipple	roots	NA	5	132836	NA	ITS1-1F†	X201SC20123127-Z01-F001	k__Fungi	p__Ascomycota	c__Leotiomycetes	o__Helotiales	f__Myxotrichaceae	Oidiodendron
283	SV26	Che_Rhiz_3	0	Che_Rhiz_3	FKDN202654750-1A	NA	NA	nov_2020	Chevallier	rhizosphere	NA	2	148574	NA	ITS1-1F†	X201SC20123127-Z01-F001	k__Fungi	p__Ascomycota	c__Leotiomycetes	o__Helotiales	f__Helotiaceae	Meliniomyces
284	SV26	Che_Rhiz_2	0	Che_Rhiz_2	FKDN202654749-1A	NA	NA	nov_2020	Chevallier	rhizosphere	NA	1	157371	NA	ITS1-1F†	X201SC20123127-Z01-F001	k__Fungi	p__Ascomycota	c__Leotiomycetes	o__Helotiales	f__Helotiaceae	Meliniomyces
299	SV26	Ti_Roots_6	0	Ti_Roots_6	FKDN202654748-1A	NA	NA	nov_2020	Tipple	roots	NA	5	132836	NA	ITS1-1F†	X201SC20123127-Z01-F001	k__Fungi	p__Ascomycota	c__Leotiomycetes	o__Helotiales	f__Helotiaceae	Meliniomyces
302	SV27	Che_Rhiz_2	0	Che_Rhiz_2	FKDN202654749-1A	NA	NA	nov_2020	Chevallier	rhizosphere	NA	1	157371	NA	ITS1-1F†	X201SC20123127-Z01-F001	k__Fungi	p__Ascomycota	c__Leotiomycetes	o__Helotiales	f__Helotiales_fam_Incertae_sedis	Leptodontidium
306	SV27	Che_Rhiz_3	0	Che_Rhiz_3	FKDN202654750-1A	NA	NA	nov_2020	Chevallier	rhizosphere	NA	2	148574	NA	ITS1-1F†	X201SC20123127-Z01-F001	k__Fungi	p__Ascomycota	c__Leotiomycetes	o__Helotiales	f__Helotiales_fam_Incertae_sedis	Leptodontidium
317	SV27	Ti_Roots_6	0	Ti_Roots_6	FKDN202654748-1A	NA	NA	nov_2020	Tipple	roots	NA	5	132836	NA	ITS1-1F†	X201SC20123127-Z01-F001	k__Fungi	p__Ascomycota	c__Leotiomycetes	o__Helotiales	f__Helotiales_fam_Incertae_sedis	Leptodontidium
351	SV42	Che_Roots_3	0	Che_Roots_3	FKDN202654755-1A	NA	NA	nov_2020	Chevallier	roots	NA	2	153822	NA	ITS1-1F†	X201SC20123127-Z01-F001	k__Fungi	p__Ascomycota	c__Sordariomycetes	o__Phomatosporales	f__Phomatosporaceae	Phomatospora
352	SV42	Che_Rhiz_6	0	Che_Rhiz_6	FKDN202654753-1A	NA	NA	nov_2020	Chevallier	rhizosphere	NA	5	152328	NA	ITS1-1F†	X201SC20123127-Z01-F001	k__Fungi	p__Ascomycota	c__Sordariomycetes	o__Phomatosporales	f__Phomatosporaceae	Phomatospora
355	SV42	Che_Roots_2	0	Che_Roots_2	FKDN202654754-1A	NA	NA	nov_2020	Chevallier	roots	NA	1	169149	NA	ITS1-1F†	X201SC20123127-Z01-F001	k__Fungi	p__Ascomycota	c__Sordariomycetes	o__Phomatosporales	f__Phomatosporaceae	Phomatospora
356	SV42	Ti_Rhiz_6	0	Ti_Rhiz_6	FKDN202654743-1A	NA	NA	nov_2020	Tipple	rhizosphere	NA	5	163472	NA	ITS1-1F†	X201SC20123127-Z01-F001	k__Fungi	p__Ascomycota	c__Sordariomycetes	o__Phomatosporales	f__Phomatosporaceae	Phomatospora
358	SV42	Ti_Rhiz_4	0	Ti_Rhiz_4	FKDN202654741-1A	NA	NA	nov_2020	Tipple	rhizosphere	NA	3	155460	NA	ITS1-1F†	X201SC20123127-Z01-F001	k__Fungi	p__Ascomycota	c__Sordariomycetes	o__Phomatosporales	f__Phomatosporaceae	Phomatospora
359	SV42	Che_Rhiz_3	0	Che_Rhiz_3	FKDN202654750-1A	NA	NA	nov_2020	Chevallier	rhizosphere	NA	2	148574	NA	ITS1-1F†	X201SC20123127-Z01-F001	k__Fungi	p__Ascomycota	c__Sordariomycetes	o__Phomatosporales	f__Phomatosporaceae	Phomatospora
360	SV42	Ti_Roots_1	0	Ti_Roots_1	FKDN202654744-1A	NA	NA	nov_2020	Tipple	roots	NA	1	138221	NA	ITS1-1F†	X201SC20123127-Z01-F001	k__Fungi	p__Ascomycota	c__Sordariomycetes	o__Phomatosporales	f__Phomatosporaceae	Phomatospora
361	SV42	Che_Rhiz_5	0	Che_Rhiz_5	FKDN202654752-1A	NA	NA	nov_2020	Chevallier	rhizosphere	NA	4	142946	NA	ITS1-1F†	X201SC20123127-Z01-F001	k__Fungi	p__Ascomycota	c__Sordariomycetes	o__Phomatosporales	f__Phomatosporaceae	Phomatospora
362	SV42	Che_Rhiz_4	0	Che_Rhiz_4	FKDN202654751-1A	NA	NA	nov_2020	Chevallier	rhizosphere	NA	3	143428	NA	ITS1-1F†	X201SC20123127-Z01-F001	k__Fungi	p__Ascomycota	c__Sordariomycetes	o__Phomatosporales	f__Phomatosporaceae	Phomatospora
363	SV42	Soil_2	0	Soil_2	FKDN202654735-1A	NA	NA	nov_2020	Soil	bulk_soil	NA	2	139968	NA	ITS1-1F†	X201SC20123127-Z01-F001	k__Fungi	p__Ascomycota	c__Sordariomycetes	o__Phomatosporales	f__Phomatosporaceae	Phomatospora
364	SV42	Che_Rhiz_2	0	Che_Rhiz_2	FKDN202654749-1A	NA	NA	nov_2020	Chevallier	rhizosphere	NA	1	157371	NA	ITS1-1F†	X201SC20123127-Z01-F001	k__Fungi	p__Ascomycota	c__Sordariomycetes	o__Phomatosporales	f__Phomatosporaceae	Phomatospora
365	SV42	Soil_1	0	Soil_1	FKDN202654734-1A	NA	NA	nov_2020	Soil	bulk_soil	NA	1	168870	NA	ITS1-1F†	X201SC20123127-Z01-F001	k__Fungi	p__Ascomycota	c__Sordariomycetes	o__Phomatosporales	f__Phomatosporaceae	Phomatospora
366	SV42	Ti_Roots_5	0	Ti_Roots_5	FKDN202654747-1A	NA	NA	nov_2020	Tipple	roots	NA	4	147810	NA	ITS1-1F†	X201SC20123127-Z01-F001	k__Fungi	p__Ascomycota	c__Sordariomycetes	o__Phomatosporales	f__Phomatosporaceae	Phomatospora
367	SV42	Soil_4	0	Soil_4	FKDN202654737-1A	NA	NA	nov_2020	Soil	bulk_soil	NA	4	134188	NA	ITS1-1F†	X201SC20123127-Z01-F001	k__Fungi	p__Ascomycota	c__Sordariomycetes	o__Phomatosporales	f__Phomatosporaceae	Phomatospora
368	SV42	Ti_Rhiz_2	0	Ti_Rhiz_2	FKDN202654740-1A	NA	NA	nov_2020	Tipple	rhizosphere	NA	2	145607	NA	ITS1-1F†	X201SC20123127-Z01-F001	k__Fungi	p__Ascomycota	c__Sordariomycetes	o__Phomatosporales	f__Phomatosporaceae	Phomatospora
369	SV42	Ti_Rhiz_1	0	Ti_Rhiz_1	FKDN202654739-1A	NA	NA	nov_2020	Tipple	rhizosphere	NA	1	140148	NA	ITS1-1F†	X201SC20123127-Z01-F001	k__Fungi	p__Ascomycota	c__Sordariomycetes	o__Phomatosporales	f__Phomatosporaceae	Phomatospora
370	SV42	Soil_5	0	Soil_5	FKDN202654738-1A	NA	NA	nov_2020	Soil	bulk_soil	NA	5	160871	NA	ITS1-1F†	X201SC20123127-Z01-F001	k__Fungi	p__Ascomycota	c__Sordariomycetes	o__Phomatosporales	f__Phomatosporaceae	Phomatospora
373	SV42	Ti_Roots_2	0	Ti_Roots_2	FKDN202654745-1A	NA	NA	nov_2020	Tipple	roots	NA	2	166122	NA	ITS1-1F†	X201SC20123127-Z01-F001	k__Fungi	p__Ascomycota	c__Sordariomycetes	o__Phomatosporales	f__Phomatosporaceae	Phomatospora
374	SV42	Soil_3	0	Soil_3	FKDN202654736-1A	NA	NA	nov_2020	Soil	bulk_soil	NA	3	158868	NA	ITS1-1F†	X201SC20123127-Z01-F001	k__Fungi	p__Ascomycota	c__Sordariomycetes	o__Phomatosporales	f__Phomatosporaceae	Phomatospora
375	SV42	Ti_Roots_6	0	Ti_Roots_6	FKDN202654748-1A	NA	NA	nov_2020	Tipple	roots	NA	5	132836	NA	ITS1-1F†	X201SC20123127-Z01-F001	k__Fungi	p__Ascomycota	c__Sordariomycetes	o__Phomatosporales	f__Phomatosporaceae	Phomatospora
376	SV43	Che_Rhiz_2	0	Che_Rhiz_2	FKDN202654749-1A	NA	NA	nov_2020	Chevallier	rhizosphere	NA	1	157371	NA	ITS1-1F†	X201SC20123127-Z01-F001	k__Fungi	p__Ascomycota	c__Sordariomycetes	o__Hypocreales	f__Hypocreales_fam_Incertae_sedis	Acremonium
378	SV43	Che_Rhiz_3	0	Che_Rhiz_3	FKDN202654750-1A	NA	NA	nov_2020	Chevallier	rhizosphere	NA	2	148574	NA	ITS1-1F†	X201SC20123127-Z01-F001	k__Fungi	p__Ascomycota	c__Sordariomycetes	o__Hypocreales	f__Hypocreales_fam_Incertae_sedis	Acremonium
393	SV43	Ti_Roots_6	0	Ti_Roots_6	FKDN202654748-1A	NA	NA	nov_2020	Tipple	roots	NA	5	132836	NA	ITS1-1F†	X201SC20123127-Z01-F001	k__Fungi	p__Ascomycota	c__Sordariomycetes	o__Hypocreales	f__Hypocreales_fam_Incertae_sedis	Acremonium
402	SV48	Che_Roots_2	0	Che_Roots_2	FKDN202654754-1A	NA	NA	nov_2020	Chevallier	roots	NA	1	169149	NA	ITS1-1F†	X201SC20123127-Z01-F001	k__Fungi	p__Ascomycota	c__Sordariomycetes	o__Sordariales	f__Chaetomiaceae	Chaetomium
404	SV48	Che_Roots_3	0	Che_Roots_3	FKDN202654755-1A	NA	NA	nov_2020	Chevallier	roots	NA	2	153822	NA	ITS1-1F†	X201SC20123127-Z01-F001	k__Fungi	p__Ascomycota	c__Sordariomycetes	o__Sordariales	f__Chaetomiaceae	Chaetomium
406	SV48	Che_Rhiz_6	0	Che_Rhiz_6	FKDN202654753-1A	NA	NA	nov_2020	Chevallier	rhizosphere	NA	5	152328	NA	ITS1-1F†	X201SC20123127-Z01-F001	k__Fungi	p__Ascomycota	c__Sordariomycetes	o__Sordariales	f__Chaetomiaceae	Chaetomium
407	SV48	Ti_Rhiz_6	0	Ti_Rhiz_6	FKDN202654743-1A	NA	NA	nov_2020	Tipple	rhizosphere	NA	5	163472	NA	ITS1-1F†	X201SC20123127-Z01-F001	k__Fungi	p__Ascomycota	c__Sordariomycetes	o__Sordariales	f__Chaetomiaceae	Chaetomium
409	SV48	Soil_2	0	Soil_2	FKDN202654735-1A	NA	NA	nov_2020	Soil	bulk_soil	NA	2	139968	NA	ITS1-1F†	X201SC20123127-Z01-F001	k__Fungi	p__Ascomycota	c__Sordariomycetes	o__Sordariales	f__Chaetomiaceae	Chaetomium
410	SV48	Ti_Roots_1	0	Ti_Roots_1	FKDN202654744-1A	NA	NA	nov_2020	Tipple	roots	NA	1	138221	NA	ITS1-1F†	X201SC20123127-Z01-F001	k__Fungi	p__Ascomycota	c__Sordariomycetes	o__Sordariales	f__Chaetomiaceae	Chaetomium
411	SV48	Soil_1	0	Soil_1	FKDN202654734-1A	NA	NA	nov_2020	Soil	bulk_soil	NA	1	168870	NA	ITS1-1F†	X201SC20123127-Z01-F001	k__Fungi	p__Ascomycota	c__Sordariomycetes	o__Sordariales	f__Chaetomiaceae	Chaetomium
413	SV48	Che_Rhiz_4	0	Che_Rhiz_4	FKDN202654751-1A	NA	NA	nov_2020	Chevallier	rhizosphere	NA	3	143428	NA	ITS1-1F†	X201SC20123127-Z01-F001	k__Fungi	p__Ascomycota	c__Sordariomycetes	o__Sordariales	f__Chaetomiaceae	Chaetomium
414	SV48	Che_Rhiz_3	0	Che_Rhiz_3	FKDN202654750-1A	NA	NA	nov_2020	Chevallier	rhizosphere	NA	2	148574	NA	ITS1-1F†	X201SC20123127-Z01-F001	k__Fungi	p__Ascomycota	c__Sordariomycetes	o__Sordariales	f__Chaetomiaceae	Chaetomium
415	SV48	Che_Rhiz_2	0	Che_Rhiz_2	FKDN202654749-1A	NA	NA	nov_2020	Chevallier	rhizosphere	NA	1	157371	NA	ITS1-1F†	X201SC20123127-Z01-F001	k__Fungi	p__Ascomycota	c__Sordariomycetes	o__Sordariales	f__Chaetomiaceae	Chaetomium
416	SV48	Che_Rhiz_5	0	Che_Rhiz_5	FKDN202654752-1A	NA	NA	nov_2020	Chevallier	rhizosphere	NA	4	142946	NA	ITS1-1F†	X201SC20123127-Z01-F001	k__Fungi	p__Ascomycota	c__Sordariomycetes	o__Sordariales	f__Chaetomiaceae	Chaetomium
420	SV48	Ti_Roots_2	0	Ti_Roots_2	FKDN202654745-1A	NA	NA	nov_2020	Tipple	roots	NA	2	166122	NA	ITS1-1F†	X201SC20123127-Z01-F001	k__Fungi	p__Ascomycota	c__Sordariomycetes	o__Sordariales	f__Chaetomiaceae	Chaetomium
421	SV48	Soil_5	0	Soil_5	FKDN202654738-1A	NA	NA	nov_2020	Soil	bulk_soil	NA	5	160871	NA	ITS1-1F†	X201SC20123127-Z01-F001	k__Fungi	p__Ascomycota	c__Sordariomycetes	o__Sordariales	f__Chaetomiaceae	Chaetomium
422	SV48	Soil_4	0	Soil_4	FKDN202654737-1A	NA	NA	nov_2020	Soil	bulk_soil	NA	4	134188	NA	ITS1-1F†	X201SC20123127-Z01-F001	k__Fungi	p__Ascomycota	c__Sordariomycetes	o__Sordariales	f__Chaetomiaceae	Chaetomium
423	SV48	Soil_3	0	Soil_3	FKDN202654736-1A	NA	NA	nov_2020	Soil	bulk_soil	NA	3	158868	NA	ITS1-1F†	X201SC20123127-Z01-F001	k__Fungi	p__Ascomycota	c__Sordariomycetes	o__Sordariales	f__Chaetomiaceae	Chaetomium
425	SV48	Ti_Roots_6	0	Ti_Roots_6	FKDN202654748-1A	NA	NA	nov_2020	Tipple	roots	NA	5	132836	NA	ITS1-1F†	X201SC20123127-Z01-F001	k__Fungi	p__Ascomycota	c__Sordariomycetes	o__Sordariales	f__Chaetomiaceae	Chaetomium
427	SV49	Che_Rhiz_3	0	Che_Rhiz_3	FKDN202654750-1A	NA	NA	nov_2020	Chevallier	rhizosphere	NA	2	148574	NA	ITS1-1F†	X201SC20123127-Z01-F001	k__Fungi	p__Basidiomycota	c__Tremellomycetes	o__Filobasidiales	f__Piskurozymaceae	Solicoccozyma
428	SV49	Che_Rhiz_2	0	Che_Rhiz_2	FKDN202654749-1A	NA	NA	nov_2020	Chevallier	rhizosphere	NA	1	157371	NA	ITS1-1F†	X201SC20123127-Z01-F001	k__Fungi	p__Basidiomycota	c__Tremellomycetes	o__Filobasidiales	f__Piskurozymaceae	Solicoccozyma
448	SV49	Ti_Roots_6	0	Ti_Roots_6	FKDN202654748-1A	NA	NA	nov_2020	Tipple	roots	NA	5	132836	NA	ITS1-1F†	X201SC20123127-Z01-F001	k__Fungi	p__Basidiomycota	c__Tremellomycetes	o__Filobasidiales	f__Piskurozymaceae	Solicoccozyma
452	SV5	Che_Rhiz_3	0	Che_Rhiz_3	FKDN202654750-1A	NA	NA	nov_2020	Chevallier	rhizosphere	NA	2	148574	NA	ITS1-1F†	X201SC20123127-Z01-F001	k__Fungi	p__Ascomycota	c__Sordariomycetes	o__Sordariales	f__Lasiosphaeriaceae	Fimetariella
560	SV57	Che_Rhiz_3	0	Che_Rhiz_3	FKDN202654750-1A	NA	NA	nov_2020	Chevallier	rhizosphere	NA	2	148574	NA	ITS1-1F†	X201SC20123127-Z01-F001	k__Fungi	p__Mortierellomycota	c__Mortierellomycetes	o__Mortierellales	f__Mortierellaceae	Mortierella
579	SV59	Che_Rhiz_6	0	Che_Rhiz_6	FKDN202654753-1A	NA	NA	nov_2020	Chevallier	rhizosphere	NA	5	152328	NA	ITS1-1F†	X201SC20123127-Z01-F001	k__Fungi	p__Ascomycota	c__Saccharomycetes	o__Saccharomycetales	f__Trichomonascaceae	Blastobotrys
583	SV59	Che_Rhiz_3	0	Che_Rhiz_3	FKDN202654750-1A	NA	NA	nov_2020	Chevallier	rhizosphere	NA	2	148574	NA	ITS1-1F†	X201SC20123127-Z01-F001	k__Fungi	p__Ascomycota	c__Saccharomycetes	o__Saccharomycetales	f__Trichomonascaceae	Blastobotrys
584	SV59	Che_Rhiz_2	0	Che_Rhiz_2	FKDN202654749-1A	NA	NA	nov_2020	Chevallier	rhizosphere	NA	1	157371	NA	ITS1-1F†	X201SC20123127-Z01-F001	k__Fungi	p__Ascomycota	c__Saccharomycetes	o__Saccharomycetales	f__Trichomonascaceae	Blastobotrys
599	SV59	Ti_Roots_6	0	Ti_Roots_6	FKDN202654748-1A	NA	NA	nov_2020	Tipple	roots	NA	5	132836	NA	ITS1-1F†	X201SC20123127-Z01-F001	k__Fungi	p__Ascomycota	c__Saccharomycetes	o__Saccharomycetales	f__Trichomonascaceae	Blastobotrys
602	SV64	Che_Rhiz_2	0	Che_Rhiz_2	FKDN202654749-1A	NA	NA	nov_2020	Chevallier	rhizosphere	NA	1	157371	NA	ITS1-1F†	X201SC20123127-Z01-F001	k__Fungi	p__Ascomycota	c__Sordariomycetes	o__Sordariales	f__Cephalothecaceae	Phialemonium
606	SV64	Che_Rhiz_3	0	Che_Rhiz_3	FKDN202654750-1A	NA	NA	nov_2020	Chevallier	rhizosphere	NA	2	148574	NA	ITS1-1F†	X201SC20123127-Z01-F001	k__Fungi	p__Ascomycota	c__Sordariomycetes	o__Sordariales	f__Cephalothecaceae	Phialemonium
612	SV64	Che_Rhiz_6	0	Che_Rhiz_6	FKDN202654753-1A	NA	NA	nov_2020	Chevallier	rhizosphere	NA	5	152328	NA	ITS1-1F†	X201SC20123127-Z01-F001	k__Fungi	p__Ascomycota	c__Sordariomycetes	o__Sordariales	f__Cephalothecaceae	Phialemonium
617	SV64	Ti_Roots_6	0	Ti_Roots_6	FKDN202654748-1A	NA	NA	nov_2020	Tipple	roots	NA	5	132836	NA	ITS1-1F†	X201SC20123127-Z01-F001	k__Fungi	p__Ascomycota	c__Sordariomycetes	o__Sordariales	f__Cephalothecaceae	Phialemonium
620	SV64	Che_Roots_3	0	Che_Roots_3	FKDN202654755-1A	NA	NA	nov_2020	Chevallier	roots	NA	2	153822	NA	ITS1-1F†	X201SC20123127-Z01-F001	k__Fungi	p__Ascomycota	c__Sordariomycetes	o__Sordariales	f__Cephalothecaceae	Phialemonium
624	SV64	Che_Roots_2	0	Che_Roots_2	FKDN202654754-1A	NA	NA	nov_2020	Chevallier	roots	NA	1	169149	NA	ITS1-1F†	X201SC20123127-Z01-F001	k__Fungi	p__Ascomycota	c__Sordariomycetes	o__Sordariales	f__Cephalothecaceae	Phialemonium
630	SV70	Che_Roots_2	0	Che_Roots_2	FKDN202654754-1A	NA	NA	nov_2020	Chevallier	roots	NA	1	169149	NA	ITS1-1F†	X201SC20123127-Z01-F001	k__Fungi	p__Ascomycota	c__Eurotiomycetes	o__Eurotiales	f__Trichocomaceae	Talaromyces
634	SV70	Che_Rhiz_3	0	Che_Rhiz_3	FKDN202654750-1A	NA	NA	nov_2020	Chevallier	rhizosphere	NA	2	148574	NA	ITS1-1F†	X201SC20123127-Z01-F001	k__Fungi	p__Ascomycota	c__Eurotiomycetes	o__Eurotiales	f__Trichocomaceae	Talaromyces
637	SV70	Che_Rhiz_4	0	Che_Rhiz_4	FKDN202654751-1A	NA	NA	nov_2020	Chevallier	rhizosphere	NA	3	143428	NA	ITS1-1F†	X201SC20123127-Z01-F001	k__Fungi	p__Ascomycota	c__Eurotiomycetes	o__Eurotiales	f__Trichocomaceae	Talaromyces
639	SV70	Che_Rhiz_2	0	Che_Rhiz_2	FKDN202654749-1A	NA	NA	nov_2020	Chevallier	rhizosphere	NA	1	157371	NA	ITS1-1F†	X201SC20123127-Z01-F001	k__Fungi	p__Ascomycota	c__Eurotiomycetes	o__Eurotiales	f__Trichocomaceae	Talaromyces
648	SV70	Ti_Roots_2	0	Ti_Roots_2	FKDN202654745-1A	NA	NA	nov_2020	Tipple	roots	NA	2	166122	NA	ITS1-1F†	X201SC20123127-Z01-F001	k__Fungi	p__Ascomycota	c__Eurotiomycetes	o__Eurotiales	f__Trichocomaceae	Talaromyces
650	SV70	Ti_Roots_6	0	Ti_Roots_6	FKDN202654748-1A	NA	NA	nov_2020	Tipple	roots	NA	5	132836	NA	ITS1-1F†	X201SC20123127-Z01-F001	k__Fungi	p__Ascomycota	c__Eurotiomycetes	o__Eurotiales	f__Trichocomaceae	Talaromyces
651	SV73	Che_Rhiz_2	0	Che_Rhiz_2	FKDN202654749-1A	NA	NA	nov_2020	Chevallier	rhizosphere	NA	1	157371	NA	ITS1-1F†	X201SC20123127-Z01-F001	k__Fungi	p__Basidiomycota	c__Agaricomycetes	o__Agaricales	f__Strophariaceae	Galerina
653	SV73	Che_Rhiz_3	0	Che_Rhiz_3	FKDN202654750-1A	NA	NA	nov_2020	Chevallier	rhizosphere	NA	2	148574	NA	ITS1-1F†	X201SC20123127-Z01-F001	k__Fungi	p__Basidiomycota	c__Agaricomycetes	o__Agaricales	f__Strophariaceae	Galerina
654	SV73	Che_Rhiz_5	0	Che_Rhiz_5	FKDN202654752-1A	NA	NA	nov_2020	Chevallier	rhizosphere	NA	4	142946	NA	ITS1-1F†	X201SC20123127-Z01-F001	k__Fungi	p__Basidiomycota	c__Agaricomycetes	o__Agaricales	f__Strophariaceae	Galerina
658	SV73	Che_Rhiz_6	0	Che_Rhiz_6	FKDN202654753-1A	NA	NA	nov_2020	Chevallier	rhizosphere	NA	5	152328	NA	ITS1-1F†	X201SC20123127-Z01-F001	k__Fungi	p__Basidiomycota	c__Agaricomycetes	o__Agaricales	f__Strophariaceae	Galerina
664	SV73	Che_Roots_5	0	Che_Roots_5	FKDN202654757-1A	NA	NA	nov_2020	Chevallier	roots	NA	4	153857	NA	ITS1-1F†	X201SC20123127-Z01-F001	k__Fungi	p__Basidiomycota	c__Agaricomycetes	o__Agaricales	f__Strophariaceae	Galerina
666	SV73	Che_Roots_3	0	Che_Roots_3	FKDN202654755-1A	NA	NA	nov_2020	Chevallier	roots	NA	2	153822	NA	ITS1-1F†	X201SC20123127-Z01-F001	k__Fungi	p__Basidiomycota	c__Agaricomycetes	o__Agaricales	f__Strophariaceae	Galerina
668	SV73	Ti_Roots_6	0	Ti_Roots_6	FKDN202654748-1A	NA	NA	nov_2020	Tipple	roots	NA	5	132836	NA	ITS1-1F†	X201SC20123127-Z01-F001	k__Fungi	p__Basidiomycota	c__Agaricomycetes	o__Agaricales	f__Strophariaceae	Galerina
670	SV73	Ti_Roots_4	0	Ti_Roots_4	FKDN202654746-1A	NA	NA	nov_2020	Tipple	roots	NA	3	151349	NA	ITS1-1F†	X201SC20123127-Z01-F001	k__Fungi	p__Basidiomycota	c__Agaricomycetes	o__Agaricales	f__Strophariaceae	Galerina
671	SV73	Ti_Roots_2	0	Ti_Roots_2	FKDN202654745-1A	NA	NA	nov_2020	Tipple	roots	NA	2	166122	NA	ITS1-1F†	X201SC20123127-Z01-F001	k__Fungi	p__Basidiomycota	c__Agaricomycetes	o__Agaricales	f__Strophariaceae	Galerina
672	SV73	Che_Roots_2	0	Che_Roots_2	FKDN202654754-1A	NA	NA	nov_2020	Chevallier	roots	NA	1	169149	NA	ITS1-1F†	X201SC20123127-Z01-F001	k__Fungi	p__Basidiomycota	c__Agaricomycetes	o__Agaricales	f__Strophariaceae	Galerina
673	SV73	Ti_Roots_5	0	Ti_Roots_5	FKDN202654747-1A	NA	NA	nov_2020	Tipple	roots	NA	4	147810	NA	ITS1-1F†	X201SC20123127-Z01-F001	k__Fungi	p__Basidiomycota	c__Agaricomycetes	o__Agaricales	f__Strophariaceae	Galerina
713	SV9	Che_Rhiz_3	0	Che_Rhiz_3	FKDN202654750-1A	NA	NA	nov_2020	Chevallier	rhizosphere	NA	2	148574	NA	ITS1-1F†	X201SC20123127-Z01-F001	k__Fungi	p__Ascomycota	c__Sordariomycetes	o__Hypocreales	f__Hypocreaceae	Trichoderma
727	SV93	Che_Rhiz_3	0	Che_Rhiz_3	FKDN202654750-1A	NA	NA	nov_2020	Chevallier	rhizosphere	NA	2	148574	NA	ITS1-1F†	X201SC20123127-Z01-F001	k__Fungi	p__Basidiomycota	c__Agaricomycetes	o__Cantharellales	f__Cantharellales_fam_Incertae_sedis	Sistotrema
728	SV93	Che_Rhiz_2	0	Che_Rhiz_2	FKDN202654749-1A	NA	NA	nov_2020	Chevallier	rhizosphere	NA	1	157371	NA	ITS1-1F†	X201SC20123127-Z01-F001	k__Fungi	p__Basidiomycota	c__Agaricomycetes	o__Cantharellales	f__Cantharellales_fam_Incertae_sedis	Sistotrema
729	SV93	Che_Rhiz_6	0	Che_Rhiz_6	FKDN202654753-1A	NA	NA	nov_2020	Chevallier	rhizosphere	NA	5	152328	NA	ITS1-1F†	X201SC20123127-Z01-F001	k__Fungi	p__Basidiomycota	c__Agaricomycetes	o__Cantharellales	f__Cantharellales_fam_Incertae_sedis	Sistotrema
748	SV93	Ti_Roots_6	0	Ti_Roots_6	FKDN202654748-1A	NA	NA	nov_2020	Tipple	roots	NA	5	132836	NA	ITS1-1F†	X201SC20123127-Z01-F001	k__Fungi	p__Basidiomycota	c__Agaricomycetes	o__Cantharellales	f__Cantharellales_fam_Incertae_sedis	Sistotrema

## Sheet: D
	Axis.1	Axis.2	X.SampleID	X.SampleIDNovogene	BarcodeSequence	LinkerPrimerSequence	Date	Cultivar	Material	used_name	Rep	Read_number	low_read	Type	Experiment
Che_Rhiz_2	-0.265177	-0.273743	Che_Rhiz_2	FKDN202654749-1A	NA	NA	nov_2020	Chevallier	rhizosphere	NA	1	157371	NA	ITS1-1F†	X201SC20123127-Z01-F001
Che_Rhiz_3	-0.317522	-0.406091	Che_Rhiz_3	FKDN202654750-1A	NA	NA	nov_2020	Chevallier	rhizosphere	NA	2	148574	NA	ITS1-1F†	X201SC20123127-Z01-F001
Che_Rhiz_4	-0.278933	-0.20809	Che_Rhiz_4	FKDN202654751-1A	NA	NA	nov_2020	Chevallier	rhizosphere	NA	3	143428	NA	ITS1-1F†	X201SC20123127-Z01-F001
Che_Rhiz_5	0.0483059	-0.0126202	Che_Rhiz_5	FKDN202654752-1A	NA	NA	nov_2020	Chevallier	rhizosphere	NA	4	142946	NA	ITS1-1F†	X201SC20123127-Z01-F001
Che_Rhiz_6	-0.288777	-0.315612	Che_Rhiz_6	FKDN202654753-1A	NA	NA	nov_2020	Chevallier	rhizosphere	NA	5	152328	NA	ITS1-1F†	X201SC20123127-Z01-F001
Che_Roots_2	-0.316236	0.00956554	Che_Roots_2	FKDN202654754-1A	NA	NA	nov_2020	Chevallier	roots	NA	1	169149	NA	ITS1-1F†	X201SC20123127-Z01-F001
Che_Roots_3	-0.318744	0.0631525	Che_Roots_3	FKDN202654755-1A	NA	NA	nov_2020	Chevallier	roots	NA	2	153822	NA	ITS1-1F†	X201SC20123127-Z01-F001
Che_Roots_4	0.291979	-0.0265863	Che_Roots_4	FKDN202654756-1A	NA	NA	nov_2020	Chevallier	roots	NA	3	168529	NA	ITS1-1F†	X201SC20123127-Z01-F001
Che_Roots_5	-0.0111723	0.0582335	Che_Roots_5	FKDN202654757-1A	NA	NA	nov_2020	Chevallier	roots	NA	4	153857	NA	ITS1-1F†	X201SC20123127-Z01-F001
Che_Roots_6	0.00606724	0.145557	Che_Roots_6	FKDN202654758-1A	NA	NA	nov_2020	Chevallier	roots	NA	5	159052	NA	ITS1-1F†	X201SC20123127-Z01-F001
Soil_1	0.352582	-0.0850056	Soil_1	FKDN202654734-1A	NA	NA	nov_2020	Soil	bulk_soil	NA	1	168870	NA	ITS1-1F†	X201SC20123127-Z01-F001
Soil_2	0.337164	-0.0576409	Soil_2	FKDN202654735-1A	NA	NA	nov_2020	Soil	bulk_soil	NA	2	139968	NA	ITS1-1F†	X201SC20123127-Z01-F001
Soil_3	0.280575	-0.0647254	Soil_3	FKDN202654736-1A	NA	NA	nov_2020	Soil	bulk_soil	NA	3	158868	NA	ITS1-1F†	X201SC20123127-Z01-F001
Soil_4	0.145682	-0.107331	Soil_4	FKDN202654737-1A	NA	NA	nov_2020	Soil	bulk_soil	NA	4	134188	NA	ITS1-1F†	X201SC20123127-Z01-F001
Soil_5	0.165121	-0.0290604	Soil_5	FKDN202654738-1A	NA	NA	nov_2020	Soil	bulk_soil	NA	5	160871	NA	ITS1-1F†	X201SC20123127-Z01-F001
Ti_Rhiz_1	0.289196	0.0374201	Ti_Rhiz_1	FKDN202654739-1A	NA	NA	nov_2020	Tipple	rhizosphere	NA	1	140148	NA	ITS1-1F†	X201SC20123127-Z01-F001
Ti_Rhiz_2	0.117735	0.0538614	Ti_Rhiz_2	FKDN202654740-1A	NA	NA	nov_2020	Tipple	rhizosphere	NA	2	145607	NA	ITS1-1F†	X201SC20123127-Z01-F001
Ti_Rhiz_4	0.267963	-0.0149975	Ti_Rhiz_4	FKDN202654741-1A	NA	NA	nov_2020	Tipple	rhizosphere	NA	3	155460	NA	ITS1-1F†	X201SC20123127-Z01-F001
Ti_Rhiz_5	0.270099	-0.0105535	Ti_Rhiz_5	FKDN202654742-1A	NA	NA	nov_2020	Tipple	rhizosphere	NA	4	137928	NA	ITS1-1F†	X201SC20123127-Z01-F001
Ti_Rhiz_6	0.289739	0.0251787	Ti_Rhiz_6	FKDN202654743-1A	NA	NA	nov_2020	Tipple	rhizosphere	NA	5	163472	NA	ITS1-1F†	X201SC20123127-Z01-F001
Ti_Roots_1	-0.0427381	0.280535	Ti_Roots_1	FKDN202654744-1A	NA	NA	nov_2020	Tipple	roots	NA	1	138221	NA	ITS1-1F†	X201SC20123127-Z01-F001
Ti_Roots_2	-0.284223	0.199268	Ti_Roots_2	FKDN202654745-1A	NA	NA	nov_2020	Tipple	roots	NA	2	166122	NA	ITS1-1F†	X201SC20123127-Z01-F001
Ti_Roots_4	-0.261086	0.183779	Ti_Roots_4	FKDN202654746-1A	NA	NA	nov_2020	Tipple	roots	NA	3	151349	NA	ITS1-1F†	X201SC20123127-Z01-F001
Ti_Roots_5	-0.207968	0.281824	Ti_Roots_5	FKDN202654747-1A	NA	NA	nov_2020	Tipple	roots	NA	4	147810	NA	ITS1-1F†	X201SC20123127-Z01-F001
Ti_Roots_6	-0.269632	0.273682	Ti_Roots_6	FKDN202654748-1A	NA	NA	nov_2020	Tipple	roots	NA	5	132836	NA	ITS1-1F†	X201SC20123127-Z01-F001
