# Supplementary material for: The genotype of barley cultivars influences multiple aspects of their associated microbiota via differential root exudate secretion
Source: PLoS Biol. 2024 Apr 25;22(4):e3002232. doi: 10.1371/journal.pbio.3002232 (PMC11045101; doi:10.1371/journal.pbio.3002232)
Supplement: S1 Table — (XLSX) [file pbio.3002232.s001.xlsx]

## Sheet: List of isolates
Query	BLAST match in NCBI database	E Value
Che1.1a	Pseudomonas sp. NIBR-H-19	0
Che1.1b	Stenotrophomonas rhizophila Bl2-2	0
Che1.2a	Pseudomonas brassicacearum B21-016	0
Che1.2b	Pseudomonas sp.Y39-6	0
Che1.3a	Pseudomonas marginalis HRI 95	0
Che1.3b	Pseudomonas fluorescens NCIMB 11764	0
Che1.4a	Pseudomonas sp. NIBR-H-19	0
Che1.4b	Pseudomonas frederiksbergensis DSM 13022T	0
Che1.5a	Pseudomonas marginalis HRI 95	0
Che1.5b	Pseudomonas sp. MHGNU B109	0
Che1.6a	Stenotrophomonas sp. DR822	0
Che1.6b	Pseudomonas fluorescens NCIMB 11764	0
Che1.7a	Pseudomonas marginalis HRI 95	0
Che1.7b	Pseudomonas fluorescens NCIMB 11764	0
Che1.8a	Pseudomonas marginalis HRI 95	0
Che1.8b	Pseudomonas sp. CP080030	0
Che1.9a	Stenotrophomonas sp. DR822	0
Che1.9b	Pseudomonas sp. CP080030	0
Che1.10a	Pseudomonas jessenii DSM 17150T	0
Che1.10b	Pseudomonas fluorescens NCIMB 11764	0
Che1.11a	Stenotrophomonas sp. DR822	0
Che1.11b	Pseudomonas veronii OST1911	0
Che1.12a	Pseudomonas brassicacearum B21-016	0
Che1.12b	Pseudomonas sp. Y39-6	0
Che1.13a	Pseudomonas marginalis HRI 95	0
Che1.13b	Pseudomonas frederiksbergensis DSM 13022T	0
Che1.14a	Pseudomonas sp. NIBR-H-19	0
Che1.14b	Pseudomonas sp. CP080030	0
Che1.15a	Pseudomonas sp. NIBR-H-19	0
Che1.15b	Pseudomonas fluorescens NCIMB 11764	0
Che1.16a	Pseudomonas sp. NIBR-H-19	0
Che1.16b	Pseudomonas sp. CP080030	0
Che1.17a	Pseudomonas kilonensis 520-20T	0
Che1.17b	Pseudomonas sp. Y39-6	0
Che1.18a	Pseudomonas sp. NIBR-H-19	0
Che1.18b	Pseudomonas fluorescens NCIMB 11764	0
Che1.19a	Stenotrophomonas sp. DR822	0
Che1.19b	Pseudomonas sp. Y39-6	0
Che1.20a	Pseudomonas sp. RZ32	0
Che1.20b	Pseudomonas fluorescens NCIMB 11764	0
Che2.10a	Pseudomonas sp. B16-156	0
Che2.1a	Pseudomonas frederiksbergensis DSM 13022T	0
Che2.1b	Pseudomonas sp. CP080030	0
Che2.2a	Pseudomonas sp. NIBR-H-19	0
Che2.2b	Pseudomonas sp. CP080030	0
Che2.3a	Pseudomonas sp. S34	0
Che2.3b	Pseudomonas sp. CP080030	0
Che2.4a	Pseudomonas sp. NIBR-H-19	0
Che2.4b	Pseudomonas sp. CP080030	0
Che2.5a	Pseudomonas sp. NIBR-H-19	0
Che2.5b	Pseudomonas sp. CP080030	0
Che2.6a	Pseudomonas huaxiensis WCHPs060044	0
Che2.6b	Pseudomonas sp. CP080030	0
Che2.7a	Pseudomonas sp. GH1-PS26	0
Che2.7b	Pseudomonas sp. CP080030	0
Che2.8a	Pseudomonas sp. RU47	0
Che2.8b	Pseudomonas sp. CP080030	0
Che2.9a	Pseudomonadaceae bacterium T75	0
Che2.9b	Pseudomonas sp. CP080030	0
Che2.10b	Pseudomonas sp. GH1-PS26	0
Che2.11a	Pseudomonas fluorescens NCIMB 11764	0
Che2.11b	Pseudomonas sp. CP080030	0
Che2.12a	Pseudomonas fluorescens LBUM570	0
Che2.12b	Pseudomonas sp. Y39-6	0
Che2.13a	Pseudomonas sp. B16-156	0
Che2.13b	Stenotrophomonas sp. PA118	0
Che2.14a	Pseudomonas fluorescens LBUM570	0
Che2.14b	Stenotrophomonas sp. PA118	0
Che2.15a	Pseudomonas jessenii DSM 17150T	0
Che2.15b	Pseudomonas sp. CP080030	0
Che2.16a	Pseudomonas jessenii DSM 17150T	0
Che2.16b	Pseudomonas sp. GH1-PS26	0
Che2.17a	Pseudomonas sp. NIBR-H-19	0
Che2.17b	Stenotrophomonas sp. PA118	0
Che2.18a	Pseudomonas sp. S34	0
Che2.18b	Pseudomonas sp. CP080030	0
Che2.19a	Pseudomonas sp. S34	0
Che2.19b	Pseudomonas sp. Y39-6	0
Che2.20a	Pseudomonas frederiksbergensis DSM 13022T	0
Che2.20b	Pseudomonas sp. GH1-PS26	0
Che3.1a	Pseudomonas brassicacearum B21-016	0
Che3.1b	Pseudomonas sp. st105	0
Che3.2a	Pseudomonas sp. B21-017	0
Che3.2b	Pseudomonas fluorescens NCIMB 11764	0
Che3.3a	Pseudomonas jessenii DSM 17150T	0
Che3.3b	Burkholderia anthina BJQ0011	0
Che3.4a	Pseudomonas sp. S34	0
Che3.4b	Stenotrophomonas sp. PA118	0
Che3.5a	Pseudomonas brassicacearum B21-016	0
Che3.5b	Pseudomonas sp. IB-1.1	0
Che3.6a	Pseudomonas sp. MHGNU B109	0
Che3.6b	Pseudomonas fluorescens NCIMB 11764	0
Che3.7a	Pseudomonas sp. S34	0
Che3.7b	Pseudomonas sp. Y39-6	0
Che3.8a	Pseudomonas frederiksbergensis DSM 13022T	0
Che3.8b	Pseudomonas fluorescens NCIMB 11764	0
Che3.9a	Pseudomonas fluorescens strain LBUM570	0
Che3.9b	Pseudomonas fluorescens NCIMB 11764	0
Che3.10a	Pseudomonas huaxiensis WCHPs060044	0
Che3.10b	Pseudomonas sp. Y39-6	0
Che3.11a	Pseudomonas sp. S34	0
Che3.11b	Pseudomonas sp. IB-1.1	0
Che3.12a	Pseudomonas jessenii DSM 17150T	0
Che3.12b	Pseudomonas sp. Y39-6	0
Che3.13a	Pseudomonas marginalis HRI 95	0
Che3.13b	Pseudomonas fluorescens NCIMB 11764	0
Che3.14a	Pseudomonas huaxiensis WCHPs060044	0
Che3.14b	Pseudomonas sp. Y39-6	0
Che3.15a	Pseudomonas sp. S34	0
Che3.15b	Burkholderia anthina BJQ0011	0
Che3.16a	Brucella intermedia TSBOI	0
Che3.16b	Pseudomonas sp. Y39-6	0
Che3.17a	Pseudomonas sp. NIBR-H-19	0
Che3.17b	Pseudomonas sp. st105	0
Che3.18a	Pseudomonas sp. NIBR-H-19	0
Che3.18b	Pseudomonas sp. Y39-6	0
Che3.19a	Pseudomonas sp. FP2196	0
Che3.19b	Pseudomonas sp. GH1-PS44	0
Che3.20a	Pseudomonas sp. MPC6	0
Che3.20b	Pseudomonas mandelii JR-1	0
S1.1a	Bordetella petrii DSM 12804	0
S1.1b	Pseudomonas sp. FP1154	0
S1.2a	Pseudomonas sp. MPC6	0
S1.3a	Pseudomonas fluorescens NCIMB 11764	0
S1.4a	Pseudomonas sp. P108	0
S1.5a	Pseudomonas fluorescens G7	6.39e-73
S1.5b	Pseudomonas sp. PP3	0
S1.6a	Pseudomonas sp. PP3	0
S1.7a	Pseudomonas sp. B21-019	0
S1.7b	Pseudomonas sp. B21-019	0
S1.8a	Pseudomonas sp. P108	0
S1.9a	Pseudomonas sp. B21-028	0
S1.10a	Pseudomonas tensinigenes ZA 5.3	0
S1.11a	Pseudomonas moorei RW10T	0
S1.12a	Pseudomonas fluorescens 11764	0
S1.13a	Pseudomonas sp. FP453	0
S1.14b	Pseudomonas sp. FP453	0
S1.18b	Pseudomonas fluorescens NCIMB 11764	0
S1.19b	Pseudomonas sp. Cam-1	0
S2.15b	Pseudomonas sp. B16-156	0
S2.18b	Pseudomonas sp. FP453	0
S2.1b	Pseudomonas sp. GH1-PS23	0
S2.2b	Pseudomonas sp. TLC13:6-6.5cm-2G	0
S2.8b	Pseudomonas sp. JR1	0
S2.9b	Pseudomonas sp. Cam-1	0
S3.4b	Pseudomonas azerbaijanorientalis SWRI123	0
S3.9b	Burkholderia anthina BJQ0011	0
S3.10b	Pseudomonas sp. JR1	0
S3.13b	Pseudomonas sp. Cam-1	0
S3.15b	Pseudomonas azerbaijanorientalis SWRI123	0
S3.18b	Burkholderia anthina BJQ0011	0
Ti1.1a	Pseudomonas sp. FP821	0
Ti1.1b	Pseudomonas sp. CP080030	0
Ti1.2a	Pseudomonas sp. FP821	0
Ti1.2b	Pseudomonas sp. JR1	0
Ti1.3a	Pseudomonas sp. FP821	0
Ti1.3b	Pseudomonas sp. PIA16	0
Ti1.4a	Pseudomonas sp. FP821	0
Ti1.4b	Pseudomonas sp. CP080030	0
Ti1.5a	Pseudomonas sp. FP821	0
Ti1.5b	Pseudomonas sp. CP080030	0
Ti1.6a	Pseudomonas sp. FP821	0
Ti1.6b	Pseudomonas sp. CP080030	0
Ti1.7a	Pseudomonas sp. FP821	0
Ti1.7b	Pseudomonas sp. CP080030	0
Ti1.8a	Pseudomonas sp. FP821	0
Ti1.8b	Pseudomonas sp. CP080030	0
Ti1.9a	Pseudomonas sp. CCUG 64384	0
Ti1.9b	Pseudomonas sp. CP080030	0
Ti1.10a	Pseudomonas mandelii JR-1	0
Ti1.10b	Pseudomonas sp. CP080030	0
Ti1.11a	Pseudomonas sp. FP821	0
Ti1.11b	Pseudomonas azerbaijanorientalis SWRI123	0
Ti1.12a	Pseudomonas sp. FP821	0
Ti1.12b	Pseudomonas sp. CP080030	0
Ti1.13a	Pseudomonas sp. FP821	0
Ti1.13b	Pseudomonas sp. CP080030	0
Ti1.14a	Pseudomonas mandelii JR-1	0
Ti1.14b	Pseudomonas moorei RW10T	0
Ti1.15a	Pseudomonas sp. FP821	0
Ti1.15b	Pseudomonas sp. CP080030	0
Ti1.16a	Pseudomonas mandelii JR-1	0
Ti1.16b	Pseudomonas sp. CP080030	0
Ti1.17a	Pseudomonas sp. FP821	0
Ti1.17b	Pseudomonas sp. CP080030	0
Ti1.18a	Pseudomonas sp. FP821	0
Ti1.18b	Pseudomonas sp. CP080030	0
Ti1.19a	Agrobacterium tumefaciens CFBP5506	0
Ti1.19b	Pseudomonas sp. CP080030	0
Ti1.20a	Agrobacterium tumefaciens CFBP5506	0
Ti2.1a	Pseudomonas sp. GH1-PS23	0
Ti2.1b	Pseudomonas azerbaijanorientalis SWRI123	0
Ti2.2a	Pseudomonas frederiksbergensis DSM 13022T	0
Ti2.2b	Pseudomonas migulae 8R6	0
Ti2.3a	Pseudomonas sp. S34	0
Ti2.3b	Pseudomonas azerbaijanorientalis SWRI123	0
Ti2.4a	Pseudomonas zarinae SWRI108	0
Ti2.4b	Pseudomonas moorei RW10T	0
Ti2.5a	Pseudomonas frederiksbergensis DSM 13022T	0
Ti2.5b	Pseudomonas sp. FP453	0
Ti2.6a	Pseudomonas zarinae SWRI108	0
Ti2.6b	Pseudomonas fluorescens NCIMB 11764	0
Ti2.7a	Pseudomonas sp. FP453	0
Ti2.7b	Pseudomonas azerbaijanorientalis SWRI123	0
Ti2.8a	Pseudomonas putida ZXPA-20	0
Ti2.8b	Pseudomonas azerbaijanorientalis SWRI123	0
Ti2.9a	Pseudomonas sp. FP453	0
Ti2.9b	Pseudomonas moorei RW10T	0
Ti2.10a	Pseudomonas sp. FP1154	0
Ti2.10b	Pseudomonas migulae 8R6	0
Ti2.11a	Pseudomonas sp. FP1154	0
Ti2.11b	Pseudomonas fluorescens NCIMB 11764	0
Ti2.12a	Pseudomonas sp. FP1154	0
Ti2.12b	Pseudomonas sp. FP453	0
Ti2.13a	Pseudomonas sp. S34	0
Ti2.13b	Pseudomonas sp. CP080030	0
Ti2.14a	Pseudomonas sp. FP1154	0
Ti2.14b	Pseudomonas moorei RW10T	0
Ti2.15a	Pseudomonas sp. S34	0
Ti2.15b	Pseudomonas mohnii IpA-2T	0
Ti2.16a	Pseudomonas sp. FP1154	0
Ti2.16b	Pseudomonas moorei RW10T	0
Ti2.17a	Pseudomonas sp. FP1154	0
Ti2.17b	Pseudomonas migulae 8R6	0
Ti2.18a	Pseudomonas moorei RW10T	0
Ti2.18b	Pseudomonas sp. S34	0
Ti2.19a	Pseudomonas moorei RW10T	0
Ti2.19b	Pseudomonas frederiksbergensis DSM 13022T	0
Ti2.20a	Pseudomonas migulae 8R6	0
Ti2.20b	Brucella anthropi MWF001	0
Ti3.1a	Pseudomonas sp. CCUG 64384	0
Ti3.1b	Pseudomonas sp. FP1154	0
Ti3.2a	Pseudomonas sp. GH1-PS26	0
Ti3.2b	Pseudomonas jessenii DSM 17150T	0
Ti3.3a	Pseudomonas sp. CCUG 64384	0
Ti3.3b	Pseudomonas graminis PgKB30	0
Ti3.4a	Pseudomonas sp. CCUG 64384	0
Ti3.4b	Pseudomonas jessenii DSM 17150T	0
Ti3.5a	Pseudomonas frederiksbergensis DSM 13022T	0
Ti3.5b	Brucella anthropi MWF001	0
Ti3.6a	Pseudomonas sp. JR1	0
TI3.6b	Brucella intermedia DW0551	0
Ti3.7a	Pseudomonas mohnii	0
Ti3.7b	Pseudomonas jessenii DSM 17150T	0
Ti3.8a	Pseudomonas sp. GH1-PS26	0
Ti3.8b	Pseudomonas citronellolis P3B5	0
Ti3.9a	Pseudomonas sp. GH1-PS26	0
Ti3.9b	Pseudomonas jessenii DSM 17150T	0
Ti3.10a	Pseudomonas sp. CCUG 64384	0
Ti3.10b	Pseudomonas frederiksbergensis DSM 13022T	0
Ti3.11a	Pseudomonas sp. CCUG 64384	0
Ti3.11b	Pseudomonas jessenii DSM 17150T	0
Ti3.12a	Pseudomonas abietaniphila ATCC 700689T	0
Ti3.12b	Pseudomonas jessenii DSM 17150T	0
Ti3.13a	Pseudomonas sp. CCUG 64384	0
Ti3.13b	Pseudomonas izuensis	0
Ti3.14a	Pseudomonas fluorescens NCIMB 11764	0
Ti3.14b	Pseudomonas frederiksbergensis DSM 13022T	0
Ti3.15a	Pseudomonas sp. CCUG 64384	0
Ti3.15b	Pseudomonas sp. GH1-PS23	0
Ti3.16a	Pseudomonas sp. CCUG 64384	0
Ti3.16b	Brucella sp. MAB-22	0
Ti3.17a	Pseudomonas sp. CCUG 64384	1.52e-83
Ti3.17b	Pseudomonas jessenii DSM 17150T	0
Ti3.18a	Pseudomonas azerbaijanorientalis SWRI123	0
Ti3.18b	Pseudomonas graminis PgKB30	0
Ti3.19a	Pseudomonas tensinigenes ZA 5.3	0
Ti3.19b	Pseudomonas izuensis	0
Ti3.20a	Pseudomonas sp. CCUG 64384	0
Ti3.20b	Pseudomonas sp. CCUG 64384	0
