# Supplementary material for: The genotype of barley cultivars influences multiple aspects of their associated microbiota via differential root exudate secretion
Source: PLoS Biol. 2024 Apr 25;22(4):e3002232. doi: 10.1371/journal.pbio.3002232 (PMC11045101; doi:10.1371/journal.pbio.3002232)
Supplement: S3 Data — (XLSX) [file pbio.3002232.s018.xlsx]

## Sheet: A
	Chevallier 2 dpi			Chevallier 5 dpi			Chevallier 7 dpi			Tipple 2 dpi			Tipple 5 dpi			Tipple 7 dpi
Fructose	91.005	53.664	119.55	60.45	64.358	166.368	84.151	79.934	114.917	141.836	548.986	359.349	131.219	219.985	173.728	142.013	129.631	131.499
C4-dicarboxylates	103.448	219.149	101.772	378.097	55.773	79.461	85.995	52.281	46.053	76.286	86.586	83.359	125.951	69.983	64.964	88.556	107.738	155.548
Sucrose	37.463	284.873	16.51	38.842	116.952	85.381	43.593	83.429	85.529	275.392	301.921	64.918	311.021	203.227	79.101	46.291	199.86	73.022
Phenylalanine	104.784	109.647	91.75	110.155	65.773	93.486	102.109	60.658	105.825	106.086	86.315	62.357	190.558	184.844	130.43	214.403	150.398	88.395

## Sheet: B
		log 2 normalised abundance
ID in heatmap	GC-MS detected entities	Chevallier			Tipple
1	L-sorbose 1	0.203739	-0.443933	7.73834	-0.0555158	-0.694985	0.0555158
2	GABA	-14.6254	-14.4386	-0.381737	0.847788	0.381737	0.69355
3	Malonic acid	-6.56335	-6.37652	23.4651	6.37652	-7.82034	6.8949
4	Glycolic acid	-6.31457	-6.12774	7.92914	-6.8958	6.12774	6.38933
5	Citric acid	1.01589	0.55316	12.136	-0.55316	-1.24599	-0.593067
6	Phosphoric acid 1	-6.15006	-5.96323	8.09365	-6.7313	5.96323	6.98799
7		-0.0934153	0.0934162	14.1503	-0.674647	-1.3504	12.6427
8	L-allothreonine	-0.0934153	0.0934162	14.1503	-0.674647	-1.3504	12.8948
9	1,6-anhydro-glucose	-0.0934153	0.0934162	14.1503	-0.674647	-1.3504	12.3584
10	L-(+) Lactic acid	0.0899572	-0.541599	11.32	-0.305629	-0.0899572	0.34886
11	L-glutamic acid 1	-6.7639	8.37185	7.47981	-7.34513	-8.02088	6.7639
12	3-Phenyllactic acid	0.902123	-14.6351	-0.578201	0.578201	0.612798	-3.0968
13	D-allose	-14.1379	-0.105762	0.105762	1.01939	-0.585446	1.61974
14	Palmitic acid	0.709947	0.524373	14.2776	-0.524373	-1.56515	-1.81001
15	Beta-alanine	0.261425	0.599185	13.308	-0.261425	-1.07647	-1.70021
16	Ribitol	-7.21527	-7.02844	7.02844	-7.7965	7.34155	8.48852
17	Arabitol	-0.0934153	0.0934162	14.1503	-0.674647	-1.3504	12.1235
18	L-alanine	-13.9697	-13.7829	0.273983	-0.273983	0.401564	0.872263
19	Conduritol epoxide	1.06063	0.0715475	-0.0715475	-14.8965	-1.24202	0.896953
20	Gluconic acid	-0.0934153	0.0934162	14.1503	-0.674647	-1.3504	12.4504
21	Oxalic acid	0.869537	0.458079	14.4897	-0.458079	-1.22674	-1.92206
22	D-threitol	-7.21527	-7.02844	7.02844	-7.7965	9.215	7.02844
23	D-glucose	-7.21527	-7.02844	7.02844	-7.7965	11.1503	9.81249
24	Myo-Inositol	-0.0934153	0.0934162	14.1503	-0.674647	-1.3504	11.4829
25	Eicosapentaenoic acid	-0.809401	-0.151527	-3.35028	0.209192	0.151527	0.18915
26	D-mannose	2.32466	1.38515	-1.38081	-1.38081	-16.8815	1.38081
27	L- sorbose 2	2.93261	-16.3473	-2.29038	-17.1153	2.29038	3.02051
28	L-serine	0.745816	0.531317	0.327106	-14.4978	-0.875069	-0.327106
29	Petunidin-3-glucoside	-0.222477	-13.5088	0.548062	0.222477	-0.276366	0.758756
30	3,4-MDEA	-6.99742	-6.81059	7.24629	-7.57865	7.28969	6.81059
31	Acetohydroxamic acid	0.0381522	0.24822	14.801	-0.0381522	-1.05158	-1.09866
32	Pelargonic acid	0.713271	0.344825	14.9159	-0.344825	-0.830768	-1.236
33	Glycine	0.551961	0.551961	0.551961	-14.273	-0.970413	-0.551961
34	Succinic acid	-0.00920677	-0.34595	12.8282	0.00920677	-0.540102	0.0833502
35	Ethanolamine	0.329711	0.459709	14.6456	-0.329711	-1.12955	-1.61343
36	Tris(trimethylsilyl) phosphate	1.43722	-21.8195	-7.76266	0.992015	-0.329081	0.329081
37	Fumaric acid	-6.72341	-6.53658	7.5203	6.53658	-7.9804	6.85276
38	4-Methylpentyl ethylphosphonofluoridate	-0.0934153	0.0934162	14.1503	-0.674647	-1.3504	11.6077
39	Carboxylic Acid	0.158456	0.124795	13.4337	-0.782562	-1.33464	-0.124795
40	Norvaline	1.38416	-14.2649	15.5839	0.640986	-15.7088	-0.640986
41	Propanamine	-7.21527	-7.02844	7.02844	-7.7965	8.72515	8.80783
42	Methylmalonic acid	-0.0934153	0.0934162	14.1503	-0.674647	-1.3504	12.4188
43	D-malic acid	0.348846	-0.440816	10.8873	0.210769	-0.901913	-0.210769
44	6-hydroxy caproic acid	-0.0934153	0.0934162	14.1503	-0.674647	-1.3504	12.5267
45	Glyceric acid	0.792374	0.95284	0.110169	-1.00578	-0.875961	-0.110169
46	D-sphingosine	0.326963	0.621605	13.279	-0.326963	-1.60301	-1.19141
47	Digalacturonic acid	-0.00434685	-14.0525	0.00434685	0.392347	-0.149131	0.254244
48	Caprylic acid	-0.0934153	0.0934162	14.1503	-0.674647	12.7976	-1.97143
49	D-erythrose-4-phosphate	-0.0934153	0.0934162	14.1503	-0.674647	13.6679	-1.97143
50	Acetylisatin	6.87741	-6.87741	7.17947	-7.64547	8.37139	-8.94225
51	Pipecolic acid	-0.0934153	0.0934162	14.1503	-0.674647	13.445	-1.97143
52	D (+) galactose	-6.78149	8.23124	7.46222	-7.36273	6.78149	-8.65951
53	Sedoheptulose	14.3912	0.384031	14.4409	-0.384032	-1.05979	-1.68081
54	Tert-butyl isocyanate	13.7192	0.384031	14.4409	-0.384032	-1.05979	-1.68081
55	Phosphoric acid 2	12.0687	11.956	25.3967	-11.956	-12.6317	-13.2527
56	L-glutamic acid 2	8.31627	7.90215	7.41247	-7.41247	-8.08823	-8.70925
57	Sarcosine	-0.0934153	0.0934162	14.1503	13.3131	-1.3504	-1.97143
58	Allo-inositol	-0.0934153	0.0934162	14.1503	13.3416	-1.3504	-1.97143
59	m-toluic acid	0.290616	15.6076	14.5343	-0.290616	-0.966372	-1.5874
60	73.1@9.9	-0.0934153	0.0934162	14.1503	-0.674647	21.7534	-1.97143
61	212.0@9.897	11.5558	-7.02844	7.02844	-7.7965	11.3512	-9.09328
62	190.0@9.8935	8.7323	-7.02844	7.02844	11.5583	-8.47226	-9.09328
63	205.0@9.895	10.875	-7.02844	7.02844	-7.7965	-8.47226	10.0433
64	205.1@9.895	10.8751	-7.02844	7.02844	-7.7965	-8.47226	9.84301
65	73.1@11.712999	-7.15779	-6.97096	7.08592	9.06916	-8.41478	6.97096
66	73.0@11.712999	-7.21527	-7.02844	7.02844	9.00164	-8.47226	7.07139
67	56.0@6.994	0.290616	0.477448	31.2243	-0.290616	-0.966372	-1.5874
68	73.0@26.261332	-7.67729	7.67729	20.7425	-8.25852	7.73593	-9.55531
69	361.0@23.788	0.290616	16.7321	14.5343	-0.290616	-0.966372	-1.5874
70	187.0@12.535167	0.497589	0.246742	14.274	-1.42833	-0.246742	-0.917581
71	187.0@12.5346	0.505841	0.254162	14.2607	-15.8	-0.254162	-0.885713
72	73.0@17.144	0.290616	16.3118	14.5343	-0.290616	-0.966372	-1.5874
73	73.0@12.5355	-6.75889	9.134	7.48482	6.75889	-8.01588	-8.6369
74	97.4@12.529	0.290616	16.1796	14.5343	-0.290616	-0.966372	-1.5874
75	72.0@9.8755	-6.52159	9.32254	7.72212	6.52159	-7.77858	-8.3996
76	166.9@9.888	0.290616	0.477448	30.0821	-0.290616	-0.966372	-1.5874
77	239.1@11.8304	-13.869	1.83832	14.9446	-0.379104	0.379104	-1.23678
78	239.1@11.83025	-13.438	2.26282	15.3753	-14.0192	0.805737	-0.805737
79	73.0@8.491	0.290616	15.8693	14.5343	-0.290616	-0.966372	-1.5874
80	72.1@9.8755	-6.52158	9.00366	7.72213	6.52158	-7.77857	-8.39959
81	73.1@16.929	15.3407	0.384031	14.4409	-0.384032	-1.05979	-1.68081
82	73.1@15.908	-0.0934153	0.0934162	14.1503	14.2625	-1.3504	-1.97143
83	73.0@15.804	-0.0934153	0.0934162	14.1503	-0.674647	-1.3504	12.9203
84	73.1@15.804	-0.0934153	0.0934162	14.1503	-0.674647	-1.3504	12.8534
85	73.0@15.899	-0.0934153	0.0934162	14.1503	14.0493	-1.3504	-1.97143
86	347.0@16.517	-0.0934153	0.0934162	14.1503	14.004	-1.3504	-1.97143
87	73.1@22.744	-0.0934153	0.0934162	14.1503	-0.674647	-1.3504	12.6294
88	73.1@22.738	-0.0934153	0.0934162	14.1503	-0.674647	-1.3504	12.4816
89	73.0@16.093	-0.0934153	0.0934162	14.1503	-0.674647	-1.3504	12.4662
90	72.0@9.938	-0.0934153	0.0934162	14.1503	-0.674647	-1.3504	12.3255
91	465.1@16.519	-0.0934153	0.0934162	14.1503	13.5051	-1.3504	-1.97143
92	271.1@23.789	0.290616	14.6496	14.5343	-0.290616	-0.966372	-1.5874
93	147.0@23.798:2	0.290616	0.477448	28.6319	-0.290616	-0.966372	-1.5874
94	73.0@18.362	14.2641	0.384031	14.4409	-0.384032	-1.05979	-1.68081
95	73.1@18.362	14.2639	0.384031	14.4409	-0.384032	-1.05979	-1.68081
96	73.0@26.274	0.290616	0.477448	28.5536	-0.290616	-0.966372	-1.5874
97	377.1@16.517	0.290616	14.4445	14.5343	-0.290616	-0.966372	-1.5874
98	73.0@16.202	-0.0934153	0.0934162	14.1503	-0.674647	-1.3504	11.9695
99	73.1@16.202	-0.0934153	0.0934162	14.1503	-0.674647	-1.3504	11.8508
100	73.0@22.744	-0.0934153	0.0934162	14.1503	-0.674647	-1.3504	11.6049
101	147.0@10.093:1	-0.0934153	0.0934162	14.1503	-0.674647	-1.3504	11.4609
102	451.1@23.798	0.290616	0.477448	27.9428	-0.290616	-0.966372	-1.5874
103	242.0@15.417	-0.0934153	0.0934162	14.1503	12.7316	-1.3504	-1.97143
104	73.0@24.705	-0.0934153	0.0934162	14.1503	12.6793	-1.3504	-1.97143
105	147.0@10.093:2	-0.0934153	0.0934162	14.1503	-0.674647	-1.3504	11.3763
