# Supplementary material for: The genotype of barley cultivars influences multiple aspects of their associated microbiota via differential root exudate secretion
Source: PLoS Biol. 2024 Apr 25;22(4):e3002232. doi: 10.1371/journal.pbio.3002232 (PMC11045101; doi:10.1371/journal.pbio.3002232)
Supplement: S4 Data — (XLSX) [file pbio.3002232.s019.xlsx]

## Sheet: A
time (h)	Che1.1	Che1.2	Che1.3	Che1.4	Che1.5	Che1.6	Che1.7	Che1.8	Che1.9	Che1.10	Che1.11	Che1.12	Che1.13	Che1.14	Che1.15	Che1.16	Che1.17	Che1.18	Che1.19	Che1.20	Che2.1	Che2.2	Che2.3	Che2.4	Che.2.5	Che.2.6	Che.2.7	Che.2.8	Che.2.9	Che.2.10	Che2.11	Che2.12	Che2.13	Che2.14	Che2.15	Che2.16	Che2.17	Che2.18	Che2.19	Che2.20	Che3.1	Che3.2	Che3.3	Che3.4	Che3.5	Che3.6	Che3.7	Che3.8	Che3.9
0	0.042	0.044	0.028	0.023	0.026	0.024	0.008	0.001	0.001	0.002	0.01	0.005	0.034	0.026	0.018	0.021	0.012	0.03	0.002	0	0.14	0.003	0.003	0.004	0.035	0.028	0.023	0.025	0.03	0.023	0.003	0.002	0.001	0.003	0.002	0.002	0.028	0.017	0.017	0.017	0.025	0.018	0.001	0.001	0	0.003	0.003	0.001	0.024
1	0.01	0.017	0.002	0.003	0.003	0.001	0.006	0.001	0	0.001	0.007	0.007	0.008	0.002	0.001	0.001	0	0.002	0.002	0.058	0.13	0.002	0.003	0.002	0.005	0.003	0.001	0.001	0.002	0.002	0.002	0.002	0.001	0.003	0.001	0.002	0.002	0	0.001	0.001	0.002	0.002	0	0	0.012	0.001	0.001	0	0.002
2	0.008	0.011	0.001	0	0	0	0.002	0	0.001	0	0.018	0.01	0.004	0.001	0	0	0	0	0	0.063	0.096	0	0	0.001	0.001	0.003	0	0	0	0	0	0	0	0	0	0	0	0	0	0	0	0	0	0	0.017	0	0	0	0
3	0.007	0.01	0.005	0.001	0.003	0.001	0.003	0.001	0.002	0.002	0.014	0.014	0.005	0.002	0.002	0.003	0.001	0.004	0.002	0.066	0.1	0.003	0.003	0.003	0.002	0.004	0.005	0.003	0.005	0.001	0.001	0.002	0.002	0.002	0.001	0.003	0.002	0.005	0.001	0.003	0.005	0.002	0.002	0.002	0.02	0.001	0.003	0.001	0.002
4	0.008	0.009	0.005	0	0.003	0.002	0.002	0.001	0.001	0.002	0.025	0.02	0.012	0.001	0.002	0.003	0.002	0.005	0.001	0.064	0.119	0.002	0.002	0.001	0.001	0	0.007	0.005	0.001	0.004	0.001	0.001	0.002	0.001	0.001	0.006	0.004	0.007	0.003	0.004	0.005	0.006	0.003	0.004	0.021	0.001	0.002	0.002	0.006
5	0.008	0.008	0.001	0.001	0.005	0.004	0.002	0	0.002	0.001	0.009	0.019	0.003	0.002	0.003	0.004	0.004	0.008	0.001	0.064	0.109	0.004	0.004	0.002	0	0.004	0.009	0.008	0.008	0.002	0.001	0.002	0.002	0.002	0.003	0.009	0.007	0.01	0.004	0.001	0.013	0	0.003	0.007	0.02	0.001	0.003	0.004	0.01
6	0.01	0.007	0	0.004	0.007	0.005	0.001	0	0.001	0.003	0.011	0.003	0	0.005	0.004	0.005	0.005	0.011	0.001	0.063	0.064	0.003	0.005	0.001	0.001	0.013	0.009	0.009	0.014	0.002	0.002	0.003	0.005	0.001	0.007	0.01	0.005	0.015	0.004	0.01	0.014	0	0.004	0.013	0.021	0.002	0.006	0.006	0.017
7	0.011	0.005	0.003	0.004	0.007	0.005	0	0	0	0.002	0.003	0	0.002	0.004	0.003	0.005	0.008	0.011	0.001	0.062	0.026	0.002	0.009	0	0.005	0.017	0.012	0.011	0.026	0.004	0.002	0.003	0.007	0.002	0.009	0.011	0.007	0.016	0.006	0.013	0.023	0.001	0.004	0.017	0.019	0.002	0.008	0.007	0.025
8	0.016	0	0.009	0.004	0.008	0.004	0	0.002	0	0.004	0.007	0.002	0.002	0.002	0	0.004	0.01	0.007	0.002	0.063	0.001	0.005	0.013	0.002	0.015	0.011	0.013	0.014	0.042	0.005	0.006	0.004	0.009	0.004	0.013	0.013	0.015	0.012	0.005	0.015	0.035	0.008	0.006	0.023	0.02	0.004	0.012	0.01	0.032
9	0.017	0.002	0.003	0.012	0.012	0.007	0.001	0.004	0.001	0.005	0	0.003	0.005	0.002	0.003	0.004	0.016	0.009	0.003	0.065	0.002	0.007	0.017	0.003	0.009	0.022	0.016	0.021	0.055	0.014	0.013	0.008	0.012	0.006	0.014	0.015	0.016	0.008	0.008	0.02	0.055	0.023	0.008	0.025	0.021	0.003	0.015	0.01	0.044
10	0	0.007	0.012	0.001	0.011	0.008	0.002	0.007	0.002	0.007	0.005	0.008	0.006	0.008	0.003	0.005	0.015	0.014	0.001	0.067	0.001	0.008	0.019	0.004	0.004	0.017	0.019	0.023	0.066	0.019	0.028	0.01	0.018	0.005	0.018	0.016	0.013	0.012	0.008	0.025	0.069	0.026	0.011	0.026	0.021	0.003	0.019	0.013	0.052
11	0.001	0.013	0.017	0.004	0.013	0.009	0.001	0.008	0.001	0.008	0.012	0.019	0.009	0.009	0.004	0.012	0.013	0.008	0	0.072	0	0.009	0.02	0.004	0.002	0.031	0.021	0.027	0.076	0.013	0.021	0.014	0.022	0.005	0.02	0.018	0.006	0.015	0.009	0.029	0.082	0.017	0.012	0.026	0.021	0.003	0.021	0.02	0.06
12	0.004	0.016	0.026	0.005	0.023	0.01	0.001	0.022	0.001	0.011	0.008	0.028	0.019	0.001	0.01	0.008	0.019	0.015	0.002	0.071	0.002	0.011	0.027	0.006	0.007	0.04	0.027	0.036	0.088	0.019	0.03	0.03	0.031	0.009	0.025	0.025	0.012	0.02	0.012	0.039	0.095	0.036	0.016	0.028	0.023	0.005	0.025	0.025	0.06
13	0.008	0.023	0.033	0.011	0.032	0.011	0.001	0.032	0.002	0.013	0.014	0.027	0.027	0	0.008	0.006	0.031	0.019	0.002	0.075	0.002	0.013	0.033	0.008	0.014	0.053	0.031	0.038	0.095	0.033	0.034	0.039	0.04	0.011	0.028	0.029	0.018	0.023	0.016	0.043	0.104	0.049	0.019	0.025	0.023	0.003	0.027	0.029	0.075
14	0.015	0.026	0.037	0.014	0.045	0.01	0.002	0.039	0.002	0.024	0.011	0.036	0.024	0.002	0.005	0.008	0.039	0.028	0.002	0.076	0.002	0.014	0.035	0.009	0.025	0.064	0.036	0.046	0.102	0.05	0.043	0.042	0.055	0.014	0.033	0.032	0.029	0.026	0.024	0.058	0.114	0.069	0.025	0.026	0.024	0.003	0.034	0.033	0.075
15	0.027	0.035	0.04	0.022	0.053	0.012	0.004	0.053	0.002	0.019	0.012	0.034	0.038	0.008	0.007	0.014	0.04	0.042	0.004	0.079	0.002	0.016	0.041	0.011	0.036	0.082	0.043	0.054	0.107	0.063	0.057	0.045	0.074	0.023	0.037	0.038	0.043	0.03	0.036	0.07	0.127	0.085	0.032	0.032	0.024	0.003	0.038	0.039	0.092
16	0.042	0.05	0.044	0.035	0.06	0.012	0.002	0.064	0.001	0.027	0.011	0.056	0.045	0.019	0.013	0.022	0.056	0.055	0.001	0.081	0.001	0.017	0.042	0.017	0.053	0.102	0.044	0.06	0.111	0.079	0.06	0.042	0.088	0.016	0.037	0.038	0.06	0.035	0.053	0.074	0.135	0.095	0.026	0.034	0.025	0	0.04	0.042	0.092
17	0.058	0.062	0.046	0.047	0.081	0.014	0.003	0.062	0.002	0.038	0.008	0.065	0.059	0.033	0.018	0.025	0.066	0.077	0.001	0.081	0.001	0.021	0.047	0.018	0.067	0.12	0.049	0.067	0.115	0.093	0.066	0.05	0.108	0.017	0.044	0.042	0.077	0.038	0.07	0.079	0.141	0.108	0.03	0.043	0.029	0.003	0.048	0.049	0.096
18	0.073	0.063	0.052	0.079	0.105	0.015	0.003	0.075	0.002	0.044	0.011	0.073	0.088	0.051	0.031	0.043	0.089	0.103	0.002	0.088	0.002	0.023	0.053	0.02	0.085	0.147	0.052	0.075	0.12	0.097	0.069	0.057	0.13	0.023	0.049	0.048	0.104	0.044	0.1	0.108	0.15	0.117	0.035	0.049	0.031	0.004	0.054	0.055	0.114
19	0.097	0.074	0.055	0.096	0.112	0.017	0.005	0.081	0.003	0.051	0.015	0.076	0.095	0.069	0.046	0.057	0.106	0.125	0.003	0.103	0.003	0.026	0.062	0.031	0.099	0.17	0.055	0.089	0.126	0.112	0.076	0.064	0.125	0.028	0.056	0.054	0.119	0.048	0.12	0.127	0.162	0.128	0.04	0.052	0.035	0.005	0.06	0.061	0.118
20	0.131	0.078	0.063	0.12	0.121	0.017	0.005	0.095	0.003	0.062	0.009	0.096	0.087	0.092	0.067	0.073	0.102	0.139	0.002	0.1	0.003	0.029	0.068	0.045	0.12	0.195	0.059	0.099	0.133	0.12	0.084	0.069	0.15	0.039	0.064	0.059	0.147	0.051	0.153	0.139	0.165	0.126	0.046	0.067	0.039	0.007	0.067	0.067	0.134
21	0.137	0.086	0.074	0.148	0.12	0.016	0.006	0.096	0.003	0.067	0.013	0.103	0.116	0.106	0.089	0.088	0.104	0.175	0.002	0.113	0.003	0.035	0.078	0.059	0.13	0.219	0.065	0.107	0.136	0.137	0.075	0.076	0.149	0.051	0.07	0.064	0.148	0.056	0.175	0.157	0.172	0.135	0.051	0.073	0.043	0.007	0.074	0.073	0.138
22	0.155	0.1	0.079	0.18	0.122	0.018	0.005	0.084	0.002	0.075	0.013	0.116	0.113	0.125	0.098	0.109	0.11	0.201	0.003	0.115	0.003	0.038	0.083	0.08	0.169	0.248	0.065	0.112	0.141	0.153	0.079	0.086	0.173	0.068	0.075	0.07	0.162	0.06	0.197	0.163	0.179	0.137	0.054	0.076	0.046	0.006	0.08	0.076	0.134
23	0.159	0.104	0.081	0.205	0.137	0.02	0.007	0.094	0.003	0.087	0.01	0.134	0.122	0.147	0.133	0.138	0.113	0.233	0.002	0.122	0.003	0.048	0.087	0.102	0.158	0.275	0.069	0.115	0.144	0.153	0.082	0.093	0.174	0.086	0.083	0.075	0.163	0.065	0.217	0.171	0.183	0.142	0.058	0.084	0.051	0.007	0.087	0.083	0.148
24	0.169	0.104	0.089	0.217	0.145	0.022	0.007	0.089	0.002	0.095	0.011	0.144	0.107	0.172	0.153	0.162	0.117	0.234	0.002	0.126	0.003	0.061	0.092	0.127	0.167	0.298	0.083	0.117	0.15	0.156	0.089	0.098	0.19	0.108	0.09	0.082	0.164	0.069	0.224	0.184	0.192	0.143	0.062	0.092	0.056	0.009	0.093	0.089	0.138
25	0.156	0.103	0.1	0.229	0.151	0.023	0.01	0.09	0.003	0.102	0.009	0.156	0.126	0.164	0.17	0.19	0.126	0.244	0.002	0.137	0.003	0.076	0.099	0.159	0.176	0.309	0.075	0.124	0.155	0.168	0.086	0.105	0.203	0.134	0.094	0.089	0.163	0.075	0.211	0.194	0.194	0.151	0.069	0.097	0.062	0.011	0.098	0.094	0.155
26	0.179	0.116	0.1	0.227	0.166	0.025	0.013	0.104	0.003	0.109	0.015	0.171	0.122	0.174	0.181	0.217	0.128	0.278	0.004	0.137	0.004	0.092	0.108	0.181	0.187	0.326	0.084	0.131	0.159	0.15	0.087	0.116	0.198	0.16	0.099	0.092	0.168	0.084	0.243	0.185	0.201	0.163	0.074	0.104	0.071	0.011	0.108	0.094	0.158
27	0.17	0.105	0.115	0.255	0.166	0.027	0.013	0.111	0.002	0.11	0.013	0.176	0.132	0.181	0.199	0.219	0.132	0.269	0.003	0.144	0.003	0.108	0.109	0.211	0.183	0.331	0.082	0.147	0.161	0.161	0.092	0.118	0.189	0.189	0.102	0.1	0.172	0.092	0.222	0.196	0.204	0.157	0.076	0.105	0.082	0.012	0.11	0.099	0.166
28	0.172	0.1	0.105	0.25	0.173	0.027	0.016	0.112	0.004	0.115	0.011	0.19	0.144	0.189	0.206	0.193	0.136	0.278	0.004	0.143	0.004	0.125	0.11	0.223	0.181	0.33	0.087	0.148	0.164	0.151	0.106	0.113	0.189	0.191	0.11	0.107	0.17	0.095	0.222	0.198	0.206	0.171	0.083	0.113	0.086	0.015	0.119	0.103	0.159
29	0.164	0.11	0.132	0.279	0.187	0.028	0.021	0.12	0.004	0.125	0.013	0.195	0.127	0.196	0.216	0.227	0.137	0.287	0.003	0.15	0.004	0.144	0.113	0.222	0.193	0.334	0.094	0.138	0.168	0.152	0.076	0.117	0.235	0.212	0.112	0.115	0.173	0.099	0.227	0.189	0.212	0.166	0.082	0.115	0.102	0.016	0.121	0.103	0.162
30	0.181	0.106	0.14	0.253	0.177	0.028	0.024	0.127	0.003	0.137	0.017	0.212	0.148	0.201	0.214	0.227	0.137	0.291	0.004	0.15	0.004	0.152	0.116	0.23	0.201	0.342	0.095	0.14	0.17	0.147	0.097	0.124	0.244	0.232	0.117	0.138	0.168	0.098	0.242	0.195	0.21	0.187	0.087	0.114	0.114	0.018	0.124	0.106	0.164
31	0.168	0.113	0.149	0.28	0.175	0.028	0.033	0.124	0.003	0.145	0.011	0.195	0.138	0.193	0.203	0.233	0.144	0.291	0.003	0.164	0.004	0.165	0.115	0.241	0.189	0.344	0.102	0.139	0.173	0.147	0.095	0.121	0.238	0.244	0.12	0.148	0.167	0.1	0.232	0.192	0.212	0.191	0.091	0.112	0.121	0.021	0.127	0.106	0.172
32	0.185	0.115	0.161	0.274	0.19	0.031	0.037	0.137	0.003	0.153	0.011	0.226	0.153	0.206	0.229	0.242	0.143	0.292	0.002	0.167	0.003	0.176	0.115	0.223	0.191	0.343	0.103	0.14	0.175	0.144	0.076	0.129	0.228	0.24	0.121	0.151	0.177	0.101	0.245	0.201	0.213	0.197	0.093	0.114	0.139	0.022	0.129	0.105	0.175
33	0.18	0.121	0.175	0.27	0.187	0.032	0.041	0.144	0.003	0.14	0.01	0.221	0.154	0.204	0.208	0.256	0.146	0.293	0.004	0.166	0.004	0.178	0.114	0.24	0.192	0.336	0.109	0.133	0.177	0.146	0.112	0.132	0.228	0.234	0.124	0.17	0.173	0.1	0.242	0.194	0.212	0.171	0.098	0.118	0.136	0.024	0.133	0.106	0.178
34	0.176	0.117	0.185	0.27	0.188	0.031	0.049	0.151	0.004	0.148	0.009	0.229	0.157	0.215	0.211	0.256	0.147	0.296	0.004	0.176	0.004	0.188	0.112	0.242	0.188	0.337	0.113	0.141	0.177	0.146	0.097	0.126	0.222	0.237	0.125	0.182	0.175	0.097	0.241	0.216	0.211	0.189	0.098	0.119	0.139	0.027	0.133	0.105	0.187
35	0.181	0.125	0.19	0.276	0.188	0.034	0.045	0.145	0.001	0.146	0.006	0.206	0.165	0.203	0.23	0.25	0.15	0.298	0	0.173	0.003	0.185	0.11	0.244	0.192	0.342	0.119	0.135	0.182	0.153	0.094	0.13	0.231	0.254	0.121	0.194	0.176	0.099	0.234	0.209	0.213	0.197	0.087	0.119	0.159	0.025	0.131	0.106	0.19
36	0.176	0.127	0.192	0.28	0.194	0.033	0.057	0.149	0.004	0.141	0.011	0.237	0.173	0.202	0.228	0.249	0.151	0.311	0.004	0.177	0.004	0.196	0.114	0.252	0.187	0.337	0.119	0.138	0.186	0.156	0.101	0.135	0.24	0.247	0.128	0.199	0.175	0.098	0.229	0.198	0.216	0.176	0.098	0.125	0.165	0.033	0.138	0.113	0.195
37	0.177	0.133	0.202	0.27	0.185	0.033	0.058	0.153	0.004	0.154	0.017	0.23	0.174	0.213	0.216	0.266	0.15	0.299	0.003	0.177	0.004	0.2	0.115	0.25	0.19	0.332	0.123	0.135	0.185	0.152	0.09	0.137	0.242	0.24	0.125	0.219	0.173	0.094	0.234	0.199	0.213	0.187	0.099	0.126	0.181	0.034	0.138	0.139	0.197
38	0.178	0.133	0.205	0.274	0.197	0.034	0.057	0.16	0.003	0.141	0.013	0.24	0.176	0.207	0.217	0.254	0.153	0.309	0.002	0.183	0.004	0.207	0.113	0.253	0.189	0.332	0.125	0.132	0.188	0.157	0.101	0.137	0.244	0.248	0.126	0.227	0.173	0.095	0.229	0.197	0.216	0.179	0.104	0.123	0.171	0.037	0.139	0.142	0.207
39	0.177	0.137	0.209	0.267	0.187	0.035	0.063	0.163	0.004	0.139	0.012	0.233	0.171	0.206	0.222	0.257	0.156	0.309	0.004	0.189	0.005	0.219	0.129	0.265	0.186	0.33	0.13	0.13	0.19	0.159	0.098	0.141	0.24	0.254	0.13	0.201	0.172	0.099	0.226	0.2	0.219	0.186	0.102	0.127	0.174	0.042	0.145	0.137	0.208
40	0.177	0.144	0.205	0.262	0.202	0.035	0.069	0.174	0.004	0.149	0.009	0.234	0.182	0.198	0.222	0.244	0.154	0.298	0.003	0.189	0.004	0.22	0.139	0.261	0.181	0.33	0.131	0.126	0.19	0.153	0.083	0.147	0.244	0.25	0.128	0.177	0.171	0.096	0.224	0.192	0.22	0.184	0.11	0.129	0.193	0.044	0.148	0.143	0.213
41	0.175	0.16	0.215	0.267	0.19	0.037	0.066	0.2	0.004	0.14	0.007	0.239	0.183	0.21	0.215	0.261	0.158	0.289	0.002	0.19	0.004	0.224	0.138	0.268	0.19	0.326	0.133	0.129	0.195	0.163	0.101	0.145	0.24	0.253	0.132	0.184	0.178	0.099	0.232	0.195	0.226	0.185	0.118	0.124	0.18	0.048	0.15	0.157	0.215
42	0.179	0.178	0.224	0.258	0.193	0.036	0.067	0.189	0.004	0.144	0.007	0.237	0.204	0.2	0.233	0.254	0.152	0.296	0.005	0.19	0.006	0.226	0.135	0.264	0.183	0.323	0.134	0.129	0.194	0.157	0.088	0.157	0.233	0.254	0.135	0.205	0.173	0.099	0.231	0.196	0.226	0.199	0.124	0.137	0.181	0.053	0.154	0.179	0.213
43	0.175	0.179	0.229	0.253	0.193	0.036	0.075	0.202	0.005	0.15	0.01	0.245	0.169	0.198	0.224	0.253	0.155	0.295	0.002	0.196	0.005	0.232	0.133	0.271	0.18	0.32	0.137	0.126	0.193	0.163	0.094	0.149	0.244	0.252	0.141	0.208	0.175	0.095	0.24	0.188	0.23	0.199	0.137	0.149	0.189	0.06	0.162	0.179	0.217
44	0.18	0.187	0.225	0.257	0.185	0.038	0.084	0.221	0.004	0.15	0.007	0.251	0.183	0.201	0.225	0.255	0.156	0.298	0.002	0.196	0.005	0.228	0.139	0.271	0.181	0.318	0.139	0.126	0.192	0.159	0.1	0.14	0.241	0.247	0.146	0.186	0.176	0.098	0.243	0.187	0.23	0.202	0.131	0.154	0.191	0.065	0.169	0.188	0.232
45	0.181	0.194	0.236	0.258	0.187	0.038	0.099	0.215	0.004	0.156	0.009	0.264	0.185	0.201	0.226	0.266	0.161	0.298	0.003	0.201	0.006	0.227	0.138	0.274	0.181	0.318	0.141	0.134	0.195	0.176	0.094	0.143	0.241	0.253	0.156	0.172	0.173	0.099	0.244	0.19	0.232	0.194	0.138	0.158	0.204	0.069	0.172	0.199	0.215
46	0.18	0.199	0.236	0.247	0.196	0.038	0.091	0.208	0.004	0.152	0.008	0.251	0.189	0.197	0.228	0.252	0.158	0.287	0.006	0.204	0.007	0.224	0.143	0.273	0.182	0.312	0.139	0.129	0.194	0.172	0.098	0.142	0.239	0.254	0.17	0.203	0.175	0.099	0.245	0.185	0.236	0.193	0.17	0.173	0.204	0.076	0.181	0.207	0.218
47	0.177	0.203	0.23	0.246	0.181	0.039	0.101	0.212	0.004	0.158	0.01	0.258	0.184	0.195	0.23	0.258	0.157	0.282	0.008	0.207	0.008	0.223	0.148	0.275	0.177	0.312	0.146	0.128	0.195	0.175	0.098	0.163	0.239	0.249	0.188	0.233	0.174	0.102	0.255	0.185	0.238	0.193	0.191	0.195	0.194	0.083	0.189	0.196	0.212
48	0.18	0.215	0.247	0.249	0.193	0.041	0.11	0.21	0.005	0.167	0.011	0.247	0.178	0.199	0.237	0.263	0.159	0.289	0.007	0.214	0.006	0.232	0.149	0.284	0.182	0.313	0.148	0.131	0.194	0.19	0.102	0.164	0.239	0.252	0.194	0.231	0.175	0.104	0.257	0.183	0.238	0.207	0.197	0.206	0.191	0.087	0.196	0.206	0.219
[truncated: 71 more columns]

## Sheet: B
time (h)	Che1.1	Che1.2	Che1.3	Che1.4	Che1.5	Che1.6	Che1.7	Che1.8	Che1.9	Che1.10	Che1.11	Che1.12	Che1.13	Che1.14	Che1.15	Che1.16	Che1.17	Che1.18	Che1.19	Che1.20	Che2.1	Che2.2	Che2.3	Che2.4	Che.2.5	Che.2.6	Che.2.7	Che.2.8	Che.2.9	Che2.11	Che.2.10	Che2.12	Che2.13	Che2.14	Che2.15	Che2.16	Che2.17	Che2.18	Che2.19	Che2.20	Che3.1	Che3.2	Che3.3	Che3.4	Che3.5	Che3.6	Che3.7	Che3.8	Che3.9
0	0	0.002	0.026	0.013	0.011	0.022	0	0.004	0.003	0.001	0.012	0.003	0.015	0.004	0.008	0.005	0.007	0.005	0	0.002	0	0.006	0	0.006	0.006	0	0	0.002	0.002	0	0.002	0.005	0.01	0.008	0.003	0	0.018	0	0.009	0	0	0	0	0	0	0.002	0	0	0.02
1	0.001	0	0.014	0.001	0	0.01	0.005	0	0.001	0	0.006	0	0	0	0	0	0	0	0.006	0	0.002	0	0	0	0	0.004	0	0	0.001	0.005	0	0	0	0	0	0.002	0	0.002	0	0.002	0.008	0.006	0.001	0	0.001	0	0	0.001	0.005
2	0.005	0.002	0.004	0	0.001	0.01	0.016	0.003	0.006	0.003	0.008	0.005	0.002	0.001	0.001	0.001	0.003	0.001	0.013	0.006	0.011	0.005	0.004	0.006	0.001	0.006	0.004	0.002	0	0.007	0.003	0.004	0.002	0.002	0.007	0.008	0	0.008	0.001	0.003	0.011	0.01	0.005	0.006	0.006	0.002	0.002	0.005	0.003
3	0.011	0.006	0	0.002	0.007	0.007	0.018	0.004	0.005	0.008	0.006	0.011	0.005	0.005	0.004	0.005	0.005	0.007	0.009	0.006	0.01	0.009	0.017	0.012	0.004	0.01	0.006	0.003	0	0.012	0.011	0.006	0.006	0.007	0.024	0.021	0.004	0.018	0.003	0.003	0.013	0.01	0.013	0.016	0.007	0.005	0.008	0.013	0
4	0.016	0.008	0.002	0.006	0.01	0.003	0.022	0.005	0.004	0.012	0.005	0.015	0.008	0.009	0.011	0.011	0.011	0.013	0.009	0.009	0.014	0.017	0.03	0.018	0.009	0.011	0.011	0.012	0.003	0.021	0.016	0.011	0.034	0.016	0.039	0.03	0.011	0.034	0.01	0.013	0.016	0.014	0.025	0.027	0.011	0.009	0.016	0.029	0.011
5	0.018	0.012	0.013	0.01	0.009	0	0.06	0.012	0.002	0.016	0.002	0.019	0.013	0.024	0.029	0.023	0.017	0.017	0.026	0.014	0.017	0.043	0.031	0.026	0.016	0.013	0.017	0.033	0.008	0.026	0.025	0.019	0.014	0.036	0.036	0.03	0.017	0.042	0.021	0.032	0.033	0.033	0.034	0.038	0.021	0.01	0.024	0.039	0.044
6	0.04	0.025	0.028	0.023	0.017	0.001	0.046	0.035	0	0.032	0	0.022	0.025	0.06	0.052	0.056	0.03	0.038	0.026	0.032	0.021	0.065	0.039	0.065	0.045	0.02	0.037	0.052	0.012	0.035	0.041	0.028	0.019	0.072	0.035	0.041	0.047	0.052	0.049	0.061	0.034	0.038	0.042	0.041	0.03	0.016	0.037	0.046	0.065
7	0.063	0.031	0.04	0.052	0.027	0.001	0.048	0.057	0.001	0.037	0.002	0.037	0.044	0.08	0.068	0.078	0.032	0.068	0.029	0.032	0.028	0.093	0.04	0.082	0.065	0.025	0.044	0.07	0.015	0.047	0.062	0.031	0.047	0.098	0.036	0.036	0.07	0.046	0.062	0.086	0.038	0.07	0.05	0.051	0.034	0.022	0.045	0.057	0.076
8	0.082	0.04	0.066	0.07	0.046	0.004	0.06	0.077	0.004	0.05	0.006	0.052	0.059	0.091	0.076	0.092	0.039	0.084	0.042	0.056	0.035	0.106	0.04	0.096	0.085	0.021	0.042	0.074	0.017	0.053	0.09	0.048	0.114	0.114	0.043	0.043	0.086	0.049	0.081	0.094	0.038	0.085	0.056	0.061	0.071	0.031	0.046	0.071	0.088
9	0.094	0.047	0.076	0.079	0.063	0.006	0.063	0.084	0.007	0.057	0.009	0.049	0.067	0.101	0.082	0.093	0.046	0.097	0.043	0.072	0.039	0.102	0.041	0.104	0.096	0.023	0.047	0.073	0.02	0.052	0.095	0.055	0.115	0.107	0.029	0.05	0.098	0.061	0.087	0.086	0.044	0.082	0.059	0.068	0.078	0.032	0.054	0.077	0.095
10	0.107	0.052	0.082	0.085	0.07	0.014	0.07	0.088	0.012	0.059	0.016	0.055	0.076	0.11	0.091	0.098	0.058	0.107	0.051	0.088	0.041	0.104	0.048	0.113	0.106	0.043	0.053	0.079	0.025	0.053	0.105	0.058	0.117	0.106	0.033	0.059	0.101	0.054	0.092	0.089	0.054	0.084	0.067	0.076	0.075	0.035	0.065	0.087	0.099
11	0.119	0.057	0.085	0.088	0.077	0.022	0.076	0.09	0.016	0.062	0.024	0.065	0.086	0.117	0.097	0.109	0.065	0.114	0.06	0.098	0.041	0.106	0.052	0.116	0.111	0.047	0.061	0.078	0.028	0.054	0.114	0.054	0.12	0.105	0.038	0.067	0.102	0.061	0.1	0.087	0.056	0.088	0.07	0.082	0.077	0.037	0.072	0.094	0.101
12	0.121	0.062	0.089	0.092	0.085	0.029	0.089	0.092	0.024	0.068	0.032	0.075	0.083	0.12	0.094	0.111	0.072	0.117	0.059	0.101	0.041	0.109	0.054	0.116	0.109	0.051	0.066	0.073	0.032	0.057	0.123	0.058	0.126	0.106	0.046	0.075	0.098	0.07	0.103	0.084	0.062	0.091	0.077	0.092	0.08	0.041	0.079	0.103	0.083
13	0.122	0.073	0.092	0.09	0.084	0.042	0.089	0.091	0.034	0.078	0.04	0.071	0.096	0.126	0.101	0.111	0.075	0.12	0.07	0.102	0.046	0.112	0.059	0.116	0.109	0.056	0.072	0.074	0.038	0.061	0.124	0.067	0.127	0.108	0.052	0.084	0.102	0.074	0.107	0.087	0.07	0.098	0.085	0.106	0.084	0.046	0.082	0.109	0.112
14	0.121	0.075	0.095	0.089	0.086	0.049	0.105	0.095	0.044	0.082	0.048	0.077	0.106	0.129	0.106	0.114	0.08	0.123	0.075	0.105	0.048	0.114	0.062	0.117	0.109	0.059	0.068	0.077	0.041	0.063	0.125	0.07	0.122	0.109	0.059	0.092	0.104	0.082	0.115	0.087	0.075	0.103	0.089	0.111	0.085	0.05	0.086	0.115	0.123
15	0.125	0.085	0.103	0.093	0.095	0.055	0.113	0.085	0.049	0.087	0.049	0.091	0.097	0.133	0.108	0.115	0.084	0.124	0.082	0.106	0.054	0.121	0.069	0.118	0.11	0.062	0.077	0.079	0.046	0.067	0.131	0.074	0.117	0.112	0.065	0.099	0.109	0.086	0.117	0.092	0.08	0.11	0.095	0.116	0.091	0.056	0.087	0.121	0.113
16	0.132	0.09	0.097	0.1	0.096	0.063	0.119	0.087	0.052	0.094	0.06	0.102	0.082	0.134	0.115	0.119	0.089	0.126	0.088	0.111	0.056	0.127	0.071	0.126	0.112	0.066	0.083	0.084	0.049	0.068	0.132	0.081	0.116	0.112	0.073	0.108	0.11	0.095	0.12	0.095	0.086	0.117	0.103	0.122	0.093	0.068	0.093	0.13	0.112
17	0.126	0.094	0.104	0.105	0.107	0.06	0.125	0.098	0.055	0.095	0.071	0.103	0.105	0.134	0.12	0.123	0.091	0.13	0.098	0.108	0.068	0.126	0.072	0.13	0.114	0.069	0.085	0.082	0.05	0.072	0.136	0.078	0.118	0.112	0.079	0.113	0.107	0.1	0.126	0.094	0.088	0.118	0.106	0.126	0.096	0.074	0.1	0.137	0.116
18	0.12	0.099	0.095	0.11	0.108	0.059	0.146	0.105	0.058	0.101	0.06	0.098	0.112	0.136	0.119	0.125	0.092	0.132	0.08	0.125	0.062	0.125	0.071	0.131	0.114	0.073	0.087	0.083	0.051	0.075	0.135	0.081	0.123	0.112	0.086	0.122	0.108	0.1	0.125	0.094	0.09	0.122	0.112	0.13	0.098	0.084	0.106	0.144	0.121
19	0.11	0.099	0.109	0.109	0.105	0.081	0.136	0.11	0.061	0.103	0.059	0.105	0.091	0.135	0.123	0.129	0.097	0.133	0.106	0.131	0.064	0.129	0.076	0.134	0.103	0.078	0.088	0.089	0.052	0.075	0.138	0.085	0.124	0.112	0.093	0.129	0.109	0.107	0.131	0.099	0.094	0.124	0.118	0.132	0.101	0.094	0.114	0.157	0.11
20	0.109	0.096	0.117	0.11	0.123	0.055	0.148	0.105	0.059	0.106	0.067	0.118	0.107	0.133	0.122	0.128	0.099	0.129	0.085	0.132	0.068	0.129	0.077	0.13	0.106	0.081	0.093	0.09	0.051	0.083	0.142	0.087	0.122	0.113	0.097	0.135	0.105	0.12	0.137	0.101	0.098	0.13	0.126	0.138	0.104	0.101	0.115	0.152	0.139
21	0.11	0.105	0.11	0.111	0.098	0.057	0.148	0.103	0.063	0.108	0.062	0.116	0.092	0.132	0.121	0.128	0.099	0.131	0.098	0.136	0.065	0.129	0.08	0.131	0.108	0.083	0.094	0.095	0.054	0.08	0.147	0.089	0.125	0.113	0.103	0.138	0.123	0.116	0.142	0.103	0.103	0.129	0.13	0.149	0.106	0.11	0.116	0.151	0.102
22	0.107	0.102	0.129	0.111	0.105	0.072	0.131	0.109	0.07	0.109	0.067	0.121	0.088	0.132	0.121	0.132	0.102	0.13	0.094	0.137	0.068	0.128	0.079	0.131	0.104	0.085	0.102	0.098	0.06	0.082	0.15	0.09	0.128	0.112	0.11	0.142	0.102	0.132	0.144	0.11	0.107	0.132	0.134	0.157	0.107	0.118	0.125	0.164	0.116
23	0.131	0.107	0.107	0.111	0.103	0.058	0.161	0.115	0.057	0.113	0.067	0.126	0.11	0.127	0.121	0.127	0.102	0.119	0.098	0.133	0.067	0.129	0.083	0.129	0.102	0.086	0.103	0.1	0.061	0.063	0.155	0.093	0.126	0.114	0.115	0.147	0.104	0.131	0.143	0.114	0.108	0.131	0.135	0.163	0.108	0.122	0.12	0.162	0.129
24	0.129	0.114	0.121	0.107	0.104	0.05	0.138	0.12	0.065	0.115	0.068	0.126	0.087	0.126	0.116	0.124	0.103	0.124	0.097	0.131	0.07	0.13	0.087	0.137	0.111	0.086	0.102	0.101	0.064	0.084	0.151	0.096	0.128	0.114	0.116	0.155	0.127	0.137	0.144	0.116	0.112	0.134	0.138	0.169	0.111	0.125	0.131	0.162	0.129
25	0.142	0.114	0.127	0.109	0.103	0.049	0.147	0.11	0.051	0.116	0.066	0.122	0.118	0.125	0.109	0.122	0.102	0.122	0.101	0.132	0.071	0.129	0.086	0.139	0.111	0.087	0.1	0.105	0.067	0.088	0.15	0.097	0.128	0.113	0.124	0.157	0.116	0.139	0.143	0.118	0.114	0.138	0.133	0.171	0.111	0.128	0.128	0.173	0.133
26	0.14	0.117	0.121	0.089	0.103	0.056	0.156	0.123	0.064	0.12	0.062	0.129	0.096	0.135	0.113	0.124	0.107	0.129	0.117	0.137	0.074	0.128	0.09	0.131	0.117	0.09	0.103	0.108	0.069	0.089	0.152	0.099	0.133	0.115	0.124	0.156	0.12	0.145	0.142	0.121	0.119	0.133	0.135	0.177	0.114	0.132	0.132	0.174	0.135
27	0.128	0.115	0.136	0.09	0.1	0.054	0.146	0.131	0.059	0.12	0.057	0.133	0.089	0.125	0.109	0.119	0.105	0.133	0.115	0.131	0.071	0.126	0.09	0.131	0.121	0.09	0.097	0.115	0.072	0.093	0.155	0.098	0.134	0.111	0.129	0.162	0.128	0.144	0.142	0.126	0.116	0.129	0.134	0.176	0.113	0.13	0.131	0.173	0.152
28	0.114	0.119	0.147	0.105	0.105	0.049	0.159	0.123	0.058	0.122	0.059	0.132	0.093	0.129	0.113	0.113	0.108	0.137	0.104	0.133	0.074	0.122	0.088	0.12	0.114	0.091	0.103	0.117	0.073	0.092	0.166	0.1	0.134	0.109	0.127	0.163	0.113	0.15	0.143	0.127	0.119	0.133	0.137	0.179	0.115	0.133	0.135	0.176	0.111
29	0.116	0.118	0.13	0.109	0.101	0.045	0.144	0.125	0.061	0.123	0.056	0.132	0.116	0.109	0.116	0.125	0.108	0.13	0.108	0.137	0.073	0.122	0.089	0.123	0.119	0.093	0.103	0.121	0.071	0.08	0.149	0.101	0.142	0.107	0.13	0.171	0.121	0.151	0.142	0.128	0.115	0.122	0.136	0.182	0.114	0.136	0.139	0.171	0.113
30	0.118	0.123	0.141	0.096	0.107	0.047	0.14	0.117	0.056	0.123	0.059	0.13	0.109	0.121	0.102	0.115	0.109	0.134	0.128	0.143	0.071	0.11	0.096	0.132	0.112	0.094	0.104	0.123	0.073	0.095	0.15	0.101	0.14	0.106	0.132	0.173	0.127	0.158	0.139	0.128	0.113	0.127	0.137	0.185	0.115	0.138	0.149	0.162	0.129
31	0.128	0.121	0.157	0.113	0.101	0.047	0.144	0.144	0.052	0.12	0.055	0.138	0.118	0.129	0.112	0.124	0.11	0.116	0.112	0.146	0.072	0.108	0.094	0.12	0.1	0.096	0.108	0.123	0.076	0.098	0.17	0.103	0.141	0.106	0.141	0.173	0.114	0.168	0.107	0.13	0.123	0.125	0.141	0.191	0.117	0.143	0.145	0.149	0.122
32	0.126	0.13	0.152	0.109	0.099	0.046	0.161	0.135	0.053	0.12	0.056	0.14	0.121	0.128	0.108	0.11	0.111	0.143	0.113	0.155	0.072	0.118	0.115	0.13	0.101	0.102	0.111	0.121	0.078	0.098	0.139	0.105	0.145	0.108	0.146	0.177	0.118	0.177	0.11	0.13	0.121	0.125	0.144	0.189	0.117	0.148	0.151	0.161	0.116
33	0.109	0.126	0.139	0.116	0.106	0.044	0.163	0.137	0.056	0.121	0.048	0.148	0.11	0.13	0.105	0.111	0.111	0.133	0.129	0.147	0.069	0.119	0.106	0.132	0.104	0.104	0.117	0.128	0.078	0.099	0.154	0.104	0.151	0.105	0.147	0.181	0.109	0.179	0.109	0.134	0.126	0.128	0.147	0.189	0.115	0.151	0.159	0.155	0.12
34	0.126	0.125	0.148	0.113	0.124	0.045	0.154	0.136	0.051	0.111	0.046	0.134	0.117	0.128	0.107	0.113	0.111	0.127	0.148	0.105	0.069	0.108	0.106	0.135	0.116	0.105	0.116	0.129	0.081	0.11	0.169	0.106	0.138	0.106	0.149	0.185	0.123	0.18	0.125	0.137	0.138	0.128	0.162	0.19	0.115	0.155	0.164	0.158	0.11
35	0.127	0.132	0.146	0.112	0.117	0.044	0.135	0.132	0.05	0.122	0.046	0.13	0.118	0.129	0.111	0.115	0.108	0.147	0.137	0.136	0.073	0.112	0.105	0.127	0.111	0.104	0.112	0.128	0.084	0.106	0.16	0.104	0.146	0.103	0.144	0.171	0.108	0.176	0.126	0.134	0.143	0.129	0.174	0.188	0.116	0.158	0.162	0.157	0.117
36	0.13	0.137	0.131	0.102	0.123	0.041	0.159	0.152	0.051	0.128	0.047	0.152	0.126	0.123	0.111	0.112	0.119	0.141	0.136	0.143	0.072	0.11	0.104	0.14	0.099	0.104	0.117	0.129	0.083	0.108	0.156	0.107	0.143	0.104	0.14	0.176	0.111	0.169	0.121	0.131	0.133	0.131	0.182	0.189	0.117	0.162	0.165	0.149	0.125
37	0.137	0.136	0.133	0.12	0.103	0.044	0.131	0.158	0.05	0.123	0.048	0.146	0.124	0.128	0.111	0.116	0.112	0.141	0.142	0.149	0.072	0.13	0.103	0.141	0.109	0.105	0.124	0.13	0.088	0.085	0.165	0.099	0.156	0.105	0.138	0.183	0.113	0.169	0.127	0.135	0.132	0.133	0.184	0.19	0.116	0.166	0.16	0.145	0.128
38	0.134	0.136	0.161	0.108	0.139	0.043	0.135	0.139	0.047	0.128	0.046	0.154	0.131	0.117	0.123	0.108	0.119	0.136	0.123	0.153	0.07	0.104	0.105	0.14	0.104	0.104	0.129	0.132	0.087	0.107	0.171	0.105	0.147	0.102	0.137	0.164	0.118	0.166	0.105	0.138	0.136	0.136	0.183	0.189	0.115	0.167	0.151	0.141	0.122
39	0.138	0.126	0.131	0.102	0.136	0.045	0.144	0.174	0.047	0.119	0.048	0.144	0.136	0.132	0.108	0.126	0.118	0.134	0.125	0.158	0.074	0.108	0.11	0.119	0.109	0.107	0.135	0.133	0.088	0.097	0.167	0.105	0.157	0.102	0.138	0.165	0.121	0.166	0.117	0.139	0.136	0.127	0.184	0.192	0.114	0.167	0.149	0.144	0.137
40	0.135	0.137	0.129	0.113	0.141	0.043	0.171	0.164	0.045	0.123	0.045	0.149	0.139	0.122	0.124	0.113	0.118	0.14	0.112	0.156	0.072	0.11	0.119	0.137	0.111	0.106	0.132	0.132	0.086	0.116	0.171	0.098	0.153	0.099	0.139	0.168	0.119	0.163	0.114	0.138	0.142	0.142	0.19	0.192	0.115	0.168	0.15	0.153	0.124
41	0.141	0.133	0.154	0.113	0.144	0.043	0.186	0.151	0.045	0.135	0.044	0.138	0.145	0.126	0.122	0.12	0.116	0.125	0.127	0.154	0.071	0.109	0.115	0.124	0.117	0.107	0.132	0.136	0.088	0.116	0.18	0.103	0.161	0.099	0.14	0.16	0.112	0.166	0.11	0.137	0.136	0.139	0.188	0.19	0.115	0.168	0.153	0.159	0.127
42	0.142	0.142	0.164	0.107	0.15	0.043	0.167	0.15	0.045	0.13	0.044	0.156	0.148	0.13	0.122	0.122	0.114	0.131	0.137	0.166	0.072	0.1	0.114	0.126	0.116	0.108	0.128	0.133	0.09	0.124	0.163	0.108	0.147	0.097	0.143	0.156	0.127	0.171	0.107	0.138	0.133	0.139	0.188	0.19	0.116	0.169	0.154	0.168	0.147
43	0.137	0.144	0.16	0.112	0.15	0.044	0.169	0.155	0.046	0.133	0.044	0.148	0.148	0.125	0.124	0.111	0.106	0.139	0.119	0.175	0.072	0.107	0.114	0.126	0.107	0.108	0.127	0.134	0.089	0.122	0.167	0.099	0.141	0.093	0.147	0.156	0.118	0.173	0.104	0.139	0.147	0.143	0.188	0.186	0.116	0.169	0.158	0.177	0.132
44	0.133	0.149	0.167	0.111	0.155	0.044	0.17	0.138	0.046	0.13	0.044	0.152	0.152	0.136	0.138	0.121	0.102	0.123	0.107	0.173	0.073	0.114	0.112	0.12	0.108	0.108	0.127	0.136	0.09	0.12	0.19	0.106	0.145	0.092	0.149	0.157	0.114	0.176	0.106	0.143	0.161	0.146	0.196	0.184	0.117	0.167	0.162	0.189	0.141
45	0.135	0.15	0.158	0.105	0.155	0.044	0.155	0.148	0.047	0.124	0.044	0.156	0.154	0.131	0.125	0.116	0.098	0.138	0.15	0.181	0.073	0.106	0.12	0.121	0.109	0.108	0.13	0.135	0.089	0.132	0.171	0.101	0.153	0.091	0.154	0.159	0.119	0.179	0.113	0.139	0.167	0.128	0.189	0.188	0.117	0.166	0.165	0.198	0.124
46	0.143	0.14	0.159	0.12	0.158	0.044	0.163	0.163	0.047	0.129	0.043	0.153	0.152	0.125	0.133	0.116	0.093	0.13	0.146	0.178	0.071	0.117	0.13	0.13	0.106	0.106	0.138	0.133	0.093	0.12	0.152	0.098	0.163	0.092	0.159	0.159	0.12	0.179	0.111	0.137	0.175	0.153	0.191	0.18	0.116	0.163	0.17	0.203	0.126
47	0.138	0.15	0.156	0.107	0.162	0.044	0.174	0.179	0.047	0.135	0.044	0.169	0.155	0.133	0.128	0.123	0.099	0.137	0.136	0.166	0.071	0.114	0.133	0.128	0.104	0.106	0.137	0.138	0.089	0.137	0.182	0.103	0.147	0.095	0.164	0.17	0.119	0.18	0.106	0.14	0.177	0.133	0.198	0.178	0.117	0.161	0.174	0.197	0.153
48	0.142	0.142	0.183	0.113	0.164	0.045	0.16	0.183	0.048	0.13	0.045	0.162	0.156	0.128	0.132	0.124	0.103	0.13	0.118	0.184	0.073	0.119	0.152	0.134	0.114	0.107	0.135	0.138	0.094	0.136	0.172	0.112	0.147	0.099	0.171	0.185	0.121	0.186	0.114	0.143	0.184	0.156	0.2	0.178	0.119	0.162	0.179	0.195	0.14
[truncated: 71 more columns]

## Sheet: C
time (h)	SBW25		ΔrccR		ΔhexR		Chevallier isolates		Tipple isolates
0	0.017667	0.004522	0.0176667	0.004743	0.017	0.002386	0.01268	0.001187	0.018433	0.001426
1	0.021556	0.00318	0.0225556	0.004073	0.02	0.002154	0.026397	0.002435	0.029833	0.002137
2	0.024556	0.003189	0.0198889	0.003377	0.0234444	0.003245	0.038788	0.003982	0.04015	0.003606
3	0.025667	0.003051	0.018	0.002915	0.0224444	0.003046	0.052106	0.005607	0.059517	0.00572
4	0.023111	0.002342	0.022	0.005465	0.0251111	0.003714	0.065939	0.006634	0.077	0.007318
5	0.022222	0.002266	0.0214444	0.004324	0.024	0.003965	0.077591	0.007539	0.0964	0.008411
6	0.022889	0.002946	0.022	0.004622	0.0223333	0.003869	0.091712	0.008458	0.109167	0.009109
7	0.024889	0.0027	0.026	0.004598	0.0213333	0.003632	0.097818	0.009025	0.122583	0.009725
8	0.030111	0.003417	0.0274444	0.005701	0.0228889	0.003672	0.114242	0.009675	0.143767	0.010533
9	0.037889	0.005966	0.0327778	0.005854	0.0247778	0.003677	0.127424	0.009913	0.168883	0.011414
10	0.05	0.010538	0.0434444	0.009322	0.03	0.004368	0.149394	0.010024	0.201133	0.011911
11	0.065333	0.015054	0.0556667	0.011547	0.0403333	0.00736	0.166288	0.01032	0.22355	0.012571
12	0.082667	0.015328	0.0697778	0.013739	0.0566667	0.009612	0.185182	0.010135	0.248517	0.013215
13	0.104556	0.018696	0.085	0.016231	0.0698889	0.010123	0.203197	0.010445	0.278433	0.014349
14	0.132889	0.021245	0.099	0.019577	0.0906667	0.011746	0.230242	0.010954	0.29895	0.01535
15	0.160556	0.023178	0.118889	0.021955	0.107556	0.01324	0.257788	0.011994	0.320933	0.016254
16	0.183222	0.025922	0.137444	0.026011	0.128222	0.015883	0.282803	0.012868	0.34385	0.017476
17	0.202111	0.031912	0.156889	0.030743	0.142444	0.018365	0.318985	0.014277	0.3684	0.019013
18	0.217444	0.033926	0.177444	0.032622	0.164667	0.020675	0.360182	0.016573	0.38915	0.019891
19	0.230111	0.036814	0.198667	0.032762	0.187111	0.022066	0.397712	0.018865	0.411917	0.021202
20	0.240778	0.037001	0.215111	0.033227	0.206222	0.026111	0.435076	0.02116	0.435683	0.021991
21	0.257556	0.038818	0.228778	0.035086	0.231333	0.026682	0.464409	0.022519	0.45545	0.022641
22	0.263778	0.038489	0.242889	0.037219	0.247556	0.028118	0.500167	0.0248	0.476367	0.023513
23	0.270333	0.037628	0.253556	0.040209	0.264667	0.028633	0.518076	0.025507	0.494183	0.025245
24	0.273556	0.037039	0.261667	0.041649	0.274222	0.027607	0.531258	0.024575	0.508633	0.027058
25	0.278111	0.036237	0.272556	0.043402	0.284222	0.02991	0.557591	0.025831	0.522133	0.027344
26	0.285444	0.034977	0.282111	0.045253	0.288222	0.02969	0.562227	0.026678	0.526717	0.028416
27	0.291667	0.034224	0.290556	0.048143	0.3	0.029598	0.573924	0.028203	0.531067	0.028113
28	0.297222	0.032959	0.302667	0.047771	0.303	0.0311	0.593894	0.028759	0.54305	0.02832
29	0.303778	0.033011	0.308556	0.049075	0.315778	0.032096	0.607227	0.031232	0.54785	0.029164
30	0.311556	0.031077	0.309778	0.048203	0.310222	0.032132	0.602727	0.030339	0.549333	0.028638
31	0.308778	0.032757	0.317333	0.047485	0.322889	0.027939	0.618061	0.032062	0.5565	0.029214
32	0.312222	0.032171	0.322889	0.044971	0.321889	0.028464	0.610667	0.02942	0.55495	0.028578
33	0.313889	0.032875	0.324111	0.046435	0.323333	0.029623	0.61253	0.030014	0.553933	0.029233
34	0.318111	0.034165	0.332111	0.045526	0.327333	0.033043	0.612015	0.028905	0.563617	0.030698
35	0.320111	0.035236	0.338556	0.045163	0.333889	0.032672	0.613182	0.029559	0.560367	0.029581
36	0.324	0.035891	0.340889	0.044541	0.331333	0.032017	0.628439	0.031041	0.568617	0.030641
37	0.324333	0.037197	0.345556	0.044536	0.339667	0.033097	0.63297	0.031461	0.560333	0.028416
38	0.326222	0.037977	0.347667	0.044788	0.336444	0.033114	0.606106	0.028458	0.555783	0.027495
39	0.328333	0.038442	0.355222	0.044685	0.339444	0.033436	0.608924	0.028684	0.551733	0.026974
40	0.328667	0.039411	0.359889	0.045493	0.340333	0.03325	0.611	0.028475	0.548533	0.026543
41	0.330889	0.039496	0.363778	0.04412	0.340444	0.034301	0.605803	0.028221	0.546017	0.026318
42	0.337889	0.038982	0.364889	0.044092	0.344222	0.037244	0.602364	0.028118	0.542867	0.025855
43	0.345	0.039972	0.366778	0.044712	0.345	0.038389	0.601758	0.028262	0.54145	0.025618
44	0.355556	0.044212	0.372111	0.043416	0.345556	0.037713	0.595061	0.027641	0.538717	0.025613
45	0.358111	0.047078	0.379778	0.044154	0.356444	0.041901	0.59753	0.027082	0.537033	0.025253
46	0.361222	0.049245	0.390333	0.044722	0.367333	0.039345	0.59697	0.026942	0.535617	0.025282
47	0.367	0.050037	0.405889	0.044885	0.382444	0.03984	0.589394	0.026918	0.5334	0.024919
48	0.371667	0.051236	0.410778	0.046024	0.393444	0.03983	0.588697	0.026558	0.532333	0.024538

## Sheet: D
time (h)	SBW25		ΔrccR		ΔhexR		Chevallier isolates		Tipple isolates
0	0.023556	0.002863	0.0163333	0.00185592	0.0193333	0.002455	0.020561	0.001799	0.014779	0.001266
1	0.031667	0.003951	0.0145	0.00156525	0.0196667	0.001213	0.022167	0.001948	0.017812	0.001426
2	0.023	0.002582	0.0111667	0.000909823	0.015	0.001563	0.028333	0.002658	0.023675	0.002735
3	0.020889	0.002502	0.0133333	0.00133333	0.0162222	0.001809	0.034742	0.003425	0.030957	0.003183
4	0.021333	0.002915	0.0136667	0.00105409	0.0168889	0.001783	0.036015	0.003817	0.040447	0.004237
5	0.023	0.003136	0.0131667	0.000703167	0.0168889	0.001654	0.035818	0.00408	0.047981	0.004943
6	0.023111	0.003638	0.0123333	0.00140634	0.0164444	0.00178	0.033515	0.00396	0.052029	0.005553
7	0.023	0.003877	0.013	0.00126491	0.0184444	0.001937	0.032212	0.003979	0.055712	0.005833
8	0.023333	0.003723	0.0131667	0.001424	0.018	0.001756	0.030212	0.003705	0.057617	0.006049
9	0.023444	0.004522	0.0133333	0.00156347	0.0181111	0.002017	0.029455	0.003608	0.059121	0.0061
10	0.024444	0.005017	0.013	0.00136626	0.0193333	0.002082	0.028152	0.00351	0.060117	0.00609
11	0.025556	0.004658	0.0135	0.00117615	0.0191111	0.001711	0.026652	0.003153	0.061217	0.006018
12	0.027778	0.005527	0.0143333	0.0013581	0.0208889	0.002988	0.026576	0.003162	0.062583	0.00602
13	0.028889	0.005894	0.0135	0.00123153	0.0206667	0.002799	0.025273	0.002928	0.06275	0.005958
14	0.028556	0.005444	0.0131667	0.00113774	0.0224444	0.003046	0.025409	0.002986	0.06385	0.005906
15	0.030444	0.005608	0.0133333	0.00120185	0.0232222	0.003593	0.025288	0.003007	0.064917	0.005843
16	0.032556	0.00646	0.0128333	0.000703167	0.0247778	0.003803	0.024955	0.002959	0.06555	0.005823
17	0.034111	0.005685	0.0131667	0.000945751	0.0268889	0.00404	0.024985	0.002977	0.066414	0.005769
18	0.036667	0.006353	0.0135	0.00145488	0.0278889	0.004351	0.024364	0.002965	0.067283	0.005676
19	0.038	0.00639	0.0126667	0.000760117	0.029	0.003976	0.025212	0.00305	0.068067	0.00566
20	0.038889	0.006742	0.0126667	0.00120185	0.0307778	0.003654	0.025288	0.003116	0.069191	0.005737
21	0.041444	0.006764	0.014	0.00123828	0.0336667	0.003976	0.025439	0.003194	0.070383	0.00566
22	0.042556	0.005993	0.0143333	0.00122927	0.0331111	0.003885	0.024394	0.003085	0.071133	0.005678
23	0.045	0.006355	0.0135	0.00108781	0.0348889	0.004205	0.025515	0.003222	0.07215	0.00571
24	0.046111	0.006546	0.0138333	0.000542627	0.0358889	0.004178	0.02497	0.003186	0.072733	0.005714
25	0.045556	0.006575	0.0141667	0.00135195	0.036	0.004589	0.025939	0.003337	0.07305	0.005748
26	0.047222	0.006057	0.0136667	0.00149815	0.038	0.003997	0.025939	0.00334	0.073983	0.005734
27	0.048222	0.005948	0.0135	0.000921954	0.0392222	0.004415	0.026197	0.003389	0.074617	0.005748
28	0.049556	0.006399	0.013	0.00126491	0.0388889	0.00404	0.027348	0.003489	0.0752	0.005784
29	0.050222	0.006622	0.0126667	0.00102198	0.0392222	0.004262	0.026667	0.00344	0.076067	0.005821
30	0.051444	0.006133	0.0138333	0.00164148	0.0415556	0.004004	0.028303	0.003641	0.07695	0.005868
31	0.050556	0.006287	0.0146667	0.00190904	0.0418889	0.00405	0.027364	0.003589	0.077267	0.005873
32	0.053778	0.006144	0.0128333	0.00132707	0.0434444	0.003709	0.029364	0.00379	0.0785	0.005928
33	0.053	0.005654	0.0141667	0.00135195	0.0427778	0.004475	0.028258	0.003697	0.07885	0.005945
34	0.054778	0.005504	0.0141667	0.00153659	0.0457778	0.004139	0.029318	0.003797	0.079567	0.006001
35	0.055778	0.005367	0.0141667	0.00183333	0.0441111	0.00351	0.030091	0.003934	0.0803	0.006036
36	0.057444	0.00454	0.0156667	0.00192642	0.0466667	0.003993	0.029424	0.00382	0.081017	0.006039
37	0.058111	0.004806	0.014	0.00175119	0.046	0.003779	0.030636	0.004011	0.081	0.006083
38	0.059556	0.004482	0.015	0.00275681	0.048	0.004003	0.03003	0.003927	0.082283	0.006104
39	0.059444	0.004703	0.0156667	0.00281267	0.0485556	0.00411	0.030879	0.004104	0.082333	0.006153
40	0.062556	0.00424	0.0153333	0.00244495	0.0493333	0.004017	0.030424	0.00402	0.083267	0.00619
41	0.062667	0.004787	0.0146667	0.00248551	0.05	0.003862	0.03147	0.004219	0.083517	0.006218
42	0.063444	0.00411	0.015	0.00280476	0.0513333	0.004048	0.031258	0.004114	0.08425	0.006232
43	0.063889	0.00378	0.0155	0.00244609	0.0524444	0.003841	0.033333	0.004398	0.084817	0.006268
44	0.065222	0.004403	0.0155	0.00236291	0.0517778	0.003872	0.032545	0.004281	0.085367	0.006291
45	0.063778	0.004323	0.0151667	0.0023582	0.052	0.004262	0.033182	0.004414	0.085617	0.006279
46	0.063	0.004391	0.0153333	0.0018915	0.052	0.004518	0.034	0.004515	0.086017	0.006348
47	0.063667	0.004314	0.0155	0.0026426	0.0514444	0.004314	0.035646	0.004632	0.086814	0.006384
48	0.062778	0.004878	0.0155	0.00221736	0.0511111	0.004309	0.036185	0.004702	0.087271	0.00642

## Sheet: E
WT:WT_T	WT:WT_C	∆rccR:WT_T	rccR:WT_C	∆rccR:∆hexR_T	∆rccR:∆hexR_C
0.789474	0.705882	0.054795	0.228155	0.044199	0.888889
1	0.857143	0.07326	0.353659	0.137615	2.28986
1.36364	1.05263	0.174545	0.274725	1.83333	0.829268
1.66667	1.125	0.1	0.241379	0.75	1.7541
0.7	1.11111	0.017467	0.367647	0.0492611	0.555556
1	1	0.041494	0.251724	0.227907	0.108696
2	0.888889	0.16	0.443182	0.02518	1.72868
0.2			0.384615	0.057229	0.123457
1.29167			0.300546		0.85
					1
