# Supplementary material for: The genotype of barley cultivars influences multiple aspects of their associated microbiota via differential root exudate secretion
Source: PLoS Biol. 2024 Apr 25;22(4):e3002232. doi: 10.1371/journal.pbio.3002232 (PMC11045101; doi:10.1371/journal.pbio.3002232)
Supplement: S4 Table — (XLSX) [file pbio.3002232.s004.xlsx]

## Sheet: Sheet1
GeneID	Product	control.che.1dpi.logFC	control.che.1dpi.FDR	control.che.5dpi.logFC	control.che.5dpi.FDR	control.ti.1dpi.logFC	control.ti.1dpi.FDR	control.ti.5dpi.logFC	control.ti.5dpi.FDR	che.ti.1dpi.logFC	che.ti.1dpi.FDR	che.ti.5dpi.logFC	che.ti.5dpi.FDR
PFLU_4554	putative cytochrome oxidase subunit	0.510093	0.666702	-0.186827	0.87203	-3.32977	0.0332939	-1.77146	0.179525	-3.83986	0.129712	-1.58464	0.998188
PFLU_1043	putative membrane protein	-1.51753	0.00235516	-1.05542	0.0175908	-5.14473	3.86511e-06	-2.3049	0.000453213	-3.6272	0.0427324	-1.24948	0.739959
PFLU_4463	conserved hypothetical integral membrane protein	5.10571	2.30911e-10	3.80029	4.12894e-09	1.89382	2.005e-05	1.44259	0.000279053	-3.21188	2.2427e-06	-2.3577	0.000256096
PFLU_4555	putative cytochrome C oxidase subunit	1.33814	0.285165	0.185253	0.891612	-1.79721	0.326194	-0.726498	0.663807	-3.13535	0.180715	-0.911751	0.998188
PFLU_5483	putative ABC transport system, outer membrane exported protein	-1.47084	0.15697	-2.40865	0.0274378	-4.11464	0.00212146	-3.60356	0.00424001	-2.64381	0.167129	-1.19491	0.998188
PFLU_1412	probable alcohol dehydrogenase	-3.29833	0.0145294	-3.75157	0.00693161	-5.87236	0.000655943	-4.78383	0.0019416	-2.57403	0.220639	-1.03226	0.998188
PFLU_4556	cb-type cytochrome C oxidase subunit III	0.328852	0.640395	-0.130279	0.849703	-1.79654	0.01993	-0.944534	0.180077	-2.12539	0.107323	-0.814255	0.998188
PFLU_1358	hypothetical protein	-3.19095	8.83625e-05	-4.59138	4.99567e-06	-5.25578	6.96196e-06	-5.28393	8.37876e-06	-2.06484	0.183509	-0.692547	0.998188
PFLU_0652	putative lipoprotein	5.78172	2.34022e-05	4.31769	0.000219002	3.9982	0.000487499	1.6856	0.0677596	-1.78352	0.196897	-2.63209	0.480161
PFLU_4553	probable cytochrome C oxidase subunit	0.593525	0.42866	0.271055	0.718774	-1.01618	0.200087	-0.43466	0.576971	-1.6097	0.186807	-0.705715	0.998188
PFLU_1012	putative exported protein	0.22429	0.730614	0.148406	0.814325	-1.35302	0.102603	-0.59349	0.439873	-1.57731	0.166341	-0.741896	0.998188
PFLU_4721	hypothetical protein	-3.9367	3.84813e-08	-3.87921	3.28592e-08	-5.48208	5.61388e-09	-4.22417	3.52903e-08	-1.54538	0.11418	-0.344955	0.998188
PFLU_4891	arginine deiminase	-0.607753	0.286649	-1.07716	0.0601023	-2.09759	0.00198908	-1.35004	0.0256073	-1.48983	0.145451	-0.272883	0.998188
PFLU_4282	putative endonuclease	1.40382	0.0323172	0.649163	0.337267	0.00480382	0.994767	0.813496	0.260112	-1.39901	0.153124	0.164333	0.998188
PFLU_3239	putative general secretory pathway protein H/U	1.01409	0.0898365	1.19999	0.0386132	-0.371123	0.672981	1.24954	0.0480676	-1.38522	0.145451	0.0495508	0.998391
PFLU_3533	putative exported protein	2.11664	1.96153e-05	0.886675	0.0191059	0.758673	0.0453741	0.897633	0.0186888	-1.35797	0.0671538	0.0109579	0.998391
PFLU_1128	putative aminotransferase	-7.26164	3.49629e-09	-7.51111	1.86364e-09	-8.58724	1.14257e-09	-8.43204	9.33537e-10	-1.3256	0.156264	-0.920927	0.954437
PFLU_2454	putative hydratase	2.37909	3.94869e-06	0.700041	0.0741923	1.06162	0.0119189	0.446315	0.291319	-1.31747	0.0427324	-0.253726	0.998188
PFLU_2452	putative asparagine biosynthesis-related protein	2.50231	6.49294e-06	0.870525	0.0401759	1.23711	0.0068716	0.698928	0.114006	-1.2652	0.0731582	-0.171597	0.998188
PFLU_4568	oxygen-independent coproporphyrinogen III oxidase	-3.17359	0.000565827	-3.52826	0.000223332	-4.43665	5.27875e-05	-4.38584	5.03301e-05	-1.26306	0.317143	-0.857575	0.998188
PFLU_1687	putative methyl-accepting chemotaxis protein	-3.9744	0.00017349	-4.35332	7.48855e-05	-5.22878	2.71763e-05	-4.94046	3.65021e-05	-1.25438	0.362043	-0.587146	0.998188
PFLU_5639	putative membrane protein	3.79492	8.71275e-06	2.08515	0.00381514	2.54114	0.000933757	1.82077	0.0140174	-1.25379	0.134191	-0.26438	0.998188
PFLU_4036	putative 4-aminobutyrate aminotransferase	1.84355	1.30187e-06	0.865352	0.00249112	0.627785	0.0249266	1.16854	0.000224813	-1.21577	0.010723	0.303185	0.998188
PFLU_3529	putative acyl-CoA dehydrogenase	2.33536	9.34317e-07	2.10824	2.63187e-06	1.12782	0.00219369	1.73573	3.19594e-05	-1.20754	0.041025	-0.372502	0.998188
PFLU_1761	ccmD, cytochrome C biogenesis, heme exporter protein	0.0519916	0.927485	-0.911091	0.100125	-1.12632	0.0757584	-0.792942	0.198767	-1.17831	0.180516	0.118149	0.998188
PFLU_1042	fecI, probable RNA polymerase sigma factor	-2.5623	4.56329e-06	-1.4503	0.000575774	-3.737	7.32033e-07	-1.1578	0.00571489	-1.1747	0.207654	0.292501	0.998188
PFLU_1062	recO, DNA repair protein	-0.147429	0.688413	-0.772762	0.0360846	-1.2724	0.00419552	-0.986888	0.0190131	-1.12497	0.101156	-0.214126	0.998188
PFLU_0151	hypothetical protein	0.554494	0.371624	0.522262	0.391987	-0.548298	0.480734	0.557507	0.408445	-1.10279	0.24747	0.0352449	0.998391
PFLU_3198	putative acyl CoA oxidase	2.00321	4.72128e-05	-0.211065	0.580313	0.905593	0.0230395	-0.435137	0.259877	-1.09761	0.107323	-0.224072	0.998188
PFLU_2956	conserved hypothetical protein	0.541679	0.563574	1.63854	0.04064	-0.541528	0.647102	1.79898	0.0365367	-1.08321	0.433236	0.160437	0.998188
PFLU_3194	3-oxoacyl-[acyl-carrier protein] reductase	1.88515	1.27727e-05	-0.250841	0.454565	0.809765	0.01986	-0.620059	0.0880092	-1.07538	0.0715833	-0.369218	0.998188
PFLU_3527	putative dehydratase	0.832378	0.0267904	0.518839	0.155901	-0.242905	0.561315	0.0998027	0.807243	-1.07528	0.0982758	-0.419036	0.998188
PFLU_3538	putative short chain dehydrogenase	1.47419	0.000295107	1.37863	0.0005065	0.40383	0.294822	1.02638	0.0084885	-1.07036	0.0750859	-0.352246	0.998188
PFLU_0973	putative transport-related membrane protein	-2.588	6.94907e-05	-2.87026	2.64125e-05	-3.65728	1.26689e-05	-3.63426	1.76789e-05	-1.06928	0.331416	-0.763995	0.998188
PFLU_3195	putative FAD-binding oxidase	2.10679	1.68733e-05	-0.0295847	0.938211	1.03755	0.00950977	-0.396628	0.319252	-1.06924	0.0934348	-0.367043	0.998188
PFLU_2126	[utative peptidase	-1.57166	0.00390029	-1.88971	0.00100194	-2.6329	0.000180866	-2.40196	0.000398063	-1.06125	0.257117	-0.512251	0.998188
PFLU_0787	conserved hypothetical protein	-2.6389	0.00140983	-3.13664	0.000361398	-3.68519	0.000187015	-3.66052	0.00019719	-1.04629	0.411629	-0.523879	0.998188
PFLU_3199	3-oxoacyl-[acyl-carrier-protein] synthase II	0.613105	0.107213	-1.76212	0.000157309	-0.417552	0.275559	-2.19062	2.34696e-05	-1.03066	0.122581	-0.428509	0.998188
PFLU_4305	L-lactate dehydrogenase	3.24428	3.25768e-05	0.382206	0.52832	2.21647	0.00119597	1.63664	0.0100351	-1.02781	0.2253	1.25444	0.728453
PFLU_3903	putative exported protein	-1.80932	3.79862e-06	-3.4629	2.42362e-09	-2.83162	4.69732e-08	-3.49773	5.5581e-09	-1.02231	0.0761736	-0.0348249	0.998391
PFLU_3200	putative acyl carrier protein	2.09056	2.97021e-06	-0.50972	0.119464	1.06889	0.00267863	-1.02451	0.00751785	-1.02167	0.0746322	-0.514792	0.990668
PFLU_6022	conserved hypothetical protein	4.34198	1.46138e-07	2.39909	0.00062551	3.32525	1.52243e-05	2.70287	0.00028107	-1.01673	0.0834528	0.303783	0.998188
PFLU_4892	ornithine carbamoyltransferase, catabolic	-0.1502	0.704335	-0.383877	0.303218	-1.16277	0.00582667	-0.60887	0.111841	-1.01257	0.130955	-0.224993	0.998188
PFLU_3196	putative 2-hydroxyhepta-2,4-diene-1,7-dioate isomerase	1.65981	8.84807e-05	-0.408565	0.234562	0.647437	0.0658775	-0.710557	0.053459	-1.01237	0.0934348	-0.301993	0.998188
PFLU_5091	putative chemotaxis protein CheW	-3.46197	1.10042e-09	-5.12901	2.06719e-11	-4.473	1.91855e-10	-5.96991	2.38966e-11	-1.01103	0.0934348	-0.840905	0.871469
PFLU_1177	hypothetical phage-related protein	0.117137	0.778363	-0.288559	0.475679	-0.89082	0.0591955	-1.09856	0.0291017	-1.00796	0.148009	-0.81	0.91064
PFLU_2615	putative membrane protein	1.57719	0.000847722	0.374553	0.356655	0.573618	0.169445	0.0664072	0.877151	-1.00357	0.146395	-0.308146	0.998188
PFLU_1172	hypothetical phage-related protein	0.042394	0.908115	0.121477	0.719959	-0.949473	0.0209229	-0.358787	0.343984	-0.991867	0.112096	-0.480264	0.990668
PFLU_5139	cytochrome C oxidase (ubiquinol oxidase) subunit I	2.43455	4.49051e-06	2.20722	1.0768e-05	1.4445	0.00085497	1.69958	0.000174788	-0.990047	0.117624	-0.50764	0.990668
PFLU_4893	carbamate kinase	0.637875	0.08682	0.423583	0.246854	-0.342702	0.388684	0.0153261	0.970895	-0.980577	0.125207	-0.408257	0.998188
PFLU_3197	conserved hypothetical protein	1.78134	0.000401266	-0.596391	0.184478	0.801048	0.0739037	-0.773876	0.112155	-0.980294	0.148009	-0.177485	0.998188
PFLU_3143	putative HlyD family secretion protein	-0.103438	0.787246	-0.524672	0.154927	-1.07542	0.0146317	-0.293893	0.461458	-0.971985	0.138737	0.230779	0.998188
PFLU_0590	putative iron ABC transport system, permease	-0.795588	0.0118317	-1.36234	0.000234087	-1.7361	8.12737e-05	-1.172	0.00200633	-0.940508	0.11921	0.190341	0.998188
PFLU_4502	conserved hypothetical protein	4.95645	7.69591e-08	5.98888	6.34284e-09	4.03423	9.87391e-07	5.85476	9.06794e-09	-0.922224	0.183509	-0.134116	0.998188
PFLU_3660	putative membrane protein	0.766935	0.00809271	-0.0789193	0.800037	-0.15014	0.686171	-0.0170044	0.987533	-0.917075	0.0715833	0.0619149	0.998188
PFLU_4890	arginine/ornithine antiporter	-0.760605	0.0729	-0.760418	0.0685326	-1.67728	0.00106011	-0.986963	0.0274376	-0.916672	0.192067	-0.226545	0.998188
PFLU_4872	conserved hypothetical protein	-0.414095	0.143398	-0.883209	0.00370819	-1.32863	0.000150728	-0.844982	0.00537824	-0.914531	0.0846744	0.0382275	0.998188
PFLU_3528	putative 3-oxoacyl acyl carrier protein reductase	1.16727	0.00121776	0.987829	0.00408026	0.257972	0.455126	0.933805	0.0076929	-0.909302	0.100451	-0.0540247	0.998188
PFLU_5888	putative ABC transport system, exported protein	-0.564319	0.155206	-0.865068	0.0330296	-1.46554	0.00239751	-1.5182	0.00201329	-0.901219	0.183509	-0.653136	0.990668
PFLU_2235	putative ABC transport system, membrane protein	0.982836	0.160514	1.25484	0.0630559	0.0817654	0.929746	1.27009	0.0857778	-0.901071	0.348013	0.0152543	0.998391
PFLU_0702	putative outer membrane protein	4.26977	1.91533e-08	2.82231	2.24455e-06	3.36873	3.79518e-07	2.20286	4.81724e-05	-0.901038	0.138737	-0.619452	0.923402
PFLU_0697	putative metal transport-related exported protein	2.87691	1.2566e-07	1.41259	0.000543984	1.98218	2.16054e-05	0.841339	0.0350748	-0.894724	0.0813883	-0.571248	0.883908
PFLU_4007	viscA, putative non-ribosomal peptide synthetase	0.209878	0.391301	-0.446329	0.0683227	-0.684574	0.011469	-0.395605	0.119064	-0.894452	0.0671538	0.0507238	0.998188
PFLU_0699	czcA, cobalt-zinc-cadmium resistance membrane protein	2.80547	3.19844e-06	1.57599	0.00122136	1.91113	0.000281604	1.01964	0.0315089	-0.894334	0.147077	-0.556345	0.990668
PFLU_3642	putative transmembrane two-component sensor histidine kinase transcriptional regulatory protein	-0.117211	0.765062	0.221163	0.539235	-1.01078	0.0267286	0.582251	0.121293	-0.893568	0.167298	0.361088	0.998188
PFLU_3526	putative 3-ketoacyl-CoA thiolase	1.26613	0.00107281	1.00144	0.00615327	0.379984	0.309821	0.503056	0.173478	-0.886147	0.114051	-0.498385	0.989476
PFLU_0703	8.0.1	4.22323	1.06262e-09	3.61849	6.38454e-09	3.33904	3.38155e-08	3.25543	3.81054e-08	-0.884195	0.0750859	-0.363061	0.990972
PFLU_6024	conserved hypothetical protein	2.17525	2.07589e-06	0.441687	0.200517	1.29196	0.000971096	0.344323	0.361729	-0.883291	0.0813883	-0.0973649	0.998188
PFLU_5138	cytochrome C oxidase (ubiquinol oxidase) subunit III	2.76907	2.60992e-07	2.40145	1.25328e-06	1.90599	2.92085e-05	2.14549	6.44745e-06	-0.863083	0.108738	-0.255967	0.998188
PFLU_5140	cytochrome C oxidase (ubiquinol oxidase) subunit II	2.89157	1.15547e-05	2.81853	1.28397e-05	2.03046	0.000499769	2.49777	5.59876e-05	-0.861111	0.204174	-0.320757	0.998188
PFLU_4769	conserved hypothetical protein	-0.9084	0.00754045	-1.60108	7.83182e-05	-1.76274	6.88873e-05	-1.71904	9.43673e-05	-0.854343	0.148009	-0.117959	0.998188
PFLU_6025	clpB2, chaperone	2.7898	1.29957e-09	0.693407	0.00622209	1.93547	2.097e-07	0.764359	0.0043646	-0.854328	0.0346286	0.0709522	0.998188
PFLU_1127	putative phosphoserine phosphatase	-6.91107	5.46591e-11	-6.70514	4.81053e-11	-7.76517	2.78203e-11	-7.3083	3.16236e-11	-0.854106	0.191365	-0.603159	0.990668
PFLU_1786	phnL, phosphonates ABC transport system, ATP-binding protein	0.37624	0.631326	0.213753	0.782593	-0.46963	0.613087	0.76111	0.332878	-0.84587	0.464569	0.547357	0.998188
PFLU_2043	putative ABC transport system, ATP-binding protein	-0.652875	0.067705	-1.11615	0.00420336	-1.4926	0.00114371	-1.75201	0.000451062	-0.839725	0.181096	-0.635864	0.990668
PFLU_6041	putative transport-related membrane protein	2.83394	1.25985e-08	2.22384	2.48252e-07	1.99476	1.70075e-06	2.2815	2.45197e-07	-0.839178	0.067343	0.0576544	0.998188
PFLU_0164	putative lipoprotein	0.810551	0.000505518	0.00565155	0.978266	-0.027401	0.906615	-0.0899854	0.686705	-0.837952	0.0346286	-0.095637	0.998188
PFLU_2918	putative lipoprotein	-3.94831	2.04129e-11	-4.05424	1.0705e-11	-4.78541	7.10666e-12	-4.3258	1.11198e-11	-0.837104	0.0834528	-0.271567	0.998188
PFLU_5094	conserved hypothetical protein	-3.68077	4.79883e-09	-5.53711	1.06362e-10	-4.51748	1.58503e-09	-5.72742	2.93427e-10	-0.83671	0.18551	-0.190314	0.998188
PFLU_3229	putative secreted pectate lyase	0.941222	0.00282063	-0.167197	0.572997	0.114495	0.722116	-0.479134	0.133553	-0.826727	0.100451	-0.311938	0.998188
PFLU_4074	putative general secretion pathway protein K	0.486832	0.529231	1.2327	0.0758178	-0.339271	0.721821	1.60779	0.0294123	-0.826103	0.465701	0.375085	0.998188
PFLU_4048	putative oxidoreductase	0.497288	0.0695757	-0.293274	0.274151	-0.32134	0.244208	-0.0586091	0.834132	-0.818627	0.099753	0.234665	0.998188
PFLU_4049	putative dehalogenase	1.11009	3.475e-05	0.268438	0.194989	0.294631	0.169098	0.530796	0.0158236	-0.815462	0.0464599	0.262359	0.998188
PFLU_3814	conserved hypothetical protein	1.22587	0.00366689	1.4682	0.00076386	0.413123	0.312198	1.25253	0.00349429	-0.812749	0.17169	-0.215677	0.998188
PFLU_4245	hypothetical protein	0.0246696	0.957583	-0.155692	0.699219	-0.785178	0.0869133	-0.140602	0.751439	-0.809847	0.204812	0.0150907	0.998391
PFLU_1283	lpxB, lipid-A-disaccharide synthase	-0.514906	0.0194739	-0.954351	0.000182728	-1.32406	1.12937e-05	-0.918127	0.000378241	-0.809152	0.0671538	0.0362246	0.998188
PFLU_4625	putative O-acetylserine (thiol)-lyase	2.14123	5.07839e-06	1.26491	0.000923859	1.33493	0.000757586	1.20697	0.0016627	-0.806306	0.137196	-0.0579404	0.998188
PFLU_0127	hypothetical protein	0.186909	0.626045	-0.0418026	0.911046	-0.619033	0.139226	-0.176337	0.670779	-0.805941	0.180141	-0.134534	0.998188
PFLU_3661	putative lipoprotein	1.80453	3.75902e-05	1.31034	0.000978053	1.00824	0.0119767	0.860023	0.0320889	-0.796292	0.114051	-0.450314	0.990668
PFLU_0698	putative metal transport-related exported protein	4.17551	1.01439e-06	2.05034	0.004179	3.37972	2.63592e-05	1.50406	0.048518	-0.795792	0.192967	-0.54628	0.998188
PFLU_5643	putative acyltransferase	0.88721	0.0010602	0.414792	0.0857397	0.0928914	0.733295	0.478018	0.0611813	-0.794319	0.0743606	0.0632254	0.998188
PFLU_3242	conserved hypothetical protein	0.930699	0.0572957	0.869298	0.0710392	0.141301	0.807512	0.718944	0.162815	-0.789398	0.254992	-0.150354	0.998188
PFLU_4627	putative alanyl-tRNA synthetase	2.00845	3.53865e-05	0.967551	0.0129205	1.22212	0.00333479	0.823291	0.0334551	-0.786326	0.17793	-0.14426	0.998188
PFLU_4624	putative sulfurylase	2.05919	1.08984e-05	1.38918	0.000481006	1.27337	0.0012527	1.29054	0.00101705	-0.785819	0.156264	-0.0986328	0.998188
PFLU_6080	putative lipoprotein	1.05821	0.00428966	0.197253	0.578549	0.273975	0.468039	0.050625	0.897352	-0.784237	0.147077	-0.146628	0.998188
PFLU_6023	conserved hypothetical protein	2.79485	3.182e-06	1.06203	0.0230014	2.01289	0.000194601	0.945139	0.0549554	-0.781964	0.167298	-0.116895	0.998188
PFLU_5137	cytochrome C oxidase (ubiquinol oxidase) subunit IV	2.11968	8.36367e-06	1.76319	6.13181e-05	1.33937	0.00149495	1.32795	0.00162664	-0.780311	0.131933	-0.435245	0.990668
PFLU_1048	conserved hypothetical protein	1.16837	0.00728756	1.32106	0.00254443	0.391125	0.408535	0.780118	0.088521	-0.777242	0.175994	-0.540942	0.985529
PFLU_4626	putative serine acetyltransferase	2.19325	5.97437e-06	1.31311	0.000921069	1.41655	0.000620261	1.03766	0.00677931	-0.776697	0.15433	-0.275446	0.998188
PFLU_5700	putative exported protein	0.209556	0.728424	0.719166	0.182522	-0.565531	0.408111	1.06656	0.0616658	-0.775087	0.381144	0.347391	0.998188
PFLU_6092	hisI, phosphoribosyl-AMP cyclohydrolase	0.950737	0.0417145	0.767756	0.0936865	0.182175	0.734932	0.52668	0.291061	-0.768562	0.246051	-0.241076	0.998188
PFLU_3247	putative outer membrane adhesin activator protein	-0.0747447	0.807127	-1.15814	0.00060086	-0.842603	0.00880574	-1.35707	0.000267527	-0.767859	0.130034	-0.198934	0.998188
PFLU_6015	conserved hypothetical protein	2.10502	1.37987e-06	0.184364	0.56443	1.33989	0.000306649	0.469691	0.154894	-0.765129	0.107323	0.285326	0.998188
PFLU_3193	pyruvate dehydrogenase E1 component	1.12895	9.72481e-05	-0.441989	0.0607142	0.366318	0.124631	-0.437349	0.0689126	-0.762628	0.0813883	0.00463943	0.998391
PFLU_3952	putative C4-dicarboxylate transporter, small subunit	-1.22729	0.00273155	-1.46564	0.000685612	-1.98828	0.000187015	-1.73936	0.000614347	-0.760995	0.280727	-0.273722	0.998188
PFLU_1413	putative transport-related memebrane protein	-1.21441	0.00402257	-1.39831	0.00131643	-1.97525	0.000135206	-1.27361	0.00393133	-0.760835	0.250253	0.124694	0.998188
PFLU_2044	putative exported protein	-0.131848	0.792302	0.0683704	0.883587	-0.888429	0.104408	-0.290699	0.58246	-0.75658	0.323384	-0.359069	0.998188
PFLU_1655	conserved hypothetical protein	1.46035	1.46237e-06	0.653314	0.00434842	0.706214	0.00346901	0.50303	0.029156	-0.754135	0.0473992	-0.150284	0.998188
PFLU_3677	tyrosine-protein kinase	2.86896	2.34847e-08	2.37844	2.18332e-07	2.12332	1.57714e-06	2.19473	8.87459e-07	-0.745638	0.0975429	-0.18371	0.998188
PFLU_1179	putative phage tail-related protein	0.891343	0.00361169	0.496492	0.0799253	0.147414	0.637723	0.156095	0.617774	-0.743929	0.114051	-0.340397	0.998188
PFLU_5147	putative exported protein	1.65559	0.00110553	0.389694	0.393694	0.912453	0.0543269	1.01341	0.0330407	-0.743137	0.250253	0.623714	0.990668
PFLU_6012	conserved hypothetical protein	1.41653	0.00161053	0.498019	0.240834	0.673981	0.134946	0.517906	0.263435	-0.742553	0.181412	0.0198872	0.998391
PFLU_0400	conserved hypothetical protein	1.5675	3.0442e-05	1.78273	5.77227e-06	0.828393	0.0104199	1.71031	1.25854e-05	-0.739107	0.116692	-0.0724215	0.998188
PFLU_5604	putative aminotransferase	1.65194	0.00546284	2.5788	0.000118233	0.919508	0.109609	1.29744	0.0250115	-0.732436	0.361335	-1.28136	0.616112
PFLU_4995	putative lipoprotein	2.39206	3.02743e-08	1.96375	3.40817e-07	1.66033	5.09095e-06	1.91968	7.28267e-07	-0.731729	0.0743606	-0.0440643	0.998188
PFLU_3662	putative polysaccharide export protein	2.66016	5.66726e-08	2.00664	2.00263e-06	1.92974	5.56999e-06	1.75823	1.75039e-05	-0.73042	0.0934348	-0.248405	0.998188
PFLU_0467	putative lipopolysaccharide biosynthesis-related protein	1.71955	1.6129e-05	1.12326	0.00124726	0.989592	0.00542321	1.10445	0.0024144	-0.729957	0.109954	-0.0188111	0.998391
PFLU_3536	putative family S33 unassigned peptidase	0.171446	0.406562	-0.0505893	0.807336	-0.557339	0.0124204	-0.243717	0.242006	-0.728786	0.0715833	-0.193128	0.998188
PFLU_0108	conserved hypothetical protein	-0.144568	0.849898	0.327484	0.628733	-0.872797	0.287003	0.574474	0.419577	-0.728229	0.530339	0.246989	0.998188
PFLU_2552	viscB, putative non-ribosomal peptide synthetase	0.403345	0.139137	-0.145004	0.5967	-0.319281	0.262046	0.0311048	0.914041	-0.722627	0.126115	0.176109	0.998188
PFLU_3534	putative exported protein	0.921756	0.0027675	1.04859	0.000869143	0.205057	0.493033	0.913974	0.00330679	-0.7167	0.126115	-0.134612	0.998188
PFLU_6113	hypothetical protein	0.988628	0.0391432	0.299352	0.548206	0.273666	0.622434	0.380868	0.484464	-0.714961	0.272331	0.0815157	0.998188
PFLU_4767	putative exported protein	0.355131	0.553313	0.227274	0.70105	-0.356873	0.594236	-0.189323	0.775816	-0.712004	0.430032	-0.416597	0.998188
PFLU_3393	conserved hypothetical protein	-0.757998	0.00200462	-1.73557	4.40451e-07	-1.46675	5.41594e-06	-1.74098	8.14869e-07	-0.708752	0.0934348	-0.00540698	0.998391
PFLU_3201	3-oxoacyl-[acyl-carrier-protein] synthase	0.956057	0.00125846	-0.800026	0.00474563	0.247376	0.355732	-1.05227	0.000693915	-0.708681	0.122049	-0.252246	0.998188
PFLU_6120	atpA, ATP synthase alpha chain	1.83703	4.06431e-09	1.04562	3.323e-06	1.12876	1.84346e-06	0.870016	2.81731e-05	-0.70827	0.0345948	-0.175604	0.998188
PFLU_6121	atpH, ATP synthase delta chain	2.12307	2.43263e-10	1.2121	2.28242e-07	1.41509	4.82367e-08	1.21346	2.61066e-07	-0.707977	0.0129174	0.00136537	0.998705
PFLU_4533	peptidyl-prolyl cis-trans isomerase A	0.405059	0.0966263	-0.191443	0.430637	-0.302916	0.232524	-0.65961	0.0148275	-0.707974	0.104675	-0.468167	0.86393
PFLU_0650	putative response regulator	-0.293176	0.248419	-2.60772	1.98092e-08	-0.999976	0.000775228	-2.94055	7.89748e-09	-0.706799	0.117624	-0.332827	0.998188
PFLU_6019	conserved hypothetical protein	1.99882	3.20075e-06	0.337828	0.279086	1.29446	0.000429187	0.193149	0.566052	-0.704365	0.137196	-0.14468	0.998188
PFLU_2721	putative efflux system inner membrane protein	1.61505	0.00120825	1.58861	0.00125159	0.913282	0.0643315	1.3029	0.00949569	-0.701764	0.239229	-0.285708	0.998188
PFLU_4542	hypothetical protein	0.00766799	0.989347	0.101063	0.818704	-0.690988	0.168432	0.340257	0.458027	-0.698656	0.314733	0.239193	0.998188
PFLU_4090	iron(III) dicitrate transport system permease protein	0.779685	0.0462169	0.813355	0.0352353	0.083287	0.902573	0.973241	0.0203946	-0.696398	0.204812	0.159886	0.998188
PFLU_6084	conserved hypothetical protein	0.357777	0.255058	-0.00109694	0.996862	-0.334032	0.337743	-0.751431	0.0440746	-0.691809	0.168504	-0.750334	0.728453
PFLU_2791	putative substrate-binding transport protein	-1.77975	0.000250856	-0.771943	0.0439698	-2.47023	4.10877e-05	-0.994314	0.0203201	-0.690478	0.375956	-0.222372	0.998188
PFLU_3902	putative fimbriae-assembly chaperone	-1.99478	1.29509e-08	-3.30286	2.76822e-11	-2.68157	6.03615e-10	-3.52533	2.72167e-11	-0.686787	0.0761736	-0.222466	0.998188
PFLU_0651	putative exported protein	-1.69166	1.05997e-07	-3.44885	1.70147e-11	-2.37743	2.15002e-09	-3.44726	2.27297e-11	-0.685763	0.0743606	0.00158964	0.998705
PFLU_3457	conserved hypothetical protein	-0.143278	0.629103	-0.577528	0.0482914	-0.826064	0.0126912	-0.278768	0.361275	-0.682786	0.158199	0.29876	0.998188
PFLU_3242A	hypothetical protein	1.03903	0.109374	0.981502	0.125965	0.357499	0.637863	0.612211	0.402367	-0.681531	0.434901	-0.36929	0.998188
PFLU_4623	putative membrane protein	2.69211	1.84262e-07	2.43167	5.17059e-07	2.01179	7.3164e-06	2.12384	3.30084e-06	-0.680318	0.156264	-0.307827	0.998188
PFLU_1129	putative lipase	-7.4389	2.8603e-10	-7.41187	2.05684e-10	-8.11885	2.0796e-10	-8.34912	1.288e-10	-0.679958	0.400073	-0.937254	0.922796
PFLU_3486	tRNA hydroxylase	1.40235	0.00439216	1.11544	0.0190036	0.725138	0.15301	1.16538	0.0214249	-0.677207	0.264053	0.0499345	0.998188
PFLU_6027	conserved hypothetical protein	2.24886	8.6853e-05	-0.142998	0.805175	1.57589	0.004254	0.765978	0.17333	-0.672965	0.230594	0.908976	0.867981
PFLU_2233	putative aspartate aminotransferase	-0.727692	0.251679	0.393983	0.48298	-1.39759	0.0667735	0.413995	0.501899	-0.669901	0.558133	0.0200113	0.998391
PFLU_5523	rpsS, 30S ribosomal protein S19	2.65671	2.35681e-08	2.66622	1.66469e-08	1.99141	9.08394e-07	2.69825	1.62888e-08	-0.665299	0.126115	0.0320329	0.998188
PFLU_1124	putative membrane protein	-5.74672	2.14303e-09	-5.87992	1.35794e-09	-6.41089	4.71869e-09	-5.1209	1.63895e-08	-0.664173	0.668599	0.759018	0.998188
PFLU_3240	putative general secretion pathway protein J/W	1.05957	0.0829411	1.1591	0.0531572	0.398617	0.578383	0.89118	0.179525	-0.660957	0.410551	-0.267915	0.998188
PFLU_0431	putative glycosyl-transferase (pseudogene)	0.0192405	0.943979	-0.282968	0.234776	-0.641217	0.0168018	-0.59722	0.0255025	-0.660458	0.117624	-0.314253	0.998188
PFLU_4089	iron(III) dicitrate transport system permease protein	0.744587	0.0287115	0.810663	0.016658	0.0852875	0.843419	1.0405	0.00510587	-0.659299	0.176562	0.229836	0.998188
PFLU_6021	conserved hypothetical protein	2.67775	2.3161e-09	0.715565	0.00470901	2.02053	1.15547e-07	0.628482	0.0148004	-0.657216	0.0823812	-0.0870832	0.998188
PFLU_0594	putative membrane protein	-4.52005	9.00762e-11	-4.59457	5.3637e-11	-5.17603	6.42959e-11	-4.91758	8.83751e-11	-0.655981	0.275738	-0.323011	0.998188
PFLU_0646	conserved hypothetical protein	-1.92227	4.19581e-08	-3.59858	2.24394e-11	-2.57808	1.85263e-09	-3.38962	7.5689e-11	-0.655812	0.0934348	0.208956	0.998188
PFLU_4466	patatin-like phospholipase	0.360494	0.112689	0.100349	0.659007	-0.29504	0.209513	-0.0992819	0.675222	-0.655535	0.107672	-0.199631	0.998188
PFLU_3999	putative exported protein	0.393151	0.0999952	0.184949	0.431131	-0.262381	0.276963	-0.542694	0.0275127	-0.655532	0.117366	-0.727644	0.441773
PFLU_3545	putative outer membrane protein	-0.917285	0.0744225	-1.66068	0.0047449	-1.57005	0.0130057	-1.15131	0.0536081	-0.652769	0.478975	0.50937	0.998188
PFLU_3535	putative alkane monooxygenase	1.32314	1.90865e-06	1.6781	8.18057e-08	0.671644	0.00204405	1.57162	2.16174e-07	-0.651496	0.0746322	-0.106478	0.998188
PFLU_6069	conserved hypothetical protein (pseudogene)	0.183835	0.738217	0.389067	0.444961	-0.465163	0.44452	0.0331067	0.956534	-0.648998	0.41543	-0.35596	0.998188
PFLU_5921	putative lipoprotein	0.179535	0.601312	-0.10566	0.763746	-0.466539	0.246855	-0.0462453	0.911463	-0.646074	0.208489	0.0594147	0.998188
PFLU_0704	putative chemotaxis protein	-1.42867	1.60308e-05	-2.0375	2.38969e-07	-2.07391	3.06456e-07	-2.35904	5.68167e-08	-0.645243	0.139675	-0.321531	0.998188
PFLU_6105	putative phospholipid biosynthesis-related protein	0.784999	0.00151053	-0.254991	0.263966	0.139901	0.564894	0.167822	0.482707	-0.645098	0.0934348	0.422813	0.86393
PFLU_1046	putative RNA polymerase sigma factor	-1.55683	0.000528974	-1.64442	0.000307389	-2.20113	8.69615e-05	-1.54239	0.00141373	-0.644301	0.383798	0.102028	0.998188
PFLU_0339	grxC, glutaredoxin 3	1.80739	3.17035e-06	1.50033	2.46584e-05	1.16376	0.000576004	1.32695	0.000152198	-0.643631	0.124292	-0.17338	0.998188
PFLU_3985	putative ABC transport system, ATP-bidning protein	-0.641974	0.1396	-1.1614	0.0125213	-1.28124	0.011894	-0.885605	0.0652924	-0.639264	0.377653	0.275794	0.998188
PFLU_5519	rpmC, 50S ribosomal protein L29	2.82311	1.18429e-10	2.68608	1.55812e-10	2.18433	4.09698e-09	2.7062	1.70679e-10	-0.638778	0.0607866	0.0201227	0.998188
PFLU_2950	conserved hypothetical protein	-0.49173	0.0537777	-0.469356	0.0600839	-1.12988	0.000470936	-0.581655	0.0338475	-0.638154	0.151447	-0.112299	0.998188
PFLU_3128	putative two-component system, sensory histidine kinase	-0.474161	0.138193	-1.40822	0.000246988	-1.11146	0.00240885	-1.4275	0.000310685	-0.637301	0.217367	-0.0192738	0.998391
PFLU_3670	putative acyl transferase, colanic acid synthesis	0.499256	0.294021	-0.353296	0.48298	-0.137919	0.810128	-0.195166	0.727411	-0.637175	0.365748	0.15813	0.998188
PFLU_3144	putative transmembrane ABC transporter component	-0.11155	0.703859	-0.917501	0.00363044	-0.748672	0.0194846	-1.35962	0.000483426	-0.637122	0.17169	-0.442123	0.998188
PFLU_6119	atpG, ATP synthase gamma chain	1.61345	9.13658e-10	0.795767	5.04272e-06	0.977	6.2006e-07	0.557814	0.000253599	-0.636446	0.00946649	-0.237953	0.86393
PFLU_0642	putative lipoprotein	-2.04256	1.98875e-09	-3.92888	1.0834e-12	-2.6786	1.19233e-10	-3.52956	5.24401e-12	-0.63604	0.0715833	0.399329	0.825229
PFLU_2654	putative NADH oxidoreductase	1.09728	0.00251411	1.67208	4.75554e-05	0.463352	0.171747	1.41599	0.000296375	-0.63393	0.208489	-0.256092	0.998188
PFLU_3674	putative lipopolysaccharide biosinthesis-related acetyltransferase	2.75576	2.73339e-05	1.85545	0.00211561	2.12286	0.000932396	1.52581	0.0166014	-0.632903	0.254288	-0.329643	0.998188
PFLU_0731	putative ribosomal protein L25p family	2.36307	1.06983e-09	2.34312	8.39346e-10	1.73094	5.89741e-08	2.2603	1.51148e-09	-0.632128	0.0743606	-0.0828109	0.998188
PFLU_4039	putative succinate-semialdehyde dehydrogenase [NADP+]	-0.0153047	0.962146	-1.0351	0.00115388	-0.643765	0.0313243	-0.624697	0.0353664	-0.628461	0.170141	0.410399	0.990668
PFLU_3719	putative lipoprotein	0.980648	0.0688428	2.29082	8.4784e-05	0.352541	0.572764	2.12035	0.000348785	-0.628107	0.380011	-0.170468	0.998188
PFLU_4903	putative fatty acid transport system, membrane protein	0.0557852	0.911459	-0.13058	0.779232	-0.570756	0.244446	0.486603	0.291072	-0.626541	0.380613	0.617183	0.990972
PFLU_1656	putative membrane protein	0.706328	0.0341622	0.504677	0.119972	0.0810734	0.831847	0.399852	0.250438	-0.625255	0.197125	-0.104825	0.998188
PFLU_3532	putative fatty acid transport system, membrane protein	0.440671	0.0705911	0.602565	0.0151878	-0.181649	0.470325	0.544295	0.0282581	-0.62232	0.134522	-0.0582702	0.998188
PFLU_2047	conserved hypothetical protein	-0.968793	0.01622	-1.58994	0.000590925	-1.59077	0.00132768	-1.16995	0.00982367	-0.621974	0.359862	0.419984	0.998188
PFLU_6011	putative phosphatase	0.465348	0.365901	-0.485529	0.377515	-0.155583	0.801533	-1.05875	0.111406	-0.620931	0.407128	-0.573224	0.998188
PFLU_0159	putative exported protein	0.345747	0.127144	0.351463	0.115099	-0.274891	0.280663	0.455587	0.0569048	-0.620637	0.112096	0.104123	0.998188
PFLU_5896	putative exported protein	-1.57202	3.03225e-06	-1.32542	1.48233e-05	-2.19133	2.60055e-07	-1.4083	2.23966e-05	-0.619316	0.176562	-0.0828864	0.998188
PFLU_1851	pyrF, orotidine 5-phosphate decarboxylase	1.07366	8.53207e-05	1.06008	8.35471e-05	0.45646	0.0493044	0.859004	0.000799623	-0.617197	0.107323	-0.201074	0.998188
PFLU_5096	putative chemotaxis-related protein	-3.65302	1.39689e-12	-5.23722	7.12595e-14	-4.27012	5.20686e-13	-4.96151	1.29089e-13	-0.617098	0.067343	0.275711	0.990668
PFLU_1740	putative two-component system, response regulator	-0.151134	0.854402	-0.058282	0.938273	-0.766377	0.39378	0.408281	0.606972	-0.615243	0.623639	0.466563	0.998188
PFLU_3843	conserved hypothetical protein	1.55749	0.000136128	1.42781	0.000294741	0.942495	0.0131864	1.40003	0.000568537	-0.614991	0.182305	-0.0277732	0.998391
PFLU_6118	atpD, ATP synthase beta chain	1.39816	3.67115e-08	0.630382	0.000264668	0.783397	3.74815e-05	0.498199	0.00212813	-0.614764	0.041025	-0.132183	0.998188
PFLU_1726	deaD, cold-shock dead-box protein A	1.67528	1.49939e-06	1.51215	4.07626e-06	1.06247	0.00023207	1.32601	2.02401e-05	-0.61281	0.126115	-0.186143	0.998188
PFLU_0331	hisF, imidazole glycerol phosphate synthase subunit	0.913666	0.000201262	0.800847	0.000620358	0.301014	0.163167	0.720694	0.00203856	-0.612652	0.0924523	-0.0801522	0.998188
PFLU_0308	wssI, cell morphology-related protein	-1.84482	1.33905e-08	-2.60871	1.8313e-10	-2.45648	1.05988e-09	-2.62838	4.99308e-10	-0.611661	0.098838	-0.0196729	0.998391
PFLU_5526	rplD, 50S ribosomal protein L4	3.00385	3.96916e-10	3.16533	1.53962e-10	2.39285	6.85026e-09	3.0783	2.34729e-10	-0.610997	0.107323	-0.087022	0.998188
PFLU_0794	putative pilus biosynthesis-related protein	-0.21832	0.200666	-0.447694	0.0118972	-0.829242	0.000156495	-0.465091	0.0126823	-0.610922	0.0742956	-0.017397	0.998391
PFLU_4658	putative acyltransferase	0.55184	0.0650966	0.12044	0.692234	-0.0573544	0.869379	0.0370604	0.91165	-0.609195	0.180411	-0.08338	0.998188
PFLU_1171	putative phage assembly-related protein	0.559519	0.193505	0.317346	0.462884	-0.0495397	0.923065	-0.135999	0.783908	-0.609059	0.336738	-0.453345	0.998188
PFLU_4674	putative lipoprotein	1.85596	0.000188013	1.60276	0.000727471	1.24842	0.00831765	1.57867	0.00130158	-0.607542	0.256101	-0.0240935	0.998391
PFLU_1170	hypothetical phage-related protein	1.07234	0.0102189	0.966508	0.0178318	0.472807	0.275161	0.452508	0.299443	-0.599534	0.285358	-0.514	0.990972
PFLU_0313	putative amino acid ABC transport system, membrane protein	0.791389	0.000600111	0.775929	0.000639238	0.192725	0.350793	0.543454	0.0106447	-0.598665	0.0953324	-0.232476	0.998188
PFLU_0647	putative type II secretion system protein	-1.6122	4.19581e-08	-2.57612	1.05231e-10	-2.2097	1.26014e-09	-2.4299	3.10786e-10	-0.597505	0.0761736	0.146218	0.998188
PFLU_5090	chemotaxis response, glutamate methyltransferase	-2.97378	3.1328e-09	-4.43268	4.80406e-11	-3.56925	1.05439e-09	-4.57399	1.25001e-10	-0.595472	0.209784	-0.14131	0.998188
PFLU_4819	putative methyl-accepting chemotaxis protein	-1.291	7.86255e-07	-3.00408	2.38605e-11	-1.88619	1.03928e-08	-2.86681	6.87092e-11	-0.595188	0.0800149	0.137266	0.998188
PFLU_1415	putative LysR-family regulatory protein	-0.579921	0.0115928	-0.861016	0.000617133	-1.17341	6.96528e-05	-1.07829	0.00015731	-0.593489	0.134191	-0.217273	0.998188
PFLU_5535	rplL, 50S ribosomal protein L7/L12	3.5476	1.02438e-12	3.68293	3.89615e-13	2.95584	6.55148e-12	3.55591	6.29734e-13	-0.591768	0.041025	-0.127024	0.998188
PFLU_0260	envZ, osmolarity-sensing histidine-kinase	0.750469	0.00756001	0.453135	0.0844126	0.163472	0.561328	0.1957	0.473873	-0.586997	0.16661	-0.257435	0.998188
PFLU_3623	putative SCO1/SenC family protein	1.71648	8.04853e-07	2.00832	8.18057e-08	1.13105	0.00014463	1.91608	2.16174e-07	-0.585433	0.112096	-0.0922396	0.998188
PFLU_3680	hypothetical protein	1.37572	0.036241	0.90308	0.170185	0.790628	0.269942	0.704127	0.334923	-0.585093	0.482946	-0.198953	0.998188
PFLU_0910	putative lipoprotein	-4.21379	2.63929e-11	-4.518	9.45558e-12	-4.79806	1.55815e-11	-4.31645	3.01115e-11	-0.584276	0.208489	0.201551	0.998188
PFLU_5252	ribosome-binding factor A	2.43148	2.84719e-09	2.52997	1.1425e-09	1.84744	2.08197e-07	2.10213	2.79003e-08	-0.584039	0.0761736	-0.427847	0.616112
PFLU_3624	putative exported protein	1.23891	0.000121852	1.34479	4.33594e-05	0.654883	0.0232794	1.14293	0.000350199	-0.584026	0.148009	-0.201862	0.998188
PFLU_5249	polynucleotide phosphorylase/polyadenylase	2.69028	9.27743e-11	2.49115	1.6609e-10	2.10679	2.19315e-09	2.27017	5.97984e-10	-0.58349	0.0750859	-0.220982	0.998188
PFLU_2078	conserved hypothetical protein	-1.66427	6.85016e-07	-3.5608	7.68374e-11	-2.24704	2.46892e-08	-3.51461	1.3549e-10	-0.582768	0.136015	0.0461904	0.998188
PFLU_5092	putative methyl accepting chemotaxis protein	-3.42467	3.2144e-10	-4.77866	7.40887e-12	-4.00583	7.4167e-11	-4.92586	7.40186e-12	-0.581157	0.156264	-0.147205	0.998188
PFLU_2080	putative lipopolysaccharide biosynthesis glycosyl transferase	-1.61622	3.11637e-08	-3.49835	3.01203e-12	-2.19735	1.11328e-09	-3.40406	7.78784e-12	-0.581134	0.080635	0.0942811	0.998188
PFLU_0612	purH, bifunctional purine biosynthesis protein PurH	2.26776	4.19581e-08	2.21843	4.22567e-08	1.68717	2.0806e-06	1.9917	2.10973e-07	-0.58059	0.126115	-0.22673	0.998188
PFLU_2077	putative transferase	-1.64874	1.11794e-07	-3.42258	1.71283e-11	-2.22659	4.31037e-09	-2.86064	2.14248e-10	-0.577848	0.107323	0.561937	0.616112
PFLU_0095	putative lipoprotein	-0.37552	0.178757	-1.48872	5.29304e-05	-0.953361	0.00373762	-1.45088	0.000173042	-0.577842	0.204812	0.0378339	0.998188
PFLU_6009	putative ABC transport system, ATP-binding protein	0.842715	0.00784915	-0.390143	0.21688	0.265359	0.415943	-0.160192	0.643901	-0.577357	0.186892	0.229951	0.998188
PFLU_2557	putative LuxR-family regulatory protein	0.101198	0.629352	-0.470727	0.0234162	-0.475801	0.0277469	-0.442316	0.0384377	-0.576999	0.109954	0.0284102	0.998188
PFLU_6020	conserved hypothetical protein	2.53021	1.18228e-07	0.778213	0.0108084	1.95386	3.01694e-06	0.722751	0.0194244	-0.576346	0.182305	-0.0554624	0.998188
PFLU_2136	conserved hypothetical protein	1.5526	2.75438e-07	1.12349	1.15877e-05	0.979868	8.18091e-05	0.916439	0.000151694	-0.572734	0.0862377	-0.207056	0.998188
PFLU_5524	rplB, 50S ribosomal protein L2	2.59867	4.66535e-09	2.72498	1.88873e-09	2.0268	1.05389e-07	2.74553	1.90219e-09	-0.57187	0.137337	0.0205484	0.998391
PFLU_1821	sucB, dihydrolipoyllysine-residue succinyltransferase component of 2-oxoglutarate dehydrogenase complex	0.658583	0.00437961	0.538096	0.0144916	0.087436	0.696894	0.249297	0.23777	-0.571147	0.126043	-0.288799	0.992665
PFLU_3484	two-component system, response regulator	1.01232	0.000284974	0.897362	0.000771169	0.441634	0.0785712	0.571133	0.0251571	-0.57069	0.134191	-0.326229	0.990668
PFLU_3234	putative general secretory pathway protein L/Y	1.20826	0.010586	0.934558	0.0417334	0.638536	0.196085	0.878838	0.0746003	-0.569728	0.345367	-0.0557209	0.998188
PFLU_4707	putative fatty acid/phospholipid synthesis protein	2.72605	2.0811e-06	2.93027	6.81933e-07	2.15843	4.37435e-05	2.63973	3.31602e-06	-0.567621	0.271787	-0.290535	0.998188
PFLU_0611	purD, phosphoribosylamine--glycine ligase	2.25838	3.68835e-09	2.04566	9.95346e-09	1.69091	2.06286e-07	1.84658	5.16303e-08	-0.567475	0.0924523	-0.199078	0.998188
PFLU_6035	putative ubiquinone biosynthesis chorismate-pyruvate lyase	1.50324	0.000149727	1.15706	0.00163429	0.936777	0.0118081	1.08797	0.00428364	-0.566465	0.199898	-0.069094	0.998188
PFLU_5424	conserved hypothetical protein	1.29721	1.39856e-05	1.04923	0.000122722	0.730811	0.00429379	1.09673	0.000110697	-0.566398	0.11921	0.0474955	0.998188
PFLU_1700	conserved hypothetical protein	0.772942	0.00307668	0.578919	0.0191059	0.208413	0.430144	0.529198	0.0420162	-0.564528	0.137196	-0.0497213	0.998188
PFLU_3657	hypothetical protein	0.922114	0.00558041	0.156295	0.625732	0.359196	0.276963	0.145165	0.673962	-0.562918	0.216614	-0.0111294	0.998391
PFLU_1176	putative phage-related protein	-0.114856	0.742125	-0.20804	0.531599	-0.6777	0.0684526	-0.688553	0.0685963	-0.562844	0.285962	-0.480513	0.992665
PFLU_1184	putative phage-related tail protein X	0.366215	0.510931	0.372798	0.490183	-0.196302	0.769753	0.189685	0.762509	-0.562517	0.481089	-0.183114	0.998188
PFLU_1654	conserved hypothetical protein	2.02473	3.20762e-06	1.5091	9.73103e-05	1.46221	0.000234514	1.27745	0.000955167	-0.562515	0.168504	-0.23165	0.998188
PFLU_3621	conserved hypothetical protein	0.211334	0.632517	0.912553	0.0201865	-0.350783	0.497827	1.25501	0.00366067	-0.562117	0.360355	0.342454	0.998188
PFLU_5900	rho, transcription termination factor	2.13752	1.44783e-08	2.24222	5.75036e-09	1.57651	7.32543e-07	2.15544	1.10234e-08	-0.561006	0.114051	-0.0867778	0.998188
PFLU_3537	putative flavin-binding monooxygenase-like protein	0.303391	0.241543	0.375944	0.140236	-0.256901	0.346792	0.226674	0.394158	-0.560292	0.176982	-0.14927	0.998188
PFLU_3622	putative membrane protein	0.507946	0.380401	0.563056	0.31696	-0.0515321	0.942004	0.675991	0.261812	-0.559478	0.502308	0.112935	0.998188
PFLU_0289	rfbC, dTDP-4-dehydrorhamnose 3,5-epimerase	-0.379793	0.0782785	-1.22729	1.54785e-05	-0.938179	0.000356137	-1.2518	2.11728e-05	-0.558386	0.137337	-0.0245079	0.998391
PFLU_4170	putative membrane protein	1.8423	0.000124429	2.15969	1.70114e-05	1.28516	0.00478564	1.49416	0.00141802	-0.557148	0.276909	-0.665531	0.769633
PFLU_4835	putative aminotransferase class-V	0.455224	0.0560457	0.00967729	0.967719	-0.101319	0.697632	0.0508768	0.843532	-0.556542	0.148009	0.0411996	0.998188
PFLU_5823	ilvA, threonine dehydratase	2.27725	1.33914e-07	2.31653	8.2797e-08	1.72177	5.64133e-06	2.17235	2.54822e-07	-0.555473	0.15458	-0.144181	0.998188
PFLU_3946	putative copper resistance protein	1.63644	4.56329e-06	1.24737	8.76889e-05	1.08167	0.000569022	1.08712	0.000538216	-0.554765	0.148009	-0.160249	0.998188
PFLU_3672	conserved hypothetical membrane protein	1.09742	0.00321785	0.298836	0.399959	0.542862	0.146525	0.0369614	0.928022	-0.554558	0.246656	-0.261874	0.998188
PFLU_1482	putative colicind-pore forming protein	0.479017	0.0612273	0.178141	0.48252	-0.0740863	0.799541	-0.226707	0.414921	-0.553103	0.167298	-0.404847	0.967166
PFLU_6122	atpF, ATP synthase B chain	1.72334	1.85595e-09	0.985663	1.63957e-06	1.17096	2.83727e-07	0.924387	3.9839e-06	-0.552381	0.0498925	-0.0612763	0.998188
PFLU_0645	putative type II secretion system protein	-2.21146	1.36321e-08	-4.07129	1.08944e-11	-2.76316	1.39118e-09	-3.87853	2.94438e-11	-0.5517	0.144508	0.192764	0.998188
PFLU_0340	secB, protein-export protein	2.20306	1.51868e-07	1.82991	1.24189e-06	1.65184	6.44765e-06	1.60121	8.19377e-06	-0.551219	0.1574	-0.228709	0.998188
PFLU_3774	putative biopolymer transport protein	1.19476	0.000146228	1.49649	1.07379e-05	0.643637	0.0217143	1.39932	3.1427e-05	-0.55112	0.165973	-0.0971714	0.998188
PFLU_6006	conserved hypothetical protein	2.79042	6.98517e-11	0.63357	0.0014574	2.23939	1.27019e-09	0.736655	0.0004718	-0.551032	0.0823812	0.103085	0.998188
PFLU_0824	putative outer membrane porin	0.650543	0.0334401	-0.395428	0.182361	0.0998151	0.757459	-0.470424	0.121381	-0.550728	0.239643	-0.0749966	0.998188
PFLU_1653	putative transport-related, membrane protein	2.00084	9.02852e-06	1.5468	0.000176386	1.45037	0.000633785	2.05346	1.0459e-05	-0.55047	0.183509	0.506661	0.837147
PFLU_0471	putative ABC transport system, permease protein	0.284621	0.529781	0.322583	0.460778	-0.265796	0.607025	0.205025	0.677827	-0.550417	0.408997	-0.117558	0.998188
PFLU_5525	rplW, 50S ribosomal protein L23	2.90373	3.81712e-10	3.17782	8.98675e-11	2.35399	6.52009e-09	3.15169	1.12174e-10	-0.54974	0.109954	-0.0261266	0.998188
PFLU_1634	putative peptide ABC transport system, ATP-binding protein	0.213308	0.467961	-0.457155	0.127282	-0.334906	0.298395	-0.129396	0.691617	-0.548214	0.220283	0.327759	0.998188
PFLU_6014	putative membrane protein	2.65907	2.32622e-07	0.808446	0.0285074	2.11181	7.15137e-06	1.33601	0.00125984	-0.547261	0.182626	0.527565	0.922796
PFLU_5520	rplP, 50S ribosomal protein L16	2.47811	4.97078e-11	2.45129	3.85625e-11	1.9321	1.32777e-09	2.46605	4.01535e-11	-0.546015	0.0671538	0.0147589	0.998391
PFLU_1279	putative outer membrane protein	1.3133	3.49455e-08	0.700966	5.08837e-05	0.768868	2.63353e-05	0.58343	0.000379585	-0.544433	0.0429736	-0.117536	0.998188
PFLU_5521	rpsC, 30S ribosomal protein S3	2.55236	1.56033e-10	2.5473	1.11086e-10	2.00852	3.31983e-09	2.60859	8.94995e-11	-0.543836	0.0834528	0.0612894	0.998188
PFLU_4161	putative L-asparaginase II precursor	0.0852044	0.735325	0.299439	0.203827	-0.458363	0.0666805	-0.298356	0.219756	-0.543567	0.168258	-0.597795	0.616112
PFLU_0360	conserved hypothetical protein	0.786295	0.00562178	0.527462	0.0488635	0.243154	0.396335	0.479186	0.0888996	-0.543141	0.176562	-0.0482758	0.998188
PFLU_4794	putative phosphate transporter	-1.40956	0.00421269	-1.51674	0.00230574	-1.95213	0.000521763	-1.68693	0.00151788	-0.542572	0.472941	-0.170187	0.998188
PFLU_4930	conserved hypothetical protein	-0.190382	0.322638	-0.53566	0.00825369	-0.729468	0.00131857	-0.576586	0.00713503	-0.539085	0.116692	-0.0409266	0.998188
PFLU_0110	putative hydrolase	0.0377955	0.89989	-0.352083	0.199556	-0.501112	0.0845835	-0.478193	0.0970058	-0.538907	0.218837	-0.126111	0.998188
PFLU_1820	sucA, 2-oxoglutarate dehydrogenase E1 component	0.834096	0.000432615	0.806031	0.000523242	0.296693	0.146807	0.516549	0.0140606	-0.537404	0.126794	-0.289482	0.990668
PFLU_4004	putative membrane protein	-1.69207	1.33466e-05	-1.59947	1.96304e-05	-2.22765	1.95531e-06	-1.66478	3.40565e-05	-0.535582	0.311393	-0.065317	0.998188
PFLU_6123	atpE, ATP synthase C chain	1.53801	2.93001e-08	0.941425	8.97966e-06	1.0026	5.97302e-06	0.792913	6.6785e-05	-0.535405	0.0752702	-0.148512	0.998188
PFLU_1278	putative surface exported protein	2.2028	3.67178e-10	1.73444	5.23892e-09	1.66917	1.33598e-08	1.66479	1.02005e-08	-0.533634	0.0761736	-0.0696418	0.998188
PFLU_2728	putative membrane protein	0.354664	0.253689	0.819088	0.0095911	-0.178515	0.608711	0.892721	0.00756189	-0.533179	0.255177	0.0736323	0.998188
PFLU_0454	conserved hypothetical protein	-0.55738	0.0663393	0.34609	0.214376	-1.09048	0.00313102	0.258787	0.391532	-0.533097	0.289074	-0.0873037	0.998188
PFLU_0601	hypothetical protein	0.551502	0.139478	0.324701	0.38437	0.0187903	0.964558	0.392051	0.326716	-0.532712	0.328378	0.0673495	0.998188
PFLU_3539	putative membrane protein	0.717625	0.00160925	0.700478	0.00176239	0.185058	0.400542	0.513306	0.0207057	-0.532568	0.116692	-0.187173	0.998188
PFLU_1060	rnc, ribonuclease III	0.17333	0.322507	-0.380618	0.0330548	-0.35923	0.0520938	-0.505563	0.0091459	-0.532559	0.0934348	-0.124946	0.998188
PFLU_2082	putative glycosyltransferase	-0.379467	0.0755835	-1.45563	1.88759e-06	-0.911553	0.000353586	-1.7121	4.04008e-07	-0.532086	0.145774	-0.256472	0.998188
PFLU_1066	conserved hypothetical protein	1.57525	6.91029e-05	1.72579	2.09576e-05	1.04366	0.00404294	1.59718	7.35511e-05	-0.531593	0.228063	-0.128603	0.998188
PFLU_0468	conserved hypothetical protein	0.480732	0.0419866	-0.03089	0.895941	-0.0503408	0.848898	-0.113051	0.654021	-0.531072	0.156264	-0.0821609	0.998188
PFLU_0874	fumC1, fumarate hydratase class II	-4.57625	4.92063e-11	-3.75707	2.11706e-10	-5.10698	3.94248e-11	-4.59622	7.72673e-11	-0.530729	0.336459	-0.839146	0.616112
PFLU_1983	conserved hypothetical protein	0.450703	0.339781	0.141328	0.772683	-0.0793809	0.889102	-0.286701	0.61512	-0.530084	0.435153	-0.428029	0.998188
PFLU_3413	hypothetical protein	0.196248	0.687969	-1.1118	0.0324176	-0.331827	0.527449	-2.29087	0.00191796	-0.528075	0.459242	-1.17907	0.923089
PFLU_0648	putative membrane protein	-1.83922	1.37398e-08	-3.86231	1.85762e-12	-2.36719	8.03873e-10	-3.88503	2.35121e-12	-0.527969	0.107323	-0.0227228	0.998188
PFLU_0312	putative amino acid ABC transport system, permease	1.15316	0.00648088	1.36783	0.00153582	0.625209	0.148539	0.822456	0.0562189	-0.527955	0.331172	-0.54537	0.967166
PFLU_5555	conserved hypothetical protein	1.67206	9.30982e-06	1.68914	6.83085e-06	1.14525	0.000672066	1.89658	2.30845e-06	-0.526811	0.183509	0.207442	0.998188
PFLU_4788	conserved hypothetical protein	-0.510441	0.0497638	-0.826214	0.00316463	-1.03632	0.0010135	-0.779382	0.00764769	-0.525879	0.214439	0.0468316	0.998188
PFLU_1818	sdhA, succinate dehydrogenase flavoprotein subunit	1.99686	2.34339e-08	2.0049	1.64248e-08	1.47104	1.06267e-06	1.72323	1.18417e-07	-0.525816	0.126115	-0.281671	0.990668
PFLU_2453	conserved hypothetical protein	1.52651	0.000149026	0.87999	0.0125919	1.00176	0.00738209	0.861017	0.0192617	-0.524748	0.254615	-0.018973	0.998391
PFLU_0172	hypothetical protein	-0.792163	0.00588095	-0.710312	0.0105662	-1.31689	0.000170735	-0.46192	0.0943244	-0.52473	0.241619	0.248392	0.998188
PFLU_0460	aceE1, pyruvate dehydrogenase E1 component	0.654679	0.00205604	0.447213	0.0220149	0.1307	0.507074	0.301092	0.11308	-0.523979	0.11921	-0.146121	0.998188
PFLU_0306	wssG, cell morphology-related protein	0.994369	0.00408919	0.091381	0.788551	0.470672	0.171747	-0.260551	0.484464	-0.523697	0.251454	-0.351932	0.998188
PFLU_1517	conserved hypothetical protein	0.0031254	0.990394	-0.545032	0.011227	-0.520103	0.0197007	-0.456312	0.0374391	-0.523229	0.137097	0.0887206	0.998188
PFLU_4816	conserved hypothetical protein	-0.191475	0.326446	-0.695612	0.00144208	-0.713497	0.00181473	-0.709291	0.00193942	-0.522022	0.126115	-0.0136785	0.998391
PFLU_0680	conserved hypothetical protein	1.91444	8.9063e-09	2.15015	1.39651e-09	1.39249	6.4019e-07	2.02386	3.82498e-09	-0.521954	0.0934348	-0.126294	0.998188
PFLU_1274	uppS, undecaprenyl pyrophosphate synthetase	0.64266	0.00177019	0.579334	0.00351588	0.121492	0.535766	0.293615	0.119834	-0.521168	0.109589	-0.285719	0.967166
PFLU_1178	putative phage tail-related protein	0.00372906	0.990108	-0.0446706	0.84581	-0.5162	0.0335137	-0.74454	0.00414325	-0.519929	0.167129	-0.699869	0.441773
PFLU_2075	conserved hypothetical protein	-1.86073	6.7255e-08	-3.54369	3.08201e-11	-2.38037	5.08931e-09	-3.58838	5.63397e-11	-0.519636	0.148124	-0.0446874	0.998188
PFLU_4470	putative membrane protein	0.0267048	0.946787	-0.0687938	0.845969	-0.492338	0.198795	-0.199402	0.604104	-0.519043	0.336536	-0.130608	0.998188
PFLU_5633	putative ABC transport system, substrate-binding exported protein	-0.443827	0.221679	0.19883	0.56353	-0.962624	0.0241305	0.0339126	0.930649	-0.518797	0.384842	-0.164918	0.998188
PFLU_3619	putative oxygen-independent coproporphyrinogen III oxidase	-2.41015	0.000147197	-1.7157	0.00200533	-2.92893	4.20535e-05	-1.48577	0.00670785	-0.51878	0.568506	0.22993	0.998188
PFLU_6117	atpC, ATP synthase epsilon chain	1.31028	2.23319e-07	0.615754	0.000738964	0.791658	9.19855e-05	0.649984	0.000545459	-0.518619	0.0799524	0.0342305	0.998188
PFLU_1258	rrmA, ribosomal RNA large subunit methyltransferase A	0.72655	0.00111605	0.700059	0.0013666	0.208782	0.320841	0.329314	0.114009	-0.517768	0.116692	-0.370745	0.837147
PFLU_5522	rplV, 50S ribosomal protein L22	2.63835	4.19794e-10	2.80892	1.40312e-10	2.12078	7.12461e-09	2.84531	1.34129e-10	-0.517575	0.11418	0.0363935	0.998188
PFLU_1404	putative membrane protein	0.119014	0.728187	-0.0190625	0.953503	-0.398557	0.256527	-0.0628587	0.860522	-0.517571	0.303836	-0.0437962	0.998188
PFLU_0424	putative lipoprotein	0.724153	0.0677021	-0.170247	0.686367	0.207139	0.641177	0.0635787	0.890077	-0.517014	0.350031	0.233826	0.998188
PFLU_0296	oprQ, outer membrane protein, oprE3 precursor	0.865346	0.000435792	0.421509	0.0461182	0.348839	0.104187	0.320234	0.128729	-0.516507	0.146641	-0.101275	0.998188
PFLU_1822	lpd, dihydrolipoyl dehydrogenase	1.00483	1.51485e-05	0.925089	3.12134e-05	0.489611	0.00889131	0.666557	0.000803164	-0.515219	0.106583	-0.258532	0.990668
PFLU_4714	rne, putative ribonuclease E	2.44593	3.89982e-09	3.05264	1.94321e-10	1.93074	7.95134e-08	2.90702	3.92704e-10	-0.515189	0.145774	-0.145619	0.998188
PFLU_1823	sucC, succinyl-CoA synthetase beta chain	1.71111	1.39395e-08	1.42924	1.01645e-07	1.19732	1.26507e-06	1.40126	1.40492e-07	-0.513783	0.0934348	-0.027979	0.998188
PFLU_6134	putative inner membrane protein	2.56068	3.18009e-10	2.47354	3.41451e-10	2.049	6.09443e-09	2.3579	7.44764e-10	-0.511678	0.10694	-0.115638	0.998188
PFLU_2081	putative nucelotidyl transferase	-1.68631	2.18289e-07	-3.14015	1.11246e-10	-2.19795	1.21482e-08	-3.35427	9.04222e-11	-0.511649	0.148009	-0.214119	0.998188
PFLU_0428	putative membrane protein	0.489098	0.155865	-0.113827	0.752643	-0.0223227	0.956179	-0.0427509	0.914025	-0.511421	0.313149	0.0710762	0.998188
PFLU_5527	rplC, 50S ribosomal protein L3	2.9225	1.49898e-09	3.04924	6.41312e-10	2.41118	1.66423e-08	3.00014	8.6561e-10	-0.511326	0.167298	-0.0490981	0.998188
PFLU_3541	conserved hypothetical protein	-0.94956	0.00032627	-1.32465	1.07584e-05	-1.45924	9.02768e-06	-1.32452	2.64527e-05	-0.509683	0.183509	0.000133108	0.999731
PFLU_6124	atpB, ATP synthase A chain	1.48426	2.36655e-07	0.932764	4.33594e-05	0.974585	3.71872e-05	0.79528	0.000252918	-0.509679	0.109954	-0.137484	0.998188
PFLU_5148	conserved hypothetical protein	1.22955	0.00159332	0.398796	0.251172	0.720087	0.0481321	0.769319	0.0344185	-0.509461	0.324481	0.370524	0.998188
PFLU_1824	sucD, succinyl-CoA synthetase alpha chain	1.55676	6.60239e-08	1.2064	1.16836e-06	1.04741	8.13101e-06	1.13392	2.64388e-06	-0.509352	0.100451	-0.0724801	0.998188
PFLU_5395	rluE, ribosomal large subunit pseudouridine synthase E	2.12025	9.34674e-06	2.1763	5.50274e-06	1.61217	0.000345323	2.0198	2.43698e-05	-0.508081	0.252288	-0.156491	0.998188
PFLU_4327	putative sulfatase	1.15854	4.77457e-06	0.655582	0.00127369	0.652758	0.00165935	0.461046	0.0165971	-0.505784	0.112096	-0.194536	0.998188
PFLU_0476	conserved hypothetical protein	1.71656	2.2252e-07	1.90213	4.44514e-08	1.21207	2.44834e-05	1.70965	2.86804e-07	-0.504489	0.119569	-0.19248	0.998188
PFLU_3784	putative membrane protein	1.27539	0.00118581	1.28881	0.000967152	0.77226	0.0460195	1.24166	0.00224122	-0.503135	0.281261	-0.04715	0.998188
PFLU_0288	putative dTDP-4-dehydrorhamnose reductase	-0.508094	0.00159741	-1.50768	9.52976e-09	-1.01096	2.28747e-06	-1.46443	2.55558e-08	-0.502867	0.0750859	0.0432504	0.998188
PFLU_5410	leuS, leucyl-tRNA synthetase	2.24776	1.791e-09	2.21061	1.54827e-09	1.7454	4.98263e-08	2.05561	4.60857e-09	-0.50236	0.113738	-0.155005	0.998188
PFLU_1765	ccmH, cytochrome C biogenesis protein precursor	-0.181793	0.462322	-0.699469	0.00764522	-0.682303	0.0129378	-0.64857	0.0179578	-0.50051	0.198667	0.0508999	0.998188
PFLU_0776	putative type IV pilus related protein	-1.25465	1.63792e-06	-0.93308	3.39557e-05	-1.75439	7.65274e-08	-1.08599	1.39438e-05	-0.499738	0.14148	-0.152915	0.998188
PFLU_0848	plc, phosphatidylcholine-hydrolyzing phospholipase C	0.95797	0.000375758	0.447279	0.0536612	0.459422	0.0572424	0.0951975	0.699652	-0.498547	0.167129	-0.352082	0.989476
PFLU_4057	conserved hypothetical protein	-0.252949	0.566733	-0.332342	0.435597	-0.751026	0.117811	-0.168249	0.718214	-0.498077	0.470331	0.164092	0.998188
PFLU_3904	putative exported protein	-2.56431	7.49762e-10	-4.28626	1.97826e-12	-3.06195	1.25245e-10	-4.29059	2.82315e-12	-0.49764	0.146314	-0.00432213	0.998391
PFLU_3908	conserved hypothetical protein	1.12491	0.000114995	0.738942	0.00422082	0.627376	0.0166972	1.05644	0.000285146	-0.497532	0.167129	0.317499	0.990668
PFLU_0465	rfaP, lipopolysaccharide core biosynthesis protein	2.09977	6.87877e-07	1.72644	7.23303e-06	1.60239	3.26862e-05	1.44147	0.000112901	-0.497383	0.17793	-0.284965	0.998188
PFLU_3664	mannose-1-phosphate guanylyltransferase	0.629823	0.0202538	-0.166483	0.538241	0.133322	0.644032	-0.37441	0.198679	-0.496501	0.207338	-0.207927	0.998188
PFLU_5423	putative penicillin-binding protein	1.10028	5.25734e-05	0.98628	0.000141583	0.604234	0.0104751	0.642782	0.00676874	-0.496047	0.148332	-0.343498	0.933597
PFLU_4998	putative acid tolerance protein	0.507042	0.00142556	0.0443323	0.758242	0.0110729	0.94429	0.0195321	0.895984	-0.49597	0.0715833	-0.0248002	0.998188
PFLU_5093	putative chemotaxis two-component system, sensor histidine kinase protein	-3.42114	6.85403e-11	-4.49396	2.9196e-12	-3.91672	2.17222e-11	-4.25699	7.00485e-12	-0.495577	0.170571	0.23697	0.998188
PFLU_0405	putative NADP-dependent malic enzyme	2.40435	4.54184e-10	2.47755	2.20028e-10	1.90897	8.9803e-09	2.37369	4.34087e-10	-0.495374	0.109954	-0.103863	0.998188
PFLU_1359	pitA, low-affinity inorganic phosphate transport membrane protein	0.565256	0.158413	0.601436	0.127888	0.0723604	0.870547	0.664548	0.0998192	-0.492896	0.421425	0.0631111	0.998188
PFLU_6016	putative lipoprotein	1.89751	8.97852e-06	0.130619	0.72164	1.40513	0.000422326	0.734429	0.0493301	-0.492384	0.220639	0.603809	0.86393
PFLU_5411	putative lipoprotein	1.99743	6.00415e-09	1.65186	5.87981e-08	1.50745	3.49426e-07	1.5838	1.52726e-07	-0.489977	0.0999568	-0.0680602	0.998188
PFLU_0606	cobI, precorrin-2 C(20)-methyltransferase	0.121135	0.625479	-0.0360313	0.880847	-0.368338	0.147725	-0.379656	0.13744	-0.489474	0.189985	-0.343625	0.990668
PFLU_5447	conserved hypothetical protein	-0.280422	0.178937	-0.506802	0.0187104	-0.769607	0.00189948	-0.429235	0.0533387	-0.489185	0.16295	0.077567	0.998188
PFLU_1646	hisC, histidinol-phosphate aminotransferase	1.34581	3.01403e-07	0.988898	1.02662e-05	0.857505	7.39672e-05	0.784979	0.000164568	-0.488309	0.0977931	-0.203919	0.998188
PFLU_5033	conserved hypothetical protein	2.76592	2.14191e-09	2.99683	4.57265e-10	2.27825	6.19894e-08	2.87782	1.41256e-09	-0.48767	0.116977	-0.119014	0.998188
PFLU_1228	lysS, lysyl-tRNA synthetase	0.912972	0.000303175	0.84828	0.000527377	0.425634	0.0537362	0.579559	0.0104939	-0.487338	0.159726	-0.268721	0.998188
PFLU_0307	wssH, cell morphology-related protein	1.78699	0.000125011	0.671219	0.100666	1.30016	0.00372284	0.770916	0.0800063	-0.486827	0.31727	0.0996971	0.998188
PFLU_5134	conserved hypothetical protein	2.22339	2.77825e-06	1.89531	1.69779e-05	1.7371	8.16108e-05	1.7483	7.5046e-05	-0.48629	0.249949	-0.147009	0.998188
PFLU_3391	putative oxidoreductase	-1.10233	3.2801e-05	-1.9748	3.33812e-08	-1.58824	7.65913e-07	-1.93316	6.82922e-08	-0.485908	0.165973	0.0416356	0.998188
PFLU_4494	putative lipoprotein	0.47889	0.00685974	-0.651898	0.000670429	-0.00692849	0.969013	-0.810385	0.000130529	-0.485819	0.103962	-0.158488	0.998188
PFLU_0330	hisA, 1-(5-phosphoribosyl)-5-[(5-phosphoribosylamino) me thylideneamino] imidazole-4-carboxamide isomerase	1.21468	6.65091e-07	1.32714	1.71023e-07	0.728906	0.000271045	1.09688	2.62065e-06	-0.485776	0.0914252	-0.230259	0.990668
PFLU_2395	conserved hypothetical protein	-0.91339	0.000478767	-1.18965	3.38627e-05	-1.39878	1.29396e-05	-1.0086	0.000297232	-0.485387	0.197125	0.181045	0.998188
PFLU_4885	putative exported protein	2.08564	8.33379e-07	1.49401	2.89005e-05	1.60061	1.86188e-05	1.0809	0.000751998	-0.485035	0.254615	-0.413112	0.990668
PFLU_1595	conserved hypothetical protein	-0.234614	0.251789	-0.540252	0.0114841	-0.719239	0.00224118	-0.673638	0.00356269	-0.484624	0.158367	-0.133386	0.998188
PFLU_3676	udg, putative nucleotide sugar dehydrogenase	1.92376	3.33189e-06	1.13327	0.000900151	1.4392	0.000135305	0.913091	0.00746173	-0.484561	0.22234	-0.220182	0.998188
PFLU_5538	rplK, 50S ribosomal protein L11	3.07281	1.48424e-12	3.17329	5.80199e-13	2.58845	8.17251e-12	3.00111	1.05398e-12	-0.484366	0.0671538	-0.172173	0.998188
PFLU_2368	putative transport-related membrane protein	2.09489	1.35838e-06	2.56003	8.74461e-08	1.61064	3.61123e-05	2.50816	1.37437e-07	-0.484246	0.24864	-0.0518714	0.998188
PFLU_4806	putative acetyltransferase	2.00911	1.80648e-06	1.66153	1.75889e-05	1.5252	9.45779e-05	1.57525	6.6785e-05	-0.483913	0.18551	-0.0862802	0.998188
PFLU_4038	putative tartrate dehydrogenase	-0.976295	5.34814e-05	-2.094	6.81059e-09	-1.46013	9.65902e-07	-2.03089	2.07965e-08	-0.483837	0.148009	0.0631109	0.998188
PFLU_1173	putative phage baseplate assembly protein	-0.132166	0.647668	-0.208742	0.45058	-0.614229	0.0416973	-0.793305	0.012552	-0.482063	0.275738	-0.584564	0.812114
PFLU_3607	conserved hypothetical protein	0.168099	0.609809	0.629001	0.0422489	-0.313269	0.374509	0.226747	0.501966	-0.481368	0.321251	-0.402254	0.992665
PFLU_0926	puattive exported protein	-1.36182	1.37157e-06	-2.35277	1.63352e-09	-1.84178	6.36719e-08	-2.25706	5.92062e-09	-0.47996	0.156264	0.095715	0.998188
PFLU_3039	dolichyl-phosphate-mannose-protein mannosyltransferase-family protein	-0.31688	0.0810735	-1.00557	2.04043e-05	-0.796069	0.000346312	-0.969222	5.29914e-05	-0.479189	0.131933	0.0363441	0.998188
PFLU_5914	putative membrane protein	1.41606	0.000577729	1.30127	0.00111394	0.937282	0.0172265	1.35765	0.00108925	-0.478775	0.329469	0.0563731	0.998188
PFLU_5644	conserved hypothetical protein	3.22827	5.72474e-10	2.57854	8.41507e-09	2.74974	5.97188e-09	2.39752	3.17148e-08	-0.478526	0.1595	-0.181022	0.998188
PFLU_5055	putative membrane protein	1.03557	2.59015e-06	0.514436	0.00240816	0.557085	0.0016252	0.227338	0.148751	-0.478488	0.0914252	-0.287098	0.86393
PFLU_0534	rpsR, 30S ribosomal protein S18	4.17426	1.85562e-12	4.3209	7.50523e-13	3.69589	7.10666e-12	4.23661	1.05398e-12	-0.478366	0.112096	-0.0842966	0.998188
PFLU_4615	conserved hypothetical protein	-2.73153	4.15528e-08	-2.46537	1.00142e-07	-3.20913	9.24047e-09	-2.63275	6.40687e-08	-0.477596	0.308992	-0.167385	0.998188
PFLU_0009	gmhB, D,D-heptose 1,7-bisphosphate phosphatase	1.06604	3.49127e-05	0.925477	0.00013575	0.588501	0.00847721	0.893875	0.000271738	-0.477544	0.138737	-0.0316013	0.998188
PFLU_5999	exbB, biopolymer transport membrane protein	-0.0502692	0.841507	0.744365	0.00276167	-0.526103	0.0354011	0.238576	0.311563	-0.475834	0.197823	-0.505789	0.728453
PFLU_0259	ompR, DNA-binding response regulator	0.0903042	0.629352	-0.163054	0.358434	-0.385158	0.0383316	-0.486187	0.0105094	-0.475462	0.12888	-0.323134	0.89392
PFLU_4353	putative aminotransferase	0.652774	0.032229	0.25108	0.398462	0.177438	0.579766	0.127078	0.691604	-0.475337	0.290111	-0.124002	0.998188
PFLU_1280	lpxD, UDP-3-O-[3-hydroxymyristoyl] glucosamine N-acyltransferase	0.991285	5.48466e-06	0.391349	0.0168123	0.516486	0.00339744	0.176482	0.273029	-0.474799	0.0934348	-0.214867	0.992665
PFLU_0483	putative lipopolysaccharide biosynthesis-related epimerase/dehydratase	0.814149	0.000114507	0.978908	1.3388e-05	0.339685	0.0599407	0.945461	2.54e-05	-0.474463	0.111183	-0.0334468	0.998188
PFLU_0098	putative ABC transport system, permease	-0.512144	0.0165827	-1.03601	5.80081e-05	-0.985944	0.000160419	-1.20883	2.18598e-05	-0.473801	0.169232	-0.172821	0.998188
PFLU_5536	rplJ, 50S ribosomal protein L10	3.39485	5.15254e-12	3.67136	1.29248e-12	2.9213	2.78203e-11	3.53402	2.25507e-12	-0.47356	0.109589	-0.137333	0.998188
PFLU_3781	putative thioredoxin-related protein	0.692445	0.154145	0.638583	0.183561	0.219683	0.694591	1.16611	0.0221783	-0.472762	0.489055	0.527529	0.998188
PFLU_5075	preprotein translocase, auxillary membrane component (General Secretory Pathway)	2.87549	4.35615e-10	2.41873	2.97401e-09	2.40296	5.53547e-09	2.21879	1.21226e-08	-0.472529	0.144508	-0.199934	0.998188
PFLU_1354	putative aminotransferase	-0.788339	0.000377608	-0.753802	0.000496526	-1.25958	5.36955e-06	-0.754007	0.000758087	-0.471239	0.15458	-0.000205855	0.999514
PFLU_4701	putative exported protein	2.11693	1.8373e-09	2.39284	2.4533e-10	1.6459	7.53307e-08	2.35646	4.21127e-10	-0.471036	0.0991114	-0.0363823	0.998188
PFLU_5221	conserved hypothetical protein	0.96669	0.000138521	0.754047	0.00126277	0.496252	0.0295852	0.525492	0.0221309	-0.470438	0.148009	-0.228555	0.998188
PFLU_5509	rpmD, 50S ribosomal protein L30	3.18908	2.14191e-09	3.39049	7.03008e-10	2.71903	1.93392e-08	3.46071	6.49013e-10	-0.470047	0.204174	0.0702169	0.998188
PFLU_5766	putative homoserine O-acetyltransferase	1.81117	3.51898e-07	1.92061	1.32517e-07	1.34121	1.73338e-05	1.96066	1.30882e-07	-0.469957	0.168504	0.0400484	0.998188
PFLU_5323	putative exported protein	-0.393847	0.0369702	-1.68756	6.47053e-08	-0.863768	0.000179162	-1.43168	8.04081e-07	-0.469921	0.142665	0.255875	0.998188
PFLU_3390	hypothetical protein	-1.14115	3.65369e-05	-2.38686	7.15298e-09	-1.61095	1.42326e-06	-2.22879	3.76408e-08	-0.4698	0.193254	0.158071	0.998188
PFLU_0513	putative membrane protein	0.55789	0.0103918	0.520501	0.0145833	0.0881196	0.70272	0.564174	0.0123892	-0.469771	0.15314	0.0436722	0.998188
PFLU_4953	putative two-component system, sensor histidine kinase protein	0.512006	0.0430277	0.516806	0.03849	0.042749	0.881146	0.695837	0.0100074	-0.469257	0.207654	0.179031	0.998188
PFLU_3809	isocitrate dehydrogenase [NADP]	1.23253	4.0136e-05	1.25966	2.68511e-05	0.76332	0.00314135	1.14608	7.75289e-05	-0.469209	0.204174	-0.113587	0.998188
PFLU_1111	putative two-component system, sensor kinase	-0.975403	9.19148e-05	-1.4855	8.00085e-07	-1.44459	1.96341e-06	-1.67445	3.57134e-07	-0.469188	0.169703	-0.188947	0.998188
PFLU_5419	putative cell division-related protein	1.48409	2.03972e-07	1.07968	7.54854e-06	1.01533	2.10322e-05	0.897096	6.82214e-05	-0.468756	0.124729	-0.182584	0.998188
PFLU_6000	exbD, biopolymer transport protein	-0.0541836	0.881061	0.822892	0.0129536	-0.52288	0.148939	0.439387	0.192277	-0.468696	0.365748	-0.383504	0.998188
PFLU_2749	multidrug efflux system inner membrane protein	1.19819	1.79272e-05	1.13674	2.6995e-05	0.730572	0.00264762	0.886992	0.000484262	-0.467617	0.156947	-0.249745	0.998188
PFLU_5720	sahA, adenosylhomocysteinase	1.00644	7.10592e-06	0.937628	1.31281e-05	0.539305	0.00301424	0.744393	0.000165769	-0.467133	0.109954	-0.193235	0.998188
PFLU_0023	hemF, coproporphyrinogen III oxidase, aerobic	0.628279	0.0204918	0.858165	0.00244449	0.161423	0.564523	0.548105	0.0437106	-0.466856	0.241619	-0.31006	0.998188
PFLU_2122	putative two-component system, histidine kinase	-0.149781	0.608959	-0.102085	0.719878	-0.616596	0.0489142	-0.18566	0.541542	-0.466815	0.293083	-0.083575	0.998188
PFLU_5518	rpsQ, 30S ribosomal protein S17	2.71382	7.65754e-10	2.66862	6.7408e-10	2.24796	9.43624e-09	2.5844	1.17503e-09	-0.46586	0.15433	-0.0842141	0.998188
PFLU_6013	putative membrane protein	1.62731	1.87486e-07	0.0476991	0.816932	1.16183	1.42938e-05	0.0747981	0.727761	-0.465487	0.138737	0.027099	0.998188
PFLU_3655	hypothetical protein	1.06589	0.00592407	0.517877	0.150252	0.600833	0.108358	0.244706	0.519828	-0.465054	0.381144	-0.27317	0.998188
PFLU_0163	putative lipoprotein	1.37052	0.00011443	0.602956	0.0462699	0.906348	0.00605605	0.653342	0.0429069	-0.464174	0.24582	0.0503866	0.998188
PFLU_4047	putative ABC transport protein, solute binding component	-0.381081	0.128065	-1.48381	9.97147e-06	-0.844668	0.00247417	-1.17638	0.000127573	-0.463587	0.24247	0.307429	0.998188
PFLU_1052	valS, valyl-tRNA synthetase	1.87207	2.13105e-09	2.12431	3.03615e-10	1.4087	9.01102e-08	1.9512	1.03472e-09	-0.463366	0.0991114	-0.173101	0.998188
PFLU_1351	putative transport-related membrane protein	-2.38981	1.30401e-05	-2.99609	1.06264e-06	-2.85284	2.88522e-06	-2.90057	2.12206e-06	-0.463028	0.480464	0.0955214	0.998188
PFLU_5890	putative ABC transport system, membrane protein	-0.802475	0.00257975	-0.573945	0.0191997	-1.26513	9.99449e-05	-0.579976	0.0255066	-0.462652	0.253641	-0.00603079	0.998391
PFLU_4842	putative porin	0.248699	0.305821	-0.797989	0.00250862	-0.213343	0.385417	-1.03884	0.000288028	-0.462043	0.229602	-0.240849	0.998188
PFLU_1817	putative succinate dehydrogenase hydrophobic membrane anchor protein	2.19885	1.43588e-08	2.1891	1.11156e-08	1.7372	3.7354e-07	2.03116	3.83582e-08	-0.461652	0.156264	-0.157942	0.998188
PFLU_0332	putative exported protein	0.31619	0.0925851	-0.118897	0.527446	-0.145392	0.463706	0.0067409	0.974311	-0.461582	0.142665	0.125638	0.998188
PFLU_1643	gyrA, DNA gyrase subunit A	2.35644	3.21451e-10	2.44388	1.47259e-10	1.89572	5.58908e-09	2.27763	3.98021e-10	-0.460719	0.11418	-0.16625	0.998188
PFLU_2293	pnl, pectin lyase	0.874417	0.00087843	0.882843	0.000725906	0.413877	0.0866289	0.287143	0.231517	-0.46054	0.18791	-0.5957	0.606293
PFLU_0953	lpxC, UDP-3-O-[3-hydroxymyristoyl] N-acetylglucosamine deacetylase	-0.985308	0.000133328	-1.39996	2.62118e-06	-1.44479	2.49006e-06	-1.36282	3.8985e-06	-0.459481	0.180567	0.03714	0.998188
PFLU_0559	putative epimerase	1.45973	2.49433e-05	1.49726	1.55541e-05	1.00039	0.00134983	1.21457	0.000218761	-0.459338	0.227441	-0.282693	0.998188
PFLU_0426	conserved hypothetical protein	0.821421	0.00110732	0.344157	0.125253	0.362202	0.127282	0.490958	0.0403439	-0.459219	0.174575	0.146801	0.998188
PFLU_5534	rpoB, DNA-directed RNA polymerase beta chain	2.06741	1.95357e-10	2.11221	1.0501e-10	1.60823	4.92242e-09	1.9598	2.92666e-10	-0.459175	0.083526	-0.152412	0.998188
PFLU_4490	cobyrinic acid A,C-diamide synthase	1.07378	0.00286079	1.23062	0.000809589	0.614696	0.0818462	1.05467	0.00428884	-0.45908	0.317784	-0.175952	0.998188
PFLU_5528	rpsJ, 30S ribosomal protein S10	2.95681	5.67207e-09	3.08904	2.3821e-09	2.49778	5.09575e-08	3.08785	2.71598e-09	-0.459033	0.23937	-0.0011876	0.998705
PFLU_2547	putative pyoverdine synthetase F	-2.2809	1.9535e-06	-1.98572	6.57213e-06	-2.73973	6.8758e-07	-2.27624	4.08619e-06	-0.458831	0.446836	-0.290524	0.998188
PFLU_5504	rpsK, 30S ribosomal protein S11	2.58735	2.71182e-11	2.54435	2.13065e-11	2.12925	3.25278e-10	2.49517	3.10474e-11	-0.458094	0.0946629	-0.0491789	0.998188
PFLU_3678	putative protein-tyrosine phosphatase	2.44202	2.4354e-06	2.01222	2.02568e-05	1.98453	3.61476e-05	1.83644	8.01951e-05	-0.457494	0.336521	-0.175784	0.998188
PFLU_3241	hypothetical protein	-0.354406	0.313197	-0.473323	0.174198	-0.811146	0.0406171	-0.77264	0.0522202	-0.45674	0.418027	-0.299317	0.998188
PFLU_0328	hisH, imidazole glycerol phosphate synthase subunit	2.44023	1.84508e-08	2.65443	4.29075e-09	1.98407	3.62495e-07	2.58402	8.11117e-09	-0.45616	0.181096	-0.0704158	0.998188
PFLU_4966	putative ECF sigma factor	-1.00212	0.000868164	-0.947453	0.00121641	-1.45821	5.97405e-05	-1.56389	3.5869e-05	-0.456084	0.310219	-0.61644	0.7624
PFLU_1877	rdgC, recombination associated protein	2.73051	1.29585e-07	2.7311	9.99542e-08	2.27445	1.94183e-06	2.61915	2.49096e-07	-0.456059	0.257365	-0.111953	0.998188
PFLU_6085	putative cobalamine biosynthesis-related protein	2.3614	6.71781e-08	2.00527	4.78551e-07	1.90538	1.64206e-06	1.58056	1.6941e-05	-0.456018	0.184089	-0.424708	0.86393
PFLU_5342	putative LuxR-family regulatory protein	-0.0153937	0.941542	-1.12135	7.15191e-06	-0.471072	0.0157348	-1.48064	3.5077e-07	-0.455678	0.148009	-0.359297	0.86393
PFLU_4748	alanyl-tRNA synthetase	1.94867	1.90322e-08	1.65307	1.15735e-07	1.49329	6.1403e-07	1.51223	4.10255e-07	-0.455384	0.148009	-0.140844	0.998188
PFLU_1766	putative cytochrome C biogenesis protein	0.388499	0.107145	-0.0364443	0.881305	-0.0665244	0.806695	-0.167205	0.517306	-0.455023	0.217367	-0.130761	0.998188
PFLU_4499	putative phosphoribosylaminoimidazole synthetase	2.1199	1.09965e-08	2.44964	1.26289e-09	1.66507	2.68231e-07	2.33794	2.66623e-09	-0.454835	0.156264	-0.111702	0.998188
PFLU_2076	putative exported protein	-1.48976	1.11278e-06	-2.97945	2.53358e-10	-1.94429	7.02055e-08	-3.02601	4.55307e-10	-0.454534	0.185333	-0.0465554	0.998188
PFLU_1276	dxr, 1-deoxy-D-xylulose 5-phosphate reductoisomerase	0.851965	7.78026e-06	0.633453	0.000165197	0.397727	0.00979583	0.627308	0.000242649	-0.454238	0.0761736	-0.00614519	0.998391
PFLU_2858	hypothetical protein	0.886682	0.266222	1.32108	0.0793989	0.432605	0.641757	0.840473	0.335345	-0.454077	0.680294	-0.480603	0.998188
PFLU_0014	conserved hypothetical protein	0.619247	0.0229561	0.531908	0.044985	0.165461	0.566892	0.526932	0.0583975	-0.453786	0.248721	-0.00497675	0.998391
PFLU_1523	putative RNA methyltransferase	0.153398	0.661221	0.0216138	0.949523	-0.300342	0.407961	-0.200548	0.581532	-0.45374	0.378918	-0.222162	0.998188
PFLU_0162	putative lipoprotein	1.46537	3.33367e-06	0.751479	0.00259846	1.01259	0.000274811	0.926533	0.000636368	-0.452777	0.171058	0.175054	0.998188
PFLU_5041	trehalose operon transcriptional repressor	0.217633	0.403736	-0.183501	0.481373	-0.23488	0.399732	-0.212356	0.44742	-0.452513	0.250967	-0.0288556	0.998188
PFLU_6114	glmS, glucosamine--fructose-6-phosphate aminotransferase	0.874848	0.000184833	0.623892	0.00303561	0.422774	0.0375414	0.648735	0.00266411	-0.452073	0.15458	0.0248423	0.998188
PFLU_4023	putative allophanate hydrolase subunit 1	-0.759922	0.0955371	-0.791029	0.0791237	-1.21147	0.0221647	-0.209738	0.661979	-0.451552	0.568506	0.581291	0.998188
PFLU_0770	yaaD, probable FKBP-type 16 kDa peptidyl-prolyl cis-trans isomerase	1.74529	1.12309e-07	1.83731	4.36994e-08	1.29456	6.91037e-06	1.89759	4.02907e-08	-0.450734	0.142003	0.0602861	0.998188
PFLU_3192	putative adhesin activator protein	-0.67823	0.00558833	-2.47663	1.05069e-08	-1.12885	0.000106977	-2.27646	6.03263e-08	-0.450621	0.220639	0.200165	0.998188
PFLU_5724	rhlE1, putative ATP-dependent RNA helicase	2.1508	6.60422e-11	2.43087	1.02585e-11	1.70035	1.58429e-09	2.45127	1.05428e-11	-0.45045	0.0761736	0.0204021	0.998188
PFLU_1478	putative lipoprotein	1.81822	6.95414e-09	1.84803	4.0549e-09	1.36846	2.91048e-07	1.70181	1.37013e-08	-0.449759	0.117366	-0.146221	0.998188
PFLU_3679	putative phosphomannomutase (pseudogene)	1.2743	0.00503415	0.703281	0.103252	0.824846	0.072668	0.243472	0.623081	-0.44945	0.427082	-0.459809	0.998188
PFLU_0033	dgoT, D-galactonate transporter	1.11279	0.000196217	1.09782	0.000197885	0.664487	0.0155055	0.789541	0.00513447	-0.448305	0.213251	-0.308278	0.996009
PFLU_0729	putative GTP-binding protein	0.89371	2.69567e-05	0.567724	0.0017786	0.44543	0.0123779	0.264519	0.11883	-0.44828	0.113861	-0.303205	0.86393
PFLU_0376	putative ABC transport system, exported protein	-0.211909	0.433358	-0.392408	0.138457	-0.659803	0.0221828	-0.700717	0.0163967	-0.447894	0.290111	-0.308309	0.998188
PFLU_5578	ksgA, dimethyladenosine transferase	0.74905	0.00403757	0.250995	0.296499	0.301792	0.230487	-0.0394359	0.882766	-0.447259	0.214688	-0.290431	0.998188
PFLU_0781	conserved hypothetical protein	0.0366473	0.89989	0.211382	0.422541	-0.409967	0.148475	0.148494	0.595325	-0.446614	0.28869	-0.0628873	0.998188
PFLU_3525	putative acyl-CoA synthetase	0.176919	0.471046	-0.0231164	0.924921	-0.26963	0.285984	-0.14586	0.566388	-0.446549	0.23937	-0.122744	0.998188
PFLU_3666	putative glycosyltransferase	0.904297	0.0104039	-0.051888	0.883676	0.457875	0.202034	0.128077	0.736415	-0.446422	0.34636	0.179965	0.998188
PFLU_0010	glyS, glycyl-tRNA synthetase beta chain (ec 6.1.1.14) (glycine--trna ligase beta chain) (glyrs)	2.12442	1.67589e-09	2.15816	9.5606e-10	1.67825	3.92642e-08	1.95359	4.09159e-09	-0.446171	0.126115	-0.204566	0.998188
PFLU_5078	S-adenosylmethionine:tRNA ribosyltransferase-isomerase	2.44288	1.57378e-07	2.59279	5.56258e-08	1.99692	2.83087e-06	2.41743	1.91578e-07	-0.445958	0.247788	-0.175363	0.998188
PFLU_0473	putative TonB-dependent exported protein	0.295081	0.190311	0.558192	0.0149037	-0.150772	0.545239	0.719331	0.00390613	-0.445853	0.194956	0.161139	0.998188
PFLU_0262	conserved hypothetical protein	-0.433275	0.116346	-1.13942	0.000473797	-0.878706	0.00550964	-1.07919	0.00142492	-0.445431	0.314928	0.0602258	0.998188
PFLU_2424	putative type II secretion pathway protein E	-0.66424	0.0133843	-0.504124	0.0472049	-1.10926	0.000697748	-0.259602	0.330549	-0.445015	0.296956	0.244522	0.998188
PFLU_6026	conserved hypothetical protein	2.06567	1.05784e-08	0.647507	0.00381514	1.62358	3.55676e-07	0.693213	0.00339255	-0.442084	0.138737	0.0457054	0.998188
PFLU_0304	wssE, cellulose synthase operon protein C precursor	0.255265	0.0969855	-0.841553	2.41277e-05	-0.186346	0.236845	-0.961449	9.40044e-06	-0.441611	0.107323	-0.119896	0.998188
PFLU_0354	putative exported protein	-0.201933	0.296736	-0.487136	0.0149934	-0.642974	0.00351862	-0.727957	0.0014318	-0.44104	0.167298	-0.24082	0.998188
PFLU_5510	rpsE, 30S ribosomal protein S5	2.95958	8.68164e-11	3.17679	2.55682e-11	2.51949	7.17881e-10	3.06309	4.38766e-11	-0.440084	0.15314	-0.113704	0.998188
PFLU_3374	conserved hypothetical protein	-0.717778	0.00421269	-1.81179	4.87531e-07	-1.15734	0.000103029	-1.79186	1.11229e-06	-0.439561	0.241619	0.0199352	0.998391
PFLU_0533	rpsF, 30S ribosomal protein S6	4.15202	4.43131e-12	4.30071	1.72425e-12	3.71271	1.44835e-11	4.22971	2.33071e-12	-0.439309	0.159726	-0.0709986	0.998188
PFLU_0305	wssF, cell morphology-related protein	0.890806	0.00553327	0.107979	0.730296	0.451912	0.155171	-0.47494	0.16707	-0.438894	0.311393	-0.582919	0.869376
PFLU_1348	conserved hypothetical protein	-3.34922	9.18424e-11	-4.18834	6.19918e-12	-3.78663	3.15989e-11	-4.27911	7.00485e-12	-0.437406	0.209784	-0.0907785	0.998188
PFLU_1215	putative LysR-family regulatory protein	-1.56676	8.98123e-06	-1.64647	4.39619e-06	-2.00414	1.43006e-06	-1.98559	1.75792e-06	-0.437373	0.336283	-0.339122	0.998188
PFLU_1232	putative lipoprotein	0.179182	0.203123	-0.153622	0.271917	-0.257997	0.0808709	-0.136048	0.349203	-0.437178	0.0924523	0.0175736	0.998188
PFLU_1669	putative membrane protein	0.109413	0.69103	-1.29585	0.000179656	-0.327457	0.261822	-0.800453	0.0126412	-0.43687	0.278065	0.495395	0.967166
PFLU_1061	era, GTP-binding protein	-0.513803	0.000681765	-0.871868	2.51669e-06	-0.950122	1.55294e-06	-0.893277	2.74499e-06	-0.436318	0.0823812	-0.0214088	0.998188
PFLU_2932	putative fatty acid hydrolase	-0.405143	0.141643	-0.887171	0.00356936	-0.841064	0.0086567	-0.531007	0.0765306	-0.435921	0.326159	0.356165	0.998188
PFLU_3935	putative lipoprotein	-0.405642	0.202549	-0.2851	0.362528	-0.841294	0.0169856	-0.599078	0.0758495	-0.435652	0.39125	-0.313978	0.998188
PFLU_5795	conserved hypothetical protein	2.11733	5.4508e-08	2.48056	4.53241e-09	1.68258	1.49334e-06	2.3388	1.42085e-08	-0.434754	0.17793	-0.141757	0.998188
PFLU_5531	rpsG, 30S ribosomal protein S7	2.36498	5.74162e-11	2.67674	8.97968e-12	1.93067	8.39646e-10	2.62657	1.24997e-11	-0.434306	0.101156	-0.0501704	0.998188
PFLU_5412	putaitve DNA polymerase III, delta subunit	0.605226	0.00666989	0.387299	0.0641754	0.171063	0.441816	0.454495	0.0389796	-0.434163	0.180411	0.0671958	0.998188
PFLU_6130	putative iron-related RNA polymerase sigma factor	-1.15668	7.63662e-05	-0.538652	0.020601	-1.59034	6.70263e-06	-0.664832	0.00965018	-0.433663	0.287698	-0.12618	0.998188
PFLU_0798	ampD, N-acetyl-anhydromuramyl-L-alanine amidase	1.44531	2.36671e-06	1.19669	1.84495e-05	1.01166	0.000190174	1.11932	6.06125e-05	-0.433651	0.171872	-0.0773675	0.998188
PFLU_1811	putative glucans synthase	0.245579	0.28695	0.221138	0.330208	-0.187929	0.438858	0.188329	0.424272	-0.433507	0.22603	-0.032809	0.998188
PFLU_0894	murA, UDP-N-acetylglucosamine 1-carboxyvinyltransferase	2.03498	1.64201e-09	2.12668	6.66726e-10	1.60153	4.02252e-08	2.04199	1.29462e-09	-0.433447	0.124729	-0.0846854	0.998188
PFLU_5077	queuine tRNA-ribosyltransferase	1.23711	5.84937e-07	1.21505	5.89352e-07	0.804329	0.000103175	0.990355	9.26857e-06	-0.432779	0.116692	-0.224694	0.990668
PFLU_1860	putative dipeptidase	0.631925	0.00143378	0.158972	0.364979	0.199637	0.270019	-0.0668757	0.717496	-0.432288	0.145451	-0.225847	0.998188
PFLU_0459	aceF, dihydrolipoyllysine-residue acetyltransferase component of pyruvate dehydrogenase complex	0.337609	0.0365342	0.0511052	0.748047	-0.0946069	0.564079	-0.188548	0.229006	-0.432216	0.11921	-0.239653	0.990668
PFLU_0570	putative membrane protein	-0.417992	0.0585529	-0.384691	0.0748679	-0.849894	0.0012811	-0.556538	0.0202143	-0.431902	0.222164	-0.171847	0.998188
PFLU_3220	putative non-ribosomal antibiotic-related peptide synthase	-2.85883	2.27374e-09	-2.78472	2.16098e-09	-3.29063	1.03229e-09	-2.84717	3.75151e-09	-0.431804	0.315165	-0.0624571	0.998188
PFLU_2639	putative substrate-binding transport protein	0.518458	0.0119018	0.312797	0.108392	0.0868373	0.683778	0.0798165	0.702839	-0.431621	0.167298	-0.232981	0.998188
PFLU_0050	putative exported protein	1.01105	0.00808025	1.16455	0.00257442	0.580487	0.137616	0.90794	0.0214081	-0.430566	0.37942	-0.256614	0.998188
PFLU_3033	putative membrane protein	0.45242	0.403521	1.55582	0.00521875	0.0218805	0.97012	1.25007	0.023309	-0.430539	0.607115	-0.305754	0.998188
PFLU_0528	putative iron-binding periplasmic protein	-1.72833	5.07016e-07	-1.50274	2.01686e-06	-2.15882	6.65612e-08	-1.6144	1.50289e-06	-0.430486	0.25508	-0.111655	0.998188
PFLU_0338	putative rhodanese domain containing protein	2.00838	1.13545e-07	2.10711	4.61639e-08	1.57805	3.33632e-06	2.07296	7.90508e-08	-0.430324	0.183509	-0.0341508	0.998188
PFLU_3191	putative adhesin	0.146033	0.425338	-0.356133	0.0497555	-0.283472	0.123814	-0.258108	0.152412	-0.429506	0.156264	0.0980252	0.998188
PFLU_4221	putative cobalamin ABC transport system, ATP-binding protein	-0.510944	0.0555008	-0.736726	0.00827897	-0.94042	0.00290965	-0.269945	0.325362	-0.429476	0.316777	0.466781	0.922796
PFLU_5014	putative membrane protein	2.59259	2.51197e-10	2.505	2.76053e-10	2.16353	3.90952e-09	2.59021	2.3933e-10	-0.429058	0.122581	0.0852074	0.998188
PFLU_4050	putative acetyltransferase	0.672692	0.02472	0.152698	0.60214	0.243645	0.425907	0.323522	0.278341	-0.429047	0.328378	0.170825	0.998188
PFLU_3998	putative exported protein	0.0813498	0.73436	-0.735587	0.0035846	-0.347629	0.150389	-0.714143	0.00705634	-0.428979	0.230594	0.0214435	0.998391
PFLU_2067	polB, DNA polymerase II	-0.395069	0.0136112	-0.689021	0.000167433	-0.824043	4.3461e-05	-0.821244	4.11438e-05	-0.428974	0.117366	-0.132223	0.998188
PFLU_0267	pckA, phosphoenolpyruvate carboxykinase [ATP]	1.84196	3.3162e-08	2.16109	3.13611e-09	1.41303	1.01568e-06	2.08678	5.7483e-09	-0.428933	0.160496	-0.0743081	0.998188
PFLU_5175	FKBP-type peptidyl-prolyl cis-trans isomerase	0.514373	0.00309482	0.0903884	0.569841	0.0855719	0.609547	-0.1253	0.441462	-0.428801	0.11921	-0.215688	0.992665
PFLU_0898	uraA, uracil permease	-0.649279	0.000111076	-1.64243	1.49404e-09	-1.07786	5.12691e-07	-1.58275	3.73143e-09	-0.428583	0.0934348	0.0596816	0.998188
PFLU_5054	conserved hypothetical protein	0.789653	2.58987e-05	0.378044	0.0120392	0.361374	0.0181618	0.0666555	0.655111	-0.428279	0.100451	-0.311388	0.739959
PFLU_4907	putative OmpA family lipoprotein	1.02261	3.60016e-06	0.250733	0.106676	0.594633	0.000956571	0.456321	0.00636316	-0.42798	0.119569	0.205588	0.998188
PFLU_1550	putative ABC transport system, ATP-binding protein	0.909459	7.58543e-05	1.0037	2.23846e-05	0.481555	0.014452	0.884718	0.000101845	-0.427904	0.156264	-0.118979	0.998188
PFLU_0155	putative membrane protein	-0.714327	0.0581462	-0.95761	0.0141948	-1.14213	0.00920655	-0.907101	0.0310641	-0.427803	0.49352	0.0505096	0.998188
PFLU_5815	thyA, thymidylate synthase	1.23343	3.182e-06	1.22585	2.8412e-06	0.806989	0.000335517	0.998939	3.37857e-05	-0.426436	0.159726	-0.22691	0.998188
PFLU_6096	putative cardiolipin synthase family protein	-0.215243	0.401175	-0.820358	0.00328551	-0.641278	0.0207353	-0.632336	0.0227769	-0.426035	0.289878	0.188022	0.998188
PFLU_1145	putative ABC transport system, ATP-binding protein	1.53537	1.7471e-08	1.44003	3.05114e-08	1.10954	1.52593e-06	1.41311	5.49091e-08	-0.42583	0.100451	-0.0269213	0.998188
PFLU_1302A	capB, cold shock protein	2.41823	1.35942e-09	2.43498	8.76061e-10	1.99244	1.65809e-08	2.25139	2.6322e-09	-0.425793	0.169703	-0.183587	0.998188
PFLU_0772	putative type IV pilus related protein	0.279878	0.181654	0.236655	0.252814	-0.145849	0.564523	0.12732	0.57163	-0.425727	0.185951	-0.109335	0.998188
PFLU_5010	tRNA (guanine-N1)-methyltransferase	2.89902	3.63321e-11	2.99921	1.63319e-11	2.47338	2.795e-10	2.90338	2.69626e-11	-0.425637	0.139675	-0.0958243	0.998188
PFLU_5530	fusA, elongation factor G	2.39937	1.89892e-10	2.67394	3.53768e-11	1.97433	2.29834e-09	2.56751	6.26554e-11	-0.425035	0.134336	-0.106425	0.998188
PFLU_2822	putative phage-related protein	0.969392	0.0444026	1.42401	0.0035349	0.544442	0.302682	1.44383	0.00537594	-0.42495	0.502569	0.0198153	0.998391
PFLU_3901	putative fimbriae-related protein	-1.83871	1.9078e-09	-2.41358	5.10383e-11	-2.26349	2.27572e-10	-2.40184	8.6462e-11	-0.424786	0.126115	0.0117357	0.998391
PFLU_4765	putative histidine-binding periplasmic protein precursor	0.184488	0.178652	0.14323	0.289033	-0.239427	0.0869133	0.093456	0.497422	-0.423915	0.0934348	-0.0497744	0.998188
PFLU_0768	ileS, isoleucyl-tRNA synthetase	1.7041	2.11163e-08	1.89784	3.88414e-09	1.2804	8.24424e-07	1.66931	2.28798e-08	-0.4237	0.142665	-0.228527	0.992665
PFLU_5537	rplA, 50S ribosomal protein L1	2.60497	2.6367e-11	2.68578	1.21355e-11	2.1818	2.55227e-10	2.47627	3.54939e-11	-0.423172	0.113861	-0.209515	0.990972
PFLU_3937	putative membrane protein	0.495934	0.199423	1.12765	0.00441672	0.0730236	0.872533	0.942574	0.0210277	-0.422911	0.449793	-0.185079	0.998188
PFLU_0401	argS, arginyl-tRNA synthetase	0.571033	0.00601881	1.02278	3.10085e-05	0.148397	0.459157	0.873985	0.000177801	-0.422636	0.176357	-0.148793	0.998188
PFLU_0740	moeB, molybdopterin biosynthesis protein	0.892386	0.000435792	1.07149	6.12855e-05	0.47009	0.0422612	0.745389	0.00245338	-0.422296	0.195653	-0.326102	0.9669
PFLU_3243	conserved hypothetical protein	-0.456677	0.123696	-0.430707	0.139647	-0.87808	0.00834028	-0.587017	0.059483	-0.421403	0.372571	-0.15631	0.998188
PFLU_4843	ABC transport system, ATP-binding component	0.981772	6.38794e-05	0.0920205	0.639371	0.560754	0.00775219	-0.0427626	0.832622	-0.421018	0.180411	-0.134783	0.998188
PFLU_5177	putative putative glyoxalase	1.41608	0.00121918	1.30389	0.00227013	0.995325	0.0224259	1.4131	0.00187133	-0.42075	0.400305	0.109204	0.998188
PFLU_4425	flagellar biosynthesis	-2.45384	8.23822e-10	-3.20481	2.81114e-11	-2.87451	2.06231e-10	-3.3731	2.86882e-11	-0.420662	0.18808	-0.168285	0.998188
PFLU_6102	conserved hypothetical protein	1.25583	0.00019883	1.03182	0.00115388	0.836286	0.00900663	0.794255	0.0131989	-0.419542	0.276909	-0.237564	0.998188
PFLU_4052	probable LysR-family transcriptional regulator	-0.280583	0.200666	-0.711494	0.00323335	-0.699906	0.00586289	-1.33146	3.93403e-05	-0.419323	0.232958	-0.619961	0.616112
PFLU_4225	putative sensory protein	0.664034	0.0188477	0.329361	0.223487	0.244799	0.394699	0.749078	0.010697	-0.419235	0.305937	0.419717	0.962751
PFLU_5109	putative lipoprotein	1.37577	0.000615055	0.806326	0.0268052	0.956575	0.0135058	0.753047	0.0496596	-0.419199	0.375956	-0.0532786	0.998188
PFLU_3481	conserved hypothetical protein	0.494902	0.0739956	-0.039762	0.888085	0.0764705	0.808227	0.0632147	0.836083	-0.418432	0.307487	0.102977	0.998188
PFLU_2026	putative membrane protein	0.461219	0.0224767	-0.209651	0.2881	0.0430256	0.846045	-0.0851535	0.688638	-0.418194	0.174575	0.124498	0.998188
PFLU_4027	aspartate aminotransferase	-0.287324	0.586739	0.414301	0.384406	-0.705122	0.222478	1.03742	0.0366042	-0.417798	0.620984	0.623115	0.990668
PFLU_2631	putative ABC transport system, ATP-binding protein	0.66147	0.0017352	0.177112	0.352368	0.244506	0.220935	0.291627	0.142257	-0.416964	0.160832	0.114516	0.998188
PFLU_5318	putative membrane protein	0.515818	0.172205	0.267754	0.47865	0.100908	0.814426	0.135875	0.738724	-0.41491	0.467669	-0.131879	0.998188
PFLU_3925	peptidyl-prolyl cis-trans isomerase	1.8806	2.44224e-09	1.41594	6.99549e-08	1.46591	6.75676e-08	1.37058	1.22148e-07	-0.414686	0.126115	-0.0453633	0.998188
PFLU_5503	rpsD, 30S ribosomal protein S4	2.74918	1.67917e-10	2.709	1.40019e-10	2.3358	1.37642e-09	2.64246	2.04838e-10	-0.41338	0.16715	-0.0665391	0.998188
PFLU_3414	putative membrane protein	-0.56018	0.0096883	-1.52663	9.75743e-07	-0.973155	0.000206263	-1.6976	9.05146e-07	-0.412975	0.217367	-0.170969	0.998188
PFLU_1578	putative GTP cyclohydrolase I	3.11509	3.51379e-12	3.13475	1.84982e-12	2.70218	1.80657e-11	2.8195	7.06493e-12	-0.41291	0.113046	-0.315257	0.739959
PFLU_5160	conserved hypothetical protein	1.46115	9.29361e-05	1.49227	6.31456e-05	1.0492	0.00280282	1.42392	0.000162185	-0.411942	0.320787	-0.0683404	0.998188
PFLU_6036	ubiA, 4-hydroxybenzoate octaprenyltransferase	0.89606	0.000392516	0.303752	0.161083	0.484245	0.0354999	0.0225928	0.925304	-0.411815	0.199965	-0.281159	0.998188
PFLU_3656	hypothetical protein	0.565964	0.0316571	0.0900147	0.73339	0.154189	0.57935	-0.0374096	0.895201	-0.411775	0.285358	-0.127424	0.998188
PFLU_6010	putative serine/threonine protein kinase	1.04086	2.55273e-06	-0.149724	0.342899	0.629206	0.000654537	0.122634	0.452816	-0.411652	0.117366	0.272358	0.922796
PFLU_0671	conserved hypothetical protein	0.507391	0.175347	0.39742	0.283777	0.0960744	0.824269	0.333608	0.403177	-0.411316	0.452932	-0.0638122	0.998188
PFLU_5061	nucleoside diphosphate kinase	1.07014	4.415e-06	0.884195	3.1077e-05	0.65981	0.000695213	0.67778	0.000483426	-0.410326	0.147077	-0.206415	0.998188
PFLU_0481	msbA, lipid A export ATP-binding/permease protein	1.85976	4.89436e-09	1.97323	1.61187e-09	1.44964	1.62437e-07	1.84066	5.37105e-09	-0.410113	0.129469	-0.132578	0.998188
PFLU_3936	putative transport related membrane protein	-0.497093	0.133797	-0.182787	0.574522	-0.90695	0.0136023	-0.395924	0.244516	-0.409857	0.437871	-0.213137	0.998188
PFLU_3798	putative transmembrane CrcB family homolog	1.94414	4.11822e-07	1.93251	3.5856e-07	1.53446	1.25562e-05	2.03741	2.75328e-07	-0.409682	0.217367	0.104906	0.998188
PFLU_2195	putative transport-related membrane protein	-0.224152	0.219868	-0.373049	0.0426576	-0.633788	0.00271678	-0.603787	0.00390594	-0.409636	0.173658	-0.230738	0.998188
PFLU_1135	putative two-component system, sensor kinase	-0.890567	5.98619e-05	-1.32827	5.89891e-07	-1.29986	1.39682e-06	-1.60068	1.11559e-07	-0.409291	0.170196	-0.272412	0.990668
PFLU_3412	hypothetical protein	-0.4014	0.0828007	-1.83446	4.06897e-07	-0.809599	0.00212157	-1.73896	1.39254e-06	-0.408198	0.265581	0.0955053	0.998188
PFLU_1616	putative lipoprotein	-4.29693	1.71505e-10	-4.02874	2.11706e-10	-4.70506	1.67985e-10	-4.17314	3.84411e-10	-0.408123	0.473044	-0.144402	0.998188
PFLU_5330	glyA, serine hydroxymethyltransferase	2.1855	1.10401e-08	2.34238	3.33893e-09	1.77807	1.63106e-07	2.25305	6.2808e-09	-0.407433	0.197931	-0.0893325	0.998188
PFLU_0302	wssC, cyclic di-GMP binding protein	-0.0214676	0.933866	-0.74658	0.00317869	-0.428629	0.0766534	-0.844968	0.00196337	-0.407161	0.257365	-0.0983884	0.998188
PFLU_5144	putative membrane protein	2.20342	2.81724e-05	1.22395	0.00559417	1.79667	0.000294629	1.37928	0.0030217	-0.406745	0.458896	0.155325	0.998188
PFLU_5864	conserved hypothetical protein	1.42082	6.15908e-06	1.49937	2.70625e-06	1.01421	0.000278084	1.27405	2.3156e-05	-0.40661	0.229602	-0.225319	0.998188
PFLU_2072	putative membrane protein	-1.67885	1.2581e-06	-2.83369	2.32823e-09	-2.08517	1.61065e-07	-2.57693	1.33891e-08	-0.406324	0.295972	0.256761	0.998188
PFLU_1636	putative peptide ABC transport system, substrate-binding protein	1.40411	1.13682e-05	0.508946	0.0382943	0.998385	0.000501096	0.510939	0.0451007	-0.405721	0.246051	0.00199279	0.998705
PFLU_3041	putative formyl transferase	-1.08646	1.06197e-06	-2.10896	2.0736e-10	-1.49185	2.51082e-08	-2.17226	1.79688e-10	-0.405393	0.126115	-0.0633026	0.998188
PFLU_4189	pseudouridylate synthase I	0.32531	0.0751765	0.5373	0.00509024	-0.0800703	0.681171	0.352707	0.0574242	-0.40538	0.167298	-0.184593	0.998188
PFLU_5034	phosphoribosylformylglycinamidine synthase	2.34163	6.55131e-10	2.61698	1.22483e-10	1.93637	7.62254e-09	2.35813	4.80791e-10	-0.405254	0.159726	-0.258849	0.990668
PFLU_6093	conserved hypothetical protein	0.651168	0.0590181	0.446937	0.188618	0.246633	0.513121	0.293321	0.433124	-0.404535	0.403765	-0.153616	0.998188
PFLU_4910	putative transport-related membrane protein	-0.624233	0.000775375	-1.12706	1.5222e-06	-1.02853	7.22351e-06	-1.18843	1.30178e-06	-0.404294	0.148009	-0.0613687	0.998188
PFLU_3813	adenylosuccinate lyase	1.78147	7.26892e-08	2.17252	4.13282e-09	1.37721	2.00647e-06	2.1492	5.72991e-09	-0.40426	0.182305	-0.0233207	0.998188
PFLU_3569	putative membrane protein	0.759175	0.00239055	0.616319	0.00949457	0.355366	0.140129	0.3708	0.123141	-0.403808	0.22833	-0.245519	0.998188
PFLU_0934	hypothetical protein	1.65114	0.0011712	1.71379	0.000729557	1.24751	0.0146955	1.78142	0.000847229	-0.403628	0.473795	0.0676329	0.998188
PFLU_0923	conserved hypothetical protein	-2.30275	7.50183e-08	-2.94414	3.01993e-09	-2.70618	1.24346e-08	-2.62841	1.28357e-08	-0.403432	0.309024	0.315728	0.998188
PFLU_1013	putative exported protein	0.0548489	0.939736	-0.107084	0.87026	-0.348563	0.643108	0.436769	0.518932	-0.403412	0.687945	0.543853	0.998188
PFLU_1475	putative redox-related protein	1.47373	2.66638e-06	1.49204	1.88487e-06	1.07036	0.000123984	1.22268	2.64527e-05	-0.403371	0.213924	-0.269366	0.998188
PFLU_3983	permease component of ABC transporter protein	-0.944575	0.00621306	-1.17878	0.00119864	-1.34793	0.000823668	-1.00245	0.00683972	-0.403354	0.458896	0.17633	0.998188
PFLU_3780	putative lipoprotein	1.23774	0.00094218	1.53135	0.000100922	0.835072	0.0212856	1.28128	0.000947374	-0.402669	0.367675	-0.250067	0.998188
PFLU_4135	hypothetical phage-related protein	1.07541	0.0787681	1.10516	0.0658746	0.672909	0.316847	1.731	0.00723461	-0.402503	0.620984	0.625838	0.992665
PFLU_5331	putative cobalamin synthesis-related protein	0.0902062	0.759591	-0.174111	0.536772	-0.312247	0.295989	0.0436355	0.885584	-0.402453	0.347872	0.217746	0.998188
PFLU_0757	putative TonB-dependent exported protein	-0.99665	0.00141483	-1.4255	4.93492e-05	-1.39828	9.54465e-05	-1.88978	4.6391e-06	-0.40163	0.368932	-0.464276	0.989476
PFLU_5577	pdxA, 4-hydroxythreonine-4-phosphate dehydrogenase	1.21951	2.99127e-05	0.977578	0.000259113	0.818203	0.00181065	0.992421	0.000314288	-0.401304	0.224075	0.0148437	0.998391
PFLU_2837	conserved hypothetical protein	-0.0766117	0.893747	-0.175533	0.74348	-0.477566	0.429942	0.483294	0.3744	-0.400954	0.633461	0.658827	0.992665
PFLU_5248	osmotically inducible protein Y	1.46947	2.48755e-05	1.74016	3.23606e-06	1.06853	0.000581885	2.20951	2.12785e-07	-0.400939	0.332741	0.469344	0.904366
PFLU_1282	lpxA, acyl-[acyl-carrier-protein]--UDP-N-acetylglucos am ine O-acyltransferase	-0.139524	0.464443	-0.510514	0.00962138	-0.539672	0.00872474	-0.689429	0.00147442	-0.400149	0.184089	-0.178914	0.998188
PFLU_4955	alpha-ketoglutarate permease	-0.196526	0.639579	0.513079	0.189895	-0.596193	0.160265	0.652364	0.104601	-0.399667	0.535803	0.139285	0.998188
PFLU_0863	mreB, rod shape-determining protein	2.21482	1.51236e-09	1.99856	3.88955e-09	1.81541	2.08215e-08	1.91278	7.97172e-09	-0.399417	0.165973	-0.0857871	0.998188
PFLU_5772	trmB, tRNA (guanine-N(7)-)-methyltransferase)	2.40197	1.23494e-07	2.44144	7.68792e-08	2.00275	1.76252e-06	2.25346	3.1239e-07	-0.399218	0.279503	-0.187974	0.998188
PFLU_4702	4-amino-4-deoxychorismate lyase	0.276751	0.284661	0.2295	0.368476	-0.122293	0.665598	0.266387	0.317294	-0.399045	0.313149	0.0368867	0.998188
PFLU_0536	rplI, 50S ribosomal protein L9	0.553812	0.00258003	0.632313	0.000788279	0.155008	0.361747	0.544614	0.00280691	-0.398804	0.15433	-0.0876992	0.998188
PFLU_0099	putative membrane protein	0.793362	0.000741838	0.907676	0.000185995	0.394707	0.069319	0.948008	0.000169354	-0.398655	0.195653	0.0403325	0.998188
PFLU_0011	glyQ, glycyl-tRNA synthetase alpha chain	2.27256	3.45729e-09	2.40213	1.19729e-09	1.87568	4.96197e-08	2.35882	1.84727e-09	-0.396871	0.180411	-0.0433143	0.998188
PFLU_4699	DNA polymerase III, delta subunit	1.19862	0.000169541	1.24484	0.000100275	0.802226	0.00653852	0.938748	0.00198589	-0.396393	0.295819	-0.30609	0.998188
PFLU_0387	putative ubiquinone biosynthesis-related protein	0.545479	0.00605626	0.0936787	0.6162	0.149467	0.444536	0.125822	0.515685	-0.396012	0.176562	0.0321436	0.998188
PFLU_0565	putative TetR-family regulatory protein	2.03201	5.18421e-05	2.80946	6.07148e-07	1.63613	0.00080387	2.77769	1.11861e-06	-0.395881	0.410076	-0.0317711	0.998188
PFLU_6001	putative exported protein	-0.142555	0.519932	0.468252	0.0304557	-0.538338	0.0219931	0.176841	0.423237	-0.395783	0.249749	-0.291412	0.990972
PFLU_5220	acetolactate synthase isozyme III large subunit	2.7838	1.94943e-10	2.77714	1.40312e-10	2.3881	1.47088e-09	2.70085	2.18325e-10	-0.395702	0.181096	-0.076291	0.998188
PFLU_5816	lgt, prolipoprotein diacylglyceryl transferase	2.06292	2.58887e-07	1.79985	1.09426e-06	1.66743	3.86366e-06	1.51449	9.85747e-06	-0.395488	0.292413	-0.28536	0.998188
PFLU_0854	conserved hypothetical membrane protein	0.500972	0.107628	0.648284	0.0360549	0.106079	0.766465	0.502071	0.123815	-0.394893	0.378853	-0.146213	0.998188
PFLU_1565	mfd, transcription-repair coupling factor	1.45427	3.44231e-07	1.84793	1.2953e-08	1.05984	1.66101e-05	1.73767	3.27726e-08	-0.394428	0.175897	-0.110254	0.998188
PFLU_1519	putative nitroreductase	1.74694	7.43068e-08	1.72225	6.74411e-08	1.35263	2.05631e-06	1.70082	9.33056e-08	-0.394309	0.183509	-0.0214248	0.998188
PFLU_3997	putative membrane protein	0.306562	0.213715	-0.605932	0.0215005	-0.0875093	0.75458	-0.60668	0.0325113	-0.394071	0.291008	-0.000747267	0.998705
PFLU_5463	putative TonB-dependent receptor exported protein	1.60727	3.08764e-05	1.57155	3.37575e-05	1.21338	0.000799655	1.41057	0.000185583	-0.393897	0.323384	-0.160983	0.998188
PFLU_5776	mtgA, monofunctional biosynthetic peptidoglycan transglycosylase	0.976401	0.000376928	1.41094	6.02908e-06	0.58252	0.0216462	1.19947	5.68751e-05	-0.393881	0.248291	-0.211472	0.998188
PFLU_3580	putative exported protein	0.61918	0.00343041	0.445772	0.0242191	0.225707	0.256527	0.332761	0.0923759	-0.393472	0.191722	-0.113011	0.998188
PFLU_2816	putative ABC tranmsport system, ATP-binding component	1.11105	4.65751e-05	1.23949	1.16542e-05	0.717767	0.00299448	1.02541	0.000115269	-0.39328	0.226661	-0.214078	0.998188
PFLU_4700	thymidylate kinase	0.29287	0.113306	0.324578	0.0751707	-0.100063	0.615053	0.254379	0.177557	-0.392932	0.17793	-0.0701982	0.998188
PFLU_0299	putative lipoprotein	0.598087	0.0444665	0.240613	0.4113	0.205541	0.515056	-0.0504991	0.876719	-0.392546	0.367369	-0.291112	0.998188
PFLU_0482	hldE, bifunctional protein HldE-core lipopolysaccharide biosynthesis	1.87847	4.93554e-09	2.18656	5.06716e-10	1.48603	1.21776e-07	2.14753	7.69175e-10	-0.392442	0.148009	-0.0390291	0.998188
PFLU_4168	putative glycerol phosphatase	1.27277	8.07183e-05	1.10817	0.000292912	0.880984	0.00336477	1.15628	0.000307989	-0.39179	0.278751	0.04811	0.998188
PFLU_3129	putative two-component response regulator transcriptional regulatory protein	-1.60038	3.03428e-06	-2.13467	1.00179e-07	-1.99206	5.55771e-07	-2.16031	2.3859e-07	-0.391677	0.345367	-0.0256449	0.998391
PFLU_5173	conserved hypothetical protein	2.55896	4.20028e-10	2.48325	4.48185e-10	2.16735	5.01669e-09	2.27216	1.99434e-09	-0.391614	0.156264	-0.211091	0.998188
PFLU_5984	dut, deoxyuridine 5-triphosphate nucleotidohydrolase	1.46116	4.90826e-05	1.47705	3.65934e-05	1.06974	0.0013614	1.6771	1.21725e-05	-0.391419	0.323923	0.200053	0.998188
PFLU_4647	putative hydrolase	1.55389	1.01673e-07	1.33177	5.81954e-07	1.16282	5.04572e-06	1.28102	1.35867e-06	-0.39107	0.15433	-0.0507511	0.998188
PFLU_3344	hypothetical protein	-0.35247	0.154924	-0.735155	0.00583634	-0.743482	0.00830728	-0.854898	0.00360419	-0.391012	0.322275	-0.119743	0.998188
PFLU_1226	peptide chain release factor 2 (pseudogene)	1.71036	8.32216e-08	1.90278	1.57854e-08	1.31972	2.44827e-06	1.72786	6.65965e-08	-0.390632	0.182696	-0.17492	0.998188
PFLU_3673	putative glycosyltransferase	1.58839	1.88208e-06	1.04418	0.000206169	1.19809	8.11023e-05	1.13784	0.000144402	-0.390303	0.215983	0.0936623	0.998188
PFLU_0857	pcaC, 4-carboxymuconolactone decarboxylase	0.385953	0.140339	0.112184	0.671431	-0.00399207	0.988889	0.0575775	0.839773	-0.389945	0.323384	-0.054606	0.998188
PFLU_0605	cobH, precorrin-8X methylmutase	-0.0848615	0.691035	-0.303749	0.13413	-0.474502	0.0319166	-0.269275	0.20578	-0.38964	0.2253	0.0344749	0.998188
PFLU_4482	7 alpha-ribazole-5-phosphate phosphatase	-0.368266	0.172346	-0.72968	0.0104395	-0.75761	0.0118496	-0.589831	0.0422095	-0.389343	0.361551	0.139849	0.998188
PFLU_6087	putative N-acetylmuramoyl-L-alanine amidase	1.38633	6.74544e-06	1.26792	1.59238e-05	0.996999	0.000332708	1.04474	0.000202661	-0.389334	0.225471	-0.22318	0.998188
PFLU_4997	putative transmembrane acid tolerance protein	0.515461	0.00340609	0.179722	0.259841	0.126495	0.450194	0.0779006	0.640331	-0.388966	0.148009	-0.101822	0.998188
PFLU_3675	putative flippase	2.38102	1.60203e-05	1.93533	0.000171232	1.99263	0.000206032	1.32523	0.00963343	-0.388395	0.418255	-0.610092	0.922796
PFLU_1112	putative two-component system, sensor kinase	-0.464996	0.024196	-0.815623	0.000444837	-0.852906	0.000449556	-0.847725	0.000465321	-0.38791	0.227908	-0.032102	0.998188
PFLU_5017	phosphoribosylglycinamide formyltransferase 2	2.0083	1.01193e-09	2.20492	2.13184e-10	1.62082	1.94988e-08	2.13635	3.98021e-10	-0.387474	0.137337	-0.0685725	0.998188
PFLU_5136	protoheme IX farnesyltransferase	1.60707	2.73355e-06	1.13465	0.000108599	1.21965	7.38205e-05	1.14712	0.000120781	-0.387411	0.279503	0.0124744	0.998391
PFLU_5637	conserved hypothetical protein	1.69407	1.29516e-06	1.69209	1.06264e-06	1.30683	4.45021e-05	1.56426	4.72082e-06	-0.387234	0.237	-0.127831	0.998188
PFLU_1134	putative two-component system, response regulator	-1.25227	8.22196e-06	-1.83472	8.18925e-08	-1.63917	5.94928e-07	-2.17391	2.21525e-08	-0.386901	0.25384	-0.339191	0.990668
PFLU_0617	accC, biotin carboxylase	-1.05084	0.000133487	-0.808792	0.00123072	-1.43753	5.76075e-06	-0.9735	0.000270323	-0.386695	0.280689	-0.164707	0.998188
PFLU_5253	protein chain initiation factor 2	2.20726	4.3137e-11	2.3321	1.46208e-11	1.82061	5.35774e-10	2.17526	3.76085e-11	-0.386651	0.109954	-0.156846	0.998188
PFLU_5146	putative LuxR-family regulatory protein	-1.70749	0.000177447	-2.07649	2.24475e-05	-2.09386	2.77289e-05	-2.09295	2.31358e-05	-0.386366	0.513751	-0.0164583	0.998391
PFLU_1161	metG, methionyl-tRNA synthetase	1.74289	1.58393e-08	2.0958	1.07731e-09	1.35667	4.32956e-07	1.99216	2.41616e-09	-0.386219	0.159726	-0.103646	0.998188
PFLU_0425	conserved hypothetical protein	-0.193419	0.397259	-0.868084	0.000936762	-0.579576	0.0205787	-1.13572	0.000211616	-0.386158	0.279503	-0.267639	0.998188
PFLU_1397	conserved hypothetical protein	0.229124	0.443469	-0.22643	0.450845	-0.156461	0.632841	-0.593878	0.079602	-0.385585	0.380613	-0.367448	0.998188
PFLU_5480	putative ABC transport system, ATP-binding protein	3.07501	2.21597e-09	2.74488	8.10674e-09	2.68982	1.94988e-08	2.27296	1.91886e-07	-0.385186	0.235277	-0.471917	0.728453
PFLU_5481	putative ABC transport system, membrane protein	3.07174	9.08315e-10	2.73183	3.33893e-09	2.68665	7.54998e-09	2.23432	8.81278e-08	-0.385087	0.212587	-0.497514	0.616112
PFLU_2093	putative dehydrogenase	0.116181	0.57734	-0.469086	0.0237569	-0.268668	0.195677	-0.52281	0.0158826	-0.384849	0.225389	-0.0537238	0.998188
PFLU_2642	3 membrane-bound lytic murein transglycosylase D precursor	1.94303	4.9173e-07	2.15258	1.07989e-07	1.5598	8.02287e-06	2.09616	1.78742e-07	-0.383227	0.296956	-0.0564249	0.998188
PFLU_5707	tktA, transketolase 1	1.19093	1.2581e-06	1.53603	4.33927e-08	0.807749	0.000103207	1.42855	1.16291e-07	-0.383183	0.16295	-0.107483	0.998188
PFLU_2684	conserved hypothetical protein	0.0263045	0.927485	-0.016718	0.948956	-0.356827	0.196959	-0.110026	0.692706	-0.383131	0.336459	-0.0933076	0.998188
PFLU_2776	putative membrane protein	-1.80804	0.00247569	-1.41374	0.00909205	-2.19077	0.00191428	-1.76315	0.00748105	-0.38273	0.751133	-0.349417	0.998188
PFLU_4774	putative LysR-family transcriptional regulator (pseudogene)	-0.440693	0.365901	-0.522947	0.277434	-0.82334	0.135645	0.255125	0.610639	-0.382647	0.636797	0.778072	0.923089
PFLU_5376	putative histone deacetylase family protein	0.35561	0.0560457	0.248732	0.170603	-0.0267635	0.947615	0.231762	0.224209	-0.382373	0.180411	-0.0169705	0.998391
PFLU_5721	metF, 5,10-methylenetetrahydrofolate reductase	1.42565	1.2125e-06	1.28791	3.41873e-06	1.04347	5.78243e-05	1.05574	4.63107e-05	-0.382175	0.194832	-0.232168	0.998188
PFLU_1314	putative pinecillin acylase protein	1.13824	3.74667e-06	1.25785	9.31035e-07	0.756723	0.000344154	1.12421	4.39909e-06	-0.381517	0.17034	-0.133642	0.998188
PFLU_1763	ccmF, cytochrome C biogenesis protein	-0.27213	0.160228	-0.681774	0.00154127	-0.653572	0.00289846	-0.768679	0.000780967	-0.381442	0.217367	-0.0869047	0.998188
PFLU_5461	ispA, geranyltranstransferase	1.46834	2.07923e-06	1.27445	9.28607e-06	1.08711	8.64018e-05	1.14842	4.40157e-05	-0.381236	0.220283	-0.126033	0.998188
PFLU_3227	putative transport-related protein	-0.531072	0.00826862	-0.0311073	0.868682	-0.912191	0.000173923	0.0976435	0.615202	-0.381119	0.216614	0.128751	0.998188
PFLU_5425	conserved hypothetical protein	0.737867	0.000133634	0.724422	0.000140867	0.35681	0.0323951	0.756314	0.000111292	-0.381057	0.148009	0.0318915	0.998188
PFLU_3761	hypothetical protein	1.27855	8.43355e-08	1.02938	9.85705e-07	0.897502	7.02373e-06	0.830749	1.41888e-05	-0.381051	0.124729	-0.198627	0.990972
PFLU_0350	typA, putative elongation facotr/GTP-binding protein TypA/BipA	0.890523	1.02205e-05	1.09629	7.36817e-07	0.509838	0.00229466	0.940511	4.92924e-06	-0.380684	0.138737	-0.15578	0.998188
PFLU_4431	conserved hypothetical protein	0.855861	0.00577991	0.94002	0.00260527	0.475198	0.125254	0.890178	0.00576985	-0.380663	0.350939	-0.0498418	0.998188
PFLU_5056	Histidyl-tRNA synthetase	0.735002	6.61946e-05	0.440127	0.00503728	0.354477	0.021791	0.354075	0.0205622	-0.380524	0.134191	-0.086052	0.998188
PFLU_0788	conserved hypothetical protein	-1.8673	0.00118862	-1.72383	0.00194259	-2.24761	0.000369754	-1.88833	0.00134841	-0.380307	0.660815	-0.164492	0.998188
PFLU_4802	conserved hypothetical protein with RNA polymerase sigma factor domain	-0.575392	0.014776	-0.621395	0.00857629	-0.955594	0.00042176	-0.818421	0.0014318	-0.380202	0.290111	-0.197026	0.998188
PFLU_5560	trpG, anthranilate synthase component II	0.920136	8.08908e-05	0.629609	0.00234156	0.54018	0.00963835	0.45398	0.0260467	-0.379956	0.18058	-0.175629	0.998188
PFLU_4965	glyceraldehyde 3-phosphate dehydrogenase 1	0.0240573	0.930879	-0.693127	0.00780885	-0.355596	0.155415	-0.776737	0.00392417	-0.379653	0.328378	-0.0836099	0.998188
PFLU_1064	putative multicopper oxidase	0.358672	0.0559927	0.886133	7.55705e-05	-0.020911	0.920902	0.788946	0.000318855	-0.379583	0.185951	-0.0971869	0.998188
PFLU_0649	putative membrane protein	-0.804423	0.0220997	-2.91338	2.05406e-07	-1.18352	0.00198392	-3.11401	1.12529e-07	-0.379101	0.478975	-0.200632	0.998188
PFLU_5961	rep, ATP-dependent DNA helicase	1.93475	2.15333e-06	2.18364	3.78173e-07	1.55667	3.7259e-05	2.02831	1.32064e-06	-0.378084	0.329345	-0.155328	0.998188
PFLU_3766	hypothetical protein	-3.58534	2.46816e-11	-3.5349	1.896e-11	-3.96332	1.71231e-11	-3.84502	1.82071e-11	-0.377977	0.31732	-0.310127	0.998188
PFLU_3514	putative glutathione-S-transferase domain protein	0.011335	0.961673	-0.195611	0.331499	-0.366371	0.087893	-0.29062	0.170611	-0.377706	0.238331	-0.095009	0.998188
PFLU_6106	conserved hypothetical protein	0.573051	0.00343575	-0.535404	0.00595784	0.195765	0.291423	-0.550526	0.00674353	-0.377285	0.181096	-0.0151216	0.998391
PFLU_1169	putative membrane protein	-0.029918	0.9232	0.0115047	0.967139	-0.406996	0.178218	-0.132511	0.663758	-0.377078	0.378853	-0.144016	0.998188
PFLU_0628	dinF, DNA-damage-inducible protein F	0.185788	0.48898	-0.0111302	0.985401	-0.19123	0.514376	0.121862	0.672074	-0.377018	0.341235	0.132992	0.998188
PFLU_5239	pcnB, putative polynucleotide adenylyltransferase	1.05503	6.39669e-06	0.974281	1.31614e-05	0.678403	0.000682356	1.01128	1.02618e-05	-0.376623	0.168504	0.0369949	0.998188
PFLU_3848	conserved hypothetical protein	0.763373	0.0141417	0.450645	0.129276	0.38689	0.218092	0.543007	0.0837353	-0.376483	0.383346	0.0923617	0.998188
PFLU_4619	putative esterase/lipase	0.712549	0.00645196	0.208994	0.397922	0.336355	0.193686	0.156719	0.556259	-0.376194	0.294562	-0.0522746	0.998188
PFLU_0893	conserved hypothetical protein	3.45197	1.82113e-10	3.79647	3.24906e-11	3.07632	1.30218e-09	3.69149	6.26554e-11	-0.375652	0.197125	-0.104971	0.998188
PFLU_0207	putative transport-related membrane protein	0.156388	0.506159	0.870024	0.000596701	-0.219193	0.38378	0.715787	0.00453735	-0.37558	0.285962	-0.154237	0.998188
PFLU_2114	putative regulatory protein	0.472501	0.245636	0.758261	0.055585	0.0969556	0.841175	0.385397	0.384529	-0.375546	0.521437	-0.372865	0.998188
PFLU_1272	pyrH, uridylate kinase	0.807382	0.000124876	0.946627	1.98988e-05	0.431913	0.0178525	0.756569	0.000238412	-0.375469	0.174575	-0.190058	0.998188
PFLU_4281	putative integral membrane transport protein	-0.128305	0.600318	-0.307862	0.188959	-0.503658	0.0490158	-0.186078	0.455114	-0.375353	0.310219	0.121784	0.998188
PFLU_5575	putative exported organic solvent tolerance protein	1.49322	4.76388e-08	1.3093	1.87593e-07	1.11825	1.81663e-06	1.19538	6.46554e-07	-0.374974	0.156619	-0.113923	0.998188
PFLU_0888	putative ABC transport system, ATP-binding protein	1.47015	3.13431e-05	1.0677	0.000650145	1.09536	0.000688897	1.16909	0.000346901	-0.374787	0.350031	0.101391	0.998188
PFLU_1087	putative TonB-dependent receptor	-0.626012	0.00542805	-0.97491	0.000127594	-1.00068	0.000161617	-1.22629	2.22528e-05	-0.374669	0.265764	-0.251383	0.998188
PFLU_1819	sdhB, succinate dehydrogenase iron-sulfur protein	-0.294591	0.0723187	-0.064946	0.69027	-0.669188	0.000460855	-0.285642	0.0782557	-0.374597	0.164642	-0.220696	0.992665
PFLU_5829	serA, D-3-phosphoglycerate dehydrogenase	2.51429	5.6299e-10	2.76469	1.2608e-10	2.13975	4.91988e-09	2.65551	2.31916e-10	-0.374541	0.188657	-0.109179	0.998188
PFLU_1273	rrf, ribosome recycling factor	0.307582	0.0692835	0.345568	0.0399851	-0.0668166	0.707903	0.141192	0.403396	-0.374399	0.169244	-0.204375	0.998188
PFLU_5833	conserved hypothetical protein	0.871133	0.00142053	0.972279	0.000476177	0.496831	0.0585989	0.906247	0.00138499	-0.374302	0.288936	-0.0660317	0.998188
PFLU_2751	multidrug efflux system transmembrane protein	-0.627543	0.000442468	-0.461459	0.00455738	-1.00163	5.44598e-06	-0.674605	0.000292716	-0.374084	0.15458	-0.213146	0.992665
PFLU_6107	putative membrane protein	0.549267	0.0228723	-0.338477	0.159023	0.17529	0.487861	0.0889306	0.72864	-0.373977	0.285358	0.427408	0.883908
PFLU_0252	tauD, alpha-ketoglutarate-dependent taurine dioxygenase	0.256191	0.432272	0.94841	0.0041841	-0.117006	0.754132	0.945284	0.00624286	-0.373198	0.434901	-0.00312658	0.998705
PFLU_0353	putative membrane protein	-0.667037	0.0002605	-1.07608	1.34594e-06	-1.03993	3.54547e-06	-0.779447	7.13765e-05	-0.372891	0.156264	0.296633	0.86393
PFLU_5508	rplO, 50S ribosomal protein L15	2.51481	1.1717e-09	2.75643	2.68901e-10	2.14308	9.24047e-09	2.72457	3.54979e-10	-0.371727	0.224439	-0.0318618	0.998188
PFLU_2841	hypothetical protein	-0.262261	0.711506	-0.409474	0.548939	-0.633885	0.416412	-0.329568	0.671422	-0.371624	0.751934	0.0799054	0.998188
PFLU_4578	DNA polymerase III subunit Tau	1.70059	3.92232e-09	1.86496	8.52544e-10	1.32912	1.09718e-07	1.8145	1.46052e-09	-0.371467	0.138737	-0.0504595	0.998188
PFLU_5448	ppa, inorganic pyrophosphatase	0.42517	0.0244777	0.333193	0.0675718	0.0537765	0.786413	0.208494	0.254496	-0.371393	0.197823	-0.124699	0.998188
PFLU_0003	recF, DNA replication and repair protein RecF	1.35182	8.65129e-07	1.6171	7.05214e-08	0.981341	4.48954e-05	1.40814	5.4454e-07	-0.370476	0.183509	-0.208953	0.998188
PFLU_5171	rplU, putative 50S ribosomal protein L21	2.89602	2.90668e-11	3.25129	5.09326e-12	2.52577	1.74223e-10	3.17501	7.38353e-12	-0.370245	0.168504	-0.0762803	0.998188
PFLU_0573	putative membrane protein	-0.587543	0.000716429	-1.26949	1.46796e-07	-0.956969	6.5858e-06	-1.35629	9.33056e-08	-0.369426	0.152978	-0.0868007	0.998188
PFLU_3872	glutaminyl-tRNA synthetase	1.14633	3.11222e-07	1.11511	3.56188e-07	0.778378	3.33326e-05	1.10235	4.69093e-07	-0.36795	0.134336	-0.0127585	0.998391
PFLU_6091	putative ABC transport system, periplasmic protein	1.25246	1.33292e-05	0.872014	0.000522973	0.884573	0.000687097	0.520062	0.0295876	-0.367885	0.234418	-0.351952	0.923089
PFLU_0535	putative membrane protein	3.53234	5.56926e-12	3.76708	1.67633e-12	3.16531	1.92942e-11	3.69226	2.33071e-12	-0.367027	0.180644	-0.0748172	0.998188
PFLU_3830	NADH dehydrogenase I chain N	1.26684	2.88153e-07	0.664522	0.00031897	0.899923	1.90548e-05	0.655249	0.00041498	-0.366918	0.156264	-0.00927254	0.998391
PFLU_1186	putative phage-related hypothetical protein	0.213139	0.618374	0.627017	0.111662	-0.153775	0.749084	-0.129637	0.784485	-0.366914	0.555629	-0.756654	0.857835
PFLU_1647	putative bifunctional protein (prephenate dehydrogenase + 3-phosphoshikimate 1-carboxyvinyltransferase)	1.24211	8.84864e-08	1.11996	2.57598e-07	0.87542	7.71555e-06	1.11804	3.27456e-07	-0.366693	0.124292	-0.00192519	0.998705
PFLU_0681	conserved hypothetical protein	2.67569	1.59308e-06	2.77762	7.72857e-07	2.30907	1.69061e-05	2.83276	9.19094e-07	-0.366629	0.407666	0.0551359	0.998188
PFLU_5505	rpsM, 30S ribosomal protein S13	2.40652	5.51489e-11	2.51567	2.13059e-11	2.04075	4.9045e-10	2.47878	2.94438e-11	-0.365764	0.147077	-0.0368892	0.998188
PFLU_5511	rplR, 50S ribosomal protein L18	3.12934	7.40462e-10	3.36969	2.11706e-10	2.76422	3.96248e-09	3.33242	2.83104e-10	-0.365124	0.292413	-0.0372747	0.998188
PFLU_1259	dapE, succinyl-diaminopimelate desuccinylase	0.779775	0.000193704	0.842481	7.74332e-05	0.414753	0.0246878	0.69808	0.000603754	-0.365022	0.180411	-0.144401	0.998188
PFLU_2079	putative polysaccharide exported-related lipoprotein	-1.72045	3.60967e-09	-2.89646	5.69845e-12	-2.08509	5.32488e-10	-2.92205	9.80968e-12	-0.364645	0.16295	-0.0255892	0.998188
PFLU_0669	putative atrazine degradation related protein (amidohydrolase)	-0.0341273	0.894088	0.297385	0.193899	-0.397693	0.114277	0.298355	0.21364	-0.363565	0.318585	0.000970149	0.998705
PFLU_4949	pyruvate kinase	0.350057	0.108063	0.0337168	0.876475	-0.0126612	0.957016	-0.149413	0.491059	-0.362718	0.289074	-0.18313	0.998188
PFLU_4091	iron(III) dicitrate-binding periplasmic protein	1.31584	0.00123237	1.52657	0.000256152	0.953699	0.0190978	1.42849	0.00088829	-0.362146	0.435863	-0.0980792	0.998188
PFLU_0378	putative ABC transport system, ATP-binding protein	-0.0578809	0.833749	-0.371984	0.147075	-0.419954	0.125974	-0.682686	0.0190131	-0.362073	0.362636	-0.310701	0.998188
PFLU_1480	purC, phosphoribosylaminoimidazole-succinocarboxamide synthase	0.645754	5.06297e-05	0.598597	9.49708e-05	0.283716	0.0305006	0.460181	0.00119269	-0.362038	0.109954	-0.138416	0.998188
PFLU_4072	putative general secretion pathway protein M	-0.376048	0.575497	0.380063	0.524815	-0.738067	0.322655	-0.174115	0.809778	-0.36202	0.752685	-0.554177	0.998188
PFLU_5442	putative transport-related membrane protein	-0.774902	0.0208667	-0.953475	0.00559417	-1.13682	0.00188533	-0.239275	0.457442	-0.361915	0.478975	0.714201	0.728453
PFLU_4283	conserved hypothetical protein	0.545687	0.0153088	0.665101	0.00382658	0.183897	0.420608	0.690832	0.00388478	-0.36179	0.263725	0.0257306	0.998188
PFLU_5257	triosephosphate isomerase	1.65845	1.0613e-06	1.57243	1.65356e-06	1.29702	2.42962e-05	1.73728	6.18095e-07	-0.361435	0.278779	0.164856	0.998188
PFLU_0889	putative ABC transport system, membrane protein	-0.602755	0.00124786	-1.07716	3.4195e-06	-0.963486	2.06796e-05	-1.16881	2.37417e-06	-0.360731	0.183509	-0.0916525	0.998188
PFLU_5383	conserved hypothetical protein	-2.19302	4.46162e-06	-2.31312	2.10659e-06	-2.5535	1.46786e-06	-2.10908	9.11127e-06	-0.360478	0.53491	0.204038	0.998188
PFLU_4424	flagellar biosynthetic protein FliQ	-3.24014	1.6181e-09	-3.60049	3.86192e-10	-3.60059	1.07764e-09	-3.97779	3.74582e-10	-0.360458	0.441573	-0.377303	0.998188
PFLU_5811	putative cation ABC transport system, ATP-binding protein	-0.201354	0.435317	-0.20669	0.412085	-0.561578	0.047891	0.37613	0.145584	-0.360224	0.366338	0.58282	0.620136
PFLU_0377	putative ABC transport system, membrane protein	0.0819023	0.748089	-0.108169	0.6577	-0.278022	0.273527	-0.377309	0.138856	-0.359925	0.336459	-0.26914	0.998188
PFLU_5922	hypothetical protein	0.627002	0.129571	0.228134	0.589502	0.267426	0.564079	0.0237153	0.961924	-0.359575	0.55089	-0.204418	0.998188
PFLU_1154	pyrC, dihydroorotase	0.832883	0.000506377	0.572656	0.00814938	0.47339	0.0280058	0.450256	0.0337722	-0.359493	0.257365	-0.1224	0.998188
PFLU_3668	putative GDP-mannose 4,6-dehydratase	4.45977	1.53177e-05	2.89283	0.00323927	4.10033	7.45085e-05	1.65645	0.146015	-0.359445	0.608859	-1.23638	0.867981
PFLU_0918	putative membrane protein	1.3251	0.000399568	1.2175	0.000763206	0.96567	0.00617818	0.933903	0.00746173	-0.359426	0.435863	-0.283596	0.998188
PFLU_2571	putative two component sensor histidine kinase transcriptional regulator	-1.83124	1.64435e-07	-1.57083	7.95392e-07	-2.19036	3.38232e-08	-1.79753	2.75328e-07	-0.359117	0.323427	-0.226693	0.998188
PFLU_2461	putative membrane protein	-0.183636	0.729048	0.26719	0.578726	-0.542725	0.344203	0.685883	0.169873	-0.359089	0.659834	0.418693	0.998188
PFLU_1221	wspC, putative chemotaxis-related methyltransferase	-0.352373	0.0266511	-1.29157	1.77941e-07	-0.711369	0.000214875	-1.26938	4.35603e-07	-0.358996	0.164444	0.0221928	0.998188
PFLU_3346	putative modification methylase (pseudogene)	0.247724	0.691339	0.729884	0.189471	-0.110834	0.877857	0.80419	0.185054	-0.358558	0.690786	0.0743068	0.998188
PFLU_4534	putative ATP-binding component of ABC transporter	-0.078493	0.664417	-0.236469	0.168728	-0.4368	0.0192006	-0.242704	0.17049	-0.358307	0.193254	-0.00623482	0.998391
PFLU_5451	conserved hypothetical protein (pseudogene)	1.21444	8.89879e-05	0.822966	0.00293164	0.856311	0.0032783	1.04506	0.000591875	-0.358126	0.301342	0.222097	0.998188
PFLU_4650	putative membrane protein	1.09979	0.0230459	0.34876	0.479602	0.741825	0.145509	0.456955	0.391345	-0.357964	0.57829	0.108196	0.998188
PFLU_1596	hypothetical protein	-1.3844	4.65751e-05	-1.90404	1.49037e-06	-1.7423	9.17642e-06	-1.85005	5.89657e-06	-0.357896	0.435863	0.0539949	0.998188
PFLU_1291	eno1, enolase	1.82045	8.9063e-09	1.71428	1.37765e-08	1.4627	1.54115e-07	1.58235	4.2673e-08	-0.357745	0.183509	-0.131926	0.998188
PFLU_1816	sdhC, succinate dehydrogenase cytochrome b556 subunit	2.11896	6.65373e-10	2.3502	1.31229e-10	1.76155	8.33593e-09	2.1485	4.79651e-10	-0.357408	0.16295	-0.201701	0.998188
PFLU_5502	rpoA, DNA-directed RNA polymerase alpha chain	2.47534	5.87174e-11	2.55722	2.71964e-11	2.11815	4.60898e-10	2.46336	4.68388e-11	-0.357192	0.160496	-0.0938605	0.998188
PFLU_1139	gltI, glutamate/aspartate ABC transport system, periplasmic binding protein precursor	-2.02826	6.55756e-10	-2.20169	1.71751e-10	-2.38527	1.07279e-10	-2.39997	6.72866e-11	-0.357003	0.165973	-0.198286	0.998188
PFLU_5009	50S ribosomal subunit protein L19	2.16143	3.87675e-09	2.32269	1.09241e-09	1.80443	4.82367e-08	2.15754	3.45334e-09	-0.357	0.206311	-0.165144	0.998188
PFLU_2976	alkylated DNA repair protein	0.0334621	0.895363	0.0303719	0.896673	-0.323423	0.187414	0.00461878	0.986513	-0.356885	0.326159	-0.0257531	0.998188
PFLU_0970	putative fusaric acid resistance protein	0.667376	0.0399779	0.607637	0.0564732	0.310497	0.361747	0.18509	0.596699	-0.356879	0.437871	-0.422547	0.991584
PFLU_5691	dbpA, ATP-independent RNA helicase	1.40281	2.59605e-06	1.33483	3.88607e-06	1.04639	9.28628e-05	1.389	3.26573e-06	-0.356413	0.244829	0.0541735	0.998188
PFLU_0835	putative ATPase	0.768571	0.000560924	0.702032	0.00110718	0.412388	0.0419457	0.5792	0.00601803	-0.356183	0.223575	-0.122831	0.998188
PFLU_4042	putative pyridine nucleotide-disulphide oxidoreductase	-0.42485	0.080618	-1.14448	0.000105094	-0.78069	0.00347841	-0.902009	0.00104486	-0.355841	0.347243	0.242467	0.998188
PFLU_3145	protease inhibitor	0.0990807	0.654166	-0.273175	0.200514	-0.256607	0.259544	-0.644631	0.00992677	-0.355688	0.279503	-0.371456	0.94401
PFLU_2696	putative exported protein	-2.39578	1.8276e-09	-3.8946	5.09993e-12	-2.7508	4.22234e-10	-3.96302	4.79227e-12	-0.355029	0.250253	-0.0684242	0.998188
PFLU_5232	putative putative aminotransferase	1.09539	9.97426e-06	1.27608	1.34642e-06	0.740365	0.000677369	1.16503	5.28507e-06	-0.355021	0.201027	-0.111052	0.998188
PFLU_3765A	conserved hypothetical protein	-5.13927	1.67963e-13	-6.04755	7.12595e-14	-5.49396	1.6591e-13	-5.90419	1.0067e-13	-0.354685	0.198667	0.143366	0.998188
PFLU_2509A	conserved hypothetical protein	1.57216	0.000707643	1.30219	0.0034368	1.21791	0.00894007	1.17312	0.0122239	-0.354253	0.482434	-0.129065	0.998188
PFLU_4649	putative membrane protein	-1.25084	0.0125182	-1.7061	0.00187058	-1.60504	0.00582708	-1.19252	0.0289388	-0.354201	0.696581	0.51358	0.998188
PFLU_4755	arginine N-succinyltransferase	0.237137	0.0708031	-0.436422	0.00224716	-0.116377	0.386333	-0.539288	0.000508369	-0.353515	0.117788	-0.102866	0.998188
PFLU_1219	wspA, putative methyl-accepting chemotaxis protein	-0.634545	8.73355e-05	-1.24093	2.75513e-08	-0.988006	7.56816e-07	-1.43465	6.01356e-09	-0.353462	0.126043	-0.193717	0.990668
PFLU_4336	oxidase	1.00934	0.00181958	0.651904	0.0303032	0.656413	0.0394182	0.635385	0.0469615	-0.352926	0.378853	-0.0165195	0.998391
PFLU_0129	putative ABC transport system, permease	0.322411	0.164133	0.287533	0.207921	-0.0304962	0.908928	0.408041	0.0914869	-0.352907	0.313149	0.120508	0.998188
PFLU_5773	thiG, thiazole biosynthesis protein	2.37659	2.37735e-08	2.69704	3.13611e-09	2.02403	2.59988e-07	2.44751	1.56589e-08	-0.352561	0.28208	-0.249526	0.998188
PFLU_0319	putative membrane protein	-1.98719	1.06346e-08	-2.05986	5.07873e-09	-2.33962	3.46844e-09	-1.88539	3.52133e-08	-0.352433	0.293083	0.174472	0.998188
PFLU_0153	hypothetical protein	-0.281794	0.416003	0.283815	0.382716	-0.634164	0.0963365	0.179037	0.620015	-0.35237	0.520628	-0.104778	0.998188
PFLU_4758	acetylornithine/succinyldiaminopimelate aminotransferase	0.527738	0.00221709	0.513184	0.00247609	0.17577	0.264876	0.303101	0.0539536	-0.351968	0.168504	-0.210083	0.992665
PFLU_4599	family S13 unassigned peptidase	-0.0758406	0.627278	-0.575533	0.000737426	-0.427756	0.00857926	-0.639472	0.000372149	-0.351915	0.158032	-0.0639389	0.998188
PFLU_5512	rplF, 50S ribosomal protein L6	3.2698	6.53204e-11	3.55415	1.73136e-11	2.91794	2.83539e-10	3.46339	2.5757e-11	-0.351864	0.254615	-0.0907635	0.998188
PFLU_1556	topA, DNA topoisomerase I	-0.417439	0.0115251	-0.659462	0.000316892	-0.769249	9.26923e-05	-0.827744	3.65828e-05	-0.35181	0.173504	-0.168283	0.998188
PFLU_4614	putative membrane protein	-2.63339	9.80348e-11	-2.92621	1.9687e-11	-2.98512	2.84556e-11	-3.02015	1.7729e-11	-0.351734	0.204174	-0.093944	0.998188
PFLU_0463	rfaC, lipopolysaccharide heptosyltransferase-1	1.46255	7.19458e-06	1.29069	2.59417e-05	1.11084	0.000214037	1.32332	3.01693e-05	-0.351709	0.289667	0.0326256	0.998188
PFLU_5420	putative lipoprotein	1.17484	7.70928e-07	0.997551	4.45601e-06	0.823272	5.44791e-05	0.882583	2.19482e-05	-0.351564	0.167129	-0.114968	0.998188
PFLU_3389	hypothetical protein	-1.3315	4.04232e-06	-2.395	3.03096e-09	-1.68303	3.65568e-07	-2.32276	7.12497e-09	-0.351533	0.291775	0.0722391	0.998188
PFLU_5482	putative lipoprotein	1.84708	1.03183e-06	1.40747	2.32932e-05	1.49649	1.96213e-05	0.905132	0.00289319	-0.35059	0.312447	-0.502341	0.739959
PFLU_1718	putative LysR-family regulatory protein	0.070428	0.809661	0.0677095	0.807336	-0.279568	0.341989	0.0991201	0.735903	-0.349996	0.403765	0.0314105	0.998188
PFLU_4911	TolQ protein	-0.403487	0.015737	-0.948474	9.14592e-06	-0.753482	0.000146611	-1.02985	4.66816e-06	-0.349995	0.180411	-0.0813797	0.998188
PFLU_3658	putative extracellular polysaccharide biosynthesis protein	1.76532	1.08151e-06	1.15859	0.000113858	1.41534	1.91929e-05	0.887609	0.00188238	-0.349983	0.313149	-0.270984	0.998188
PFLU_2027	fklB, FKBP-type peptidyl-prolyl cis-trans isomerase	1.84543	1.67541e-08	1.34279	7.06522e-07	1.49557	2.74806e-07	1.32178	1.01192e-06	-0.349858	0.20911	-0.0210154	0.998188
PFLU_4567	conserved hypothetical protein	-0.755334	0.00264052	-0.779393	0.00187048	-1.10499	0.000158452	-0.941962	0.000629499	-0.349653	0.344523	-0.162569	0.998188
PFLU_5551	putative membrane protein	0.685411	0.000352675	-0.187152	0.247552	0.335778	0.0466217	-0.0546045	0.746709	-0.349633	0.180411	0.132548	0.998188
PFLU_6029	hypothetical protein	0.878793	0.0271675	0.269205	0.497155	0.529393	0.198409	0.793325	0.0533387	-0.3494	0.527657	0.52412	0.990668
PFLU_3146	metalloprotease	0.842682	0.00010272	0.429319	0.0179466	0.493847	0.00929751	0.461121	0.0132194	-0.348835	0.204174	0.0318026	0.998188
PFLU_5099	putative membrane protein	2.04309	7.52696e-05	1.30296	0.0050973	1.69446	0.000809971	0.775722	0.114376	-0.348629	0.486612	-0.527241	0.990972
PFLU_4423	flagellar biosynthetic protein FliR	-3.1607	4.68965e-10	-3.85684	4.43113e-11	-3.50914	3.02943e-10	-3.94476	8.83751e-11	-0.34844	0.402742	-0.0879222	0.998188
PFLU_0777	putative oxidoreductase	0.489286	0.0343597	0.555943	0.0165076	0.141242	0.555728	0.680556	0.00550671	-0.348044	0.313158	0.124612	0.998188
PFLU_0491	putative outer membrane protein	1.0093	3.16468e-06	1.01115	2.56891e-06	0.661303	0.000350709	0.967408	5.38642e-06	-0.347994	0.159726	-0.0437431	0.998188
PFLU_2832	phage protein	0.365356	0.0488643	0.0232399	0.89927	0.0174612	0.932737	-0.128397	0.498366	-0.347895	0.220283	-0.151636	0.998188
PFLU_3494	putative short-chain dehydrogenase	0.160473	0.614195	-0.244299	0.422595	-0.187085	0.562754	-0.451633	0.149479	-0.347558	0.469384	-0.207334	0.998188
PFLU_0920	hprA, glycerate dehydrogenase	0.454854	0.0378492	0.370054	0.0818954	0.107456	0.64107	0.191925	0.388498	-0.347398	0.288499	-0.178129	0.998188
PFLU_3360	putative exported protein	0.932448	0.00106323	0.597216	0.0213284	0.58511	0.0298067	0.419543	0.112158	-0.347338	0.345367	-0.177673	0.998188
PFLU_5095	putative chemotaxis two-component system, response regulator	-4.10198	2.5636e-12	-5.53265	1.98627e-13	-4.44903	2.01864e-12	-5.30646	4.13265e-13	-0.34705	0.285358	0.226193	0.998188
PFLU_5889	putative ABC transport system, ATP-binding protein	-1.24398	4.42059e-06	-1.39193	1.0059e-06	-1.59076	4.01985e-07	-1.4568	9.89598e-07	-0.346784	0.277607	-0.064873	0.998188
PFLU_2538	putative transport-related, membrane protein	0.62602	0.0174461	0.897956	0.00121641	0.279447	0.304913	0.768558	0.00630598	-0.346573	0.343216	-0.129398	0.998188
PFLU_6088	conserved hypothetical protein	1.52253	0.000145049	0.832238	0.0171827	1.17678	0.00213926	0.998292	0.00747522	-0.345743	0.44079	0.166054	0.998188
PFLU_6127	parA, putative chromosome partitioning protein	1.00632	1.63956e-05	1.16137	2.5806e-06	0.661167	0.0012725	1.0097	1.73991e-05	-0.345155	0.19754	-0.151674	0.998188
PFLU_1049	putative nucleoid-associated protein	1.86187	6.02919e-07	2.0702	1.20777e-07	1.51694	9.88385e-06	1.97093	3.1345e-07	-0.344927	0.312712	-0.099269	0.998188
PFLU_1021	conserved hypothetical protein	0.0138503	0.944392	-0.457054	0.011463	-0.331026	0.064708	-0.474611	0.0106088	-0.344876	0.209401	-0.0175563	0.998391
PFLU_0069	metI, D-methionine ABC transport system, permease	0.154248	0.421656	0.185072	0.322014	-0.19056	0.343026	0.232605	0.231467	-0.344808	0.240727	0.0475327	0.998188
PFLU_5997	putative lipoprotein	1.03273	1.67988e-06	1.2392	1.37446e-07	0.687926	0.000190512	1.11123	7.26911e-07	-0.3448	0.152409	-0.127969	0.998188
PFLU_2375	putative aldose 1-epimerase	0.925981	0.00114298	0.989961	0.000578023	0.581456	0.026142	0.837117	0.00244708	-0.344524	0.375956	-0.152845	0.998188
PFLU_3930	trigger factor	1.77668	6.01422e-09	1.73287	5.91138e-09	1.43248	9.94071e-08	1.58779	2.01745e-08	-0.344199	0.182305	-0.14508	0.998188
PFLU_1240	adk, adenylate kinase	0.25569	0.197134	0.0144619	0.942527	-0.088153	0.676078	-0.0558506	0.787124	-0.343843	0.265764	-0.0703126	0.998188
PFLU_1312	putative ATP-dependent DNA ligase	0.724699	0.00375105	0.700117	0.00433712	0.381234	0.108923	0.837399	0.00133844	-0.343465	0.323462	0.137282	0.998188
PFLU_1199	conserved hypothetical protein	1.29079	3.25243e-05	1.07497	0.000203965	0.947423	0.00107589	0.996629	0.000698901	-0.343371	0.301342	-0.0783363	0.998188
PFLU_5705	pgk, phosphoglycerate kinase	1.07972	2.86547e-06	1.05029	3.26392e-06	0.736379	0.000216298	1.05288	3.89004e-06	-0.343346	0.180411	0.002591	0.998705
PFLU_4528	conserved hypothetical protein	0.682753	0.0321517	0.964969	0.00338061	0.339599	0.310824	0.802745	0.016919	-0.343154	0.44056	-0.162223	0.998188
PFLU_1271	tsf, elongation factor	2.08138	6.55756e-10	2.33998	1.11636e-10	1.73856	7.01913e-09	2.16757	3.19495e-10	-0.34282	0.177614	-0.172419	0.998188
PFLU_2236	putative ABC transport system, ATP-binding protein	0.14501	0.799649	0.545091	0.283249	-0.197601	0.75839	0.877581	0.103536	-0.342611	0.678682	0.33249	0.998188
PFLU_1645	pheA, chorismate mutase/prephenate dehydratase	1.04832	2.47398e-05	0.772624	0.000456261	0.706141	0.00125618	0.57343	0.00564016	-0.342182	0.246051	-0.199194	0.998188
PFLU_2818	hypothetical protein	-0.639035	0.0412328	-1.23327	0.000698859	-0.981127	0.0065463	-1.13538	0.00303703	-0.342093	0.498645	0.0978948	0.998188
PFLU_0480	putative membrane protein	0.298822	0.0278139	0.193129	0.13912	-0.0431949	0.764938	0.125641	0.346449	-0.342017	0.133616	-0.0674887	0.998188
PFLU_3958	putative Sodium:sulfate symporter	-1.50266	0.000238053	-1.3758	0.000460966	-1.84458	6.38873e-05	-1.42496	0.000567194	-0.341922	0.56588	-0.0491561	0.998188
PFLU_6132	putative ferric siderophore receptor	-0.620773	0.00690375	-0.402934	0.0587499	-0.962574	0.000345438	-0.613655	0.00961978	-0.341801	0.326159	-0.210721	0.998188
PFLU_1549	putative lytic transglycosylase	0.415703	0.00392396	-0.00299005	0.982409	0.0743607	0.59357	-0.21105	0.117782	-0.341342	0.134191	-0.208059	0.981216
PFLU_2447	putative exported protein	1.14033	6.31531e-05	1.28112	1.43894e-05	0.799046	0.00239947	1.26604	2.48903e-05	-0.341284	0.293083	-0.0150822	0.998391
PFLU_4164	conserved hypothetical protein	0.766034	0.00126372	0.880447	0.000323352	0.424772	0.0578815	0.869694	0.000509497	-0.341262	0.275738	-0.0107532	0.998391
PFLU_1563	putative helicase	-0.665646	0.000246102	-0.947474	5.09249e-06	-1.00686	3.73959e-06	-1.08959	1.26222e-06	-0.341212	0.174575	-0.142113	0.998188
PFLU_1758	ccmA, cytochrome C biogenesis ATP-binding export protein	1.67646	0.000464536	1.62801	0.00054936	1.33534	0.00438516	1.76013	0.000362771	-0.341118	0.532807	0.132118	0.998188
PFLU_2046	putative exported protein	-1.14238	0.0284182	-1.11322	0.0298969	-1.48349	0.0130601	-1.23388	0.0337722	-0.341109	0.720583	-0.120668	0.998188
PFLU_1886	hypothetical protein	-1.20213	9.83358e-06	-2.27247	4.07834e-09	-1.54242	7.35628e-07	-2.1931	9.5056e-09	-0.340295	0.292134	0.0793666	0.998188
PFLU_1264	putative lysine biosynthesis-related protein	1.12209	1.85792e-05	1.39909	1.21198e-06	0.781883	0.000739748	1.20445	8.02864e-06	-0.340211	0.267567	-0.194645	0.998188
PFLU_5708	putative ArsR-family regulatory protein	0.308688	0.0634636	-0.272468	0.0957488	-0.0314317	0.861767	-0.2329	0.1626	-0.34012	0.188699	0.0395683	0.998188
PFLU_1601	conserved hypothetical chain length determinant protein	-0.856482	7.37064e-05	-1.8453	7.64614e-09	-1.1965	2.40317e-06	-1.7877	1.66996e-08	-0.34002	0.221527	0.0576016	0.998188
PFLU_5231	probable regulator for maltose metabolism	0.761821	0.00964464	0.581236	0.040052	0.422092	0.159605	0.884429	0.004741	-0.339729	0.383641	0.303194	0.998188
PFLU_5172	octaprenyl-diphosphate synthase	0.99475	1.51461e-05	0.915265	3.17999e-05	0.655043	0.00110252	0.7285	0.000390752	-0.339708	0.204174	-0.186765	0.998188
PFLU_1698	putative ABC transportsystem, ATP-binding protein	0.632896	0.0108603	0.4398	0.0621529	0.293597	0.230863	0.246334	0.313039	-0.3393	0.336521	-0.193466	0.998188
PFLU_0452	putP, sodium/proline symporter (proline permease)	0.113456	0.557779	0.057915	0.760406	-0.225449	0.246661	0.0810368	0.678644	-0.338905	0.249749	0.0231219	0.998188
PFLU_5748	putative sensor kinase/response regulatory fusion protein	0.134181	0.416003	-0.311129	0.0567382	-0.204564	0.218142	-0.3543	0.0352442	-0.338746	0.189757	-0.043171	0.998188
PFLU_1372	conserved hypothetical deacetylase	-0.837517	0.00353282	-1.19614	0.000173024	-1.17589	0.000365363	-1.12944	0.000520511	-0.338374	0.431198	0.0667039	0.998188
PFLU_0525	purA, adenylosuccinate synthetase	0.742321	6.99861e-05	0.414398	0.00831045	0.40399	0.0113891	0.322109	0.0354783	-0.338331	0.167129	-0.0922882	0.998188
PFLU_4845	ABC transport system, membrane permease	1.53276	1.73129e-07	0.437636	0.0205911	1.19461	4.19564e-06	0.466182	0.0165063	-0.338148	0.2253	0.0285458	0.998188
PFLU_1881	hypothetical protein	-0.752881	0.00055877	-1.647	1.0062e-07	-1.09078	1.91917e-05	-1.6573	1.52726e-07	-0.3379	0.262994	-0.0102977	0.998391
PFLU_1058	lepA, GTP-binding protein	0.10047	0.458392	0.0757211	0.569185	-0.237022	0.0818319	-0.0623887	0.646295	-0.337491	0.14148	-0.13811	0.998188
PFLU_3796	siroheme synthase	1.18957	2.19649e-07	1.20028	1.56347e-07	0.852407	1.46975e-05	1.13386	3.9907e-07	-0.337162	0.15433	-0.0664177	0.998188
PFLU_3794	putative glycosyl transferase family protein	0.303878	0.0584451	0.187519	0.230245	-0.0329089	0.851469	0.116966	0.473135	-0.336787	0.180411	-0.0705531	0.998188
PFLU_0813	putative amino acid ABC transport system, membrane protein	-0.725132	0.0308489	-0.378348	0.231019	-1.06186	0.00582708	-0.248095	0.466029	-0.336728	0.538753	0.130254	0.998188
PFLU_1608	putative fimbria-related protein precursor	-1.26622	0.00184091	-1.45573	0.000587016	-1.60292	0.000613272	-1.235	0.00425645	-0.336707	0.612163	0.22073	0.998188
PFLU_5513	rpsH, 30S ribosomal protein S8	3.63548	1.86386e-11	3.9706	4.86449e-12	3.29921	6.21352e-11	3.86199	7.13152e-12	-0.336271	0.273535	-0.108606	0.998188
PFLU_1704	aroG, phospho-2-dehydro-3-deoxyheptonate aldolase	1.91888	2.12196e-09	1.97542	1.0294e-09	1.58282	3.05341e-08	1.91511	1.85989e-09	-0.33606	0.17793	-0.0603068	0.998188
PFLU_0825	dppA2, dipeptide ABC transport system, substrate-binding protein	-1.6066	6.5593e-07	-1.86613	8.59628e-08	-1.94217	8.35179e-08	-1.95648	6.01506e-08	-0.33557	0.322275	-0.0903456	0.998188
PFLU_2285	putative muconate delta-isomerase	0.0536075	0.916609	0.263702	0.559523	-0.281496	0.596174	0.606084	0.19857	-0.335104	0.638774	0.342383	0.998188
PFLU_0952	ftsZ, cell division protein	-1.92955	3.35988e-08	-3.06779	9.52833e-11	-2.26453	5.2878e-09	-3.12111	8.57555e-11	-0.334976	0.288936	-0.0533172	0.998188
PFLU_1056	putative ABC transport system, membrane protein	0.209654	0.15697	-0.0336486	0.822446	-0.124974	0.413005	-0.261642	0.0826975	-0.334628	0.167298	-0.227993	0.989476
PFLU_1298	putative tRNA pseudouridine synthase D	1.05738	2.20354e-05	1.10538	1.10411e-05	0.723049	0.0012287	1.10485	1.58138e-05	-0.334328	0.23937	-0.000522895	0.998705
PFLU_5529	tufB, elongation factor TU	2.45484	2.38511e-10	2.70324	5.19705e-11	2.12073	1.6119e-09	2.66857	6.66493e-11	-0.334112	0.216614	-0.034669	0.998188
PFLU_2041	putative ABC transport system, substrate-binding protein	-0.512484	0.0718363	-0.196504	0.474986	-0.845908	0.00890747	-0.335781	0.252747	-0.333424	0.465743	-0.139277	0.998188
PFLU_3873	peptidyl-prolyl cis-trans isomerase B	1.62777	9.30252e-09	1.36961	6.44392e-08	1.29442	2.02721e-07	1.4702	3.02518e-08	-0.333359	0.17237	0.100596	0.998188
PFLU_5619	conserved hypothetical protein	0.917122	1.3936e-05	1.4665	3.24852e-08	0.584407	0.001551	1.3695	1.089e-07	-0.332715	0.174809	-0.0969975	0.998188
PFLU_5223	penicillin-binding protein	1.5534	4.1827e-08	1.44264	8.18057e-08	1.22084	1.05558e-06	1.32429	3.09074e-07	-0.332565	0.185665	-0.11835	0.998188
PFLU_5860	putative outer membrane protein	-3.68272	5.4458e-11	-3.89468	1.9687e-11	-4.01525	2.41376e-11	-3.97996	1.7863e-11	-0.332524	0.330293	-0.0852823	0.998188
PFLU_5758	pyrB, aspartate carbamoyltransferase	0.780922	0.00383211	0.488935	0.0498066	0.448408	0.0800492	0.263754	0.296848	-0.332514	0.375956	-0.225182	0.998188
PFLU_3014	conserved hypothetical protein	-1.36373	9.66372e-07	-2.4605	5.73827e-10	-1.69609	8.65472e-08	-2.60092	4.36616e-10	-0.332362	0.265764	-0.140424	0.998188
PFLU_0143	conserved hypothetical protein	-0.674786	0.000485908	-2.00607	1.5605e-09	-1.00713	1.00785e-05	-1.95348	3.1603e-09	-0.332341	0.212891	0.0525866	0.998188
PFLU_4041	putative oxidoreductase	-0.546166	0.00848675	-1.39962	1.09032e-06	-0.878415	0.000226587	-1.05199	3.30536e-05	-0.332249	0.285804	0.347629	0.922796
PFLU_0345	putative lipoprotein	1.29851	0.00662935	0.670096	0.149111	0.966331	0.0490209	1.03042	0.0374448	-0.33218	0.576855	0.360329	0.998188
PFLU_2944	putative ABC transporter, ATP-binding protein	-0.215447	0.393422	0.0533686	0.830723	-0.547348	0.0460663	0.186354	0.471271	-0.331901	0.395824	0.132985	0.998188
PFLU_4243	conserved hypothetical protein	-3.07333	1.23494e-07	-3.54319	2.40949e-08	-3.40502	9.77294e-08	-3.31486	1.32171e-07	-0.331691	0.629355	0.22833	0.998188
PFLU_6017	conserved hypothetical protein	1.90816	2.31115e-08	1.11774	1.39921e-05	1.57668	3.41952e-07	1.15913	1.28436e-05	-0.331483	0.240437	0.0413861	0.998188
PFLU_5176	methyl-accepting chemotaxis protein II	-3.4618	8.98063e-08	-4.14649	1.00331e-08	-3.79311	4.16823e-08	-4.41043	7.12e-09	-0.331313	0.588025	-0.263934	0.998188
PFLU_4976	putative HlyD-family secretion protein	-0.0846579	0.86521	0.0172379	0.96977	-0.415908	0.422141	0.247277	0.615536	-0.33125	0.651222	0.230039	0.998188
PFLU_1644	serC, phosphoserine aminotransferase	1.25719	2.75119e-07	1.04163	2.25923e-06	0.926171	1.24924e-05	0.907877	1.33609e-05	-0.331017	0.179522	-0.133758	0.998188
PFLU_2051	putative LysR-family regulatory protein	0.434193	0.17838	0.178733	0.582448	0.103243	0.777898	0.0685808	0.848696	-0.33095	0.490592	-0.110152	0.998188
PFLU_1748	putative glutathione-regulated potassium-efflux transport system, membrane protein	-0.790555	0.000847722	-1.40406	2.53156e-06	-1.12071	5.47424e-05	-1.17724	3.39271e-05	-0.330156	0.32893	0.226819	0.998188
PFLU_4155	ribose permease	-0.0807872	0.815692	-0.00673901	0.983143	-0.410658	0.230778	-0.483566	0.162469	-0.329871	0.514287	-0.476827	0.990668
PFLU_2963	putative membrane protein	3.61025	7.83476e-07	3.5117	1.00441e-06	3.28041	5.90017e-06	3.63786	1.06e-06	-0.329842	0.464133	0.126151	0.998188
PFLU_2589	hypothetical protein	-0.982437	0.000539464	-1.24648	5.20822e-05	-1.31192	6.53894e-05	-1.04365	0.000506575	-0.32948	0.415508	0.202836	0.998188
PFLU_0085	conserved GGDEF domain protein	3.76423	3.28803e-12	3.30303	8.47585e-12	3.43477	9.84254e-12	2.99867	3.15891e-11	-0.329456	0.208489	-0.304365	0.869376
PFLU_2599	putative membrane protein	0.951111	0.117011	1.7605	0.00343708	0.621727	0.355732	1.84352	0.00391506	-0.329385	0.690786	0.0830235	0.998188
PFLU_4637	para-aminobenzoate synthase component I	0.845741	0.000821015	1.01533	0.000127594	0.516412	0.0300292	0.938308	0.000400606	-0.329329	0.310219	-0.0770225	0.998188
PFLU_3549	conserved hypothetical protein	0.372353	0.148902	0.759873	0.00462208	0.0431921	0.921236	0.727501	0.00928945	-0.329161	0.383798	-0.0323716	0.998188
PFLU_0475	putative carbamoyltransferase	2.0332	8.54914e-10	2.34512	1.0136e-10	1.70413	9.64539e-09	2.2397	2.08764e-10	-0.329061	0.180411	-0.105427	0.998188
PFLU_4673	putative outer membrane protein	0.824654	0.000123263	0.783501	0.00018048	0.49569	0.0102628	0.657684	0.00124134	-0.328964	0.214506	-0.125817	0.998188
PFLU_4933	preprotein translocase, ATPase secretion component (General Secretory Pathway)	2.24444	9.60296e-11	2.47202	1.9958e-11	1.91583	8.36938e-10	2.28063	6.15586e-11	-0.328605	0.167129	-0.191385	0.998188
PFLU_5347	putative membrane protein	0.531445	0.0208886	0.643868	0.00599202	0.202898	0.384679	0.690487	0.00468528	-0.328547	0.324525	0.0466188	0.998188
PFLU_5159	D-erythro-7,8-dihydroneopterin tri P epimerase	1.06683	0.000672285	1.11355	0.00040374	0.73934	0.013466	0.978879	0.00183153	-0.327486	0.396306	-0.134675	0.998188
PFLU_3782	putative arsenate reductase	0.716536	0.00589859	0.788308	0.00267007	0.389573	0.124499	0.763921	0.00441973	-0.326963	0.362043	-0.0243866	0.998391
PFLU_2479	conserved hypothetical protein	0.341843	0.383774	0.372444	0.329903	0.0156574	0.971738	0.650383	0.108737	-0.326186	0.573233	0.277939	0.998188
PFLU_5576	putative chaperone	1.27235	1.13545e-07	0.929648	4.22144e-06	0.946857	4.7923e-06	0.804193	2.55708e-05	-0.325491	0.168504	-0.125455	0.998188
PFLU_2116	putative 6-pyruvoyl tetrahydrobiopterin synthase	0.674385	0.036241	1.02991	0.00210451	0.348908	0.321742	0.922358	0.00807871	-0.325478	0.460101	-0.107548	0.998188
PFLU_4999	single-stranded-DNA-specific exonuclease	0.654254	0.00015694	0.753891	3.07802e-05	0.328867	0.0295421	0.62432	0.000276656	-0.325388	0.1595	-0.129571	0.998188
PFLU_0449	conserved hypothetical protein	0.240837	0.352935	0.269805	0.286579	-0.0844102	0.773858	0.111776	0.68927	-0.325247	0.402756	-0.158029	0.998188
PFLU_3847	putative ABC transporter ATP-binding protein	-0.760531	0.00132422	-0.810861	0.000697195	-1.08572	7.78274e-05	-0.876801	0.000538188	-0.325191	0.336521	-0.06594	0.998188
PFLU_1299	surE, acid phosphatase	1.92798	6.17265e-07	2.16401	1.12888e-07	1.60328	7.28486e-06	2.00745	3.82768e-07	-0.324696	0.366338	-0.156556	0.998188
PFLU_6128	gidB, glucose inhibited division protein B methyltransferase	0.960431	5.81794e-05	1.2307	2.85495e-06	0.635896	0.00328343	1.14226	9.93953e-06	-0.324535	0.247089	-0.0884448	0.998188
PFLU_6135	rnpA, ribonuclease P protein component	2.80029	1.94742e-10	3.03926	4.73697e-11	2.47599	1.14257e-09	3.02225	5.94555e-11	-0.324301	0.242141	-0.0170046	0.998391
PFLU_5980	rpmB, 50S ribosomal protein L28	3.1608	1.94943e-10	3.65623	2.37484e-11	2.83696	8.48864e-10	3.56464	3.57758e-11	-0.32384	0.310294	-0.0915946	0.998188
PFLU_4703	3-oxoacyl-[acyl-carrier-protein] synthase II	0.464727	0.00286674	0.290989	0.0414844	0.141853	0.325794	0.202384	0.151873	-0.322874	0.167129	-0.0886048	0.998188
PFLU_1815	gltA, citrate synthase	0.65471	0.00113864	0.46393	0.0119575	0.332183	0.0674296	0.405723	0.0260821	-0.322528	0.249749	-0.0582071	0.998188
PFLU_3783	putative Trp repressor binding protein	0.555203	0.0184758	0.45121	0.0474352	0.232826	0.323438	0.272075	0.24231	-0.322377	0.345367	-0.179135	0.998188
PFLU_4712	putative hydrolase	1.55042	4.04232e-06	1.55687	3.18475e-06	1.22862	8.03616e-05	1.57319	4.07175e-06	-0.321801	0.336521	0.0163204	0.998391
PFLU_1574	putative lipoprotein releasing system, membrane protein	0.5703	0.00791354	0.399866	0.0488336	0.248534	0.2366	0.0144066	0.948476	-0.321766	0.292413	-0.385459	0.857835
PFLU_0406	putative penicillin-binding protein 1A	0.88714	0.000106022	0.799733	0.000256669	0.566286	0.00558177	0.771084	0.000429712	-0.320854	0.258682	-0.0286496	0.998188
PFLU_3109	conserved hypothetical protein	1.28231	0.000180523	1.64536	9.3687e-06	0.961622	0.00332567	1.48455	4.99847e-05	-0.32069	0.410188	-0.160811	0.998188
PFLU_0161	putative lipoprotein	1.04421	0.000768708	0.584502	0.0369455	0.723785	0.0159683	-0.0462094	0.885584	-0.320423	0.395824	-0.630712	0.703454
PFLU_4709	conserved hypothetical protein	2.66106	3.60401e-09	2.82777	1.20726e-09	2.34069	2.0164e-08	2.79013	1.64347e-09	-0.32037	0.345367	-0.0376347	0.998188
PFLU_0225	conserved hypothetical protein (pseudogene)	-1.74301	8.69475e-06	-1.54343	2.41277e-05	-2.06335	4.16489e-06	-1.72063	2.48688e-05	-0.320339	0.553027	-0.177207	0.998188
PFLU_0899	upp, uracil phosphoribosyltransferase	-1.0671	1.07461e-06	-1.96986	4.20735e-10	-1.38708	5.76795e-08	-2.02586	4.72545e-10	-0.319979	0.185035	-0.0560014	0.998188
PFLU_1903A	hypothetical protein	1.92271	7.11413e-05	2.34503	5.0409e-06	1.60291	0.000743329	2.39203	6.54041e-06	-0.319798	0.502743	0.0469952	0.998188
PFLU_2611	putative exported protein	-0.762858	0.0220115	-0.674869	0.0367038	-1.08255	0.00376578	-1.25255	0.00150786	-0.319691	0.550814	-0.577685	0.933597
PFLU_1068	putative membrane protein	1.3185	0.00211751	1.23047	0.00333555	0.998898	0.0205738	0.724887	0.0943244	-0.319597	0.536068	-0.50558	0.990668
PFLU_3424	putative nitrite reductase	4.21784	1.70393e-06	4.29107	1.08635e-06	3.8985	6.40017e-06	4.6203	4.74789e-07	-0.319341	0.624655	0.329232	0.998188
PFLU_4932	arginine biosynthesis bifunctional protein ArgJ	0.843534	4.82243e-05	0.649716	0.000541017	0.52423	0.00379619	0.428146	0.0133101	-0.319303	0.212025	-0.221569	0.992665
PFLU_3222	putative non-ribosomal peptide synthetase	-1.3284	4.99392e-06	-1.19598	1.28982e-05	-1.64763	8.10753e-07	-1.34736	7.07873e-06	-0.319238	0.362043	-0.151384	0.998188
PFLU_0523	putative phage-related protein	-0.239054	0.182665	-0.853583	9.72362e-05	-0.558228	0.00450026	-0.972859	2.8344e-05	-0.319174	0.259184	-0.119276	0.998188
PFLU_5247	putative membrane protein	-1.73982	3.14267e-09	-2.86354	5.64611e-12	-2.05888	4.83632e-10	-3.01786	3.90205e-12	-0.319063	0.188206	-0.154323	0.998188
PFLU_6073	putative regulatory protein	1.43285	9.43146e-08	1.35898	1.45172e-07	1.1138	2.98609e-06	1.20315	1.00973e-06	-0.319049	0.185951	-0.155829	0.998188
PFLU_2947	putative ABC transporter, periplasmic binding protein	-0.353411	0.152823	-0.276245	0.253558	-0.672377	0.0159623	-0.0254479	0.923857	-0.318966	0.414439	0.250797	0.998188
PFLU_2372	araF, L-arabinose ABC transport system, substrate-binding periplasmic protein	0.224212	0.451736	0.470999	0.104809	-0.0947393	0.76567	0.176361	0.552989	-0.318952	0.489702	-0.294638	0.998188
PFLU_0393	putative TetR-family regulatory protein	-0.480599	0.0174221	-1.10085	1.64114e-05	-0.799159	0.00057612	-1.12879	2.04722e-05	-0.31856	0.302778	-0.0279449	0.998188
PFLU_5879	putative ubiquinone biosynthesis-related protein	0.63596	0.000396613	0.572102	0.000903148	0.317469	0.0474233	0.272865	0.0830139	-0.318491	0.183509	-0.299237	0.820297
PFLU_0235	putative exported protein	0.537808	0.0597018	0.198237	0.48532	0.219338	0.474363	0.582298	0.0512551	-0.31847	0.436077	0.384062	0.990668
PFLU_1116	conserved hypothetical MutT/nudix domain protein	-0.108559	0.651478	-0.837573	0.00149535	-0.426357	0.0839552	-0.849712	0.00239821	-0.317797	0.375956	-0.0121384	0.998391
PFLU_2601	putative transmembrane protein	2.02718	0.00525947	2.65692	0.000410376	1.70938	0.0213259	1.78778	0.0166352	-0.317797	0.713717	-0.869139	0.926283
PFLU_0618	accB, biotin carboxyl carrier protein of acetyl-CoA carboxylase	-0.617879	0.00435256	-0.375666	0.0590726	-0.935623	0.000156766	-0.616739	0.00448326	-0.317743	0.316368	-0.241073	0.998188
PFLU_0524	putative ATP phosphoribosyltransferase regulatory subunit	0.705497	5.368e-05	0.48207	0.00162584	0.387857	0.00939488	0.536284	0.000758185	-0.31764	0.160496	0.0542136	0.998188
PFLU_1057	putative ABC transport system, membrane protein	0.462238	0.0110942	0.1833	0.283514	0.145097	0.418202	0.166856	0.341697	-0.317141	0.23937	-0.0164445	0.998391
PFLU_1175	putative phage tail fiber-related protein	-0.199807	0.275783	-0.126669	0.483482	-0.516796	0.0106328	-0.287542	0.128321	-0.316988	0.273018	-0.160874	0.998188
PFLU_2268	putative exported rhamnogalacturonase	-0.243467	0.434337	-0.188459	0.536851	-0.560427	0.0953351	-0.18719	0.572968	-0.316959	0.515563	0.00126918	0.998705
PFLU_1921	putative membrane protein	0.381122	0.428326	1.24371	0.00706786	0.0647498	0.909598	1.43396	0.00394049	-0.316372	0.648608	0.190251	0.998188
PFLU_4366	conserved hypothetical protein	-2.15865	6.36936e-06	-2.72095	4.84842e-07	-2.4747	2.82816e-06	-2.31401	5.19747e-06	-0.316057	0.606688	0.406943	0.998188
PFLU_1107	putative glutamate synthase	1.8499	8.8542e-09	2.10858	1.11581e-09	1.534	1.26925e-07	1.99449	2.98241e-09	-0.315895	0.216306	-0.114086	0.998188
PFLU_1222	wspD, putative chemotaxis-related protein	-0.595544	0.00536394	-1.3984	1.6462e-06	-0.911256	0.000249157	-1.41204	3.32538e-06	-0.315712	0.32274	-0.0136357	0.998391
PFLU_0086	putative membrane-bound N-acetylmuramoyl-L-alanine amidase	1.24209	3.92171e-05	1.04255	0.000205139	0.926399	0.000828822	0.835501	0.00187636	-0.315695	0.367223	-0.207052	0.998188
PFLU_5328	putative putative membrane protein	1.22277	0.000109364	1.5936	4.43737e-06	0.907209	0.00239421	1.44383	2.26133e-05	-0.315558	0.378918	-0.149772	0.998188
PFLU_1783	phnI, phosphorous compounds metabolism-related protein	-0.0552743	0.939223	-0.108445	0.866881	-0.370802	0.614662	0.621882	0.336582	-0.315528	0.769368	0.730326	0.998188
PFLU_5043	GMP synthase (glutamine-hydrolyzing)	1.61259	2.6599e-09	1.88433	2.49836e-10	1.29708	5.31355e-08	1.7757	6.64823e-10	-0.315513	0.156299	-0.108629	0.998188
PFLU_5399	conserved hypothetical protein	1.053	1.80372e-05	1.0207	2.13151e-05	0.737584	0.0008171	0.896383	0.000120781	-0.31542	0.254615	-0.124314	0.998188
PFLU_5218	ketol-acid reductoisomerase	2.24777	1.26438e-10	1.94282	5.32485e-10	1.93245	9.72263e-10	1.85006	1.12824e-09	-0.315321	0.183509	-0.0927528	0.998188
PFLU_5532	rpsL, 30S ribosomal protein S12	2.82284	5.35016e-11	3.28362	6.39436e-12	2.50805	2.5463e-10	3.24803	7.82165e-12	-0.314793	0.240945	-0.0355952	0.998188
PFLU_5276	smpB, SsrA-binding protein	1.82527	4.07776e-07	1.93404	1.54268e-07	1.51085	5.43405e-06	1.97605	1.51884e-07	-0.314414	0.339913	0.0420072	0.998188
PFLU_0297	putative dehydrogenase (pseudogene)	3.13836	0.000420324	3.5103	8.41249e-05	2.8244	0.00208592	3.16491	0.000590588	-0.313955	0.672321	-0.345387	0.998188
PFLU_4912	putative thioesterase	-0.477405	0.00631633	-0.790905	8.08587e-05	-0.790684	0.000118086	-0.717707	0.00026917	-0.313279	0.230594	0.0731978	0.998188
PFLU_5925	putative ABC transport system, ATP-binding protein	1.04489	1.54837e-05	0.829879	0.000153941	0.731678	0.000686696	0.663016	0.00148224	-0.31321	0.255118	-0.166863	0.998188
PFLU_6074	putative sensory box/GGDEF family protein	1.13142	3.89192e-06	1.4013	2.15399e-07	0.818446	0.000194279	1.48705	1.39919e-07	-0.31297	0.221728	0.0857479	0.998188
PFLU_1375	putative porin precursor-like membrane protein	-0.588264	0.0386129	-0.837805	0.00515441	-0.901126	0.00527511	-0.714746	0.0204016	-0.312862	0.489702	0.123059	0.998188
PFLU_1347	conserved hypothetical protein	0.483763	0.0687033	0.620141	0.0201458	0.171186	0.549196	0.692488	0.0140774	-0.312577	0.419096	0.072347	0.998188
PFLU_4209	aromatic-amino-acid aminotransferase	-0.387061	0.0127154	-0.801867	2.35893e-05	-0.699605	0.000129321	-1.00053	2.18863e-06	-0.312545	0.186807	-0.198659	0.998188
PFLU_5780	ftsY, cell division protein	1.77334	3.53261e-09	1.86067	1.34041e-09	1.46098	5.35684e-08	1.71638	4.98018e-09	-0.312361	0.183509	-0.144286	0.998188
PFLU_0924	putative exported protein	-2.40478	3.0738e-07	-3.05495	1.52289e-08	-2.71713	8.68672e-08	-2.93684	2.72535e-08	-0.312353	0.500041	0.118111	0.998188
PFLU_5979	rpmG, 50S ribosomal protein L33	2.77702	1.25985e-08	3.28791	8.36405e-10	2.46502	8.80562e-08	3.27617	1.17503e-09	-0.312	0.350031	-0.0117426	0.998391
PFLU_1285	dnaE, DNA polymerase III alpha subunit	0.743494	1.68921e-05	0.892063	1.70381e-06	0.432336	0.00300583	0.827337	4.72082e-06	-0.311158	0.15433	-0.0647257	0.998188
PFLU_4545	hypothetical protein	-0.137027	0.610712	-0.686817	0.0121496	-0.44808	0.101976	-0.70945	0.0143591	-0.311053	0.441681	-0.0226328	0.998391
PFLU_1516	putative ribonuclease	0.0190358	0.908115	-0.432921	0.00674187	-0.291891	0.0615399	-0.544992	0.00153559	-0.310927	0.193254	-0.112071	0.998188
PFLU_3521	putative membrane protein	-0.521072	0.00914005	-1.52745	2.54105e-07	-0.83176	0.000278799	-1.36019	1.40784e-06	-0.310688	0.298883	0.167264	0.998188
PFLU_3698	putative TonB-dependent outer membrane receptor protein	-1.12012	0.000642119	-0.336549	0.209029	-1.43036	0.000162703	-0.707143	0.0216195	-0.310242	0.531176	-0.370594	0.998188
PFLU_1577	putative exported protein	6.75076	1.27157e-13	6.83104	7.12595e-14	6.44068	1.6591e-13	6.47207	1.01606e-13	-0.310078	0.289612	-0.358974	0.856365
PFLU_0322	conserved hypothetical protein	0.621023	0.0167819	0.710158	0.00674187	0.311088	0.231991	0.626523	0.0183552	-0.309935	0.402756	-0.0836355	0.998188
PFLU_0004	gyrB, DNA gyrase subunit B	0.94812	1.94366e-05	1.03237	6.17997e-06	0.63826	0.00102191	0.955582	1.68467e-05	-0.30986	0.241008	-0.0767878	0.998188
PFLU_6110	putative phosphatidate cytidylyltransferase	-1.27917	2.98528e-07	-2.22055	2.8263e-10	-1.58892	3.38232e-08	-1.95187	2.65265e-09	-0.309742	0.240727	0.268682	0.990668
PFLU_0624	conserved hypothetical protein	0.645847	0.00408919	0.144533	0.488382	0.336483	0.120965	0.267853	0.213782	-0.309364	0.319116	0.12332	0.998188
PFLU_0811	putative ornithine decarboxylase	0.225568	0.215096	0.0250529	0.890531	-0.0823132	0.665598	-0.0726515	0.694207	-0.307882	0.284923	-0.0977045	0.998188
PFLU_1174	putative phage tail-related protein	0.379273	0.328067	0.478097	0.206567	0.0716429	0.872388	-0.181775	0.679272	-0.30763	0.599827	-0.659871	0.922796
PFLU_5627	putative RNA polymerase sigma factor	-1.02182	0.000497198	0.172526	0.468324	-1.32942	8.85876e-05	-0.172911	0.497247	-0.307601	0.470142	-0.345436	0.990668
PFLU_0310	conserved hypothetical protein	1.07354	0.000309172	1.05119	0.000334411	0.766272	0.00723374	0.962626	0.00121796	-0.307264	0.378918	-0.0885662	0.998188
PFLU_0374	mdoH, glucans biosynthesis glucosyltransferase H	0.694349	0.000106218	0.289202	0.0480394	0.38712	0.0124595	0.207856	0.152409	-0.30723	0.184335	-0.0813455	0.998188
PFLU_5501	rplQ, 50S ribosomal protein L17	2.32104	6.99144e-11	2.45254	2.43581e-11	2.01433	4.75644e-10	2.33192	5.04058e-11	-0.306713	0.186892	-0.120626	0.998188
PFLU_2186	putative acetyltransferase	0.796222	0.00551822	1.11036	0.000305903	0.489511	0.0855826	0.987486	0.00132199	-0.306711	0.424282	-0.122876	0.998188
PFLU_6099	conserved hypothetical protein	0.326892	0.240712	-0.339946	0.230347	0.0203114	0.948393	-0.370191	0.226631	-0.30658	0.463888	-0.0302451	0.998391
PFLU_5468	thiL, thiamine-monophosphate kinase	1.05272	2.75238e-05	1.15586	7.79038e-06	0.746293	0.00111074	1.11675	1.76563e-05	-0.306425	0.276909	-0.039111	0.998188
PFLU_0620	putative methyl-accepting chemotaxis protein	-0.0753503	0.786126	0.0496065	0.85024	-0.381759	0.17952	-0.120036	0.675633	-0.306408	0.446489	-0.169642	0.998188
PFLU_1201	conserved hypothetical protein	0.124954	0.424165	0.122978	0.420948	-0.181384	0.258102	-0.0522293	0.747826	-0.306338	0.204812	-0.175207	0.998188
PFLU_5533	rpoC, DNA-directed RNA polymerase beta chain	1.83197	3.11382e-09	1.93937	1.08125e-09	1.52565	3.40693e-08	1.87413	1.82223e-09	-0.306328	0.220366	-0.0652428	0.998188
PFLU_4468	ATP-dependent DNA helicase	-0.137924	0.3588	-0.189728	0.196605	-0.443728	0.00667755	-0.271893	0.0742066	-0.305804	0.197009	-0.0821651	0.998188
PFLU_0462	rfaF, ADP-heptose--LPS heptosyltransferase II	0.660197	0.000676275	0.777491	0.000128059	0.354749	0.0445663	0.605978	0.00151788	-0.305448	0.240727	-0.171512	0.998188
PFLU_3006	putative membrane protein	-0.669435	0.0783643	0.0722021	0.840333	-0.974259	0.0248495	-0.344521	0.388923	-0.304824	0.637773	-0.416723	0.998188
PFLU_0861	gatA, glutamyl-tRNA(Gln) amidotransferase subunit A	1.37343	7.39316e-08	1.5171	1.51775e-08	1.06866	1.90952e-06	1.37397	6.45045e-08	-0.304772	0.197125	-0.143134	0.998188
PFLU_1289	pyrG, CTP synthase	0.766433	3.32139e-05	0.693209	8.13395e-05	0.461742	0.00351805	0.66069	0.000143102	-0.304691	0.183509	-0.0325192	0.998188
PFLU_2922	putative membrane protein	-1.74853	1.33905e-08	-1.77609	8.11132e-09	-2.05317	3.5249e-09	-2.18348	1.54411e-09	-0.304644	0.291775	-0.407391	0.739959
PFLU_1275	cdsA, phosphatidate cytidylyltransferase	1.05256	0.0388697	1.13507	0.024461	0.74802	0.163831	0.923395	0.0844339	-0.304537	0.657231	-0.211679	0.998188
PFLU_5548	argC, N-acetyl-gamma-glutamyl-phosphate reductase	2.05983	5.52265e-09	2.48386	3.68051e-10	1.75554	4.99113e-08	2.33176	9.63299e-10	-0.304292	0.276019	-0.152099	0.998188
PFLU_3667	GDP-fucose synthetase	0.990813	0.0181329	-0.137352	0.753503	0.686639	0.109609	-0.704598	0.156437	-0.304174	0.594967	-0.567246	0.998188
PFLU_5507	secY, preprotein translocase SecY subunit	2.21014	2.67987e-09	2.49542	4.38591e-10	1.90608	1.82537e-08	2.517	4.39164e-10	-0.30406	0.296956	0.0215846	0.998188
PFLU_5709	metK, S-adenosylmethionine synthetase	0.111674	0.41077	-0.560068	0.000338191	-0.192374	0.157264	-0.61459	0.00015761	-0.304047	0.168258	-0.0545218	0.998188
PFLU_0789	coaE, dephospho-CoA kinase	0.00722953	0.982996	0.268556	0.304204	-0.296714	0.279518	0.238744	0.373735	-0.303943	0.46599	-0.0298122	0.998188
PFLU_5754	conserved hypothetical protein	1.10853	6.01595e-05	1.33159	6.08171e-06	0.804915	0.00183094	1.30838	1.21209e-05	-0.303613	0.327721	-0.023217	0.998296
PFLU_0111	pntB, NAD(P) transhydrogenase subunit beta	0.926017	2.5709e-06	0.927695	2.06828e-06	0.622996	0.000235834	0.987403	1.22627e-06	-0.303022	0.168504	0.0597081	0.998188
PFLU_5384	putative exonuclease	1.3294	6.74353e-05	1.44215	2.2666e-05	1.02669	0.00121988	1.39878	5.13274e-05	-0.302707	0.407128	-0.0433715	0.998188
PFLU_5058	putative DNA-binding protein	0.580947	0.000204546	0.361699	0.0083333	0.278661	0.0404051	0.375129	0.00746173	-0.302287	0.158032	0.0134305	0.998391
PFLU_4219	putative cobalamin-binding component of ABC transporter	0.125103	0.721058	0.326015	0.31608	-0.176964	0.630188	0.270684	0.437499	-0.302067	0.557658	-0.0553313	0.998188
PFLU_4634	conserved hypothetical protein	1.64068	9.68295e-06	1.72795	4.22144e-06	1.33877	0.000146629	1.96915	1.22222e-06	-0.301906	0.403765	0.241197	0.998188
PFLU_2591	conserved hypothetical protein	2.61995	9.45015e-08	2.35416	3.26788e-07	2.31903	7.02413e-07	2.51321	1.9661e-07	-0.300916	0.409522	0.159057	0.998188
PFLU_4128D	putative phage excisionase	-0.966016	3.01578e-05	-1.6607	4.50163e-08	-1.26679	1.89258e-06	-1.58177	1.16209e-07	-0.300778	0.295633	0.0789288	0.998188
PFLU_4163	DNA-specific endonuclease I	1.63202	2.10424e-06	1.68043	1.17023e-06	1.33185	4.07614e-05	1.47886	1.1314e-05	-0.300163	0.335187	-0.201572	0.998188
PFLU_5995	spoT, guanosine-3,5-bis(diphosphate) 3-pyrophosphohydrolase	1.59564	5.95659e-08	1.96234	3.13603e-09	1.29579	8.54912e-07	1.85109	7.40293e-09	-0.299855	0.265764	-0.111255	0.998188
PFLU_3373	putative glycosyl transferase	-0.032705	0.873209	-0.432765	0.0247443	-0.332037	0.089123	-0.143975	0.455485	-0.299332	0.309686	0.288789	0.990668
PFLU_4066	ABC transporter, substrate binding protein	-0.856891	0.0253551	-0.998978	0.0106863	-1.15601	0.00830053	-0.301198	0.435885	-0.299118	0.643041	0.69778	0.869376
PFLU_5757	pyrR, bifunctional protein [pyrimidine operon regulatory protein; uracil phosphoribosyltransferase]	0.584146	0.0416621	0.0662757	0.819335	0.285048	0.337743	-0.0457617	0.884724	-0.299098	0.471193	-0.112037	0.998188
PFLU_4706	malonyl CoA-acyl carrier protein transacylase	-0.00294683	0.99054	0.167694	0.40483	-0.301792	0.145262	-0.129412	0.528814	-0.298845	0.347872	-0.297105	0.990668
PFLU_3823	NADH dehydrogenase I chain G	0.762705	2.00111e-05	0.459027	0.00211442	0.463869	0.0022977	0.434019	0.0034266	-0.298836	0.177614	-0.0250072	0.998188
PFLU_0816	prfC, peptide chain release factor 3	0.75809	0.000854411	0.773508	0.000643339	0.459462	0.030181	0.736913	0.0012709	-0.298627	0.31727	-0.0365956	0.998188
PFLU_3628	putative acetyltransferase	0.890698	0.000889757	1.0516	0.000165197	0.59213	0.0203926	0.953495	0.000608913	-0.298568	0.37974	-0.0981048	0.998188
PFLU_0637	putative two-component system, sensor kinase	-2.57975	1.14525e-11	-4.58073	7.12595e-14	-2.87826	4.45645e-12	-4.23171	1.29089e-13	-0.298508	0.189793	0.349019	0.703454
PFLU_2919	conserved hypothetical protein	-3.60864	1.07234e-12	-3.30465	1.08249e-12	-3.90706	7.83092e-13	-3.44129	1.26719e-12	-0.298416	0.265944	-0.136641	0.998188
PFLU_0082	cycA, cytochrome c4 precursor	-0.21247	0.12698	-0.337878	0.0176381	-0.510843	0.00121944	-0.388835	0.00805256	-0.298373	0.182682	-0.0509562	0.998188
PFLU_4339	conserved hypothetical protein	0.992394	4.21811e-05	0.978381	4.15946e-05	0.69414	0.00161576	0.850887	0.000247739	-0.298254	0.290111	-0.127495	0.998188
PFLU_5059	putative fimbrial biogenesis protein	0.616137	0.000625874	0.643389	0.000375109	0.317958	0.0512001	0.555456	0.00164745	-0.298179	0.217367	-0.0879331	0.998188
PFLU_5593	putative signalling GGDEF/EAL domains containing conserved protein	-1.39551	1.01673e-07	-2.57746	3.85941e-11	-1.6934	1.04679e-08	-2.59111	4.4828e-11	-0.297886	0.241619	-0.0136522	0.998391
PFLU_0942	murE, UDP-N-acetylmuramoylalanyl-D-glutamate--2,6-dia mi nopimelate ligase	-1.23221	1.04159e-05	-2.06748	1.83693e-08	-1.53004	1.05558e-06	-2.32077	5.81593e-09	-0.29783	0.362715	-0.253299	0.998188
PFLU_1849	putative two-component system, sensor kinase	-0.659391	0.000362105	-0.942307	7.91139e-06	-0.957119	1.02316e-05	-1.17272	8.86881e-07	-0.297728	0.23937	-0.230408	0.990668
PFLU_0653	conserved hypothetical protein	-0.46191	0.0444285	-0.912547	0.000475022	-0.759019	0.00278496	-0.54801	0.0205182	-0.297109	0.403765	0.364537	0.967166
PFLU_5517	rplN, 50S ribosomal protein L14	2.24691	6.20804e-10	2.28113	3.63611e-10	1.94991	4.1776e-09	2.25787	4.73414e-10	-0.296996	0.25508	-0.0232577	0.998188
PFLU_4406	conserved hypothetical protein	-3.72062	3.1689e-11	-4.6886	2.25436e-12	-4.01706	1.99838e-11	-4.64864	4.0596e-12	-0.296437	0.410076	0.0399581	0.998188
PFLU_1055	pepA, cytosol aminopeptidase	1.59306	4.92147e-07	2.00303	2.27253e-08	1.29665	6.11145e-06	1.84376	7.04331e-08	-0.296405	0.347243	-0.159267	0.998188
PFLU_1156	argG, argininosuccinate synthase	1.61984	1.84929e-08	1.55454	2.33762e-08	1.32346	2.64513e-07	1.48581	4.63723e-08	-0.296377	0.239643	-0.0687331	0.998188
PFLU_3042	putative glycosyl transferase	-3.94869	8.40374e-12	-4.80629	8.51448e-13	-4.2449	5.46583e-12	-4.92693	9.61759e-13	-0.296213	0.352792	-0.120639	0.998188
PFLU_0742	putative exported protein	1.17467	0.000955154	1.81128	1.12638e-05	0.878999	0.00923603	2.15861	1.7431e-06	-0.295671	0.532652	0.347334	0.998188
PFLU_2253	conserved hypothetical protein	0.596682	0.0080744	0.761028	0.00119503	0.301068	0.173244	0.593586	0.00978801	-0.295614	0.348013	-0.167442	0.998188
PFLU_1044	putative membrane protein	-0.929239	0.00141281	-0.424399	0.0904647	-1.22449	0.000242825	-0.597936	0.0301223	-0.295247	0.494601	-0.173537	0.998188
PFLU_1054	putative DNA polymerase III chi subunit	1.32514	2.59739e-06	1.47941	5.18754e-07	1.03029	7.17838e-05	1.3007	4.35906e-06	-0.294844	0.289074	-0.178706	0.998188
PFLU_2924	putative membrane protein	-0.584559	0.0874468	-0.54526	0.103355	-0.879136	0.0222563	-0.425671	0.237466	-0.294577	0.606718	0.119589	0.998188
PFLU_1852	putative dehydrogenase	-0.46919	0.0447745	-0.228246	0.311966	-0.763682	0.00283688	-0.49576	0.0344185	-0.294492	0.415138	-0.267513	0.998188
PFLU_0945	murD, UDP-N-acetylmuramoylalanine--D-glutamate ligase	-1.47367	1.82695e-07	-2.21231	9.10706e-10	-1.76788	2.40158e-08	-2.46163	3.45718e-10	-0.294212	0.295972	-0.249313	0.992665
PFLU_0325	putative membrane protein	-0.770417	0.000481139	-1.63788	1.06173e-07	-1.06447	2.29166e-05	-1.69945	8.46254e-08	-0.29405	0.326159	-0.0615652	0.998188
PFLU_4040	putative acetylornithine deacetylase	-0.684636	0.000513822	-1.14887	2.01543e-06	-0.977907	1.88506e-05	-0.877472	5.17527e-05	-0.293271	0.279503	0.271395	0.978556
PFLU_5254	transcription termination factor	2.19656	2.75786e-09	2.4992	4.01778e-10	1.90359	1.8425e-08	2.31291	1.1734e-09	-0.292966	0.307487	-0.186291	0.998188
PFLU_4946	putative transmembrane protein	-0.604989	0.0026607	-1.08808	9.37918e-06	-0.897924	0.000114255	-1.13163	9.86725e-06	-0.292935	0.317071	-0.0435476	0.998188
PFLU_0950	putative cell division protein	-1.41168	1.92615e-07	-2.06264	1.35219e-09	-1.70452	2.51936e-08	-2.23559	7.74725e-10	-0.292835	0.285962	-0.172951	0.998188
PFLU_1379	acrB, acriflavine resistance protein B	0.1554	0.456236	-0.32187	0.113253	-0.13688	0.518245	-0.689408	0.0023148	-0.29228	0.365036	-0.367537	0.904366
PFLU_4711	putative peptidase	0.989398	0.000118685	1.01407	8.01306e-05	0.697214	0.0031137	1.00472	0.000111511	-0.292183	0.350031	-0.00934886	0.998391
PFLU_0456	conserved hypothetical protein	0.898049	2.6705e-05	1.38083	1.22104e-07	0.605903	0.00144282	1.18729	1.06983e-06	-0.292146	0.242678	-0.193537	0.998188
PFLU_5876	putative iron (III) ABC transport system, substrate-binding protein	-0.587677	0.0214408	-0.436442	0.0737585	-0.879654	0.00204538	-0.776831	0.00487739	-0.291977	0.45986	-0.340389	0.992665
PFLU_0447	putative methy-accepting chemotaxis protein	-1.77827	2.83711e-06	-1.80843	1.94782e-06	-2.06973	7.17008e-07	-2.29779	1.92538e-07	-0.291468	0.502308	-0.489358	0.922796
PFLU_1223	wspE, putative chemotaxis-related two-component system, sensor kinase	-0.889912	4.61664e-05	-1.76853	1.1673e-08	-1.18107	2.57888e-06	-1.84774	1.06744e-08	-0.29116	0.290111	-0.0792099	0.998188
PFLU_6003	recG, ATP-dependent DNA helicase	-0.0996032	0.5313	-0.221068	0.150415	-0.390727	0.018218	-0.319717	0.0462061	-0.291124	0.238733	-0.0986488	0.998188
PFLU_0045	putative lipoprotein	0.443328	0.0134081	0.303559	0.0748916	0.152419	0.396151	0.274103	0.120487	-0.29091	0.263914	-0.0294558	0.998188
PFLU_5712	putative exported protein	1.22826	3.81919e-07	1.60636	8.62217e-09	0.937535	1.35673e-05	1.39791	7.76503e-08	-0.290722	0.209784	-0.208448	0.990668
PFLU_1619	putative decarboxylase	0.714955	0.00113598	0.54798	0.00741722	0.424526	0.0364418	0.310746	0.11498	-0.290429	0.328378	-0.237234	0.998188
PFLU_3824	NADH-quinone oxidoreductase chain H	1.2247	2.01932e-07	0.883308	8.548e-06	0.934351	6.44456e-06	0.639749	0.000316613	-0.290345	0.204174	-0.243559	0.932738
PFLU_3778	probable D-lactate dehydrogenase	-0.369234	0.0612273	-0.74016	0.000843669	-0.659365	0.00309695	-0.596014	0.00618531	-0.290131	0.345367	0.144145	0.998188
PFLU_1300	pcm, protein-L-isoaspartate O-methyltransferase	1.59046	1.56124e-07	1.59098	1.21727e-07	1.30037	2.7125e-06	1.56047	2.20453e-07	-0.290094	0.280896	-0.0305055	0.998188
PFLU_2394	putative transport-related membrane protein	-3.16936	2.60692e-09	-2.95604	3.90619e-09	-3.45932	2.21827e-09	-3.04786	6.6663e-09	-0.289957	0.563281	-0.0918108	0.998188
PFLU_5072	inositol monophosphatase	1.19116	1.11107e-06	1.57475	2.63687e-08	0.901316	3.15428e-05	1.56963	3.14322e-08	-0.289847	0.25508	-0.00512431	0.998391
PFLU_0487	conserved hypothetical protein	1.68396	8.74097e-08	2.09698	3.59367e-09	1.39453	1.20094e-06	2.03857	6.70613e-09	-0.289433	0.295364	-0.0584085	0.998188
PFLU_4881	probable intracellular septation protein	1.01499	1.28196e-05	0.965348	1.88531e-05	0.725598	0.00052855	1.06594	8.37876e-06	-0.289396	0.264053	0.10059	0.998188
PFLU_1402	putative membrane protein	-0.248153	0.072461	-0.658016	8.84864e-05	-0.53738	0.000847203	-0.525911	0.000978247	-0.289227	0.185915	0.132105	0.998188
PFLU_1344	livM1, high-affinity branched-chain amino acid ABC transport system, permease	0.755699	0.000114494	0.570717	0.0013288	0.466509	0.00749377	0.535109	0.00266641	-0.289189	0.240911	-0.0356083	0.998188
PFLU_0829	putative two-component system, sensor kinase	0.0999779	0.602767	-0.220926	0.231616	-0.188856	0.336541	-0.468301	0.023309	-0.288833	0.311133	-0.247375	0.998188
PFLU_0511	putative GTP-ase	0.843979	5.15132e-05	0.734786	0.000183376	0.555483	0.00285833	0.634773	0.000911298	-0.288495	0.249749	-0.100014	0.998188
PFLU_1742	putative deoxyguanosinetriphosphate triphosphohydrolase	0.170269	0.281218	-0.345075	0.0317903	-0.118019	0.473831	-0.311268	0.0567373	-0.288288	0.242141	0.0338067	0.998188
PFLU_5025	putative N-acetylglucosamine-6-phosphate deacetylase	0.783934	0.0244759	1.60639	7.79534e-05	0.495696	0.15985	1.07316	0.00391506	-0.288238	0.570799	-0.53323	0.922796
PFLU_0944	mraY, phospho-N-acetylmuramoyl-pentapeptide-transfera se	-0.591196	0.00383487	-1.53093	2.32423e-07	-0.879261	0.000160419	-1.71593	8.46254e-08	-0.288065	0.332604	-0.184995	0.998188
PFLU_5877	putative ubiquinone biosynthesis-related exported protein	-0.389739	0.0116025	-0.521393	0.00137171	-0.677404	0.000194	-0.629894	0.000354767	-0.287665	0.219928	-0.108501	0.998188
PFLU_5227	hemin ABC transporter, ATP-binding protein	-0.714552	0.00187795	-0.421208	0.0402849	-1.00204	0.000170772	-0.487427	0.0268152	-0.287485	0.39125	-0.0662188	0.998188
PFLU_3861	putative transcriptional regulator	1.50187	0.000312255	1.45424	0.000381095	1.21459	0.00298383	1.42309	0.00074948	-0.287278	0.538067	-0.031149	0.998391
PFLU_2693	putative haloacid dehalogenase-like hydrolase	-1.1835	1.77705e-06	-1.14903	2.06643e-06	-1.47043	1.57517e-07	-1.15906	2.14961e-06	-0.286927	0.291775	-0.0100295	0.998391
PFLU_2094	conserved hypothetical protein	-0.127869	0.448896	-0.752676	0.000170002	-0.414731	0.0190599	-0.849942	6.83011e-05	-0.286862	0.275738	-0.0972656	0.998188
PFLU_3343	hypothetical protein	-0.464844	0.00348864	-0.732025	5.62794e-05	-0.75152	7.1197e-05	-0.667634	0.000212245	-0.286676	0.220283	0.0643906	0.998188
PFLU_4162	conserved hypothetical protein	1.13198	0.0101636	0.874942	0.0411506	0.845388	0.0647771	0.516729	0.277399	-0.28659	0.607115	-0.358213	0.998188
PFLU_3828	NADH-quinone oxidoreductase chain L	1.02509	3.07311e-06	0.662822	0.000276654	0.738824	0.000124373	0.617992	0.000577734	-0.286263	0.240437	-0.0448303	0.998188
PFLU_4756	putative arginine N-succinyltransferase, alpha chain	0.294034	0.0437594	-0.139414	0.32537	0.00826223	0.957778	-0.232506	0.109743	-0.285772	0.204174	-0.0930919	0.998188
PFLU_2645	ribonuclease HI	1.08436	3.34227e-05	1.00789	6.24883e-05	0.798691	0.000834409	1.14328	2.07595e-05	-0.285665	0.340665	0.13539	0.998188
PFLU_5174	conserved hypothetical protein	-4.38799	4.93692e-11	-3.58881	2.43713e-10	-4.67349	4.85416e-11	-4.0067	1.51728e-10	-0.285498	0.568949	-0.417887	0.990668
PFLU_5471	ribB, 3,4-dihydroxy-2-butanone 4-phosphate synthase	1.17871	1.40241e-07	1.09231	2.90512e-07	0.893263	5.03311e-06	1.01349	9.27867e-07	-0.28545	0.183509	-0.0788243	0.998188
PFLU_5872	putative aminotransferase	-1.39914	6.98269e-08	-1.94597	8.28027e-10	-1.68456	8.52823e-09	-2.047	6.37186e-10	-0.285423	0.251562	-0.101034	0.998188
PFLU_5048	putative exodeoxyribonuclease VII large subunit	-0.495256	0.0115928	-0.676362	0.00117572	-0.780646	0.000489965	-0.781484	0.000459304	-0.285389	0.332998	-0.105123	0.998188
PFLU_1573	lolD, lipoprotein releasing system ATP-binding protein	1.07834	0.000407182	0.744111	0.00729924	0.792951	0.00635458	0.793464	0.00643837	-0.285384	0.441851	0.0493524	0.998188
PFLU_0156	putative membrane protein	0.258507	0.533369	0.748581	0.0550142	-0.0267526	0.955123	0.340774	0.43253	-0.28526	0.643111	-0.407807	0.998188
PFLU_5161	conserved hypothetical protein	1.39788	2.17861e-05	1.47842	9.46352e-06	1.11267	0.000313929	1.39453	2.64557e-05	-0.285211	0.422289	-0.0838889	0.998188
PFLU_1026	putative fumarylacetoacetase	-3.31497	1.79033e-06	-2.68978	1.19421e-05	-3.60003	9.99901e-07	-2.86622	7.89929e-06	-0.285055	0.718642	-0.176441	0.998188
PFLU_3375	putative D-serine/D-alanine/glycine transporter	-0.455382	0.0453777	-0.148338	0.496655	-0.740038	0.00432503	-0.107136	0.649868	-0.284656	0.4227	0.0412019	0.998188
PFLU_5329	putative putative sensory box GGDEF/EAL domain protein	1.19099	2.71352e-06	0.98542	2.00496e-05	0.907012	7.35959e-05	0.959946	3.48242e-05	-0.283981	0.289203	-0.0254738	0.998188
PFLU_1847	putative lipoprotein	1.09156	2.00197e-06	0.911665	1.35784e-05	0.80766	7.71402e-05	0.756354	0.000135603	-0.283905	0.240437	-0.155311	0.998188
PFLU_1197	putative LysR-family regulatory protein	-0.804776	0.0295745	-0.677191	0.0585949	-1.08849	0.00635505	-0.795345	0.0338402	-0.283718	0.633159	-0.118154	0.998188
PFLU_0314	putative amino acid ABC transport system, ATP-binding protein	0.797377	0.000308782	0.944706	4.83507e-05	0.513895	0.0110753	0.678064	0.0014318	-0.283482	0.317143	-0.266641	0.990668
PFLU_6115	srlR, glucitol operon repressor	1.11898	0.000752766	1.01566	0.00155218	0.835514	0.00928588	0.654325	0.0365347	-0.283467	0.492917	-0.361332	0.998188
PFLU_1731	putative aminotransferase	0.172394	0.353434	0.092349	0.615717	-0.11103	0.565155	-0.0693594	0.714895	-0.283424	0.324481	-0.161708	0.998188
PFLU_0301	wssB, cellulose synthase catalytic subunit	0.680379	0.00425086	0.299674	0.17083	0.397191	0.0835093	0.186574	0.417179	-0.283187	0.386944	-0.1131	0.998188
PFLU_2147	hemB, delta-aminolevulinic acid dehydratase	0.149918	0.4609	0.834985	0.00031978	-0.133236	0.525762	0.462352	0.0253823	-0.283154	0.362359	-0.372633	0.86393
PFLU_6089	putative cation ABC trasnport system, ATP-binding protein	1.29898	0.0470795	0.810221	0.217603	1.01585	0.142257	1.2539	0.0686796	-0.283136	0.756292	0.443679	0.998188
PFLU_4332	putative fatty acid CoA ligase	0.137928	0.482652	-0.666219	0.00199742	-0.145204	0.475232	-0.485886	0.0202774	-0.283131	0.342373	0.180333	0.998188
PFLU_0359	hutC, histidine utilization repressor GntR-family	1.07356	1.27898e-05	1.11088	7.13076e-06	0.790682	0.000418014	0.836554	0.000230023	-0.282873	0.295364	-0.274322	0.967166
PFLU_1864	conserved hypothetical protein	1.80783	3.19427e-06	1.97965	8.43498e-07	1.52566	3.2377e-05	1.87744	2.3233e-06	-0.282176	0.454537	-0.10221	0.998188
PFLU_6018	conserved hypothetical protein	2.15699	1.24455e-07	1.57852	4.85951e-06	1.87495	9.22044e-07	1.71031	2.47047e-06	-0.282041	0.418027	0.131794	0.998188
PFLU_1380	acrA, acriflavine resistance protein A precursor	0.0534049	0.76281	-0.464623	0.00835856	-0.228611	0.178218	-0.82592	7.54228e-05	-0.282016	0.289074	-0.361297	0.739959
PFLU_4477	putative fatty acid transport system, membrane protein	-0.194995	0.170432	-0.998866	1.18752e-06	-0.476565	0.00251994	-1.1015	4.05332e-07	-0.28157	0.213599	-0.10263	0.998188
PFLU_3555	putative two-component regulator sensor histidine kinase protein	-0.785875	0.000256208	-1.0278	1.47416e-05	-1.06697	1.8609e-05	-0.905413	9.3372e-05	-0.28109	0.335231	0.122385	0.998188
PFLU_0327	hisB, imidazoleglycerol-phosphate dehydratase	2.76335	2.98344e-10	3.01326	6.88676e-11	2.48228	1.58429e-09	3.00381	8.65893e-11	-0.281068	0.306233	-0.00944956	0.998391
PFLU_0700	putative two-component system, sensor kinase	1.48016	0.00808219	1.15149	0.031838	1.19936	0.0311772	0.909128	0.0989934	-0.280799	0.720583	-0.242364	0.998188
PFLU_2451	putative transport-related membrane protein	1.23572	0.000366646	0.826713	0.00859475	0.95531	0.00436022	0.379087	0.239901	-0.280413	0.496943	-0.447626	0.967166
PFLU_3372	conserved hypothetical protein	0.0827301	0.724127	-0.25264	0.252919	-0.197522	0.39395	-0.0744469	0.749055	-0.280252	0.418255	0.178193	0.998188
PFLU_2788	heme uptake transmembrane sensor	-1.95136	5.26884e-07	-0.765401	0.00322866	-2.23132	2.88141e-07	-1.02525	0.00054631	-0.279963	0.54827	-0.259851	0.998188
PFLU_0569	lipA, lipase precursor	-2.16161	9.56253e-10	-2.65128	6.43636e-11	-2.44144	3.85223e-10	-2.95294	3.942e-11	-0.279828	0.328214	-0.301663	0.989476
PFLU_1966	putative pilL-related (pseudogene)	0.336979	0.174572	0.776268	0.0031047	0.0574505	0.839164	0.759509	0.00518279	-0.279529	0.448331	-0.0167586	0.998391
PFLU_0081	putative cytochrome c5	-0.221057	0.155631	-0.370055	0.0199271	-0.500356	0.0035001	-0.387477	0.0164493	-0.279299	0.254992	-0.0174218	0.998188
PFLU_3923	putative sugar efflux transporter	0.0303118	0.924694	0.535972	0.0548735	-0.248692	0.424867	-0.0636546	0.840817	-0.279004	0.527541	-0.599627	0.73497
PFLU_0070	metN, D-methionine ABC transport system, ATP-binding protein	1.00371	5.04599e-05	1.27733	2.6346e-06	0.724958	0.00146138	0.979533	8.0019e-05	-0.278752	0.329345	-0.297796	0.952194
PFLU_3231	general secretion pathway protein E/R	0.456016	0.208826	0.39271	0.2745	0.177414	0.66139	0.534445	0.159287	-0.278603	0.609903	0.141735	0.998188
PFLU_1087A	conserved hypothetical protein	0.836221	0.00610719	1.10723	0.000534397	0.557888	0.0718329	1.10906	0.000906716	-0.278333	0.478975	0.00183488	0.998705
PFLU_5387	putative membrane protein	-0.000126603	0.999828	-0.211428	0.364433	-0.278192	0.258291	-0.0769309	0.758183	-0.278065	0.441573	0.134497	0.998188
PFLU_1038	putative transport-related membrane protein	-0.0107727	0.984273	0.861725	0.0349222	-0.28833	0.550822	1.06435	0.0150661	-0.277557	0.682374	0.202624	0.998188
PFLU_5469	putative N utilisation-related protein	1.78021	2.94889e-07	1.87538	1.20364e-07	1.50271	3.08365e-06	1.89485	1.34202e-07	-0.277505	0.378938	0.0194686	0.998391
PFLU_4688	putative exported protein	0.641491	0.0255149	0.688372	0.0163455	0.364065	0.194502	0.85449	0.0043935	-0.277426	0.531549	0.166118	0.998188
PFLU_3439	conserved hypothetical GAF domain protein	0.225002	0.187924	-0.463362	0.00988531	-0.0524224	0.778027	-0.0511803	0.773902	-0.277425	0.296956	0.412181	0.654796
PFLU_5013	signal recognition particle protein	2.40814	6.27298e-10	2.88091	4.81053e-11	2.13073	3.46844e-09	2.83745	6.61918e-11	-0.277406	0.309913	-0.043463	0.998188
PFLU_4628	2-methylcitrate dehydratase	0.295979	0.0828073	-0.303738	0.0713743	0.0187307	0.920329	-0.26532	0.117353	-0.277248	0.296956	0.0384185	0.998188
PFLU_3835	hypothetical protein	0.759218	0.000839847	0.892062	0.000160756	0.483341	0.025473	1.15972	1.39197e-05	-0.275877	0.336521	0.267663	0.990668
PFLU_0438	conserved hypothetical protein	1.00819	0.000138521	0.96698	0.000185504	0.732521	0.0031442	0.897992	0.000557315	-0.275665	0.375956	-0.0689886	0.998188
PFLU_1602	putative transport-related, membrane protein	1.11933	0.000544912	0.899876	0.00313599	0.844018	0.00714141	0.695069	0.0240259	-0.275313	0.478975	-0.204807	0.998188
PFLU_0373	mdoG, glucans biosynthesis protein G precursor	0.552182	0.000972198	0.381807	0.0123957	0.276967	0.0658775	0.401912	0.00959991	-0.275215	0.239207	0.0201046	0.998188
PFLU_5561	trpE, anthranilate synthase component I	1.24681	7.4349e-07	0.973759	1.13768e-05	0.971621	1.70985e-05	0.774272	0.000169354	-0.275188	0.278232	-0.199488	0.998188
PFLU_0522	putative phage-related protein	0.0856459	0.55636	-0.404997	0.00667835	-0.189504	0.18489	-0.45278	0.00325344	-0.27515	0.220283	-0.0477834	0.998188
PFLU_0228	putative amino acid ABC transport-system, membrane protein	0.437601	0.503997	0.22512	0.734573	0.162877	0.831364	0.357527	0.620984	-0.274724	0.783565	0.132407	0.998188
PFLU_0097	putative ABC transport system, ATP-binding protein	-0.539983	0.0577613	-1.14756	0.000517975	-0.814699	0.0097877	-1.49182	0.000124639	-0.274716	0.549856	-0.344265	0.998188
PFLU_0416	hemE, uroporphyrinogen decarboxylase	0.499375	0.0103152	0.465208	0.0144894	0.225183	0.233691	0.361193	0.0559651	-0.274192	0.332008	-0.104014	0.998188
PFLU_3552	conserved hypothetical protein	0.871165	0.00383527	1.22368	0.000160861	0.597069	0.0476119	1.19083	0.000348102	-0.274096	0.480248	-0.0328514	0.998188
PFLU_4432	putative response regulator	-1.86689	3.58609e-09	-2.38173	1.37203e-10	-2.1409	9.08366e-10	-2.3449	2.21862e-10	-0.274009	0.296956	0.0368344	0.998188
PFLU_0024	aroE, shikimate dehydrogenase	0.989135	0.00399465	1.03491	0.00257982	0.715201	0.0327678	0.98267	0.00477468	-0.273934	0.56588	-0.0522361	0.998188
PFLU_4242	conserved hypothetical protein	-0.570925	0.0036206	-1.36496	5.59309e-07	-0.844784	0.000160211	-1.39331	6.74507e-07	-0.273859	0.336459	-0.0283441	0.998188
PFLU_3565	conserved hypothetical protein	0.149702	0.57603	0.521586	0.0409337	-0.124153	0.666836	0.717356	0.00965881	-0.273855	0.483126	0.19577	0.998188
PFLU_4258	conserved hypothetical protein	-0.412346	0.0721565	-0.699044	0.00436561	-0.685953	0.00740346	-0.337157	0.1523	-0.273608	0.446003	0.361888	0.980251
PFLU_3769	low molecular weight phosphotyrosine protein phosphatase	0.0826528	0.72893	0.292378	0.187844	-0.190483	0.432077	0.193322	0.410926	-0.273136	0.430983	-0.0990557	0.998188
PFLU_5545	putative peptidase	-1.84688	3.76141e-09	-1.44424	6.17891e-08	-2.12	8.58247e-10	-1.5859	2.1117e-08	-0.273122	0.289878	-0.14166	0.998188
PFLU_5599	pqqB, coenzyme PQQ synthesis protein B	0.825932	0.000500489	1.24219	5.84076e-06	0.552982	0.0124452	1.26238	6.42754e-06	-0.27295	0.367957	0.0201971	0.998391
PFLU_6103	conserved hypothetical exported protein	1.54008	0.000123499	1.06179	0.00342679	1.26724	0.00117881	0.834664	0.0249306	-0.272842	0.532828	-0.227124	0.998188
PFLU_5579	conserved hypothetical protein	-1.12024	3.72407e-06	-1.58371	5.07964e-08	-1.39307	4.9793e-07	-1.671	5.59081e-08	-0.272827	0.33407	-0.0872871	0.998188
PFLU_5432	putative membrane protein	-1.93483	5.99516e-09	-2.48631	2.09922e-10	-2.20737	1.68686e-09	-2.51368	2.95647e-10	-0.272547	0.337628	-0.0273681	0.998188
PFLU_2246	conserved hypothetical protein	1.40776	0.00247697	2.11048	4.15946e-05	1.13534	0.0145033	2.34025	1.7247e-05	-0.272421	0.642557	0.229772	0.998188
PFLU_5824	rpiA, ribose-5-phosphate isomerase A	1.09212	5.83312e-05	0.969497	0.000173537	0.819791	0.00118643	0.811822	0.00125508	-0.272328	0.383798	-0.157676	0.998188
PFLU_3489	aconitate hydrase B	0.468933	0.0359334	0.109533	0.614697	0.196742	0.374509	0.00333925	0.988802	-0.272191	0.425753	-0.106194	0.998188
PFLU_0557	putative amino acid oxidase	1.02786	1.12585e-05	0.920247	3.22806e-05	0.7557	0.000335283	0.748235	0.000335392	-0.272164	0.303836	-0.172013	0.998188
PFLU_5880	pepP, Xaa-Pro aminopeptidase	0.855535	2.78264e-05	1.11417	1.06264e-06	0.583371	0.00131764	0.913398	1.39494e-05	-0.272163	0.257365	-0.200771	0.998188
PFLU_2724	putative membrane protein	-1.57575	1.69681e-06	-2.15172	4.10093e-08	-1.84791	5.65537e-07	-2.16836	1.02483e-07	-0.272162	0.482434	-0.0166425	0.998391
PFLU_4566	putative cytochrome maturation protein	-0.329708	0.109177	-0.307407	0.127959	-0.60174	0.00887493	-0.410769	0.0589114	-0.272032	0.400044	-0.103362	0.998188
PFLU_1193	conserved hypothetical protein	-0.643189	0.00389308	-0.811318	0.000563475	-0.915075	0.000299379	-1.04558	8.50638e-05	-0.271886	0.407094	-0.234266	0.998188
PFLU_1626	putative transport-related membrane protein	0.191803	0.509425	0.318326	0.253158	-0.0798837	0.808227	-0.595178	0.0703046	-0.271687	0.530668	-0.913504	0.441773
PFLU_0666	putative ArsR-family regulatory protein	-0.0199085	0.939736	-0.298732	0.197086	-0.29157	0.2367	0.107534	0.662474	-0.271662	0.443787	0.406266	0.904366
PFLU_0096	conserved hypothetical membrane protein	-0.7095	0.00199356	-1.29376	6.11061e-06	-0.981132	0.000194	-1.20326	2.82809e-05	-0.271632	0.415508	0.0904955	0.998188
PFLU_0949	ddlB, D-alanine--D-alanine ligase B	-1.44247	2.15815e-06	-2.32252	5.54753e-09	-1.71402	3.51751e-07	-2.4833	3.35878e-09	-0.271554	0.417526	-0.160783	0.998188
PFLU_5862	argA, amino-acid acetyltransferase	0.262402	0.0355809	0.102018	0.398375	-0.00884485	0.947164	0.0261081	0.836971	-0.271247	0.17169	-0.07591	0.998188
PFLU_2774	putative 3-phosphoshikimate 1-carboxyvinyltransferase	1.06641	0.000203626	1.02974	0.000251804	0.795225	0.00299517	0.82829	0.00207479	-0.271188	0.447815	-0.201446	0.998188
PFLU_3513	exonuclease	1.65233	1.60134e-07	1.88767	2.13025e-08	1.3812	2.08306e-06	1.88952	2.88289e-08	-0.271132	0.328378	0.00184806	0.998705
PFLU_4244	hypothetical protein	0.506958	0.245224	0.526358	0.218684	0.235929	0.632618	-0.0338474	0.948954	-0.271029	0.666348	-0.560205	0.998188
PFLU_0616	prmA, ribosomal protein L11 methyltransferase	1.53529	1.24402e-05	1.49766	1.38016e-05	1.2646	0.000142885	1.29009	0.000110602	-0.270692	0.457832	-0.207575	0.998188
PFLU_0859	putative lipoprotein A-like protein	0.424979	0.0972822	0.190296	0.455129	0.154301	0.576486	0.23342	0.383973	-0.270678	0.477845	0.0431239	0.998188
PFLU_1183	putative phage-related protein	1.01958	0.0527743	1.22835	0.0185587	0.748913	0.184986	0.796211	0.162045	-0.270663	0.704578	-0.432139	0.998188
PFLU_1597	conserved hypothetical protein	-5.10839	1.4944e-11	-5.84818	2.92568e-12	-5.379	1.23233e-11	-5.6347	5.48006e-12	-0.270611	0.538439	0.213479	0.998188
PFLU_1808	putative lipoprotein	0.0185467	0.903475	-0.544778	0.000682959	-0.252002	0.0821572	-0.49964	0.00182101	-0.270549	0.220366	0.0451378	0.998188
PFLU_0448	conserved hypothetical protein	1.45066	1.32132e-05	1.35922	2.38067e-05	1.1803	0.000192207	1.40881	2.63405e-05	-0.270368	0.421116	0.0495818	0.998188
PFLU_5464	putative exported protein	1.10511	0.00158687	0.972298	0.00402005	0.834831	0.0167376	0.602737	0.0828833	-0.270277	0.522708	-0.369561	0.998188
PFLU_4491	putative cob(I)yrinic acid a,c-diamide adenosyltransferase	0.635421	0.0338513	0.673578	0.0234587	0.365158	0.234664	0.633729	0.0399438	-0.270263	0.532807	-0.0398487	0.998188
PFLU_0935	hypothetical protein	-0.213367	0.352329	-0.487663	0.0360846	-0.48333	0.0506929	-0.482147	0.052689	-0.269963	0.447815	0.00551586	0.998391
PFLU_4713	ribosomal large subunit pseudouridine synthase C	0.966032	0.000277234	1.13219	4.84078e-05	0.696293	0.00485606	0.92725	0.000431652	-0.269739	0.4227	-0.204942	0.998188
PFLU_5782	putative peptidase	1.49654	7.21526e-06	1.54719	4.04249e-06	1.22685	9.16277e-05	1.29032	4.87317e-05	-0.269694	0.432159	-0.256868	0.998188
PFLU_3827	NADH dehydrogenase I chain K	1.09337	2.04679e-05	0.539449	0.0097124	0.823765	0.000518511	0.511141	0.0179514	-0.269601	0.340022	-0.0283077	0.998188
PFLU_4908	TolB colicin import protein	0.315878	0.0238005	0.000894562	0.994282	0.0464743	0.749279	0.0115896	0.933778	-0.269404	0.209784	0.010695	0.998391
PFLU_1631	putative proline iminopeptidase	0.287432	0.262906	0.0615262	0.814195	0.0180415	0.950362	-0.377559	0.176698	-0.26939	0.48407	-0.439085	0.93038
PFLU_5427	proA, gamma-glutamyl phosphate reductase	2.35071	4.30626e-10	2.81215	3.28901e-11	2.08146	2.42781e-09	2.75948	4.68388e-11	-0.269248	0.29812	-0.0526742	0.998188
PFLU_4043	conserved hypothetical protein	-0.445065	0.0664128	-1.48017	8.74433e-06	-0.71427	0.00772901	-0.798443	0.00385106	-0.269205	0.480248	0.681732	0.616112
PFLU_0733	ispE, 4-diphosphocytidyl-2-C-methyl-D-erythritol kinase	1.65991	3.24674e-06	1.58248	4.65125e-06	1.39075	2.72746e-05	1.6407	3.49906e-06	-0.26916	0.480248	0.0582231	0.998188
PFLU_2553	viscC, putative non-ribosomal peptide synthetase	-0.296202	0.218733	-0.620907	0.0132143	-0.565051	0.0268351	-0.615483	0.0168298	-0.268849	0.478975	0.00542441	0.998391
PFLU_3864	putative pH adaptation potassium efflux protein (pseudogene)	0.7938	9.72481e-05	0.526675	0.00323655	0.525076	0.00432393	0.38367	0.0277302	-0.268724	0.285962	-0.143006	0.998188
PFLU_4324	csrA2, carbon storage regulator	-1.53305	0.00114891	-1.68391	0.000490804	-1.80174	0.000567866	-1.71228	0.000879085	-0.268691	0.731134	-0.0283649	0.998391
PFLU_5506	rpmJ, 50S ribosomal protein L36	2.1435	5.99478e-10	2.30399	1.72039e-10	1.87483	3.91878e-09	2.35082	1.51728e-10	-0.268676	0.276909	0.0468314	0.998188
PFLU_2712	putative 2-hydroxyacid dehydrogenase	-0.48229	0.0413682	-0.81246	0.00157188	-0.75049	0.003733	-0.630264	0.0111433	-0.2682	0.465779	0.182196	0.998188
PFLU_6045	pstB, phosphate ABC transport system, ATP-binding protein	-0.0533035	0.821404	-0.132396	0.546823	-0.321371	0.1623	-0.155952	0.49637	-0.268068	0.431713	-0.0235563	0.998391
PFLU_6126	putative chromosome partitioning protein ParB	1.02693	3.45066e-05	0.950888	6.68671e-05	0.758886	0.000814386	1.0047	4.75127e-05	-0.268042	0.350939	0.0538169	0.998188
PFLU_3522	conserved hypothetical protein	-0.11449	0.552435	-1.12716	9.12359e-06	-0.382451	0.050339	-1.01566	4.26343e-05	-0.267961	0.360137	0.111504	0.998188
PFLU_3797	serine tRNA synthetase	1.17468	4.83429e-07	0.965773	4.18941e-06	0.907049	1.24746e-05	0.977374	4.43396e-06	-0.267632	0.251562	0.0116014	0.998391
PFLU_0144	putative lipoprotein	-0.591922	0.00117267	-2.03313	1.0323e-09	-0.859318	4.55266e-05	-1.75003	1.15157e-08	-0.267396	0.297936	0.283103	0.962751
PFLU_4003	Ais protein	-1.14481	0.014327	-1.52021	0.00244041	-1.41211	0.00757214	-1.2784	0.0147052	-0.267301	0.755358	0.241818	0.998188
PFLU_0258	putative S1 RNA-binding domain protein	0.89517	1.25786e-05	0.94202	5.81642e-06	0.628169	0.00053567	0.759755	7.48891e-05	-0.267001	0.258022	-0.182265	0.998188
PFLU_6051	putative aldose 1-epimerase	1.29241	1.60146e-07	1.53684	1.30158e-08	1.02544	3.32594e-06	1.40324	5.29987e-08	-0.266973	0.25292	-0.133599	0.998188
PFLU_2680	conserved hypothetical protein	1.00972	0.00012728	0.930585	0.000251613	0.742934	0.00249323	0.859288	0.000714456	-0.266786	0.400044	-0.0712969	0.998188
PFLU_6044	phoU, phosphate ABC transport system protein	0.0454768	0.861184	0.026053	0.9138	-0.221068	0.381555	-0.065631	0.796783	-0.266545	0.471886	-0.091684	0.998188
PFLU_0499	parE, topoisomerase IV subunit B	0.0144535	0.945991	-0.259306	0.159554	-0.251985	0.184286	-0.352592	0.0624092	-0.266439	0.361022	-0.0932854	0.998188
PFLU_1874	putative transport-related acyltransferase protein	0.463316	0.00427385	-0.134348	0.368898	0.197086	0.200793	-0.265079	0.0896681	-0.26623	0.249749	-0.130731	0.998188
PFLU_0841	petA, ubiquinol-cytochrome C reductase iron-sulfur subunit	-0.882702	7.17824e-06	-1.31787	4.52438e-08	-1.14881	3.7423e-07	-1.29717	6.43793e-08	-0.266112	0.246656	0.0206978	0.998188
PFLU_3850	putative exported protein	0.323507	0.231285	-0.0993415	0.721539	0.0576734	0.851469	-0.0913773	0.758588	-0.265833	0.514083	0.00796429	0.998391
PFLU_2178	mgtA, magnesium transporting ATPase	-1.40263	0.000312494	-1.23345	0.000828756	-1.66845	9.46463e-05	-1.69005	8.01951e-05	-0.265824	0.635194	-0.456606	0.998188
PFLU_2613	putative phosphoglycerate mutase family protein	0.195921	0.231079	0.414657	0.0135931	-0.069836	0.692064	0.273167	0.100458	-0.265757	0.292671	-0.14149	0.998188
PFLU_4789	putative glycerophosphoryl diester phosphodiesterase	-0.411639	0.00872467	-0.401697	0.00929728	-0.677245	0.000203609	-0.38451	0.0140774	-0.265606	0.256328	0.0171876	0.998188
PFLU_4958	conserved hypothetical protein	2.08576	2.92635e-06	3.20856	5.82609e-09	1.8204	2.34102e-05	2.87256	4.13143e-08	-0.265363	0.504057	-0.336004	0.990668
PFLU_1621	putative reductase	-0.480543	0.0111815	-0.225463	0.202509	-0.745816	0.000443314	-0.455586	0.0147676	-0.265272	0.347243	-0.230123	0.998188
PFLU_0805	fruK, 1-phosphofructokinase	1.19449	3.61215e-05	0.441997	0.0537295	0.929334	0.000542134	0.326766	0.164013	-0.265155	0.423982	-0.115231	0.998188
PFLU_1159	nth, endonuclease III	0.513517	0.00332972	0.66273	0.000344639	0.248582	0.137214	0.433134	0.0122584	-0.264935	0.275738	-0.229596	0.990668
PFLU_2715	conserved hypothetical protein	0.997039	0.000810113	0.464411	0.0764809	0.732198	0.0100816	0.507478	0.063889	-0.264842	0.489055	0.0430666	0.998188
PFLU_4680	putative NADP-dependent alcohol dehydrogenase	0.355584	0.0503951	0.12221	0.491878	0.0909829	0.631401	0.107865	0.561055	-0.264601	0.333958	-0.0143447	0.998391
PFLU_1869	putative ABC transport system, membrane protein	1.15721	2.78622e-05	1.04945	6.90799e-05	0.892648	0.000537653	0.924285	0.000368681	-0.264557	0.384842	-0.125167	0.998188
PFLU_5265	carbamoyl-phosphate synthase large chain	0.795585	4.12482e-05	0.56278	0.000978053	0.5313	0.00186253	0.349729	0.0249903	-0.264284	0.271513	-0.213052	0.990972
PFLU_4836	KHG/KDPG aldolase	-0.498586	0.027328	-1.24768	1.56388e-05	-0.762718	0.00204567	-1.30477	1.2018e-05	-0.264132	0.445172	-0.0570908	0.998188
PFLU_4403	putative sensor kinase protein	0.996644	1.07951e-05	0.881124	3.57535e-05	0.732582	0.000346789	0.752841	0.000247253	-0.264062	0.295661	-0.128284	0.998188
PFLU_3916	putative hydrolase	1.223	3.09713e-05	1.54047	1.70537e-06	0.95896	0.000494316	1.39166	8.36404e-06	-0.264038	0.417953	-0.148818	0.998188
PFLU_0922	putative medium-chain-fatty-acid--CoA ligase	-0.952136	0.007144	-0.628362	0.0565673	-1.21616	0.00133768	-0.568928	0.0851416	-0.264023	0.624655	0.0594336	0.998188
PFLU_5515	rplE, 50S ribosomal protein L5	1.99273	1.90963e-08	2.04644	1.00886e-08	1.72885	1.23134e-07	2.09262	8.42279e-09	-0.263876	0.384667	0.046174	0.998188
PFLU_0643	putative membrane protein	-1.59684	7.29349e-07	-2.77327	9.68971e-10	-1.8604	2.097e-07	-2.15487	3.80002e-08	-0.263558	0.460101	0.618404	0.616112
PFLU_0093	gltP, proton glutamate symport protein	1.28849	9.07267e-05	1.73377	2.68159e-06	1.02533	0.00100713	1.72545	3.6627e-06	-0.263159	0.494601	-0.00831714	0.998391
PFLU_4220	putative cobalamin ABC transport system, permease protein	0.152109	0.749188	0.08183	0.858196	-0.110782	0.835378	0.232971	0.638119	-0.26289	0.711833	0.151141	0.998188
PFLU_1153	rnt, ribonuclease T	0.620368	0.00193233	0.472329	0.0116457	0.357591	0.0559538	0.42859	0.0229758	-0.262777	0.337954	-0.0437393	0.998188
PFLU_5415	putative muramoyltetrapeptide carboxypeptidase	-0.938991	5.0841e-06	-1.63833	4.32729e-09	-1.20137	3.54788e-07	-1.49312	1.97929e-08	-0.262377	0.271513	0.14521	0.998188
PFLU_0682	conserved hypothetical protein	1.76019	5.23901e-07	2.17932	2.53802e-08	1.49807	4.92129e-06	1.96502	1.31923e-07	-0.262124	0.416393	-0.214304	0.998188
PFLU_6054	purK, phosphoribosylaminoimidazole carboxylase atpase subunit	1.15134	6.54551e-06	1.40426	4.91187e-07	0.889634	0.000132563	1.25939	2.33191e-06	-0.26171	0.347243	-0.144873	0.998188
PFLU_1705	hypothetical protein	0.194578	0.248419	-0.326162	0.0546898	-0.0668649	0.711511	-0.408494	0.0231067	-0.261443	0.316777	-0.0823321	0.998188
PFLU_4570	fumarate and nitrate reduction regulatory protein	0.913659	2.23262e-06	0.939625	1.30132e-06	0.652236	0.00011166	0.822167	7.66293e-06	-0.261423	0.213599	-0.117459	0.998188
PFLU_4334	conserved hypothetical protein	3.27953	3.20762e-06	3.23513	3.06622e-06	3.01821	8.23998e-06	3.45096	1.65563e-06	-0.26132	0.738388	0.215835	0.998188
PFLU_5001	putative transferase	-0.259499	0.164403	-0.50671	0.00955882	-0.520789	0.01066	-0.508955	0.0118807	-0.26129	0.372543	-0.00224436	0.998705
PFLU_1437	conserved hypothetical protein	-0.247014	0.430932	-0.59966	0.0565673	-0.508283	0.125037	-0.507467	0.126578	-0.261268	0.604365	0.0921926	0.998188
PFLU_6116	glmU, bifunctional GlmU protein [includes: UDP-N-acetylglucosamine pyrophosphorylase; glucosamine-1-phosphate N-acetyltransferase]	1.13179	1.5867e-05	1.35687	1.65321e-06	0.870624	0.0002621	1.12215	1.64219e-05	-0.261171	0.39125	-0.234724	0.998188
PFLU_5351	putative exported protein	0.658097	0.032406	0.156059	0.610443	0.397002	0.211481	0.239711	0.458659	-0.261095	0.558558	0.0836518	0.998188
PFLU_6075	uvrD, DNA helicase II	1.57237	2.76111e-07	1.88922	2.12514e-08	1.31171	2.98068e-06	1.7983	4.65723e-08	-0.260661	0.372571	-0.090916	0.998188
PFLU_5817	conserved hypothetical membrane protein	1.1227	0.000349728	1.26985	8.62131e-05	0.862299	0.00440196	1.31367	9.07489e-05	-0.260396	0.486874	0.0438225	0.998188
PFLU_5497	putative transport-related membrane protein	-0.35788	0.00984296	-0.53691	0.000399046	-0.617906	0.000139932	-0.62678	0.000106189	-0.260026	0.213969	-0.08987	0.998188
PFLU_3800	outer-membrane lipoprotein carrier protein	1.29973	2.18523e-07	1.04648	2.68159e-06	1.03975	4.59499e-06	1.16026	1.04264e-06	-0.259977	0.265764	0.113789	0.998188
PFLU_5401	hemL, glutamate-1-semialdehyde 2,1-aminomutase	-0.106949	0.458014	-0.0993228	0.4809	-0.366601	0.0151704	-0.218873	0.124113	-0.259651	0.248053	-0.11955	0.998188
PFLU_1290	kdsA, 2-dehydro-3-deoxyphosphooctonate aldolase	0.44437	0.00301142	0.373729	0.00895952	0.184742	0.185528	0.163484	0.233727	-0.259629	0.2253	-0.210245	0.989476
PFLU_4906	putative exported protein	0.697884	0.000220612	0.40282	0.0136521	0.438509	0.00948389	0.416636	0.0119173	-0.259376	0.293899	0.0138166	0.998391
PFLU_5642	conserved hypothetical protein	-0.0296993	0.892773	-0.463737	0.0256247	-0.288584	0.168295	-0.713874	0.00234191	-0.258885	0.410076	-0.250137	0.998188
PFLU_6104	conserved hypothetical membrane protein	1.59243	2.27295e-07	1.63379	1.2882e-07	1.33366	3.03623e-06	1.56502	3.40052e-07	-0.258773	0.340059	-0.0687696	0.998188
PFLU_5012	30S ribosomal protein S16	2.3574	4.41778e-10	2.67311	6.81444e-11	2.09904	2.21827e-09	2.55543	1.3216e-10	-0.258364	0.328378	-0.11768	0.998188
PFLU_1334	conserved hypothetical protein	0.130381	0.417023	0.271561	0.0837289	-0.127768	0.437403	0.17171	0.28042	-0.258149	0.297936	-0.099851	0.998188
PFLU_0625	putative translation initiation factor	2.13561	9.52554e-07	2.20189	5.1374e-07	1.87773	6.38757e-06	2.09645	1.36938e-06	-0.257877	0.512442	-0.105443	0.998188
PFLU_0234	putative transport-related membrane protein	0.0196428	0.897325	-0.802256	1.38957e-05	-0.238217	0.097172	-0.619951	0.000265049	-0.25786	0.241619	0.182304	0.998188
PFLU_0160	conserved hypothetical lipoprotein	-0.0360608	0.898969	-0.462775	0.0812041	-0.293915	0.295989	-0.769037	0.0134153	-0.257854	0.523687	-0.306262	0.998188
PFLU_1203	conserved hypothetical protein	1.15602	6.85048e-06	1.18587	4.22529e-06	0.898226	0.000122264	1.10258	1.15181e-05	-0.257799	0.366338	-0.0832883	0.998188
PFLU_4128C	hypothetical protein	-0.740735	0.000461933	-1.51458	1.64285e-07	-0.998447	2.99628e-05	-1.65399	8.04319e-08	-0.257712	0.367957	-0.139401	0.998188
PFLU_1576	cusR, heavy metal two component system, response regulator	2.40473	4.76469e-10	2.71746	7.62925e-11	2.14728	2.41424e-09	2.46385	2.95647e-10	-0.257451	0.331996	-0.25361	0.990668
PFLU_4663	putative cytochrome C-related protein	0.053023	0.798341	0.114037	0.557669	-0.204397	0.308135	0.282357	0.148086	-0.25742	0.398989	0.16832	0.998188
PFLU_2595	putative membrane protein	-0.650284	0.00174216	-0.82033	0.000209801	-0.907279	0.0001377	-0.96471	7.52012e-05	-0.256994	0.388093	-0.14438	0.998188
PFLU_0902	conserved hypothetical protein	0.816867	0.0544	0.871428	0.0377248	0.560307	0.215803	0.647148	0.149977	-0.25656	0.671706	-0.224279	0.998188
PFLU_5543	birA, bifunctional protein [includes: biotin operon repressor; biotin--[acetyl-CoA-carboxylase] synthetase (biotin--protein ligase)]	0.694921	0.0115192	0.562303	0.034191	0.4384	0.114331	0.74359	0.00957613	-0.256521	0.500041	0.181286	0.998188
PFLU_1914	hypothetical protein	-1.77888	8.93878e-10	-2.92151	1.72585e-12	-2.03514	2.06231e-10	-3.04799	1.36891e-12	-0.256256	0.249949	-0.126482	0.998188
PFLU_0943	murF, UDP-N-acetylmuramoyl-tripeptide--D-alanyl-D-ala ni ne ligase	-1.45415	1.56124e-07	-2.19279	7.30668e-10	-1.70995	2.6271e-08	-2.48003	2.29942e-10	-0.255796	0.347243	-0.287244	0.962751
PFLU_1575	putative heavy metal two-component system, sensor kinase	2.99994	3.59573e-11	3.10511	1.54462e-11	2.74415	1.36363e-10	2.94654	3.65221e-11	-0.255787	0.309686	-0.158568	0.998188
PFLU_3874	conserved hypothetical protein	2.28215	4.54198e-06	2.2898	3.59294e-06	2.0264	2.8804e-05	2.37968	3.39896e-06	-0.25575	0.568949	0.0898836	0.998188
PFLU_5343	putative methyltransferase	1.10675	2.71697e-06	1.18222	9.8362e-07	0.851228	7.43696e-05	1.188	1.3397e-06	-0.255526	0.293083	0.00578488	0.998391
PFLU_1117	putative acetyltransferase	-0.41563	0.0605751	-1.04758	0.000109272	-0.671137	0.00635505	-0.902405	0.00074805	-0.255507	0.463673	0.145174	0.998188
PFLU_2766	conserved hypothetical exported protein	1.07303	1.63295e-06	1.6166	6.24663e-09	0.817556	4.97286e-05	1.48286	2.71015e-08	-0.255469	0.265581	-0.133744	0.998188
PFLU_1263	putative cysteine desulfurase	0.984857	0.000220106	1.14886	3.80573e-05	0.729545	0.00369558	0.996876	0.000238038	-0.255312	0.429619	-0.151981	0.998188
PFLU_2616	putative exported protein	-1.9714	8.45081e-11	-3.30037	2.84884e-13	-2.22651	2.48559e-11	-3.19742	5.39214e-13	-0.255112	0.22234	0.102947	0.998188
PFLU_4465	conserved hypothetical protein	0.356549	0.126562	-0.186328	0.420948	0.101638	0.680234	-0.344884	0.145163	-0.254911	0.480709	-0.158556	0.998188
PFLU_0582	ureA, urease gamma subunit	0.927606	9.4109e-05	0.593698	0.00436169	0.673209	0.00239863	0.584216	0.00687479	-0.254398	0.358284	-0.00948119	0.998391
PFLU_3871	cysteinyl-tRNA synthetase	0.770298	0.000188036	0.817216	9.06797e-05	0.516211	0.00609882	0.720273	0.000388086	-0.254087	0.328381	-0.0969433	0.998188
PFLU_0844	sspA, stringent starvation protein A	0.619501	0.00534636	0.537076	0.0123118	0.365643	0.0918995	0.610625	0.00701123	-0.253857	0.410025	0.073549	0.998188
PFLU_1113	putative cytochrome C551 peroxidase precursor	-0.636029	0.00319154	-1.10894	1.81149e-05	-0.889836	0.000274811	-1.22199	1.2018e-05	-0.253806	0.419785	-0.113047	0.998188
PFLU_1762	ccmE, cytochrome C biogenesis protein	-0.0389894	0.888449	-0.615809	0.0214155	-0.292686	0.277334	-0.837885	0.00596909	-0.253696	0.522613	-0.222076	0.998188
PFLU_4994	proline tRNA synthetase	1.1493	1.25069e-06	1.13173	1.21823e-06	0.895636	2.45058e-05	0.921234	1.48678e-05	-0.25366	0.313149	-0.210494	0.998188
PFLU_5770	conserved hypothetical protein	0.732189	0.00102246	0.617776	0.00356056	0.478819	0.0235424	0.553501	0.00996633	-0.25337	0.381737	-0.0642752	0.998188
PFLU_4106	putative membrane protein	-0.687616	0.00698809	-0.715291	0.00493892	-0.940977	0.001108	-0.425562	0.0876602	-0.253361	0.515095	0.289729	0.998188
PFLU_5609	putative dehydrogenase	0.530799	0.0366408	0.511458	0.0403979	0.277442	0.268201	0.40224	0.103829	-0.253358	0.518314	-0.109218	0.998188
PFLU_1714	putative elongation factor	1.80022	9.39546e-09	2.06741	1.1522e-09	1.54695	7.08079e-08	2.03897	1.57464e-09	-0.25327	0.330498	-0.028438	0.998188
PFLU_2586	putative DnaK suppressor protein	3.3066	3.25705e-08	3.54441	8.81758e-09	3.05341	1.28577e-07	3.74879	5.18604e-09	-0.253191	0.543831	0.204378	0.998188
PFLU_4905	putative radical SAM-superfamily protein	1.84299	1.66616e-08	2.06556	2.5136e-09	1.59018	1.6994e-07	2.22536	1.29067e-09	-0.252809	0.314733	0.1598	0.998188
PFLU_1216	conserved hypothetical membrane protein	1.97429	8.26094e-09	1.2183	2.97763e-06	1.72182	5.91312e-08	1.01076	3.48155e-05	-0.252473	0.345367	-0.207543	0.998188
PFLU_2251	hypothetical protein	-0.522433	0.00522521	-0.756953	0.000237625	-0.77487	0.000328859	-0.540689	0.00541943	-0.252437	0.362043	0.216264	0.998188
PFLU_0388	conserved hypothetical protein	0.14274	0.522817	0.137177	0.528579	-0.109099	0.640786	0.000400564	0.998714	-0.251838	0.457832	-0.136776	0.998188
PFLU_0290	rfbA, glucose-1-phosphate thymidylyltransferase	-0.542622	0.000418237	-1.17778	5.97836e-08	-0.794281	1.01756e-05	-1.20297	6.04836e-08	-0.251659	0.230594	-0.025192	0.998188
PFLU_5027	putative multiphosphoryl transfer protein	0.904072	0.00244791	1.741	3.14614e-06	0.652441	0.0227246	1.01576	0.00101948	-0.251631	0.539042	-0.725236	0.51544
PFLU_5428	putative 3-methyladenine DNA glycosylase	0.368405	0.0883089	0.134263	0.533339	0.11698	0.614758	0.36748	0.0996534	-0.251425	0.43121	0.233217	0.998188
PFLU_4697	putative tetR-family regulatory protein	1.06765	9.87075e-06	1.1132	5.02104e-06	0.816333	0.000209884	1.15001	4.43396e-06	-0.251319	0.347243	0.036806	0.998188
PFLU_0690	hypothetical protein	-1.88123	1.18632e-05	-2.71932	2.85966e-07	-2.1325	9.54823e-06	-2.37052	4.6789e-06	-0.251271	0.686531	0.348795	0.998188
PFLU_4690	putative sugar kinase	0.412445	0.0411149	0.596849	0.0045458	0.161188	0.433361	0.791722	0.000553982	-0.251257	0.407568	0.194873	0.998188
PFLU_4322	putative glutamyl-aminopeptidase	1.10071	0.000337342	1.48258	1.35442e-05	0.849514	0.00330665	1.6987	3.34983e-06	-0.251194	0.527657	0.21612	0.998188
PFLU_2229	putative LysR-family regulatory protein	-0.39928	0.160921	-0.942854	0.0031092	-0.650176	0.0395122	-0.939868	0.00653148	-0.250896	0.590114	0.00298562	0.998705
PFLU_4677	electron transfer flavoprotein beta-subunit	1.09491	6.97597e-07	0.958864	2.79445e-06	0.844057	1.61232e-05	0.847264	1.26518e-05	-0.250856	0.276418	-0.111601	0.998188
PFLU_5771	putative membrane protein	1.88834	9.37005e-06	1.7467	2.03621e-05	1.6378	7.8293e-05	1.85806	1.6426e-05	-0.250548	0.533456	0.111362	0.998188
PFLU_2300	xylF, D-xylose ABC transport syste, substrate-binding periplasmic protein precursor	0.418838	0.140186	-0.351732	0.208548	0.168296	0.567028	-0.361942	0.200233	-0.250542	0.582415	-0.0102101	0.998391
PFLU_5011	16S rRNA processing protein	1.79292	3.35707e-08	2.04526	4.56568e-09	1.54247	2.43807e-07	1.87501	1.55817e-08	-0.250455	0.38088	-0.170248	0.998188
PFLU_0864	mreC, rod shape-determining protein	0.0930037	0.588183	-0.0571327	0.733971	-0.157128	0.36123	0.0298365	0.864085	-0.250132	0.330935	0.0869691	0.998188
PFLU_0887	kdsD, arabinose 5-phosphate isomerase	0.905861	6.27513e-06	0.913053	4.72786e-06	0.656012	0.00023286	0.664731	0.000183622	-0.249849	0.265581	-0.248322	0.922796
PFLU_5826	conserved hypothetical protein	-0.0768671	0.756385	-0.445561	0.0602467	-0.326576	0.184511	-0.226863	0.352989	-0.249709	0.498379	0.218697	0.998188
PFLU_4472	DNA recombination protein	0.769595	0.000142069	1.04823	4.00227e-06	0.519904	0.0050444	1.01959	7.53175e-06	-0.249691	0.317674	-0.0286422	0.998188
PFLU_3009	putative acetyltransferase	0.424283	0.0529095	0.973059	0.000127977	0.175108	0.448532	0.856607	0.000651848	-0.249175	0.434901	-0.116452	0.998188
PFLU_5076	putative membrane protein	2.69701	5.842e-10	2.31439	3.13611e-09	2.44826	2.68705e-09	2.34706	3.43234e-09	-0.248756	0.375034	0.032673	0.998188
PFLU_0113	pntAA, NAD(P) transhydrogenase subunit alpha 1	1.71151	6.36336e-08	1.85519	1.65563e-08	1.46281	5.61963e-07	1.81196	2.80868e-08	-0.248703	0.367675	-0.0432284	0.998188
PFLU_5449	putative regulatory protein	1.14618	0.00594337	0.979168	0.0155664	0.897589	0.0350208	1.31305	0.00302552	-0.248595	0.639863	0.333886	0.998188
PFLU_5382	putative membrane protein	-0.17557	0.571162	-0.101135	0.737403	-0.423978	0.196959	0.0881315	0.786024	-0.248408	0.604365	0.189266	0.998188
PFLU_0464	rfaG, lipopolysaccharide core biosynthesis protein	1.13179	0.000127099	0.927676	0.000776858	0.883398	0.00178479	0.911788	0.00136572	-0.248393	0.466203	-0.0158878	0.998391
PFLU_1067	conserved hypothetical protein	1.87901	4.76675e-06	2.24082	3.68034e-07	1.63072	4.2436e-05	2.03185	2.44706e-06	-0.248286	0.504057	-0.208973	0.998188
PFLU_0865	mreD, rod shape-determining protein	-0.839159	0.00578745	-0.872924	0.00404769	-1.08733	0.00142721	-1.09395	0.00153133	-0.248174	0.605972	-0.221029	0.998188
PFLU_0245	putative ABC transport system, permease	-0.165526	0.359332	-0.605447	0.00217015	-0.413505	0.0297585	-0.522298	0.00805048	-0.247979	0.375034	0.083149	0.998188
PFLU_6076	putative exported protein	3.84211	1.05056e-08	2.95288	1.58473e-07	3.59466	2.42283e-08	2.49761	1.1853e-06	-0.247457	0.642557	-0.455264	0.992665
PFLU_5212	exonuclease V alpha-subunit	0.0692189	0.726665	-0.158688	0.396034	-0.178007	0.362817	-0.278327	0.149603	-0.247226	0.39725	-0.119639	0.998188
PFLU_4938	formyltetrahydrofolate deformylase	0.989581	1.04364e-05	1.26687	4.47594e-07	0.742848	0.000256383	1.13806	2.06287e-06	-0.246733	0.329947	-0.128812	0.998188
PFLU_2748	putative thiol peroxidase	1.12542	2.17385e-07	0.894373	2.91212e-06	0.878745	4.85742e-06	0.808431	1.04153e-05	-0.24668	0.250253	-0.0859423	0.998188
PFLU_0503	putative membrane protein	0.352417	0.0129458	0.26134	0.0531572	0.105813	0.449612	0.104427	0.445045	-0.246604	0.244051	-0.156914	0.998188
PFLU_0951	ftsA, cell division protein	-1.43819	8.84864e-08	-2.36509	1.40374e-10	-1.68475	1.44915e-08	-2.53561	7.62726e-11	-0.246553	0.336521	-0.17052	0.998188
PFLU_1286	accA, acetyl-coenzyme A carboxylase carboxyl transferase subunit alpha	-0.797779	7.15522e-05	-0.638479	0.000529746	-1.04427	4.26851e-06	-0.730976	0.000161271	-0.246489	0.330935	-0.0924973	0.998188
PFLU_2853	conserved hypothetical protein	-0.174807	0.742475	-0.401156	0.432845	-0.421206	0.459353	-0.610563	0.297644	-0.246399	0.77703	-0.209407	0.998188
PFLU_5169	putative putative GTP-binding protein	2.97956	1.28511e-10	3.48208	1.29151e-11	2.73318	4.60898e-10	3.20964	3.97825e-11	-0.246374	0.38345	-0.272444	0.990668
PFLU_4866	putative membrane protein	0.824723	0.00110996	0.990872	0.000178741	0.578486	0.0170145	0.81726	0.00147723	-0.246238	0.450293	-0.173612	0.998188
PFLU_4560	cytochrome C oxidase subunit	-1.3848	3.47317e-06	-2.06554	2.53929e-08	-1.63082	7.32033e-07	-2.1791	2.18404e-08	-0.246015	0.472941	-0.113558	0.998188
PFLU_0477	putative deacetylase	0.668438	0.000288262	0.756757	7.26986e-05	0.422459	0.012271	0.878455	1.88425e-05	-0.24598	0.296956	0.121698	0.998188
PFLU_3181	conserved hypothetical protein	0.875587	0.0244318	0.787185	0.0393376	0.629673	0.122755	0.832412	0.041934	-0.245914	0.641861	0.0452264	0.998188
PFLU_2629	putative membrane protein	-0.25363	0.314547	-0.150988	0.545469	-0.499454	0.0602486	-0.095046	0.717496	-0.245823	0.538439	0.0559421	0.998188
PFLU_5251	tRNA pseudouridine synthase B	1.96645	8.87907e-10	2.27853	9.91995e-11	1.72063	5.83043e-09	2.2336	1.45769e-10	-0.245815	0.291008	-0.0449339	0.998188
PFLU_3822	NADH dehydrogenase I chain F	0.730861	3.7994e-05	0.460944	0.00233927	0.485298	0.00187723	0.288804	0.0408098	-0.245563	0.258352	-0.172141	0.998188
PFLU_0655	putative thiolase	-0.0236694	0.905842	-0.48681	0.0108782	-0.269188	0.149767	-0.246978	0.179376	-0.245519	0.389744	0.239832	0.998188
PFLU_4561	putative cytochrome c	-1.36271	1.87877e-07	-1.89467	2.29021e-09	-1.60822	2.77471e-08	-1.95285	1.80507e-09	-0.245505	0.340059	-0.0581807	0.998188
PFLU_3631	putative RNA polymerase sigma factor	-2.34803	1.76799e-06	-1.86783	1.34884e-05	-2.59328	1.96544e-06	-2.08272	1.65372e-05	-0.245253	0.730696	-0.214891	0.998188
PFLU_0644	putative membrane protein	-2.035	5.12509e-08	-3.74773	4.14579e-11	-2.27977	1.96087e-08	-3.71745	1.03798e-10	-0.244776	0.499596	0.0302805	0.998188
PFLU_1025	hmgA, homogentisate 1,2-dioxygenase	-3.18461	5.73655e-06	-2.52036	4.63102e-05	-3.42933	3.43936e-06	-2.587	4.26343e-05	-0.244716	0.780984	-0.0666376	0.998188
PFLU_0335	ctpA, carboxy-terminal processing protease precursor	0.0956712	0.46619	-0.192136	0.13288	-0.148928	0.256312	-0.215128	0.0980656	-0.244599	0.231704	-0.0229926	0.998188
PFLU_5470	ribH, 6,7-dimethyl-8-ribityllumazine synthase	1.88528	3.21451e-10	2.17549	3.56031e-11	1.64073	2.45509e-09	2.13898	5.28437e-11	-0.244555	0.237149	-0.0365081	0.998188
PFLU_3508	conserved hypothetical protein	1.22497	0.00241878	1.04469	0.00737633	0.980479	0.0160973	1.23255	0.00337363	-0.244491	0.624484	0.187858	0.998188
PFLU_1963	putative exported protein	0.0594175	0.83747	-0.249029	0.357454	-0.184858	0.529747	0.0540994	0.854027	-0.244276	0.558679	0.303128	0.998188
PFLU_1269	map1, methionine aminopeptidase	1.31475	1.91679e-07	1.51059	2.5432e-08	1.07054	2.74684e-06	1.40927	7.14747e-08	-0.244215	0.316251	-0.101319	0.998188
PFLU_1632	putative peptide ABC transport system, permease	0.493004	0.126096	0.496436	0.117615	0.248932	0.488772	0.50963	0.13744	-0.244072	0.604254	0.0131949	0.998705
PFLU_1114	conserved GGDEF domain protein	-1.10198	5.23756e-07	-1.90936	4.20735e-10	-1.34604	5.59462e-08	-1.9762	3.98021e-10	-0.244061	0.290111	-0.0668464	0.998188
PFLU_2457	putative manganese transport-related membrane protein	0.667588	0.000112496	0.836411	8.09526e-06	0.423552	0.00653852	0.739981	4.39631e-05	-0.244036	0.253693	-0.09643	0.998188
PFLU_4817	putative MFS family transport protein	0.399663	0.0417462	0.128489	0.504125	0.155741	0.441706	0.0883817	0.665162	-0.243922	0.403373	-0.0401071	0.998188
PFLU_4993	Beta-lactamase induction signal transducer AmpG	0.492438	0.0079855	0.376488	0.033245	0.248856	0.169379	0.415764	0.0240013	-0.243583	0.355587	0.0392765	0.998188
PFLU_1396	putative exported protein	-2.14222	1.59175e-09	-3.48915	4.04544e-12	-2.38547	5.48324e-10	-3.25561	1.12044e-11	-0.243253	0.37942	0.233542	0.998188
PFLU_5051	putative hydrolase	0.891107	9.92363e-05	0.689886	0.000977573	0.64789	0.00224118	0.650316	0.00211774	-0.243217	0.375034	-0.0395691	0.998188
PFLU_3318	putative phosphate-binding periplasmic protein	5.36816	7.11603e-11	4.34716	9.19377e-10	5.12514	1.63261e-10	3.98715	4.29918e-09	-0.243021	0.532807	-0.360015	0.990668
PFLU_1572	putative lipoprotein releasing system, membrane protein	0.489887	0.00157394	0.268931	0.0531046	0.246877	0.0848444	0.284383	0.0469836	-0.24301	0.25508	0.0154521	0.998188
PFLU_0492	thiC, thiamine biosynthesis protein	0.927967	0.000188094	0.675149	0.00266243	0.685025	0.00302591	0.724875	0.00185151	-0.242942	0.434901	0.0497259	0.998188
PFLU_3820	NADH dehydrogenase I chain C/D	0.928379	4.20034e-06	0.756219	3.46979e-05	0.685916	0.000124686	0.698581	8.75348e-05	-0.242463	0.286894	-0.0576378	0.998188
PFLU_1866	conserved hypothetical protein	2.08288	2.91447e-08	2.01288	3.44992e-08	1.84053	2.02721e-07	2.19898	1.42618e-08	-0.242348	0.407128	0.186105	0.998188
PFLU_0025	putative ABC transport system, permease	-0.0480346	0.833456	-0.377693	0.0756669	-0.290106	0.191306	-0.769504	0.0022262	-0.242071	0.465701	-0.39181	0.91064
PFLU_2649	putative LysR-family transcriptional regulator	-0.0860671	0.651119	0.22569	0.208222	-0.328086	0.0851273	0.064009	0.735903	-0.242019	0.395824	-0.161681	0.998188
PFLU_5783	conserved hypothetical protein	1.08279	2.01263e-05	1.13997	9.28607e-06	0.840986	0.000366559	0.877468	0.000229655	-0.241801	0.390329	-0.262503	0.990668
PFLU_1253	putative exported protein	-0.925393	3.8615e-06	-1.69009	1.76238e-09	-1.16712	3.05924e-07	-1.75358	1.57642e-09	-0.241727	0.290222	-0.0634892	0.998188
PFLU_1529	putative protease	0.927603	1.52196e-05	1.09303	1.8781e-06	0.686248	0.000402118	0.86936	3.25395e-05	-0.241355	0.326159	-0.223666	0.990668
PFLU_3775	putative membrane protein	-1.40359	8.98009e-07	-1.26209	2.49848e-06	-1.64492	2.33827e-07	-0.960564	7.3073e-05	-0.241337	0.444981	0.301523	0.989476
PFLU_5352	putative transport-related membrane protein	-1.01951	7.54818e-06	-1.76258	7.83033e-09	-1.26078	7.61874e-07	-1.58859	3.61698e-08	-0.241264	0.360137	0.173997	0.998188
PFLU_1697	putative ABC transport system, permease	0.516829	0.000425059	0.543338	0.000234811	0.275579	0.0356697	0.519895	0.000424298	-0.241251	0.217367	-0.023443	0.998188
PFLU_4941	putative transmembrane protein	1.02854	2.9205e-05	1.35775	8.80485e-07	0.787554	0.000592703	1.33449	1.60454e-06	-0.240989	0.380011	-0.0232608	0.998188
PFLU_3051.1	hypothetical protein	-0.0888717	0.60651	-0.241343	0.142513	-0.329209	0.0593382	-0.643308	0.00113333	-0.240338	0.350031	-0.401965	0.703454
PFLU_4443	putative two-component system, response regulator nitrogen regulation protein NR(I)	-2.5313	1.2e-11	-2.93396	1.46836e-12	-2.77149	5.63052e-12	-3.01503	1.32414e-12	-0.240192	0.276909	-0.0810751	0.998188
PFLU_5756	putative holliday junction resolvase	0.726414	0.00167907	0.575902	0.00828827	0.486403	0.0283393	0.453286	0.0394638	-0.24001	0.430434	-0.122616	0.998188
PFLU_5546	conserved hypothetical protein	1.31502	3.67585e-07	1.57233	2.90384e-08	1.07515	5.28526e-06	1.4225	1.34202e-07	-0.239872	0.33604	-0.149833	0.998188
PFLU_5936	argH, argininosuccinate lyase	0.344054	0.0252283	0.244439	0.0976104	0.104251	0.499247	0.207516	0.162313	-0.239804	0.305669	-0.0369237	0.998188
PFLU_6070	oadA, oxaloacetate decarboxylase alpha chain	0.298882	0.0847898	0.265776	0.117615	0.0592196	0.749163	0.317338	0.0664756	-0.239662	0.371721	0.051562	0.998188
PFLU_4964	phosphogluconate dehydratase	0.244917	0.256884	0.189244	0.374498	0.00538157	0.980709	0.123706	0.57163	-0.239535	0.478975	-0.065538	0.998188
PFLU_0002	dnaN, DNA polymerase III, beta chain	0.860551	1.73923e-05	0.76067	5.54093e-05	0.621058	0.000511772	0.640316	0.000338038	-0.239493	0.313149	-0.120354	0.998188
PFLU_5983	coaBC, coenzyme A biosynthesis bifunctional protein	-1.05765	4.19636e-07	-1.00569	6.22012e-07	-1.29693	4.08282e-08	-1.20818	7.5993e-08	-0.23928	0.270893	-0.202483	0.990668
PFLU_2665	precorrin-4 C11-methyltransferase	0.677456	0.00312529	0.970654	0.000111026	0.438201	0.0482875	1.02862	8.51148e-05	-0.239254	0.437871	0.0579705	0.998188
PFLU_3366	putative glucanotransferase	-0.359719	0.057695	-0.430605	0.0235819	-0.598841	0.00366051	-0.19823	0.285596	-0.239122	0.415138	0.232375	0.998188
PFLU_1562	nagZ, beta-hexosaminidase	0.72658	0.00110573	0.708296	0.00122415	0.487595	0.0212194	0.492058	0.0200117	-0.238985	0.412915	-0.216238	0.998188
PFLU_0418	putative LysR-family regulatory protein	0.704001	0.0596297	0.595013	0.104685	0.465293	0.236019	0.598272	0.127311	-0.238708	0.653668	0.00325836	0.998705
PFLU_4795	histidine kinase inhibitor antagonist	-1.34602	3.13545e-06	-1.82895	7.304e-08	-1.58449	7.8434e-07	-2.02898	4.69607e-08	-0.238474	0.478975	-0.200035	0.998188
PFLU_3103	conserved hypothetical protein	0.638581	0.00124786	0.247863	0.15939	0.400192	0.0338179	0.415962	0.0278377	-0.238389	0.355587	0.168098	0.998188
PFLU_2562	putative ferric siderophore receptor	0.244066	0.745497	1.93268	0.00800239	0.0059715	0.993589	0.227783	0.763704	-0.238095	0.854184	-1.7049	0.616112
PFLU_0020	conserved SMF-related protein	-1.67409	1.05129e-08	-1.80415	3.00538e-09	-1.91216	2.80439e-09	-1.68416	9.87551e-09	-0.238065	0.353945	0.119988	0.998188
PFLU_5970	conserved hypothetical protein	0.29561	0.290677	0.702103	0.0131668	0.0576478	0.856147	0.77782	0.00923767	-0.237962	0.578444	0.0757164	0.998188
PFLU_5514	rpsN, 30S ribosomal protein S14	2.11439	1.2316e-07	2.00312	1.84042e-07	1.87644	5.94928e-07	2.30163	3.67102e-08	-0.237947	0.522672	0.298508	0.998188
PFLU_3385	conserved hypothetical protein	-0.457829	0.0502352	-0.747714	0.00286514	-0.695499	0.00658292	-0.636924	0.0110982	-0.23767	0.519858	0.110789	0.998188
PFLU_2561	conserved hypothetical protein	-0.415936	0.714793	2.45352	0.019821	-0.653555	0.579766	-0.61141	0.604104	-0.237619	0.906436	-3.06493	0.495992
PFLU_3332	short chain dehydrogenase	0.609072	0.0208788	0.427252	0.0920771	0.371521	0.163511	0.329322	0.216585	-0.237552	0.531338	-0.0979303	0.998188
PFLU_5044	inosine-5-monophosphate dehydrogenase	2.39478	6.64168e-10	2.72763	9.872e-11	2.15727	2.8626e-09	2.61604	1.79688e-10	-0.23751	0.387874	-0.111591	0.998188
PFLU_2750	multidrug efflux system transmembrane protein	0.31967	0.0648499	0.568655	0.00219378	0.0827104	0.649874	0.289372	0.0975193	-0.236959	0.365748	-0.279283	0.932738
PFLU_3506	conserved hypothetical protein	0.766466	1.38477e-05	0.483138	0.00114415	0.529578	0.000658618	0.337488	0.0158056	-0.236888	0.250253	-0.14565	0.998188
PFLU_1768	hypothetical protein	0.786363	0.0196789	0.326689	0.321245	0.549507	0.113142	0.428315	0.220864	-0.236856	0.61806	0.101626	0.998188
PFLU_4846	maltose-binding protein	0.457741	0.0229344	-0.532179	0.00902353	0.220952	0.259871	-0.530567	0.00957411	-0.236788	0.437871	0.00161173	0.998705
PFLU_3248	hypothetical protein	-0.296269	0.108222	-1.3196	1.26351e-06	-0.532629	0.00841487	-0.960485	6.97896e-05	-0.236361	0.41296	0.359115	0.871694
PFLU_4929	putative two-component system, sensor kinase	0.0945009	0.538601	-0.0374945	0.805175	-0.141499	0.361969	-0.0557858	0.720002	-0.236	0.313149	-0.0182913	0.998188
PFLU_1868	putative ABC transport system, ATP-binding protein	1.64382	7.68327e-08	1.37274	5.97177e-07	1.40797	6.98097e-07	1.43541	4.54627e-07	-0.235843	0.374985	0.0626696	0.998188
PFLU_0767	ribF, riboflavin biosynthesis protein	1.75139	8.74097e-08	2.05508	8.15352e-09	1.51557	6.74209e-07	1.96127	1.85431e-08	-0.235814	0.414439	-0.093814	0.998188
PFLU_1759	ccmB, cytochrome C biogenesis, heme exporter protein B	-1.43825	1.79371e-08	-1.71041	1.49404e-09	-1.67386	4.18044e-09	-1.77346	1.73402e-09	-0.235614	0.317143	-0.0630525	0.998188
PFLU_6057	aspA, aspartate ammonia-lyase	1.95199	5.10859e-05	2.25159	9.28607e-06	1.71647	0.000208907	1.72879	0.000171571	-0.235518	0.684294	-0.522801	0.990668
PFLU_0765	rpsT, 30S ribosomal protein S20	3.09076	8.47047e-10	3.35209	2.23787e-10	2.85543	2.57599e-09	3.35834	2.51659e-10	-0.235336	0.503565	0.00625203	0.998391
PFLU_3355	conserved hypothetical protein	0.322043	0.115546	0.446035	0.0299287	0.0868624	0.696875	0.280255	0.182597	-0.23518	0.443615	-0.16578	0.998188
PFLU_4678	putative electron transport protein	0.894723	1.13624e-05	1.15239	4.66779e-07	0.659602	0.000303249	1.09026	1.05206e-06	-0.235122	0.318585	-0.062131	0.998188
PFLU_0779	putative lipoprotein	1.65857	7.12155e-09	1.3823	5.63816e-08	1.42388	5.8438e-08	1.27252	1.91442e-07	-0.234691	0.316567	-0.109788	0.998188
PFLU_4143	phenylalanyl-tRNA synthetase beta chain	0.611002	9.29434e-05	0.285587	0.0266434	0.376416	0.00606468	0.243011	0.0572862	-0.234586	0.240727	-0.0425757	0.998188
PFLU_0274	putative ATP-dependent DNA helicase	0.104548	0.566266	0.393027	0.0271451	-0.129777	0.491221	0.33975	0.061885	-0.234325	0.385012	-0.0532771	0.998188
PFLU_4675	conserved hypothetical protein	0.364978	0.153495	0.315842	0.209526	0.130705	0.636368	0.0964359	0.727713	-0.234273	0.544535	-0.219406	0.998188
PFLU_4080	general secretion pathway protein	0.508339	0.105124	1.51407	4.65358e-05	0.274235	0.412583	1.3277	0.000281816	-0.234104	0.617434	-0.186372	0.998188
PFLU_3052	hypothetical protein	0.169993	0.558458	0.834804	0.00422082	-0.0640839	0.843726	0.575791	0.0496448	-0.234077	0.592223	-0.259013	0.998188
PFLU_0858	putative Na+/Ca+ exchanger membrane protein	0.993736	0.000117362	0.752727	0.00139278	0.759735	0.00187672	0.653203	0.0059393	-0.234001	0.437871	-0.0995236	0.998188
PFLU_4158	putative ribose transport system, permease protein	0.108373	0.601242	0.00860269	0.965802	-0.125501	0.553665	-0.149282	0.470121	-0.233874	0.449412	-0.157885	0.998188
PFLU_0505	psd, phosphatidylserine decarboxylase proenzyme	0.132464	0.391583	0.121812	0.42109	-0.101304	0.527639	-0.0548469	0.729604	-0.233768	0.325191	-0.176659	0.998188
PFLU_6111	conserved hypothetical protein	0.334761	0.0444026	-0.26056	0.109617	0.101088	0.556353	-0.384465	0.0265385	-0.233672	0.352792	-0.123905	0.998188
PFLU_4859	putative exported protein	-1.33299	5.52561e-07	-1.3808	2.87168e-07	-1.5666	1.07359e-07	-1.5822	8.00648e-08	-0.233613	0.406286	-0.2014	0.998188
PFLU_5996	conserved hypothetical protein	1.7112	9.82925e-09	1.94249	1.29609e-09	1.47814	8.38006e-08	1.79963	4.8101e-09	-0.233066	0.323925	-0.142865	0.998188
PFLU_4918	conserved hypothetical protein	2.73611	2.76264e-09	2.93222	7.6786e-10	2.5031	1.19649e-08	2.95544	9.17674e-10	-0.233017	0.449412	0.0232224	0.998188
PFLU_1438	putative methyl-accepting chemotaxis protein	0.462721	0.0348214	-0.873414	0.00050828	0.230477	0.292595	-0.9455	0.000362341	-0.232245	0.482346	-0.0720863	0.998188
PFLU_2655	putative transcriptional regulator	-0.838437	0.017444	-0.776669	0.0241035	-1.07036	0.00507071	-0.0758597	0.827563	-0.231922	0.684629	0.700809	0.753112
PFLU_5714	putative lipoprotein	0.766643	0.00151142	0.833844	0.00065711	0.534744	0.0211482	0.687363	0.00430592	-0.231899	0.467527	-0.14648	0.998188
PFLU_0868	putative conserved exported protein	-0.547063	0.00159961	-1.18905	4.39286e-07	-0.778824	7.59907e-05	-1.06632	2.09289e-06	-0.231762	0.343846	0.122735	0.998188
PFLU_1205	putaive NADH oxidoreductase	-2.51815	3.77212e-10	-3.52806	5.64611e-12	-2.74973	1.58341e-10	-3.52718	6.33581e-12	-0.231586	0.415508	0.000881822	0.998705
PFLU_4751	putative succinylglutamate desuccinylase	-0.175022	0.194718	-0.588864	0.000225394	-0.406591	0.0058706	-0.493966	0.0013038	-0.23157	0.276909	0.0948974	0.998188
PFLU_5389	hrpB, ATP-dependent RNA helicase	0.764149	0.000724872	1.08219	1.88531e-05	0.532591	0.0125799	0.964965	8.80437e-05	-0.231559	0.43056	-0.117227	0.998188
PFLU_0880	ptsN, phosphotransferase enzyme IIA component	0.516797	0.00745624	0.0793611	0.663324	0.285353	0.123337	-0.0837106	0.655111	-0.231444	0.409619	-0.163072	0.998188
PFLU_0780	rluD, ribosomal large subunit pseudouridine synthase D	1.97731	2.18965e-08	2.06874	8.88925e-09	1.74605	1.31201e-07	1.90436	3.27193e-08	-0.231258	0.423393	-0.164386	0.998188
PFLU_4404	putative response regulator	-0.450728	0.00887556	-0.537303	0.002417	-0.681794	0.000499769	-0.515928	0.0043236	-0.231065	0.367675	0.0213751	0.998188
PFLU_4373	putative aspartyl aminopeptidase	0.13131	0.381866	-0.157826	0.283514	-0.0997098	0.523268	-0.367144	0.0203822	-0.231019	0.317143	-0.209318	0.990972
PFLU_4415	chemotaxis protein CheZ	-4.01442	4.98871e-12	-5.08335	4.16276e-13	-4.24539	3.64454e-12	-5.03603	5.52553e-13	-0.23097	0.450128	0.0473211	0.998188
PFLU_2662	5-Methyltetrahydrofolate--homocysteine methyltransferase	0.926695	9.92405e-05	1.20881	4.65125e-06	0.696084	0.0014726	1.27074	2.9107e-06	-0.230611	0.437871	0.0619256	0.998188
PFLU_2681	putative aminopeptidase N	0.67287	0.000157647	0.502546	0.00186226	0.442262	0.0057141	0.355046	0.0200678	-0.230608	0.314733	-0.1475	0.998188
PFLU_5006	homoserine dehydrogenase	0.97244	1.68929e-06	0.879294	4.5687e-06	0.741912	4.28728e-05	0.752488	3.12781e-05	-0.230527	0.289074	-0.126806	0.998188
PFLU_2074	putative transferase	-1.86013	1.94627e-08	-3.27783	2.1126e-11	-2.09019	7.13339e-09	-3.22067	5.85444e-11	-0.230063	0.454197	0.0571568	0.998188
PFLU_5219	acetolactate synthase isozyme III small subunit	1.8408	3.96289e-08	1.86215	2.53929e-08	1.61087	2.52516e-07	1.7515	6.67797e-08	-0.229934	0.424864	-0.110651	0.998188
PFLU_2753	putative EAL/GGDEF domain signalling protein	0.179011	0.553199	0.652661	0.0255891	-0.0507783	0.878829	0.749643	0.0153546	-0.229789	0.617434	0.0969822	0.998188
PFLU_4915	crossover junction endodeoxyribonuclease	-0.528272	0.00574183	-0.754993	0.000306342	-0.757861	0.000473045	-0.69079	0.00101253	-0.229588	0.417616	0.0642035	0.998188
PFLU_6002	putative oxidative stress LysR-family regulatory protein	0.262978	0.114334	0.073036	0.66089	0.0334359	0.85456	-0.101629	0.553058	-0.229542	0.367957	-0.174665	0.998188
PFLU_4046	putative oligopeptide ABC transporter integral membrane protein	-0.191406	0.387375	-0.88007	0.000522973	-0.420913	0.0634675	-0.556137	0.0166014	-0.229507	0.506994	0.323932	0.990668
PFLU_4033	conserved hypothetical protein	-1.12475	4.86453e-06	-1.35099	4.74146e-07	-1.35422	7.8434e-07	-1.13732	5.00067e-06	-0.229471	0.419693	0.213666	0.998188
PFLU_1472	putative peptidase	1.44585	2.85051e-09	1.48625	1.41438e-09	1.21664	3.16004e-08	1.39942	3.74867e-09	-0.229206	0.238866	-0.0868311	0.998188
PFLU_1848	putative membrane protein	-0.907657	6.79342e-06	-1.51358	1.07335e-08	-1.13665	6.4019e-07	-1.51492	1.55497e-08	-0.228995	0.329345	-0.00134267	0.998705
PFLU_5446	dedA, membrane-related protein DedA	1.37651	1.16953e-06	1.42146	6.34085e-07	1.14754	1.36473e-05	1.23913	4.90685e-06	-0.228969	0.409522	-0.182328	0.998188
PFLU_3867	putative pH adaptation potassium efflux protein	1.27235	0.00882967	0.649066	0.172875	1.0435	0.0373594	0.601995	0.248501	-0.228852	0.713204	-0.0470701	0.998188
PFLU_2369	conserved hypothetical protein	0.595269	0.0144361	0.831018	0.00126664	0.366447	0.124252	0.697295	0.00555246	-0.228823	0.525574	-0.133723	0.998188
PFLU_5206	putative LysR-family regulatory protein	0.112919	0.432101	0.00394696	0.978007	-0.115735	0.437498	-0.0822316	0.580464	-0.228654	0.296956	-0.0861786	0.998188
PFLU_3649	putative peptidase	-0.443491	0.0116594	-0.62177	0.000936334	-0.671927	0.00062668	-0.775127	0.000153938	-0.228436	0.383798	-0.153356	0.998188
PFLU_1500	putative LysR-family regulatory protein	0.944235	0.00010559	1.35358	1.51166e-06	0.715899	0.00165737	1.2043	8.11525e-06	-0.228336	0.435863	-0.149283	0.998188
PFLU_0466	putative lipopolysaccharide core biosynthesis protein	0.336353	0.156471	0.2412	0.303571	0.108114	0.677824	0.335482	0.172903	-0.228239	0.523743	0.0942824	0.998188
PFLU_2726	putative exported protein	-1.78772	1.28971e-08	-2.75189	5.962e-11	-2.01583	4.67294e-09	-3.16861	3.10816e-11	-0.228104	0.424282	-0.416722	0.816683
PFLU_5213	exodeoxyribonuclease V beta chain	0.147952	0.304869	-0.135632	0.340067	-0.0801433	0.594755	-0.166075	0.252155	-0.228096	0.309686	-0.0304422	0.998188
PFLU_5305	putative plasmid partitioning protein	-0.799658	0.00175793	-0.265283	0.238435	-1.0276	0.000216655	-0.359602	0.112985	-0.227939	0.533456	-0.094319	0.998188
PFLU_5348	putative dehydrogenase	0.959252	0.00337882	1.24741	0.000347819	0.731333	0.0197478	1.44149	9.55854e-05	-0.227919	0.633159	0.194086	0.998188
PFLU_5311	conserved hypothetical protein	-0.868729	0.000555941	-1.46617	2.29787e-06	-1.09632	7.94334e-05	-1.51852	2.23269e-06	-0.227591	0.514383	-0.0523485	0.998188
PFLU_2787	heme uptake regulator	-1.24204	0.000190377	-0.327082	0.209956	-1.46938	7.89927e-05	-0.785544	0.00944435	-0.227339	0.639527	-0.458462	0.933597
PFLU_5200	conserved hypothetical protein	1.80527	0.000856902	1.92475	0.000399046	1.57824	0.00415621	2.1819	0.000169443	-0.227035	0.706822	0.257144	0.998188
PFLU_2637	putative oligopeptide transport protein (ABC superfamily, membrane)	0.6085	0.0163594	0.484274	0.0478028	0.382004	0.137353	0.470083	0.0685885	-0.226496	0.525727	-0.0141915	0.998391
PFLU_4676	electron transfer flavoprotein alpha-subunit	0.449724	0.00208899	0.346373	0.0114299	0.223423	0.0952762	0.242895	0.0666496	-0.226301	0.276909	-0.103477	0.998188
PFLU_2371	putative calcium-binding protein	1.28791	6.75983e-05	1.72396	2.14228e-06	1.06167	0.000533148	1.66341	3.99052e-06	-0.226242	0.563281	-0.0605447	0.998188
PFLU_3763	hypothetical protein	-0.641522	0.00937927	-0.810641	0.00169771	-0.86758	0.00163709	-0.774831	0.0037619	-0.226058	0.557061	0.0358096	0.998188
PFLU_2468	putative membrane protein	-0.620153	0.108378	-0.258551	0.483482	-0.846168	0.0501059	-0.173283	0.673327	-0.226015	0.740087	0.085268	0.998188
PFLU_5731	putative D-amino acid dehydrogenase small subunit	-2.78023	1.03263e-07	-2.76861	8.27334e-08	-3.00605	5.09575e-08	-2.90705	5.70232e-08	-0.225823	0.655835	-0.138433	0.998188
PFLU_5869	putative membrane protein	-0.191041	0.268269	-0.390134	0.0266293	-0.416845	0.0247505	-0.246769	0.164915	-0.225805	0.400237	0.143365	0.998188
PFLU_0008	putative phospholipid biosynthesis-related acyltransferase	-0.579263	0.00973022	-0.792816	0.000918558	-0.805039	0.00120145	-0.795751	0.00126303	-0.225776	0.505767	-0.00293455	0.998705
PFLU_5038	maltoporin	-6.16373	2.94842e-11	-4.90304	1.52534e-10	-6.38945	3.28857e-11	-5.05661	1.63756e-10	-0.225724	0.738388	-0.15357	0.998188
PFLU_4157	putative ribose operon repressor	0.313716	0.114649	0.187628	0.338008	0.0881465	0.677253	0.196764	0.329194	-0.22557	0.459419	0.0091361	0.998391
PFLU_2301	xylA, xylose isomerase	1.919	7.43068e-08	1.20285	1.46862e-05	1.69354	3.79017e-07	1.20204	1.68797e-05	-0.225453	0.486612	-0.000808075	0.998705
PFLU_4974	conserved hypothetical protein	-0.928023	0.000475828	-1.17706	4.32701e-05	-1.15338	8.99855e-05	-1.16118	8.22473e-05	-0.22536	0.547896	0.0158827	0.998391
PFLU_4616	zinc transport protein	0.186387	0.362928	0.132208	0.513359	-0.0385143	0.863127	-0.0365294	0.864085	-0.224901	0.476359	-0.168737	0.998188
PFLU_0763A	conserved hypothetical protein	0.634222	0.0191651	0.617626	0.020541	0.409554	0.13934	0.605099	0.0307029	-0.224668	0.560471	-0.0125272	0.998391
PFLU_5778	putative cell division-related membrane protein	-0.00131442	0.993941	-0.0284399	0.856225	-0.225956	0.155796	-0.0815769	0.609932	-0.224641	0.355587	-0.053137	0.998188
PFLU_4961	putative two-component sensor histidine kinase transcriptional regulatory protein	-0.415843	0.0140127	-0.847482	3.77858e-05	-0.640334	0.00085971	-0.7193	0.000316613	-0.224491	0.378853	0.128182	0.998188
PFLU_5327	conserved hypothetical ABC transport, membrane protein	-0.216308	0.103359	-0.418841	0.00322234	-0.440767	0.00258758	-0.564561	0.000281601	-0.224459	0.282336	-0.14572	0.998188
PFLU_5834	conserved hypothetical protein	-0.356443	0.0934049	-0.637074	0.00495051	-0.580881	0.0126326	-0.531386	0.0207431	-0.224438	0.504057	0.105688	0.998188
PFLU_1281	fabZ, (3R)-hydroxymyristoyl-[acyl carrier protein] dehydratase	-0.540129	0.00694558	-0.777522	0.000370503	-0.764415	0.000646695	-0.810383	0.000365239	-0.224285	0.453183	-0.0328618	0.998188
PFLU_3370	conserved hypothetical protein	0.410292	0.156243	0.458378	0.108122	0.186267	0.535652	0.55117	0.0592919	-0.224026	0.628694	0.0927919	0.998188
PFLU_1162	putativ ATP-binding protein	0.881583	3.61303e-05	0.806218	8.01306e-05	0.657582	0.000792136	0.72377	0.000306794	-0.224001	0.368895	-0.0824488	0.998188
PFLU_5414	putative lipoprotein	1.09007	1.8199e-06	1.11314	1.14713e-06	0.866307	3.28453e-05	1.0323	3.80235e-06	-0.223766	0.343216	-0.0808416	0.998188
PFLU_1115	putative two-component system, response regulator	-0.184876	0.178652	-0.689963	5.52461e-05	-0.408404	0.00637878	-0.635529	0.000159275	-0.223528	0.30137	0.0544336	0.998188
PFLU_5263	conserved hypothetical membrane protein	1.24634	1.03217e-05	1.06616	5.10766e-05	1.02314	0.000129321	1.33812	5.51769e-06	-0.223197	0.45431	0.271956	0.990668
PFLU_0574	putative chaperone/heat shock protein	0.508547	0.0265453	0.722429	0.00257383	0.285371	0.223645	0.839215	0.00106268	-0.223176	0.498645	0.116785	0.998188
PFLU_0318	putative transport-related membrane protein	0.210334	0.320513	0.152484	0.467397	-0.0128265	0.957321	0.217399	0.323719	-0.22316	0.482346	0.0649145	0.998188
PFLU_5893	glpT, glycerol-3-phosphate transporter	-0.262381	0.208396	-0.168329	0.413606	-0.485528	0.0276483	-0.20254	0.336844	-0.223147	0.498421	-0.0342109	0.998188
PFLU_4579	putative exported protein	-1.55124	2.41849e-07	-2.42353	9.06637e-10	-1.77428	7.57745e-08	-2.41656	1.96665e-09	-0.223033	0.476829	0.00697152	0.998391
PFLU_5224	conserved hypothetical protein	0.389346	0.01332	0.478888	0.00307286	0.166553	0.274755	0.40244	0.0109535	-0.222793	0.337791	-0.0764474	0.998188
PFLU_0999	estB, carboxylesterase 2	0.913791	0.000817172	1.08785	0.000138852	0.691005	0.00858364	0.715611	0.006741	-0.222786	0.527582	-0.372235	0.933597
PFLU_5408	lnt, apolipoprotein N-acyltransferase	0.611413	0.00309181	0.360635	0.0567233	0.388679	0.0489142	0.347494	0.0738673	-0.222734	0.435863	-0.0131412	0.998391
PFLU_4105	conserved hypothetical protein	-0.517495	0.015803	-0.531978	0.0124428	-0.739981	0.00216895	-0.318151	0.135185	-0.222486	0.499596	0.213827	0.998188
PFLU_5435	conserved hypothetical lipoprotein	0.255797	0.150914	0.149497	0.395094	0.033484	0.863126	0.0323306	0.861536	-0.222313	0.419888	-0.117167	0.998188
PFLU_0946	ftsW, cell division protein	-1.09353	1.99798e-05	-1.89589	2.59373e-08	-1.31583	3.26915e-06	-2.24795	5.43333e-09	-0.222297	0.477845	-0.352063	0.93038
PFLU_2928	hypothetical protein	-1.13452	0.00159049	-1.00366	0.00342654	-1.35655	0.000773136	-1.32744	0.0010621	-0.222027	0.704977	-0.323784	0.998188
PFLU_2549	putative aminotransferase	-0.929424	0.0112034	-0.226555	0.491778	-1.15123	0.00499297	-0.144573	0.688007	-0.221802	0.72225	0.0819828	0.998188
PFLU_1403	conserved hypothetical protein	0.339389	0.0560714	0.654735	0.000819105	0.117798	0.525559	0.648904	0.00114298	-0.22159	0.403765	-0.00583128	0.998391
PFLU_1503	putative acetolactate synthase large subunit	-0.287247	0.162267	-0.0171113	0.933221	-0.508273	0.0234601	-0.148628	0.49002	-0.221026	0.49352	-0.131517	0.998188
PFLU_4803	conserved hypothetical protein	-1.03386	9.04625e-05	-1.24857	1.04787e-05	-1.25486	1.43593e-05	-1.39005	4.05895e-06	-0.220998	0.517447	-0.141479	0.998188
PFLU_4653	conserved hypothetical protein	0.374005	0.0139259	0.323074	0.0283449	0.153016	0.304849	0.249291	0.0912068	-0.220989	0.324481	-0.0737831	0.998188
PFLU_3816	conserved hypothetical protein	-2.31833	2.04129e-11	-2.90498	1.16323e-12	-2.53925	1.18092e-11	-2.69886	4.28464e-12	-0.22092	0.326927	0.206119	0.992665
PFLU_2775	conserved hypothetical protein	0.222904	0.288056	0.167831	0.418417	0.00238721	0.991433	0.210137	0.330059	-0.220517	0.489882	0.0423058	0.998188
PFLU_1400	conserved hypothetical protein	-0.788582	8.75483e-05	-1.50858	4.08268e-08	-1.00895	7.62236e-06	-1.45706	8.66646e-08	-0.220367	0.39125	0.0515211	0.998188
PFLU_2373	araG, L-arabinose ABC transport system, ATP-binding protein	0.417866	0.159012	0.64679	0.0309222	0.197698	0.521262	0.516113	0.0839169	-0.220168	0.642093	-0.130677	0.998188
PFLU_3857	conserved hypothetical protein	-0.21362	0.71417	1.13087	0.0233518	-0.433609	0.490259	1.1738	0.0276252	-0.219989	0.824921	0.0429345	0.998391
PFLU_0919	putative ribosomal RNA small subunit methyltransferase C	0.049325	0.799525	0.305227	0.0893952	-0.170552	0.371966	-0.0026241	0.989763	-0.219877	0.435505	-0.307851	0.923089
PFLU_2695	sigma-54 interacting regulatory protein	-0.69337	0.000102875	-1.33159	4.40917e-08	-0.913038	6.12063e-06	-1.3629	3.99102e-08	-0.219667	0.336521	-0.0313073	0.998188
PFLU_4904	putative transcriptional regulatory protein	1.27962	1.84968e-06	1.54742	1.30745e-07	1.05997	2.42393e-05	1.31721	1.55641e-06	-0.21965	0.407666	-0.230216	0.992665
PFLU_1343	livG1, high-affinity branched-chain amino acid ABC transport system, ATP-binding protein	0.600081	0.000352979	0.345368	0.0186822	0.380463	0.0129566	0.263598	0.0717295	-0.219617	0.317143	-0.0817697	0.998188
PFLU_1699	putative acyl-CoA thioesterase	1.35701	9.93974e-07	1.59755	9.61734e-08	1.13778	1.10434e-05	1.40901	7.09115e-07	-0.219228	0.413802	-0.18854	0.998188
PFLU_1152	putative alkyl hydroperoxide reductase	3.43734	3.96286e-11	4.11619	3.52282e-12	3.21823	9.45377e-11	4.00236	5.26479e-12	-0.21911	0.471967	-0.113827	0.998188
PFLU_5821	putative hydrolase	0.85069	5.90609e-05	1.20343	8.89219e-07	0.631866	0.00123556	1.10528	3.38066e-06	-0.218824	0.382356	-0.0981575	0.998188
PFLU_0961	putative exported protein	-0.50785	0.012839	-0.0831341	0.665203	-0.726546	0.00154553	-0.0942539	0.641441	-0.218696	0.480464	-0.0111197	0.998391
PFLU_0001	dnaA, chromosomal replication initiator protein DnaA	1.04233	3.55549e-06	1.24689	3.36136e-07	0.823688	5.58599e-05	1.09501	1.85273e-06	-0.218645	0.375956	-0.15188	0.998188
PFLU_2612	conserved hypothetical protein	0.829415	1.78867e-05	0.89465	6.26937e-06	0.610868	0.000447752	0.880081	8.77653e-06	-0.218547	0.336459	-0.0145688	0.998391
PFLU_2228	putative peptide methionine sulfoxide reductase	-0.294002	0.541814	0.267084	0.547166	-0.512537	0.326968	0.444318	0.348446	-0.218535	0.789622	0.177234	0.998188
PFLU_3945	putative TetR-family regulatory protein	-0.644554	0.000105159	-0.868103	3.56165e-06	-0.863056	6.37985e-06	-0.907894	3.29688e-06	-0.218502	0.312823	-0.0397918	0.998188
PFLU_2410	putative dehydrogenase	-0.600599	0.0048064	-0.560918	0.00693321	-0.81899	0.000450467	-0.544438	0.00900447	-0.218391	0.48285	0.0164805	0.998391
PFLU_3044	putative phage integrase/recombinase	-0.0197409	0.949588	0.283786	0.279635	-0.238037	0.410102	0.587108	0.0344185	-0.218296	0.608552	0.303322	0.998188
PFLU_2694	conserved hypothetical protein	-3.27344	6.88268e-09	-3.02652	1.21526e-08	-3.49136	3.84788e-09	-3.0777	1.1126e-08	-0.217916	0.639428	-0.0511849	0.998188
PFLU_3043	hypothetical protein	-0.688963	2.09306e-05	-0.772189	4.84183e-06	-0.906591	1.15747e-06	-0.801944	4.12973e-06	-0.217628	0.271787	-0.0297548	0.998188
PFLU_1764	dsbE, cytochrome C biogenesis, thiol:disulfide interchange protein	-0.175817	0.495728	-0.746155	0.00651768	-0.393365	0.142054	-0.74032	0.0106985	-0.217548	0.593704	0.00583554	0.998391
PFLU_4035	conserved hypothetical protein	-1.56939	1.00841e-08	-2.65965	1.21928e-11	-1.78679	2.71082e-09	-2.32069	8.8777e-11	-0.217399	0.364896	0.338959	0.739959
PFLU_5473	ribD, riboflavin biosynthesis protein RibD [includes: diaminohydroxyphosphoribosylaminopyrimidine deaminase; 5-amino-6-(5-phosphoribosylamino)uracil reductase]	0.598338	0.00188303	0.432614	0.0155674	0.381357	0.0359426	0.454975	0.0135697	-0.216981	0.409761	0.0223611	0.998188
PFLU_5045	conserved hypothetical protein	1.01576	0.00115635	1.36784	5.16751e-05	0.798936	0.00992718	1.09834	0.000815016	-0.216821	0.582415	-0.269504	0.998188
PFLU_0906	hypothetical protein	1.10847	3.35085e-05	1.35897	2.70625e-06	0.891722	0.0003824	1.28894	6.64763e-06	-0.216752	0.481089	-0.0700283	0.998188
PFLU_4698	putative deoxyribonuclease	0.466272	0.0211539	0.67006	0.0017097	0.250078	0.218142	0.448881	0.0292225	-0.216194	0.463673	-0.221179	0.998188
PFLU_5266	carA, carbamoyl-phosphate synthase small chain	0.845228	2.58128e-05	0.598572	0.000669891	0.629091	0.000533222	0.477999	0.00431415	-0.216137	0.367957	-0.120574	0.998188
PFLU_2449	conserved hypothetical protein	1.10386	0.0170182	1.60595	0.000951052	0.887746	0.062282	1.54851	0.0019154	-0.216114	0.742087	-0.0574462	0.998188
PFLU_5982	radC, DNA repair protein	-1.10104	2.12744e-05	-1.22539	5.60426e-06	-1.31696	5.06982e-06	-1.1768	1.65412e-05	-0.215922	0.510208	0.0485908	0.998188
PFLU_1378	oprM, outer membrane protein precursor	-0.0691058	0.684041	-0.551433	0.00194012	-0.284945	0.0838774	-0.777519	9.66017e-05	-0.21584	0.39637	-0.226085	0.990972
PFLU_2907	conserved hypothetical protein	-0.0135172	0.956682	-0.54334	0.0137055	-0.228936	0.295509	-0.221215	0.308454	-0.215419	0.51333	0.322125	0.990668
PFLU_0739	hemK, protein methyltransferase	1.17779	4.58674e-07	1.45235	2.35584e-08	0.962516	6.99233e-06	1.26993	1.87049e-07	-0.215271	0.337628	-0.182421	0.998188
PFLU_3821	NADH dehydrogenase I chain E	0.881305	1.25181e-05	0.553585	0.00110054	0.666143	0.000276833	0.52798	0.0019306	-0.215162	0.348712	-0.0256047	0.998188
PFLU_3924	putative acetyltransferase	0.610615	0.0575609	1.22894	0.000483999	0.395496	0.239654	0.642967	0.0559336	-0.215118	0.644759	-0.585975	0.753112
PFLU_3912	putative hydrolase	0.175471	0.552175	0.430982	0.122561	-0.0395635	0.905333	0.161223	0.604527	-0.215035	0.624655	-0.26976	0.998188
PFLU_0842	petB, cytochrome B	-0.785914	5.47505e-05	-1.28166	1.58263e-07	-1.00094	4.27511e-06	-1.3012	1.46106e-07	-0.215025	0.375956	-0.0195441	0.998188
PFLU_3750	putative tonB-dependent receptor	-1.3297	9.88201e-06	-0.978147	0.000191177	-1.54468	2.98752e-06	-1.21268	3.49881e-05	-0.21498	0.568949	-0.234537	0.998188
PFLU_4248	hypothetical protein	-0.845638	0.000645422	-1.23195	1.57312e-05	-1.05993	0.000149111	-1.34322	1.69297e-05	-0.214293	0.551474	-0.111266	0.998188
PFLU_6090	putative cation ABC transport system, membrane protein	0.294355	0.436174	0.56473	0.119795	0.0800713	0.851469	0.450868	0.244516	-0.214284	0.713717	-0.113862	0.998188
PFLU_0068	putative D-methionine ABC transport system, substrate-binding protein	0.0212267	0.888075	-0.308355	0.0282927	-0.192996	0.172449	-0.355589	0.0154626	-0.214223	0.320787	-0.0472339	0.998188
PFLU_4708	rpmF, putative 50S ribosomal protein L32	3.76201	2.38011e-08	3.74766	1.85807e-08	3.54805	6.59221e-08	3.67709	3.06684e-08	-0.213954	0.648279	-0.0705712	0.998188
PFLU_5042	putative regulatory protein	0.914316	0.00586302	0.569808	0.0689213	0.70039	0.0361108	0.366938	0.276589	-0.213927	0.631378	-0.20287	0.998188
PFLU_5000	conserved hypothetical protein	1.06604	4.44311e-06	1.15879	1.33306e-06	0.852243	7.32757e-05	1.12905	2.54935e-06	-0.2138	0.382667	-0.0297381	0.998188
PFLU_3392	conserved hypothetical protein	-0.969999	1.80256e-05	-1.61472	3.61702e-08	-1.18378	2.48057e-06	-1.54841	8.64721e-08	-0.213781	0.434901	0.066304	0.998188
PFLU_5759	pyrC, dihydroorotase-like protein	0.530209	0.00371672	0.366747	0.0311192	0.316446	0.0665569	0.274965	0.103829	-0.213763	0.410076	-0.0917817	0.998188
PFLU_4710	conserved hypothetical protein	0.865561	0.000944907	0.983552	0.000256932	0.652112	0.0103773	1.00779	0.000301826	-0.213448	0.521437	0.0242389	0.998188
PFLU_2149	putative lipoprotein	0.023738	0.924883	-0.206603	0.35697	-0.18937	0.427091	0.02679	0.91137	-0.213108	0.546682	0.233393	0.998188
PFLU_4844	ABC transport system, membrane permease	1.3057	2.82372e-06	0.419642	0.0356383	1.09297	2.51652e-05	0.478667	0.0207057	-0.212725	0.47516	0.0590251	0.998188
PFLU_4526	ATP-dependent RNA helicase	0.990091	1.3936e-05	1.18622	1.40623e-06	0.777464	0.000208356	1.09341	4.49656e-06	-0.212626	0.414439	-0.092818	0.998188
PFLU_1580	conserved hypothetical protein	0.142288	0.509172	0.465243	0.0269479	-0.0703348	0.803337	0.224085	0.351214	-0.212623	0.502743	-0.241158	0.998188
PFLU_0206	putative TonB-dependent exported protein	-0.562093	0.0351678	0.423513	0.0835618	-0.774636	0.00947357	0.666202	0.0123814	-0.212543	0.624611	0.242689	0.998188
PFLU_2917	CDP-diacylglycerol-serine O-phosphatidyltransferase	0.686043	0.000518877	0.921019	2.21417e-05	0.47351	0.0108596	0.756229	0.000250077	-0.212533	0.402294	-0.164791	0.998188
PFLU_5015	putative membrane protein	1.51982	4.11384e-06	1.5936	1.91406e-06	1.30739	3.1831e-05	1.47505	7.04434e-06	-0.212429	0.526127	-0.118552	0.998188
PFLU_2169	putative LuxR-family regulatory protein	-0.236323	0.156421	-0.603326	0.00118618	-0.448621	0.0119091	-0.356979	0.0371424	-0.212298	0.415508	0.246346	0.990668
PFLU_0007	putative two-component system, sensor kinase	-0.767697	8.38752e-06	-1.08977	1.02595e-07	-0.979957	6.61807e-07	-1.13821	8.7729e-08	-0.21226	0.296956	-0.0484387	0.998188
PFLU_1233	putative lipoprotein	0.61505	0.00542805	0.380128	0.0647989	0.402946	0.0620721	0.432998	0.0441316	-0.212104	0.495112	0.0528695	0.998188
PFLU_1486	hypothetical protein	-3.32025	4.76385e-09	-3.56272	1.77373e-09	-3.53221	6.73528e-09	-3.69848	4.84463e-09	-0.211968	0.738491	-0.135756	0.998188
PFLU_0879	conserved hypothetical protein	0.272881	0.0871536	-0.220855	0.159023	0.0609541	0.717945	-0.315034	0.052326	-0.211927	0.38813	-0.094179	0.998188
PFLU_0287	putative two-component system, sensor kinase	0.427091	0.023432	0.341284	0.0610065	0.216081	0.250756	0.290608	0.119161	-0.21101	0.446954	-0.0506763	0.998188
PFLU_1262	putative post-transcriptional cysteine desulfuration regulatory protein	0.270032	0.408201	0.450843	0.15238	0.0590329	0.873986	0.545737	0.103573	-0.210999	0.668061	0.0948938	0.998188
PFLU_6059	putative L-asparaginase	1.05432	8.38752e-06	1.20274	1.41436e-06	0.843562	0.000134783	0.944143	3.74101e-05	-0.21076	0.405697	-0.258594	0.9669
PFLU_5472	ribE, riboflavin synthase alpha chain	1.57904	1.39234e-07	1.69398	4.36329e-08	1.36871	1.0727e-06	1.54515	1.89337e-07	-0.210325	0.434901	-0.148836	0.998188
PFLU_3431	putative membrane protein	1.73216	6.85592e-05	1.55555	0.000179531	1.52204	0.000309392	1.94749	2.07595e-05	-0.210118	0.677919	0.39194	0.998188
PFLU_4611	putative uroporphyrin-III c-methyltransferase	1.55032	0.00126728	1.29937	0.00462398	1.34021	0.00493853	1.56989	0.00135832	-0.210111	0.743449	0.270522	0.998188
PFLU_4008	putative LuxR-family regulatory protein	-0.917893	0.000402315	-1.46633	3.01427e-06	-1.12794	8.56828e-05	-1.47708	5.40854e-06	-0.210046	0.568949	-0.0107481	0.998391
PFLU_4760	putative AraC family regulatory protein	0.320785	0.0473295	-0.0359331	0.823974	0.110944	0.503981	0.0664095	0.687611	-0.209841	0.392002	0.102343	0.998188
PFLU_3036	putative nucleotide-sugar dehydrogenase	-1.04236	1.82156e-05	-1.8504	1.74891e-08	-1.25188	3.15042e-06	-1.76242	5.18493e-08	-0.209516	0.479946	0.0879778	0.998188
PFLU_4372	ribosomal large subunit pseudouridine synthase A	1.17893	8.15207e-05	1.30148	2.28258e-05	0.969516	0.000796332	1.38661	1.72099e-05	-0.209418	0.538455	0.0851318	0.998188
PFLU_1390	conserved hypothetical protein	1.06873	0.00131099	1.26128	0.000243615	0.859573	0.00963236	1.22993	0.000512599	-0.209154	0.617434	-0.0313515	0.998188
PFLU_4786	putative transferase	-1.39615	7.14714e-07	-1.95836	1.01717e-08	-1.60527	2.53868e-07	-2.10544	1.10052e-08	-0.209123	0.504057	-0.147078	0.998188
PFLU_1870	putative TetR-family regulatory protein	1.0394	0.000400357	1.49306	6.59732e-06	0.830429	0.00369659	1.5108	8.92417e-06	-0.208972	0.566706	0.017743	0.998391
PFLU_0804	putative multiphosphoryl transfer protein, PTS system	1.15925	3.76906e-06	0.572698	0.00308651	0.95028	3.94682e-05	0.563856	0.00386358	-0.208969	0.447296	-0.00884209	0.998391
PFLU_4212	putative aldehyde dehydrogenase	1.7837	0.00868502	2.56361	0.000474261	1.57475	0.020344	2.85634	0.00019719	-0.208945	0.843018	0.292722	0.998188
PFLU_4970	putative membrane protein	-1.29438	0.00068717	-1.03466	0.00323133	-1.5033	0.000424153	-1.0309	0.00649377	-0.208922	0.739896	0.00375426	0.998705
PFLU_2470	putative nucleoside-sepcific transport system, substrate-binding protein	-2.99004	8.31375e-09	-3.3756	1.53871e-09	-3.19882	5.02232e-09	-3.14355	4.8101e-09	-0.208778	0.645534	0.232054	0.998188
PFLU_1074	putative sugar transport-related, membrane protein	-0.470705	0.0843169	0.0182498	0.944898	-0.67932	0.024417	0.00334608	0.990819	-0.208615	0.639428	-0.0149037	0.998391
PFLU_1493	conserved hypothetical protein	0.696579	0.0097506	2.01806	2.45179e-07	0.488005	0.0654634	1.91486	5.62886e-07	-0.208574	0.600607	-0.1032	0.998188
PFLU_0839	rplM, 50S ribosomal protein L13	3.09057	8.13246e-11	3.44526	1.60847e-11	2.88208	2.13846e-10	3.3855	2.16393e-11	-0.208484	0.486288	-0.0597603	0.998188
PFLU_4144	phenylalanyl-tRNA synthetase alpha chain	0.585912	0.00225933	0.32859	0.0584978	0.377453	0.037038	0.191978	0.275333	-0.20846	0.433236	-0.136612	0.998188
PFLU_0730	pth, peptidyl-tRNA hydrolase	0.520439	0.0230158	0.422486	0.0568207	0.312015	0.176384	0.191156	0.408622	-0.208425	0.538439	-0.23133	0.998188
PFLU_1059	lepB, signal peptidase I	-0.207242	0.152706	-0.552965	0.000746123	-0.415553	0.00792225	-0.68153	0.000130745	-0.208311	0.358157	-0.128565	0.998188
PFLU_4985	putative sulfatase	0.720678	0.00427414	0.802415	0.00167687	0.512594	0.0390896	0.798495	0.00245588	-0.208085	0.549856	-0.00391997	0.998391
PFLU_4473	conserved hypothetical protein	0.493976	0.245636	0.908886	0.0290378	0.286218	0.545439	0.596024	0.187209	-0.207758	0.751133	-0.312862	0.998188
PFLU_5438	putative decarboxylase	0.250185	0.13114	0.224017	0.169222	0.0424406	0.815657	0.165907	0.321373	-0.207744	0.415138	-0.0581097	0.998188
PFLU_5898	ubiD, 3-octaprenyl-4-hydroxybenzoate carboxy-lyase	1.00696	2.44973e-06	1.18761	2.62115e-07	0.799729	3.87327e-05	1.05452	1.35148e-06	-0.207226	0.366338	-0.133089	0.998188
PFLU_3149	putative GerE familyregulatory protein	0.936612	0.000524234	1.01179	0.000219002	0.729448	0.00562796	1.22031	4.81906e-05	-0.207165	0.530571	0.208524	0.998188
PFLU_0413	conserved hypothetical protein	0.907296	1.09908e-05	1.17055	4.46285e-07	0.700176	0.000184749	1.10957	9.42614e-07	-0.20712	0.385512	-0.0609828	0.998188
PFLU_4861	putative K(+) transport-related membrane protein	-1.31807	4.4951e-08	-1.97621	2.0736e-10	-1.52499	9.32851e-09	-1.94864	3.86677e-10	-0.206912	0.361022	0.027569	0.998188
PFLU_5107	putative colicin-E3 immunity protein	-0.861432	0.014534	-0.71012	0.0343068	-1.06803	0.00740535	-0.887053	0.0224591	-0.2066	0.755472	-0.176933	0.998188
PFLU_1713	conserved hypothetical protein	0.708957	0.000418441	1.20513	9.96314e-07	0.502362	0.00815615	0.931397	3.16012e-05	-0.206595	0.415138	-0.273737	0.922796
PFLU_4426	flagellar protein FliO	-3.57207	1.09081e-11	-4.38702	9.62507e-13	-3.77861	8.29257e-12	-4.39343	1.45298e-12	-0.206532	0.512879	-0.0064112	0.998391
PFLU_6071	accC, biotin carboxylase	0.495286	0.00611091	0.630329	0.000882116	0.288877	0.0923571	0.707431	0.000342773	-0.206409	0.43121	0.0771025	0.998188
PFLU_0142	putative membrane protein	-1.32975	4.19581e-08	-2.13508	8.26775e-11	-1.53608	7.64816e-09	-2.12825	1.00166e-10	-0.206328	0.355587	0.00683464	0.998391
PFLU_4051	conserved hypothetical protein	-0.0818618	0.770504	-0.587987	0.0330149	-0.28778	0.307304	-0.279798	0.320878	-0.205919	0.628159	0.308189	0.998188
PFLU_1180	putative phage hypothetical protein	0.268645	0.520225	0.377564	0.34765	0.062752	0.893132	-0.113849	0.804469	-0.205894	0.756582	-0.491413	0.998188
PFLU_1838	putative exported protein	-0.643623	0.0113063	-0.79306	0.0026498	-0.849342	0.00278455	-0.631918	0.0177698	-0.20572	0.609978	0.161142	0.998188
PFLU_0948	murC, UDP-N-acetylmuramate--L-alanine ligase	-1.65395	8.93112e-08	-2.47905	4.64827e-10	-1.85953	2.46892e-08	-2.79257	1.42033e-10	-0.20558	0.486411	-0.313521	0.952194
PFLU_4375	putative transport-related membrane protein	0.30024	0.114017	0.0658109	0.731761	0.0946829	0.637146	0.106433	0.588294	-0.205558	0.479338	0.0406226	0.998188
PFLU_5892	putative sinc-binding oxidoreductase	-0.987355	2.49764e-05	-1.2187	1.95623e-06	-1.19284	3.58723e-06	-1.36043	6.56614e-07	-0.205483	0.473044	-0.141735	0.998188
PFLU_3681	putative membrane protein	0.503504	0.143204	0.455394	0.179121	0.298271	0.415934	0.454562	0.203089	-0.205234	0.698663	-0.000831692	0.998705
PFLU_0114	putative LysR-family regulatory protein	-0.690365	0.00367301	-0.938541	0.000270001	-0.89541	0.000653337	-0.925278	0.000484858	-0.205045	0.568949	0.0132627	0.998391
PFLU_1928	putative lipoprotein	0.0501058	0.884916	-0.0712125	0.826014	-0.154859	0.664048	-0.0664801	0.852449	-0.204965	0.681617	0.00473245	0.998705
PFLU_0527	fbpB, iron(III)-transport system permease protein	-1.41763	9.38957e-06	-1.28991	2.12263e-05	-1.62256	3.49178e-06	-1.21789	6.51459e-05	-0.204933	0.613349	0.0720156	0.998188
PFLU_2367	putative dihydroxy-acid dehydratase	2.57639	1.56124e-07	2.76093	5.18664e-08	2.37163	5.04011e-07	2.40511	3.31349e-07	-0.204765	0.647736	-0.355826	0.998188
PFLU_2299	xylG, D-xylose ABC transport system, ATP-binding protein	0.385085	0.0564482	-0.186538	0.343479	0.180326	0.374438	-0.354936	0.0787802	-0.204759	0.512442	-0.168398	0.998188
PFLU_3575	putative ABC transport system, membrane protein	-0.283262	0.551296	0.2216	0.61271	-0.487983	0.345307	-0.0854178	0.868657	-0.204721	0.80221	-0.307018	0.998188
PFLU_5799	putative iron acquisition-related protein	-0.60084	0.00233734	-0.181893	0.295318	-0.805467	0.000300626	-0.2855	0.119225	-0.204627	0.475179	-0.103607	0.998188
PFLU_5100	hypothetical protein	0.777923	0.0108603	1.00811	0.00140775	0.573328	0.0673814	0.770532	0.0162652	-0.204595	0.620984	-0.23758	0.998188
PFLU_3909	conserved hypothetical protein	-0.212261	0.23914	-0.0126015	0.944669	-0.416843	0.026342	-0.0678788	0.710858	-0.204582	0.471886	-0.0552774	0.998188
PFLU_4887	putative CoA transferase family protein	0.948391	5.96756e-05	1.17906	4.42759e-06	0.743819	0.000732112	1.13268	8.77863e-06	-0.204572	0.472941	-0.0463821	0.998188
PFLU_0209	putative TonB-dependent membrane protein	-0.107137	0.746224	0.464443	0.125393	-0.311572	0.356071	0.389195	0.22154	-0.204435	0.689841	-0.0752474	0.998188
PFLU_5281	putative phage integrase	-0.649581	0.0100561	-0.540847	0.0254282	-0.853928	0.00210809	-0.550362	0.029711	-0.204347	0.606688	-0.00951427	0.998391
PFLU_3382	putative membrane protein	-0.361013	0.46165	0.520184	0.240236	-0.565355	0.287212	0.42592	0.381219	-0.204341	0.814779	-0.0942646	0.998188
PFLU_1809	conserved hypothetical exported protein	-0.386478	0.0055463	-0.914967	1.15609e-06	-0.590488	0.000197582	-0.743415	1.63607e-05	-0.204011	0.318585	0.171552	0.998188
PFLU_2123	putative methyl-accepting chemotaxis protein	-1.58406	6.32111e-07	-1.90745	5.83015e-08	-1.7879	2.59988e-07	-1.9663	8.3449e-08	-0.203837	0.568961	-0.058849	0.998188
PFLU_4218	hypothetical protein	0.566972	0.135896	0.422502	0.263966	0.363201	0.381795	0.60141	0.137925	-0.203771	0.717157	0.178908	0.998188
PFLU_1755	moeA, molybdopterin biosynthesis protein	0.465392	0.0215815	0.632214	0.00282454	0.261689	0.188625	0.449007	0.0261763	-0.203704	0.504057	-0.183207	0.998188
PFLU_0607	putative precorrin-3B C17-methyltransferase, cobalamin biosynthesis protein	-0.565987	0.00444477	-0.933431	5.20046e-05	-0.769645	0.000511772	-0.884302	0.000141304	-0.203658	0.486612	0.0491298	0.998188
PFLU_3479	conserved hypothetical protein	0.169275	0.318011	0.0979133	0.561998	-0.0343717	0.861476	0.276883	0.11308	-0.203647	0.423393	0.17897	0.998188
PFLU_5704	conserved hypothetical protein	-1.37096	1.2125e-06	-2.04859	8.05754e-09	-1.57451	3.8309e-07	-1.72427	1.25265e-07	-0.203548	0.522672	0.324318	0.989476
PFLU_3600	putative excinuclease ABC subunit A2	0.178301	0.1989	-0.203636	0.138457	-0.0251664	0.868884	-0.031152	0.828828	-0.203467	0.345367	0.172484	0.998188
PFLU_2677	putative membrane protein	1.97633	5.65977e-07	1.96537	4.89613e-07	1.77292	3.45568e-06	1.99025	6.96157e-07	-0.203418	0.546682	0.0248773	0.998188
PFLU_1663	putative 3-oxoacyl-[acyl-carrier-protein] synthase III	-0.539648	0.0289619	-0.296697	0.207836	-0.743055	0.00555571	-0.242277	0.318559	-0.203407	0.606688	0.0544197	0.998188
PFLU_3493	putative phosphotransferase	-0.206371	0.430157	-0.260822	0.306067	-0.409691	0.121554	-0.551704	0.0391319	-0.20332	0.628097	-0.290882	0.998188
PFLU_2146	putative antibiotic biosynthesis-related protein	1.03643	1.31861e-05	1.22595	1.51378e-06	0.833347	0.000170848	1.06076	1.11829e-05	-0.203087	0.443615	-0.165192	0.998188
PFLU_5283	putative phage integrase	0.115403	0.719622	0.0972509	0.752405	-0.0871784	0.801358	0.0466739	0.888032	-0.202581	0.677769	-0.050577	0.998188
PFLU_2865	hypothetical protein	1.33672	9.59602e-05	0.762926	0.00937631	1.13439	0.000592522	0.728441	0.0155815	-0.202333	0.624709	-0.0344853	0.998188
PFLU_0812	opuBA, choline ABC transport system, ATP-binding protein	0.319328	0.196119	0.540292	0.0289151	0.117087	0.666573	0.550194	0.0348058	-0.202242	0.590607	0.00990234	0.998391
PFLU_1477	dapA, dihydrodipicolinate synthase	1.76277	5.70018e-09	1.94521	1.14242e-09	1.56059	3.22579e-08	1.83084	2.96819e-09	-0.202181	0.403604	-0.114362	0.998188
PFLU_3153	putative AraC-family regulatory protein	1.72875	2.40606e-05	1.90899	5.97026e-06	1.52666	0.000138369	2.04467	3.96227e-06	-0.202087	0.633159	0.135682	0.998188
PFLU_1220	wspB, putative chemotaxis-related protein	-0.790175	0.0050479	-1.61076	7.80764e-06	-0.992141	0.00122875	-2.03088	1.60454e-06	-0.201966	0.640884	-0.420113	0.990972
PFLU_6086	putative RNA polymerase-binding protein	2.13734	0.000351456	1.92736	0.000901559	1.93543	0.00136951	1.97408	0.0012071	-0.201908	0.75313	0.0467261	0.998188
PFLU_3741	putative exported protein	-3.94883	2.37716e-09	-5.23251	9.39212e-11	-4.15045	1.61709e-09	-5.09046	1.33827e-10	-0.201622	0.690786	0.14205	0.998188
PFLU_3170	putative membrane protein	0.455312	0.380524	0.513672	0.30807	0.253715	0.663012	0.621972	0.25173	-0.201597	0.807621	0.108299	0.998188
PFLU_3829	NADH dehydrogenase I chain M	1.3265	2.79037e-07	0.800375	7.8004e-05	1.12503	2.43403e-06	0.779856	0.000118049	-0.201476	0.423393	-0.0205186	0.998188
PFLU_0336	putative peptidase	0.944365	1.34721e-05	1.02084	4.57837e-06	0.742919	0.000203915	0.955714	1.22046e-05	-0.201446	0.415138	-0.0651299	0.998188
PFLU_4950	enoyl-CoA hydratase/isomerase family protein	0.993202	1.68738e-05	1.3302	4.31098e-07	0.79194	0.000219087	1.54529	7.6737e-08	-0.201261	0.444981	0.215092	0.998188
PFLU_3880	putative exported protein	-0.859975	1.3936e-05	-1.08034	8.46819e-07	-1.06119	1.84845e-06	-1.12212	8.67432e-07	-0.201216	0.400044	-0.0417815	0.998188
PFLU_0578	ureC, urease alpha subunit	0.781048	0.00217168	0.032147	0.890115	0.579908	0.0173407	0.318214	0.170694	-0.20114	0.57829	0.286067	0.998188
PFLU_4188	putative N-(5-phosphoribosyl)anthranilate isomerase	1.34956	2.0122e-06	1.8259	3.59613e-08	1.14851	1.63786e-05	1.70739	1.0445e-07	-0.20105	0.494207	-0.11851	0.998188
PFLU_3478	putative membrane protein	-1.18495	0.000221635	-1.6292	8.15659e-06	-1.38547	8.38355e-05	-1.51797	3.44993e-05	-0.200526	0.661697	0.111231	0.998188
PFLU_0103	putative anion transporter, permease	2.0187	2.20884e-06	1.74845	1.03012e-05	1.8182	1.00785e-05	1.57216	4.92157e-05	-0.200496	0.633159	-0.176292	0.998188
PFLU_4045	putative ABC transport system integral membrane protein	-0.0610659	0.768926	-0.806658	0.000462842	-0.261445	0.198365	-0.59178	0.00668517	-0.20038	0.520657	0.214878	0.998188
PFLU_1661	putative pilin glycosylation protein (pseudogene)	-0.246929	0.115264	-0.285868	0.0656347	-0.447301	0.00814376	-0.37338	0.0217151	-0.200371	0.413328	-0.0875116	0.998188
PFLU_0122	putative GntR-family regulatory protein	0.523092	0.0353485	0.427193	0.076994	0.322884	0.202433	0.233702	0.358455	-0.200208	0.590607	-0.193491	0.998188
PFLU_3588	putative membrane protein	-1.17538	5.59115e-05	-1.67199	1.20373e-06	-1.37549	2.26203e-05	-1.16707	0.00011587	-0.200107	0.620984	0.50492	0.846794
PFLU_3379	methyl-accepting chemotaxis protein	-4.16105	2.37307e-11	-5.74959	8.87811e-13	-4.36109	1.87983e-11	-5.30461	2.35464e-12	-0.200039	0.607115	0.444973	0.932738
PFLU_3825	NADH Dehydrogenase I chain I	0.810143	3.34526e-05	0.449475	0.0055502	0.610142	0.000640962	0.468108	0.00484354	-0.200001	0.389744	0.0186325	0.998188
PFLU_1236	putative lipoprotein	0.481562	0.0733608	0.145471	0.582574	0.281795	0.293903	0.482427	0.0697929	-0.199767	0.643491	0.336957	0.998188
PFLU_1564	conserved hypothetical protein	-0.912545	0.000523866	-1.04625	0.000131079	-1.11231	0.000106522	-1.18951	5.13274e-05	-0.199762	0.592909	-0.143263	0.998188
PFLU_2555	putative drug-efflux protein	-1.86158	1.36222e-05	-1.63811	3.85627e-05	-2.06133	1.24746e-05	-1.51268	0.000207079	-0.19975	0.757042	0.125433	0.998188
PFLU_5117	putative cytochrome C	1.61688	0.000461003	1.55314	0.000607823	1.41715	0.00226734	1.18932	0.00940272	-0.199737	0.704778	-0.363818	0.998188
PFLU_1494	putative transport-related membrane protein (pseudogene)	0.535217	0.065405	1.5925	1.34531e-05	0.335549	0.262109	1.43308	5.86447e-05	-0.199669	0.64886	-0.159421	0.998188
PFLU_4226	hypothetical protein	-0.217242	0.366742	-0.328349	0.165059	-0.416789	0.0979351	-0.237507	0.339074	-0.199547	0.604677	0.0908419	0.998188
PFLU_3747	putative sigma-54 activated regulatory protein	-1.66752	2.46437e-08	-2.14544	7.78108e-10	-1.86698	6.91492e-09	-2.13883	9.72471e-10	-0.199469	0.458896	0.00660227	0.998391
PFLU_4873	putative noncomposite transposon	-0.269805	0.205934	-0.330592	0.117057	-0.468916	0.0379044	-0.125252	0.56991	-0.199111	0.563965	0.20534	0.998188
PFLU_0806	fruA, PTS system, fructose-specific IIBC component	1.1533	4.32418e-05	0.313452	0.156199	0.954288	0.000336872	0.126831	0.585574	-0.199016	0.560804	-0.186621	0.998188
PFLU_5108	conserved hypothetical protein	1.19214	0.00283129	1.14696	0.00343708	0.993308	0.0136023	1.24881	0.00274102	-0.198837	0.695218	0.101857	0.998188
PFLU_1836	fabA, 3-hydroxydecanoyl-[acyl-carrier-protein] dehydratase	-0.611853	0.00281721	-0.334951	0.0700498	-0.810687	0.000294146	-0.512008	0.00924771	-0.198834	0.502569	-0.177057	0.998188
PFLU_2740	xylulose kinase	-0.431426	0.0495359	-0.624938	0.0062659	-0.630195	0.00705605	-0.61936	0.00732636	-0.198769	0.569146	0.00557806	0.998391
PFLU_4558	putative cytochrome C oxidase subunit	-1.46585	1.304e-08	-1.90694	3.38074e-10	-1.66458	2.98576e-09	-2.00273	2.08123e-10	-0.198727	0.375034	-0.0957908	0.998188
PFLU_1335	putative lipoprotein	0.114414	0.575921	0.467151	0.0200746	-0.0842443	0.694591	0.105048	0.61112	-0.198658	0.520435	-0.362104	0.86393
PFLU_1706	conserved hypothetical protein	0.762963	0.00120211	1.12285	2.25949e-05	0.564493	0.0130682	0.866454	0.000475526	-0.19847	0.521437	-0.256397	0.998188
PFLU_4838	glucose 6-phosphate dehydrogenase	-1.05635	8.47948e-06	-1.45184	1.60109e-07	-1.2547	1.35557e-06	-1.4203	2.39508e-07	-0.198348	0.473832	0.0315426	0.998188
PFLU_4670	conserved hypothetical protein	0.541531	0.0174954	0.790119	0.00114315	0.343564	0.130075	0.749493	0.00223817	-0.197968	0.557658	-0.0406257	0.998188
PFLU_4635	conserved hypothetical membrane protein	1.01936	1.51935e-05	0.825824	0.000127025	0.822075	0.000199985	0.84418	0.000143906	-0.19729	0.450064	0.0183563	0.998296
PFLU_0904	mqo, probable malate:quinone oxidoreductase	-0.416965	0.0107452	-0.468789	0.00456884	-0.613946	0.000661284	-0.655425	0.000323171	-0.196981	0.418255	-0.186636	0.998188
PFLU_5614	bioF, 8-amino-7-oxononanoate synthase	0.377529	0.1423	0.347388	0.170185	0.180614	0.507842	0.139569	0.607546	-0.196915	0.623486	-0.207819	0.998188
PFLU_0067	scoP, putative copper-binding protein	-2.4023	9.03266e-11	-3.15775	2.79912e-12	-2.5991	4.35631e-11	-3.19377	3.21304e-12	-0.196798	0.429619	-0.0360197	0.998188
PFLU_5580	apaH, bis(5-nucleosyl)-tetraphosphatase, symmetrical	-0.609171	0.00434396	-0.949033	9.39669e-05	-0.80595	0.00072376	-1.07746	5.52101e-05	-0.196779	0.538455	-0.12843	0.998188
PFLU_0016	rsmB, ribosomal RNA small subunit methyltransferase B	1.35244	6.98204e-06	1.64708	5.02699e-07	1.15647	5.71764e-05	1.7825	2.49297e-07	-0.195975	0.535803	0.135423	0.998188
PFLU_5767	conserved hypothetical protein	1.03271	0.00448322	1.22133	0.00106623	0.836803	0.0207307	1.03383	0.00539334	-0.195906	0.698663	-0.187492	0.998188
PFLU_0434	putative membrane protein	-0.480802	0.0206007	-0.378792	0.0569327	-0.676635	0.00350739	-0.392891	0.0635761	-0.195832	0.547606	-0.0140994	0.998391
PFLU_5539	nusG, transcription antitermination protein	2.37417	2.13785e-10	2.65976	3.70994e-11	2.17849	7.45756e-10	2.50208	8.73697e-11	-0.19568	0.436803	-0.157675	0.998188
PFLU_1688	putative deoxyribonuclease	-0.188089	0.301431	0.0336889	0.852544	-0.383732	0.0445663	-0.00776152	0.969424	-0.195643	0.490592	-0.0414504	0.998188
PFLU_5886	conserved hypothetical protein	1.91157	1.84666e-06	2.26928	1.56205e-07	1.71601	9.84429e-06	2.31803	1.6721e-07	-0.195565	0.606688	0.0487546	0.998188
PFLU_5540	secE, preprotein translocase SecE subunit	2.23109	2.61468e-10	2.44274	5.97157e-11	2.03553	9.87133e-10	2.30844	1.35716e-10	-0.195564	0.418027	-0.134294	0.998188
PFLU_3511	putative exported protein	-0.346059	0.0220115	-0.624711	0.000275342	-0.541319	0.00132656	-0.761562	5.43647e-05	-0.19526	0.395824	-0.136852	0.998188
PFLU_4722	putative phosphopantetheinyl transferase	0.624986	0.0312478	0.45137	0.109121	0.42974	0.150046	0.675155	0.0257024	-0.195246	0.642093	0.223784	0.998188
PFLU_5421	putative peptidoglycan-related protein	1.57007	6.04416e-07	1.81406	7.67703e-08	1.375	3.72255e-06	1.85952	6.86048e-08	-0.195067	0.525727	0.0454578	0.998188
PFLU_2095	conserved hypothetical protein	-0.399372	0.0922199	-0.877213	0.00101166	-0.593889	0.0184681	-0.886469	0.00130894	-0.194516	0.612339	-0.00925557	0.998391
PFLU_4330	conserved hypothetical protein	0.937734	0.00017373	0.911681	0.000201046	0.743221	0.00169737	1.03319	7.21563e-05	-0.194513	0.534365	0.121513	0.998188
PFLU_4869	putative exported protein	0.432683	0.0297319	0.613296	0.00310501	0.238172	0.242874	0.567978	0.00765258	-0.194511	0.498645	-0.0453171	0.998188
PFLU_3249	putative radical SAM protein	0.263012	0.0804896	-0.0424779	0.780152	0.0689629	0.665598	-0.110321	0.476457	-0.194049	0.395824	-0.0678429	0.998188
PFLU_4636	conserved hypothetical protein	0.438081	0.0215815	0.23763	0.193519	0.244177	0.203063	0.1396	0.471854	-0.193904	0.482946	-0.0980307	0.998188
PFLU_3612	putative DeoR family transcriptional regulator	0.544413	0.0372479	0.616819	0.0181925	0.350749	0.189491	0.636495	0.019616	-0.193664	0.61806	0.0196762	0.998391
PFLU_4005	putative 4-amino-4-deoxy-l-arabinose lipid A transferase	-0.298843	0.263653	-0.0660153	0.804442	-0.492435	0.0869981	-0.128834	0.652827	-0.193592	0.653566	-0.0628191	0.998188
PFLU_5324	putative lipoprotein	-1.59669	4.59705e-09	-3.25954	9.41875e-13	-1.79018	1.62361e-09	-3.29104	1.63562e-12	-0.193495	0.405697	-0.0315023	0.998188
PFLU_1945	putative glyoxalase	-1.10362	0.000167794	-0.830527	0.00161417	-1.29679	7.70497e-05	-0.8854	0.00193028	-0.193165	0.648515	-0.0548734	0.998188
PFLU_2073	putative membrane protein	-1.17892	6.79036e-06	-2.2829	2.20753e-09	-1.37196	1.78296e-06	-1.88327	4.137e-08	-0.193043	0.538753	0.399635	0.86393
PFLU_4926	putative transmembrane protein	1.80152	5.64287e-07	1.67524	1.1351e-06	1.60855	3.06958e-06	1.75249	9.04123e-07	-0.192971	0.568949	0.0772529	0.998188
PFLU_0799	putative inner membrane protein	0.889928	8.91928e-05	0.594143	0.00297467	0.6971	0.00113266	0.599567	0.00364336	-0.192828	0.478975	0.00542378	0.998391
PFLU_5057	1-hydroxy-2-methyl-2-(E)-butenyl 4-diphosphate synthase	0.474341	0.004259	0.269744	0.0763679	0.281575	0.0730056	0.132039	0.392456	-0.192766	0.41725	-0.137705	0.998188
PFLU_0013	htrB, lipid A biosynthesis lauroyl acyltransferase	1.28962	4.63532e-06	1.43257	1.07426e-06	1.09701	3.62057e-05	1.30724	4.21733e-06	-0.192607	0.523687	-0.125338	0.998188
PFLU_4590	putative chromosome partition protein	0.0612859	0.670356	-0.153059	0.261257	-0.131294	0.351729	-0.1782	0.196065	-0.19258	0.371721	-0.0251412	0.998188
PFLU_5462	dxs, 1-deoxy-D-xylulose-5-phosphate synthase	0.827465	6.84075e-05	0.87492	3.2189e-05	0.63496	0.000903273	0.688935	0.000386864	-0.192505	0.458896	-0.185985	0.998188
PFLU_0895	hisG, ATP phosphoribosyltransferase	2.07573	2.94263e-10	2.19213	1.03349e-10	1.88325	1.31595e-09	1.93363	6.54792e-10	-0.192484	0.37942	-0.258499	0.867981
PFLU_5460	xseB, exodeoxyribonuclease VII small subunit	1.33089	0.000155748	1.16789	0.000503364	1.13845	0.000950233	1.06866	0.00170211	-0.19244	0.638243	-0.0992384	0.998188
PFLU_2363	putative ArsR-family regulatory protein	0.52378	0.0341778	0.563764	0.0218385	0.331408	0.190813	0.483906	0.0566536	-0.192372	0.601707	-0.0798581	0.998188
PFLU_3559	conserved hypothetical protein	0.136774	0.557112	0.967401	0.000243574	-0.055541	0.824269	0.836801	0.00105822	-0.192315	0.594748	-0.130601	0.998188
PFLU_1724	conserved hypothetical protein	0.841066	0.00422455	1.08446	0.000455428	0.648966	0.0261571	1.02852	0.00105822	-0.1921	0.632604	-0.0559369	0.998188
PFLU_2139	putative transport-related membrane protein	0.760678	0.000651326	0.883554	0.000136073	0.568614	0.00818969	0.807052	0.000496429	-0.192064	0.498248	-0.0765022	0.998188
PFLU_0094	conserved hypothetical membrane protein	-0.338252	0.0483879	-0.473793	0.00753399	-0.530211	0.00458978	-0.502916	0.00638994	-0.19196	0.470838	-0.0291231	0.998188
PFLU_5941	rnk, regulator of nucleoside diphosphate kinase	1.02651	1.11201e-05	0.334711	0.0591255	0.834661	0.000138058	0.261257	0.154421	-0.19185	0.45431	-0.073454	0.998188
PFLU_1521	conserved hypothetical protein	-0.93206	1.99368e-06	-0.812205	7.97496e-06	-1.12386	2.77419e-07	-0.694161	5.5616e-05	-0.191802	0.376509	0.118044	0.998188
PFLU_1585	talB, transaldolase B	0.956407	2.0649e-05	1.0652	5.10189e-06	0.764802	0.000223488	0.923555	2.73549e-05	-0.191605	0.47516	-0.141648	0.998188
PFLU_4575	recombination protein	0.473339	0.0472254	0.431894	0.064093	0.281811	0.240899	0.447187	0.0622434	-0.191528	0.605212	0.0152929	0.998391
PFLU_1826	putative membrane protein	0.394782	0.131441	0.380461	0.139982	0.203494	0.467854	0.00997535	0.973884	-0.191289	0.633159	-0.370486	0.990668
PFLU_1861	hypothetical protein	0.42021	0.0612659	-0.473733	0.0379876	0.229025	0.317888	-0.630121	0.0117	-0.191185	0.582336	-0.156388	0.998188
PFLU_5234	putative tRNA synthetase	0.162916	0.391401	0.150095	0.42	-0.0279987	0.892813	0.21695	0.254442	-0.190915	0.51282	0.0668545	0.998188
PFLU_4848	putative membrane protein	0.265321	0.498557	0.806328	0.0323522	0.074445	0.867404	0.187651	0.655991	-0.190876	0.761971	-0.618677	0.922796
PFLU_1208	conserved hypothetical protein	-0.670129	0.00290752	-0.776505	0.000818218	-0.860744	0.000517127	-0.875302	0.000448273	-0.190614	0.571276	-0.0987964	0.998188
PFLU_4159	putative ribose transport system, ATP-binding protein	-0.977367	0.00595309	-1.25342	0.000851298	-1.16795	0.00193109	-1.24329	0.0011099	-0.190578	0.739896	0.0101266	0.998391
PFLU_0933	diaA, DnaA initiator-associating protein	1.40919	2.69378e-07	1.1939	1.83044e-06	1.2187	2.43971e-06	1.33957	6.59914e-07	-0.190482	0.437871	0.145664	0.998188
PFLU_0840	rpsI, 30S ribosomal protein S9	2.67037	7.65754e-10	2.89249	2.0736e-10	2.48005	2.20295e-09	2.87286	2.53204e-10	-0.190324	0.547786	-0.0196263	0.998391
PFLU_4527	putative mechanosensitive ion channel forming protein	-1.00268	0.000455093	-1.17762	8.92788e-05	-1.19285	0.000128145	-1.30169	5.26908e-05	-0.190171	0.641751	-0.124074	0.998188
PFLU_0323	mutY, A/G-specific adenine glycosylase	0.325985	0.0234738	0.568668	0.000396659	0.136519	0.341224	0.629658	0.000178943	-0.189466	0.377673	0.0609903	0.998188
PFLU_3223	putative non-ribosomal peptide synthetase	-1.48423	2.03972e-07	-1.49066	1.5353e-07	-1.67348	6.37864e-08	-1.60776	8.46254e-08	-0.189245	0.515095	-0.117104	0.998188
PFLU_5628	putative anti sigma factor	-1.98628	6.04669e-08	-1.07999	3.93502e-05	-2.17552	4.66805e-08	-1.2069	2.40451e-05	-0.189242	0.634207	-0.126914	0.998188
PFLU_2096	putative transport-related membrane protein	-0.163203	0.462066	-0.469695	0.0339819	-0.351789	0.115032	-0.559041	0.0154748	-0.188586	0.594392	-0.0893465	0.998188
PFLU_0430	putative histidine ammonia-lyase	0.38529	0.0775641	0.113295	0.602449	0.196816	0.386938	0.170068	0.453591	-0.188475	0.573703	0.0567727	0.998188
PFLU_2678	hypothetical protein	0.994601	5.42109e-06	0.867365	2.14933e-05	0.806137	7.11237e-05	0.813626	5.72213e-05	-0.188464	0.425753	-0.0537396	0.998188
PFLU_0233	putative lipoprotein	-0.212865	0.232535	-0.95712	3.0653e-05	-0.401147	0.0329196	-0.854264	0.000156473	-0.188281	0.502743	0.102856	0.998188
PFLU_5337	radA, DNA repair protein	1.04484	0.00014413	1.45085	3.17784e-06	0.856562	0.00114675	1.38594	7.47983e-06	-0.188279	0.578973	-0.0649129	0.998188
PFLU_3770	3-deoxy-manno-octulosonate cytidylyltransferase	0.682024	0.000545861	0.723734	0.000279081	0.49391	0.00813855	0.669685	0.000744906	-0.188114	0.465743	-0.0540483	0.998188
PFLU_1237	putative membrane protein	0.654817	0.0175241	0.516121	0.051062	0.467002	0.0818319	0.735505	0.00838066	-0.187816	0.661697	0.219383	0.998188
PFLU_1164	mutS, DNA mismatch repair protein	-0.0418836	0.771611	0.0299844	0.828685	-0.229622	0.101304	-0.169354	0.216761	-0.187739	0.37974	-0.199338	0.990668
PFLU_3055	hypothetical protein	0.52511	0.195161	0.533583	0.180954	0.337632	0.446208	0.580055	0.176239	-0.187478	0.765974	0.0464711	0.998188
PFLU_3311	putative hydrolase	0.9516	4.13742e-05	1.47047	1.73899e-07	0.764215	0.000514473	0.913946	8.25412e-05	-0.187385	0.479338	-0.556519	0.296594
PFLU_4296	putative regulatory protein (pseudogene)	-1.36287	0.000581792	-1.46923	0.000276192	-1.55013	0.000371876	-1.38983	0.000890259	-0.18726	0.776901	0.0794005	0.998188
PFLU_2091	conserved hypothetical protein	-0.0522312	0.767939	-0.235776	0.155631	-0.239368	0.161678	-0.262732	0.119355	-0.187137	0.478975	-0.026956	0.998188
PFLU_3883	putative phosphate-related ABC transport system, exported protein	-0.250348	0.362851	-0.110347	0.684745	-0.437042	0.135608	-0.0761751	0.795715	-0.186694	0.673057	0.0341717	0.998188
PFLU_3005	histone deacetylase family protein	-0.479495	0.0844522	-0.289872	0.281176	-0.666181	0.0285199	-0.642832	0.0352395	-0.186686	0.684294	-0.352961	0.998188
PFLU_4504	conserved hypothetical protein	0.531785	0.00161556	0.661586	0.000206384	0.3456	0.0290998	0.602605	0.000587129	-0.186185	0.421065	-0.0589811	0.998188
PFLU_2710	putative transmembrane transport protein	-2.51027	6.66894e-09	-2.33049	1.10304e-08	-2.69638	5.68236e-09	-2.32759	2.47869e-08	-0.186113	0.656227	0.00290479	0.998705
PFLU_1773	putative 2-amino-3-ketobutyrate coenzyme A ligase	0.235143	0.274981	0.168045	0.429963	0.0490375	0.836881	0.158749	0.471727	-0.186105	0.585375	-0.00929631	0.998391
PFLU_2215	putative monoxygenase	-0.321905	0.111049	0.167521	0.391987	-0.50789	0.01993	0.079799	0.701521	-0.185985	0.567114	-0.0877219	0.998188
PFLU_1200	conserved hypothetical protein	0.387541	0.0837305	0.626675	0.00686259	0.201576	0.391441	0.498352	0.0338475	-0.185965	0.582415	-0.128323	0.998188
PFLU_2191	pgsA, CDP-diacylglycerol--glycerol-3-phosphate 3-phosphatidyltransferase	0.732532	0.0011555	0.836845	0.00031388	0.546657	0.0111595	0.794107	0.00062188	-0.185875	0.547786	-0.0427381	0.998188
PFLU_0603	cobL, precorrin-6Y C(5,15)-methyltransferase [decarboxylating]	1.90468	2.45817e-07	2.1418	3.99095e-08	1.71898	1.3581e-06	2.35252	1.54044e-08	-0.185706	0.561557	0.210726	0.998188
PFLU_5962	xpt, xanthine phosphoribosyltransferase	-0.683629	0.000992027	-1.04821	1.38017e-05	-0.869212	0.000150122	-1.14214	8.74615e-06	-0.185583	0.530339	-0.0939322	0.998188
PFLU_1071	putative GntR-family regulatory protein	-0.585129	0.0080312	-0.321404	0.114469	-0.770705	0.00151052	-0.313796	0.13744	-0.185576	0.585375	0.00760886	0.998391
PFLU_5749	pilJ, type IV pilus biogenesis protein/tiwtiching mobility protein/methyl accepting chemotaxis-related protein	0.418702	0.0125385	0.192713	0.22227	0.233189	0.154429	0.33798	0.0400408	-0.185513	0.449412	0.145267	0.998188
PFLU_0412	aroB, 3-dehydroquinate synthase	1.07977	4.91903e-07	1.4268	1.08001e-08	0.894262	5.32518e-06	1.2933	4.46861e-08	-0.185504	0.39264	-0.133504	0.998188
PFLU_4214	putative multidrug resistance protein	0.165266	0.422313	0.0541156	0.793702	-0.0199651	0.930967	0.193987	0.351753	-0.185231	0.563965	0.139872	0.998188
PFLU_5479	conserved hypothetical protein	3.84862	2.95686e-10	3.54326	6.30792e-10	3.66367	7.27325e-10	2.97443	9.5056e-09	-0.18495	0.602998	-0.568825	0.616112
PFLU_5456	conserved hypothetical protein	-0.622689	0.00549352	-0.807885	0.000695487	-0.807534	0.00114675	-1.07079	0.000106841	-0.184845	0.592117	-0.262907	0.998188
PFLU_3779	conserved hypothetical protein	1.12093	0.00319165	0.95597	0.00903108	0.936342	0.0141417	0.85319	0.0249235	-0.18459	0.715235	-0.102781	0.998188
PFLU_4945	putative regulatory protein	0.715283	0.00156002	0.355608	0.0807261	0.530716	0.016276	0.565442	0.0110864	-0.184566	0.534912	0.209833	0.998188
PFLU_6052	conserved hypothetical protein	-0.469544	0.0292334	-0.714519	0.00197365	-0.65406	0.00521426	-0.920819	0.000349679	-0.184515	0.590412	-0.2063	0.998188
PFLU_1925	hypothetical protein	0.181083	0.404032	0.062589	0.774199	-0.00332307	0.988566	0.147906	0.506073	-0.184406	0.585375	0.0853174	0.998188
PFLU_1518	putative dehydrogenase	-0.399426	0.00586221	-0.544702	0.000463646	-0.583497	0.000340173	-0.639719	0.000130736	-0.184071	0.384842	-0.0950167	0.998188
PFLU_0912	conserved hypothetical protein	-0.310305	0.032163	-0.0621907	0.659678	-0.494372	0.00193688	-0.114035	0.42148	-0.184066	0.407128	-0.0518442	0.998188
PFLU_1231	conserved hypothetical protein	-0.477163	0.00329638	-0.55666	0.000876345	-0.66119	0.00025406	-0.626496	0.000377435	-0.184028	0.431723	-0.0698361	0.998188
PFLU_5676	conserved hypothetical protein	-0.311464	0.251679	-0.31971	0.231717	-0.495296	0.0859863	-0.453494	0.115016	-0.183832	0.678682	-0.133785	0.998188
PFLU_0104	putative exported protein	1.15633	7.32638e-06	0.942505	6.05654e-05	0.972508	6.52932e-05	0.709151	0.0012397	-0.183819	0.512518	-0.233354	0.998188
PFLU_3131	putative cation transport related protein	0.491593	0.0285175	0.98773	0.000135811	0.307836	0.175358	1.00695	0.000152904	-0.183757	0.585375	0.0192248	0.998391
PFLU_3671	putative glycosyltransferase	0.755965	0.00219273	0.645816	0.00631314	0.572221	0.0174055	0.508577	0.0320655	-0.183744	0.586008	-0.137239	0.998188
PFLU_2949B	hypothetical protein	-0.329494	0.210296	-0.154201	0.552144	-0.513059	0.070768	-0.278145	0.317924	-0.183565	0.668204	-0.123944	0.998188
PFLU_3553	putative membrane protein	-0.161512	0.346595	0.496035	0.00514852	-0.345024	0.0569244	0.499775	0.00628966	-0.183512	0.48941	0.00374008	0.998391
PFLU_1989	putative 3-oxoacyl-[acyl-carrier-protein] reductase	0.231082	0.440494	-0.0263781	0.930304	0.0476123	0.885211	0.120577	0.699907	-0.18347	0.699947	0.146955	0.998188
PFLU_0193	conserved hypothetical protein	0.0307999	0.865877	0.163034	0.32404	-0.152247	0.386727	0.0752207	0.66926	-0.183047	0.481958	-0.0878137	0.998188
PFLU_3232	general secretion pathway protein D/Q	0.149356	0.482598	0.0526298	0.804442	-0.0335397	0.886786	0.172328	0.430853	-0.182895	0.575193	0.119698	0.998188
PFLU_1613	mqo, malate:quinone oxidoreductase	1.30668	1.05653e-07	1.42136	2.71974e-08	1.12384	7.93011e-07	1.30171	9.68151e-08	-0.182843	0.425222	-0.119656	0.998188
PFLU_0500	putative exported protein	-0.301531	0.0895272	-0.662443	0.00089689	-0.483816	0.0112984	-0.733683	0.000516655	-0.182286	0.514443	-0.0712401	0.998188
PFLU_2991	lactoylglutathione lyase	0.831539	0.000147353	1.36456	4.65872e-07	0.649399	0.00156895	1.34406	6.65604e-07	-0.18214	0.512442	-0.0205005	0.998188
PFLU_0936	putative lipoprotein	0.139647	0.286115	0.112862	0.381697	-0.0424433	0.763175	0.0355883	0.789985	-0.18209	0.372038	-0.0772741	0.998188
PFLU_1284	rnhB, ribonuclease HII	-0.495301	0.00473613	-0.652585	0.000489125	-0.677298	0.00055227	-0.681401	0.000515667	-0.181997	0.480464	-0.028816	0.998188
PFLU_2346	conserved hypothetical protein	-0.993653	1.68605e-05	-1.24462	1.1091e-06	-1.17556	3.86809e-06	-1.22781	2.26658e-06	-0.181904	0.525035	0.016803	0.998391
PFLU_1023	putative penicillin-binding exported protein	0.0607817	0.788366	0.160378	0.447579	-0.12095	0.597765	-0.102852	0.650599	-0.181732	0.592893	-0.263231	0.998188
PFLU_3246	putative adhesin	-0.828055	0.000177422	-1.06288	1.12308e-05	-1.0097	2.64066e-05	-1.02941	1.76924e-05	-0.181646	0.53491	0.0334725	0.998188
PFLU_2964	putative membrane protein	1.82875	0.00195449	1.73052	0.00288524	1.64711	0.0068716	1.09879	0.0784103	-0.18164	0.787654	-0.631731	0.990668
PFLU_1069	putaitve lipoprotein	2.04051	1.76035e-07	1.62167	2.92949e-06	1.85914	8.68975e-07	2.02942	2.32278e-07	-0.181373	0.57829	0.407754	0.825229
PFLU_4917	aspartyl-tRNA synthetase	-0.871006	3.10058e-05	-1.21009	5.91705e-07	-1.05217	4.23103e-06	-1.33394	1.9661e-07	-0.181162	0.479941	-0.123856	0.998188
PFLU_5803	folA, dihydrofolate reductase	0.295607	0.149345	0.125205	0.541117	0.114644	0.602476	0.350691	0.0978801	-0.180963	0.568942	0.225485	0.998188
PFLU_0337	gpmI, 2,3-bisphosphoglycerate-independent phosphoglycerate mutase	1.00136	3.45066e-05	1.42601	4.89669e-07	0.820429	0.000283144	1.44758	4.521e-07	-0.180932	0.540886	0.0215689	0.998188
PFLU_5309	putative methyl-accepting chemotaxis protein	-1.66966	1.84508e-08	-1.87207	3.21794e-09	-1.85054	6.40832e-09	-1.8147	6.27106e-09	-0.180885	0.498645	0.0573655	0.998188
PFLU_3254	putative carboxylase (pseudogene)	0.318643	0.211482	0.390443	0.119366	0.137788	0.621609	0.163791	0.553217	-0.180856	0.639673	-0.226652	0.998188
PFLU_1401	conserved hypothetical protein	-0.564111	0.0014569	-0.944803	8.5741e-06	-0.74495	0.000164946	-0.874035	3.18718e-05	-0.180838	0.472941	0.0707673	0.998188
PFLU_5945	lysA, diaminopimelate decarboxylase	-0.00162062	0.990872	-0.32785	0.0122323	-0.182055	0.155821	-0.430715	0.00217439	-0.180435	0.359862	-0.102865	0.998188
PFLU_5240	2-amino-4-hydroxy-6-hydroxymethyldihydropteridi ne pyrophosphokinase	-0.137	0.4781	-0.0868487	0.647328	-0.317215	0.111028	-0.179532	0.361729	-0.180215	0.549988	-0.092683	0.998188
PFLU_5024	GntR family transcriptional regulator	0.666806	0.0367487	1.89	4.72117e-06	0.48673	0.13595	1.15397	0.00114754	-0.180076	0.711101	-0.736036	0.597885
PFLU_3017	putative two-component system histidine kinase/response regulator fusion	0.275752	0.0370375	0.431177	0.00220122	0.0957314	0.474619	0.308043	0.021481	-0.180021	0.368932	-0.123134	0.998188
PFLU_2844A	conserved hypothetical protein	-0.487048	0.0643376	-0.762577	0.0061851	-0.666906	0.0197007	-0.679062	0.0188539	-0.179857	0.677449	0.0835152	0.998188
PFLU_3905	putative exported protein	-1.8913	1.83195e-09	-3.01649	5.66708e-12	-2.07113	8.83411e-10	-3.09758	7.46631e-12	-0.179838	0.482434	-0.0810951	0.998188
PFLU_5552	putative dehydrogenase	0.763673	6.4732e-05	0.561217	0.00105796	0.583964	0.001008	0.501542	0.00321068	-0.179709	0.435863	-0.0596743	0.998188
PFLU_0814	putative amino acid ABC transport system, substrate-binding protein	0.970785	0.0282301	1.18883	0.00739006	0.791179	0.0890487	1.31763	0.00572627	-0.179606	0.774054	0.128801	0.998188
PFLU_1744	conserved hypothetical protein	0.0422242	0.878848	0.221873	0.377912	-0.137339	0.607764	0.273436	0.283661	-0.179564	0.663417	0.0515632	0.998188
PFLU_5292	conserved hypothetical protein	2.01156	1.003e-06	2.15295	3.34365e-07	1.83211	4.27488e-06	1.99413	1.28929e-06	-0.179453	0.638843	-0.158824	0.998188
PFLU_3217	putative diaminobutyrate--2-oxoglutarate aminotransferase	-1.37578	5.18421e-05	-1.40014	3.69353e-05	-1.55514	3.15801e-05	-1.28958	0.000196525	-0.179364	0.715189	0.110555	0.998188
PFLU_2636	putative ATP-binding component of ABC transporter	-0.0718754	0.629181	-0.24823	0.0806523	-0.251138	0.0911132	-0.467509	0.00384012	-0.179262	0.418027	-0.219279	0.990668
PFLU_0244	putative ABC transport system, ATP-binding protein	-0.10616	0.648604	-0.350668	0.115516	-0.285249	0.218404	-0.439331	0.0614653	-0.17909	0.620984	-0.0886624	0.998188
PFLU_3420	putative high-affinity branched-chain amino acid transport ATP-binding protein	-0.207064	0.774596	0.739029	0.227138	-0.385757	0.623228	0.00531454	0.994262	-0.178693	0.885475	-0.733714	0.998188
PFLU_1103	putative amino acid transport-related membrane protein	-1.03372	3.94724e-05	-0.853503	0.000227619	-1.21233	9.93987e-06	-0.920761	0.000152202	-0.178612	0.584089	-0.0672578	0.998188
PFLU_1581	putative exported protein	0.105708	0.406445	-0.0788715	0.529511	-0.0728837	0.578383	-0.168457	0.178935	-0.178592	0.363876	-0.0895856	0.998188
PFLU_0927	putative membrane protein	-1.06306	1.25474e-06	-1.84782	1.06218e-09	-1.24148	2.73281e-07	-1.83411	2.0369e-09	-0.178415	0.459242	0.0137101	0.998391
PFLU_1756	conserved hypothetical protein	-2.92414	1.25041e-09	-3.28762	2.45467e-10	-3.10203	1.03468e-09	-3.00242	1.14439e-09	-0.177888	0.660815	0.285197	0.998188
PFLU_0182	putative response regulator	-0.997565	5.22798e-07	-1.15893	6.46015e-08	-1.17531	9.33841e-08	-1.09639	1.83906e-07	-0.17775	0.395341	0.0625379	0.998188
PFLU_2402	putative transposase	0.744399	0.00682817	0.977459	0.000705092	0.566662	0.0412513	1.05239	0.000556466	-0.177737	0.636222	0.0749333	0.998188
PFLU_3826	NADH dehydrogenase I chain J	0.988204	7.72879e-06	0.715904	0.000210718	0.810518	8.784e-05	0.474391	0.00785743	-0.177685	0.465779	-0.241512	0.990668
PFLU_1256	cspA1, major cold shock protein	-0.925573	0.000394824	-0.781529	0.00147488	-1.10304	8.51248e-05	-0.489643	0.030693	-0.177472	0.624709	0.291885	0.998188
PFLU_0756	hemH, ferrochelatase	-2.19171	3.36456e-11	-2.57452	3.45344e-12	-2.36916	1.76296e-11	-2.71652	2.64427e-12	-0.177446	0.407128	-0.141996	0.998188
PFLU_4895	putative regulatory protein	0.87818	9.72188e-05	1.12265	5.43601e-06	0.700781	0.000980338	1.1308	6.424e-06	-0.177399	0.522672	0.00814486	0.998391
PFLU_0394	phaC, poly(3-hydroxyalkanoate) polymerase 2	-0.838589	9.03992e-05	-1.61073	3.98111e-08	-1.01597	1.34488e-05	-1.49876	1.14128e-07	-0.177382	0.521437	0.111971	0.998188
PFLU_0303	wssD, endoglucanase precursor	0.108711	0.640395	-0.287111	0.19922	-0.0686596	0.783055	-0.288873	0.221281	-0.177371	0.61806	-0.00176186	0.998705
PFLU_5784	conserved hypothetical protein	1.1352	6.7112e-05	1.1612	4.41803e-05	0.957966	0.000569022	0.553944	0.0346398	-0.177232	0.57829	-0.607257	0.480161
PFLU_1807	hypothetical protein	-1.45631	0.000288782	-1.72683	5.56927e-05	-1.63334	0.000210526	-1.88462	7.86932e-05	-0.177029	0.78987	-0.157789	0.998188
PFLU_4830	putative long-chain-fatty-acid--CoA ligase	-1.32153	2.58128e-05	-1.87096	4.28633e-07	-1.49852	7.52583e-06	-1.79729	8.05975e-07	-0.176998	0.65294	0.0736782	0.998188
PFLU_4187	acetyl CoA carboxylase, carboxyltranferase subunit beta	0.0904487	0.660511	0.342785	0.0801197	-0.0864301	0.678466	0.163879	0.40823	-0.176879	0.578444	-0.178906	0.998188
PFLU_5313	hypothetical protein	0.413719	0.0419168	0.265032	0.178959	0.236972	0.248945	0.190415	0.353519	-0.176747	0.568949	-0.0746162	0.998188
PFLU_5791	coaD, phosphopantetheine adenylyltransferase	-0.341169	0.0899409	-0.282304	0.15172	-0.517555	0.0152706	-0.328494	0.103776	-0.176386	0.585375	-0.0461902	0.998188
PFLU_4991	conserved hypothetical protein	2.3435	9.89586e-07	3.05481	2.32843e-08	2.16726	3.43595e-06	3.20003	1.55389e-08	-0.176237	0.689841	0.145223	0.998188
PFLU_3703	conserved hypothetical protein	0.157185	0.533056	-0.403126	0.102816	-0.019015	0.944792	-0.281254	0.272663	-0.1762	0.65294	0.121872	0.998188
PFLU_1376	putative membrane protein	-0.278475	0.0905924	-1.00076	6.57984e-06	-0.454513	0.00994709	-1.12908	2.46365e-06	-0.176038	0.495112	-0.128313	0.998188
PFLU_1456	conserved hypothetical protein	-0.493233	0.141578	-0.229229	0.48108	-0.669049	0.068636	-0.334379	0.349754	-0.175816	0.766733	-0.10515	0.998188
PFLU_0834	putative tryptophanyl-tRNA synthetase	-0.214945	0.0869254	-0.25055	0.0448315	-0.390589	0.00438516	-0.33508	0.0110903	-0.175645	0.367675	-0.0845302	0.998188
PFLU_5071	putative tRNA/rRNA methyltransferase	0.713775	0.000100707	0.806281	2.32068e-05	0.538235	0.00162976	0.695557	0.000145642	-0.17554	0.435863	-0.110723	0.998188
PFLU_5563	rpe, ribulose-phosphate 3-epimerase	-0.0181113	0.936702	-0.143604	0.472328	-0.193631	0.34936	-0.222667	0.274478	-0.17552	0.586091	-0.0790627	0.998188
PFLU_4538	putative putative ECF-family RNA polymerase sigma factor	1.26775	1.06559e-06	1.5055	9.51303e-08	1.09225	8.0371e-06	1.40882	2.94791e-07	-0.175505	0.500353	-0.0966779	0.998188
PFLU_5924	putative ABC transport system, membrane protein	1.13606	0.000269116	0.952054	0.00124726	0.960591	0.00181783	0.687719	0.0195101	-0.175473	0.635972	-0.264336	0.998188
PFLU_3578	putative LacI-family transcriptional regulator	-0.675607	0.264261	-0.563688	0.338363	-0.850991	0.20778	-0.1581	0.807425	-0.175384	0.880364	0.405588	0.998188
PFLU_5256	general secretory pathway, protein-export membrane protein	2.4748	1.95447e-09	1.97931	2.39169e-08	2.2995	5.61274e-09	2.06785	1.56589e-08	-0.175293	0.57829	0.0885478	0.998188
PFLU_5363	putative ECF-family sigma factor	-0.0739598	0.855531	0.45848	0.194871	-0.249134	0.548835	0.0756339	0.854027	-0.175175	0.78083	-0.382846	0.998188
PFLU_1345	livH1, high-affinity branched-chain amino acid ABC transport system, permease	1.2073	1.28371e-05	0.978088	0.000105933	1.03214	8.71015e-05	0.938283	0.000203905	-0.175164	0.582124	-0.0398052	0.998188
PFLU_0485	conserved hypothetical protein	-1.49137	3.2912e-08	-1.75694	3.07515e-09	-1.66636	1.05209e-08	-1.83207	2.66116e-09	-0.174986	0.485663	-0.0751256	0.998188
PFLU_3811	tRNA (5-methylaminomethyl-2-thiouridylate)-methyltransferase	0.963802	2.95709e-05	1.32789	5.72928e-07	0.788877	0.000275186	1.2848	1.06086e-06	-0.174926	0.521437	-0.0430942	0.998188
PFLU_0947	murG, UDP-N-acetylglucosamine--N-acetylmuramyl-(penta pe ptide) pyrophosphoryl-undecaprenol n-acetylglucosamine transferase	-0.961413	0.000101304	-1.77903	8.18925e-08	-1.13629	2.24943e-05	-1.91103	5.22514e-08	-0.174878	0.59611	-0.131992	0.998188
PFLU_1411	conserved hypothetical protein	0.960941	0.000322894	1.3129	1.01559e-05	0.786316	0.00227565	1.225	3.00214e-05	-0.174625	0.611634	-0.0878956	0.998188
PFLU_3464	putative carboxymethylenebutenolidase	-0.843794	2.93176e-05	-1.13798	8.01869e-07	-1.01824	4.23479e-06	-1.113	1.26222e-06	-0.17445	0.481089	0.0249859	0.998188
PFLU_0329	conserved hypothetical protein	1.66556	6.93492e-05	1.74669	3.39073e-05	1.49132	0.000327374	1.93271	1.63501e-05	-0.174237	0.70418	0.186015	0.998188
PFLU_1901	putative cytochrome D oxidase subunit II	-0.629867	0.00174266	-0.692311	0.000714394	-0.803945	0.00025101	-0.831565	0.000162906	-0.174078	0.550814	-0.139255	0.998188
PFLU_4601	conserved hypothetical protein	0.148351	0.221988	0.369508	0.00432645	-0.0254649	0.847447	0.398396	0.00268026	-0.173816	0.359862	0.0288883	0.998188
PFLU_4181	putative dehydrogenase/oxidoreductase	-1.03418	1.62599e-06	-1.51857	1.08711e-08	-1.20783	3.05924e-07	-1.67903	3.98482e-09	-0.173656	0.463888	-0.160459	0.998188
PFLU_1382	putative carbon compunds degradation-related protein	-0.346427	0.0726118	-0.478972	0.0151915	-0.520082	0.012009	-0.388755	0.0496584	-0.173655	0.575193	0.0902168	0.998188
PFLU_1660	putative glycosyltransferase	-0.352397	0.0472254	-0.610296	0.00156928	-0.525815	0.00599585	-0.689907	0.000719524	-0.173418	0.533839	-0.0796108	0.998188
PFLU_5317	putative membrane protein	0.0298628	0.867673	-0.0347809	0.835413	-0.143544	0.408809	-0.0467049	0.790121	-0.173407	0.497847	-0.011924	0.998391
PFLU_5836	conserved hypothetical protein	0.700074	9.55296e-05	0.904469	4.62308e-06	0.526712	0.00167995	0.883023	8.72759e-06	-0.173362	0.423393	-0.0214461	0.998188
PFLU_1141	glpR, glycerol-3-phosphate regulon repressor	-0.0405764	0.746224	-0.10138	0.389596	-0.213824	0.0812792	-0.353041	0.00643212	-0.173248	0.349253	-0.251661	0.741845
PFLU_1941	putative GntR-family regulatory protein	0.874493	8.01536e-05	1.28892	8.37823e-07	0.701313	0.000726828	1.14195	4.07984e-06	-0.17318	0.534495	-0.146968	0.998188
PFLU_3077	putative membrane protein	-0.520623	0.31445	-0.340365	0.499504	-0.693665	0.219546	-0.15661	0.779212	-0.173042	0.861098	0.183755	0.998188
PFLU_4171	response regulatory protein	-0.334171	0.0399865	-0.498883	0.00361417	-0.507072	0.00422653	-0.631822	0.000744021	-0.172901	0.491166	-0.132939	0.998188
PFLU_5796	putative ABC transport system, membrane protein	-1.47016	1.56063e-07	-1.65335	2.86087e-08	-1.64294	5.62706e-08	-1.74562	2.31804e-08	-0.172775	0.547786	-0.0922667	0.998188
PFLU_6032	hupA, DNA-binding protein HU1	-0.562399	0.000787674	-0.91929	4.51158e-06	-0.734919	6.95045e-05	-0.861469	1.02478e-05	-0.172521	0.455996	0.0578217	0.998188
PFLU_5516	rplX, 50S ribosomal protein L24	2.31881	2.73388e-10	2.44679	9.94765e-11	2.14635	8.83411e-10	2.4032	1.40568e-10	-0.172461	0.486612	-0.0435833	0.998188
PFLU_5243	glucose-6-phosphate isomerase	1.10598	2.18523e-07	0.902469	2.14228e-06	0.933909	1.95194e-06	0.936943	1.49307e-06	-0.17207	0.41296	0.0344741	0.998188
PFLU_4370	cell division inhibitor	1.24738	6.16066e-07	1.33917	2.03127e-07	1.07537	4.05847e-06	1.35217	2.00755e-07	-0.172005	0.503565	0.0129985	0.998391
PFLU_1050	putative DNA-binding protein	2.35017	4.1827e-08	2.14985	9.25183e-08	2.1783	1.15406e-07	2.32371	3.89537e-08	-0.171865	0.657231	0.173857	0.998188
PFLU_0419	conserved hypothetical lipoprotein	0.236356	0.393908	-0.679564	0.0204406	0.0645658	0.835297	-0.688248	0.0290088	-0.17179	0.693217	-0.00868364	0.998391
PFLU_5321	putative ATP-dependent protease	-0.280652	0.0451879	-0.746252	2.30298e-05	-0.452203	0.00295171	-0.851497	5.9852e-06	-0.171551	0.425753	-0.105245	0.998188
PFLU_1453	conserved hypothetical protein	-0.0880408	0.601641	-0.441077	0.0097124	-0.259417	0.122313	-0.4958	0.00581856	-0.171377	0.503363	-0.0547224	0.998188
PFLU_0897	putative histidinol-phosphate aminotransferase	0.549211	0.00161116	0.445062	0.00685074	0.377912	0.0219311	0.354887	0.029156	-0.171299	0.473832	-0.0901751	0.998188
PFLU_4901	conserved hypothetical protein	2.13695	6.96795e-09	2.4983	6.2341e-10	1.96581	2.78403e-08	2.34999	1.85989e-09	-0.171139	0.537063	-0.148307	0.998188
PFLU_1133	putative membrane protein	-1.86458	5.49064e-06	-2.43328	2.92826e-07	-2.03542	5.18315e-06	-2.28777	2.01212e-06	-0.170841	0.774192	0.145505	0.998188
PFLU_5241	3-methyl-2-oxobutanoate hydroxymethyltransferase	2.01831	1.58406e-07	2.17102	4.66134e-08	1.84759	6.9239e-07	2.1303	8.46254e-08	-0.170727	0.607964	-0.0407187	0.998188
PFLU_4591	putative GntR-family regulatory protein	0.895724	1.80045e-05	0.947055	7.91731e-06	0.725051	0.000208356	0.881287	2.38744e-05	-0.170674	0.47516	-0.0657686	0.998188
PFLU_3785	conserved hypothetical protein	0.963388	2.16792e-05	1.08646	4.48557e-06	0.792972	0.000214507	1.1328	3.73405e-06	-0.170416	0.510101	0.0463356	0.998188
PFLU_2714	putative sugar kinase	1.21575	8.04519e-06	1.26417	4.2309e-06	1.04574	5.30742e-05	1.42168	1.30178e-06	-0.170011	0.57829	0.157514	0.998188
PFLU_0764	slyD, peptidyl-prolyl cis-trans isomerase	1.96164	2.19735e-09	2.63601	4.12811e-11	1.79198	7.56452e-09	2.56813	6.27292e-11	-0.169661	0.508588	-0.0678875	0.998188
PFLU_4044	putative nucleotide-binding ABC transporter subunit	-0.364173	0.0518554	-1.11669	7.31393e-06	-0.533789	0.00737837	-0.715277	0.000746333	-0.169616	0.569146	0.401413	0.739959
PFLU_6037	putative exported protein	-0.611612	0.00210893	-1.34501	5.81954e-07	-0.781203	0.00027879	-1.48149	1.93021e-07	-0.169591	0.55837	-0.136476	0.998188
PFLU_4870	aromatic amino acid transport protein	0.201405	0.273904	0.593236	0.00258934	0.0318719	0.87629	0.615184	0.00259856	-0.169533	0.552516	0.0219484	0.998188
PFLU_4565	putative P-type cation-transporting ATPase	-0.53141	0.00248514	-0.838517	3.35506e-05	-0.700906	0.000286611	-0.876929	2.77633e-05	-0.169495	0.504057	-0.0384121	0.998188
PFLU_2940	putative exported protein	-0.508447	0.203123	-0.245438	0.529421	-0.677684	0.119123	-0.451971	0.293858	-0.169237	0.819435	-0.206533	0.998188
PFLU_5562	putative phosphoglycolate phosphatase	0.373066	0.0565507	0.432093	0.0270941	0.203949	0.303606	0.2187	0.262418	-0.169118	0.57829	-0.213393	0.998188
PFLU_4753	succinylarginine dihydrolase	-0.256205	0.0739316	-0.783353	1.98701e-05	-0.425293	0.00596417	-0.884205	6.71497e-06	-0.169088	0.44827	-0.100852	0.998188
PFLU_0439	putative chromosome partitioning-related ParA protein	0.490135	0.000428082	0.49802	0.000326459	0.321147	0.0116378	0.342614	0.00721496	-0.168988	0.359862	-0.155406	0.998188
PFLU_2920	putative exported protein	-3.62001	5.48845e-11	-3.00817	2.56023e-10	-3.78867	6.63748e-11	-3.29894	2.01384e-10	-0.168659	0.695808	-0.29077	0.998188
PFLU_0885	putative exported protein	0.383082	0.0198956	0.165939	0.289785	0.21443	0.187406	0.0270193	0.871901	-0.168652	0.490592	-0.13892	0.998188
PFLU_2844	hypothetical protein	1.10139	1.23124e-05	1.43518	3.89098e-07	0.93289	0.000107021	1.35706	1.19282e-06	-0.168502	0.538439	-0.0781157	0.998188
PFLU_3849	putative outer membrane lipoprotein precursor	-0.512493	0.00340367	-0.69733	0.00023397	-0.680859	0.000442341	-0.910817	2.51021e-05	-0.168366	0.510443	-0.213487	0.998188
PFLU_3505	conserved hypothetical protein	0.260181	0.0872883	0.381647	0.0139954	0.0919674	0.56724	0.448442	0.00632526	-0.168214	0.466238	0.0667945	0.998188
PFLU_0433	conserved hypothetical protein	0.0346164	0.831488	0.236374	0.111463	-0.133382	0.397959	0.123833	0.423772	-0.167999	0.472981	-0.112541	0.998188
PFLU_2204	putative alcohol dehydrogenase	-0.215907	0.40935	0.00531538	0.983143	-0.383668	0.162259	0.211925	0.425488	-0.167761	0.689923	0.20661	0.998188
PFLU_4483	putative nicotinate-nucleotide--dimethylbenzimidazole phosphoribosyltransferase	-0.872002	2.01306e-05	-0.863699	1.86194e-05	-1.03972	3.65963e-06	-0.983861	6.1427e-06	-0.167716	0.503565	-0.120162	0.998188
PFLU_2676	putative cell division protein FtsH	1.62958	6.21764e-09	1.67325	3.13611e-09	1.46192	3.13308e-08	1.44874	2.7143e-08	-0.167651	0.452932	-0.224508	0.971241
PFLU_0538	conserved hypothetical protein	1.35654	7.69591e-08	1.95473	5.22416e-10	1.18891	4.62271e-07	1.85728	1.14669e-09	-0.167635	0.473634	-0.0974548	0.998188
PFLU_4313	conserved hypothetical protein	1.39632	2.25617e-07	1.86573	4.26176e-09	1.22871	1.27111e-06	1.89065	4.21178e-09	-0.167613	0.524972	0.0249223	0.998188
PFLU_1063	pdxJ, pyridoxal phosphate biosynthetic protein	0.558383	0.00252861	0.17142	0.303626	0.390786	0.0272153	0.115305	0.507324	-0.167597	0.514737	-0.0561153	0.998188
PFLU_0621	putative GGDEF domain response regulator	-1.40792	2.35344e-06	-2.73625	6.84121e-10	-1.57547	8.1428e-07	-2.84911	7.19016e-10	-0.167552	0.624709	-0.112864	0.998188
PFLU_5974	putative phospholipase D	1.07025	5.91314e-05	1.00766	9.58848e-05	0.902794	0.000428151	1.06038	7.97036e-05	-0.167457	0.599427	0.0527227	0.998188
PFLU_5016	probable membrane transport protein	0.714969	0.000180523	0.502147	0.00337206	0.547676	0.0022868	0.555505	0.0019314	-0.167293	0.486612	0.0533586	0.998188
PFLU_1416	putative CoA transferase family protein	0.361862	0.200035	0.968696	0.00153917	0.194797	0.519338	0.308465	0.291943	-0.167064	0.711833	-0.660231	0.616112
PFLU_0838	tas, NADP(H)-dependt aldo-keto reductase	1.47918	1.33677e-07	1.98286	2.40738e-09	1.31216	6.79128e-07	1.85693	6.42216e-09	-0.167019	0.534495	-0.125927	0.998188
PFLU_2260	conserved hypothetical protein	1.01061	0.0055882	1.00429	0.00532505	0.84363	0.0235325	1.25318	0.00139882	-0.166978	0.738388	0.248888	0.998188
PFLU_3926	DNA-binding protein HU-beta	1.63504	1.05819e-07	1.58781	1.17027e-07	1.46817	4.34309e-07	1.64065	8.3449e-08	-0.166869	0.577161	0.0528357	0.998188
PFLU_5335	putative membrane protein	-1.86865	1.78181e-09	-2.45705	4.62519e-11	-2.03549	8.58234e-10	-2.4942	5.63775e-11	-0.166843	0.505767	-0.0371529	0.998188
PFLU_0602	cobK, precorrin-6A reductase	0.594111	0.0172945	0.973007	0.000339761	0.427387	0.127705	1.34876	1.62166e-05	-0.166724	0.632604	0.375748	0.86393
PFLU_0626	speA, biosynthetic arginine decarboxylase	0.330025	0.0725319	0.357465	0.0494535	0.163433	0.379167	0.466606	0.0140241	-0.166592	0.568949	0.109141	0.998188
PFLU_1476	putative regulatory protein	1.74485	7.86161e-08	1.90045	1.88785e-08	1.57833	3.766e-07	1.89252	2.71015e-08	-0.166516	0.556299	-0.00793156	0.998391
PFLU_5005	thrC, threonine synthase	0.785183	3.95822e-05	0.544297	0.00114415	0.618809	0.000475527	0.489756	0.00296798	-0.166375	0.47412	-0.0545412	0.998188
PFLU_4280	putative membrane protein	0.509333	0.0133678	0.827182	0.000286597	0.342972	0.0917212	0.84584	0.000296532	-0.166361	0.585375	0.0186581	0.998391
PFLU_1835	fabB, 3-oxoacyl-[acyl-carrier-protein] synthase I	-1.26719	5.23729e-06	-1.36077	1.91904e-06	-1.43329	1.44654e-06	-1.53752	4.89974e-07	-0.166101	0.611634	-0.176752	0.998188
PFLU_3512	putative exonuclease	1.2962	0.0001836	1.55695	2.06754e-05	1.1302	0.000971393	1.24591	0.00038574	-0.166006	0.681388	-0.311044	0.998188
PFLU_5790	putative oxidoreductase	-2.15217	3.24889e-10	-2.67318	1.73417e-11	-2.31817	1.77766e-10	-2.17885	2.66021e-10	-0.166002	0.510374	0.494326	0.441773
PFLU_3518	conserved hypothetical protein	0.578609	0.00219072	0.844884	5.81153e-05	0.413059	0.0227681	0.936571	2.48688e-05	-0.16555	0.525727	0.0916874	0.998188
PFLU_5153	putative regulatory protein	0.0833841	0.535988	-0.547538	0.000366546	-0.0819761	0.552493	-0.687599	5.39097e-05	-0.16536	0.418027	-0.140061	0.998188
PFLU_0683	conserved hypothetical protein	1.94664	1.03992e-09	2.45052	3.51632e-11	1.7815	4.41935e-09	2.34941	7.87631e-11	-0.165147	0.45431	-0.101109	0.998188
PFLU_4934	conserved hypothetical protein	-0.475864	0.0048884	-0.363205	0.0227224	-0.640617	0.000574659	-0.342617	0.0342687	-0.164753	0.508449	0.0205879	0.998188
PFLU_4747	aspartokinase	0.376429	0.00876132	0.0874113	0.517266	0.211702	0.123676	0.0632285	0.647252	-0.164727	0.43576	-0.0241828	0.998188
PFLU_1142	glpK, glycerol kinase	-0.787834	0.000533897	-0.790773	0.000460707	-0.952555	0.000102362	-0.826697	0.000342588	-0.164721	0.607115	-0.0359245	0.998188
PFLU_0351	conserved hypothetical protein	2.67788	8.73176e-06	3.24712	4.21715e-07	2.51329	3.18683e-05	2.88664	4.49933e-06	-0.164592	0.750253	-0.360488	0.998188
PFLU_0963	putative exported protein	-3.6765	3.23138e-11	-3.93967	1.08944e-11	-3.84092	3.17849e-11	-4.0799	1.47549e-11	-0.164419	0.673057	-0.140234	0.998188
PFLU_4224	putative esterase	0.247512	0.281862	0.13872	0.544652	0.0831323	0.741276	0.432234	0.0661481	-0.164379	0.648515	0.293514	0.998188
PFLU_5007	protein disulfide isomerase II	1.77915	1.80045e-09	2.06907	1.8325e-10	1.61493	7.29543e-09	1.9079	6.30237e-10	-0.164217	0.463888	-0.16117	0.998188
PFLU_4176	putative membrane protein	-0.293249	0.325808	0.0748466	0.800155	-0.457302	0.15051	0.363788	0.222565	-0.164053	0.747314	0.288941	0.998188
PFLU_4000	putative lipoprotein	0.117556	0.533293	0.16748	0.356655	-0.0462675	0.851469	0.398257	0.0384551	-0.163823	0.568949	0.230777	0.998188
PFLU_3776	putative membrane protein	0.407701	0.0428878	0.0408277	0.839919	0.243897	0.234103	0.152971	0.458027	-0.163804	0.595241	0.112143	0.998188
PFLU_3509	putative exported protein	0.677699	0.00324322	0.229173	0.276648	0.513924	0.0226018	0.518519	0.0212674	-0.163776	0.611634	0.289346	0.990668
PFLU_5404	conserved hypothetical protein	1.03357	1.36178e-06	1.47883	1.07953e-08	0.869808	1.28475e-05	1.38918	3.11406e-08	-0.163759	0.459979	-0.0896478	0.998188
PFLU_0381	conserved hypothetical protein	0.175764	0.414593	-0.112177	0.599934	0.0120319	0.9596	-0.115724	0.609462	-0.163732	0.626503	-0.00354677	0.998705
PFLU_6109	putative phospholipd biosynthesis-related protein	-1.26529	1.45544e-06	-2.57018	2.77728e-10	-1.42896	5.83415e-07	-2.79874	3.46972e-10	-0.163672	0.591194	-0.228564	0.998188
PFLU_2118	conserved hypothetical protein	0.861284	0.00115654	1.08203	0.000120836	0.697622	0.00711654	0.93936	0.000650505	-0.163661	0.645104	-0.142673	0.998188
PFLU_1624	argD, acetylornithine aminotransferase	-0.619537	0.0263537	-0.187084	0.474995	-0.782842	0.0111975	0.118544	0.672745	-0.163305	0.729264	0.305627	0.998188
PFLU_3455	putative membrane protein	0.228233	0.290492	0.0819948	0.707864	0.0649612	0.788439	0.276758	0.216501	-0.163271	0.623639	0.194763	0.998188
PFLU_6007	putative ABC transport system, substrate-binding protein	2.02449	4.44481e-09	0.923652	5.62794e-05	1.86128	1.65041e-08	1.18686	4.49656e-06	-0.163208	0.537155	0.263208	0.990668
PFLU_2025	putative membrane protein	0.107583	0.524938	-0.850455	5.54535e-05	-0.0552056	0.762683	-0.804735	0.000174788	-0.162788	0.527697	0.0457203	0.998188
PFLU_1268	glnD, uridylyltransferase	-0.085128	0.628035	-0.131669	0.429969	-0.247864	0.147676	-0.176627	0.293217	-0.162736	0.546682	-0.044958	0.998188
PFLU_3659	putative exported protein	0.713784	0.00205604	0.553241	0.0112015	0.551238	0.015204	0.338091	0.123454	-0.162546	0.608552	-0.21515	0.998188
PFLU_1867	putative glutathione S-transferase-family protein	2.09466	4.44499e-10	2.13293	2.46139e-10	1.93263	1.605e-09	2.02319	6.31534e-10	-0.16203	0.478975	-0.109747	0.998188
PFLU_3131A	hypothetical protein	-0.51556	0.0513867	-0.370938	0.147796	-0.677305	0.0148392	-0.414034	0.114009	-0.161745	0.713717	-0.0430961	0.998188
PFLU_4888	putative DNA-3-methyladenine glycosylase II	-0.278763	0.114221	-0.127586	0.462884	-0.440485	0.018077	-0.184196	0.295674	-0.161721	0.568949	-0.0566103	0.998188
PFLU_5214	exonuclease V subunit	-0.312492	0.0220115	-0.422745	0.00303648	-0.474161	0.00162249	-0.507182	0.000863673	-0.16167	0.435482	-0.0844371	0.998188
PFLU_0194	putative exported protein	-0.0182693	0.928091	0.330507	0.0635435	-0.179495	0.343827	0.320694	0.0823504	-0.161225	0.574167	-0.0098128	0.998391
PFLU_1339	conserved hypothetical protein	-0.54029	0.0193502	-0.597606	0.010137	-0.70119	0.00560159	-0.702878	0.00592651	-0.1609	0.660933	-0.105272	0.998188
PFLU_4186	dihydrofolate:folylpolyglutamate synthetase; dihydrofolate synthetase	0.346626	0.0209714	0.798189	1.83208e-05	0.185793	0.209114	0.739283	5.07188e-05	-0.160834	0.474828	-0.0589055	0.998188
PFLU_5228	transmembrane permease component of haem ABC transporter	-1.0342	0.000235219	-0.89108	0.000759341	-1.19496	0.000108145	-0.842048	0.00204388	-0.160766	0.696059	0.0490319	0.998188
PFLU_5124	conserved hypothetical protein	0.852832	0.00040772	0.692728	0.00220272	0.69237	0.00309894	0.621535	0.0068027	-0.160462	0.604108	-0.0711927	0.998188
PFLU_1629	putative peptidase	-0.31066	0.131138	-0.687934	0.00229417	-0.470867	0.0305035	-0.58891	0.00888515	-0.160207	0.631378	0.0990245	0.998188
PFLU_5623	glcB, malate synthase G	-0.0517	0.760012	0.111727	0.482711	-0.211889	0.191346	0.0239918	0.884724	-0.160189	0.532652	-0.0877353	0.998188
PFLU_2472	putative AraC-family regulatory protein	-0.0861239	0.655748	-0.296399	0.109149	-0.245956	0.206533	-0.0446791	0.821538	-0.159832	0.588881	0.25172	0.992665
PFLU_0741	putative peptidoglycan biosynthesis protein	1.18105	0.000294154	1.27135	0.000123352	1.02122	0.00144046	1.18222	0.000363759	-0.15983	0.695218	-0.0891345	0.998188
PFLU_4520	conserved hypothetical protein	-0.00114393	0.993839	0.0183107	0.889309	-0.160921	0.229188	-0.0223287	0.870007	-0.159777	0.434901	-0.0406393	0.998188
PFLU_5426	putative nicotinate-nucleotide adenylyltransferase	0.430109	0.00861162	0.661928	0.00024914	0.270531	0.0884273	0.732609	0.0001102	-0.159578	0.504057	0.0706813	0.998188
PFLU_0402	priA, primosomal protein N	-0.778489	4.10926e-05	-0.637384	0.000259251	-0.93801	7.24974e-06	-0.774406	5.11398e-05	-0.159521	0.504057	-0.137022	0.998188
PFLU_0568	putative bacterioferritin	1.5672	3.09634e-06	1.6742	1.17837e-06	1.40776	1.12944e-05	1.91347	2.56562e-07	-0.159438	0.677919	0.239266	0.998188
PFLU_4603	dihydroorotate dehydrogenase	1.25993	5.62894e-07	1.76688	5.59188e-09	1.10067	3.46931e-06	1.74251	8.16097e-09	-0.159255	0.530339	-0.0243766	0.998188
PFLU_3773	biopolymer transport protein	0.269078	0.158967	0.906709	7.78652e-05	0.110125	0.589685	0.603981	0.00402818	-0.158953	0.593765	-0.302729	0.924798
PFLU_4174	putative pyrrolidone-carboxylate peptidase	0.0217825	0.927893	0.00981586	0.963632	-0.137017	0.55209	-0.0145235	0.950067	-0.1588	0.642093	-0.0243394	0.998188
PFLU_4172	sensor kinase protein	-0.404696	0.00592989	-0.637765	0.000120598	-0.563275	0.000550921	-0.753325	3.01111e-05	-0.15858	0.465779	-0.115561	0.998188
PFLU_4878	conserved hypothetical protein	-0.412649	0.00563896	-0.747304	2.57312e-05	-0.571028	0.000514219	-0.701537	6.46689e-05	-0.158379	0.471559	0.0457677	0.998188
PFLU_4312	BolA protein	1.11012	5.93802e-07	1.46993	1.21075e-08	0.951772	4.74921e-06	1.29362	8.46254e-08	-0.158344	0.473832	-0.176308	0.998188
PFLU_2109	codA, cytosine deaminase	-1.3119	3.32559e-06	-1.35146	1.98751e-06	-1.47023	1.39482e-06	-1.04512	4.93672e-05	-0.158335	0.639362	0.306339	0.990668
PFLU_4177	putative lipoprotein	0.894539	0.00077083	0.646168	0.00867012	0.736272	0.00501339	0.708664	0.00677768	-0.158267	0.639863	0.0624966	0.998188
PFLU_2585	putative permease component of ABC transporter	0.710478	0.00375025	1.05662	0.000104227	0.552217	0.0203554	1.03919	0.000147851	-0.158261	0.655835	-0.0174339	0.998391
PFLU_2234	putative ABC transport system, membrane protein	-0.628861	0.373367	-0.798757	0.255466	-0.78654	0.311531	-0.299396	0.695712	-0.157679	0.906065	0.499361	0.998188
PFLU_0939	mraW, S-adenosyl-methyltransferase	-1.09176	0.000230712	-1.73485	1.50281e-06	-1.24927	7.44958e-05	-2.10203	2.11298e-07	-0.157505	0.706549	-0.367178	0.990668
PFLU_3463	conserved hypothetical protein	0.511685	0.0232432	0.424697	0.0522269	0.354234	0.117588	0.3471	0.122447	-0.157451	0.642093	-0.0775965	0.998188
PFLU_1666	putative 3-oxoacyl-(Acyl-carrier-protein) synthase III	-1.20534	5.42506e-07	-1.77132	3.55783e-09	-1.36265	1.67962e-07	-1.68363	1.06715e-08	-0.15731	0.542726	0.0876875	0.998188
PFLU_4341	conserved hypothetical protein	-0.883132	2.15815e-06	-0.738701	1.36921e-05	-1.04035	4.03206e-07	-0.816795	5.84294e-06	-0.157214	0.448653	-0.0780944	0.998188
PFLU_5802	putative symporter membrane protein	1.54251	1.87408e-05	3.03441	2.19122e-09	1.38606	8.59418e-05	3.03642	2.77336e-09	-0.156445	0.68739	0.00201329	0.998705
PFLU_1649	rpsA, 30S ribosomal protein S1	2.46187	6.47604e-10	3.36261	1.21201e-11	2.30551	1.63352e-09	3.31687	1.57315e-11	-0.156362	0.602334	-0.0457414	0.998188
PFLU_1209	putative betaine aldehyde dehydrogenase	-1.18596	9.93509e-06	-1.92991	2.56749e-08	-1.34219	3.04901e-06	-1.83133	6.7816e-08	-0.156237	0.633159	0.0985801	0.998188
PFLU_2374	araH, L-arabinose ABC transport system permease protein	0.639076	0.0182256	1.01972	0.000561652	0.483012	0.0739355	0.788301	0.00540581	-0.156064	0.709219	-0.231416	0.998188
PFLU_6046	putative phosphate ABC transport system, membrane protein	0.217677	0.140657	0.248847	0.0878814	0.0619347	0.695383	0.221632	0.138008	-0.155742	0.49368	-0.0272149	0.998188
PFLU_4141	MerR-family transcriptional regulator	0.150794	0.373273	0.0285151	0.866474	-0.00476412	0.978216	0.0575515	0.738724	-0.155558	0.563281	0.0290363	0.998188
PFLU_1332	nhaA, Na(+)/H(+) antiporter	-1.12796	3.10158e-07	-1.53049	5.21428e-09	-1.28332	8.50738e-08	-1.6437	3.26835e-09	-0.15536	0.495866	-0.113211	0.998188
PFLU_3840	putative membrane protein	-0.100742	0.447695	0.113324	0.379117	-0.256052	0.0597535	-0.108404	0.416212	-0.15531	0.446003	-0.221727	0.923089
PFLU_4738	conserved hypothetical protein	-1.477	1.11112e-07	-2.12202	9.15535e-10	-1.63185	3.96522e-08	-2.2639	5.72384e-10	-0.154847	0.57762	-0.141887	0.998188
PFLU_4987	chaperone Hsp60, peptide-dependent ATPase, heat shock protein	3.76132	5.34289e-11	3.82653	2.94868e-11	3.60647	9.43964e-11	3.50861	8.65893e-11	-0.154847	0.661587	-0.317925	0.990668
PFLU_1778	phnD, phosphonates ABC transport system, substrate-binding periplasmic protein precursor	-0.0286378	0.969529	0.809238	0.162369	-0.183408	0.808258	0.78075	0.217589	-0.15477	0.887243	-0.0284878	0.998391
PFLU_3730	putative short-chain dehydrogenase/reductase	0.380952	0.00917358	0.281722	0.0424839	0.226241	0.112479	0.131539	0.352881	-0.154711	0.465743	-0.150183	0.998188
PFLU_4321	putative cyanophycin synthetase	1.63955	3.23398e-06	2.10579	1.30804e-07	1.48497	1.15143e-05	2.37101	3.33371e-08	-0.154585	0.695808	0.265218	0.998188
PFLU_0613	fis, DNA-binding protein	0.398838	0.276212	0.649133	0.069482	0.244328	0.543266	0.481093	0.209922	-0.15451	0.795234	-0.16804	0.998188
PFLU_3634	AraC-family transcriptional regulator	0.659357	0.000394971	0.767451	7.76738e-05	0.504917	0.00409715	0.767753	9.59043e-05	-0.154441	0.530006	0.000302005	0.999038
PFLU_5696	conserved hypothetical protein	-0.524768	0.0476843	-0.579994	0.0285005	-0.67908	0.0181618	-0.502784	0.0709052	-0.154312	0.730126	0.0772098	0.998188
PFLU_2847	hypothetical protein	0.163024	0.446241	-0.283569	0.182525	0.00878244	0.969893	-0.00564376	0.981845	-0.154241	0.639408	0.277925	0.998188
PFLU_0960	putative conserved membrane protein	-0.657963	0.000223303	-0.573936	0.000681992	-0.812115	3.73077e-05	-0.585383	0.000774226	-0.154152	0.521437	-0.0114467	0.998391
PFLU_1144	conserved hypothetical protein	0.408733	0.0464697	-0.162272	0.422301	0.25469	0.220613	-0.318323	0.131893	-0.154043	0.62767	-0.156051	0.998188
PFLU_1035	sdaA, L-serine dehydratase 1	-1.90528	1.62551e-07	-1.55753	1.24904e-06	-2.05925	1.54008e-07	-1.07462	0.000120781	-0.15397	0.717176	0.482917	0.76753
PFLU_2779	putative membrane protein	0.745734	0.000183294	0.778432	0.000103575	0.591812	0.00191654	0.757326	0.000197943	-0.153922	0.534495	-0.0211061	0.998391
PFLU_4559	putative cytochrome oxidase subunit	-1.63653	6.52956e-09	-2.17559	1.39608e-10	-1.79041	2.5201e-09	-2.2326	1.17866e-10	-0.153882	0.522591	-0.0570045	0.998188
PFLU_0971	putative fusaric acid resistance protein fusion	-0.602593	0.0258343	-0.698531	0.0108422	-0.756439	0.0101756	-0.974284	0.00208219	-0.153846	0.738388	-0.275753	0.998188
PFLU_4586	hypothetical protein	0.618541	0.00275901	0.661418	0.00145457	0.465214	0.0206248	0.593176	0.00437579	-0.153327	0.598362	-0.0682416	0.998188
PFLU_0878	putative phosphocarrier protein	0.90065	0.000975627	0.532609	0.0315299	0.747365	0.00578304	0.0252167	0.927497	-0.153284	0.664572	-0.507392	0.739959
PFLU_5939	conserved hypothetical protein	-0.686634	2.96677e-05	-1.34345	6.87445e-09	-0.839904	3.48211e-06	-1.29913	1.25088e-08	-0.153269	0.446003	0.0443245	0.998188
PFLU_1267	putative aminotransferase	0.393399	0.0181791	0.592546	0.000941145	0.240326	0.143808	0.625374	0.000712966	-0.153073	0.539451	0.0328279	0.998188
PFLU_4621	conserved hypothetical protein	0.05511	0.770504	-0.0986623	0.581344	-0.0975148	0.602745	-0.0981935	0.591939	-0.152625	0.600739	0.000468771	0.998705
PFLU_1244	conserved hypothetical protein	-0.370585	0.183318	-0.656829	0.0218431	-0.523158	0.0720852	-0.467124	0.103701	-0.152574	0.752685	0.189705	0.998188
PFLU_4148	putative threonyl-tRNA synthetase	0.555699	0.00373312	0.554925	0.00338653	0.403372	0.0271886	0.56075	0.0033398	-0.152328	0.593203	0.00582538	0.998391
PFLU_0531	rlmB, 23s rRNA (guanosine-2-o-)-methyltransferase	-1.17724	9.20926e-07	-1.67905	8.76852e-09	-1.32955	2.59988e-07	-1.75591	6.54227e-09	-0.152305	0.562648	-0.0768541	0.998188
PFLU_0769	lspA, lipoprotein signal peptidase	1.17538	6.05064e-06	1.20849	3.58724e-06	1.02327	4.01124e-05	1.23504	4.04253e-06	-0.152113	0.587676	0.0265567	0.998188
PFLU_4539	putative 3-oxoacyl-[acyl-carrier-protein] synthase III	1.28474	2.29119e-07	1.58365	1.23355e-08	1.13268	1.24457e-06	1.51024	2.60607e-08	-0.15206	0.537155	-0.073416	0.998188
PFLU_0512	orn, oligoribonuclease	0.548125	0.0012959	0.734439	7.33174e-05	0.396233	0.0147551	0.645227	0.000341204	-0.151892	0.51333	-0.0892128	0.998188
PFLU_1202	putative acetyltransferase	-1.67534	1.33905e-08	-2.67389	3.85625e-11	-1.82716	7.01913e-09	-2.8047	5.04058e-11	-0.151819	0.583174	-0.13081	0.998188
PFLU_0760	cysD, sulfate adenylyltransferase subunit 2	2.07518	1.02643e-07	2.98617	6.784e-10	1.92365	3.32025e-07	2.87606	1.32606e-09	-0.151532	0.661475	-0.110114	0.998188
PFLU_1665	putative transferase	-1.10295	5.19935e-05	-1.72771	2.96684e-07	-1.25427	1.80949e-05	-1.48128	2.71418e-06	-0.151313	0.675359	0.246432	0.998188
PFLU_2763	1,4-alpha-glucan branching enzyme	-0.739583	0.00198897	-0.581498	0.00955903	-0.890461	0.000460516	-0.478314	0.029281	-0.150878	0.669255	0.103185	0.998188
PFLU_3947	putative copper resistance protein D	-0.226033	0.232633	-0.422284	0.0286267	-0.376866	0.0600363	-0.394228	0.0498717	-0.150833	0.621909	0.0280558	0.998188
PFLU_0734	putative outer-membrane lipoprotein	0.472781	0.0225557	0.260824	0.18854	0.321991	0.119008	0.17785	0.386037	-0.15079	0.635194	-0.0829741	0.998188
PFLU_4548	putative methyl-accepting chemotaxis protein	-0.416384	0.123146	-0.341473	0.196049	-0.567025	0.0512366	-0.0767856	0.788103	-0.150641	0.745674	0.264687	0.998188
PFLU_5949	putative hydrolase	-0.604572	0.000150313	-0.89478	1.86142e-06	-0.75519	2.17745e-05	-0.951345	1.56473e-06	-0.150617	0.473795	-0.0565657	0.998188
PFLU_4883	putative exported protein	-3.03159	5.15254e-12	-3.41979	9.21786e-13	-3.18217	4.24385e-12	-3.31854	1.66515e-12	-0.150587	0.556299	0.101245	0.998188
PFLU_4754	succinylglutamic semialdehyde dehydrogenase	-0.196735	0.123948	-0.762758	7.85151e-06	-0.347281	0.0107947	-0.910742	1.27252e-06	-0.150546	0.452849	-0.147984	0.998188
PFLU_1798	putative ABC transport system, membrane protein	-0.359641	0.249674	-0.109121	0.725061	-0.510167	0.132695	0.14188	0.666987	-0.150525	0.783473	0.251001	0.998188
PFLU_3793	conserved hypothetical protein	1.73954	9.22397e-05	1.66887	0.000128389	1.58918	0.000381846	1.44472	0.00109426	-0.15036	0.75313	-0.224145	0.998188
PFLU_2980	putative cytochrome C	-1.68355	1.31438e-07	-1.6452	1.34483e-07	-1.83388	8.39974e-08	-1.38119	1.91853e-06	-0.150326	0.660815	0.264006	0.998188
PFLU_0445	putative potassium efflux system protein	0.177266	0.179221	0.0745895	0.570779	0.0269632	0.851469	0.141946	0.282213	-0.150303	0.467527	0.0673564	0.998188
PFLU_2161	putative LysR-family regulatory protein	-0.123784	0.577693	-0.0580367	0.789903	-0.274034	0.228456	-0.240953	0.28813	-0.15025	0.662799	-0.182916	0.998188
PFLU_1707	putative 2-dehydropantoate 2-reductase	0.365655	0.0520446	0.501377	0.00931703	0.215507	0.255682	0.640093	0.0019579	-0.150149	0.608963	0.138717	0.998188
PFLU_3259	hypothetical protein	0.263488	0.478741	1.07215	0.0040383	0.113375	0.785238	1.02982	0.00800616	-0.150112	0.807132	-0.0423286	0.998188
PFLU_1306	putative ATP-dependent helicase	0.585887	0.00184138	0.534513	0.00333458	0.436102	0.0153673	0.757209	0.000200286	-0.149786	0.574167	0.222696	0.992665
PFLU_1854	putative GntR-family regulatory protein	-1.49755	3.57529e-05	-1.63648	1.18748e-05	-1.64717	1.69228e-05	-1.96585	2.28795e-06	-0.149616	0.766376	-0.329372	0.998188
PFLU_4503	conserved hypothetical protein	0.491168	0.00508235	0.850103	3.34371e-05	0.341633	0.0425148	0.641812	0.000618824	-0.149535	0.563281	-0.208291	0.998188
PFLU_2092	conserved hypothetical protein	0.122197	0.495797	-0.205706	0.238435	-0.0271454	0.888638	-0.318658	0.0807989	-0.149343	0.595958	-0.112952	0.998188
PFLU_5992	conserved hypothetical protein	1.07501	9.21968e-06	1.3301	5.82964e-07	0.925976	6.12499e-05	1.33084	7.64336e-07	-0.149032	0.585462	0.000740496	0.998705
PFLU_5762	pilT, twitching mobility protein	-0.418643	0.0142804	-0.524149	0.00303887	-0.567505	0.00247985	-0.515086	0.00493662	-0.148862	0.575193	0.00906317	0.998391
PFLU_5768	conserved hypothetical protein	1.30714	8.37735e-05	1.28804	8.43932e-05	1.15838	0.000382875	1.25554	0.000166793	-0.148762	0.707691	-0.0325044	0.998188
PFLU_5291A	conserved hypothetical protein (pseudogene)	1.03067	0.000889757	0.951136	0.00162118	0.882279	0.00464547	0.785361	0.0109185	-0.148396	0.704977	-0.165775	0.998188
PFLU_0521	hflX, GTP-binding protein HflX	-1.00128	7.52026e-07	-1.58691	1.70457e-09	-1.14965	1.57468e-07	-1.67212	1.02621e-09	-0.14837	0.486874	-0.0852028	0.998188
PFLU_4552	conserved hypothetical protein	-1.19831	0.000108676	-0.821811	0.00232054	-1.34633	6.56269e-05	-0.554985	0.0344185	-0.148024	0.750575	0.266826	0.998188
PFLU_0735	conserved hypothetical protein	0.927133	6.86654e-06	0.586987	0.000637782	0.779284	5.30601e-05	0.600408	0.000574346	-0.14785	0.533456	0.0134218	0.998391
PFLU_3839	putative membrane protein	1.00321	7.66371e-05	1.08596	2.71086e-05	0.85541	0.000517832	0.992125	0.000114609	-0.147795	0.623486	-0.0938323	0.998188
PFLU_5493	putative hydrolase	-0.589524	0.254776	-0.497821	0.327847	-0.737284	0.171841	-0.830587	0.123834	-0.14776	0.880364	-0.332766	0.998188
PFLU_1972	topB, DNA topoisomerase III	-0.46679	0.112069	-0.52214	0.0728218	-0.614515	0.0535978	-0.328252	0.286222	-0.147724	0.777129	0.193888	0.998188
PFLU_4416	chemotaxis protein CheY	-4.206	1.85562e-12	-5.40164	1.80026e-13	-4.35353	1.74742e-12	-5.21266	2.66341e-13	-0.147527	0.624655	0.188979	0.998188
PFLU_0461	putative glutamate-ammonia-ligase adenylyltransferase	0.52318	0.000525386	0.695542	2.65195e-05	0.375691	0.00743889	0.592841	0.000157752	-0.147489	0.469398	-0.102701	0.998188
PFLU_2994	putative EAL domain signalling protein	-0.658171	0.0140647	-1.64933	4.48557e-06	-0.805631	0.00452564	-1.55962	1.28734e-05	-0.14746	0.739896	0.0897069	0.998188
PFLU_1352	rapA, RNA polymerase associated protein	0.49589	0.0113251	0.763582	0.000386675	0.348654	0.066581	0.628518	0.0021607	-0.147236	0.624611	-0.135064	0.998188
PFLU_1511	putative transport related membrane protein	0.38915	0.0664248	0.417304	0.0465727	0.242013	0.258303	0.476959	0.0278295	-0.147136	0.660303	0.0596553	0.998188
PFLU_5474	conserved hypothetical protein	1.55805	2.86038e-06	1.89641	1.87929e-07	1.411	1.25854e-05	1.73966	8.44156e-07	-0.147042	0.661764	-0.156746	0.998188
PFLU_3118	putative sugar ABC transport system, membrane protein	0.636342	0.00779743	0.275524	0.215812	0.48932	0.0372566	0.450576	0.0517993	-0.147022	0.679123	0.175051	0.998188
PFLU_1736	putative two-component system, sensor kinase	-0.592282	0.00126365	-0.712977	0.000219816	-0.739123	0.000230185	-0.782689	0.000124779	-0.146841	0.582336	-0.0697116	0.998188
PFLU_0763	pta, phosphate acetyltransferase	0.557235	0.000108173	0.767336	2.61217e-06	0.410592	0.00199889	0.604888	4.88894e-05	-0.146644	0.41501	-0.162449	0.990668
PFLU_5289	putative integrase (pseudogene)	0.569894	0.00214193	0.761324	0.000138954	0.423343	0.0193057	0.731318	0.000302446	-0.146551	0.567114	-0.030006	0.998188
PFLU_3023	putative two-component sensor histidine kinase	0.945935	0.000298484	0.780684	0.00141702	0.799398	0.0014553	1.0472	0.000111148	-0.146537	0.678682	0.266519	0.998188
PFLU_2131	hypothetical protein	-0.988384	6.52534e-05	-1.37133	1.64688e-06	-1.13491	2.60732e-05	-1.28185	7.45769e-06	-0.146524	0.661226	0.0894802	0.998188
PFLU_0158	hypothetical protein	1.54213	0.0226184	1.77852	0.00796258	1.39564	0.0512937	1.67173	0.019894	-0.146486	0.872443	-0.10679	0.998188
PFLU_2580	myo-inositol 2-dehydrogenase	0.559202	0.022499	0.40441	0.0853566	0.412947	0.0883201	0.428148	0.0744762	-0.146254	0.707691	0.0237382	0.998391
PFLU_4983	putative two-component system, sensor kinase	0.646548	0.0179935	0.54464	0.0398487	0.500365	0.0691483	0.322698	0.23777	-0.146183	0.727025	-0.221942	0.998188
PFLU_2653	pyruvate dehydrogenase [cytochrome]	0.960548	0.000100615	1.39341	1.35375e-06	0.814489	0.000542134	1.55989	3.89271e-07	-0.14606	0.647552	0.166481	0.998188
PFLU_0762	putaive acyltransferase	1.14628	0.000366646	0.989312	0.00124514	1.00023	0.00173697	0.990541	0.00189468	-0.146049	0.717157	0.00122857	0.998705
PFLU_4622	putative GntR family transcriptional regulator	2.12806	2.72982e-06	2.43076	4.8693e-07	1.98213	6.60469e-06	2.32892	8.73122e-07	-0.145933	0.785411	-0.101841	0.998188
PFLU_5751	pilH, type IV pilus response regulator/twitching mobility protein	0.196714	0.214584	0.178709	0.252409	0.0507874	0.768946	0.277805	0.0838811	-0.145926	0.562579	0.0990966	0.998188
PFLU_4486	putative cobyric acid synthase protein	-0.895312	1.81786e-05	-1.0024	4.33842e-06	-1.04069	4.94563e-06	-1.05361	4.04213e-06	-0.145383	0.58009	-0.0512125	0.998188
PFLU_5906	putative ABC transport system, ATP-binding protein	0.130993	0.631767	-0.452021	0.0874676	-0.0143789	0.960329	0.157778	0.563013	-0.145372	0.741765	0.6098	0.703454
PFLU_0042	osmC, osmotically inducible protein c	0.514515	0.233435	0.0928759	0.831329	0.369176	0.401302	0.553019	0.196051	-0.145339	0.857536	0.460143	0.998188
PFLU_0199	putative ABC sulfur transport system, ATP-binding protein	-0.606987	0.149781	-0.188206	0.643962	-0.752288	0.103188	-0.233166	0.605537	-0.145301	0.857677	-0.0449601	0.998188
PFLU_5418	conserved hypothetical protein	-0.231582	0.185724	-0.739587	0.000314096	-0.376749	0.0387168	-0.718718	0.000514463	-0.145167	0.610563	0.0208688	0.998188
PFLU_3435	putative MarR family transcriptional regulator	2.04426	6.16066e-07	3.02797	2.37422e-09	1.89926	2.1497e-06	2.49704	4.55836e-08	-0.145002	0.704956	-0.53093	0.659228
PFLU_0687	conserved hypothetical protein	-0.678823	0.000154664	-0.316948	0.0330548	-0.823705	3.09312e-05	-0.369192	0.0180687	-0.144882	0.547786	-0.0522448	0.998188
PFLU_1426	putative membrane protein	-0.0396521	0.845106	-0.0206334	0.912635	-0.184432	0.354619	-0.203746	0.305018	-0.14478	0.624709	-0.183112	0.998188
PFLU_1206	hypothetical protein	-1.3395	0.000246239	-2.04082	3.43983e-06	-1.48423	0.000148147	-1.65689	5.64754e-05	-0.144732	0.802949	0.383932	0.998188
PFLU_3746	probable ATP-binding ABC transporter protein	-3.70344	8.89156e-11	-5.00448	2.8388e-12	-3.84809	6.81445e-11	-4.8316	4.72296e-12	-0.14465	0.707691	0.172883	0.998188
PFLU_0232	putative lipoprotein	0.006281	0.9713	-0.0960541	0.514173	-0.137626	0.367231	-0.0114082	0.941715	-0.143907	0.537155	0.0846459	0.998188
PFLU_3155	putative helicase	0.88478	0.000143832	1.48919	2.83694e-07	0.741266	0.000971166	1.58996	1.62466e-07	-0.143513	0.62303	0.100772	0.998188
PFLU_0941	putative peptidoglycan glycosyltransferase, cell division-realted protein	-0.93403	9.17743e-05	-1.55558	2.48252e-07	-1.0775	2.44267e-05	-1.79607	5.50785e-08	-0.143468	0.649521	-0.240495	0.998188
PFLU_3683	putative class II aldolase	0.162497	0.601242	0.814383	0.0074924	0.0190351	0.955542	0.867227	0.00685597	-0.143462	0.773689	0.0528438	0.998188
PFLU_4354	putative MarR-family regulatory protein	0.66548	0.0648937	0.574263	0.104566	0.522072	0.170399	0.51091	0.182268	-0.143408	0.798311	-0.063353	0.998188
PFLU_3425	putative nitrite reductase [NAD(P)H]	4.06955	1.57597e-07	3.96549	1.65862e-07	3.92651	2.68231e-07	4.21303	8.93912e-08	-0.143039	0.851192	0.247542	0.998188
PFLU_3015	putative cell envelope protein	0.154935	0.299009	-0.135555	0.357236	0.0120054	0.942004	-0.162482	0.281189	-0.14293	0.542189	-0.026927	0.998188
PFLU_3629	hypothetical protein	-0.150677	0.691281	0.111293	0.756474	-0.29331	0.45608	0.187935	0.623081	-0.142633	0.825943	0.076642	0.998188
PFLU_0324	putative exported protein	0.581621	0.000167078	0.90826	9.96271e-07	0.44001	0.00213819	0.765242	8.56204e-06	-0.141611	0.478975	-0.143018	0.998188
PFLU_4584	putative phage-related protein	1.17007	7.78026e-06	0.287812	0.1375	1.02849	4.1768e-05	0.57207	0.00705634	-0.141575	0.630246	0.284258	0.990668
PFLU_4517	putative exported protein	2.01551	1.05475e-05	2.39993	1.0474e-06	1.87395	3.1342e-05	2.41183	1.27955e-06	-0.141556	0.783565	0.0119096	0.998391
PFLU_0486	putative oxidoreductase	-0.922843	1.05878e-05	-1.13207	8.30332e-07	-1.06436	2.81101e-06	-1.06497	2.41168e-06	-0.141517	0.582106	0.0671008	0.998188
PFLU_1207	mdoD, glucans biosynthesis protein D precursor	-0.365669	0.0350109	-0.871064	4.25969e-05	-0.506923	0.00585233	-0.876177	4.6835e-05	-0.141255	0.608552	-0.0051137	0.998391
PFLU_2135	conserved hypothetical protein	1.40216	9.77584e-08	1.68075	6.71653e-09	1.26096	4.77035e-07	1.61316	1.5003e-08	-0.141201	0.55996	-0.0675968	0.998188
PFLU_2921	putative membrane protein	-3.3311	1.86956e-10	-2.23116	1.01423e-08	-3.47229	2.77085e-10	-2.39721	1.02615e-08	-0.141188	0.772587	-0.166056	0.998188
PFLU_5581	glpE, thiosulfate sulfurtransferase glpe (ec 2.8.1.1)	-0.640186	0.000750547	-1.19456	1.01557e-06	-0.781263	0.000166749	-1.14632	2.83218e-06	-0.141077	0.605972	0.0482337	0.998188
PFLU_5881	conserved hypothetical protein	1.11379	1.00661e-06	1.25951	1.72306e-07	0.972743	5.98749e-06	1.22058	3.10325e-07	-0.141043	0.556299	-0.0389292	0.998188
PFLU_5753	gshB, glutathione synthetase	0.0522257	0.719255	0.0544451	0.694621	-0.0887347	0.53888	-0.00231142	0.987963	-0.14096	0.515538	-0.0567565	0.998188
PFLU_0017	fmt, methionyl-tRNA formyltransferase	1.84151	4.2764e-07	2.34248	1.30629e-08	1.70061	1.63018e-06	2.22788	3.66366e-08	-0.140905	0.673549	-0.114594	0.998188
PFLU_3130	putative sensory box GGDEF/EAL domain protein	-1.78317	0.00017373	-3.0066	8.37823e-07	-1.924	0.000114093	-3.24671	6.99279e-07	-0.140826	0.851754	-0.24011	0.998188
PFLU_4402	conserved hypothetical protein	0.040981	0.829864	-0.377606	0.0352116	-0.0997622	0.590278	-0.357512	0.0495788	-0.140743	0.623486	0.0200939	0.998188
PFLU_3498	putative exported protein	0.226194	0.831188	2.6491	0.00646789	0.0854859	0.940047	0.00450668	0.996807	-0.140708	0.939813	-2.64459	0.480161
PFLU_5986	putative phosphomannomutase/phosphoglucomutase	0.130501	0.433857	0.128519	0.430044	-0.0101161	0.954981	0.226538	0.164915	-0.140617	0.599137	0.0980189	0.998188
PFLU_1917	putative traC-like DNA primase	1.05644	0.00422455	1.53585	0.000123749	0.915907	0.0145014	1.47519	0.000295267	-0.140534	0.785411	-0.0606577	0.998188
PFLU_1417	putative hydroxymethylglutaryl-CoA lyase	0.10774	0.721573	0.654004	0.0230521	-0.0327638	0.920902	0.151405	0.618602	-0.140503	0.774192	-0.502599	0.869376
PFLU_0100	putative membrane-bound peptidase	-0.337984	0.0208463	-0.520055	0.00102814	-0.478341	0.00277541	-0.316128	0.0322776	-0.140357	0.533217	0.203927	0.990668
PFLU_4154	putative inosine-uridine preferring nucleoside hydrolase	-0.328917	0.0380211	-0.635882	0.000406659	-0.469243	0.00591525	-0.764904	9.54967e-05	-0.140326	0.577161	-0.129023	0.998188
PFLU_1489	citA, citrate-proton symporter	0.271691	0.0836576	-0.00933209	0.952043	0.131424	0.409683	0.11463	0.464635	-0.140267	0.575193	0.123962	0.998188
PFLU_5325	putative transcription elongation factor	-0.555962	0.00167811	-0.407413	0.0128291	-0.69613	0.000291948	-0.33399	0.0399144	-0.140168	0.587294	0.0734227	0.998188
PFLU_3134	conserved hypothetical protein	1.07005	0.000197554	1.6221	1.71414e-06	0.92994	0.000854708	1.71795	1.05385e-06	-0.14011	0.712077	0.0958532	0.998188
PFLU_3790	conserved hypothetical protein	0.452181	0.00395984	0.534921	0.000944029	0.312247	0.0394506	0.20393	0.167837	-0.139934	0.530339	-0.330992	0.703454
PFLU_2458	conserved hypothetical protein	0.0764172	0.681842	0.0127911	0.943429	-0.0634078	0.74798	0.00317298	0.987683	-0.139825	0.620984	-0.00961811	0.998391
PFLU_1490	putative GntR-family regulatory protein	1.64829	1.50235e-06	3.68351	4.91566e-11	1.50854	5.31942e-06	3.74681	4.51233e-11	-0.139751	0.698663	0.0632952	0.998188
PFLU_6040	phoR, phosphate regulon two-component system, sensor kinase	-0.91418	0.000662627	-1.50912	4.13215e-06	-1.05386	0.000268488	-1.40565	1.72197e-05	-0.139678	0.732656	0.103468	0.998188
PFLU_0026	putative ABC transport system, substrate-binding protein	-0.630569	0.0143275	-1.06435	0.000278568	-0.76963	0.00557788	-0.563588	0.0311776	-0.139061	0.749051	0.500765	0.838458
PFLU_4498	conserved hypothetical protein	-0.0942555	0.534847	-0.31354	0.0362858	-0.233227	0.123337	-0.48521	0.00310451	-0.138972	0.560112	-0.17167	0.998188
PFLU_5155	putative MerR-family transcriptional regulator	0.65602	0.00146881	0.214056	0.239137	0.517061	0.00900663	0.0364609	0.850219	-0.138959	0.636797	-0.177595	0.998188
PFLU_2142	putative lipoprotein	-0.0919691	0.648751	-0.821802	0.000371866	-0.230765	0.2532	-1.1622	2.66579e-05	-0.138796	0.655917	-0.340396	0.9669
PFLU_4689	hypothetical protein	0.271521	0.29463	0.519912	0.0447036	0.132762	0.620388	0.702855	0.00962163	-0.138758	0.756582	0.182944	0.998188
PFLU_4944	putative membrane protein	0.66349	0.036241	0.422121	0.172859	0.524767	0.110158	0.546021	0.097573	-0.138723	0.778178	0.1239	0.998188
PFLU_2568	putative oxidoreductase	-1.31511	1.14927e-06	-1.53224	1.49114e-07	-1.45381	4.80682e-07	-1.63934	9.64416e-08	-0.138695	0.648608	-0.107095	0.998188
PFLU_5496	ssb, single-strand binding protein	-0.248985	0.0807117	-0.366974	0.0121909	-0.387364	0.0102172	-0.538051	0.00083877	-0.13838	0.539042	-0.171077	0.998188
PFLU_5837	putative exported protein	0.0162522	0.960479	-0.119311	0.675971	-0.122085	0.697366	0.2267	0.444911	-0.138337	0.770374	0.346011	0.998188
PFLU_4775	putative multidrug resistance protein (pseudogene)	-0.555616	0.277053	0.110855	0.818704	-0.693604	0.218881	0.278012	0.591939	-0.137988	0.886325	0.167158	0.998188
PFLU_3799	conserevd hypothetical protein	0.0770556	0.578748	0.0347081	0.799451	-0.06041	0.671261	-0.114394	0.401472	-0.137466	0.514737	-0.149102	0.998188
PFLU_6030	putative membrane protein	0.3834	0.00403757	0.0578495	0.639447	0.24603	0.0526475	0.0743404	0.554772	-0.13737	0.472941	0.016491	0.998188
PFLU_5207	putative membrane protein	0.00341885	0.99054	0.231665	0.324446	-0.133939	0.609588	-0.0486368	0.853589	-0.137358	0.730051	-0.280301	0.998188
PFLU_2905	hypothetical protein	-0.381913	0.0433379	-0.58119	0.00365116	-0.519245	0.0104242	-0.627953	0.00292357	-0.137332	0.64952	-0.0467629	0.998188
PFLU_3359	hypothetical protein	-1.94358	1.15785e-08	-3.07479	3.47628e-11	-2.0809	5.68236e-09	-3.08296	3.942e-11	-0.137315	0.649521	-0.0081723	0.998391
PFLU_2145	putative glutathione S-transferase family protein	1.08425	1.11393e-05	1.38923	4.55912e-07	0.947152	6.51388e-05	1.42646	4.34983e-07	-0.137099	0.624467	0.0372297	0.998188
PFLU_3615	putative protease	0.857524	0.00292638	1.42453	2.30298e-05	0.720565	0.0105407	1.74284	2.73126e-06	-0.136959	0.756582	0.318315	0.998188
PFLU_5993	gmk, guanylate kinase	0.61813	0.000631592	0.730023	0.000113871	0.48142	0.00541489	0.691978	0.000247724	-0.136709	0.577229	-0.0380453	0.998188
[truncated: 3,974 more rows]
