# Supplementary material for: The genotype of barley cultivars influences multiple aspects of their associated microbiota via differential root exudate secretion
Source: PLoS Biol. 2024 Apr 25;22(4):e3002232. doi: 10.1371/journal.pbio.3002232 (PMC11045101; doi:10.1371/journal.pbio.3002232)
Supplement: S5 Data — (XLSX) [file pbio.3002232.s020.xlsx]

## Sheet: A
Number of isolates
	Chevallier	Tipple
PFLU_2764	21	10
PFLU_1377	21	10
PFLU_1911	11	2
PFLU_5308	3	15
PFLU_2157	10	3
PFLU_3620	3	14
PFLU_2482	4	15
PFLU_5080	11	4
PFLU_2171	0	10
PFLU_4886	19	11
PFLU_0242	3	13
PFLU_3002	8	3
PFLU_3084	0	8
PFLU_5541	11	20
PFLU_1767	7	2
PFLU_4819	7	2
PFLU_0704	7	2
PFLU_3566	7	16
PFLU_1040	16	8
PFLU_0591	18	10
PFLU_4219	17	9
PFLU_1022	13	6
PFLU_2414	13	6
PFLU_4387	6	3
PFLU_3633	8	3
PFLU_1743	8	3
PFLU_1260	14	8
PFLU_6101	8	16
PFLU_1410	8	16
PFLU_1111	16	9
PFLU_1112	16	10
PFLU_5743	11	5
PFLU_3283	11	18
PFLU_2720	17	11
PFLU_1629	1	9
PFLU_3295	0	7
PFLU_0662	22	17
PFLU_1533	2	9
PFLU_2460	13	8
PFLU_6072	8	16
PFLU_0877	8	16
PFLU_0315	8	16
PFLU_2583	10	5
PFLU_1028	16	10
PFLU_6047	16	10
PFLU_2383	5	13
PFLU_3274	21	17
PFLU_1433	21	16
PFLU_3500	21	17
PFLU_4512	21	16
PFLU_5905	4	2

## Sheet: B
Ratio of CFU relative to SBW25 WT_lacZ
WT:WT_C	WT:WT_T	∆6072:WT_C	∆6072:WT_T	∆3500:WT_C	∆3500:WT_T	∆3295:WT_C	∆3295:WT_T	∆1533:WT_C	∆1533:WT_T	∆2414:WT_C	∆2414:WT_T	∆0315:WT_C	∆0315:WT_T	∆5080:WT_C	∆5080:WT_T	∆2583:WT_C	∆2583:WT_T
1	1.12903	0.238095	0.333333	1.66667	0.878788	0.823529	0.545455	0.75	1.66667	0.809524	0.612245	0.925926	0.692308	0.933333	0.2	2	0.75
0.576923	1	1	0.21875	0.444444	0.8	1.28571	0.4375	1.15254	0.875	1.13889	1.28571	0.592593	0.766667	1.09091	0.8125	0.666667	0.833333
1.40385	0.6	1.4	0.25	0.777778	1.6	1	1.33333	1.23077	1.18182	0.847826	1.06122	1.31147	1	1.08333	0.5	1.1875	0.928571
0.545455	1.11111	1.66667	0.076923	1.16667	1.38095	0.166667	0.5	0.677778	0.888889	1.38	0.775	0.936842	0.777778	1.4	0.666667	0.8125	0.6
0.8	0.844444	0.666667	0.555556	0.75	1.55556	1.66667	0.52	1.05405	1.45833	0.965517	1.03571	0.866667	1.15385	0.875	0.25	1.33333	0.6
1.0625	1.17143	0.545455	0.269231	0.166667	0.875	0.75	1.14286	0.693333	0.7625	0.888889	0.888889	0.85	0.55	0.692308		0.866667	0.833333
0.585366	1.04615	0.625	0.411765	0.722222	1.6	1.33333	0.736842	0.802632	1.85185	0.867925	0.666667	1.22727	1.02041	0.307692		1.3	0.833333
0.8125	0.847458	0.615385	0.304348	0.3	0.8125	0.714286	1.30769	0.631579	0.616667	0.626374	0.740741	1.1	0.960784	0.933333		0.933333	0.5
0.941176	1	0.571429	0.181818	0.806452	1.5	0.777778	1.5625	0.791667	0.66129	0.793103	0.527778	0.912088	0.631579			0.5
0.655172		0.958333		1.75	1.09524		0.818182	0.45679	0.596491	1.45454	0.819672	1.1087	0.789474
