# Supplementary material for: The genotype of barley cultivars influences multiple aspects of their associated microbiota via differential root exudate secretion
Source: PLoS Biol. 2024 Apr 25;22(4):e3002232. doi: 10.1371/journal.pbio.3002232 (PMC11045101; doi:10.1371/journal.pbio.3002232)
Supplement: S6 Data — (XLSX) [file pbio.3002232.s021.xlsx]

## Sheet: A
Geneid	control.che.1dpi.logFC	control.che.1dpi.FDR
PFLU_2686	10.3363	5.9387e-13
PFLU_1128	-7.26164	3.49629e-09
PFLU_0660	7.22921	1.24428e-09
PFLU_1129	-7.4389	2.8603e-10
PFLU_2738	7.4479	9.4724e-11
PFLU_1127	-6.91107	5.46591e-11
PFLU_3106	-6.48373	1.54843e-11
PFLU_3358	-6.19103	1.11773e-12
PFLU_1598	-5.63177	1.15023e-11
PFLU_1577	6.75076	1.27157e-13
PFLU_2054	6.14253	7.20754e-12
PFLU_2295	-5.55072	4.43131e-12
PFLU_0596	-5.80479	2.15954e-11
PFLU_1122	-6.77918	1.14703e-11
PFLU_4818	-5.79955	5.12447e-14
PFLU_2125	-5.41413	3.68764e-12
PFLU_2808	-5.69206	6.85362e-13
PFLU_1123	-6.59482	4.52316e-10
PFLU_1083	-4.8681	5.99478e-10
PFLU_5861	-5.94389	1.48424e-12
PFLU_1082	-5.00734	1.3174e-08
PFLU_4340	-5.23342	2.27883e-11
PFLU_4448	-4.75755	2.18405e-08
PFLU_4728	-5.54871	6.87365e-12
PFLU_0399	6.09029	1.19586e-13
PFLU_1124	-5.74672	2.14303e-09
PFLU_4447	-4.73412	2.338e-10
PFLU_5038	-6.16373	2.94842e-11
PFLU_2296	-5.34064	3.39142e-12
PFLU_3427	-5.68849	4.98871e-12
PFLU_4730	-5.35841	2.71888e-13
PFLU_4729	-5.3049	5.56926e-12
PFLU_4569	-4.92296	5.74162e-11
PFLU_2262	-5.93189	7.69516e-12
PFLU_3735	-5.06255	1.49249e-11
PFLU_4444	-4.75959	1.49249e-11
PFLU_4733	-5.23971	1.67219e-12
PFLU_5113	5.73788	9.17532e-07
PFLU_5608	-4.25886	1.65652e-11
PFLU_0661	4.15974	3.79756e-07
PFLU_3841	4.51232	4.08532e-08
PFLU_1125	-5.61569	5.56926e-12
PFLU_4414	-5.03954	4.47787e-11
PFLU_0916	-4.80299	1.49249e-11
PFLU_1130	-6.06346	1.24417e-11
PFLU_0566	4.38602	3.09998e-12
PFLU_3765A	-5.13927	1.67963e-13
PFLU_4551	-4.78318	5.56651e-12
PFLU_0595	-5.70124	1.61822e-12
PFLU_4502	4.95645	7.69591e-08
PFLU_5091	-3.46197	1.10042e-09
PFLU_3047	-4.78009	8.20035e-12
PFLU_4452	-4.82473	2.72911e-12
PFLU_1247	-4.51646	1.74565e-11
PFLU_4971	-4.46753	3.73643e-11
PFLU_1155	-4.5138	2.27178e-09
PFLU_1412	-3.29833	0.0145294
PFLU_4451	-4.8191	2.01989e-12
PFLU_0658	5.27413	2.48112e-11
PFLU_4800	3.03483	2.57484e-06
PFLU_3765	-5.11451	1.52759e-12
PFLU_1597	-5.10839	1.4944e-11
PFLU_4455	-4.68661	3.68764e-12
PFLU_3409	-4.99749	1.06179e-10
PFLU_0652	5.78172	2.34022e-05
PFLU_4407	-4.69498	2.39155e-12
PFLU_4731	-4.82412	2.71888e-13
PFLU_3379	-4.16105	2.37307e-11
PFLU_4417	-4.77049	2.22667e-12
PFLU_2711	-4.94139	6.67389e-12
PFLU_4454	-4.64935	1.12487e-11
PFLU_5094	-3.68077	4.79883e-09
PFLU_4413	-4.64991	3.60195e-11
PFLU_2308	2.08154	0.000118208
PFLU_0966	-4.17309	1.65459e-10
PFLU_0509	-4.488	1.65273e-12
PFLU_1485	-4.54951	2.22667e-12
PFLU_4453	-4.49404	5.65998e-12
PFLU_5039	-5.59396	4.58002e-11
PFLU_5040	-5.59275	9.45291e-10
PFLU_4445	-3.87817	2.61468e-10
PFLU_0117	-5.16741	8.53151e-12
PFLU_5095	-4.10198	2.5636e-12
PFLU_2358	-4.7638	2.47517e-10
PFLU_5037	-5.44118	1.80355e-12
PFLU_4442	-4.6183	1.52759e-12
PFLU_4721	-3.9367	3.84813e-08
PFLU_0751	-5.47976	2.08181e-13
PFLU_0398	5.22169	2.37642e-13
PFLU_4450	-4.64573	6.67389e-12
PFLU_4416	-4.206	1.85562e-12
PFLU_4430	-4.75586	4.4371e-12
PFLU_5362	-5.26567	1.67963e-13
PFLU_4411	-4.3175	8.6793e-12
PFLU_6043	-4.1538	2.01989e-12
PFLU_3318	5.36816	7.11603e-11
PFLU_0745	-4.95837	1.19586e-13
PFLU_4276	-5.13458	1.27157e-13
PFLU_4456	-4.25823	1.24417e-11
PFLU_0752	-5.3175	7.43093e-13
PFLU_3744	-3.80371	3.39591e-10
PFLU_0744	-4.9313	5.9387e-13
PFLU_1358	-3.19095	8.83625e-05
PFLU_3745	-4.018	1.32467e-11
PFLU_0964	-4.43533	5.56651e-12
PFLU_2297	-4.58522	1.5762e-12
PFLU_5096	-3.65302	1.39689e-12
PFLU_4410	-4.31951	8.90997e-13
PFLU_3741	-3.94883	2.37716e-09
PFLU_5499	4.81248	5.56926e-12
PFLU_1687	-3.9744	0.00017349
PFLU_1084	-4.46127	5.72659e-13
PFLU_2931	4.85557	1.88795e-09
PFLU_4529	1.92287	0.00142053
PFLU_0594	-4.52005	9.00762e-11
PFLU_1471	4.92158	4.53017e-12
PFLU_4441	-4.56176	2.5636e-12
PFLU_1043	-1.51753	0.00235516
PFLU_4401	-4.05454	1.01299e-12
PFLU_4948	-4.37593	2.01989e-12
PFLU_0874	-4.57625	4.92063e-11
PFLU_4463	5.10571	2.30911e-10
PFLU_4250	-4.51125	6.67389e-12
PFLU_4415	-4.01442	4.98871e-12
PFLU_0965	-4.04882	1.26308e-11
PFLU_3743	-3.63947	4.58002e-11
PFLU_0083	4.95038	7.14142e-13
PFLU_4295	4.49339	2.72911e-12
PFLU_0990	1.99996	0.000726011
PFLU_4408	-4.18306	2.39155e-12
PFLU_4969	-5.01558	5.72659e-13
PFLU_3746	-3.70344	8.89156e-11
PFLU_1830	4.83729	1.48424e-12
PFLU_4257	-4.31004	1.11773e-12
PFLU_3290	4.76137	8.19102e-09
PFLU_5269	4.69433	8.90997e-13
PFLU_3042	-3.94869	8.40374e-12
PFLU_1814	-4.29358	7.75763e-10
PFLU_5092	-3.42467	3.2144e-10
PFLU_4936	-4.67558	9.70519e-13
PFLU_5112	4.43873	1.21063e-08
PFLU_3279	4.58213	3.07617e-10
PFLU_1085	-4.25655	5.92907e-12
PFLU_4409	-4.05325	5.95541e-13
PFLU_0749	-4.54462	2.19449e-13
PFLU_0746	-4.75126	1.36584e-13
PFLU_3752	3.05697	1.93202e-06
PFLU_0910	-4.21379	2.63929e-11
PFLU_2918	-3.94831	2.04129e-11
PFLU_1716	4.5938	2.79046e-05
PFLU_0597	-3.96624	1.37554e-10
PFLU_3944	-4.57127	5.09895e-12
PFLU_0363	-3.942	3.12455e-11
PFLU_1616	-4.29693	1.71505e-10
PFLU_4406	-3.72062	3.1689e-11
PFLU_3942	-4.68322	8.90997e-13
PFLU_3943	-4.59654	8.40549e-12
PFLU_0748	-4.56309	1.36584e-13
PFLU_4435	-3.90715	4.53017e-12
PFLU_5174	-4.38799	4.93692e-11
PFLU_0508	-3.98258	3.09998e-12
PFLU_5891	-4.40893	1.19586e-13
PFLU_0064	-3.44719	6.87365e-12
PFLU_4377	-4.4655	5.29222e-09
PFLU_4734	-4.24539	1.01044e-11
PFLU_4419	-3.86269	5.92907e-12
PFLU_3424	4.21784	1.70393e-06
PFLU_3269	4.34973	4.92742e-10
PFLU_4437	-3.70047	9.88524e-12
PFLU_4427	-3.67725	1.05857e-11
PFLU_4438	-3.73946	1.24417e-11
PFLU_0186	3.39095	6.41123e-08
PFLU_0637	-2.57975	1.14525e-11
PFLU_3444	-4.17564	1.88791e-12
PFLU_5090	-2.97378	3.1328e-09
PFLU_0747	-4.31522	1.85052e-13
PFLU_5270	4.26934	2.01989e-12
PFLU_4436	-3.70261	6.87365e-12
PFLU_3270	4.32177	9.82925e-09
PFLU_2545	-4.51268	5.75338e-13
PFLU_3354	-4.53174	8.3558e-12
PFLU_3105	-4.28137	2.65692e-13
PFLU_5957	-4.05425	2.76735e-11
PFLU_0988	1.63415	0.00491811
PFLU_4382	4.50106	1.26308e-11
PFLU_1150	4.01685	1.7635e-11
PFLU_5093	-3.42114	6.85403e-11
PFLU_0063	-3.42958	2.45831e-12
PFLU_3516	2.2413	6.04669e-08
PFLU_3668	4.45977	1.53177e-05
PFLU_4446	-3.87488	1.32814e-11
PFLU_4418	-3.68897	3.44277e-12
PFLU_4568	-3.17359	0.000565827
PFLU_4766	-4.42575	3.96813e-10
PFLU_5176	-3.4618	8.98063e-08
PFLU_3289	4.12534	7.63098e-09
PFLU_4426	-3.57207	1.09081e-11
PFLU_1813	-4.37649	6.9579e-09
PFLU_0059	-3.25713	7.70439e-11
PFLU_5036	-4.36198	8.91111e-11
PFLU_4732	-3.95977	1.67963e-13
PFLU_0750	-4.34957	2.19449e-13
PFLU_6022	4.34198	1.46138e-07
PFLU_4609	4.17831	3.67115e-08
PFLU_4988	4.16476	7.69516e-12
PFLU_0534	4.17426	1.85562e-12
PFLU_0533	4.15202	4.43131e-12
PFLU_0061	-3.1455	5.90012e-11
PFLU_5454	1.31282	0.0182963
PFLU_0065	-3.21634	5.8624e-11
PFLU_3904	-2.56431	7.49762e-10
PFLU_1348	-3.34922	9.18424e-11
PFLU_0702	4.26977	1.91533e-08
PFLU_4272	1.78365	0.0579653
PFLU_4420	-3.62264	8.48137e-12
PFLU_0984	1.42542	0.0218926
PFLU_0380	-2.93409	1.61702e-08
PFLU_0703	4.22323	1.06262e-09
PFLU_2318	-4.21907	8.66094e-10
PFLU_4439	-3.47164	1.77346e-11
PFLU_3742	-3.03718	4.69316e-09
PFLU_5625	-3.80164	1.45453e-11
PFLU_3425	4.06955	1.57597e-07
PFLU_3091	-0.0965678	0.806932
PFLU_2916	1.81352	6.14636e-06
PFLU_0698	4.17551	1.01439e-06
PFLU_2544	-4.16606	4.20028e-10
PFLU_2319	-4.15864	3.6292e-10
PFLU_2321	-4.14316	1.26257e-10
PFLU_5322	-2.68059	3.68835e-09
PFLU_1152	3.43734	3.96286e-11
PFLU_5483	-1.47084	0.15697
PFLU_4384	4.1113	1.7635e-11
PFLU_0066	-2.91848	4.12474e-11
PFLU_1321	-2.21945	1.87481e-08
PFLU_5556	-3.77306	1.27206e-11
PFLU_0963	-3.6765	3.23138e-11
PFLU_0645	-2.21146	1.36321e-08
PFLU_3940	-3.68177	1.54286e-11
PFLU_2039	-2.69468	1.50864e-09
PFLU_2317	-4.04873	1.39575e-10
PFLU_0817	-2.64011	1.51847e-10
PFLU_5730	-3.97166	4.98871e-12
PFLU_0362	-3.33527	4.93692e-11
PFLU_0979	1.19819	0.0132924
PFLU_2035	-2.60917	7.40568e-09
PFLU_5860	-3.68272	5.4458e-11
PFLU_3278	3.79681	3.26534e-09
PFLU_1132	-3.87597	1.74565e-11
PFLU_0060	-2.87365	8.63685e-11
PFLU_4440	-3.52405	4.1424e-10
PFLU_4191	-3.46462	1.59139e-11
PFLU_4277	3.66624	2.22667e-12
PFLU_5859	1.64329	2.49322e-06
PFLU_1905	3.48242	0.000122007
PFLU_4424	-3.24014	1.6181e-09
PFLU_2316	-3.97396	4.78451e-11
PFLU_5513	3.63548	1.86386e-11
PFLU_3766	-3.58534	2.46816e-11
PFLU_2696	-2.39578	1.8276e-09
PFLU_5225	-2.50189	1.56033e-10
PFLU_0058	-3.03563	5.89414e-11
PFLU_5582	-2.87089	5.801e-10
PFLU_4423	-3.1607	4.68965e-10
PFLU_5761	2.85579	2.30911e-10
PFLU_5216	3.69346	5.8624e-11
PFLU_2154	3.07932	6.79916e-10
PFLU_0642	-2.04256	1.98875e-09
PFLU_3156	1.45143	0.00262799
PFLU_1757	-3.23135	2.72911e-12
PFLU_2919	-3.60864	1.07234e-12
PFLU_4422	-3.57538	4.52697e-11
PFLU_1131	-3.60562	2.41567e-11
PFLU_0648	-1.83922	1.37398e-08
PFLU_2003	-3.88016	4.59808e-10
PFLU_3001	3.76746	1.94629e-09
PFLU_1100	-2.42589	1.6181e-09
PFLU_3163	2.31353	5.67402e-07
PFLU_2264	-3.85182	3.09463e-11
PFLU_3941	-3.52185	3.68764e-12
PFLU_5479	3.84862	2.95686e-10
PFLU_6042	-3.18114	2.5636e-12
PFLU_0636	-2.21153	1.78809e-08
PFLU_6076	3.84211	1.05056e-08
PFLU_4554	0.510093	0.666702
PFLU_3090	0.0631972	0.890482
PFLU_1906	3.40351	1.11278e-06
PFLU_4987	3.76132	5.34289e-11
PFLU_5226	-2.55401	1.00658e-09
PFLU_1363	3.29024	7.68608e-10
PFLU_1907	3.0661	3.81201e-06
PFLU_1908	3.11594	8.3756e-10
PFLU_0986	1.0181	0.107162
PFLU_5487	2.62137	1.17056e-07
PFLU_0893	3.45197	1.82113e-10
PFLU_5639	3.79492	8.71275e-06
PFLU_2920	-3.62001	5.48845e-11
PFLU_4388	-3.78598	4.22595e-09
PFLU_2802	-3.78531	5.74162e-11
PFLU_2038	-2.63678	2.77196e-08
PFLU_0535	3.53234	5.56926e-12
PFLU_4972	-3.69045	1.48424e-12
PFLU_0085	3.76423	3.28803e-12
PFLU_5170	3.51489	4.72133e-11
PFLU_4708	3.76201	2.38011e-08
PFLU_2320	-3.75449	4.15949e-09
PFLU_2792	1.38509	0.000912038
PFLU_3630	-3.74911	1.94462e-12
PFLU_2586	3.3066	3.25705e-08
PFLU_2730	-3.74817	1.07153e-07
PFLU_0644	-2.035	5.12509e-08
PFLU_1490	1.64829	1.50235e-06
PFLU_5386	3.17598	1.54286e-11
PFLU_5334	-2.90292	1.14703e-11
PFLU_1042	-2.5623	4.56329e-06
PFLU_0091	2.72016	6.04733e-08
PFLU_0980	1.06516	0.0446765
PFLU_4428	-3.0915	4.52923e-11
PFLU_0875	-3.58907	2.46931e-10
PFLU_1547	2.77866	3.48658e-10
PFLU_2558	-2.65045	3.11382e-09
PFLU_1486	-3.32025	4.76385e-09
PFLU_0755	-3.5771	2.01989e-12
PFLU_0787	-2.6389	0.00140983
PFLU_0657	2.98696	1.59692e-09
PFLU_5535	3.5476	1.02438e-12
PFLU_5536	3.39485	5.15254e-12
PFLU_1439	2.88693	7.99335e-08
PFLU_1151	-3.59468	3.88844e-10
PFLU_0973	-2.588	6.94907e-05
PFLU_5980	3.1608	1.94943e-10
PFLU_5359	-3.50955	1.71505e-10
PFLU_0118	-3.28866	8.48375e-10
PFLU_2963	3.61025	7.83476e-07
PFLU_0403	3.39367	2.38333e-10
PFLU_2729	-3.62758	6.60422e-11
PFLU_4293	-3.62104	1.21184e-10
PFLU_4378	-3.50866	9.98846e-09
PFLU_0876	-3.50915	2.55676e-09
PFLU_0639	-2.54173	5.7087e-10
PFLU_1026	-3.31497	1.79033e-06
PFLU_0646	-1.92227	4.19581e-08
PFLU_3482	-2.16283	2.26988e-09
PFLU_5729	-3.59248	3.23138e-11
PFLU_6136	3.12797	1.25821e-10
PFLU_2075	-1.86073	6.7255e-08
PFLU_4374	-1.72652	1.80538e-05
PFLU_5583	-2.72515	5.18636e-10
PFLU_2078	-1.66427	6.85016e-07
PFLU_3287	3.13182	1.982e-08
PFLU_5512	3.2698	6.53204e-11
PFLU_4429	-2.95027	6.82414e-12
PFLU_4243	-3.07333	1.23494e-07
PFLU_2153	2.9614	2.56653e-08
PFLU_3989	-3.27388	3.94158e-11
PFLU_1205	-2.51815	3.77212e-10
PFLU_3902	-1.99478	1.29509e-08
PFLU_3736	3.00782	4.32393e-08
PFLU_0982	0.963339	0.102298
PFLU_3410	-3.32	2.76785e-11
PFLU_0297	3.13836	0.000420324
PFLU_2080	-1.61622	3.11637e-08
PFLU_3903	-1.80932	3.79862e-06
PFLU_2694	-3.27344	6.88268e-09
PFLU_1396	-2.14222	1.59175e-09
PFLU_2803	-3.48336	6.21942e-11
PFLU_3734	-3.40328	2.39155e-12
PFLU_5169	2.97956	1.28511e-10
PFLU_3570	2.93067	1.95794e-05
PFLU_0141	-2.14924	4.21545e-09
PFLU_3562	2.96358	2.59104e-09
PFLU_2921	-3.3311	1.86956e-10
PFLU_5509	3.18908	2.14191e-09
PFLU_2394	-3.16936	2.60692e-09
PFLU_3288	3.12317	8.31415e-08
PFLU_4334	3.27953	3.20762e-06
PFLU_0369	-2.8651	7.14194e-12
PFLU_0651	-1.69166	1.05997e-07
PFLU_0839	3.09057	8.13246e-11
PFLU_2471	-3.37657	6.55756e-10
PFLU_0458	-2.92847	4.35253e-12
PFLU_1025	-3.18461	5.73655e-06
PFLU_4736	-3.11183	6.99144e-11
PFLU_1136	-2.16137	1.00588e-09
PFLU_2077	-1.64874	1.11794e-07
PFLU_4883	-3.03159	5.15254e-12
PFLU_0370	-2.75818	2.39155e-12
PFLU_2470	-2.99004	8.31375e-09
PFLU_4425	-2.45384	8.23822e-10
PFLU_5511	3.12934	7.40462e-10
PFLU_0575	3.01006	3.49431e-11
PFLU_1604	-2.20501	4.12841e-07
PFLU_0361	-3.05581	1.06983e-09
PFLU_0062	-2.33717	1.83367e-09
PFLU_1649	2.46187	6.47604e-10
PFLU_0765	3.09076	8.47047e-10
PFLU_5858	1.81832	3.6948e-05
PFLU_2081	-1.68631	2.18289e-07
PFLU_0641	-1.95532	2.35344e-06
PFLU_2058	-3.34385	4.20155e-08
PFLU_5115	2.87214	8.35679e-07
PFLU_3280	3.10852	1.33905e-08
PFLU_5567	-1.87918	9.82925e-09
PFLU_1364	2.77	3.35988e-08
PFLU_2616	-1.9714	8.45081e-11
PFLU_5584	-2.53214	3.56175e-10
PFLU_3089	0.372735	0.168152
PFLU_0367	-2.61072	5.80758e-11
PFLU_5324	-1.59669	4.59705e-09
PFLU_3220	-2.85883	2.27374e-09
PFLU_1250	-3.18033	1.74565e-11
PFLU_5979	2.77702	1.25985e-08
PFLU_1756	-2.92414	1.25041e-09
PFLU_5532	2.82284	5.35016e-11
PFLU_2040	-2.63953	6.95414e-09
PFLU_5215	3.28133	2.10122e-09
PFLU_2074	-1.86013	1.94627e-08
PFLU_3219	-3.27484	2.06776e-10
PFLU_2036	-2.28343	3.96519e-09
PFLU_2979	1.79947	1.15547e-05
PFLU_3092	-0.283375	0.270369
PFLU_0089	2.11364	0.000148062
PFLU_5141	2.96069	2.07606e-10
PFLU_2658	-2.57435	3.29034e-10
PFLU_5171	2.89602	2.90668e-11
PFLU_0351	2.67788	8.73176e-06
PFLU_3130	-1.78317	0.00017373
PFLU_0987	0.403462	0.387524
PFLU_4305	3.24428	3.25768e-05
PFLU_4810	-2.06289	5.53603e-09
PFLU_3362	3.23181	1.48424e-12
PFLU_5644	3.22827	5.72474e-10
PFLU_2757	1.24461	0.000392993
PFLU_2951	2.12826	1.39778e-07
PFLU_4615	-2.73153	4.15528e-08
PFLU_4958	2.08576	2.92635e-06
PFLU_4991	2.3435	9.89586e-07
PFLU_2535	1.95427	0.0399132
PFLU_2224	-3.19503	1.3808e-09
PFLU_0067	-2.4023	9.03266e-11
PFLU_2326	-3.1874	3.18465e-07
PFLU_0676	-2.92255	5.09947e-09
PFLU_5255	2.69225	4.89628e-09
PFLU_5525	2.90373	3.81712e-10
PFLU_5510	2.95958	8.68164e-11
PFLU_5538	3.07281	1.48424e-12
PFLU_2726	-1.78772	1.28971e-08
PFLU_5526	3.00385	3.96916e-10
PFLU_0818	-1.91689	1.09428e-08
PFLU_0915	-3.14528	1.19931e-12
PFLU_2323	-3.15314	9.82925e-09
PFLU_3906	-1.85842	1.07268e-08
PFLU_4400	-3.12514	1.11773e-12
PFLU_4989	2.69867	1.73922e-10
PFLU_4644	-2.48769	2.03256e-10
PFLU_0994	-1.91654	1.46343e-07
PFLU_4555	1.33814	0.285165
PFLU_1578	3.11509	3.51379e-12
PFLU_0952	-1.92955	3.35988e-08
PFLU_2302	-2.87469	2.39155e-12
PFLU_0542	-2.73166	5.74399e-12
PFLU_0649	-0.804423	0.0220997
PFLU_5565	-1.58538	3.28198e-08
PFLU_1270	2.76887	1.64408e-10
PFLU_1101	-1.37175	2.51992e-05
PFLU_4387	-3.10545	7.60018e-10
PFLU_1575	2.99994	3.59573e-11
PFLU_2543	-3.09781	1.73063e-09
PFLU_3905	-1.8913	1.83195e-09
PFLU_0294	-2.52763	5.17657e-08
PFLU_4610	2.79217	7.28617e-06
PFLU_5488	2.02338	1.4031e-06
PFLU_5528	2.95681	5.67207e-09
PFLU_3359	-1.94358	1.15785e-08
PFLU_2288	2.7229	3.3162e-08
PFLU_1138	-1.74345	4.1984e-09
PFLU_5480	3.07501	2.21597e-09
PFLU_5481	3.07174	9.08315e-10
PFLU_5089	-2.27675	3.22712e-07
PFLU_2561	-0.415936	0.714793
PFLU_3107	1.20621	0.0162751
PFLU_0924	-2.40478	3.0738e-07
PFLU_1423	1.84941	1.13836e-06
PFLU_5431	-2.14134	1.19155e-09
PFLU_0675	-2.97889	1.35942e-09
PFLU_4714	2.44593	3.89982e-09
PFLU_5527	2.9225	1.49898e-09
PFLU_0909	-3.04919	2.253e-08
PFLU_1914	-1.77888	8.93878e-10
PFLU_0365	-2.66439	2.31662e-11
PFLU_2531	1.00982	0.00393803
PFLU_6135	2.80029	1.94742e-10
PFLU_5802	1.54251	1.87408e-05
PFLU_3487	-1.93841	1.01743e-08
PFLU_2647	-2.08867	1.67546e-09
PFLU_2529	1.86922	1.93744e-05
PFLU_2066	-1.89865	3.01626e-09
PFLU_3435	2.04426	6.16066e-07
PFLU_2076	-1.48976	1.11278e-06
PFLU_4292	-3.02193	6.30131e-10
PFLU_4151	2.38237	1.58709e-08
PFLU_0638	-1.52601	9.62796e-07
PFLU_4614	-2.63339	9.80348e-11
PFLU_1090	1.52236	6.19581e-06
PFLU_5247	-1.73982	3.14267e-09
PFLU_4443	-2.5313	1.2e-11
PFLU_0327	2.76335	2.98344e-10
PFLU_1137	-1.80597	4.68438e-08
PFLU_2055	2.45115	1.60096e-07
PFLU_5731	-2.78023	1.03263e-07
PFLU_4819	-1.291	7.86255e-07
PFLU_5010	2.89902	3.63321e-11
PFLU_5033	2.76592	2.14191e-09
PFLU_1351	-2.38981	1.30401e-05
PFLU_4053	1.62631	0.000683504
PFLU_5566	-1.57578	4.28182e-08
PFLU_0760	2.07518	1.02643e-07
PFLU_1919	1.77785	3.48076e-07
PFLU_5774	2.27568	4.60651e-06
PFLU_2888A	-2.65923	3.00522e-07
PFLU_1566	2.20626	4.21398e-10
PFLU_0754	-2.95435	1.9582e-10
PFLU_1213	-2.60239	1.18067e-09
PFLU_4737	-2.51298	7.70439e-11
PFLU_4383	2.96355	2.54802e-10
PFLU_3336	-1.87801	1.33914e-07
PFLU_4918	2.73611	2.76264e-09
PFLU_0569	-2.16161	9.56253e-10
PFLU_0923	-2.30275	7.50183e-08
PFLU_5789	-2.1577	9.00882e-09
PFLU_0981	0.535941	0.305314
PFLU_5156	-2.94295	1.71782e-09
PFLU_0650	-0.293176	0.248419
PFLU_1648	2.04185	2.33251e-09
PFLU_1502	-2.93042	1.14703e-11
PFLU_4707	2.72605	2.0811e-06
PFLU_3619	-2.41015	0.000147197
PFLU_4081	1.03923	0.00479769
PFLU_2079	-1.72045	3.60967e-09
PFLU_2324	-2.91463	1.50096e-07
PFLU_2573	1.90225	4.29644e-06
PFLU_5728	-2.72229	1.41801e-09
PFLU_1249	-2.78038	2.38511e-10
PFLU_5268	2.90601	3.8795e-10
PFLU_3816	-2.31833	2.04129e-11
PFLU_3881	-2.27882	6.41224e-09
PFLU_2605	1.81301	0.000101535
PFLU_0840	2.67037	7.65754e-10
PFLU_3733	-2.80049	1.26942e-10
PFLU_5140	2.89157	1.15547e-05
PFLU_2222	-2.88742	1.05236e-07
PFLU_0176	2.00693	0.00191449
PFLU_0598	-2.03707	1.31581e-07
PFLU_5013	2.40814	6.27298e-10
PFLU_2037	-1.84787	3.87862e-07
PFLU_5564	-2.0339	2.79148e-10
PFLU_0697	2.87691	1.2566e-07
PFLU_2930	2.48593	1.78128e-06
PFLU_0352	-2.59272	6.55756e-10
PFLU_5075	2.87549	4.35615e-10
PFLU_3677	2.86896	2.34847e-08
PFLU_2127	1.073	0.0045227
PFLU_3854	-2.86324	7.21564e-09
PFLU_4212	1.7837	0.00868502
PFLU_0621	-1.40792	2.35344e-06
PFLU_5522	2.63835	4.19794e-10
PFLU_0366	-2.39102	1.07755e-10
PFLU_3787	-1.96661	1.17056e-07
PFLU_0167	-1.74617	2.29119e-07
PFLU_0135	-1.74924	2.12538e-07
PFLU_6041	2.83394	1.25985e-08
PFLU_2072	-1.67885	1.2581e-06
PFLU_0681	2.67569	1.59308e-06
PFLU_4709	2.66106	3.60401e-09
PFLU_5519	2.82311	1.18429e-10
PFLU_1251	-2.71097	2.90432e-10
PFLU_5626	-2.61253	1.54843e-11
PFLU_5427	2.35071	4.30626e-10
PFLU_0451	-2.26026	1.16428e-06
PFLU_0565	2.03201	5.18421e-05
PFLU_0699	2.80547	3.19844e-06
PFLU_1202	-1.67534	1.33905e-08
PFLU_5047	-2.1164	2.05413e-10
PFLU_1365	2.44001	8.25355e-08
PFLU_0315	-2.80015	6.87329e-09
PFLU_6109	-1.26529	1.45544e-06
PFLU_6023	2.79485	3.182e-06
PFLU_0948	-1.65395	8.93112e-08
PFLU_0985	0.307243	0.503252
PFLU_6006	2.79042	6.98517e-11
PFLU_6025	2.7898	1.29957e-09
PFLU_0541	-2.12915	4.20155e-08
PFLU_2106	-1.25703	0.00157254
PFLU_5220	2.7838	1.94943e-10
PFLU_2053	1.91662	6.02954e-07
PFLU_3184	2.6327	7.46504e-08
PFLU_0551	-2.48141	3.34419e-09
PFLU_0643	-1.59684	7.29349e-07
PFLU_0441	2.36338	6.70678e-09
PFLU_1252	-2.47024	4.84825e-08
PFLU_5967	-2.48755	1.85433e-09
PFLU_5138	2.76907	2.60992e-07
PFLU_5829	2.51429	5.6299e-10
PFLU_4397	-1.86322	1.14232e-07
PFLU_2367	2.57639	1.56124e-07
PFLU_5508	2.51481	1.1717e-09
PFLU_3674	2.75576	2.73339e-05
PFLU_0983	0.328887	0.506733
PFLU_0662	1.98589	1.87758e-08
PFLU_5503	2.74918	1.67917e-10
PFLU_4925	-2.64001	1.54832e-08
PFLU_5524	2.59867	4.66535e-09
PFLU_0543	-2.38508	4.47937e-10
PFLU_4811	-2.05474	1.14291e-08
PFLU_2547	-2.2809	1.9535e-06
PFLU_4117	-2.24059	1.2174e-08
PFLU_1877	2.73051	1.29585e-07
PFLU_5044	2.39478	6.64168e-10
PFLU_2327	-2.72672	2.15123e-07
PFLU_1522	1.94577	4.70069e-07
PFLU_4366	-2.15865	6.36936e-06
PFLU_0690	-1.88123	1.18632e-05
PFLU_1576	2.40473	4.76469e-10
PFLU_0756	-2.19171	3.36456e-11
PFLU_5489	1.90165	1.16953e-06
PFLU_5518	2.71382	7.65754e-10
PFLU_1349	-1.36048	6.90553e-06
PFLU_0554	-2.38658	2.71642e-09
PFLU_0171	-1.94844	9.43417e-09
PFLU_6053	-1.86059	1.98192e-07
PFLU_5529	2.45484	2.38511e-10
PFLU_0572	-1.72248	2.68946e-07
PFLU_5523	2.65671	2.35681e-08
PFLU_5773	2.37659	2.37735e-08
PFLU_5076	2.69701	5.842e-10
PFLU_2710	-2.51027	6.66894e-09
PFLU_3764	-2.48838	1.99338e-10
PFLU_1710	-1.45799	5.00576e-09
PFLU_2030	-1.6091	2.94441e-07
PFLU_4623	2.69211	1.84262e-07
PFLU_5249	2.69028	9.27743e-11
PFLU_1224	-1.88065	1.39166e-08
PFLU_5537	2.60497	2.6367e-11
PFLU_3388	-2.59858	9.45291e-10
PFLU_1027	-2.67832	7.76216e-09
PFLU_0516	-2.40202	1.44353e-10
PFLU_6021	2.67775	2.3161e-09
PFLU_5531	2.36498	5.74162e-11
PFLU_2163	-0.588432	0.0251302
PFLU_3048	-2.67623	4.86852e-06
PFLU_3271	2.40019	5.95575e-08
PFLU_5530	2.39937	1.89892e-10
PFLU_1010	-2.67343	1.56033e-10
PFLU_2309	1.02519	0.0201704
PFLU_5790	-2.15217	3.24889e-10
PFLU_0555	-2.33816	3.29131e-09
PFLU_5012	2.3574	4.41778e-10
PFLU_4741	1.94888	3.98158e-05
PFLU_4459	-2.47947	1.08084e-07
PFLU_6108	-1.70658	1.27411e-08
PFLU_3662	2.66016	5.66726e-08
PFLU_4643	-2.00774	2.90365e-08
PFLU_5539	2.37417	2.13785e-10
PFLU_4035	-1.56939	1.00841e-08
PFLU_6014	2.65907	2.32622e-07
PFLU_3583	-2.65729	8.50217e-09
PFLU_2601	2.02718	0.00525947
PFLU_6097	-1.98969	3.07166e-08
PFLU_0328	2.44023	1.84508e-08
PFLU_0688	-1.81083	1.26304e-09
PFLU_5972	1.08717	0.0586369
PFLU_1041	-2.64971	3.88402e-08
PFLU_0753	-2.39747	1.37286e-09
PFLU_3498	0.226194	0.831188
PFLU_3584	-2.64753	3.67115e-08
PFLU_3426	2.01483	2.05172e-05
PFLU_2128	0.910638	0.000271302
PFLU_0826	-2.644	2.40534e-09
PFLU_0090	1.63332	9.88901e-05
PFLU_0187	1.54183	1.13836e-06
PFLU_1353	-2.45325	7.10767e-10
PFLU_0764	1.96164	2.19735e-09
PFLU_2126	-1.57166	0.00390029
PFLU_0520	-1.58272	2.99733e-08
PFLU_0308	-1.84482	1.33905e-08
PFLU_2218	-2.62312	2.68824e-10
PFLU_4396	-1.70235	5.03906e-09
PFLU_2591	2.61995	9.45015e-08
PFLU_5788	-2.154	1.84508e-08
PFLU_5034	2.34163	6.55131e-10
PFLU_3635	1.70106	6.85016e-07
PFLU_4240	-2.05129	7.87797e-08
PFLU_2971	-2.50538	1.28597e-09
PFLU_4780	1.29117	0.000183823
PFLU_5361	-2.53734	2.06776e-10
PFLU_5521	2.55236	1.56033e-10
PFLU_1709	-1.55251	9.95106e-08
PFLU_3040	-1.68325	1.36658e-07
PFLU_3108	1.02843	0.00303725
PFLU_3014	-1.36373	9.66372e-07
PFLU_1995	1.52251	1.94946e-06
PFLU_0684	1.88212	1.53948e-06
PFLU_1000	-2.21474	5.10919e-08
PFLU_3631	-2.34803	1.76799e-06
PFLU_5078	2.44288	1.57378e-07
PFLU_5014	2.59259	2.51197e-10
PFLU_5593	-1.39551	1.01673e-07
PFLU_3221	-2.50888	4.50466e-07
PFLU_4190	-2.05665	1.82113e-10
PFLU_5504	2.58735	2.71182e-11
PFLU_4717	-1.64812	6.69e-06
PFLU_3711	-0.10021	0.861849
PFLU_1255	-2.57342	3.01626e-09
PFLU_4267	0.88679	0.0639154
PFLU_1070	2.58072	1.71747e-09
PFLU_4433	-1.95888	8.23824e-09
PFLU_0940	-1.41179	0.000288647
PFLU_5604	1.65194	0.00546284
PFLU_3982	-2.22829	9.94899e-07
PFLU_0647	-1.6122	4.19581e-08
PFLU_3582	-2.57436	1.77546e-08
PFLU_3188	0.748356	0.0318038
PFLU_5118	1.73873	1.19114e-07
PFLU_0170	-1.79121	1.73258e-08
PFLU_2151	-1.14834	5.15172e-05
PFLU_2325	-2.56256	1.30298e-06
PFLU_1432	-2.47516	1.99338e-10
PFLU_3599	1.38263	2.41404e-05
PFLU_3356	-2.27345	2.97589e-09
PFLU_5333	-2.35427	1.57114e-10
PFLU_6134	2.56068	3.18009e-10
PFLU_2368	2.09489	1.35838e-06
PFLU_5173	2.55896	4.20028e-10
PFLU_4458	-2.55858	5.01165e-08
PFLU_5502	2.47534	5.87174e-11
PFLU_5346	-1.59746	3.12233e-08
PFLU_5383	-2.19302	4.46162e-06
PFLU_3808	-1.87683	3.53977e-08
PFLU_4198	-1.5167	1.0967e-07
PFLU_5568	-1.36477	1.36961e-07
PFLU_1685	-1.47195	0.000105159
PFLU_0146	-0.731294	0.00366903
PFLU_0951	-1.43819	8.84864e-08
PFLU_1512	-1.91856	8.79409e-08
PFLU_0084	2.51129	3.56929e-11
PFLU_6020	2.53021	1.18228e-07
PFLU_5252	2.43148	2.84719e-09
PFLU_2900	0.866414	0.017998
PFLU_3833	1.85901	2.88049e-05
PFLU_3275	2.33097	3.22145e-06
PFLU_3650	-1.37832	4.15112e-06
PFLU_1702	-1.78172	8.59504e-06
PFLU_5507	2.21014	2.67987e-09
PFLU_5486	1.45269	5.73411e-06
PFLU_5505	2.40652	5.51489e-11
PFLU_5432	-1.93483	5.99516e-09
PFLU_2648	-1.85624	5.98547e-08
PFLU_4319	-2.50906	1.10892e-11
PFLU_1717	-1.89536	3.87675e-09
PFLU_3136	-2.02618	1.4494e-08
PFLU_2987	0.736294	0.0199613
PFLU_2452	2.50231	6.49294e-06
PFLU_1225	-1.45304	6.11616e-08
PFLU_5254	2.19656	2.75786e-09
PFLU_4901	2.13695	6.96795e-09
PFLU_4116	-1.62685	7.25518e-08
PFLU_1368	-2.09396	9.99754e-11
PFLU_5335	-1.86865	1.78181e-09
PFLU_4205	1.35733	1.41056e-06
PFLU_5548	2.05983	5.52265e-09
PFLU_0949	-1.44247	2.15815e-06
PFLU_0255	1.36895	0.000484406
PFLU_5795	2.11733	5.4508e-08
PFLU_0943	-1.45415	1.56124e-07
PFLU_5520	2.47811	4.97078e-11
PFLU_0405	2.40435	4.54184e-10
PFLU_3192	-0.67823	0.00558833
PFLU_5256	2.4748	1.95447e-09
PFLU_1789	-1.56763	4.24128e-09
PFLU_4933	2.24444	9.60296e-11
PFLU_2791	-1.77975	0.000250856
PFLU_4460	-2.41274	1.08917e-07
PFLU_0392	-1.61698	1.17673e-07
PFLU_0945	-1.47367	1.82695e-07
PFLU_3515	-1.80373	1.49224e-06
PFLU_3291	2.29804	6.21004e-07
PFLU_3682	1.19052	0.00167907
PFLU_5501	2.32104	6.99144e-11
PFLU_0728	1.625	2.98261e-05
PFLU_5724	2.1508	6.60422e-11
PFLU_4746	-1.5031	5.61559e-06
PFLU_0683	1.94664	1.03992e-09
PFLU_4325	-1.79354	9.88639e-05
PFLU_4499	2.1199	1.09965e-08
PFLU_4076	0.801625	0.308858
PFLU_2706	-1.7203	6.67945e-08
PFLU_5516	2.31881	2.73388e-10
PFLU_3272	2.10036	3.96657e-06
PFLU_1643	2.35644	3.21451e-10
PFLU_4320	1.47392	4.73883e-06
PFLU_5540	2.23109	2.61468e-10
PFLU_3678	2.44202	2.4354e-06
PFLU_2045	-2.10396	2.87561e-06
PFLU_5772	2.40197	1.23494e-07
PFLU_3306	-2.44014	4.20155e-08
PFLU_1140	-2.37942	3.14731e-09
PFLU_2915	1.28794	2.98063e-07
PFLU_0691	-1.67091	2.75786e-09
PFLU_1302A	2.41823	1.35942e-09
PFLU_5139	2.43455	4.49051e-06
PFLU_2617	-1.38204	1.39413e-06
PFLU_1524	-1.52661	3.11382e-09
PFLU_1133	-1.86458	5.49064e-06
PFLU_0368	-2.07466	1.32058e-09
PFLU_4622	2.12806	2.72982e-06
PFLU_4249	-2.39509	8.87907e-10
PFLU_5968	-2.40753	3.52014e-09
PFLU_4207	1.76527	1.94413e-09
PFLU_5430	-1.83965	1.4031e-06
PFLU_3568	-2.42525	1.26438e-10
PFLU_2970	-2.42392	4.302e-07
PFLU_4579	-1.55124	2.41849e-07
PFLU_5590	1.85156	3.16427e-07
PFLU_1163	2.42202	7.72848e-08
PFLU_2307	0.886681	0.00848675
PFLU_0519	-1.58105	2.03692e-07
PFLU_5544	-2.28641	4.76385e-09
PFLU_3970	0.948978	0.00766189
PFLU_3901	-1.83871	1.9078e-09
PFLU_4517	2.01551	1.05475e-05
PFLU_3049	-2.40737	2.19086e-09
PFLU_4461	2.05607	4.26302e-08
PFLU_0039	-1.88415	1.18106e-07
PFLU_0011	2.27256	3.45729e-09
PFLU_0553	-2.18613	4.41321e-09
PFLU_1139	-2.02826	6.55756e-10
PFLU_2530	0.887195	0.00214021
PFLU_1594	-1.58391	1.17929e-05
PFLU_3389	-1.3315	4.04232e-06
PFLU_5726	2.34276	4.58002e-11
PFLU_1319	-1.60902	3.15141e-07
PFLU_4701	2.11693	1.8373e-09
PFLU_2071	-1.34211	4.31897e-07
PFLU_4995	2.39206	3.02743e-08
PFLU_1903A	1.92271	7.11413e-05
PFLU_2382	1.90477	5.67207e-09
PFLU_1825	1.52725	1.83393e-05
PFLU_3390	-1.14115	3.65369e-05
PFLU_0903	1.81997	5.52164e-08
PFLU_4432	-1.86689	3.58609e-09
PFLU_3675	2.38102	1.60203e-05
PFLU_3874	2.28215	4.54198e-06
PFLU_2454	2.37909	3.94869e-06
PFLU_2953	-1.89777	7.77484e-07
PFLU_3443	-2.26283	1.77619e-07
PFLU_3204	-2.26018	5.87133e-08
PFLU_4321	1.63955	3.23398e-06
PFLU_3380	-2.05266	6.31607e-09
PFLU_5344	-1.45558	2.11072e-07
PFLU_3405	1.65748	4.94709e-08
PFLU_0731	2.36307	1.06983e-09
PFLU_1787	-1.78643	2.4966e-07
PFLU_1433	-2.36213	1.21294e-09
PFLU_6085	2.3614	6.71781e-08
PFLU_0704	-1.42867	1.60308e-05
PFLU_0614	1.4552	1.44845e-07
PFLU_2152	-1.08975	0.000205631
PFLU_0926	-1.36182	1.37157e-06
PFLU_0603	1.90468	2.45817e-07
PFLU_5506	2.1435	5.99478e-10
PFLU_1816	2.11896	6.65373e-10
PFLU_1050	2.35017	4.1827e-08
PFLU_0475	2.0332	8.54914e-10
PFLU_0017	1.84151	4.2764e-07
PFLU_5330	2.1855	1.10401e-08
PFLU_0956	-1.22383	1.10431e-06
PFLU_2246	1.40776	0.00247697
PFLU_1271	2.08138	6.55756e-10
PFLU_0319	-1.98719	1.06346e-08
PFLU_5345	-1.23058	2.09115e-06
PFLU_5725	2.33665	3.18009e-10
PFLU_2813	0.362421	0.239325
PFLU_1086	-1.8365	9.85841e-09
PFLU_3529	2.33536	9.34317e-07
PFLU_2587	-1.92316	2.1706e-07
PFLU_5253	2.20726	4.3137e-11
PFLU_0040	-1.36573	1.66823e-07
PFLU_2159	-1.62632	6.34939e-08
PFLU_5935	-1.59312	3.09286e-07
PFLU_4097	-1.89548	7.84892e-07
PFLU_0659	-1.75498	3.33141e-10
PFLU_5009	2.16143	3.87675e-09
PFLU_0942	-1.23221	1.04159e-05
PFLU_2220	-2.31955	6.85258e-10
PFLU_0709	-1.55686	3.21918e-07
PFLU_5886	1.91157	1.84666e-06
PFLU_5613	-1.49212	7.77484e-07
PFLU_2133	0.78453	0.0210771
PFLU_5823	2.27725	1.33914e-07
PFLU_4054	1.02063	0.0201589
PFLU_4664	-1.69829	2.93397e-08
PFLU_4010	-1.49455	5.09932e-08
PFLU_3334	1.71403	3.32497e-07
PFLU_3276	2.12205	5.60793e-07
PFLU_2271	-1.52826	3.91217e-09
PFLU_3616	1.17334	5.05941e-05
PFLU_0147	1.07547	0.00122792
PFLU_1788	-1.49284	1.13836e-06
PFLU_4742	1.61922	0.000107366
PFLU_3795	0.811886	0.0104011
PFLU_5514	2.11439	1.2316e-07
PFLU_0076	2.27564	2.79329e-08
PFLU_0447	-1.77827	2.83711e-06
PFLU_0364	-2.2973	1.75712e-09
PFLU_0342	1.44482	5.51375e-06
PFLU_5500	-1.35738	1.36947e-06
PFLU_0201	1.04865	0.106221
PFLU_4833	1.07848	0.0016047
PFLU_3413	0.196248	0.687969
PFLU_3719	0.980648	0.0688428
PFLU_1920	1.26153	1.1087e-05
PFLU_5866	-0.0530224	0.896164
PFLU_2073	-1.17892	6.79036e-06
PFLU_5517	2.24691	6.20804e-10
PFLU_5251	1.96645	8.87907e-10
PFLU_4862	-1.64605	3.79748e-08
PFLU_4668	1.15196	0.000645422
PFLU_1831	2.27728	4.7244e-10
PFLU_5571	-2.10655	8.5504e-10
PFLU_1570	-1.29954	7.46695e-07
PFLU_0737	1.55634	1.42857e-07
PFLU_1886	-1.20213	9.83358e-06
PFLU_0612	2.26776	4.19581e-08
PFLU_0556	-2.26679	5.52525e-10
PFLU_5596	-1.49626	5.86337e-07
PFLU_4738	-1.477	1.11112e-07
PFLU_4694	-2.26009	5.99478e-10
PFLU_1040	-2.25975	1.77262e-11
PFLU_4099	-2.14579	2.55925e-07
PFLU_0611	2.25838	3.68835e-09
PFLU_5764	2.25736	6.45953e-08
PFLU_1682	1.30044	0.00112468
PFLU_1307	-1.7492	1.04343e-07
PFLU_1492	0.8734	0.000225134
PFLU_3079	-1.80368	3.02905e-07
PFLU_6067	-1.52183	5.47898e-06
PFLU_5673	1.46929	1.29099e-06
PFLU_4026	-2.25218	1.28126e-07
PFLU_6057	1.95199	5.10859e-05
PFLU_1853	-1.88728	1.44486e-06
PFLU_6027	2.24886	8.6853e-05
PFLU_0946	-1.09353	1.99798e-05
PFLU_5218	2.24777	1.26438e-10
PFLU_5410	2.24776	1.791e-09
PFLU_0788	-1.8673	0.00118862
PFLU_2474	2.04916	2.03116e-05
PFLU_5900	2.13752	1.44783e-08
PFLU_1067	1.87901	4.76675e-06
PFLU_1491	0.718625	0.00164832
PFLU_0950	-1.41168	1.92615e-07
PFLU_3165	1.65878	6.68801e-08
PFLU_4559	-1.63653	6.52956e-09
PFLU_2788	-1.95136	5.26884e-07
PFLU_2466	0.869694	0.000488694
PFLU_4004	-1.69207	1.33466e-05
PFLU_4905	1.84299	1.66616e-08
PFLU_5134	2.22339	2.77825e-06
PFLU_5557	-1.73693	1.00588e-09
PFLU_6110	-1.27917	2.98528e-07
PFLU_3177	1.77457	1.65895e-08
PFLU_0863	2.21482	1.51236e-09
PFLU_5248	1.46947	2.48755e-05
PFLU_0877	-1.72049	9.46341e-08
PFLU_5017	2.0083	1.01193e-09
PFLU_5801	1.89724	2.22431e-07
PFLU_5144	2.20342	2.81724e-05
PFLU_0340	2.20306	1.51868e-07
PFLU_1278	2.2028	3.67178e-10
PFLU_0625	2.13561	9.52554e-07
PFLU_1046	-1.55683	0.000528974
PFLU_1866	2.08288	2.91447e-08
PFLU_1817	2.19885	1.43588e-08
PFLU_2028	1.27834	0.000110937
PFLU_2180	-1.48226	1.11278e-06
PFLU_4626	2.19325	5.97437e-06
PFLU_0895	2.07573	2.94263e-10
PFLU_5896	-1.57202	3.03225e-06
PFLU_2776	-1.80804	0.00247569
PFLU_3199	0.613105	0.107213
PFLU_4098	-1.96775	1.11112e-07
PFLU_2571	-1.83124	1.64435e-07
PFLU_3446	0.129581	0.883269
PFLU_0482	1.87847	4.93554e-09
PFLU_2272	-1.58453	7.54284e-09
PFLU_3462	-1.53918	3.23664e-07
PFLU_3286	1.82819	1.70017e-06
PFLU_3786	1.79544	6.83172e-09
PFLU_5961	1.93475	2.15333e-06
PFLU_2922	-1.74853	1.33905e-08
PFLU_5200	1.80527	0.000856902
PFLU_3123	1.98876	2.70983e-06
PFLU_0592	-1.59155	5.28483e-05
PFLU_4104	-1.87638	1.57328e-08
PFLU_0682	1.76019	5.23901e-07
PFLU_4560	-1.3848	3.47317e-06
PFLU_5765	2.17824	5.43672e-08
PFLU_5395	2.12025	9.34674e-06
PFLU_5628	-1.98628	6.04669e-08
PFLU_5470	1.88528	3.21451e-10
PFLU_6024	2.17525	2.07589e-06
PFLU_1134	-1.25227	8.22196e-06
PFLU_1003	-1.88195	1.36321e-08
PFLU_3813	1.78147	7.26892e-08
PFLU_2651	1.6543	4.40467e-05
PFLU_3041	-1.08646	1.06197e-06
PFLU_5241	2.01831	1.58406e-07
PFLU_2724	-1.57575	1.69681e-06
PFLU_4103	-1.68907	2.02645e-09
PFLU_1436	-1.34087	6.02919e-07
PFLU_1299	1.92798	6.17265e-07
PFLU_0267	1.84196	3.3162e-08
PFLU_4395	-1.70549	2.17947e-09
PFLU_3129	-1.60038	3.03428e-06
PFLU_4170	1.8423	0.000124429
PFLU_0528	-1.72833	5.07016e-07
PFLU_0742	1.17467	0.000955154
PFLU_0010	2.12442	1.67589e-09
PFLU_5965	-1.6084	2.62279e-09
PFLU_6018	2.15699	1.24455e-07
PFLU_4326	1.94783	6.31358e-06
PFLU_3981	-2.01984	1.96314e-06
PFLU_5845	-1.66605	1.40247e-08
PFLU_5292	2.01156	1.003e-06
PFLU_2642	1.94303	4.9173e-07
PFLU_5843	-1.69112	4.66535e-09
PFLU_3805	-1.33172	1.24893e-05
PFLU_0680	1.91444	8.9063e-09
PFLU_4399	1.70374	1.87694e-07
PFLU_5966	-1.96015	3.91217e-09
PFLU_2057	-2.14679	2.41327e-07
PFLU_2427	-0.206864	0.552175
PFLU_3747	-1.66752	2.46437e-08
PFLU_5841	-1.71102	1.10031e-07
PFLU_0028	-1.75789	4.08254e-09
PFLU_4625	2.14123	5.07839e-06
PFLU_4306	-1.91042	1.21805e-06
PFLU_0283	1.71135	1.40542e-07
PFLU_6086	2.13734	0.000351456
PFLU_0142	-1.32975	4.19581e-08
PFLU_1867	2.09466	4.44499e-10
PFLU_3567	-2.13019	9.02388e-10
PFLU_5822	-1.39848	1.51991e-06
PFLU_1002	-1.66293	1.62325e-07
PFLU_0563	1.62301	0.000138155
PFLU_0894	2.03498	1.64201e-09
PFLU_1305	0.935476	0.0217786
PFLU_4556	0.328852	0.640395
PFLU_0914	-1.99834	5.72474e-10
PFLU_1052	1.87207	2.13105e-09
PFLU_5595	-1.56383	8.01233e-08
PFLU_6121	2.12307	2.43263e-10
PFLU_5545	-1.84688	3.76141e-09
PFLU_5137	2.11968	8.36367e-06
PFLU_3073	-1.58818	4.07488e-06
PFLU_5713	1.71801	1.36624e-07
PFLU_3533	2.11664	1.96153e-05
PFLU_5534	2.06741	1.95357e-10
PFLU_6079	-2.09015	2.94861e-10
PFLU_2674	1.96531	2.15242e-09
PFLU_1107	1.8499	8.8542e-09
PFLU_0338	2.00838	1.13545e-07
PFLU_3195	2.10679	1.68733e-05
PFLU_0181	-1.97038	1.7886e-08
PFLU_2725	-1.47467	3.47643e-05
PFLU_4786	-1.39615	7.14714e-07
PFLU_6015	2.10502	1.37987e-06
PFLU_4294	-2.10325	2.98344e-10
PFLU_2160	-1.44862	7.46695e-07
PFLU_0939	-1.09176	0.000230712
PFLU_0465	2.09977	6.87877e-07
PFLU_0029	-1.42299	1.10431e-06
PFLU_4595	-1.28396	7.47109e-08
PFLU_0905	1.9158	1.34919e-08
PFLU_2120	1.30353	0.00044747
PFLU_4891	-0.607753	0.286649
PFLU_2548	-1.3912	0.000662627
PFLU_0487	1.68396	8.74097e-08
PFLU_1161	1.74289	1.58393e-08
PFLU_4038	-0.976295	5.34814e-05
PFLU_5146	-1.70749	0.000177447
PFLU_5349	1.34755	0.000106218
PFLU_5515	1.99273	1.90963e-08
PFLU_2912	1.08682	0.00074699
PFLU_3868	1.83544	0.000256928
PFLU_0761	1.35719	6.83254e-08
PFLU_3200	2.09056	2.97021e-06
PFLU_3122	1.88584	1.25099e-07
PFLU_3135	-1.69768	9.10683e-07
PFLU_5250	1.24669	0.00247097
PFLU_5403	1.51268	0.000234332
PFLU_4885	2.08564	8.33379e-07
PFLU_4685	1.89598	3.86906e-08
PFLU_5026	1.19361	0.000482336
PFLU_0664	1.23171	0.00124485
PFLU_5777	1.58392	7.82214e-07
PFLU_4345	1.77198	6.2939e-08
PFLU_1664	-1.56755	8.87691e-08
PFLU_1776	-1.16042	4.16711e-05
PFLU_4695	-1.83764	1.09965e-08
PFLU_1049	1.86187	6.02919e-07
PFLU_5007	1.77915	1.80045e-09
PFLU_4273	0.50957	0.311962
PFLU_0780	1.97731	2.18965e-08
PFLU_1714	1.80022	9.39546e-09
PFLU_1671	-1.6447	1.99696e-07
PFLU_6026	2.06567	1.05784e-08
PFLU_3748	-1.79627	4.48982e-09
PFLU_0225	-1.74301	8.69475e-06
PFLU_5816	2.06292	2.58887e-07
PFLU_2555	-1.86158	1.36222e-05
PFLU_5607	-1.80039	3.08764e-05
PFLU_3173	1.87178	3.37659e-05
PFLU_1035	-1.90528	1.62551e-07
PFLU_4624	2.05919	1.08984e-05
PFLU_2266	-1.23463	1.03685e-06
PFLU_1450	1.92258	1.6629e-06
PFLU_0767	1.75139	8.74097e-08
PFLU_5433	-1.81586	9.61827e-09
PFLU_1653	2.00084	9.02852e-06
PFLU_3759	1.86033	9.33105e-07
PFLU_6039	-1.6647	1.37398e-08
PFLU_0938	-1.05008	0.00226011
PFLU_5612	-1.13204	8.22196e-06
PFLU_5704	-1.37096	1.2125e-06
PFLU_4764	1.48345	0.000491017
PFLU_5872	-1.39914	6.98269e-08
PFLU_2473	1.8257	1.91469e-05
PFLU_1998	1.45141	1.89629e-07
PFLU_5011	1.79292	3.35707e-08
PFLU_3153	1.72875	2.40606e-05
PFLU_4507	1.58788	1.84508e-08
PFLU_5099	2.04309	7.52696e-05
PFLU_1206	-1.3395	0.000246239
PFLU_5952	2.04076	1.28248e-07
PFLU_1069	2.04051	1.76035e-07
PFLU_2290	-2.03844	1.54214e-10
PFLU_3798	1.94414	4.11822e-07
PFLU_0144	-0.591922	0.00117267
PFLU_1220	-0.790175	0.0050479
PFLU_4795	-1.34602	3.13545e-06
PFLU_4096	-1.88384	1.86629e-07
PFLU_0899	-1.0671	1.07461e-06
PFLU_4645	-2.02531	3.60401e-09
PFLU_1654	2.02473	3.20762e-06
PFLU_1558	1.45115	2.90222e-09
PFLU_6007	2.02449	4.44481e-09
PFLU_4362	-1.53403	2.82067e-08
PFLU_3224	-2.02161	1.25041e-09
PFLU_2364	0.983289	0.0104561
PFLU_0103	2.0187	2.20884e-06
PFLU_1493	0.696579	0.0097506
PFLU_4593	-1.3304	7.50183e-08
PFLU_1715	1.94827	0.000264737
PFLU_2843	-1.53635	8.38752e-06
PFLU_4806	2.00911	1.80648e-06
PFLU_4329	-1.48555	0.000263418
PFLU_4627	2.00845	3.53865e-05
PFLU_2223	-2.00838	1.39395e-08
PFLU_3623	1.71648	8.04853e-07
PFLU_1126	-1.146	2.37232e-05
PFLU_0143	-0.674786	0.000485908
PFLU_6082	-1.70399	3.56571e-08
PFLU_1818	1.99686	2.34339e-08
PFLU_1215	-1.56676	8.98123e-06
PFLU_3198	2.00321	4.72128e-05
PFLU_1055	1.59306	4.92147e-07
PFLU_4558	-1.46585	1.304e-08
PFLU_6019	1.99882	3.20075e-06
PFLU_2981	-1.93537	1.24957e-09
PFLU_5411	1.99743	6.00415e-09
PFLU_5994	1.33865	1.41165e-07
PFLU_1369	-1.45681	2.22798e-08
PFLU_2777	1.95433	2.66982e-07
PFLU_5003	0.729375	0.00800845
PFLU_0343	-1.09632	5.19249e-05
PFLU_3561	0.897425	0.0150798
PFLU_2677	1.97633	5.65977e-07
PFLU_2303	-1.98995	9.15448e-09
PFLU_3952	-1.22729	0.00273155
PFLU_0145	-0.687492	0.000658747
PFLU_1999	1.34848	2.18647e-07
PFLU_0031	1.87548	8.25355e-08
PFLU_0838	1.47918	1.33677e-07
PFLU_2322	-1.53644	3.36639e-07
PFLU_5267	1.88186	6.36538e-08
PFLU_1864	1.80783	3.19427e-06
PFLU_1747	-1.11968	4.86041e-08
PFLU_4009	-1.53608	6.95414e-09
PFLU_4861	-1.31807	4.4951e-08
PFLU_1114	-1.10198	5.23756e-07
PFLU_5276	1.82527	4.07776e-07
PFLU_1704	1.91888	2.12196e-09
PFLU_3695	-0.0138567	0.986421
PFLU_1413	-1.21441	0.00402257
PFLU_3320	1.48497	0.00923138
PFLU_3391	-1.10233	3.2801e-05
PFLU_2385	-1.8446	6.91017e-05
PFLU_0253	1.15462	0.0148977
PFLU_1216	1.97429	8.26094e-09
PFLU_0481	1.85976	4.89436e-09
PFLU_3363	1.96391	1.37554e-10
PFLU_3551	-1.30413	1.52597e-06
PFLU_4592	-1.29019	8.36695e-08
PFLU_2244	0.42004	0.181854
PFLU_3753	0.324226	0.173029
PFLU_4634	1.64068	9.68295e-06
PFLU_5273	1.59043	1.25985e-08
PFLU_5371	-1.32282	3.62849e-07
PFLU_2123	-1.58406	6.32111e-07
PFLU_1092	0.924742	0.281147
PFLU_1854	-1.49755	3.57529e-05
PFLU_3987	-1.5058	0.000151407
PFLU_5732	-1.39921	2.36655e-07
PFLU_6008	1.68202	1.96605e-07
PFLU_5844	-1.55835	1.7548e-08
PFLU_5995	1.59564	5.95659e-08
PFLU_4665	-1.21439	3.99173e-06
PFLU_5766	1.81117	3.51898e-07
PFLU_3086	1.38215	1.6904e-05
PFLU_4796	-1.52646	1.31766e-07
PFLU_0277	1.95737	6.70678e-09
PFLU_0825	-1.6066	6.5593e-07
PFLU_4666	-1.57401	1.10335e-06
PFLU_2108	-1.64634	1.87446e-09
PFLU_3585	-1.88811	8.67162e-08
PFLU_0538	1.35654	7.69591e-08
PFLU_3620	1.43954	0.0726173
PFLU_4561	-1.36271	1.87877e-07
PFLU_4316	-1.53334	0.000187733
PFLU_4794	-1.40956	0.00421269
PFLU_3174	0.855775	0.0157791
PFLU_0862	1.58245	1.98908e-07
PFLU_4748	1.94867	1.90322e-08
PFLU_3431	1.73216	6.85592e-05
PFLU_0867	-1.22777	3.10158e-07
PFLU_4261	1.25082	0.000396777
PFLU_1477	1.76277	5.70018e-09
PFLU_0180	-1.94466	8.54161e-09
PFLU_2618	-1.05481	0.000218318
PFLU_3315	1.9426	3.85739e-05
PFLU_5996	1.7112	9.82925e-09
PFLU_5209	-0.845557	4.42396e-05
PFLU_1146	1.36038	5.50536e-08
PFLU_2359	1.5071	1.63067e-05
PFLU_3225	-1.867	9.54049e-09
PFLU_5533	1.83197	3.11382e-09
PFLU_5857	0.462049	0.198851
PFLU_4594	-1.20369	2.35696e-07
PFLU_4475	1.31607	1.00512e-05
PFLU_1434	1.38793	0.00515553
PFLU_5149	-1.34389	0.000517828
PFLU_2607	1.56704	0.000236493
PFLU_5917	-1.83601	3.65412e-08
PFLU_5119	1.39614	4.37918e-05
PFLU_3024	1.5783	4.32591e-07
PFLU_0329	1.66556	6.93492e-05
PFLU_2562	0.244066	0.745497
PFLU_1683	1.15056	0.00153555
PFLU_6060	-1.80985	1.89831e-07
PFLU_1209	-1.18596	9.93509e-06
PFLU_5211	-1.11685	1.18232e-06
PFLU_3693	-1.92845	6.60785e-08
PFLU_1571	-1.06523	1.32612e-06
PFLU_0913	-1.64032	1.58939e-07
PFLU_3975	-1.92456	3.40627e-07
PFLU_1935	-0.0312235	0.983622
PFLU_3676	1.92376	3.33189e-06
PFLU_2745	-1.85938	9.33105e-07
PFLU_1370	-1.15551	3.69679e-07
PFLU_2301	1.919	7.43068e-08
PFLU_2332	-0.250952	0.534235
PFLU_2221	-1.91663	1.64701e-07
PFLU_1292	-1.54169	4.10372e-06
PFLU_0166	-1.41846	7.96663e-06
PFLU_4270	0.216161	0.545785
PFLU_0568	1.5672	3.09634e-06
PFLU_0020	-1.67409	1.05129e-08
PFLU_0947	-0.961413	0.000101304
PFLU_1996	1.23487	0.0001296
PFLU_0075	1.70471	2.77424e-07
PFLU_6017	1.90816	2.31115e-08
PFLU_3097	-0.648749	0.00264916
PFLU_4266	0.49667	0.398144
PFLU_4825	-1.00864	3.35573e-06
PFLU_4275	0.200817	0.590379
PFLU_1596	-1.3844	4.65751e-05
PFLU_1226	1.71036	8.32216e-08
PFLU_3684	-1.35621	4.9492e-07
PFLU_0476	1.71656	2.2252e-07
PFLU_2996	0.577464	0.0844522
PFLU_1260	-1.05229	9.05216e-06
PFLU_2162	-0.520252	0.027263
PFLU_1261	-1.34802	3.78505e-07
PFLU_1476	1.74485	7.86161e-08
PFLU_4256	-1.89931	1.01622e-07
PFLU_2572	-1.89826	1.0042e-08
PFLU_0768	1.7041	2.11163e-08
PFLU_0770	1.74529	1.12309e-07
PFLU_6016	1.89751	8.97852e-06
PFLU_5555	1.67206	9.30982e-06
PFLU_1045	-1.89657	0.000216658
PFLU_5474	1.55805	2.86038e-06
PFLU_3740	-1.39727	9.60646e-07
PFLU_4268	0.379145	0.412775
PFLU_5469	1.78021	2.94889e-07
PFLU_4860	-1.65915	4.54184e-10
PFLU_1102	-1.39377	2.1207e-06
PFLU_4588	-1.41821	6.06423e-09
PFLU_0712	-1.89144	0.00145232
PFLU_4313	1.39632	2.25617e-07
PFLU_0105	1.42481	0.000148514
PFLU_5024	0.666806	0.0367487
PFLU_0757	-0.99665	0.00141483
PFLU_3513	1.65233	1.60134e-07
PFLU_6075	1.57237	2.76111e-07
PFLU_5771	1.88834	9.37005e-06
PFLU_1254	-1.10126	1.0713e-06
PFLU_0139	-1.38212	5.06031e-08
PFLU_3194	1.88515	1.27727e-05
PFLU_1807	-1.45631	0.000288782
PFLU_5043	1.61259	2.6599e-09
PFLU_5372	-1.24561	4.23173e-07
PFLU_3087	1.20562	0.000202514
PFLU_0561	1.72165	8.14047e-05
PFLU_3925	1.8806	2.44224e-09
PFLU_3096	-0.756708	0.000367185
PFLU_1592	0.174762	0.696692
PFLU_5846	-1.32931	4.70768e-06
PFLU_3749	-1.82202	1.76035e-07
PFLU_5831	1.2672	2.57544e-05
PFLU_1105	1.12802	1.12733e-05
PFLU_5309	-1.66966	1.84508e-08
PFLU_4830	-1.32153	2.58128e-05
PFLU_2962	1.65176	0.00737878
PFLU_4578	1.70059	3.92232e-09
PFLU_5219	1.8408	3.96289e-08
PFLU_0932	1.8612	1.38517e-08
PFLU_3707	-0.927361	0.00245575
PFLU_5780	1.77334	3.53261e-09
PFLU_0034	1.6468	5.77024e-06
PFLU_5421	1.57007	6.04416e-07
PFLU_1614	1.41277	0.000126384
PFLU_4309	-1.16385	0.000545861
PFLU_3852	-1.85631	2.1346e-06
PFLU_4674	1.85596	0.000188013
PFLU_0113	1.71151	6.36336e-08
PFLU_4522	0.48123	0.0412267
PFLU_5684	1.11521	0.000102463
PFLU_3036	-1.04236	1.82156e-05
PFLU_2267	-1.39097	1.82979e-07
PFLU_1478	1.81822	6.95414e-09
PFLU_1565	1.45427	3.44231e-07
PFLU_0927	-1.06306	1.25474e-06
PFLU_1223	-0.889912	4.61664e-05
PFLU_5482	1.84708	1.03183e-06
PFLU_2635	1.68728	1.14539e-05
PFLU_3767	1.56234	0.00040635
PFLU_2027	1.84543	1.67541e-08
PFLU_1601	-0.856482	7.37064e-05
PFLU_5736	-1.50311	9.04794e-06
PFLU_0227	0.881303	0.023048
PFLU_3958	-1.50266	0.000238053
PFLU_5678	-1.5588	6.16509e-07
PFLU_4036	1.84355	1.30187e-06
PFLU_2599	0.951111	0.117011
PFLU_5062	-1.21105	3.13026e-06
PFLU_4898	-1.83736	2.07247e-10
PFLU_6120	1.83703	4.06431e-09
PFLU_3098	-0.288693	0.191844
PFLU_5735	-1.66262	1.47465e-06
PFLU_3412	-0.4014	0.0828007
PFLU_2980	-1.68355	1.31438e-07
PFLU_0488	1.25061	0.0255462
PFLU_0485	-1.49137	3.2912e-08
PFLU_3690	-1.72747	3.40359e-05
PFLU_2793	0.873721	0.000423742
PFLU_1246	-1.82803	1.77341e-07
PFLU_4772	1.09144	2.01306e-05
PFLU_0800	-0.67991	0.000644604
PFLU_0928	-0.667061	0.00268777
PFLU_2964	1.82875	0.00195449
PFLU_0976	1.58643	1.30187e-06
PFLU_1211	-1.54009	9.69391e-07
PFLU_4188	1.34956	2.0122e-06
PFLU_5842	-1.20594	3.36587e-06
PFLU_5938	1.10766	0.00063946
PFLU_4855	1.82524	1.84508e-08
PFLU_2486	-1.68621	3.65226e-08
PFLU_1291	1.82045	8.9063e-09
PFLU_3317	1.81796	4.86686e-06
PFLU_1308	-1.48554	3.01991e-08
PFLU_2150	-0.809901	0.000600465
PFLU_3491	1.45506	0.000267786
PFLU_1374	-1.48413	7.96936e-07
PFLU_3374	-0.717778	0.00421269
PFLU_2984	1.15818	5.21149e-05
PFLU_3965	-1.81065	2.74955e-07
PFLU_3721	-0.0364129	0.940929
PFLU_0339	1.80739	3.17035e-06
PFLU_0266	1.312	4.26136e-08
PFLU_2991A	1.03704	8.67697e-07
PFLU_1309	-1.33911	2.12901e-06
PFLU_3977	-1.80464	1.38269e-05
PFLU_3661	1.80453	3.75902e-05
PFLU_0112	1.80413	1.34997e-05
PFLU_5332	-1.66755	6.16322e-08
PFLU_0455	0.578811	0.00338768
PFLU_0593	-1.79966	2.8696e-08
PFLU_4324	-1.53305	0.00114891
PFLU_4926	1.80152	5.64287e-07
PFLU_2564	-1.23629	0.000112779
PFLU_5973	1.46673	8.25326e-06
PFLU_6055	1.56938	1.41643e-06
PFLU_1806	1.11669	0.00115265
PFLU_3216	-1.66313	0.000181416
PFLU_2956	0.541679	0.563574
PFLU_0311	1.46392	6.36698e-06
PFLU_3653	-1.42287	4.49112e-07
PFLU_2070	-0.855559	0.000282607
PFLU_2425	-1.79802	3.66005e-05
PFLU_3617	0.538203	0.0514427
PFLU_2433	-1.79625	1.08084e-07
PFLU_0941	-0.93403	9.17743e-05
PFLU_0815	1.18383	0.00596077
PFLU_4564	-1.31856	7.70928e-07
PFLU_1976	-1.78994	4.62275e-07
PFLU_1389	1.39429	5.14104e-05
PFLU_3488	-1.14299	5.77344e-07
PFLU_1793	-1.78721	1.05653e-07
PFLU_0307	1.78699	0.000125011
PFLU_0071	1.10674	0.00088872
PFLU_4476	-0.534317	0.0213979
PFLU_2850	-1.18536	0.00726152
PFLU_3574	-1.75887	1.12014e-05
PFLU_4064	-1.78434	0.0208667
PFLU_0400	1.5675	3.0442e-05
PFLU_0831	-1.63304	7.43384e-08
PFLU_0016	1.35244	6.98204e-06
PFLU_3226	-1.78249	1.73165e-07
PFLU_1419	-1.65462	3.26467e-06
PFLU_0934	1.65114	0.0011712
PFLU_3197	1.78134	0.000401266
PFLU_5217	1.75272	8.84864e-08
PFLU_0158	1.54213	0.0226184
PFLU_3894	-0.973194	3.48741e-05
PFLU_3501	-1.52558	0.00024694
PFLU_4211	0.683406	0.00088994
PFLU_3930	1.77668	6.01422e-09
PFLU_3951	-1.25034	8.66758e-06
PFLU_1759	-1.43825	1.79371e-08
PFLU_1001	-1.35107	1.16577e-06
PFLU_3141	-1.70397	2.23923e-08
PFLU_1666	-1.20534	5.42506e-07
PFLU_3085	1.3169	6.94907e-05
PFLU_5350	1.01496	0.000834606
PFLU_4603	1.25993	5.62894e-07
PFLU_3476	1.53204	2.94532e-06
PFLU_3658	1.76532	1.08151e-06
PFLU_3353	-1.764	3.58609e-09
PFLU_4769	-0.9084	0.00754045
PFLU_5352	-1.01951	7.54818e-06
PFLU_3277	1.27673	3.17885e-06
PFLU_4947	-0.734843	0.0221149
PFLU_1539	1.05993	0.000118114
PFLU_1758	1.67646	0.000464536
PFLU_0591	-0.962347	0.00317371
PFLU_4749	1.4724	2.28202e-08
PFLU_0873	-1.75218	5.08548e-06
PFLU_0531	-1.17724	9.20926e-07
PFLU_0776	-1.25465	1.63792e-06
PFLU_1253	-0.925393	3.8615e-06
PFLU_0295	-1.75247	4.80374e-07
PFLU_2043	-0.652875	0.067705
PFLU_0954	1.75172	1.32336e-05
PFLU_2723	-1.05238	6.33155e-06
PFLU_4500	1.33174	8.24875e-06
PFLU_4863	-1.12788	8.06443e-05
PFLU_3613	1.04712	0.000679132
PFLU_4519	1.38543	5.97437e-06
PFLU_3305	-1.74733	2.312e-06
PFLU_1519	1.74694	7.43068e-08
PFLU_5796	-1.47016	1.56063e-07
PFLU_3615	0.857524	0.00292638
PFLU_2550	-1.74141	5.21149e-05
PFLU_5027	0.904072	0.00244791
PFLU_3393	-0.757998	0.00200462
PFLU_3793	1.73954	9.22397e-05
PFLU_5257	1.65845	1.0613e-06
PFLU_0590	-0.795588	0.0118317
PFLU_3510	-1.35969	1.37449e-06
PFLU_5611	-1.43775	3.23094e-08
PFLU_0093	1.28849	9.07267e-05
PFLU_3335	-1.04182	2.85492e-05
PFLU_5847	-1.07489	0.00019393
PFLU_4135	1.07541	0.0787681
PFLU_2443	0.474803	0.111264
PFLU_4380	1.587	5.03481e-08
PFLU_3614	0.838284	0.0115097
PFLU_5229	-1.72996	5.12746e-07
PFLU_0148A	1.47121	0.0308489
PFLU_2086	-1.60861	3.77212e-10
PFLU_1878	1.16923	9.17674e-05
PFLU_1665	-1.10295	5.19935e-05
PFLU_1066	1.57525	6.91029e-05
PFLU_0191	-1.44432	4.59301e-07
PFLU_2371	1.28791	6.75983e-05
PFLU_1767	1.13485	4.96707e-06
PFLU_6122	1.72334	1.85595e-09
PFLU_3633	-1.72169	3.45851e-08
PFLU_0837	1.41179	2.8696e-08
PFLU_0467	1.71955	1.6129e-05
PFLU_3301	1.68901	1.99833e-08
PFLU_3134	1.07005	0.000197554
PFLU_3316	1.71678	1.22218e-06
PFLU_0944	-0.591196	0.00383487
PFLU_1896	1.42465	2.17354e-05
PFLU_4682	1.56736	1.74186e-07
PFLU_5162	1.71377	1.25004e-08
PFLU_2082	-0.379467	0.0755835
PFLU_2219	-1.71134	2.14169e-07
PFLU_1823	1.71111	1.39395e-08
PFLU_3160	1.15744	4.83211e-06
PFLU_2804	-1.69098	1.26421e-08
PFLU_1265	1.32828	7.64842e-06
PFLU_2304	-1.07124	7.88428e-07
PFLU_4523	0.750815	0.000539255
PFLU_1015	-1.70817	0.000284986
PFLU_2331	-0.183707	0.600215
PFLU_2546	-1.7063	1.03528e-08
PFLU_4649	-1.25084	0.0125182
PFLU_0850	1.03197	0.00106538
PFLU_0713	-1.46081	0.00142556
PFLU_0325	-0.770417	0.000481139
PFLU_4322	1.10071	0.000337342
PFLU_3414	-0.56018	0.0096883
PFLU_0562	1.24895	0.000271913
PFLU_3445	-1.69623	6.0549e-07
PFLU_3640	-0.155893	0.647043
PFLU_4745	-1.56022	3.77212e-10
PFLU_6095	1.10203	0.000147136
PFLU_5637	1.69407	1.29516e-06
PFLU_5472	1.57904	1.39234e-07
PFLU_1234	0.935181	0.0244239
PFLU_4264	0.483848	0.220657
PFLU_4787	-1.55447	2.22119e-05
PFLU_2031	-0.793511	0.000478306
PFLU_2360	-1.33276	6.55931e-07
PFLU_2178	-1.40263	0.000312494
PFLU_5323	-0.393847	0.0369702
PFLU_1448	1.48051	0.000787241
PFLU_1667	-1.41939	5.73379e-07
PFLU_1727	-0.25289	0.485915
PFLU_3964	-1.68487	1.44153e-07
PFLU_5073	1.20454	1.46206e-05
PFLU_1694	-1.68215	8.71275e-06
PFLU_1827	1.25169	0.00232226
PFLU_5377	1.13332	3.22519e-05
PFLU_2135	1.40216	9.77584e-08
PFLU_2270	-1.22959	9.5438e-08
PFLU_4163	1.63202	2.10424e-06
PFLU_4181	-1.03418	1.62599e-06
PFLU_3535	1.32314	1.90865e-06
PFLU_4890	-0.760605	0.0729
PFLU_5984	1.46116	4.90826e-05
PFLU_4884	-1.59736	1.99009e-08
PFLU_1726	1.67528	1.49939e-06
PFLU_2621	-1.06495	6.84075e-05
PFLU_1111	-0.975403	9.19148e-05
PFLU_3709	0.55998	0.0088687
PFLU_3223	-1.48423	2.03972e-07
PFLU_2676	1.62958	6.21764e-09
PFLU_4389	-1.49417	0.000362105
PFLU_5645	1.23771	0.000392466
PFLU_0521	-1.00128	7.52026e-07
PFLU_2654	1.09728	0.00251411
PFLU_3588	-1.17538	5.59115e-05
PFLU_2021	-1.02399	0.000106054
PFLU_5579	-1.12024	3.72407e-06
PFLU_2824	0.374048	0.415825
PFLU_1148	-1.66748	0.000130136
PFLU_2242	0.76496	0.000217
PFLU_0495	-0.989499	8.24941e-06
PFLU_0931	-0.934389	2.27052e-05
PFLU_4718	-1.20134	3.05836e-07
PFLU_1720	1.05716	0.000126384
PFLU_4274	0.076399	0.889683
PFLU_1018	-1.21198	2.41036e-07
PFLU_4297	-1.11113	0.000136217
PFLU_0109	1.33449	0.00843197
PFLU_4128D	-0.966016	3.01578e-05
PFLU_3545	-0.917285	0.0744225
PFLU_0733	1.65991	3.24674e-06
PFLU_3196	1.65981	8.84807e-05
PFLU_3806	-1.16514	0.000175092
PFLU_0779	1.65857	7.12155e-09
PFLU_0223	-1.65785	2.61736e-05
PFLU_1881	-0.752881	0.00055877
PFLU_3050	-0.925668	0.000744821
PFLU_5147	1.65559	0.00110553
PFLU_4128C	-0.740735	0.000461933
PFLU_2733	-1.52252	2.88486e-08
PFLU_2994	-0.658171	0.0140647
PFLU_5434	-0.923599	3.19998e-05
PFLU_3222	-1.3284	4.99392e-06
PFLU_3896	-1.28479	5.42506e-07
PFLU_2731	-1.64663	2.82058e-06
PFLU_3109	1.28231	0.000180523
PFLU_3775	-1.40359	8.98009e-07
PFLU_2421	-1.64484	0.00123782
PFLU_0022	1.40828	2.12278e-08
PFLU_1672	-1.29832	3.90857e-06
PFLU_1868	1.64382	7.68327e-08
PFLU_1332	-1.12796	3.10158e-07
PFLU_5314	-1.64335	3.29513e-08
PFLU_2698	-1.64261	0.000115279
PFLU_0898	-0.649279	0.000111076
PFLU_3387	-0.971596	0.00301142
PFLU_1505	-1.64164	6.36194e-08
PFLU_0240	-1.64111	2.90924e-05
PFLU_3926	1.63504	1.05819e-07
PFLU_5458	-1.5198	5.60904e-06
PFLU_2568	-1.31511	1.14927e-06
PFLU_1640	0.688283	0.000302854
PFLU_5415	-0.938991	5.0841e-06
PFLU_2846	-1.24379	5.21025e-06
PFLU_3946	1.63644	4.56329e-06
PFLU_2620	-0.765757	0.00302524
PFLU_2596	-0.0585313	0.905529
PFLU_6104	1.59243	2.27295e-07
PFLU_3855	-1.63335	8.70953e-05
PFLU_4122A	0.999427	0.00105814
PFLU_2333	-0.585946	0.156471
PFLU_0830	-1.17736	2.61132e-05
PFLU_1582	-1.43932	2.09345e-08
PFLU_2164	-0.313931	0.282293
PFLU_3478	-1.18495	0.000221635
PFLU_3873	1.62777	9.30252e-09
PFLU_6013	1.62731	1.87486e-07
PFLU_3236	1.31765	8.4818e-05
PFLU_5964	-1.11362	4.20521e-07
PFLU_4791	-1.12336	2.35418e-07
PFLU_2737	1.58816	1.06532e-06
PFLU_3265	-1.57183	2.0811e-06
PFLU_0203	0.136594	0.761328
PFLU_0727	-1.26081	0.000680381
PFLU_0527	-1.41763	9.38957e-06
PFLU_1311	-1.58219	2.98453e-07
PFLU_0211	1.08559	1.39535e-05
PFLU_1156	1.61984	1.84929e-08
PFLU_3632	-1.61974	9.95996e-06
PFLU_0479	1.50636	1.63687e-06
PFLU_0140	-1.47942	6.5399e-09
PFLU_0003	1.35182	8.65129e-07
PFLU_5117	1.61688	0.000461003
PFLU_2766	1.07303	1.63295e-06
PFLU_0634	1.11829	6.2516e-05
PFLU_2721	1.61505	0.00120825
PFLU_3392	-0.969999	1.80256e-05
PFLU_6119	1.61345	9.13658e-10
PFLU_5355	0.718063	0.00017373
PFLU_3235	0.593212	0.0801232
PFLU_4193	1.04468	8.24702e-07
PFLU_5710	1.39305	0.000936026
PFLU_0394	-0.838589	9.03992e-05
PFLU_4959	0.37601	0.0853496
PFLU_6072	0.235677	0.421656
PFLU_4553	0.593525	0.42866
PFLU_2155	-1.23319	7.64804e-07
PFLU_4074	0.486832	0.529231
PFLU_4391	-1.17416	5.71471e-07
PFLU_5463	1.60727	3.08764e-05
PFLU_5136	1.60707	2.73355e-06
PFLU_5025	0.783934	0.0244759
PFLU_5712	1.22826	3.81919e-07
PFLU_2449	1.10386	0.0170182
PFLU_1467	0.765343	0.0124022
PFLU_4068	-1.60531	5.21149e-05
PFLU_1608	-1.26622	0.00184091
PFLU_2386	-1.40459	3.15972e-06
PFLU_4808	-1.33446	3.94883e-08
PFLU_4897	-1.17981	1.68951e-05
PFLU_1135	-0.890567	5.98619e-05
PFLU_1214	-1.59963	6.28954e-05
PFLU_1699	1.35701	9.93974e-07
PFLU_4896	-1.36852	0.000145049
PFLU_0663	0.830369	0.00117663
PFLU_0213	-1.5943	1.31407e-07
PFLU_5015	1.51982	4.11384e-06
PFLU_5328	1.22277	0.000109364
PFLU_1494	0.535217	0.065405
PFLU_4683	1.55667	5.73737e-06
PFLU_6066	-1.25222	0.000385939
PFLU_1300	1.59046	1.56124e-07
PFLU_2047	-0.968793	0.01622
PFLU_5889	-1.24398	4.42059e-06
PFLU_2675	1.38411	8.20308e-08
PFLU_5603	1.3413	1.28371e-05
PFLU_5338	-1.59036	5.7562e-05
PFLU_6130	-1.15668	7.63662e-05
PFLU_3155	0.88478	0.000143832
PFLU_1612	0.497351	0.320103
PFLU_3673	1.58839	1.88208e-06
PFLU_3500	-1.50509	0.000366646
PFLU_0251	1.27335	2.87551e-06
PFLU_2330	-1.58746	0.000852113
PFLU_5189	-1.22934	2.53862e-06
PFLU_4222	-1.09142	0.000702674
PFLU_2156	-1.06137	3.11616e-05
PFLU_1606	-0.661182	0.00253953
PFLU_4539	1.28474	2.29119e-07
PFLU_3383	1.2244	0.000197673
PFLU_4859	-1.33299	5.52561e-07
PFLU_0265	0.725779	0.00145919
PFLU_2870	0.926327	0.00231276
PFLU_1012	0.22429	0.730614
PFLU_5306	0.327717	0.456749
PFLU_2615	1.57719	0.000847722
PFLU_4809	1.42443	2.1181e-06
PFLU_5072	1.19116	1.11107e-06
PFLU_5168	1.2598	7.50183e-08
PFLU_1520	-1.34194	1.40241e-07
PFLU_1940	0.201793	0.573501
PFLU_4712	1.55042	4.04232e-06
PFLU_5546	1.31502	3.67585e-07
PFLU_4114	1.26136	3.12727e-05
PFLU_2509A	1.57216	0.000707643
PFLU_2256	1.11219	0.00243724
PFLU_4611	1.55032	0.00126728
PFLU_4902	1.26012	8.98063e-08
PFLU_0041	1.28396	2.32622e-07
PFLU_2029	-0.80021	0.000466909
PFLU_2281	-1.56426	7.46512e-06
PFLU_4966	-1.00212	0.000868164
PFLU_0437	0.824443	0.000106218
PFLU_4449	-1.55803	7.69591e-08
PFLU_1212	-1.45581	6.63277e-07
PFLU_0558	1.24058	6.84578e-05
PFLU_2653	0.960548	0.000100615
PFLU_1468	0.841592	0.00448555
PFLU_3843	1.55749	0.000136128
PFLU_0183	1.15145	0.000445775
PFLU_3512	1.2962	0.0001836
PFLU_1824	1.55676	6.60239e-08
PFLU_3033	0.45242	0.403521
PFLU_1030	-1.04886	1.13512e-05
PFLU_1591A	-1.55546	6.25944e-06
PFLU_3217	-1.37578	5.18421e-05
PFLU_4647	1.55389	1.01673e-07
PFLU_2462	0.302113	0.446173
PFLU_5223	1.5534	4.1827e-08
PFLU_2136	1.5526	2.75438e-07
PFLU_4980	1.01337	0.00526456
PFLU_1639	1.22618	2.44973e-06
PFLU_0344	-0.985273	1.24766e-05
PFLU_4078	0.665565	0.246945
PFLU_4296	-1.36287	0.000581792
PFLU_4291	0.70341	0.0275244
PFLU_4904	1.27962	1.84968e-06
PFLU_5782	1.49654	7.21526e-06
PFLU_2969	-1.54613	5.82768e-07
PFLU_0849	0.901344	0.00817521
PFLU_4950	0.993202	1.68738e-05
PFLU_2559	-1.18222	4.80953e-05
PFLU_3750	-1.3297	9.88201e-06
PFLU_4394	-0.970637	2.61847e-06
PFLU_0640	-0.822995	0.000723412
PFLU_1325	1.30875	7.70928e-07
PFLU_3916	1.223	3.09713e-05
PFLU_6103	1.54008	0.000123499
PFLU_4228	1.23269	5.26166e-05
PFLU_4684	1.40925	1.61329e-06
PFLU_0133	1.53879	4.26422e-07
PFLU_6123	1.53801	2.93001e-08
PFLU_1835	-1.26719	5.23729e-06
PFLU_6051	1.29241	1.60146e-07
PFLU_5707	1.19093	1.2581e-06
PFLU_4515	-1.35656	0.000191533
PFLU_1917	1.05644	0.00422455
PFLU_2276	-1.53542	0.017998
PFLU_1145	1.53537	1.7471e-08
PFLU_0616	1.53529	1.24402e-05
PFLU_2886	1.43439	0.0305178
PFLU_3428	-1.3024	2.54269e-06
PFLU_3011	-1.4038	0.000813185
PFLU_4845	1.53276	1.73129e-07
PFLU_2337	-1.53221	3.03428e-06
PFLU_3780	1.23774	0.00094218
PFLU_4251	-1.27889	6.1339e-08
PFLU_0407	-1.10965	7.80363e-06
PFLU_3521	-0.521072	0.00914005
PFLU_3357	-1.44361	0.0100462
PFLU_4091	1.31584	0.00123237
PFLU_2453	1.52651	0.000149026
PFLU_1627	-1.52543	5.76749e-07
PFLU_4160	-1.28185	0.000115901
PFLU_1011	-1.4058	0.000524234
PFLU_0137	-1.0428	1.90325e-05
PFLU_4361	-1.16221	7.35521e-06
PFLU_5656	-1.15163	3.82522e-06
PFLU_2673	-1.19607	1.98408e-06
PFLU_2034	-1.11665	7.60491e-06
PFLU_3490	0.724039	0.00653703
PFLU_6088	1.52253	0.000145049
PFLU_0055	-1.18231	1.03169e-06
PFLU_4003	-1.14481	0.014327
PFLU_5262	1.27562	6.95268e-07
PFLU_3183	1.29491	0.000409462
PFLU_5311	-0.868729	0.000555941
PFLU_5888	-0.564319	0.155206
PFLU_3203	-1.14162	4.43863e-06
PFLU_5853	0.020985	0.96363
PFLU_0861	1.37343	7.39316e-08
PFLU_0382	-1.17158	1.10446e-07
PFLU_1473	0.909925	0.00275676
PFLU_3888	-1.51537	3.25142e-08
PFLU_1848	-0.907657	6.79342e-06
PFLU_4080	0.508339	0.105124
PFLU_2935	-1.031	4.95076e-06
PFLU_3148	-1.51253	1.76316e-05
PFLU_5685	0.896365	3.29183e-05
PFLU_1870	1.0394	0.000400357
PFLU_1269	1.31475	1.91679e-07
PFLU_3495	0.281636	0.716447
PFLU_3084	1.06625	0.000528158
PFLU_2525	0.0199985	0.986421
PFLU_6040	-0.91418	0.000662627
PFLU_1400	-0.788582	8.75483e-05
PFLU_0288	-0.508094	0.00159741
PFLU_5662	1.30438	0.000138145
PFLU_2913	1.32289	8.35703e-08
PFLU_4596	-0.746209	0.000681529
PFLU_4538	1.26775	1.06559e-06
PFLU_4182	-0.885961	2.2375e-06
PFLU_1367	1.22721	6.7699e-05
PFLU_3497	-0.478744	0.519175
PFLU_5711	1.16536	5.33691e-05
PFLU_4970	-1.29438	0.00068717
PFLU_6035	1.50324	0.000149727
PFLU_5402	1.34469	1.36658e-07
PFLU_3550	-1.18076	2.42655e-05
PFLU_2582	1.0216	0.00016573
PFLU_3861	1.50187	0.000312255
PFLU_0929	-0.621265	0.0026806
PFLU_5864	1.42082	6.15908e-06
PFLU_3267	1.15105	0.00616379
PFLU_0559	1.45973	2.49433e-05
PFLU_3774	1.19476	0.000146228
PFLU_4686	0.904387	4.66223e-05
PFLU_1449	1.38055	1.101e-05
PFLU_3803	-0.759259	0.00343975
PFLU_0279	0.990641	0.00526456
PFLU_3218	-1.48796	4.65236e-08
PFLU_4153	-1.49353	0.000119048
PFLU_5575	1.49322	4.76388e-08
PFLU_5160	1.46115	9.29361e-05
PFLU_0222	-1.49212	0.000151985
PFLU_1475	1.47373	2.66638e-06
PFLU_0097	-0.539983	0.0577613
PFLU_4075	-0.288273	0.715097
PFLU_0138	-0.651916	0.131331
PFLU_3477	-1.42566	1.69716e-07
PFLU_4563	-1.04459	2.68494e-06
PFLU_0819	-0.978789	4.35701e-06
PFLU_0095	-0.37552	0.178757
PFLU_1371	-0.952309	1.6144e-05
PFLU_6074	1.13142	3.89192e-06
PFLU_2119	0.286316	0.3102
PFLU_3900	-1.15571	0.000100617
PFLU_1472	1.44585	2.85051e-09
PFLU_0205	0.682216	0.0837305
PFLU_5436	-1.05924	0.000987277
PFLU_6124	1.48426	2.36655e-07
PFLU_5419	1.48409	2.03972e-07
PFLU_4047	-0.381081	0.128065
PFLU_2046	-1.14238	0.0284182
PFLU_6037	-0.611612	0.00210893
PFLU_5342	-0.0153937	0.941542
PFLU_2756	0.369924	0.178937
PFLU_4043	-0.445065	0.0664128
PFLU_0700	1.48016	0.00808219
PFLU_3502	-1.24684	6.23206e-05
PFLU_1054	1.32514	2.59739e-06
PFLU_5357	-1.47905	0.00172472
PFLU_5404	1.03357	1.36178e-06
PFLU_5591	-1.38282	2.55012e-06
PFLU_1997	0.8032	0.000551245
PFLU_1295	0.970808	0.000211244
PFLU_5161	1.39788	2.17861e-05
PFLU_4308	-0.921712	5.77025e-05
PFLU_4008	-0.917893	0.000402315
PFLU_0502	1.03811	7.0821e-07
PFLU_3538	1.47419	0.000295107
PFLU_2892	-1.47408	4.20155e-08
PFLU_5088	-1.47389	8.13492e-08
PFLU_5785	-0.668914	0.00018018
PFLU_5648	1.05002	0.000225475
PFLU_3311	0.9516	4.13742e-05
PFLU_2693	-1.1835	1.77705e-06
PFLU_2109	-1.3119	3.32559e-06
PFLU_0888	1.47015	3.13431e-05
PFLU_4312	1.11012	5.93802e-07
PFLU_5195	1.26568	4.19401e-05
PFLU_2787	-1.24204	0.000190377
PFLU_1967	0.250114	0.492169
PFLU_5461	1.46834	2.07923e-06
PFLU_2879	-1.46833	0.00351258
PFLU_3814	1.22587	0.00366689
PFLU_5619	0.917122	1.3936e-05
PFLU_2022	-1.08377	2.8377e-06
PFLU_0162	1.46537	3.33367e-06
PFLU_3398	0.686096	0.238702
PFLU_0165	0.826216	0.0082103
PFLU_2659	-0.903094	0.000178774
PFLU_0136	-1.24493	6.83524e-06
PFLU_0463	1.46255	7.19458e-06
PFLU_5854	0.53178	0.0511667
PFLU_4763	1.34724	6.57078e-07
PFLU_1195	-1.02057	2.35418e-07
PFLU_1655	1.46035	1.46237e-06
PFLU_3470	-0.896914	0.000130847
PFLU_4077	-0.158306	0.796272
PFLU_3541	-0.94956	0.00032627
PFLU_3882	1.14209	1.63067e-05
PFLU_2353	1.13784	4.76675e-06
PFLU_2289	1.23496	1.80256e-05
PFLU_2277	-1.4582	1.49245e-05
PFLU_1528	1.14634	6.17927e-06
PFLU_3966	-1.4158	6.64659e-07
PFLU_5142	-1.45549	0.00303802
PFLU_0106	1.45516	3.28145e-06
PFLU_0300	-0.629698	0.0059383
PFLU_2397	0.858585	0.00088872
PFLU_3185	0.666523	0.0101279
PFLU_0739	1.17779	4.58674e-07
PFLU_4838	-1.05635	8.47948e-06
PFLU_5337	1.04484	0.00014413
PFLU_0448	1.45066	1.32132e-05
PFLU_1451	-1.06908	6.63129e-05
PFLU_3893	-1.3927	3.35693e-07
PFLU_0783	-1.08282	1.37987e-06
PFLU_5492	1.35949	7.97826e-06
PFLU_4032	0.339082	0.355841
PFLU_0337	1.00136	3.45066e-05
PFLU_5663	1.09193	0.000675471
PFLU_0798	1.44531	2.36671e-06
PFLU_2105	-1.22966	9.25948e-06
PFLU_0953	-0.985308	0.000133328
PFLU_2822	0.969392	0.0444026
PFLU_3720	-0.189115	0.590014
PFLU_3071	0.698197	0.0125403
PFLU_3921	1.03352	4.54378e-07
PFLU_5384	1.3294	6.74353e-05
PFLU_3563	-1.03371	0.000128234
PFLU_1099	-1.44151	9.74547e-06
PFLU_5348	0.959252	0.00337882
PFLU_4667	-1.36198	2.78322e-05
PFLU_5930	-1.02914	3.45721e-06
PFLU_3939	0.527755	0.0298427
PFLU_4331	1.27638	1.29749e-05
PFLU_0617	-1.05084	0.000133487
PFLU_3934	-1.43538	0.00217496
PFLU_2844	1.10139	1.23124e-05
PFLU_1219	-0.634545	8.73355e-05
PFLU_0472	1.36833	0.000742414
PFLU_1118	-1.10265	8.33266e-07
PFLU_1921	0.381122	0.428326
PFLU_4125	-1.22617	0.000171238
PFLU_2280	-1.43294	3.77267e-06
PFLU_6073	1.43285	9.43146e-08
PFLU_0013	1.28962	4.63532e-06
PFLU_4837	-0.829763	0.00102551
PFLU_3378	-1.43157	9.65352e-08
PFLU_1424	1.16855	2.92635e-06
PFLU_1805	0.90886	0.000187776
PFLU_3698	-1.12012	0.000642119
PFLU_3403	-1.34234	5.03681e-07
PFLU_1880	-0.497935	0.0136048
PFLU_3128	-0.474161	0.138193
PFLU_4204	1.0234	3.03428e-06
PFLU_0412	1.07977	4.91903e-07
PFLU_2145	1.08425	1.11393e-05
PFLU_0018	0.925424	3.29461e-06
PFLU_5721	1.42565	1.2125e-06
PFLU_1338	-0.74824	0.00446302
PFLU_5116	1.27382	0.000506138
PFLU_1447	1.41315	1.38105e-06
PFLU_0270	-0.930332	4.04645e-07
PFLU_2018	-1.41124	0.0307855
PFLU_1329	0.798421	0.0011096
[truncated: 1,035 more rows]

## Sheet: B
Geneid	control.ti.1dpi.logFC	control.ti.1dpi.FDR
PFLU_2686	10.7841	4.67328e-13
PFLU_1128	-8.58724	1.14257e-09
PFLU_0660	8.05865	4.83632e-10
PFLU_1129	-8.11885	2.0796e-10
PFLU_2738	8.18154	4.42408e-11
PFLU_1127	-7.76517	2.78203e-11
PFLU_3106	-5.53724	7.34898e-11
PFLU_3358	-5.79944	2.01446e-12
PFLU_1598	-5.17796	3.02197e-11
PFLU_1577	6.44068	1.6591e-13
PFLU_2054	6.81443	3.2509e-12
PFLU_2295	-5.23406	8.21002e-12
PFLU_0596	-5.50548	6.84898e-11
PFLU_1122	-6.4537	2.18126e-11
PFLU_4818	-5.61193	7.9868e-14
PFLU_2125	-4.79942	1.2213e-11
PFLU_2808	-4.97443	2.02453e-12
PFLU_1123	-6.4412	1.37642e-09
PFLU_1083	-4.22092	3.02834e-09
PFLU_5861	-6.00578	1.74742e-12
PFLU_1082	-4.32606	6.39579e-08
PFLU_4340	-4.89733	4.84712e-11
PFLU_4448	-4.42392	4.98263e-08
PFLU_4728	-5.27967	1.2213e-11
PFLU_0399	6.4128	1.129e-13
PFLU_1124	-6.41089	4.71869e-09
PFLU_4447	-4.42469	5.48641e-10
PFLU_5038	-6.38945	3.28857e-11
PFLU_2296	-4.84679	9.09714e-12
PFLU_3427	-5.61336	6.92389e-12
PFLU_4730	-4.9509	6.37033e-13
PFLU_4729	-4.90994	1.24733e-11
PFLU_4569	-4.30583	2.68873e-10
PFLU_2262	-5.6507	1.36373e-11
PFLU_3735	-4.02393	1.77766e-10
PFLU_4444	-3.93917	1.1638e-10
PFLU_4733	-5.08598	2.44649e-12
PFLU_5113	6.23733	3.04756e-07
PFLU_5608	-4.31419	1.80657e-11
PFLU_0661	4.69673	1.13836e-07
PFLU_3841	5.01575	8.08133e-09
PFLU_1125	-5.46281	9.44769e-12
PFLU_4414	-4.84399	7.17525e-11
PFLU_0916	-4.29377	5.07647e-11
PFLU_1130	-5.98955	1.82798e-11
PFLU_0566	4.8248	1.74742e-12
PFLU_3765A	-5.49396	1.6591e-13
PFLU_4551	-4.37245	1.40333e-11
PFLU_0595	-5.70938	2.39377e-12
PFLU_4502	4.03423	9.87391e-07
PFLU_5091	-4.473	1.91855e-10
PFLU_3047	-4.34757	2.18126e-11
PFLU_4452	-4.67062	4.28408e-12
PFLU_1247	-4.05226	6.07396e-11
PFLU_4971	-3.81739	2.2443e-10
PFLU_1155	-4.06549	7.54998e-09
PFLU_1412	-5.87236	0.000655943
PFLU_4451	-4.79622	2.45014e-12
PFLU_0658	5.85239	1.10064e-11
PFLU_4800	3.64454	3.4828e-07
PFLU_3765	-4.86449	2.6127e-12
PFLU_1597	-5.379	1.23233e-11
PFLU_4455	-4.30513	9.00355e-12
PFLU_3409	-4.67887	2.49239e-10
PFLU_0652	3.9982	0.000487499
PFLU_4407	-4.44735	4.45645e-12
PFLU_4731	-4.35623	7.83092e-13
PFLU_3379	-4.36109	1.87983e-11
PFLU_4417	-4.5672	3.8164e-12
PFLU_2711	-4.60973	1.40333e-11
PFLU_4454	-4.28314	2.68968e-11
PFLU_5094	-4.51748	1.58503e-09
PFLU_4413	-4.53831	5.16138e-11
PFLU_2308	3.14056	1.31558e-06
PFLU_0966	-3.88491	4.22234e-10
PFLU_0509	-4.43396	2.19238e-12
PFLU_1485	-4.27584	4.45645e-12
PFLU_4453	-4.21512	1.2213e-11
PFLU_5039	-5.57996	6.07396e-11
PFLU_5040	-5.43875	1.78171e-09
PFLU_4445	-3.03348	4.46069e-09
PFLU_0117	-5.07897	1.2213e-11
PFLU_5095	-4.44903	2.01864e-12
PFLU_2358	-4.61386	4.22234e-10
PFLU_5037	-5.49118	2.18621e-12
PFLU_4442	-4.30743	3.15624e-12
PFLU_4721	-5.48208	5.61388e-09
PFLU_0751	-5.13788	3.72794e-13
PFLU_0398	5.46611	1.68428e-13
PFLU_4450	-4.62587	8.1382e-12
PFLU_4416	-4.35353	1.74742e-12
PFLU_4430	-4.56406	7.38903e-12
PFLU_5362	-5.37514	1.6591e-13
PFLU_4411	-4.30162	1.2213e-11
PFLU_6043	-4.05252	3.15624e-12
PFLU_3318	5.12514	1.63261e-10
PFLU_0745	-4.89901	1.50244e-13
PFLU_4276	-4.91103	1.6591e-13
PFLU_4456	-3.59968	7.72246e-11
PFLU_0752	-5.09134	1.29604e-12
PFLU_3744	-3.71744	5.51022e-10
PFLU_0744	-5.00146	7.83092e-13
PFLU_1358	-5.25578	6.96196e-06
PFLU_3745	-4.1203	1.23676e-11
PFLU_0964	-4.0864	1.40333e-11
PFLU_2297	-4.68883	1.86284e-12
PFLU_5096	-4.27012	5.20686e-13
PFLU_4410	-4.18303	1.41243e-12
PFLU_3741	-4.15045	1.61709e-09
PFLU_5499	5.22881	3.2509e-12
PFLU_1687	-5.22878	2.71763e-05
PFLU_1084	-4.14962	1.29604e-12
PFLU_2931	5.2181	8.53218e-10
PFLU_4529	2.04129	0.00105793
PFLU_0594	-5.17603	6.42959e-11
PFLU_1471	5.15178	3.64454e-12
PFLU_4441	-4.17653	7.03884e-12
PFLU_1043	-5.14473	3.86511e-06
PFLU_4401	-3.81738	1.86284e-12
PFLU_4948	-4.08115	4.24385e-12
PFLU_0874	-5.10698	3.94248e-11
PFLU_4463	1.89382	2.005e-05
PFLU_4250	-4.50467	1.10064e-11
PFLU_4415	-4.24539	3.64454e-12
PFLU_0965	-3.98268	2.13088e-11
PFLU_3743	-3.62401	5.68167e-11
PFLU_0083	5.05732	6.37033e-13
PFLU_4295	5.03715	1.41243e-12
PFLU_0990	2.51311	9.55121e-05
PFLU_4408	-3.7397	7.84802e-12
PFLU_4969	-4.71817	1.29604e-12
PFLU_3746	-3.84809	6.81445e-11
PFLU_1830	4.99553	1.40739e-12
PFLU_4257	-3.9421	2.6127e-12
PFLU_3290	4.9177	6.21603e-09
PFLU_5269	4.93625	6.37033e-13
PFLU_3042	-4.2449	5.46583e-12
PFLU_1814	-3.94768	2.20467e-09
PFLU_5092	-4.00583	7.4167e-11
PFLU_4936	-4.49844	1.5133e-12
PFLU_5112	4.90317	3.76921e-09
PFLU_3279	4.89776	1.61817e-10
PFLU_1085	-3.97026	1.65623e-11
PFLU_4409	-3.561	2.01446e-12
PFLU_0749	-4.45959	3.51009e-13
PFLU_0746	-4.70132	1.6591e-13
PFLU_3752	3.64849	1.7639e-07
PFLU_0910	-4.79806	1.55815e-11
PFLU_2918	-4.78541	7.10666e-12
PFLU_1716	4.7789	1.99441e-05
PFLU_0597	-4.0973	1.51613e-10
PFLU_3944	-4.19297	1.24733e-11
PFLU_0363	-3.66479	7.50951e-11
PFLU_1616	-4.70506	1.67985e-10
PFLU_4406	-4.01706	1.99838e-11
PFLU_3942	-4.15037	2.45014e-12
PFLU_3943	-4.14631	2.51472e-11
PFLU_0748	-4.37811	1.68428e-13
PFLU_4435	-3.86485	7.84802e-12
PFLU_5174	-4.67349	4.85416e-11
PFLU_0508	-3.6569	8.21002e-12
PFLU_5891	-3.83913	2.55468e-13
PFLU_0064	-3.55761	6.86756e-12
PFLU_4377	-4.28565	1.57277e-08
PFLU_4734	-4.15302	1.40333e-11
PFLU_4419	-3.43934	2.11657e-11
PFLU_3424	3.8985	6.40017e-06
PFLU_3269	4.60991	2.73239e-10
PFLU_4437	-3.62227	1.40333e-11
PFLU_4427	-3.77434	9.84254e-12
PFLU_4438	-3.58015	2.17222e-11
PFLU_0186	4.12176	3.80527e-09
PFLU_0637	-2.87826	4.45645e-12
PFLU_3444	-3.88364	4.24385e-12
PFLU_5090	-3.56925	1.05439e-09
PFLU_0747	-4.45049	1.6591e-13
PFLU_5270	4.56051	1.41243e-12
PFLU_4436	-3.76935	7.33046e-12
PFLU_3270	4.54286	5.69648e-09
PFLU_2545	-4.54094	6.37033e-13
PFLU_3354	-3.93183	4.25501e-11
PFLU_3105	-4.20688	3.72794e-13
PFLU_5957	-4.03752	3.34687e-11
PFLU_0988	2.04164	0.000951586
PFLU_4382	4.3882	1.82471e-11
PFLU_1150	4.49972	7.10666e-12
PFLU_5093	-3.91672	2.17222e-11
PFLU_0063	-3.40248	3.31201e-12
PFLU_3516	2.86517	2.89645e-09
PFLU_3668	4.10033	7.45085e-05
PFLU_4446	-3.51968	4.01106e-11
PFLU_4418	-3.48824	7.10666e-12
PFLU_4568	-4.43665	5.27875e-05
PFLU_4766	-3.77625	2.45685e-09
PFLU_5176	-3.79311	4.16823e-08
PFLU_3289	4.38706	4.09698e-09
PFLU_4426	-3.77861	8.29257e-12
PFLU_1813	-3.87909	2.77471e-08
PFLU_0059	-3.20683	1.0451e-10
PFLU_5036	-4.34711	2.91289e-10
PFLU_4732	-4.00442	1.6591e-13
PFLU_0750	-4.14976	3.72794e-13
PFLU_6022	3.32525	1.52243e-05
PFLU_4609	4.21361	3.73747e-08
PFLU_4988	4.27395	7.14655e-12
PFLU_0534	3.69589	7.10666e-12
PFLU_0533	3.71271	1.44835e-11
PFLU_0061	-3.14076	6.90931e-11
PFLU_5454	1.82445	0.0021611
PFLU_0065	-3.19979	7.17525e-11
PFLU_3904	-3.06195	1.25245e-10
PFLU_1348	-3.78663	3.15989e-11
PFLU_0702	3.36873	3.79518e-07
PFLU_4272	2.39835	0.0122293
PFLU_4420	-3.18791	3.59275e-11
PFLU_0984	1.84683	0.00481202
PFLU_0380	-2.68123	5.28666e-08
PFLU_0703	3.33904	3.38155e-08
PFLU_2318	-3.30073	1.71941e-08
PFLU_4439	-3.39366	2.55742e-11
PFLU_3742	-2.89825	1.00088e-08
PFLU_5625	-3.55992	3.19687e-11
PFLU_3425	3.92651	2.68231e-07
PFLU_3091	4.11394	2.782e-09
PFLU_2916	2.4791	1.68187e-07
PFLU_0698	3.37972	2.63592e-05
PFLU_2544	-3.93559	9.97458e-10
PFLU_2319	-3.4093	3.99028e-09
PFLU_2321	-3.30107	1.86366e-09
PFLU_5322	-2.7539	3.02834e-09
PFLU_1152	3.21823	9.45377e-11
PFLU_5483	-4.11464	0.00212146
PFLU_4384	4.11323	1.98125e-11
PFLU_0066	-2.86727	5.68167e-11
PFLU_1321	-2.22145	2.04014e-08
PFLU_5556	-3.59981	2.44971e-11
PFLU_0963	-3.84092	3.17849e-11
PFLU_0645	-2.76316	1.39118e-09
PFLU_3940	-3.28418	5.91645e-11
PFLU_2039	-2.62579	2.37635e-09
PFLU_2317	-3.29363	1.58429e-09
PFLU_0817	-2.71662	1.29006e-10
PFLU_5730	-4.02162	7.14655e-12
PFLU_0362	-2.92893	2.55227e-10
PFLU_0979	1.35845	0.00658292
PFLU_2035	-2.67074	7.82447e-09
PFLU_5860	-4.01525	2.41376e-11
PFLU_3278	3.99549	2.09392e-09
PFLU_1132	-3.9312	1.92072e-11
PFLU_0060	-2.81894	1.25245e-10
PFLU_4440	-3.00272	2.89645e-09
PFLU_4191	-3.52888	1.80657e-11
PFLU_4277	3.98733	1.302e-12
PFLU_5859	2.29157	4.87209e-08
PFLU_1905	3.46744	0.000183108
PFLU_4424	-3.60059	1.07764e-09
PFLU_2316	-3.34226	4.48862e-10
PFLU_5513	3.29921	6.21352e-11
PFLU_3766	-3.96332	1.71231e-11
PFLU_2696	-2.7508	4.22234e-10
PFLU_5225	-2.16299	1.05988e-09
PFLU_0058	-2.99112	7.73964e-11
PFLU_5582	-2.69555	1.4037e-09
PFLU_4423	-3.50914	3.02943e-10
PFLU_5761	2.74071	4.68248e-10
PFLU_5216	3.93966	3.19687e-11
PFLU_2154	3.68511	1.02064e-10
PFLU_0642	-2.6786	1.19233e-10
PFLU_3156	1.61626	0.00134745
PFLU_1757	-3.11699	4.66698e-12
PFLU_2919	-3.90706	7.83092e-13
PFLU_4422	-3.64995	5.16138e-11
PFLU_1131	-3.70222	2.51854e-11
PFLU_0648	-2.36719	8.03873e-10
PFLU_2003	-3.63496	1.23626e-09
PFLU_3001	3.87968	1.61709e-09
PFLU_1100	-2.50255	1.41881e-09
PFLU_3163	3.2109	6.21603e-09
PFLU_2264	-3.30355	2.2443e-10
PFLU_3941	-3.16673	1.2213e-11
PFLU_5479	3.66367	7.27325e-10
PFLU_6042	-3.22839	4.01983e-12
PFLU_0636	-2.29129	1.31896e-08
PFLU_6076	3.59466	2.42283e-08
PFLU_4554	-3.32977	0.0332939
PFLU_3090	3.83946	1.60603e-08
PFLU_1906	3.55282	8.24424e-07
PFLU_4987	3.60647	9.43964e-11
PFLU_5226	-2.65639	7.75512e-10
PFLU_1363	3.81549	1.51613e-10
PFLU_1907	3.33392	1.66523e-06
PFLU_1908	3.32227	4.62733e-10
PFLU_0986	1.3135	0.0444084
PFLU_5487	2.57292	1.70658e-07
PFLU_0893	3.07632	1.30218e-09
PFLU_5639	2.54114	0.000933757
PFLU_2920	-3.78867	6.63748e-11
PFLU_4388	-3.41408	3.13046e-08
PFLU_2802	-2.78748	2.30438e-09
PFLU_2038	-2.51643	6.68574e-08
PFLU_0535	3.16531	1.92942e-11
PFLU_4972	-3.44849	3.15624e-12
PFLU_0085	3.43477	9.84254e-12
PFLU_5170	3.42678	7.28062e-11
PFLU_4708	3.54805	6.59221e-08
PFLU_2320	-2.86766	1.03727e-07
PFLU_2792	2.30689	4.23103e-06
PFLU_3630	-3.34965	7.68168e-12
PFLU_2586	3.05341	1.28577e-07
PFLU_2730	-3.12794	1.05974e-06
PFLU_0644	-2.27977	1.96087e-08
PFLU_1490	1.50854	5.31942e-06
PFLU_5386	3.73958	3.64454e-12
PFLU_5334	-2.87812	1.45716e-11
PFLU_1042	-3.737	7.32033e-07
PFLU_0091	2.67656	7.84501e-08
PFLU_0980	1.28944	0.0190682
PFLU_4428	-3.12978	4.53296e-11
PFLU_0875	-3.71702	5.42203e-10
PFLU_1547	3.08833	1.1638e-10
PFLU_2558	-2.72069	2.83617e-09
PFLU_1486	-3.53221	6.73528e-09
PFLU_0755	-3.37225	4.22654e-12
PFLU_0787	-3.68519	0.000187015
PFLU_0657	3.68343	1.44627e-10
PFLU_5535	2.95584	6.55148e-12
PFLU_5536	2.9213	2.78203e-11
PFLU_1439	3.6611	5.9624e-09
PFLU_1151	-3.66057	8.74363e-10
PFLU_0973	-3.65728	1.26689e-05
PFLU_5980	2.83696	8.48864e-10
PFLU_5359	-3.64537	1.78481e-10
PFLU_0118	-3.32428	1.98015e-09
PFLU_2963	3.28041	5.90017e-06
PFLU_0403	3.38452	2.86435e-10
PFLU_2729	-3.1687	4.83632e-10
PFLU_4293	-3.34618	4.45836e-10
PFLU_4378	-3.49321	1.64193e-08
PFLU_0876	-3.61106	4.04623e-09
PFLU_0639	-2.60734	6.95171e-10
PFLU_1026	-3.60003	9.99901e-07
PFLU_0646	-2.57808	1.85263e-09
PFLU_3482	-2.1088	3.85726e-09
PFLU_5729	-3.42131	7.55277e-11
PFLU_6136	3.01411	2.4021e-10
PFLU_2075	-2.38037	5.08931e-09
PFLU_4374	-1.24488	0.000533222
PFLU_5583	-2.57085	1.21819e-09
PFLU_2078	-2.24704	2.46892e-08
PFLU_3287	3.55837	5.03752e-09
PFLU_5512	2.91794	2.83539e-10
PFLU_4429	-2.95575	8.21002e-12
PFLU_4243	-3.40502	9.77294e-08
PFLU_2153	3.53527	2.75826e-09
PFLU_3989	-3.17625	9.44065e-11
PFLU_1205	-2.74973	1.58341e-10
PFLU_3902	-2.68157	6.03615e-10
PFLU_3736	3.46252	7.41047e-09
PFLU_0982	1.13482	0.0624241
PFLU_3410	-3.43773	3.32833e-11
PFLU_0297	2.8244	0.00208592
PFLU_2080	-2.19735	1.11328e-09
PFLU_3903	-2.83162	4.69732e-08
PFLU_2694	-3.49136	3.84788e-09
PFLU_1396	-2.38547	5.48324e-10
PFLU_2803	-2.83826	7.81479e-10
PFLU_3734	-3.34828	3.90821e-12
PFLU_5169	2.73318	4.60898e-10
PFLU_3570	3.48125	3.3629e-06
PFLU_0141	-2.03667	8.98082e-09
PFLU_3562	3.47322	4.62312e-10
PFLU_2921	-3.47229	2.77085e-10
PFLU_5509	2.71903	1.93392e-08
PFLU_2394	-3.45932	2.21827e-09
PFLU_3288	3.45724	2.76805e-08
PFLU_4334	3.01821	8.23998e-06
PFLU_0369	-2.73954	1.41757e-11
PFLU_0651	-2.37743	2.15002e-09
PFLU_0839	2.88208	2.13846e-10
PFLU_2471	-3.44046	8.74363e-10
PFLU_0458	-2.65703	1.28424e-11
PFLU_1025	-3.42933	3.43936e-06
PFLU_4736	-2.50816	1.01751e-09
PFLU_1136	-2.16048	1.23255e-09
PFLU_2077	-2.22659	4.31037e-09
PFLU_4883	-3.18217	4.24385e-12
PFLU_0370	-2.66968	4.24385e-12
PFLU_2470	-3.19882	5.02232e-09
PFLU_4425	-2.87451	2.06231e-10
PFLU_5511	2.76422	3.96248e-09
PFLU_0575	3.36685	1.11183e-11
PFLU_1604	-2.12939	9.12701e-07
PFLU_0361	-2.6925	5.21611e-09
PFLU_0062	-2.22946	4.0154e-09
PFLU_1649	2.30551	1.63352e-09
PFLU_0765	2.85543	2.57599e-09
PFLU_5858	2.78138	2.12717e-07
PFLU_2081	-2.19795	1.21482e-08
PFLU_0641	-1.93759	3.74916e-06
PFLU_2058	-2.24627	4.18635e-06
PFLU_5115	3.32183	1.2815e-07
PFLU_3280	3.32127	6.6125e-09
PFLU_5567	-1.87307	1.11723e-08
PFLU_1364	3.31221	4.0154e-09
PFLU_2616	-2.22651	2.48559e-11
PFLU_5584	-2.35353	1.00338e-09
PFLU_3089	3.29692	4.22234e-10
PFLU_0367	-2.54087	9.45377e-11
PFLU_5324	-1.79018	1.62361e-09
PFLU_3220	-3.29063	1.03229e-09
PFLU_1250	-3.01614	3.65278e-11
PFLU_5979	2.46502	8.80562e-08
PFLU_1756	-3.10203	1.03468e-09
PFLU_5532	2.50805	2.5463e-10
PFLU_2040	-2.05477	1.63339e-07
PFLU_5215	3.25982	2.67398e-09
PFLU_2074	-2.09019	7.13339e-09
PFLU_3219	-3.10669	7.92938e-10
PFLU_2036	-2.06568	2.07058e-08
PFLU_2979	2.00971	3.97757e-06
PFLU_3092	2.98798	1.11384e-09
PFLU_0089	2.04793	0.000215895
PFLU_5141	3.26489	7.34898e-11
PFLU_2658	-2.47877	6.42494e-10
PFLU_5171	2.52577	1.74223e-10
PFLU_0351	2.51329	3.18683e-05
PFLU_3130	-1.924	0.000114093
PFLU_0987	0.975147	0.0403085
PFLU_4305	2.21647	0.00119597
PFLU_4810	-2.15302	3.85726e-09
PFLU_3362	3.18376	1.93718e-12
PFLU_5644	2.74974	5.97188e-09
PFLU_2757	1.52422	6.27533e-05
PFLU_2951	2.57438	1.59079e-08
PFLU_4615	-3.20913	9.24047e-09
PFLU_4958	1.8204	2.34102e-05
PFLU_4991	2.16726	3.43595e-06
PFLU_2535	1.96862	0.050556
PFLU_2224	-2.85239	1.01873e-08
PFLU_0067	-2.5991	4.35631e-11
PFLU_2326	-2.50745	4.79321e-06
PFLU_0676	-2.43893	4.91365e-08
PFLU_5255	2.59458	9.1787e-09
PFLU_5525	2.35399	6.52009e-09
PFLU_5510	2.51949	7.17881e-10
PFLU_5538	2.58845	8.17251e-12
PFLU_2726	-2.01583	4.67294e-09
PFLU_5526	2.39285	6.85026e-09
PFLU_0818	-1.95043	9.68406e-09
PFLU_0915	-3.15414	1.53683e-12
PFLU_2323	-2.22247	6.33766e-07
PFLU_3906	-1.8691	1.11727e-08
PFLU_4400	-3.11004	1.41638e-12
PFLU_4989	3.13965	3.06592e-11
PFLU_4644	-2.24092	9.17427e-10
PFLU_0994	-1.94589	1.35508e-07
PFLU_4555	-1.79721	0.326194
PFLU_1578	2.70218	1.80657e-11
PFLU_0952	-2.26453	5.2878e-09
PFLU_2302	-2.88266	3.2509e-12
PFLU_0542	-2.71545	7.68168e-12
PFLU_0649	-1.18352	0.00198392
PFLU_5565	-1.68824	1.81294e-08
PFLU_1270	2.64711	3.15192e-10
PFLU_1101	-1.00652	0.000544883
PFLU_4387	-2.99005	1.58429e-09
PFLU_1575	2.74415	1.36363e-10
PFLU_2543	-2.90719	4.3769e-09
PFLU_3905	-2.07113	8.83411e-10
PFLU_0294	-1.86164	1.92567e-06
PFLU_4610	2.80849	7.84275e-06
PFLU_5488	1.96326	2.29881e-06
PFLU_5528	2.49778	5.09575e-08
PFLU_3359	-2.0809	5.68236e-09
PFLU_2288	3.0816	7.84387e-09
PFLU_1138	-1.75282	4.54394e-09
PFLU_5480	2.68982	1.94988e-08
PFLU_5481	2.68665	7.54998e-09
PFLU_5089	-2.41328	4.20279e-07
PFLU_2561	-0.653555	0.579766
PFLU_3107	1.45702	0.00598546
PFLU_0924	-2.71713	8.68672e-08
PFLU_1423	2.27241	1.11083e-07
PFLU_5431	-2.12153	1.74678e-09
PFLU_0675	-2.33335	2.66332e-08
PFLU_4714	1.93074	7.95134e-08
PFLU_5527	2.41118	1.66423e-08
PFLU_0909	-2.6366	2.37241e-07
PFLU_1914	-2.03514	2.06231e-10
PFLU_0365	-2.36026	1.13082e-10
PFLU_2531	1.73471	3.3949e-05
PFLU_6135	2.47599	1.14257e-09
PFLU_5802	1.38606	8.59418e-05
PFLU_3487	-1.63547	8.98668e-08
PFLU_2647	-2.06821	2.19632e-09
PFLU_2529	2.46208	9.27959e-07
PFLU_2066	-1.91383	3.15828e-09
PFLU_3435	1.89926	2.1497e-06
PFLU_2076	-1.94429	7.02055e-08
PFLU_4292	-2.68248	4.23235e-09
PFLU_4151	2.32699	2.62465e-08
PFLU_0638	-1.22747	1.31106e-05
PFLU_4614	-2.98512	2.84556e-11
PFLU_1090	1.96286	3.46252e-07
PFLU_5247	-2.05888	4.83632e-10
PFLU_4443	-2.77149	5.63052e-12
PFLU_0327	2.48228	1.58429e-09
PFLU_1137	-1.82484	4.81642e-08
PFLU_2055	3.00864	1.54895e-08
PFLU_5731	-3.00605	5.09575e-08
PFLU_4819	-1.88619	1.03928e-08
PFLU_5010	2.47338	2.795e-10
PFLU_5033	2.27825	6.19894e-08
PFLU_1351	-2.85284	2.88522e-06
PFLU_4053	1.5217	0.00165509
PFLU_5566	-1.62067	3.51598e-08
PFLU_0760	1.92365	3.32025e-07
PFLU_1919	2.03036	8.06058e-08
PFLU_5774	2.4852	2.05789e-06
PFLU_2888A	-2.06342	6.07795e-06
PFLU_1566	2.07953	1.05988e-09
PFLU_0754	-2.48755	1.66074e-09
PFLU_1213	-2.52405	2.00455e-09
PFLU_4737	-2.14554	6.12431e-10
PFLU_4383	2.94878	3.25278e-10
PFLU_3336	-1.94556	1.04143e-07
PFLU_4918	2.5031	1.19649e-08
PFLU_0569	-2.44144	3.85223e-10
PFLU_0923	-2.70618	1.24346e-08
PFLU_5789	-2.17267	1.02365e-08
PFLU_0981	0.587857	0.276963
PFLU_5156	-2.70287	5.71682e-09
PFLU_0650	-0.999976	0.000775228
PFLU_1648	1.95579	4.48636e-09
PFLU_1502	-2.69672	4.25501e-11
PFLU_4707	2.15843	4.37435e-05
PFLU_3619	-2.92893	4.20535e-05
PFLU_4081	1.17219	0.00241624
PFLU_2079	-2.08509	5.32488e-10
PFLU_2324	-1.98949	1.14553e-05
PFLU_2573	1.87284	5.56076e-06
PFLU_5728	-2.79105	1.63352e-09
PFLU_1249	-2.65674	5.94847e-10
PFLU_5268	2.86414	5.76506e-10
PFLU_3816	-2.53925	1.18092e-11
PFLU_3881	-2.29667	6.79849e-09
PFLU_2605	1.91417	8.28802e-05
PFLU_0840	2.48005	2.20295e-09
PFLU_3733	-2.89179	1.81792e-10
PFLU_5140	2.03046	0.000499769
PFLU_2222	-2.61892	7.21004e-07
PFLU_0176	2.11094	0.00176578
PFLU_0598	-1.97768	2.54319e-07
PFLU_5013	2.13073	3.46844e-09
PFLU_2037	-1.69469	1.75238e-06
PFLU_5564	-2.05733	2.84145e-10
PFLU_0697	1.98218	2.16054e-05
PFLU_2930	2.87665	3.62389e-07
PFLU_0352	-2.36088	2.33703e-09
PFLU_5075	2.40296	5.53547e-09
PFLU_3677	2.12332	1.57714e-06
PFLU_2127	1.69394	8.3083e-05
PFLU_3854	-2.40849	1.00679e-07
PFLU_4212	1.57475	0.020344
PFLU_0621	-1.57547	8.1428e-07
PFLU_5522	2.12078	7.12461e-09
PFLU_0366	-2.16232	4.52779e-10
PFLU_3787	-1.55562	2.02641e-06
PFLU_0167	-1.8164	2.32828e-07
PFLU_0135	-1.72486	3.54092e-07
PFLU_6041	1.99476	1.70075e-06
PFLU_2072	-2.08517	1.61065e-07
PFLU_0681	2.30907	1.69061e-05
PFLU_4709	2.34069	2.0164e-08
PFLU_5519	2.18433	4.09698e-09
PFLU_1251	-2.79248	2.67634e-10
PFLU_5626	-2.37876	6.63748e-11
PFLU_5427	2.08146	2.42781e-09
PFLU_0451	-2.20619	1.71957e-06
PFLU_0565	1.63613	0.00080387
PFLU_0699	1.91113	0.000281604
PFLU_1202	-1.82716	7.01913e-09
PFLU_5047	-2.12722	2.6896e-10
PFLU_1365	2.80138	1.66975e-08
PFLU_0315	-2.07506	2.61488e-07
PFLU_6109	-1.42896	5.83415e-07
PFLU_6023	2.01289	0.000194601
PFLU_0948	-1.85953	2.46892e-08
PFLU_0985	0.616046	0.181753
PFLU_6006	2.23939	1.27019e-09
PFLU_6025	1.93547	2.097e-07
PFLU_0541	-1.64568	9.83118e-07
PFLU_2106	-1.37928	0.00161234
PFLU_5220	2.3881	1.47088e-09
PFLU_2053	2.61083	1.28754e-08
PFLU_3184	2.77866	4.41432e-08
PFLU_0551	-2.21099	1.46491e-08
PFLU_0643	-1.8604	2.097e-07
PFLU_0441	2.77238	1.03229e-09
PFLU_1252	-2.27517	1.91303e-07
PFLU_5967	-2.25759	6.85026e-09
PFLU_5138	1.90599	2.92085e-05
PFLU_5829	2.13975	4.91988e-09
PFLU_4397	-1.85024	1.71565e-07
PFLU_2367	2.37163	5.04011e-07
PFLU_5508	2.14308	9.24047e-09
PFLU_3674	2.12286	0.000932396
PFLU_0983	0.38436	0.450291
PFLU_0662	1.87411	5.26815e-08
PFLU_5503	2.3358	1.37642e-09
PFLU_4925	-2.53461	2.74042e-08
PFLU_5524	2.0268	1.05389e-07
PFLU_0543	-2.10702	2.54005e-09
PFLU_4811	-2.01753	1.77722e-08
PFLU_2547	-2.73973	6.8758e-07
PFLU_4117	-1.88986	1.46392e-07
PFLU_1877	2.27445	1.94183e-06
PFLU_5044	2.15727	2.8626e-09
PFLU_2327	-2.18994	3.13199e-06
PFLU_1522	1.85809	9.46269e-07
PFLU_4366	-2.4747	2.82816e-06
PFLU_0690	-2.1325	9.54823e-06
PFLU_1576	2.14728	2.41424e-09
PFLU_0756	-2.36916	1.76296e-11
PFLU_5489	1.92656	1.2826e-06
PFLU_5518	2.24796	9.43624e-09
PFLU_1349	-1.38589	6.13433e-06
PFLU_0554	-2.17941	9.37083e-09
PFLU_0171	-2.08447	4.99151e-09
PFLU_6053	-1.76736	4.32125e-07
PFLU_5529	2.12073	1.6119e-09
PFLU_0572	-1.60536	6.98097e-07
PFLU_5523	1.99141	9.08394e-07
PFLU_5773	2.02403	2.59988e-07
PFLU_5076	2.44826	2.68705e-09
PFLU_2710	-2.69638	5.68236e-09
PFLU_3764	-2.55706	2.56416e-10
PFLU_1710	-1.50038	4.0154e-09
PFLU_2030	-1.16476	1.40244e-05
PFLU_4623	2.01179	7.3164e-06
PFLU_5249	2.10679	2.19315e-09
PFLU_1224	-1.73058	4.73255e-08
PFLU_5537	2.1818	2.55227e-10
PFLU_3388	-2.14937	1.58244e-08
PFLU_1027	-2.68312	1.08271e-08
PFLU_0516	-2.37626	2.25341e-10
PFLU_6021	2.02053	1.15547e-07
PFLU_5531	1.93067	8.39646e-10
PFLU_2163	-0.657382	0.0155489
PFLU_3048	-2.24584	3.45795e-05
PFLU_3271	2.67518	1.72147e-08
PFLU_5530	1.97433	2.29834e-09
PFLU_1010	-2.4867	7.1829e-10
PFLU_2309	1.05046	0.0225911
PFLU_5790	-2.31817	1.77766e-10
PFLU_0555	-2.26662	5.70454e-09
PFLU_5012	2.09904	2.21827e-09
PFLU_4741	1.90882	5.50672e-05
PFLU_4459	-2.17217	5.77213e-07
PFLU_6108	-1.45777	1.2341e-07
PFLU_3662	1.92974	5.56999e-06
PFLU_4643	-1.40476	2.44827e-06
PFLU_5539	2.17849	7.45756e-10
PFLU_4035	-1.78679	2.71082e-09
PFLU_6014	2.11181	7.15137e-06
PFLU_3583	-1.7968	1.1131e-06
PFLU_2601	1.70938	0.0213259
PFLU_6097	-1.75851	1.52472e-07
PFLU_0328	1.98407	3.62495e-07
PFLU_0688	-1.74706	2.33703e-09
PFLU_5972	1.14901	0.0581866
PFLU_1041	-2.45435	1.85551e-07
PFLU_0753	-2.36224	2.78712e-09
PFLU_3498	0.0854859	0.940047
PFLU_3584	-1.92782	1.94823e-06
PFLU_3426	2.08978	1.59026e-05
PFLU_2128	1.68928	2.74114e-07
PFLU_0826	-2.56797	3.87567e-09
PFLU_0090	1.67281	8.55311e-05
PFLU_0187	2.12297	2.34279e-08
PFLU_1353	-2.10214	5.42814e-09
PFLU_0764	1.79198	7.56452e-09
PFLU_2126	-2.6329	0.000180866
PFLU_0520	-1.69955	1.37211e-08
PFLU_0308	-2.45648	1.05988e-09
PFLU_2218	-2.32857	2.0365e-09
PFLU_4396	-1.47711	4.10332e-08
PFLU_2591	2.31903	7.02413e-07
PFLU_5788	-1.96367	6.33251e-08
PFLU_5034	1.93637	7.62254e-09
PFLU_3635	1.98473	1.21852e-07
PFLU_4240	-1.95636	2.45776e-07
PFLU_2971	-2.61354	1.3648e-09
PFLU_4780	1.54489	3.52112e-05
PFLU_5361	-2.61028	2.4838e-10
PFLU_5521	2.00852	3.31983e-09
PFLU_1709	-1.60833	8.62401e-08
PFLU_3040	-1.78114	9.09431e-08
PFLU_3108	1.14698	0.00154873
PFLU_3014	-1.69609	8.65472e-08
PFLU_1995	2.27544	1.54895e-08
PFLU_0684	1.8129	3.49849e-06
PFLU_1000	-2.27587	4.06653e-08
PFLU_3631	-2.59328	1.96544e-06
PFLU_5078	1.99692	2.83087e-06
PFLU_5014	2.16353	3.90952e-09
PFLU_5593	-1.6934	1.04679e-08
PFLU_3221	-2.55495	9.22044e-07
PFLU_4190	-2.06543	1.99187e-10
PFLU_5504	2.12925	3.25278e-10
PFLU_4717	-1.63809	7.75389e-06
PFLU_3711	0.118933	0.842268
PFLU_1255	-2.58263	3.40328e-09
PFLU_4267	1.0512	0.0353752
PFLU_1070	2.57894	2.00455e-09
PFLU_4433	-2.04574	5.67881e-09
PFLU_0940	-1.50938	0.000227398
PFLU_5604	0.919508	0.109609
PFLU_3982	-2.32633	9.04903e-07
PFLU_0647	-2.2097	1.26014e-09
PFLU_3582	-1.92751	7.04983e-07
PFLU_3188	1.2606	0.00116481
PFLU_5118	1.6636	2.73281e-07
PFLU_0170	-1.86209	1.31795e-08
PFLU_2151	-0.739024	0.00280414
PFLU_2325	-1.75427	8.05337e-05
PFLU_1432	-2.02792	2.9146e-09
PFLU_3599	1.27535	6.43789e-05
PFLU_3356	-2.21946	7.41016e-09
PFLU_5333	-2.27906	2.64457e-10
PFLU_6134	2.049	6.09443e-09
PFLU_2368	1.61064	3.61123e-05
PFLU_5173	2.16735	5.01669e-09
PFLU_4458	-1.90275	1.66208e-06
PFLU_5502	2.11815	4.60898e-10
PFLU_5346	-1.53989	5.42928e-08
PFLU_5383	-2.5535	1.46786e-06
PFLU_3808	-1.76134	8.30645e-08
PFLU_4198	-1.53954	1.00435e-07
PFLU_5568	-1.19907	7.53158e-07
PFLU_1685	-0.967687	0.00397533
PFLU_0146	-0.832026	0.00183094
PFLU_0951	-1.68475	1.44915e-08
PFLU_1512	-1.99405	7.53731e-08
PFLU_0084	2.53072	3.54233e-11
PFLU_6020	1.95386	3.01694e-06
PFLU_5252	1.84744	2.08197e-07
PFLU_2900	1.23397	0.00189766
PFLU_3833	1.82946	4.5228e-05
PFLU_3275	2.52256	1.53965e-06
PFLU_3650	-1.15011	3.6589e-05
PFLU_1702	-1.50469	5.51509e-05
PFLU_5507	1.90608	1.82537e-08
PFLU_5486	1.56455	3.05811e-06
PFLU_5505	2.04075	4.9045e-10
PFLU_5432	-2.20737	1.68686e-09
PFLU_2648	-1.89404	5.59462e-08
PFLU_4319	-2.40734	2.17014e-11
PFLU_1717	-1.83648	7.91845e-09
PFLU_3136	-1.68762	1.60583e-07
PFLU_2987	1.41838	0.000153829
PFLU_2452	1.23711	0.0068716
PFLU_1225	-1.50812	5.09157e-08
PFLU_5254	1.90359	1.8425e-08
PFLU_4901	1.96581	2.78403e-08
PFLU_4116	-1.15668	4.58617e-06
PFLU_1368	-2.03238	1.76206e-10
PFLU_5335	-2.03549	8.58234e-10
PFLU_4205	1.84024	3.92642e-08
PFLU_5548	1.75554	4.99113e-08
PFLU_0949	-1.71402	3.51751e-07
PFLU_0255	1.99206	1.09254e-05
PFLU_5795	1.68258	1.49334e-06
PFLU_0943	-1.70995	2.6271e-08
PFLU_5520	1.9321	1.32777e-09
PFLU_0405	1.90897	8.9803e-09
PFLU_3192	-1.12885	0.000106977
PFLU_5256	2.2995	5.61274e-09
PFLU_1789	-1.33843	4.06653e-08
PFLU_4933	1.91583	8.36938e-10
PFLU_2791	-2.47023	4.10877e-05
PFLU_4460	-2.19354	3.66531e-07
PFLU_0392	-1.53713	2.42478e-07
PFLU_0945	-1.76788	2.40158e-08
PFLU_3515	-1.90463	1.89302e-06
PFLU_3291	2.45853	3.21446e-07
PFLU_3682	1.13213	0.00338839
PFLU_5501	2.01433	4.75644e-10
PFLU_0728	1.73621	2.07465e-05
PFLU_5724	1.70035	1.58429e-09
PFLU_4746	-1.04326	0.0002627
PFLU_0683	1.7815	4.41935e-09
PFLU_4325	-1.84424	9.03841e-05
PFLU_4499	1.66507	2.68231e-07
PFLU_4076	1.55074	0.0458302
PFLU_2706	-1.58993	2.08197e-07
PFLU_5516	2.14635	8.83411e-10
PFLU_3272	2.44502	7.65839e-07
PFLU_1643	1.89572	5.58908e-09
PFLU_4320	1.41193	8.74768e-06
PFLU_5540	2.03553	9.87133e-10
PFLU_3678	1.98453	3.61476e-05
PFLU_2045	-2.04789	8.88498e-06
PFLU_5772	2.00275	1.76252e-06
PFLU_3306	-2.24515	1.66253e-07
PFLU_1140	-2.36217	4.0154e-09
PFLU_2915	1.5692	2.94971e-08
PFLU_0691	-1.5029	1.25923e-08
PFLU_1302A	1.99244	1.65809e-08
PFLU_5139	1.4445	0.00085497
PFLU_2617	-0.888001	0.000181482
PFLU_1524	-1.53562	3.39098e-09
PFLU_1133	-2.03542	5.18315e-06
PFLU_0368	-2.17408	1.26014e-09
PFLU_4622	1.98213	6.60469e-06
PFLU_4249	-2.12082	6.17907e-09
PFLU_5968	-2.15909	1.45555e-08
PFLU_4207	1.72951	3.02374e-09
PFLU_5430	-1.97241	1.04215e-06
PFLU_3568	-2.3367	3.32124e-10
PFLU_2970	-2.03469	5.16866e-06
PFLU_4579	-1.77428	7.57745e-08
PFLU_5590	1.80552	5.04011e-07
PFLU_1163	2.35949	1.37304e-07
PFLU_2307	1.37878	0.000285765
PFLU_0519	-1.71403	8.68672e-08
PFLU_5544	-2.41684	3.07813e-09
PFLU_3970	1.58923	0.000119329
PFLU_3901	-2.26349	2.27572e-10
PFLU_4517	1.87395	3.1342e-05
PFLU_3049	-2.3173	4.71869e-09
PFLU_4461	2.4052	6.53989e-09
PFLU_0039	-1.80845	2.18144e-07
PFLU_0011	1.87568	4.96197e-08
PFLU_0553	-2.00439	1.49735e-08
PFLU_1139	-2.38527	1.07279e-10
PFLU_2530	1.55837	1.12373e-05
PFLU_1594	-1.53817	2.22225e-05
PFLU_3389	-1.68303	3.65568e-07
PFLU_5726	2.39433	3.85592e-11
PFLU_1319	-1.32893	3.59377e-06
PFLU_4701	1.6459	7.53307e-08
PFLU_2071	-1.44171	2.56519e-07
PFLU_4995	1.66033	5.09095e-06
PFLU_1903A	1.60291	0.000743329
PFLU_2382	1.78922	1.70475e-08
PFLU_1825	1.46237	4.54383e-05
PFLU_3390	-1.61095	1.42326e-06
PFLU_0903	1.90329	4.02252e-08
PFLU_4432	-2.1409	9.08366e-10
PFLU_3675	1.99263	0.000206032
PFLU_3874	2.0264	2.8804e-05
PFLU_2454	1.06162	0.0119189
PFLU_2953	-1.89075	1.01577e-06
PFLU_3443	-1.9078	2.29043e-06
PFLU_3204	-1.83026	7.62466e-07
PFLU_4321	1.48497	1.15143e-05
PFLU_3380	-2.06179	9.80474e-09
PFLU_5344	-1.25862	1.5143e-06
PFLU_3405	1.92315	8.55477e-09
PFLU_0731	1.73094	5.89741e-08
PFLU_1787	-1.43706	3.76055e-06
PFLU_1433	-1.71493	6.76478e-08
PFLU_6085	1.90538	1.64206e-06
PFLU_0704	-2.07391	3.06456e-07
PFLU_0614	1.62596	4.23325e-08
PFLU_2152	-0.632217	0.0138198
PFLU_0926	-1.84178	6.36719e-08
PFLU_0603	1.71898	1.3581e-06
PFLU_5506	1.87483	3.91878e-09
PFLU_1816	1.76155	8.33593e-09
PFLU_1050	2.1783	1.15406e-07
PFLU_0475	1.70413	9.64539e-09
PFLU_0017	1.70061	1.63018e-06
PFLU_5330	1.77807	1.63106e-07
PFLU_0956	-1.17293	2.13251e-06
PFLU_2246	1.13534	0.0145033
PFLU_1271	1.73856	7.01913e-09
PFLU_0319	-2.33962	3.46844e-09
PFLU_5345	-1.27907	1.52606e-06
PFLU_5725	2.21205	7.31963e-10
PFLU_2813	0.401749	0.203063
PFLU_1086	-1.74252	2.05921e-08
PFLU_3529	1.12782	0.00219369
PFLU_2587	-1.46591	5.55022e-06
PFLU_5253	1.82061	5.35774e-10
PFLU_0040	-1.38907	1.55758e-07
PFLU_2159	-1.25798	1.56934e-06
PFLU_5935	-1.34188	2.60542e-06
PFLU_4097	-1.71527	3.44501e-06
PFLU_0659	-1.75935	4.74296e-10
PFLU_5009	1.80443	4.82367e-08
PFLU_0942	-1.53004	1.05558e-06
PFLU_2220	-1.84747	1.55621e-08
PFLU_0709	-1.40321	1.42326e-06
PFLU_5886	1.71601	9.84429e-06
PFLU_5613	-1.20062	1.06028e-05
PFLU_2133	1.55134	0.000141962
PFLU_5823	1.72177	5.64133e-06
PFLU_4054	1.07885	0.0179901
PFLU_4664	-1.57684	8.30645e-08
PFLU_4010	-1.62199	2.19488e-08
PFLU_3334	2.06078	3.96522e-08
PFLU_3276	2.31044	2.39674e-07
PFLU_2271	-1.51031	5.15412e-09
PFLU_3616	1.12189	0.000106993
PFLU_0147	1.31955	0.000237645
PFLU_1788	-1.15063	2.44009e-05
PFLU_4742	1.50525	0.000265414
PFLU_3795	0.976495	0.00344538
PFLU_5514	1.87644	5.94928e-07
PFLU_0076	2.25158	3.92642e-08
PFLU_0447	-2.06973	7.17008e-07
PFLU_0364	-1.81465	3.53223e-08
PFLU_0342	1.76594	6.22698e-07
PFLU_5500	-1.20434	5.90516e-06
PFLU_0201	1.25342	0.0637778
PFLU_4833	1.13335	0.00115568
PFLU_3413	-0.331827	0.527449
PFLU_3719	0.352541	0.572764
PFLU_1920	1.4068	4.05152e-06
PFLU_5866	0.768956	0.0427518
PFLU_2073	-1.37196	1.78296e-06
PFLU_5517	1.94991	4.1776e-09
PFLU_5251	1.72063	5.83043e-09
PFLU_4862	-1.32738	5.9015e-07
PFLU_4668	1.42666	9.82073e-05
PFLU_1831	2.23297	7.92938e-10
PFLU_5571	-2.15103	8.99193e-10
PFLU_1570	-1.20522	2.06994e-06
PFLU_0737	1.4837	3.41952e-07
PFLU_1886	-1.54242	7.35628e-07
PFLU_0612	1.68717	2.0806e-06
PFLU_0556	-2.11501	1.58429e-09
PFLU_5596	-1.55042	5.09679e-07
PFLU_4738	-1.63185	3.96522e-08
PFLU_4694	-2.04287	2.71279e-09
PFLU_1040	-2.16901	4.01292e-11
PFLU_4099	-1.83951	1.8586e-06
PFLU_0611	1.69091	2.06286e-07
PFLU_5764	2.13049	1.62666e-07
PFLU_1682	2.04869	1.72612e-05
PFLU_1307	-1.82745	8.42917e-08
PFLU_1492	0.750194	0.00102842
PFLU_3079	-1.23448	2.50336e-05
PFLU_6067	-1.0096	0.000412878
PFLU_5673	2.25256	7.21566e-09
PFLU_4026	-1.8693	1.64612e-06
PFLU_6057	1.71647	0.000208907
PFLU_1853	-1.86927	1.8586e-06
PFLU_6027	1.57589	0.004254
PFLU_0946	-1.31583	3.26915e-06
PFLU_5218	1.93245	9.72263e-10
PFLU_5410	1.7454	4.98263e-08
PFLU_0788	-2.24761	0.000369754
PFLU_2474	2.24407	8.71904e-06
PFLU_5900	1.57651	7.32543e-07
PFLU_1067	1.63072	4.2436e-05
PFLU_1491	0.646238	0.00419099
PFLU_0950	-1.70452	2.51936e-08
PFLU_3165	2.233	1.61709e-09
PFLU_4559	-1.79041	2.5201e-09
PFLU_2788	-2.23132	2.88141e-07
PFLU_2466	0.895867	0.000420765
PFLU_4004	-2.22765	1.95531e-06
PFLU_4905	1.59018	1.6994e-07
PFLU_5134	1.7371	8.16108e-05
PFLU_5557	-1.63778	2.93477e-09
PFLU_6110	-1.58892	3.38232e-08
PFLU_3177	2.06192	2.89645e-09
PFLU_0863	1.81541	2.08215e-08
PFLU_5248	1.06853	0.000581885
PFLU_0877	-1.61503	3.01448e-07
PFLU_5017	1.62082	1.94988e-08
PFLU_5801	1.77964	6.32592e-07
PFLU_5144	1.79667	0.000294629
PFLU_0340	1.65184	6.44765e-06
PFLU_1278	1.66917	1.33598e-08
PFLU_0625	1.87773	6.38757e-06
PFLU_1046	-2.20113	8.69615e-05
PFLU_1866	1.84053	2.02721e-07
PFLU_1817	1.7372	3.7354e-07
PFLU_2028	1.51976	2.14525e-05
PFLU_2180	-1.03863	6.35934e-05
PFLU_4626	1.41655	0.000620261
PFLU_0895	1.88325	1.31595e-09
PFLU_5896	-2.19133	2.60055e-07
PFLU_2776	-2.19077	0.00191428
PFLU_3199	-0.417552	0.275559
PFLU_4098	-1.75623	6.23839e-07
PFLU_2571	-2.19036	3.38232e-08
PFLU_3446	0.232389	0.793012
PFLU_0482	1.48603	1.21776e-07
PFLU_2272	-1.52588	1.45555e-08
PFLU_3462	-1.32449	2.51539e-06
PFLU_3286	2.18513	2.36477e-07
PFLU_3786	1.66219	2.32031e-08
PFLU_5961	1.55667	3.7259e-05
PFLU_2922	-2.05317	3.5249e-09
PFLU_5200	1.57824	0.00415621
PFLU_3123	2.18057	1.18321e-06
PFLU_0592	-1.46434	0.000221809
PFLU_4104	-1.57723	1.65987e-07
PFLU_0682	1.49807	4.92129e-06
PFLU_4560	-1.63082	7.32033e-07
PFLU_5765	2.04263	1.63339e-07
PFLU_5395	1.61217	0.000345323
PFLU_5628	-2.17552	4.66805e-08
PFLU_5470	1.64073	2.45509e-09
PFLU_6024	1.29196	0.000971096
PFLU_1134	-1.63917	5.94928e-07
PFLU_1003	-1.87176	1.66445e-08
PFLU_3813	1.37721	2.00647e-06
PFLU_2651	1.8951	1.1634e-05
PFLU_3041	-1.49185	2.51082e-08
PFLU_5241	1.84759	6.9239e-07
PFLU_2724	-1.84791	5.65537e-07
PFLU_4103	-1.6384	4.18147e-09
PFLU_1436	-1.18026	3.57001e-06
PFLU_1299	1.60328	7.28486e-06
PFLU_0267	1.41303	1.01568e-06
PFLU_4395	-1.47982	1.63206e-08
PFLU_3129	-1.99206	5.55771e-07
PFLU_4170	1.28516	0.00478564
PFLU_0528	-2.15882	6.65612e-08
PFLU_0742	0.878999	0.00923603
PFLU_0010	1.67825	3.92642e-08
PFLU_5965	-1.43669	1.24075e-08
PFLU_6018	1.87495	9.22044e-07
PFLU_4326	1.94805	7.55624e-06
PFLU_3981	-1.33055	0.000180191
PFLU_5845	-1.5663	3.39894e-08
PFLU_5292	1.83211	4.27488e-06
PFLU_2642	1.5598	8.02287e-06
PFLU_5843	-1.56246	1.46491e-08
PFLU_3805	-0.944744	0.000417631
PFLU_0680	1.39249	6.4019e-07
PFLU_4399	1.92281	4.95483e-08
PFLU_5966	-1.89241	7.13339e-09
PFLU_2057	-2.03079	9.15412e-07
PFLU_2427	-0.239069	0.519888
PFLU_3747	-1.86698	6.91492e-09
PFLU_5841	-1.42706	1.17308e-06
PFLU_0028	-1.73866	6.9812e-09
PFLU_4625	1.33493	0.000757586
PFLU_4306	-1.6299	7.84884e-06
PFLU_0283	1.82928	7.67914e-08
PFLU_6086	1.93543	0.00136951
PFLU_0142	-1.53608	7.64816e-09
PFLU_1867	1.93263	1.605e-09
PFLU_3567	-1.99803	3.23823e-09
PFLU_5822	-1.47338	1.1229e-06
PFLU_1002	-1.71915	1.29647e-07
PFLU_0563	2.12783	8.86956e-06
PFLU_0894	1.60153	4.02252e-08
PFLU_1305	1.46229	0.00119776
PFLU_4556	-1.79654	0.01993
PFLU_0914	-2.04596	6.52879e-10
PFLU_1052	1.4087	9.01102e-08
PFLU_5595	-1.63624	5.29623e-08
PFLU_6121	1.41509	4.82367e-08
PFLU_5545	-2.12	8.58247e-10
PFLU_5137	1.33937	0.00149495
PFLU_3073	-1.16173	0.000126057
PFLU_5713	1.60553	5.57834e-07
PFLU_3533	0.758673	0.0453741
PFLU_5534	1.60823	4.92242e-09
PFLU_6079	-2.11085	3.42872e-10
PFLU_2674	1.83279	6.66198e-09
PFLU_1107	1.534	1.26925e-07
PFLU_0338	1.57805	3.33632e-06
PFLU_3195	1.03755	0.00950977
PFLU_0181	-1.8505	4.33741e-08
PFLU_2725	-1.46768	6.82418e-05
PFLU_4786	-1.60527	2.53868e-07
PFLU_6015	1.33989	0.000306649
PFLU_4294	-1.75843	3.39098e-09
PFLU_2160	-1.15875	1.08972e-05
PFLU_0939	-1.24927	7.44958e-05
PFLU_0465	1.60239	3.26862e-05
PFLU_0029	-1.40368	1.96112e-06
PFLU_4595	-1.17435	2.59538e-07
PFLU_0905	1.81773	3.99622e-08
PFLU_2120	1.31024	0.00062339
PFLU_4891	-2.09759	0.00198908
PFLU_2548	-1.22496	0.00276123
PFLU_0487	1.39453	1.20094e-06
PFLU_1161	1.35667	4.32956e-07
PFLU_4038	-1.46013	9.65902e-07
PFLU_5146	-2.09386	2.77289e-05
PFLU_5349	1.35887	0.000117144
PFLU_5515	1.72885	1.23134e-07
PFLU_2912	1.18436	0.000396231
PFLU_3868	1.94756	0.000202286
PFLU_0761	1.36213	7.78755e-08
PFLU_3200	1.06889	0.00267863
PFLU_3122	2.09018	4.22408e-08
PFLU_3135	-1.51085	3.82979e-06
PFLU_5250	1.84634	9.10789e-05
PFLU_5403	1.3906	0.000814297
PFLU_4885	1.60061	1.86188e-05
PFLU_4685	2.08504	1.3317e-08
PFLU_5026	1.11336	0.00113389
PFLU_0664	1.19795	0.00203883
PFLU_5777	2.07815	3.3693e-08
PFLU_4345	1.80813	6.14836e-08
PFLU_1664	-1.17537	3.18756e-06
PFLU_1776	-1.14625	6.26969e-05
PFLU_4695	-1.82627	1.58022e-08
PFLU_1049	1.51694	9.88385e-06
PFLU_5007	1.61493	7.29543e-09
PFLU_4273	0.535864	0.314027
PFLU_0780	1.74605	1.31201e-07
PFLU_1714	1.54695	7.08079e-08
PFLU_1671	-1.40641	2.01601e-06
PFLU_6026	1.62358	3.55676e-07
PFLU_3748	-1.79905	5.80341e-09
PFLU_0225	-2.06335	4.16489e-06
PFLU_5816	1.66743	3.86366e-06
PFLU_2555	-2.06133	1.24746e-05
PFLU_5607	-1.67815	6.98524e-05
PFLU_3173	2.05961	1.4852e-05
PFLU_1035	-2.05925	1.54008e-07
PFLU_4624	1.27337	0.0012527
PFLU_2266	-1.14909	2.82422e-06
PFLU_1450	1.92985	2.00647e-06
PFLU_0767	1.51557	6.74209e-07
PFLU_5433	-1.66781	4.00879e-08
PFLU_1653	1.45037	0.000633785
PFLU_3759	2.05316	3.30028e-07
PFLU_6039	-1.45856	9.17059e-08
PFLU_0938	-1.08946	0.00189688
PFLU_5612	-1.04399	2.29166e-05
PFLU_5704	-1.57451	3.8309e-07
PFLU_4764	1.84845	6.91029e-05
PFLU_5872	-1.68456	8.52823e-09
PFLU_2473	2.04696	6.13433e-06
PFLU_1998	2.04589	2.88566e-09
PFLU_5011	1.54247	2.43807e-07
PFLU_3153	1.52666	0.000138369
PFLU_4507	1.45223	6.72586e-08
PFLU_5099	1.69446	0.000809971
PFLU_1206	-1.48423	0.000148147
PFLU_5952	2.02447	1.59548e-07
PFLU_1069	1.85914	8.68975e-07
PFLU_2290	-1.6836	1.86817e-09
PFLU_3798	1.53446	1.25562e-05
PFLU_0144	-0.859318	4.55266e-05
PFLU_1220	-0.992141	0.00122875
PFLU_4795	-1.58449	7.8434e-07
PFLU_4096	-1.72637	6.89209e-07
PFLU_0899	-1.38708	5.76795e-08
PFLU_4645	-1.68874	4.87209e-08
PFLU_1654	1.46221	0.000234514
PFLU_1558	1.40033	5.67779e-09
PFLU_6007	1.86128	1.65041e-08
PFLU_4362	-1.34525	1.86472e-07
PFLU_3224	-1.90002	3.51728e-09
PFLU_2364	0.949308	0.0147501
PFLU_0103	1.8182	1.00785e-05
PFLU_1493	0.488005	0.0654634
PFLU_4593	-1.13687	5.77624e-07
PFLU_1715	2.01133	0.00022702
PFLU_2843	-1.40579	3.31558e-05
PFLU_4806	1.5252	9.45779e-05
PFLU_4329	-0.994492	0.00663058
PFLU_4627	1.22212	0.00333479
PFLU_2223	-1.66966	1.98079e-07
PFLU_3623	1.13105	0.00014463
PFLU_1126	-0.778642	0.00102842
PFLU_0143	-1.00713	1.00785e-05
PFLU_6082	-1.40531	4.74544e-07
PFLU_1818	1.47104	1.06267e-06
PFLU_1215	-2.00414	1.43006e-06
PFLU_3198	0.905593	0.0230395
PFLU_1055	1.29665	6.11145e-06
PFLU_4558	-1.66458	2.98576e-09
PFLU_6019	1.29446	0.000429187
PFLU_2981	-1.99793	1.4037e-09
PFLU_5411	1.50745	3.49426e-07
PFLU_5994	1.35552	1.37304e-07
PFLU_1369	-1.34835	6.70858e-08
PFLU_2777	1.83811	7.58505e-07
PFLU_5003	1.14047	0.000254037
PFLU_0343	-0.796795	0.00110191
PFLU_3561	1.13068	0.00399899
PFLU_2677	1.77292	3.45568e-06
PFLU_2303	-1.95888	1.77592e-08
PFLU_3952	-1.98828	0.000187015
PFLU_0145	-0.722013	0.000541761
PFLU_1999	1.98496	1.8896e-09
PFLU_0031	1.98356	5.01797e-08
PFLU_0838	1.31216	6.79128e-07
PFLU_2322	-1.08086	2.50686e-05
PFLU_5267	1.98066	4.041e-08
PFLU_1864	1.52566	3.2377e-05
PFLU_1747	-1.16462	3.85767e-08
PFLU_4009	-1.63556	4.19633e-09
PFLU_4861	-1.52499	9.32851e-09
PFLU_1114	-1.34604	5.59462e-08
PFLU_5276	1.51085	5.43405e-06
PFLU_1704	1.58282	3.05341e-08
PFLU_3695	0.565297	0.390242
PFLU_1413	-1.97525	0.000135206
PFLU_3320	1.86152	0.00205426
PFLU_3391	-1.58824	7.65913e-07
PFLU_2385	-1.97437	8.16108e-05
PFLU_0253	1.36815	0.00650806
PFLU_1216	1.72182	5.91312e-08
PFLU_0481	1.44964	1.62437e-07
PFLU_3363	1.92203	2.14668e-10
PFLU_3551	-0.957547	5.2744e-05
PFLU_4592	-1.08324	8.023e-07
PFLU_2244	0.938727	0.00590435
PFLU_3753	1.07036	0.000185775
PFLU_4634	1.33877	0.000146629
PFLU_5273	1.58651	1.45363e-08
PFLU_5371	-1.33165	3.96999e-07
PFLU_2123	-1.7879	2.59988e-07
PFLU_1092	1.3532	0.120871
PFLU_1854	-1.64717	1.69228e-05
PFLU_3987	-1.59991	0.000144833
PFLU_5732	-1.41203	2.80973e-07
PFLU_6008	1.9634	3.38232e-08
PFLU_5844	-1.45042	5.02688e-08
PFLU_5995	1.29579	8.54912e-07
PFLU_4665	-1.08021	1.7551e-05
PFLU_5766	1.34121	1.73338e-05
PFLU_3086	1.96028	3.47784e-07
PFLU_4796	-1.28438	1.45726e-06
PFLU_0277	1.88445	1.28387e-08
PFLU_0825	-1.94217	8.35179e-08
PFLU_4666	-1.47916	2.54695e-06
PFLU_2108	-1.42221	1.54763e-08
PFLU_3585	-1.52993	1.45392e-06
PFLU_0538	1.18891	4.62271e-07
PFLU_3620	1.95383	0.0178203
PFLU_4561	-1.60822	2.77471e-08
PFLU_4316	-1.44153	0.000364834
PFLU_4794	-1.95213	0.000521763
PFLU_3174	1.24767	0.00129503
PFLU_0862	1.5312	4.042e-07
PFLU_4748	1.49329	6.1403e-07
PFLU_3431	1.52204	0.000309392
PFLU_0867	-1.34122	1.30142e-07
PFLU_4261	1.94535	4.59499e-06
PFLU_1477	1.56059	3.22579e-08
PFLU_0180	-1.50093	2.28745e-07
PFLU_2618	-0.619931	0.0137886
PFLU_3315	1.93708	5.43538e-05
PFLU_5996	1.47814	8.38006e-08
PFLU_5209	-0.922852	2.33928e-05
PFLU_1146	1.45644	2.65105e-08
PFLU_2359	1.47408	2.73336e-05
PFLU_3225	-1.93945	9.04287e-09
PFLU_5533	1.52565	3.40693e-08
PFLU_5857	0.921579	0.0155774
PFLU_4594	-1.0782	1.05369e-06
PFLU_4475	1.48588	3.15213e-06
PFLU_1434	1.49336	0.00338839
PFLU_5149	-1.11251	0.00256465
PFLU_2607	1.936	3.28414e-05
PFLU_5917	-1.93566	3.43975e-08
PFLU_5119	1.48223	2.77863e-05
PFLU_3024	1.76029	1.29541e-07
PFLU_0329	1.49132	0.000327374
PFLU_2562	0.0059715	0.993589
PFLU_1683	1.75291	3.53221e-05
PFLU_6060	-1.50987	2.06161e-06
PFLU_1209	-1.34219	3.04901e-06
PFLU_5211	-0.958138	8.74532e-06
PFLU_3693	-1.38298	4.43402e-06
PFLU_1571	-0.94207	6.17264e-06
PFLU_0913	-1.55697	4.042e-07
PFLU_3975	-1.79389	1.23694e-06
PFLU_1935	0.404528	0.754597
PFLU_3676	1.4392	0.000135305
PFLU_2745	-1.80845	1.44654e-06
PFLU_1370	-1.17416	4.06643e-07
PFLU_2301	1.69354	3.79017e-07
PFLU_2332	0.65254	0.0927178
PFLU_2221	-1.50922	4.73876e-06
PFLU_1292	-1.28516	3.71508e-05
PFLU_0166	-1.35597	1.84867e-05
PFLU_4270	0.517577	0.148236
PFLU_0568	1.40776	1.12944e-05
PFLU_0020	-1.91216	2.80439e-09
PFLU_0947	-1.13629	2.24943e-05
PFLU_1996	1.90948	1.1229e-06
PFLU_0075	1.779	2.06285e-07
PFLU_6017	1.57668	3.41952e-07
PFLU_3097	1.25804	3.60295e-06
PFLU_4266	0.734774	0.222345
PFLU_4825	-1.06029	2.44827e-06
PFLU_4275	0.603269	0.102603
PFLU_1596	-1.7423	9.17642e-06
PFLU_1226	1.31972	2.44827e-06
PFLU_3684	-1.33323	8.32932e-07
PFLU_0476	1.21207	2.44834e-05
PFLU_2996	0.903502	0.0113158
PFLU_1260	-1.14635	3.9095e-06
PFLU_2162	-0.614897	0.0130668
PFLU_1261	-1.36884	4.14384e-07
PFLU_1476	1.57833	3.766e-07
PFLU_4256	-1.52625	1.59771e-06
PFLU_2572	-1.75185	3.4997e-08
PFLU_0768	1.2804	8.24424e-07
PFLU_0770	1.29456	6.91037e-06
PFLU_6016	1.40513	0.000422326
PFLU_5555	1.14525	0.000672066
PFLU_1045	-1.50147	0.00248168
PFLU_5474	1.411	1.25854e-05
PFLU_3740	-1.40331	1.45192e-06
PFLU_4268	0.828406	0.0772257
PFLU_5469	1.50271	3.08365e-06
PFLU_4860	-1.53777	1.60381e-09
PFLU_1102	-1.25424	9.07529e-06
PFLU_4588	-1.46715	4.67294e-09
PFLU_0712	-1.50171	0.0106479
PFLU_4313	1.22871	1.27111e-06
PFLU_0105	1.68745	3.07765e-05
PFLU_5024	0.48673	0.13595
PFLU_0757	-1.39828	9.54465e-05
PFLU_3513	1.3812	2.08306e-06
PFLU_6075	1.31171	2.98068e-06
PFLU_5771	1.6378	7.8293e-05
PFLU_1254	-1.08573	1.75395e-06
PFLU_0139	-1.51752	2.37622e-08
PFLU_3194	0.809765	0.01986
PFLU_1807	-1.63334	0.000210526
PFLU_5043	1.29708	5.31355e-08
PFLU_5372	-1.24676	5.41618e-07
PFLU_3087	1.8813	2.05402e-06
PFLU_0561	1.88122	3.82564e-05
PFLU_3925	1.46591	6.75676e-08
PFLU_3096	1.12347	4.75565e-06
PFLU_1592	0.688569	0.113424
PFLU_5846	-0.90283	0.000284898
PFLU_3749	-1.87613	2.8101e-07
PFLU_5831	1.30685	2.29415e-05
PFLU_1105	1.27902	3.26915e-06
PFLU_5309	-1.85054	6.40832e-09
PFLU_4830	-1.49852	7.52583e-06
PFLU_2962	1.69215	0.00871972
PFLU_4578	1.32912	1.09718e-07
PFLU_5219	1.61087	2.52516e-07
PFLU_0932	1.73105	4.2462e-08
PFLU_3707	-0.610067	0.0384143
PFLU_5780	1.46098	5.35684e-08
PFLU_0034	1.85958	1.6487e-06
PFLU_5421	1.375	3.72255e-06
PFLU_1614	1.85888	7.41945e-06
PFLU_4309	-0.852087	0.00635095
PFLU_3852	-1.30077	0.000132563
PFLU_4674	1.24842	0.00831765
PFLU_0113	1.46281	5.61963e-07
PFLU_4522	0.400571	0.0960516
PFLU_5684	1.37154	1.37843e-05
PFLU_3036	-1.25188	3.15042e-06
PFLU_2267	-1.1222	3.01264e-06
PFLU_1478	1.36846	2.91048e-07
PFLU_1565	1.05984	1.66101e-05
PFLU_0927	-1.24148	2.73281e-07
PFLU_1223	-1.18107	2.57888e-06
PFLU_5482	1.49649	1.96213e-05
PFLU_2635	1.70279	1.26689e-05
PFLU_3767	1.84658	9.43637e-05
PFLU_2027	1.49557	2.74806e-07
PFLU_1601	-1.1965	2.40317e-06
PFLU_5736	-1.26655	7.11237e-05
PFLU_0227	1.42908	0.000869638
PFLU_3958	-1.84458	6.38873e-05
PFLU_5678	-0.994538	9.6159e-05
PFLU_4036	0.627785	0.0249266
PFLU_2599	0.621727	0.355732
PFLU_5062	-1.21156	3.97216e-06
PFLU_4898	-1.57759	1.74678e-09
PFLU_6120	1.12876	1.84346e-06
PFLU_3098	1.54643	7.17926e-07
PFLU_5735	-1.51412	5.29363e-06
PFLU_3412	-0.809599	0.00212157
PFLU_2980	-1.83388	8.39974e-08
PFLU_0488	1.67346	0.00481156
PFLU_0485	-1.66636	1.05209e-08
PFLU_3690	-1.83166	4.37435e-05
PFLU_2793	0.909459	0.000365363
PFLU_1246	-1.83035	3.30171e-07
PFLU_4772	1.08512	2.79681e-05
PFLU_0800	-0.708346	0.000528122
PFLU_0928	-0.598255	0.00682717
PFLU_2964	1.64711	0.0068716
PFLU_0976	1.82826	2.81243e-07
PFLU_1211	-1.47169	2.51539e-06
PFLU_4188	1.14851	1.63786e-05
PFLU_5842	-1.19428	4.93668e-06
PFLU_5938	1.18201	0.000488613
PFLU_4855	1.71673	4.36073e-08
PFLU_2486	-1.75939	2.47352e-08
PFLU_1291	1.4627	1.54115e-07
PFLU_3317	1.69302	1.64057e-05
PFLU_1308	-1.47161	4.53611e-08
PFLU_2150	-0.356243	0.0849808
PFLU_3491	1.81274	3.44581e-05
PFLU_1374	-1.23729	8.74532e-06
PFLU_3374	-1.15734	0.000103029
PFLU_2984	1.45606	5.03311e-06
PFLU_3965	-1.46925	3.49507e-06
PFLU_3721	0.24121	0.601835
PFLU_0339	1.16376	0.000576004
PFLU_0266	1.29317	5.85038e-08
PFLU_2991A	1.31605	5.26815e-08
PFLU_1309	-1.28636	4.74921e-06
PFLU_3977	-1.77709	3.7934e-05
PFLU_3661	1.00824	0.0119767
PFLU_0112	1.67225	5.10236e-05
PFLU_5332	-1.41477	5.25043e-07
PFLU_0455	0.782591	0.000324838
PFLU_0593	-1.80183	5.11754e-08
PFLU_4324	-1.80174	0.000567866
PFLU_4926	1.60855	3.06958e-06
PFLU_2564	-1.14633	0.000277438
PFLU_5973	1.78738	9.64295e-07
PFLU_6055	1.4411	5.10819e-06
PFLU_1806	1.00527	0.00385264
PFLU_3216	-1.34467	0.00177604
PFLU_2956	-0.541528	0.647102
PFLU_0311	1.40163	1.67414e-05
PFLU_3653	-1.10391	1.13581e-05
PFLU_2070	-0.428494	0.0357755
PFLU_2425	-1.74784	0.000109196
PFLU_3617	0.634472	0.0250398
PFLU_2433	-1.64464	6.90243e-07
PFLU_0941	-1.0775	2.44267e-05
PFLU_0815	1.21677	0.00647246
PFLU_4564	-1.40804	4.35203e-07
PFLU_1976	-1.55973	4.2458e-06
PFLU_1389	1.67704	8.19665e-06
PFLU_3488	-1.27606	2.06285e-07
PFLU_1793	-1.35941	3.26713e-06
PFLU_0307	1.30016	0.00372284
PFLU_0071	0.986803	0.00237977
PFLU_4476	-0.475101	0.0401603
PFLU_2850	-0.911747	0.0391729
PFLU_3574	-1.7846	2.25931e-05
PFLU_4064	-0.934092	0.20705
PFLU_0400	0.828393	0.0104199
PFLU_0831	-1.5831	1.41554e-07
PFLU_0016	1.15647	5.71764e-05
PFLU_3226	-1.6591	6.67444e-07
PFLU_1419	-1.71608	4.43369e-06
PFLU_0934	1.24751	0.0146955
PFLU_3197	0.801048	0.0739037
PFLU_5217	1.61737	3.18013e-07
PFLU_0158	1.39564	0.0512937
PFLU_3894	-0.924469	7.06924e-05
PFLU_3501	-1.45425	0.000526648
PFLU_4211	0.734367	0.00055227
PFLU_3930	1.43248	9.94071e-08
PFLU_3951	-1.14606	3.74848e-05
PFLU_1759	-1.67386	4.18044e-09
PFLU_1001	-1.37913	1.10502e-06
PFLU_3141	-1.77305	2.13002e-08
PFLU_1666	-1.36265	1.67962e-07
PFLU_3085	1.77055	3.15042e-06
PFLU_5350	0.997082	0.00117814
PFLU_4603	1.10067	3.46931e-06
PFLU_3476	1.7656	6.54658e-07
PFLU_3658	1.41534	1.91929e-05
PFLU_3353	-1.36119	1.16726e-07
PFLU_4769	-1.76274	6.88873e-05
PFLU_5352	-1.26078	7.61874e-07
PFLU_3277	1.39827	1.49334e-06
PFLU_4947	-0.559208	0.0759981
PFLU_1539	0.961341	0.000376129
PFLU_1758	1.33534	0.00438516
PFLU_0591	-1.04278	0.00306805
PFLU_4749	1.75928	2.77775e-09
PFLU_0873	-1.75853	1.09302e-05
PFLU_0531	-1.32955	2.59988e-07
PFLU_0776	-1.75439	7.65274e-08
PFLU_1253	-1.16712	3.05924e-07
PFLU_0295	-1.36094	9.93987e-06
PFLU_2043	-1.4926	0.00114371
PFLU_0954	1.64388	3.36556e-05
PFLU_2723	-1.06122	8.2914e-06
PFLU_4500	1.5154	2.21737e-06
PFLU_4863	-0.802493	0.00186253
PFLU_3613	1.08116	0.000677092
PFLU_4519	1.39588	6.87372e-06
PFLU_3305	-1.39647	3.72815e-05
PFLU_1519	1.35263	2.05631e-06
PFLU_5796	-1.64294	5.62706e-08
PFLU_3615	0.720565	0.0105407
PFLU_2550	-1.28957	0.0011476
PFLU_5027	0.652441	0.0227246
PFLU_3393	-1.46675	5.41594e-06
PFLU_3793	1.58918	0.000381846
PFLU_5257	1.29702	2.42962e-05
PFLU_0590	-1.7361	8.12737e-05
PFLU_3510	-1.36464	1.64663e-06
PFLU_5611	-1.04977	1.69479e-06
PFLU_0093	1.02533	0.00100713
PFLU_3335	-1.09911	1.86598e-05
PFLU_5847	-0.765827	0.00352169
PFLU_4135	0.672909	0.316847
PFLU_2443	0.698182	0.0265496
PFLU_4380	1.73066	1.84439e-08
PFLU_3614	0.974883	0.00540626
PFLU_5229	-1.56255	2.35239e-06
PFLU_0148A	1.60651	0.023565
PFLU_2086	-1.45181	1.80651e-09
PFLU_1878	1.25978	5.97405e-05
PFLU_1665	-1.25427	1.80949e-05
PFLU_1066	1.04366	0.00404294
PFLU_0191	-1.27101	2.5515e-06
PFLU_2371	1.06167	0.000533148
PFLU_1767	1.38969	5.23011e-07
PFLU_6122	1.17096	2.83727e-07
PFLU_3633	-1.38571	7.23472e-07
PFLU_0837	1.52327	1.24075e-08
PFLU_0467	0.989592	0.00542321
PFLU_3301	1.67726	3.13046e-08
PFLU_3134	0.92994	0.000854708
PFLU_3316	1.70442	1.8311e-06
PFLU_0944	-0.879261	0.000160419
PFLU_1896	1.66478	4.27511e-06
PFLU_4682	1.71379	7.02055e-08
PFLU_5162	1.61821	3.05215e-08
PFLU_2082	-0.911553	0.000353586
PFLU_2219	-1.22514	1.38776e-05
PFLU_1823	1.19732	1.26507e-06
PFLU_3160	1.62725	9.17059e-08
PFLU_2804	-1.7102	1.72147e-08
PFLU_1265	1.22203	2.59033e-05
PFLU_2304	-1.02916	1.4411e-06
PFLU_4523	0.842383	0.000219598
PFLU_1015	-1.01146	0.0159294
PFLU_2331	0.391072	0.252689
PFLU_2546	-1.4805	8.09833e-08
PFLU_4649	-1.60504	0.00582708
PFLU_0850	1.70248	8.64897e-06
PFLU_0713	-0.954731	0.0282026
PFLU_0325	-1.06447	2.29166e-05
PFLU_4322	0.849514	0.00330665
PFLU_3414	-0.973155	0.000206263
PFLU_0562	1.69689	1.29424e-05
PFLU_3445	-1.28873	1.77019e-05
PFLU_3640	0.131819	0.705987
PFLU_4745	-1.69524	1.81792e-10
PFLU_6095	1.51589	5.59175e-06
PFLU_5637	1.30683	4.45021e-05
PFLU_5472	1.36871	1.0727e-06
PFLU_1234	0.935605	0.028975
PFLU_4264	1.0089	0.0151866
PFLU_4787	-1.691	2.08758e-05
PFLU_2031	-0.669236	0.00232722
PFLU_2360	-1.3584	8.24991e-07
PFLU_2178	-1.66845	9.46463e-05
PFLU_5323	-0.863768	0.000179162
PFLU_1448	1.55435	0.000699194
PFLU_1667	-1.42726	7.04351e-07
PFLU_1727	0.0311742	0.937553
PFLU_3964	-1.4263	1.18321e-06
PFLU_5073	1.68243	3.49426e-07
PFLU_1694	-0.927715	0.00278015
PFLU_1827	1.68195	0.000208907
PFLU_5377	1.07347	7.91493e-05
PFLU_2135	1.26096	4.77035e-07
PFLU_2270	-1.34103	4.13841e-08
PFLU_4163	1.33185	4.07614e-05
PFLU_4181	-1.20783	3.05924e-07
PFLU_3535	0.671644	0.00204405
PFLU_4890	-1.67728	0.00106011
PFLU_5984	1.06974	0.0013614
PFLU_4884	-1.67705	1.38819e-08
PFLU_1726	1.06247	0.00023207
PFLU_2621	-0.593814	0.00952517
PFLU_1111	-1.44459	1.96341e-06
PFLU_3709	0.998247	8.3726e-05
PFLU_3223	-1.67348	6.37864e-08
PFLU_2676	1.46192	3.13308e-08
PFLU_4389	-1.51347	0.000634153
PFLU_5645	1.37194	0.000183614
PFLU_0521	-1.14965	1.57468e-07
PFLU_2654	0.463352	0.171747
PFLU_3588	-1.37549	2.26203e-05
PFLU_2021	-0.910475	0.000433759
PFLU_5579	-1.39307	4.9793e-07
PFLU_2824	0.834535	0.0726313
PFLU_1148	-1.49731	0.00037981
PFLU_2242	1.0217	1.28373e-05
PFLU_0495	-0.723915	0.000239154
PFLU_0931	-0.797019	0.000128199
PFLU_4718	-1.14375	6.43621e-07
PFLU_1720	1.66302	9.4987e-07
PFLU_4274	0.936723	0.0615373
PFLU_1018	-0.862356	1.54645e-05
PFLU_4297	-0.948319	0.000675121
PFLU_0109	1.6609	0.00198862
PFLU_4128D	-1.26679	1.89258e-06
PFLU_3545	-1.57005	0.0130057
PFLU_0733	1.39075	2.72746e-05
PFLU_3196	0.647437	0.0658775
PFLU_3806	-0.797905	0.00428199
PFLU_0779	1.42388	5.8438e-08
PFLU_0223	-1.3431	0.000341928
PFLU_1881	-1.09078	1.91917e-05
PFLU_3050	-1.0277	0.000569005
PFLU_5147	0.912453	0.0543269
PFLU_4128C	-0.998447	2.99628e-05
PFLU_2733	-1.39337	1.24247e-07
PFLU_2994	-0.805631	0.00452564
PFLU_5434	-1.03328	1.07376e-05
PFLU_3222	-1.64763	8.10753e-07
PFLU_3896	-1.37169	3.60455e-07
PFLU_2731	-1.10881	0.000251459
PFLU_3109	0.961622	0.00332567
PFLU_3775	-1.64492	2.33827e-07
PFLU_2421	-1.49788	0.00455738
PFLU_0022	1.329	5.11754e-08
PFLU_1672	-0.987513	9.33808e-05
PFLU_1868	1.40797	6.98097e-07
PFLU_1332	-1.28332	8.50738e-08
PFLU_5314	-1.21407	1.62486e-06
PFLU_2698	-0.937361	0.011587
PFLU_0898	-1.07786	5.12691e-07
PFLU_3387	-0.527188	0.0872224
PFLU_1505	-1.31334	1.10393e-06
PFLU_0240	-1.21174	0.000790882
PFLU_3926	1.46817	4.34309e-07
PFLU_5458	-1.63979	5.24852e-06
PFLU_2568	-1.45381	4.80682e-07
PFLU_1640	0.922941	1.69979e-05
PFLU_5415	-1.20137	3.54788e-07
PFLU_2846	-0.902897	0.000185778
PFLU_3946	1.08167	0.000569022
PFLU_2620	-0.447918	0.0638913
PFLU_2596	0.132836	0.789915
PFLU_6104	1.33366	3.03623e-06
PFLU_3855	-1.42712	0.000578503
PFLU_4122A	1.38144	5.89288e-05
PFLU_2333	0.68586	0.0851273
PFLU_0830	-0.964888	0.00021726
PFLU_1582	-1.19812	2.44538e-07
PFLU_2164	-0.228535	0.451963
PFLU_3478	-1.38547	8.38355e-05
PFLU_3873	1.29442	2.02721e-07
PFLU_6013	1.16183	1.42938e-05
PFLU_3236	1.22705	0.00023849
PFLU_5964	-1.01427	1.48759e-06
PFLU_4791	-1.19534	1.60033e-07
PFLU_2737	1.62341	9.51844e-07
PFLU_3265	-1.02652	0.00020847
PFLU_0203	0.481804	0.268692
PFLU_0727	-0.840662	0.0154372
PFLU_0527	-1.62256	3.49178e-06
PFLU_1311	-1.11757	1.80449e-05
PFLU_0211	1.22491	4.16489e-06
PFLU_1156	1.32346	2.64513e-07
PFLU_3632	-1.51441	3.55266e-05
PFLU_0479	1.44397	3.58251e-06
PFLU_0140	-1.53934	5.68236e-09
PFLU_0003	0.981341	4.48954e-05
PFLU_5117	1.41715	0.00226734
PFLU_2766	0.817556	4.97286e-05
PFLU_0634	1.61558	1.18963e-06
PFLU_2721	0.913282	0.0643315
PFLU_3392	-1.18378	2.48057e-06
PFLU_6119	0.977	6.2006e-07
PFLU_5355	0.813849	6.1054e-05
PFLU_3235	0.583958	0.0990975
PFLU_4193	1.20984	1.54267e-07
PFLU_5710	1.32878	0.00198513
PFLU_0394	-1.01597	1.34488e-05
PFLU_4959	0.752945	0.00206126
PFLU_6072	0.358446	0.233474
PFLU_4553	-1.01618	0.200087
PFLU_2155	-1.17516	1.59937e-06
PFLU_4074	-0.339271	0.721821
PFLU_4391	-1.06867	2.45483e-06
PFLU_5463	1.21338	0.000799655
PFLU_5136	1.21965	7.38205e-05
PFLU_5025	0.495696	0.15985
PFLU_5712	0.937535	1.35673e-05
PFLU_2449	0.887746	0.062282
PFLU_1467	1.41958	0.000101011
PFLU_4068	-1.09676	0.00217722
PFLU_1608	-1.60292	0.000613272
PFLU_2386	-1.17123	3.27055e-05
PFLU_4808	-1.24089	1.09978e-07
PFLU_4897	-1.16035	2.24943e-05
PFLU_1135	-1.29986	1.39682e-06
PFLU_1214	-1.52872	0.000113294
PFLU_1699	1.13778	1.10434e-05
PFLU_4896	-0.983776	0.00324451
PFLU_0663	1.03121	0.000193952
PFLU_0213	-1.02932	2.59772e-05
PFLU_5015	1.30739	3.1831e-05
PFLU_5328	0.907209	0.00239421
PFLU_1494	0.335549	0.262109
PFLU_4683	1.59151	5.09095e-06
PFLU_6066	-0.516309	0.0886821
PFLU_1300	1.30037	2.7125e-06
PFLU_2047	-1.59077	0.00132768
PFLU_5889	-1.59076	4.01985e-07
PFLU_2675	1.41823	7.36385e-08
PFLU_5603	1.46604	5.79738e-06
PFLU_5338	-1.08549	0.00239428
PFLU_6130	-1.59034	6.70263e-06
PFLU_3155	0.741266	0.000971166
PFLU_1612	1.07757	0.0361972
PFLU_3673	1.19809	8.11023e-05
PFLU_3500	-1.3245	0.00132356
PFLU_0251	1.19127	7.20211e-06
PFLU_2330	-0.764705	0.0689819
PFLU_5189	-0.886452	0.000128117
PFLU_4222	-0.938749	0.00330246
PFLU_2156	-0.875212	0.000237792
PFLU_1606	-0.375965	0.0671062
PFLU_4539	1.13268	1.24457e-06
PFLU_3383	1.5835	1.63856e-05
PFLU_4859	-1.5666	1.07359e-07
PFLU_0265	0.99525	9.7624e-05
PFLU_2870	0.964461	0.00230036
PFLU_1012	-1.35302	0.102603
PFLU_5306	0.213316	0.654035
PFLU_2615	0.573618	0.169445
PFLU_4809	1.44297	2.09822e-06
PFLU_5072	0.901316	3.15428e-05
PFLU_5168	1.27042	7.65274e-08
PFLU_1520	-1.21691	6.34835e-07
PFLU_1940	0.874135	0.0162804
PFLU_4712	1.22862	8.03616e-05
PFLU_5546	1.07515	5.28526e-06
PFLU_4114	1.34743	1.95494e-05
PFLU_2509A	1.21791	0.00894007
PFLU_2256	1.18383	0.00205065
PFLU_4611	1.34021	0.00493853
PFLU_4902	1.28775	7.80539e-08
PFLU_0041	1.56561	2.21127e-08
PFLU_2029	-0.515999	0.0130682
PFLU_2281	-1.21556	0.00016202
PFLU_4966	-1.45821	5.97405e-05
PFLU_0437	1.15728	3.08365e-06
PFLU_4449	-1.56194	8.38006e-08
PFLU_1212	-1.39225	1.51874e-06
PFLU_0558	1.11941	0.00026425
PFLU_2653	0.814489	0.000542134
PFLU_1468	1.55939	1.98433e-05
PFLU_3843	0.942495	0.0131864
PFLU_0183	1.09191	0.000863543
PFLU_3512	1.1302	0.000971393
PFLU_1824	1.04741	8.13101e-06
PFLU_3033	0.0218805	0.97012
PFLU_1030	-0.980642	2.60846e-05
PFLU_1591A	-1.50227	1.97116e-05
PFLU_3217	-1.55514	3.15801e-05
PFLU_4647	1.16282	5.04572e-06
PFLU_2462	0.895301	0.0275188
PFLU_5223	1.22084	1.05558e-06
PFLU_2136	0.979868	8.18091e-05
PFLU_4980	1.5526	0.000178216
PFLU_1639	1.34797	9.83118e-07
PFLU_0344	-0.568955	0.00250574
PFLU_4078	0.554955	0.372968
PFLU_4296	-1.55013	0.000371876
PFLU_4291	0.595455	0.0720852
PFLU_4904	1.05997	2.42393e-05
PFLU_5782	1.22685	9.16277e-05
PFLU_2969	-1.48363	1.6336e-06
PFLU_0849	1.54572	0.000110163
PFLU_4950	0.79194	0.000219087
PFLU_2559	-0.78644	0.00218154
PFLU_3750	-1.54468	2.98752e-06
PFLU_4394	-0.828858	1.95445e-05
PFLU_0640	-0.582454	0.00985947
PFLU_1325	1.54177	1.1843e-07
PFLU_3916	0.95896	0.000494316
PFLU_6103	1.26724	0.00117881
PFLU_4228	1.53999	5.4638e-06
PFLU_4684	1.53998	6.53115e-07
PFLU_0133	1.47886	8.70652e-07
PFLU_6123	1.0026	5.97302e-06
PFLU_1835	-1.43329	1.44654e-06
PFLU_6051	1.02544	3.32594e-06
PFLU_5707	0.807749	0.000103207
PFLU_4515	-0.605804	0.0479551
PFLU_1917	0.915907	0.0145014
PFLU_2276	-0.0413884	0.946041
PFLU_1145	1.10954	1.52593e-06
PFLU_0616	1.2646	0.000142885
PFLU_2886	1.31992	0.0587047
PFLU_3428	-1.42222	1.55435e-06
PFLU_3011	-1.53277	0.000826653
PFLU_4845	1.19461	4.19564e-06
PFLU_2337	-0.984296	0.000366559
PFLU_3780	0.835072	0.0212856
PFLU_4251	-1.13421	3.37244e-07
PFLU_0407	-1.11151	1.08723e-05
PFLU_3521	-0.83176	0.000278799
PFLU_3357	-1.52669	0.0131626
PFLU_4091	0.953699	0.0190978
PFLU_2453	1.00176	0.00738209
PFLU_1627	-1.20517	1.22654e-05
PFLU_4160	-1.26694	0.000143202
PFLU_1011	-1.52502	0.000550635
PFLU_0137	-1.01773	3.28453e-05
PFLU_4361	-0.826616	0.000274811
PFLU_5656	-1.19829	3.31075e-06
PFLU_2673	-1.01412	1.67108e-05
PFLU_2034	-1.07272	1.59026e-05
PFLU_3490	0.688394	0.011006
PFLU_6088	1.17678	0.00213926
PFLU_0055	-0.928591	1.80116e-05
PFLU_4003	-1.41211	0.00757214
PFLU_5262	1.14487	3.3273e-06
PFLU_3183	1.42479	0.000216052
PFLU_5311	-1.09632	7.94334e-05
PFLU_5888	-1.46554	0.00239751
PFLU_3203	-1.03581	1.50498e-05
PFLU_5853	0.563923	0.160748
PFLU_0861	1.06866	1.90952e-06
PFLU_0382	-1.02894	6.80124e-07
PFLU_1473	1.10458	0.000715851
PFLU_3888	-1.40122	9.49884e-08
PFLU_1848	-1.13665	6.4019e-07
PFLU_4080	0.274235	0.412583
PFLU_2935	-0.812274	8.04897e-05
PFLU_3148	-1.41802	4.88626e-05
PFLU_5685	0.923102	2.83294e-05
PFLU_1870	0.830429	0.00369659
PFLU_1269	1.07054	2.74684e-06
PFLU_3495	0.498267	0.523784
PFLU_3084	1.51023	1.89644e-05
PFLU_2525	1.50952	0.0741841
PFLU_6040	-1.05386	0.000268488
PFLU_1400	-1.00895	7.62236e-06
PFLU_0288	-1.01096	2.28747e-06
PFLU_5662	1.50758	3.6573e-05
PFLU_2913	1.50649	1.83567e-08
PFLU_4596	-0.485131	0.0155655
PFLU_4538	1.09225	8.0371e-06
PFLU_4182	-0.843591	4.4357e-06
PFLU_1367	1.50401	8.78733e-06
PFLU_3497	-0.161419	0.842101
PFLU_5711	1.06569	0.000189889
PFLU_4970	-1.5033	0.000424153
PFLU_6035	0.936777	0.0118081
PFLU_5402	1.26755	3.69516e-07
PFLU_3550	-0.78815	0.00145708
PFLU_2582	0.966962	0.00035064
PFLU_3861	1.21459	0.00298383
PFLU_0929	-0.718398	0.00101412
PFLU_5864	1.01421	0.000278084
PFLU_3267	1.0375	0.0160448
PFLU_0559	1.00039	0.00134983
PFLU_3774	0.643637	0.0217143
PFLU_4686	1.04154	1.19355e-05
PFLU_1449	1.49518	5.51975e-06
PFLU_3803	-0.264736	0.26773
PFLU_0279	1.49384	0.000204129
PFLU_3218	-1.49363	6.35584e-08
PFLU_4153	-1.0259	0.00335613
PFLU_5575	1.11825	1.81663e-06
PFLU_5160	1.0492	0.00280282
PFLU_0222	-0.555479	0.086287
PFLU_1475	1.07036	0.000123984
PFLU_0097	-0.814699	0.0097877
PFLU_4075	0.287412	0.716978
PFLU_0138	-0.577823	0.211397
PFLU_3477	-1.20368	1.88584e-06
PFLU_4563	-1.05699	2.66612e-06
PFLU_0819	-1.06816	1.78827e-06
PFLU_0095	-0.953361	0.00373762
PFLU_1371	-0.931375	2.79619e-05
PFLU_6074	0.818446	0.000194279
PFLU_2119	0.17018	0.576062
PFLU_3900	-1.14362	0.000166395
PFLU_1472	1.21664	3.16004e-08
PFLU_0205	0.936822	0.0245515
PFLU_5436	-0.693711	0.0185597
PFLU_6124	0.974585	3.71872e-05
PFLU_5419	1.01533	2.10322e-05
PFLU_4047	-0.844668	0.00247417
PFLU_2046	-1.48349	0.0130601
PFLU_6037	-0.781203	0.00027879
PFLU_5342	-0.471072	0.0157348
PFLU_2756	0.479827	0.0930452
PFLU_4043	-0.71427	0.00772901
PFLU_0700	1.19936	0.0311772
PFLU_3502	-1.03664	0.000447712
PFLU_1054	1.03029	7.17838e-05
PFLU_5357	-1.15574	0.0129328
PFLU_5404	0.869808	1.28475e-05
PFLU_5591	-1.15089	2.23584e-05
PFLU_1997	1.47869	9.60656e-07
PFLU_1295	1.47847	2.69391e-06
PFLU_5161	1.11267	0.000313929
PFLU_4308	-0.962141	4.09803e-05
PFLU_4008	-1.12794	8.56828e-05
PFLU_0502	1.074	5.51797e-07
PFLU_3538	0.40383	0.294822
PFLU_2892	-1.2575	4.22759e-07
PFLU_5088	-1.20666	1.2159e-06
PFLU_5785	-0.568378	0.000956545
PFLU_5648	1.47302	7.41945e-06
PFLU_3311	0.764215	0.000514473
PFLU_2693	-1.47043	1.57517e-07
PFLU_2109	-1.47023	1.39482e-06
PFLU_0888	1.09536	0.000688897
PFLU_4312	0.951772	4.74921e-06
PFLU_5195	1.46952	9.66033e-06
PFLU_2787	-1.46938	7.89927e-05
PFLU_1967	1.01771	0.00716474
PFLU_5461	1.08711	8.64018e-05
PFLU_2879	-0.86387	0.0698761
PFLU_3814	0.413123	0.312198
PFLU_5619	0.584407	0.001551
PFLU_2022	-1.00873	9.71352e-06
PFLU_0162	1.01259	0.000274811
PFLU_3398	1.0526	0.0781776
PFLU_0165	1.46534	7.74162e-05
PFLU_2659	-0.738052	0.00117025
PFLU_0136	-1.04345	6.00934e-05
PFLU_0463	1.11084	0.000214037
PFLU_5854	0.539742	0.0572637
PFLU_4763	1.46157	3.20003e-07
PFLU_1195	-0.938895	8.01038e-07
PFLU_1655	0.706214	0.00346901
PFLU_3470	-0.933088	0.000115355
PFLU_4077	0.683347	0.225881
PFLU_3541	-1.45924	9.02768e-06
PFLU_3882	1.05523	5.00233e-05
PFLU_2353	1.45854	2.84489e-07
PFLU_2289	1.45821	3.18049e-06
PFLU_2277	-0.745006	0.00620066
PFLU_1528	1.45642	4.31661e-07
PFLU_3966	-1.26101	2.87819e-06
PFLU_5142	-1.19343	0.0138192
PFLU_0106	1.39815	7.87469e-06
PFLU_0300	-0.653477	0.00565884
PFLU_2397	1.14308	7.23474e-05
PFLU_3185	1.22552	7.42922e-05
PFLU_0739	0.962516	6.99233e-06
PFLU_4838	-1.2547	1.35557e-06
PFLU_5337	0.856562	0.00114675
PFLU_0448	1.1803	0.000192207
PFLU_1451	-0.998403	0.000179252
PFLU_3893	-1.20259	2.48741e-06
PFLU_0783	-1.18921	5.57732e-07
PFLU_5492	1.26298	2.50686e-05
PFLU_4032	0.749564	0.0477897
PFLU_0337	0.820429	0.000283144
PFLU_5663	1.44651	5.31049e-05
PFLU_0798	1.01166	0.000190174
PFLU_2105	-0.941208	0.00021665
PFLU_0953	-1.44479	2.49006e-06
PFLU_2822	0.544442	0.302682
PFLU_3720	0.145831	0.722548
PFLU_3071	1.44318	2.72746e-05
PFLU_3921	0.950379	1.51874e-06
PFLU_5384	1.02669	0.00121988
PFLU_3563	-0.964021	0.000323235
PFLU_1099	-1.02607	0.000397485
PFLU_5348	0.731333	0.0197478
PFLU_4667	-0.796972	0.00354073
PFLU_5930	-1.0719	3.08365e-06
PFLU_3939	1.43956	8.64897e-06
PFLU_4331	1.42972	4.19962e-06
PFLU_0617	-1.43753	5.76075e-06
PFLU_3934	-0.841651	0.050399
PFLU_2844	0.93289	0.000107021
PFLU_1219	-0.988006	7.56816e-07
PFLU_0472	1.28648	0.00179527
PFLU_1118	-0.998859	3.85378e-06
PFLU_1921	0.0647498	0.909598
PFLU_4125	-0.709469	0.0132218
PFLU_2280	-1.22068	3.21181e-05
PFLU_6073	1.1138	2.98609e-06
PFLU_0013	1.09701	3.62057e-05
PFLU_4837	-0.944138	0.000381846
PFLU_3378	-1.37499	2.38173e-07
PFLU_1424	1.38164	4.99584e-07
PFLU_1805	0.799626	0.000766409
PFLU_3698	-1.43036	0.000162703
PFLU_3403	-1.33302	8.10556e-07
PFLU_1880	-0.491788	0.0157564
PFLU_3128	-1.11146	0.00240885
PFLU_4204	1.39575	7.84501e-08
PFLU_0412	0.894262	5.32518e-06
PFLU_2145	0.947152	6.51388e-05
PFLU_0018	1.03324	1.04215e-06
PFLU_5721	1.04347	5.78243e-05
PFLU_1338	-0.815149	0.00338839
PFLU_5116	1.4253	0.000221074
PFLU_1447	1.42528	1.64332e-06
PFLU_0270	-0.974063	2.80649e-07
PFLU_2018	-1.42505	0.0474233
PFLU_1329	0.80473	0.00131915
[truncated: 1,035 more rows]

## Sheet: C
Geneid	che.ti.1dpi.logFC	che.ti.1dpi.FDR
PFLU_3092	3.27136	4.24793e-08
PFLU_3089	2.92419	5.38923e-08
PFLU_3091	4.21051	1.32054e-07
PFLU_3090	3.77626	6.79159e-07
PFLU_3096	1.88018	6.79159e-07
PFLU_3097	1.90679	1.80049e-06
PFLU_4463	-3.21188	2.2427e-06
PFLU_3098	1.83513	2.2427e-06
PFLU_3094	1.20514	0.000199827
PFLU_5364	0.755802	0.00570102
PFLU_6119	-0.636446	0.00946649
PFLU_4036	-1.21577	0.010723
PFLU_6121	-0.707977	0.0129174
PFLU_6120	-0.70827	0.0345948
PFLU_6025	-0.854328	0.0346286
PFLU_2128	0.778646	0.0346286
PFLU_3163	0.897367	0.0371893
PFLU_5535	-0.591768	0.041025
PFLU_3529	-1.20754	0.041025
PFLU_1999	0.636478	0.041025
PFLU_6118	-0.614764	0.041025
PFLU_1043	-3.6272	0.0427324
PFLU_2454	-1.31747	0.0427324
PFLU_3093	0.976953	0.0427324
PFLU_2802	0.997828	0.0429736
PFLU_5673	0.783274	0.0429736
PFLU_1279	-0.544433	0.0429736
PFLU_3939	0.911806	0.04545
PFLU_4049	-0.815462	0.0464599
PFLU_3735	1.03862	0.0473992
PFLU_1655	-0.754135	0.0473992
PFLU_5891	0.5698	0.0498925
PFLU_6122	-0.552381	0.0498925
PFLU_5519	-0.638778	0.0607866
PFLU_5858	0.963057	0.0671538
PFLU_5538	-0.484366	0.0671538
PFLU_1995	0.752929	0.0671538
PFLU_5520	-0.546015	0.0671538
PFLU_3533	-1.35797	0.0671538
PFLU_1283	-0.809152	0.0671538
PFLU_5096	-0.617098	0.067343
PFLU_6041	-0.839178	0.067343
PFLU_3165	0.574217	0.067343
PFLU_1998	0.594478	0.067343
PFLU_0642	-0.63604	0.0715833
PFLU_3194	-1.07538	0.0715833
PFLU_2452	-1.2652	0.0731582
PFLU_0651	-0.685763	0.0743606
PFLU_4995	-0.731729	0.0743606
PFLU_0731	-0.632128	0.0743606
PFLU_3753	0.746138	0.0743606
PFLU_2333	1.27181	0.0743606
PFLU_3200	-1.02167	0.0746322
PFLU_3535	-0.651496	0.0746322
PFLU_2808	0.717631	0.0750859
PFLU_0703	-0.884195	0.0750859
PFLU_5249	-0.58349	0.0750859
PFLU_1433	0.647207	0.0750859
PFLU_0288	-0.502867	0.0750859
PFLU_1997	0.675491	0.0750859
PFLU_3538	-1.07036	0.0750859
PFLU_6123	-0.535405	0.0752702
PFLU_2533	0.559487	0.0752702
PFLU_4444	0.820428	0.0761736
PFLU_3902	-0.686787	0.0761736
PFLU_3903	-1.02231	0.0761736
PFLU_0647	-0.597505	0.0761736
PFLU_5252	-0.584039	0.0761736
PFLU_5724	-0.45045	0.0761736
PFLU_1278	-0.533634	0.0761736
PFLU_4937	0.661059	0.0761736
PFLU_4359	0.5424	0.0775766
PFLU_6117	-0.518619	0.0799524
PFLU_6065	0.831309	0.0799524
PFLU_4819	-0.595188	0.0800149
PFLU_2080	-0.581134	0.080635
PFLU_5386	0.563601	0.0809782
PFLU_4445	0.844682	0.0813883
PFLU_0697	-0.894724	0.0813883
PFLU_6024	-0.883291	0.0813883
PFLU_3193	-0.762628	0.0813883
PFLU_6006	-0.551032	0.0823812
PFLU_2053	0.69421	0.0823812
PFLU_6021	-0.657216	0.0823812
PFLU_2792	0.921804	0.0828449
PFLU_3071	0.744985	0.0828449
PFLU_0549	0.572139	0.0828449
PFLU_3716	0.719784	0.0828449
PFLU_2918	-0.837104	0.0834528
PFLU_6022	-1.01673	0.0834528
PFLU_0657	0.69647	0.0834528
PFLU_3583	0.860491	0.0834528
PFLU_5521	-0.543836	0.0834528
PFLU_5534	-0.459175	0.083526
PFLU_4872	-0.914531	0.0846744
PFLU_2136	-0.572734	0.0862377
PFLU_0330	-0.485776	0.0914252
PFLU_5055	-0.478488	0.0914252
PFLU_0186	0.730813	0.0918224
PFLU_2323	0.930671	0.0924523
PFLU_0611	-0.567475	0.0924523
PFLU_4736	0.603667	0.0926487
PFLU_3106	0.946498	0.0934348
PFLU_5091	-1.01103	0.0934348
PFLU_4409	0.492248	0.0934348
PFLU_0646	-0.655812	0.0934348
PFLU_3662	-0.73042	0.0934348
PFLU_0680	-0.521954	0.0934348
PFLU_3195	-1.06924	0.0934348
PFLU_3393	-0.708752	0.0934348
PFLU_1823	-0.513783	0.0934348
PFLU_3196	-1.01237	0.0934348
PFLU_0898	-0.428583	0.0934348
PFLU_3213	0.847325	0.0934348
PFLU_5504	-0.458094	0.0946629
PFLU_3677	-0.745638	0.0975429
PFLU_1646	-0.488309	0.0977931
PFLU_0187	0.581143	0.0982758
PFLU_3527	-1.07528	0.0982758
PFLU_0308	-0.611661	0.098838
PFLU_2803	0.645099	0.0991114
PFLU_4701	-0.471036	0.0991114
PFLU_1052	-0.463366	0.0991114
PFLU_5411	-0.489977	0.0999568
PFLU_4456	0.658551	0.100451
PFLU_3516	0.62387	0.100451
PFLU_2321	0.842097	0.100451
PFLU_0213	0.564988	0.100451
PFLU_1824	-0.509352	0.100451
PFLU_1145	-0.42583	0.100451
PFLU_1425	0.509156	0.100451
PFLU_3528	-0.909302	0.100451
PFLU_5531	-0.434306	0.101156
PFLU_1062	-1.12497	0.101156
PFLU_1822	-0.515219	0.106583
PFLU_6134	-0.511678	0.10694
PFLU_3942	0.532855	0.107323
PFLU_2317	0.7551	0.107323
PFLU_5859	0.648278	0.107323
PFLU_0648	-0.527969	0.107323
PFLU_2077	-0.577848	0.107323
PFLU_5526	-0.610997	0.107323
PFLU_4556	-2.12539	0.107323
PFLU_6015	-0.765129	0.107323
PFLU_3198	-1.09761	0.107323
PFLU_1851	-0.617197	0.107323
PFLU_3647	1.02001	0.107323
PFLU_2849	0.363221	0.107323
PFLU_5138	-0.863083	0.108738
PFLU_1996	0.674618	0.109087
PFLU_2308	1.05901	0.109589
PFLU_5536	-0.47356	0.109589
PFLU_0315	0.725088	0.109589
PFLU_5525	-0.54974	0.109954
PFLU_4643	0.602979	0.109954
PFLU_0405	-0.495374	0.109954
PFLU_5253	-0.386651	0.109954
PFLU_0467	-0.729957	0.109954
PFLU_1720	0.60586	0.109954
PFLU_0222	0.936645	0.109954
PFLU_6124	-0.509679	0.109954
PFLU_5720	-0.467133	0.109954
PFLU_0534	-0.478366	0.112096
PFLU_3623	-0.585433	0.112096
PFLU_4327	-0.505784	0.112096
PFLU_1578	-0.41291	0.113046
PFLU_5410	-0.50236	0.113738
PFLU_5537	-0.423172	0.113861
PFLU_5900	-0.561006	0.114051
PFLU_3661	-0.796292	0.114051
PFLU_2277	0.713196	0.114051
PFLU_3526	-0.886147	0.114051
PFLU_4721	-1.54538	0.11418
PFLU_5522	-0.517575	0.11418
PFLU_1643	-0.460719	0.11418
PFLU_5069	0.48986	0.11418
PFLU_3891	0.407416	0.11418
PFLU_4295	0.543754	0.116692
PFLU_0400	-0.739107	0.116692
PFLU_5077	-0.432779	0.116692
PFLU_5033	-0.48767	0.116977
PFLU_2054	0.671898	0.117366
PFLU_2058	1.09757	0.117366
PFLU_0675	0.645537	0.117366
PFLU_1478	-0.449759	0.117366
PFLU_6010	-0.411652	0.117366
PFLU_0650	-0.706799	0.117624
PFLU_5139	-0.990047	0.117624
PFLU_5678	0.564264	0.117656
PFLU_3264	0.587779	0.117788
PFLU_4662	0.521609	0.117788
PFLU_4731	0.467893	0.11921
PFLU_0590	-0.940508	0.11921
PFLU_5424	-0.566398	0.11921
PFLU_0476	-0.504489	0.119569
PFLU_3436	0.684437	0.119569
PFLU_4907	-0.42798	0.119569
PFLU_3201	-0.708681	0.122049
PFLU_2154	0.605789	0.122581
PFLU_2324	0.925141	0.122581
PFLU_5014	-0.429058	0.122581
PFLU_3199	-1.03066	0.122581
PFLU_5067	0.477322	0.122581
PFLU_0339	-0.643631	0.124292
PFLU_1647	-0.366693	0.124292
PFLU_2855	0.385091	0.124607
PFLU_0894	-0.433447	0.124729
PFLU_5419	-0.468756	0.124729
PFLU_3095	0.457034	0.124729
PFLU_3761	-0.381051	0.124729
PFLU_1219	-0.353462	0.126043
PFLU_5523	-0.665299	0.126115
PFLU_3901	-0.424786	0.126115
PFLU_0612	-0.58059	0.126115
PFLU_3041	-0.405393	0.126115
PFLU_0010	-0.446171	0.126115
PFLU_1818	-0.525816	0.126115
PFLU_2332	0.903491	0.126115
PFLU_3925	-0.414686	0.126115
PFLU_1726	-0.61281	0.126115
PFLU_3534	-0.7167	0.126115
PFLU_2530	0.671171	0.12888
PFLU_0481	-0.410113	0.129469
PFLU_4554	-3.83986	0.129712
PFLU_3247	-0.767859	0.130034
PFLU_4892	-1.01257	0.130955
PFLU_4971	0.650147	0.131933
PFLU_4989	0.440981	0.131933
PFLU_5137	-0.780311	0.131933
PFLU_1468	0.717798	0.131933
PFLU_3039	-0.479189	0.131933
PFLU_5639	-1.25379	0.134191
PFLU_4116	0.470172	0.134191
PFLU_5547	0.605229	0.134191
PFLU_1415	-0.593489	0.134191
PFLU_3484	-0.57069	0.134191
PFLU_5530	-0.425035	0.134336
PFLU_3872	-0.36795	0.134336
PFLU_4205	0.482917	0.134522
PFLU_1694	0.754439	0.134522
PFLU_3160	0.469809	0.134847
PFLU_2078	-0.582768	0.136015
PFLU_1166	0.561346	0.136836
PFLU_2320	0.886829	0.137097
PFLU_5611	0.38798	0.137097
PFLU_2336	0.862032	0.137097
PFLU_4625	-0.806306	0.137196
PFLU_6019	-0.704365	0.137196
PFLU_2276	1.49404	0.137196
PFLU_2125	0.614712	0.137337
PFLU_5524	-0.57187	0.137337
PFLU_5017	-0.387474	0.137337
PFLU_0289	-0.558386	0.137337
PFLU_0364	0.482651	0.13859
PFLU_0702	-0.901038	0.138737
PFLU_2916	0.665574	0.138737
PFLU_3079	0.569197	0.138737
PFLU_6026	-0.442084	0.138737
PFLU_3087	0.675678	0.138737
PFLU_4578	-0.371467	0.138737
PFLU_6013	-0.465487	0.138737
PFLU_1967	0.767596	0.138737
PFLU_0350	-0.380684	0.138737
PFLU_3143	-0.971985	0.138737
PFLU_0009	-0.477544	0.138737
PFLU_2290	0.35484	0.139656
PFLU_5010	-0.425637	0.139675
PFLU_0704	-0.645243	0.139675
PFLU_3353	0.40281	0.139675
PFLU_1439	0.774174	0.14148
PFLU_2617	0.494039	0.14148
PFLU_2220	0.472084	0.14148
PFLU_0776	-0.499738	0.14148
PFLU_0770	-0.450734	0.142003
PFLU_4360	0.473576	0.142003
PFLU_0294	0.665988	0.142665
PFLU_1432	0.447245	0.142665
PFLU_0768	-0.4237	0.142665
PFLU_5323	-0.469921	0.142665
PFLU_2873	0.552076	0.142665
PFLU_4262	0.416644	0.142665
PFLU_0645	-0.5517	0.144508
PFLU_5075	-0.472529	0.144508
PFLU_0850	0.670515	0.144972
PFLU_2153	0.573876	0.145451
PFLU_4891	-1.48983	0.145451
PFLU_4515	0.750758	0.145451
PFLU_3239	-1.38522	0.145451
PFLU_3644	0.43472	0.145451
PFLU_4714	-0.515189	0.145774
PFLU_2082	-0.532086	0.145774
PFLU_3904	-0.49764	0.146314
PFLU_6061	0.427183	0.146351
PFLU_2615	-1.00357	0.146395
PFLU_0699	-0.894334	0.147077
PFLU_5505	-0.365764	0.147077
PFLU_3693	0.545472	0.147077
PFLU_4204	0.372345	0.147077
PFLU_5061	-0.410326	0.147077
PFLU_6080	-0.784237	0.147077
PFLU_2329	0.644756	0.147935
PFLU_3354	0.599907	0.148009
PFLU_2319	0.749338	0.148009
PFLU_2081	-0.511649	0.148009
PFLU_3584	0.719707	0.148009
PFLU_3582	0.646853	0.148009
PFLU_4458	0.655824	0.148009
PFLU_5866	0.821979	0.148009
PFLU_0482	-0.392442	0.148009
PFLU_4038	-0.483837	0.148009
PFLU_3086	0.578132	0.148009
PFLU_4748	-0.455384	0.148009
PFLU_4261	0.69453	0.148009
PFLU_0180	0.443733	0.148009
PFLU_3197	-0.980294	0.148009
PFLU_4769	-0.854343	0.148009
PFLU_5314	0.429287	0.148009
PFLU_3946	-0.554765	0.148009
PFLU_6066	0.735906	0.148009
PFLU_0344	0.416319	0.148009
PFLU_5342	-0.455678	0.148009
PFLU_3185	0.558994	0.148009
PFLU_2799	0.470031	0.148009
PFLU_3624	-0.584026	0.148009
PFLU_5203	0.443903	0.148009
PFLU_2334	1.07709	0.148009
PFLU_4910	-0.404294	0.148009
PFLU_1294	0.491828	0.148009
PFLU_3890	0.393547	0.148009
PFLU_1177	-1.00796	0.148009
PFLU_0202	0.731042	0.14812
PFLU_2075	-0.519636	0.148124
PFLU_3034	0.444312	0.148332
PFLU_5423	-0.496047	0.148332
PFLU_2316	0.6317	0.148785
PFLU_2950	-0.638154	0.151447
PFLU_2531	0.724887	0.152202
PFLU_5997	-0.3448	0.152409
PFLU_0573	-0.369426	0.152978
PFLU_2040	0.584758	0.153115
PFLU_4282	-1.39901	0.153124
PFLU_5510	-0.440084	0.15314
PFLU_2014	0.37306	0.15413
PFLU_5518	-0.46586	0.15433
PFLU_4626	-0.776697	0.15433
PFLU_4647	-0.39107	0.15433
PFLU_4166	0.439641	0.15433
PFLU_3796	-0.337162	0.15433
PFLU_5823	-0.555473	0.15458
PFLU_3709	0.438267	0.15458
PFLU_1354	-0.471239	0.15458
PFLU_2335	0.782321	0.15458
PFLU_2751	-0.374084	0.15458
PFLU_2318	0.918349	0.155695
PFLU_3265	0.545311	0.156041
PFLU_5652	0.448088	0.156041
PFLU_1128	-1.3256	0.156264
PFLU_5092	-0.581157	0.156264
PFLU_1363	0.52525	0.156264
PFLU_4623	-0.680318	0.156264
PFLU_5173	-0.391614	0.156264
PFLU_4499	-0.454835	0.156264
PFLU_0926	-0.47996	0.156264
PFLU_1817	-0.461652	0.156264
PFLU_4624	-0.785819	0.156264
PFLU_1311	0.464616	0.156264
PFLU_2699	0.557358	0.156264
PFLU_3830	-0.366918	0.156264
PFLU_0353	-0.372891	0.156264
PFLU_1550	-0.427904	0.156264
PFLU_5043	-0.315513	0.156299
PFLU_5575	-0.374974	0.156619
PFLU_1295	0.507661	0.156947
PFLU_2749	-0.467617	0.156947
PFLU_0340	-0.551219	0.1574
PFLU_1843	0.412046	0.1574
PFLU_4408	0.443362	0.158032
PFLU_2127	0.620935	0.158032
PFLU_0754	0.466804	0.158199
PFLU_5644	-0.478526	0.1595
PFLU_0533	-0.439309	0.159726
PFLU_4420	0.434728	0.159726
PFLU_5034	-0.405254	0.159726
PFLU_2987	0.682085	0.159726
PFLU_2133	0.766814	0.159726
PFLU_3981	0.689289	0.159726
PFLU_1161	-0.386219	0.159726
PFLU_5777	0.494224	0.159726
PFLU_1018	0.349628	0.159726
PFLU_2337	0.54791	0.159726
PFLU_5815	-0.426436	0.159726
PFLU_2683	0.701105	0.159726
PFLU_0491	-0.347994	0.159726
PFLU_2264	0.54827	0.160496
PFLU_5502	-0.357192	0.160496
PFLU_0267	-0.428933	0.160496
PFLU_2079	-0.364645	0.16295
PFLU_1816	-0.357408	0.16295
PFLU_5707	-0.383183	0.16295
PFLU_1150	0.482869	0.163363
PFLU_1221	-0.358996	0.164444
PFLU_2322	0.455583	0.164698
PFLU_1139	-0.357003	0.165973
PFLU_0863	-0.399417	0.165973
PFLU_3391	-0.485908	0.165973
PFLU_3774	-0.55112	0.165973
PFLU_4247	0.663312	0.166234
PFLU_5073	0.477889	0.166341
PFLU_1012	-1.57731	0.166341
PFLU_0165	0.639125	0.166341
PFLU_5483	-2.64381	0.167129
PFLU_4737	0.367438	0.167129
PFLU_4933	-0.328605	0.167129
PFLU_5420	-0.351564	0.167129
PFLU_3908	-0.497532	0.167129
PFLU_0566	0.438776	0.16715
PFLU_5503	-0.41338	0.16715
PFLU_5527	-0.511326	0.167298
PFLU_6023	-0.781964	0.167298
PFLU_3642	-0.893568	0.167298
PFLU_2187	0.568169	0.167337
PFLU_2219	0.486208	0.168258
PFLU_0634	0.497298	0.168258
PFLU_5171	-0.370245	0.168504
PFLU_1654	-0.562515	0.168504
PFLU_5766	-0.469957	0.168504
PFLU_4667	0.565006	0.168504
PFLU_5576	-0.325491	0.168504
PFLU_5239	-0.376623	0.168504
PFLU_0098	-0.473801	0.169232
PFLU_1302A	-0.425793	0.169703
PFLU_1111	-0.469188	0.169703
PFLU_0441	0.408998	0.170141
PFLU_4039	-0.628461	0.170141
PFLU_1135	-0.409291	0.170196
PFLU_1467	0.654235	0.17034
PFLU_1314	-0.381517	0.17034
PFLU_5093	-0.495577	0.170571
PFLU_0162	-0.452777	0.171058
PFLU_3814	-0.812749	0.17169
PFLU_3144	-0.637122	0.17169
PFLU_4294	0.344819	0.171872
PFLU_0798	-0.433651	0.171872
PFLU_3873	-0.333359	0.17237
PFLU_2325	0.808282	0.172751
PFLU_4419	0.42335	0.173168
PFLU_2390	0.408261	0.173415
PFLU_3562	0.509639	0.174058
PFLU_4660	0.386419	0.174567
PFLU_4277	0.321097	0.174575
PFLU_0575	0.356787	0.174575
PFLU_2030	0.444347	0.174575
PFLU_0255	0.623114	0.174575
PFLU_2150	0.453658	0.174575
PFLU_2525	1.48952	0.174575
PFLU_2313	0.623596	0.174575
PFLU_1563	-0.341212	0.174575
PFLU_5619	-0.332715	0.174809
PFLU_1565	-0.394428	0.175897
PFLU_5669	0.472578	0.175994
PFLU_1048	-0.777242	0.175994
PFLU_4766	0.649502	0.176357
PFLU_1664	0.392174	0.176357
PFLU_0401	-0.422636	0.176357
PFLU_3752	0.591525	0.176562
PFLU_5896	-0.619316	0.176562
PFLU_4089	-0.659299	0.176562
PFLU_2621	0.471137	0.177449
PFLU_1364	0.542211	0.177614
PFLU_1271	-0.34282	0.177614
PFLU_4730	0.407506	0.17793
PFLU_5795	-0.434754	0.17793
PFLU_0465	-0.497383	0.17793
PFLU_4627	-0.786326	0.17793
PFLU_1704	-0.33606	0.17793
PFLU_1506	0.402066	0.179522
PFLU_1644	-0.331017	0.179522
PFLU_4569	0.617121	0.180411
PFLU_0541	0.483465	0.180411
PFLU_0011	-0.396871	0.180411
PFLU_0475	-0.329061	0.180411
PFLU_5705	-0.343346	0.180411
PFLU_4911	-0.349995	0.180411
PFLU_1761	-1.17831	0.180516
PFLU_0953	-0.459481	0.180567
PFLU_0535	-0.367027	0.180644
PFLU_4555	-3.13535	0.180715
PFLU_5220	-0.395702	0.181096
PFLU_0328	-0.45616	0.181096
PFLU_2180	0.443633	0.181096
PFLU_2043	-0.839725	0.181096
PFLU_0658	0.578255	0.181321
PFLU_6012	-0.742553	0.181412
PFLU_5806	0.551754	0.181656
PFLU_4286	0.511637	0.181656
PFLU_6020	-0.576346	0.182305
PFLU_1682	0.748246	0.182305
PFLU_3813	-0.40426	0.182305
PFLU_2070	0.427065	0.182305
PFLU_3930	-0.344199	0.182305
PFLU_3843	-0.614991	0.182305
PFLU_6014	-0.547261	0.182626
PFLU_1226	-0.390632	0.182696
PFLU_4502	-0.922224	0.183509
PFLU_1358	-2.06484	0.183509
PFLU_3970	0.640249	0.183509
PFLU_5218	-0.315321	0.183509
PFLU_0338	-0.430324	0.183509
PFLU_1653	-0.55047	0.183509
PFLU_5555	-0.526811	0.183509
PFLU_5780	-0.312361	0.183509
PFLU_1291	-0.357745	0.183509
PFLU_1519	-0.394309	0.183509
PFLU_0003	-0.370476	0.183509
PFLU_5888	-0.901219	0.183509
PFLU_3541	-0.509683	0.183509
PFLU_3351	0.300496	0.183509
PFLU_5471	-0.28545	0.183509
PFLU_0889	-0.360731	0.183509
PFLU_4852	0.372522	0.183509
PFLU_1037	0.57238	0.183509
PFLU_0399	0.322507	0.184089
PFLU_6085	-0.456018	0.184089
PFLU_2175	0.471527	0.184255
PFLU_0899	-0.319979	0.185035
PFLU_2076	-0.454534	0.185333
PFLU_5094	-0.83671	0.18551
PFLU_4806	-0.483913	0.18551
PFLU_5223	-0.332565	0.185665
PFLU_4440	0.52133	0.185823
PFLU_3630	0.399457	0.185951
PFLU_6073	-0.319049	0.185951
PFLU_6067	0.512231	0.186807
PFLU_4553	-1.6097	0.186807
PFLU_5202	0.360309	0.186807
PFLU_4209	-0.312545	0.186807
PFLU_5501	-0.306713	0.186892
PFLU_3941	0.355121	0.18747
PFLU_1940	0.672342	0.18791
PFLU_4425	-0.420662	0.18808
PFLU_5247	-0.319063	0.188206
PFLU_5829	-0.374541	0.188657
PFLU_5356	0.422741	0.188852
PFLU_0849	0.644373	0.189065
PFLU_4274	0.860324	0.189757
PFLU_0637	-0.298508	0.189793
PFLU_2055	0.557491	0.191096
PFLU_0437	0.332836	0.191354
PFLU_1127	-0.854106	0.191365
PFLU_3803	0.494523	0.191722
PFLU_4890	-0.916672	0.192067
PFLU_2731	0.537828	0.192472
PFLU_0698	-0.795792	0.192967
PFLU_2296	0.493852	0.193254
PFLU_0916	0.509211	0.193254
PFLU_3390	-0.4698	0.193254
PFLU_2991A	0.279009	0.193254
PFLU_1793	0.427803	0.193254
PFLU_5721	-0.382175	0.194832
PFLU_3699	0.741695	0.194832
PFLU_2159	0.368336	0.194956
PFLU_4257	0.367936	0.195064
PFLU_0740	-0.422296	0.195653
PFLU_1741	0.61704	0.196534
PFLU_0652	-1.78352	0.196897
PFLU_4363	0.285456	0.196897
PFLU_2767	0.380903	0.196897
PFLU_0893	-0.375652	0.197125
PFLU_5846	0.426481	0.197125
PFLU_0861	-0.304772	0.197125
PFLU_5848	0.525769	0.197125
PFLU_2395	-0.485387	0.197125
PFLU_1296	0.499481	0.197125
PFLU_0782	0.369761	0.19754
PFLU_6127	-0.345155	0.19754
PFLU_1090	0.440497	0.197823
PFLU_5330	-0.407433	0.197931
PFLU_3765A	-0.354685	0.198667
PFLU_6035	-0.566465	0.199898
PFLU_5232	-0.355021	0.201027
PFLU_0362	0.406343	0.204174
PFLU_5509	-0.470047	0.204174
PFLU_2529	0.59286	0.204174
PFLU_4614	-0.351734	0.204174
PFLU_5140	-0.861111	0.204174
PFLU_0219	0.688949	0.204174
PFLU_3809	-0.469209	0.204174
PFLU_3824	-0.290345	0.204174
PFLU_1508	0.718472	0.204174
PFLU_0095	-0.577842	0.204812
PFLU_3940	0.397597	0.20517
PFLU_5009	-0.357	0.206311
PFLU_1042	-1.1747	0.207654
PFLU_3943	0.45023	0.207953
PFLU_0910	-0.584276	0.208489
PFLU_5225	0.338899	0.208489
PFLU_0085	-0.329456	0.208489
PFLU_2654	-0.63393	0.208489
PFLU_2027	-0.349858	0.20911
PFLU_4749	0.286879	0.20911
PFLU_3638	0.359989	0.20911
PFLU_5090	-0.595472	0.209784
PFLU_1348	-0.437406	0.209784
PFLU_5712	-0.290722	0.209784
PFLU_2007	0.359117	0.209784
PFLU_5481	-0.385087	0.212587
PFLU_0143	-0.332341	0.212891
PFLU_0033	-0.448305	0.213251
PFLU_3388	0.449208	0.213599
PFLU_2587	0.457251	0.213599
PFLU_4898	0.259775	0.213599
PFLU_4477	-0.28157	0.213599
PFLU_1475	-0.403371	0.213924
PFLU_4788	-0.525879	0.214439
PFLU_3841	0.503424	0.214688
PFLU_3673	-0.390303	0.215983
PFLU_1107	-0.315895	0.216306
PFLU_5529	-0.334112	0.216614
PFLU_5622	0.33641	0.216614
PFLU_2225	0.333997	0.216615
PFLU_3798	-0.409682	0.217367
PFLU_3414	-0.412975	0.217367
PFLU_2330	0.822754	0.217367
PFLU_3128	-0.637301	0.217367
PFLU_2738	0.733638	0.218779
PFLU_0365	0.304131	0.219718
PFLU_1247	0.464196	0.220283
PFLU_2244	0.518687	0.220283
PFLU_5461	-0.381236	0.220283
PFLU_5533	-0.306328	0.220366
PFLU_1469	0.441901	0.220366
PFLU_0660	0.82944	0.220639
PFLU_1083	0.647184	0.220639
PFLU_1412	-2.57403	0.220639
PFLU_3192	-0.450621	0.220639
PFLU_6016	-0.492384	0.220639
PFLU_2698	0.705244	0.220639
PFLU_1601	-0.34002	0.221527
PFLU_6074	-0.31297	0.221728
PFLU_2616	-0.255112	0.22234
PFLU_4746	0.459842	0.22234
PFLU_3676	-0.484561	0.22234
PFLU_2188	0.532509	0.22234
PFLU_5577	-0.401304	0.224075
PFLU_5508	-0.371727	0.224439
PFLU_4305	-1.02781	0.2253
PFLU_4845	-0.338148	0.2253
PFLU_3852	0.555535	0.225471
PFLU_6087	-0.389334	0.225471
PFLU_2700	0.550496	0.226476
PFLU_4661	0.41824	0.226513
PFLU_2816	-0.39328	0.226661
PFLU_0559	-0.459338	0.227441
PFLU_1732A	0.350808	0.227943
PFLU_1066	-0.531593	0.228063
PFLU_5392	0.331162	0.228644
PFLU_4461	0.34913	0.229602
PFLU_5864	-0.40661	0.229602
PFLU_0268	0.566348	0.229602
PFLU_4842	-0.462043	0.229602
PFLU_4441	0.385227	0.230594
PFLU_5115	0.449687	0.230594
PFLU_6027	-0.672965	0.230594
PFLU_4125	0.516701	0.230594
PFLU_0290	-0.251659	0.230594
PFLU_5499	0.416323	0.232669
PFLU_4052	-0.419323	0.232958
PFLU_6091	-0.367885	0.234418
PFLU_3342A	0.406367	0.234442
PFLU_3736	0.454702	0.234936
PFLU_5315	0.300019	0.234936
PFLU_5065	0.271028	0.234936
PFLU_5480	-0.385186	0.235277
PFLU_0676	0.483625	0.235998
PFLU_2198	0.310011	0.235998
PFLU_1683	0.602344	0.237
PFLU_5637	-0.387234	0.237
PFLU_5470	-0.244555	0.237149
PFLU_1472	-0.229206	0.238866
PFLU_2152	0.457536	0.239207
PFLU_4959	0.376935	0.239207
PFLU_2110	0.35884	0.239207
PFLU_2721	-0.701764	0.239229
PFLU_5528	-0.459033	0.23937
PFLU_2353	0.320702	0.23937
PFLU_2619	0.401525	0.23937
PFLU_1849	-0.297728	0.23937
PFLU_1298	-0.334328	0.23937
PFLU_3047	0.432514	0.239386
PFLU_0458	0.271439	0.239386
PFLU_2898	0.591557	0.239386
PFLU_1353	0.351106	0.239643
PFLU_1156	-0.296377	0.239643
PFLU_3551	0.34658	0.240437
PFLU_6017	-0.331483	0.240437
PFLU_1847	-0.283905	0.240437
PFLU_3828	-0.286263	0.240437
PFLU_6110	-0.309742	0.240727
PFLU_5532	-0.314793	0.240945
PFLU_0004	-0.30986	0.241008
PFLU_0751	0.341872	0.241117
PFLU_5813	0.77548	0.241117
PFLU_2951	0.446125	0.241619
PFLU_5593	-0.297886	0.241619
PFLU_3374	-0.439561	0.241619
PFLU_2331	0.574779	0.241619
PFLU_0172	-0.52473	0.241619
PFLU_6135	-0.324301	0.242141
PFLU_1525	0.311991	0.242141
PFLU_4047	-0.463587	0.24247
PFLU_2248	0.266185	0.242676
PFLU_0456	-0.292146	0.242678
PFLU_1528	0.310081	0.243439
PFLU_5691	-0.356413	0.244829
PFLU_0163	-0.464174	0.24582
PFLU_4862	0.318668	0.246051
PFLU_1636	-0.405721	0.246051
PFLU_1645	-0.342182	0.246051
PFLU_3787	0.410993	0.246238
PFLU_0841	-0.266112	0.246656
PFLU_3672	-0.554558	0.246656
PFLU_5674	0.508248	0.246778
PFLU_6128	-0.324535	0.247089
PFLU_0151	-1.10279	0.24747
PFLU_5078	-0.445958	0.247788
PFLU_4551	0.410726	0.248053
PFLU_2151	0.409316	0.248053
PFLU_0562	0.447943	0.248291
PFLU_5776	-0.393881	0.248291
PFLU_1752	0.431327	0.248291
PFLU_2368	-0.484246	0.24864
PFLU_2618	0.434883	0.24864
PFLU_5648	0.422994	0.24864
PFLU_1914	-0.256256	0.249949
PFLU_2915	0.281259	0.249949
PFLU_5134	-0.48629	0.249949
PFLU_5189	0.342884	0.249949
PFLU_2696	-0.355029	0.250253
PFLU_4645	0.336564	0.250253
PFLU_1413	-0.760835	0.250253
PFLU_5147	-0.743137	0.250253
PFLU_0041	0.281649	0.250253
PFLU_2748	-0.24668	0.250253
PFLU_1610	0.50839	0.250253
PFLU_5872	-0.285423	0.251562
PFLU_0227	0.547781	0.251562
PFLU_1505	0.328297	0.251562
PFLU_3797	-0.267632	0.251562
PFLU_5395	-0.508081	0.252288
PFLU_6051	-0.266973	0.25292
PFLU_1119	0.269398	0.253641
PFLU_5890	-0.462652	0.253641
PFLU_1134	-0.386901	0.25384
PFLU_3674	-0.632903	0.254288
PFLU_4455	0.381487	0.254289
PFLU_2729	0.45888	0.254615
PFLU_5512	-0.351864	0.254615
PFLU_4885	-0.485035	0.254615
PFLU_2453	-0.524748	0.254615
PFLU_5601	0.456851	0.254615
PFLU_5399	-0.31542	0.254615
PFLU_1614	0.446111	0.254992
PFLU_3519	0.223774	0.254992
PFLU_2888A	0.595815	0.25508
PFLU_3334	0.346745	0.25508
PFLU_5517	-0.296996	0.25508
PFLU_0528	-0.430486	0.25508
PFLU_5072	-0.289847	0.25508
PFLU_3550	0.392605	0.25508
PFLU_5925	-0.31321	0.255118
PFLU_4674	-0.607542	0.256101
PFLU_0708	0.242285	0.256323
PFLU_5855	0.286324	0.256328
PFLU_2126	-1.06125	0.257117
PFLU_3204	0.429913	0.257192
PFLU_1877	-0.456059	0.257365
PFLU_3633	0.335984	0.257365
PFLU_3445	0.407505	0.257365
PFLU_6095	0.413866	0.257365
PFLU_4632	0.341458	0.257365
PFLU_5880	-0.272163	0.257365
PFLU_4077	0.841652	0.260153
PFLU_3944	0.378298	0.261325
PFLU_1126	0.367356	0.261636
PFLU_4361	0.335596	0.261895
PFLU_3085	0.45365	0.262994
PFLU_1881	-0.3379	0.262994
PFLU_2326	0.679949	0.264053
PFLU_3486	-0.677207	0.264053
PFLU_4881	-0.289396	0.264053
PFLU_3082	0.42044	0.264423
PFLU_3412	-0.408198	0.265581
PFLU_2766	-0.255469	0.265581
PFLU_3014	-0.332362	0.265764
PFLU_5995	-0.299855	0.265764
PFLU_3800	-0.259977	0.265764
PFLU_1087	-0.374669	0.265764
PFLU_2919	-0.298416	0.265944
PFLU_4446	0.355195	0.267567
PFLU_1264	-0.340211	0.267567
PFLU_5717	0.36348	0.269669
PFLU_5983	-0.23928	0.270893
PFLU_3739	0.577888	0.270921
PFLU_5415	-0.262377	0.271513
PFLU_4707	-0.567621	0.271787
PFLU_3073	0.426453	0.271787
PFLU_5513	-0.336271	0.273535
PFLU_0508	0.325683	0.273679
PFLU_2462	0.593188	0.274186
PFLU_0295	0.391534	0.27535
PFLU_0594	-0.655981	0.275738
PFLU_5548	-0.304292	0.276019
PFLU_4677	-0.250856	0.276418
PFLU_4443	-0.240192	0.276909
PFLU_5506	-0.268676	0.276909
PFLU_4170	-0.557148	0.276909
PFLU_4256	0.373055	0.276909
PFLU_6102	-0.419542	0.276909
PFLU_5468	-0.306425	0.276909
PFLU_5889	-0.346784	0.277607
PFLU_2559	0.39578	0.277607
PFLU_1423	0.422999	0.277629
PFLU_1669	-0.43687	0.278065
PFLU_5561	-0.275188	0.278232
PFLU_4168	-0.39179	0.278751
PFLU_5257	-0.361435	0.278779
PFLU_2846	0.340896	0.278779
PFLU_3084	0.443972	0.279106
PFLU_5270	0.291172	0.279503
PFLU_5772	-0.399218	0.279503
PFLU_2307	0.492097	0.279503
PFLU_3177	0.287348	0.279503
PFLU_3805	0.386979	0.279503
PFLU_5136	-0.387411	0.279503
PFLU_4040	-0.293271	0.279503
PFLU_0425	-0.386158	0.279503
PFLU_3136	0.338562	0.279704
PFLU_0617	-0.386695	0.280689
PFLU_3952	-0.760995	0.280727
PFLU_1300	-0.290094	0.280896
PFLU_3784	-0.503135	0.281261
PFLU_3653	0.318956	0.281999
PFLU_1084	0.311643	0.28208
PFLU_5773	-0.352561	0.28208
PFLU_2492	0.418493	0.282336
PFLU_5095	-0.34705	0.285358
PFLU_1170	-0.599534	0.285358
PFLU_4041	-0.332249	0.285804
PFLU_2352	0.232991	0.285804
PFLU_3188	0.512247	0.285962
PFLU_0950	-0.292835	0.285962
PFLU_5651	0.407282	0.285962
PFLU_6130	-0.433663	0.287698
PFLU_0952	-0.334976	0.288936
PFLU_3405	0.26567	0.289074
PFLU_1054	-0.294844	0.289074
PFLU_1099	0.415449	0.289074
PFLU_0454	-0.533097	0.289074
PFLU_1388	0.268402	0.289074
PFLU_3358	0.391593	0.289203
PFLU_1015	0.696712	0.289203
PFLU_5329	-0.283981	0.289203
PFLU_2988	0.327413	0.289203
PFLU_1577	-0.310078	0.289612
PFLU_0463	-0.351709	0.289667
PFLU_5545	-0.273122	0.289878
PFLU_0563	0.50482	0.290111
PFLU_1114	-0.244061	0.290111
PFLU_1223	-0.29116	0.290111
PFLU_2412	0.341445	0.290111
PFLU_1253	-0.241727	0.290222
PFLU_5251	-0.245815	0.291008
PFLU_2366	0.355875	0.291158
PFLU_3389	-0.351533	0.291775
PFLU_2922	-0.304644	0.291775
PFLU_2693	-0.286927	0.291775
PFLU_4797	0.37165	0.291775
PFLU_1886	-0.340295	0.292134
PFLU_5511	-0.365124	0.292413
PFLU_5816	-0.395488	0.292413
PFLU_2826	0.647884	0.292413
PFLU_3487	0.302934	0.293083
PFLU_0319	-0.352433	0.293083
PFLU_2447	-0.341284	0.293083
PFLU_5343	-0.255526	0.293083
PFLU_0487	-0.289433	0.295364
PFLU_0359	-0.282873	0.295364
PFLU_4128D	-0.300778	0.295633
PFLU_4699	-0.396393	0.295819
PFLU_2072	-0.406324	0.295972
PFLU_0945	-0.294212	0.295972
PFLU_2223	0.338722	0.296775
PFLU_1582	0.241202	0.296945
PFLU_5507	-0.30406	0.296956
PFLU_4432	-0.274009	0.296956
PFLU_1788	0.342204	0.296956
PFLU_2642	-0.383227	0.296956
PFLU_6082	0.29868	0.296956
PFLU_2221	0.407404	0.296956
PFLU_0007	-0.21226	0.296956
PFLU_2424	-0.445015	0.296956
PFLU_1685	0.504261	0.297418
PFLU_2686	0.447839	0.297448
PFLU_0144	-0.267396	0.297936
PFLU_5427	-0.269248	0.29812
PFLU_3521	-0.310688	0.298883
PFLU_0177	0.41354	0.298987
PFLU_3585	0.358188	0.300527
PFLU_1199	-0.343371	0.301342
PFLU_5451	-0.358126	0.301342
PFLU_0393	-0.31856	0.302778
PFLU_0342	0.321126	0.303836
PFLU_5250	0.599648	0.303836
PFLU_3157	0.266629	0.303836
PFLU_0557	-0.272164	0.303836
PFLU_0495	0.265584	0.305047
PFLU_4729	0.394957	0.305111
PFLU_5658	0.237409	0.306137
PFLU_0327	-0.281068	0.306233
PFLU_5254	-0.292966	0.307487
PFLU_4442	0.310868	0.307959
PFLU_4615	-0.477596	0.308992
PFLU_0923	-0.403432	0.309024
PFLU_4800	0.609715	0.309686
PFLU_1575	-0.255787	0.309686
PFLU_2327	0.536778	0.309686
PFLU_1789	0.229198	0.309686
PFLU_2242	0.256737	0.309686
PFLU_4980	0.539233	0.309686
PFLU_0241	0.570862	0.309686
PFLU_5013	-0.277406	0.309913
PFLU_5003	0.411093	0.310219
PFLU_4966	-0.456084	0.310219
PFLU_4637	-0.329329	0.310219
PFLU_0964	0.34893	0.310294
PFLU_5980	-0.32384	0.310294
PFLU_1547	0.309668	0.311393
PFLU_4004	-0.535582	0.311393
PFLU_4104	0.299146	0.31156
PFLU_5482	-0.35059	0.312447
PFLU_1049	-0.344927	0.312712
PFLU_2267	0.268762	0.313149
PFLU_3658	-0.349983	0.313149
PFLU_3060	0.45476	0.313149
PFLU_4994	-0.25366	0.313149
PFLU_2108	0.224133	0.313158
PFLU_1082	0.681278	0.313314
PFLU_1787	0.349369	0.313314
PFLU_5141	0.304196	0.314733
PFLU_4905	-0.252809	0.314733
PFLU_0262	-0.445431	0.314928
PFLU_3220	-0.431804	0.315165
PFLU_5088	0.267223	0.315165
PFLU_1269	-0.244215	0.316251
PFLU_4454	0.366211	0.316567
PFLU_0779	-0.234691	0.316567
PFLU_4946	-0.292935	0.317071
PFLU_4568	-1.26306	0.317143
PFLU_1759	-0.235614	0.317143
PFLU_0635	0.269362	0.317143
PFLU_0307	-0.486827	0.31727
PFLU_4122A	0.382015	0.31727
PFLU_3766	-0.377977	0.31732
PFLU_4472	-0.249691	0.317674
PFLU_4490	-0.45908	0.317784
PFLU_3304	0.262727	0.317784
PFLU_4678	-0.235122	0.318585
PFLU_5160	-0.411942	0.320787
PFLU_3444	0.292	0.321739
PFLU_0543	0.278064	0.322275
PFLU_0825	-0.33557	0.322275
PFLU_1222	-0.315712	0.32274
PFLU_5463	-0.393897	0.323384
PFLU_0361	0.363307	0.323427
PFLU_2571	-0.359117	0.323427
PFLU_4264	0.525049	0.323462
PFLU_4374	0.481641	0.323923
PFLU_5984	-0.391419	0.323923
PFLU_0055	0.25372	0.323923
PFLU_5853	0.542938	0.323923
PFLU_5996	-0.233066	0.323925
PFLU_5148	-0.509461	0.324481
PFLU_0325	-0.29405	0.326159
PFLU_1627	0.320252	0.326159
PFLU_3654	0.28443	0.326159
PFLU_1529	-0.241355	0.326159
PFLU_3816	-0.22092	0.326927
PFLU_0279	0.503199	0.327198
PFLU_5754	-0.303613	0.327721
PFLU_1598	0.453811	0.328214
PFLU_0569	-0.279828	0.328214
PFLU_3965	0.3414	0.328214
PFLU_5649	0.363791	0.328214
PFLU_4948	0.294782	0.328378
PFLU_5012	-0.258364	0.328378
PFLU_4395	0.225664	0.328378
PFLU_3513	-0.271132	0.328378
PFLU_4068	0.508547	0.32893
PFLU_1748	-0.330156	0.32893
PFLU_3268	0.286591	0.32893
PFLU_5961	-0.378084	0.329345
PFLU_1848	-0.228995	0.329345
PFLU_0070	-0.278752	0.329345
PFLU_4117	0.350724	0.329366
PFLU_5914	-0.478775	0.329469
PFLU_1672	0.310809	0.329691
PFLU_4938	-0.246733	0.329947
PFLU_2537	0.39642	0.329947
PFLU_5860	-0.332524	0.330293
PFLU_1714	-0.25327	0.330498
PFLU_1286	-0.246489	0.330935
PFLU_0312	-0.527955	0.331172
PFLU_0973	-1.06928	0.331416
PFLU_5338	0.504868	0.331416
PFLU_4228	0.307301	0.331613
PFLU_1576	-0.257451	0.331996
PFLU_4776	0.273862	0.332
PFLU_0944	-0.288065	0.332604
PFLU_5248	-0.400939	0.332741
PFLU_5579	-0.272827	0.33407
PFLU_5082	0.459	0.334664
PFLU_4163	-0.300163	0.335187
PFLU_3067	0.39365	0.335187
PFLU_3555	-0.28109	0.335231
PFLU_5546	-0.239872	0.33604
PFLU_1215	-0.437373	0.336283
PFLU_0398	0.244419	0.336459
PFLU_0874	-0.530729	0.336459
PFLU_4242	-0.273859	0.336459
PFLU_0951	-0.246553	0.336521
PFLU_3678	-0.457494	0.336521
PFLU_4712	-0.321801	0.336521
PFLU_2695	-0.219667	0.336521
PFLU_4271	0.454596	0.336521
PFLU_3835	-0.275877	0.336521
PFLU_3847	-0.325191	0.336521
PFLU_5812	0.381104	0.336738
PFLU_3854	0.45475	0.33713
PFLU_5432	-0.272547	0.337628
PFLU_0739	-0.215271	0.337628
PFLU_5112	0.464441	0.337954
PFLU_5276	-0.314414	0.339913
PFLU_3827	-0.269601	0.340022
PFLU_4561	-0.245505	0.340059
PFLU_6104	-0.258773	0.340059
PFLU_4121	0.194969	0.340059
PFLU_2645	-0.285665	0.340665
PFLU_4972	0.241956	0.341235
PFLU_2160	0.289865	0.341744
PFLU_3102	0.240881	0.342373
PFLU_5626	0.233774	0.342801
PFLU_5414	-0.223766	0.343216
PFLU_5857	0.45953	0.343846
PFLU_0868	-0.231762	0.343846
PFLU_3287	0.426549	0.343924
PFLU_4567	-0.349653	0.344523
PFLU_5675	0.319885	0.344523
PFLU_4709	-0.32037	0.345367
PFLU_3129	-0.391677	0.345367
PFLU_1216	-0.252473	0.345367
PFLU_3234	-0.569728	0.345367
PFLU_3387	0.444409	0.345382
PFLU_5393	0.364877	0.345382
PFLU_5973	0.32065	0.34636
PFLU_1640	0.234658	0.34636
PFLU_1101	0.365237	0.347243
PFLU_1365	0.361369	0.347243
PFLU_0943	-0.255796	0.347243
PFLU_1055	-0.296405	0.347243
PFLU_6008	0.281374	0.347243
PFLU_6054	-0.26171	0.347243
PFLU_4580	0.682129	0.347243
PFLU_4697	-0.251319	0.347243
PFLU_4042	-0.355841	0.347243
PFLU_2338	0.660121	0.347243
PFLU_3286	0.35694	0.347258
PFLU_2235	-0.901071	0.348013
PFLU_4223	0.222009	0.348825
PFLU_4153	0.467633	0.349221
PFLU_3383	0.359102	0.349325
PFLU_5979	-0.312	0.350031
PFLU_0888	-0.374787	0.350031
PFLU_4711	-0.292183	0.350031
PFLU_3892	0.248069	0.350262
PFLU_6108	0.24881	0.350939
PFLU_6126	-0.268042	0.350939
PFLU_3499	0.251677	0.351012
PFLU_1767	0.254834	0.352607
PFLU_3042	-0.296213	0.352792
PFLU_2984	0.297881	0.352792
PFLU_2288	0.358701	0.35357
PFLU_1777	0.503272	0.35357
PFLU_5135	0.353399	0.35357
PFLU_5613	0.291498	0.353945
PFLU_0020	-0.238065	0.353945
PFLU_0142	-0.206328	0.355587
PFLU_4329	0.491058	0.355587
PFLU_2029	0.284211	0.355587
PFLU_5397	0.295816	0.357154
PFLU_3635	0.28367	0.357801
PFLU_1606	0.285216	0.357865
PFLU_2130	0.462302	0.358284
PFLU_5294	0.439089	0.358856
PFLU_1695	0.259448	0.359802
PFLU_0366	0.228699	0.359862
PFLU_5841	0.283964	0.359862
PFLU_3806	0.367235	0.359862
PFLU_2047	-0.621974	0.359862
PFLU_5352	-0.241264	0.360137
PFLU_3522	-0.267961	0.360137
PFLU_3621	-0.562117	0.360355
PFLU_4861	-0.206912	0.361022
PFLU_5604	-0.732436	0.361335
PFLU_0265	0.269472	0.361425
PFLU_1687	-1.25438	0.362043
PFLU_3222	-0.319238	0.362043
PFLU_3967	0.21302	0.362043
PFLU_0942	-0.29783	0.362715
PFLU_4401	0.237162	0.363496
PFLU_0638	0.298544	0.363546
PFLU_4396	0.225245	0.364286
PFLU_4035	-0.217399	0.364896
PFLU_2711	0.331663	0.365322
PFLU_4592	0.20695	0.365748
PFLU_1603	0.528555	0.365748
PFLU_1299	-0.324696	0.366338
PFLU_5898	-0.207226	0.366338
PFLU_1203	-0.257799	0.366338
PFLU_4025	0.474962	0.366338
PFLU_4863	0.325383	0.36714
PFLU_2218	0.294556	0.367223
PFLU_0086	-0.315695	0.367223
PFLU_0113	-0.248703	0.367675
PFLU_3780	-0.402669	0.367675
PFLU_3934	0.593727	0.367875
PFLU_4644	0.246773	0.367957
PFLU_4128C	-0.257712	0.367957
PFLU_4100	0.408619	0.367957
PFLU_5599	-0.27295	0.367957
PFLU_2315	0.269293	0.368508
PFLU_0757	-0.40163	0.368932
PFLU_4858	0.308484	0.369729
PFLU_2892B	0.471987	0.371721
PFLU_0343	0.299522	0.371912
PFLU_6075	-0.260661	0.372571
PFLU_0128	0.314438	0.372809
PFLU_1868	-0.235843	0.374985
PFLU_5076	-0.248756	0.375034
PFLU_4558	-0.198727	0.375034
PFLU_3491	0.357675	0.375034
PFLU_2791	-0.690478	0.375956
PFLU_4026	0.382885	0.375956
PFLU_5109	-0.419199	0.375956
PFLU_0842	-0.215025	0.375956
PFLU_0001	-0.218645	0.375956
PFLU_1510	0.354281	0.375956
PFLU_0438	-0.275665	0.375956
PFLU_1521	-0.191802	0.376509
PFLU_3985	-0.639264	0.377653
PFLU_4969	0.297414	0.378853
PFLU_1319	0.280084	0.378853
PFLU_5332	0.252773	0.378853
PFLU_4336	-0.352926	0.378853
PFLU_1305	0.52681	0.378918
PFLU_5328	-0.315558	0.378918
PFLU_0310	-0.307264	0.378918
PFLU_5469	-0.277505	0.378938
PFLU_2306	0.323523	0.378938
PFLU_1396	-0.243253	0.37942
PFLU_0987	0.571685	0.37942
PFLU_0895	-0.192484	0.37942
PFLU_0050	-0.430566	0.37942
PFLU_3878	0.413962	0.37942
PFLU_3628	-0.298568	0.37974
PFLU_3719	-0.628107	0.380011
PFLU_4941	-0.240989	0.380011
PFLU_5011	-0.250455	0.38088
PFLU_2397	0.284491	0.38088
PFLU_6133	0.219294	0.381144
PFLU_5700	-0.775087	0.381144
PFLU_3655	-0.465054	0.381144
PFLU_4076	0.749117	0.382134
PFLU_4596	0.261078	0.382356
PFLU_2105	0.28845	0.382356
PFLU_5821	-0.218824	0.382356
PFLU_5000	-0.2138	0.382667
PFLU_5169	-0.246374	0.38345
PFLU_1813	0.497393	0.383453
PFLU_5909	0.705461	0.383641
PFLU_1046	-0.644301	0.383798
PFLU_5824	-0.272328	0.383798
PFLU_6060	0.299986	0.384511
PFLU_4249	0.27427	0.384667
PFLU_5515	-0.263876	0.384667
PFLU_1325	0.233019	0.384842
PFLU_1869	-0.264557	0.384842
PFLU_1611	0.985546	0.384842
PFLU_0413	-0.20712	0.385512
PFLU_5044	-0.23751	0.387874
PFLU_2620	0.317839	0.388093
PFLU_5269	0.241919	0.388359
PFLU_1485	0.273665	0.389744
PFLU_2546	0.225794	0.389744
PFLU_5783	-0.241801	0.390329
PFLU_1400	-0.220367	0.39125
PFLU_6116	-0.261171	0.39125
PFLU_5227	-0.287485	0.39125
PFLU_1502	0.233702	0.39264
PFLU_5663	0.354581	0.39264
PFLU_0412	-0.185504	0.39264
PFLU_1424	0.213086	0.392755
PFLU_3594	0.247095	0.392755
PFLU_2892	0.216577	0.39414
PFLU_0182	-0.17775	0.395341
PFLU_4292	0.33945	0.395698
PFLU_2730	0.620227	0.395824
PFLU_2935	0.218726	0.395824
PFLU_4032	0.410481	0.395824
PFLU_1829	0.378458	0.395824
PFLU_0161	-0.320423	0.395824
PFLU_4631	0.303606	0.395824
PFLU_5159	-0.327486	0.396306
PFLU_0240	0.429372	0.397692
PFLU_2770	0.25619	0.397692
PFLU_2931	0.362536	0.398989
PFLU_4796	0.242076	0.400044
PFLU_3174	0.391896	0.400044
PFLU_3880	-0.201216	0.400044
PFLU_2680	-0.266786	0.400044
PFLU_1129	-0.679958	0.400073
PFLU_4651	0.33065	0.400073
PFLU_5177	-0.42075	0.400305
PFLU_3305	0.350859	0.402683
PFLU_4423	-0.34844	0.402742
PFLU_0750	0.19981	0.402756
PFLU_3964	0.258574	0.402756
PFLU_1477	-0.202181	0.403604
PFLU_4634	-0.301906	0.403765
PFLU_2929	0.417416	0.405238
PFLU_5324	-0.193495	0.405697
PFLU_6059	-0.21076	0.405697
PFLU_4859	-0.233613	0.406286
PFLU_1193	-0.271886	0.407094
PFLU_1155	0.448303	0.407128
PFLU_4453	0.27892	0.407128
PFLU_0756	-0.177446	0.407128
PFLU_1866	-0.242348	0.407128
PFLU_4593	0.193534	0.407128
PFLU_5384	-0.302707	0.407128
PFLU_6011	-0.620931	0.407128
PFLU_0681	-0.366629	0.407666
PFLU_4904	-0.21965	0.407666
PFLU_3737	0.257658	0.408036
PFLU_5436	0.365533	0.408997
PFLU_5188	0.190699	0.409197
PFLU_2591	-0.300916	0.409522
PFLU_5446	-0.228969	0.409522
PFLU_0436	0.251554	0.410025
PFLU_4276	0.223548	0.410076
PFLU_4406	-0.296437	0.410076
PFLU_0565	-0.395881	0.410076
PFLU_5847	0.309059	0.410076
PFLU_2086	0.156803	0.410076
PFLU_3109	-0.32069	0.410188
PFLU_3240	-0.660957	0.410551
PFLU_0787	-1.04629	0.411629
PFLU_2281	0.348709	0.411629
PFLU_3248	-0.236361	0.41296
PFLU_5243	-0.17207	0.41296
PFLU_0551	0.270413	0.413802
PFLU_1699	-0.219228	0.413802
PFLU_0192	0.204574	0.413871
PFLU_0767	-0.235814	0.414439
PFLU_2913	0.1836	0.414439
PFLU_4526	-0.212626	0.414439
PFLU_2295	0.316661	0.415138
PFLU_2903	0.293093	0.415138
PFLU_1713	-0.206595	0.415138
PFLU_0336	-0.201446	0.415138
PFLU_1205	-0.231586	0.415508
PFLU_2589	-0.32948	0.415508
PFLU_0096	-0.271632	0.415508
PFLU_1088	0.372288	0.415508
PFLU_0682	-0.262124	0.416393
PFLU_2930	0.390719	0.417526
PFLU_0949	-0.271554	0.417526
PFLU_3916	-0.264038	0.417953
PFLU_1422	0.224673	0.417953
PFLU_5540	-0.195564	0.418027
PFLU_6018	-0.282041	0.418027
PFLU_2875	0.341205	0.418027
PFLU_3675	-0.388395	0.418255
PFLU_5935	0.251234	0.418255
PFLU_0727	0.420151	0.418452
PFLU_1612	0.580218	0.418452
PFLU_3477	0.221983	0.418452
PFLU_2607	0.368961	0.419463
PFLU_4033	-0.229471	0.419693
PFLU_1113	-0.253806	0.419785
PFLU_3694	0.32092	0.421024
PFLU_3980	0.676256	0.421024
PFLU_0448	-0.270368	0.421116
PFLU_4900	0.339226	0.421116
PFLU_5161	-0.285211	0.422289
PFLU_2550	0.45184	0.422455
PFLU_0755	0.204855	0.4227
PFLU_4275	0.402451	0.4227
PFLU_1592	0.513807	0.4227
PFLU_4896	0.38474	0.4227
PFLU_2879	0.604464	0.4227
PFLU_4713	-0.269739	0.4227
PFLU_0780	-0.231258	0.423393
PFLU_3829	-0.201476	0.423393
PFLU_0805	-0.265155	0.423982
PFLU_2726	-0.228104	0.424282
PFLU_0496	0.199769	0.424282
PFLU_2186	-0.306711	0.424282
PFLU_5219	-0.229934	0.424864
PFLU_4818	0.187618	0.425222
PFLU_1613	-0.182843	0.425222
PFLU_4487	0.209011	0.425222
PFLU_0363	0.277212	0.425753
PFLU_3139	0.223492	0.427082
PFLU_3679	-0.44945	0.427082
PFLU_6039	0.206149	0.427621
PFLU_4694	0.217213	0.428892
PFLU_0748	0.184978	0.429619
PFLU_3570	0.550578	0.429619
PFLU_0067	-0.196798	0.429619
PFLU_1263	-0.255312	0.429619
PFLU_5965	0.171713	0.430032
PFLU_5389	-0.231559	0.43056
PFLU_3257	0.191565	0.431198
PFLU_1372	-0.338374	0.431198
PFLU_4340	0.336082	0.43121
PFLU_5454	0.511626	0.43121
PFLU_3083	0.357032	0.43121
PFLU_5782	-0.269694	0.432159
PFLU_1919	0.25251	0.432603
PFLU_2956	-1.08321	0.433236
PFLU_5684	0.256336	0.433484
PFLU_5472	-0.210325	0.434901
PFLU_3392	-0.213781	0.434901
PFLU_3590	0.42825	0.434901
PFLU_3242A	-0.681531	0.434901
PFLU_3279	0.315631	0.435153
PFLU_4102	0.226141	0.435505
PFLU_3272	0.344658	0.43576
PFLU_1596	-0.357896	0.435863
PFLU_4091	-0.362146	0.435863
PFLU_1367	0.276801	0.435863
PFLU_1500	-0.228336	0.435863
PFLU_0918	-0.359426	0.435863
PFLU_5539	-0.19568	0.436803
PFLU_2876	0.364392	0.437871
PFLU_0933	-0.190482	0.437871
PFLU_2662	-0.230611	0.437871
PFLU_2665	-0.239254	0.437871
PFLU_1085	0.286288	0.440284
PFLU_6088	-0.345743	0.44079
PFLU_4424	-0.360458	0.441573
PFLU_3652	0.205782	0.441628
PFLU_1573	-0.285384	0.441851
PFLU_0661	0.53699	0.44255
PFLU_5968	0.248437	0.443581
PFLU_4407	0.247625	0.443615
PFLU_0976	0.241824	0.443615
PFLU_2146	-0.203087	0.443615
PFLU_1374	0.246838	0.444153
PFLU_3775	-0.241337	0.444981
PFLU_4950	-0.201261	0.444981
PFLU_4836	-0.264132	0.445172
PFLU_0455	0.20378	0.445394
PFLU_1389	0.282743	0.446003
PFLU_5939	-0.153269	0.446003
PFLU_2006	0.277614	0.446489
PFLU_2547	-0.458831	0.446836
PFLU_0804	-0.208969	0.447296
PFLU_0352	0.231843	0.447815
PFLU_2774	-0.271188	0.447815
PFLU_4341	-0.157214	0.448653
PFLU_5625	0.241724	0.449412
PFLU_4918	-0.233017	0.449412
PFLU_3937	-0.422911	0.449793
PFLU_4635	-0.19729	0.450064
PFLU_4415	-0.23097	0.450128
PFLU_3443	0.35503	0.450712
PFLU_2676	-0.167651	0.452932
PFLU_0990	0.513144	0.454038
PFLU_2074	-0.230063	0.454197
PFLU_0713	0.506079	0.454197
PFLU_0683	-0.165147	0.45431
PFLU_5263	-0.223197	0.45431
PFLU_5941	-0.19185	0.45431
PFLU_1864	-0.282176	0.454537
PFLU_4193	0.165163	0.454906
PFLU_1827	0.430252	0.455996
PFLU_4739	0.20419	0.455996
PFLU_2602	0.283981	0.455996
PFLU_0786	0.227687	0.457531
PFLU_2824	0.460487	0.457832
PFLU_0616	-0.270692	0.457832
PFLU_5144	-0.406745	0.458896
PFLU_3747	-0.199469	0.458896
PFLU_3983	-0.403354	0.458896
PFLU_5445	0.165979	0.459124
PFLU_3413	-0.528075	0.459242
PFLU_4362	0.188778	0.459242
PFLU_0927	-0.178415	0.459242
PFLU_3858	0.525322	0.459242
PFLU_3765	0.250023	0.459419
PFLU_1915	0.229361	0.45986
PFLU_5404	-0.163759	0.459979
PFLU_0643	-0.263558	0.460101
PFLU_2116	-0.325478	0.460101
PFLU_4099	0.306278	0.462484
PFLU_1117	-0.255507	0.463673
PFLU_5007	-0.164217	0.463888
PFLU_4181	-0.173656	0.463888
PFLU_2488	0.200235	0.463973
PFLU_2963	-0.329842	0.464133
PFLU_4074	-0.826103	0.465701
PFLU_0691	0.168011	0.465743
PFLU_3179A	0.304908	0.465743
PFLU_4418	0.20073	0.46599
PFLU_4922	0.195321	0.46599
PFLU_0464	-0.248393	0.466203
PFLU_4531	0.168279	0.467357
PFLU_3271	0.274992	0.467555
PFLU_1671	0.238292	0.467669
PFLU_4255	0.488544	0.467669
PFLU_5216	0.2462	0.467828
PFLU_1814	0.345898	0.469384
PFLU_5627	-0.307601	0.470142
PFLU_4745	-0.135024	0.470187
PFLU_4764	0.365001	0.470838
PFLU_4399	0.219075	0.471559
PFLU_1152	-0.21911	0.471967
PFLU_0909	0.412588	0.472941
PFLU_2970	0.389231	0.472941
PFLU_4560	-0.246015	0.472941
PFLU_4794	-0.542572	0.472941
PFLU_0640	0.240541	0.472941
PFLU_4887	-0.204572	0.472941
PFLU_6097	0.231178	0.473034
PFLU_1616	-0.408123	0.473044
PFLU_5892	-0.205483	0.473044
PFLU_0538	-0.167635	0.473634
PFLU_0934	-0.403628	0.473795
PFLU_4312	-0.158344	0.473832
PFLU_4838	-0.198348	0.473832
PFLU_5113	0.499445	0.47412
PFLU_2900	0.367554	0.47412
PFLU_2996	0.326039	0.47412
PFLU_3707	0.317294	0.47412
PFLU_5591	0.231931	0.47516
PFLU_4844	-0.212725	0.47516
PFLU_1585	-0.191605	0.47516
PFLU_5967	0.229959	0.476359
PFLU_1801	0.290736	0.476359
PFLU_4579	-0.223033	0.476829
PFLU_4095	0.24699	0.476829
PFLU_3122	0.204344	0.477391
PFLU_3269	0.260184	0.477845
PFLU_0946	-0.222297	0.477845
PFLU_0752	0.226157	0.478975
PFLU_0649	-0.379101	0.478975
PFLU_1867	-0.16203	0.478975
PFLU_4795	-0.238474	0.478975
PFLU_3476	0.233555	0.478975
PFLU_3545	-0.652769	0.478975
PFLU_3860	0.378418	0.478975
PFLU_2566	0.235315	0.478975
PFLU_5442	-0.361915	0.478975
PFLU_1602	-0.275313	0.478975
PFLU_1087A	-0.278333	0.478975
PFLU_3311	-0.187385	0.479338
PFLU_4917	-0.181162	0.479941
PFLU_3036	-0.209516	0.479946
PFLU_2224	0.342642	0.480248
PFLU_0733	-0.26916	0.480248
PFLU_4043	-0.269205	0.480248
PFLU_3552	-0.274096	0.480248
PFLU_1351	-0.463028	0.480464
PFLU_0906	-0.216752	0.481089
PFLU_3464	-0.17445	0.481089
PFLU_3905	-0.179838	0.482434
PFLU_2724	-0.272162	0.482434
PFLU_2509A	-0.354253	0.482434
PFLU_4459	0.307298	0.482771
PFLU_5344	0.196958	0.482946
PFLU_3680	-0.585093	0.482946
PFLU_0485	-0.174986	0.485663
PFLU_0839	-0.208484	0.486288
PFLU_0948	-0.20558	0.486411
PFLU_5516	-0.172461	0.486612
PFLU_5099	-0.348629	0.486612
PFLU_2301	-0.225453	0.486612
PFLU_0521	-0.14837	0.486874
PFLU_5817	-0.260396	0.486874
PFLU_3255	0.213618	0.488884
PFLU_3462	0.214688	0.489055
PFLU_3781	-0.472762	0.489055
PFLU_3720	0.334946	0.490672
PFLU_3288	0.334069	0.490769
PFLU_2439	0.546424	0.491858
PFLU_0966	0.288179	0.491964
PFLU_1834	0.17588	0.491964
PFLU_6115	-0.283467	0.492917
PFLU_4268	0.449261	0.493447
PFLU_0155	-0.427803	0.49352
PFLU_3695	0.579154	0.493575
PFLU_4064	0.850247	0.49368
PFLU_4188	-0.20105	0.494207
PFLU_4309	0.311767	0.494601
PFLU_0093	-0.263159	0.494601
PFLU_1044	-0.295247	0.494601
PFLU_1376	-0.176038	0.495112
PFLU_1332	-0.15536	0.495866
PFLU_4293	0.274858	0.496768
PFLU_2451	-0.280413	0.496943
PFLU_4782	0.209827	0.498379
PFLU_6050	-0.129573	0.498496
PFLU_5309	-0.180885	0.498645
PFLU_4034	0.215469	0.498645
PFLU_4133	0.365109	0.498645
PFLU_2818	-0.342093	0.498645
PFLU_0644	-0.244776	0.499596
PFLU_4306	0.280526	0.499596
PFLU_0924	-0.312353	0.500041
PFLU_4538	-0.175505	0.500353
PFLU_3893	0.190115	0.50039
PFLU_2386	0.233357	0.501836
PFLU_0447	-0.291468	0.502308
PFLU_2289	0.223247	0.502569
PFLU_2822	-0.42495	0.502569
PFLU_1721	0.462618	0.502569
PFLU_1903A	-0.319798	0.502743
PFLU_1292	0.256527	0.503238
PFLU_0765	-0.235336	0.503565
PFLU_4370	-0.172005	0.503565
PFLU_4483	-0.167716	0.503565
PFLU_4728	0.269042	0.504057
PFLU_3409	0.318618	0.504057
PFLU_4958	-0.265363	0.504057
PFLU_3650	0.228211	0.504057
PFLU_1067	-0.248286	0.504057
PFLU_4786	-0.209123	0.504057
PFLU_0488	0.422853	0.504057
PFLU_5650	0.245342	0.504057
PFLU_2943	0.176092	0.504057
PFLU_5335	-0.166843	0.505767
PFLU_4272	0.614701	0.50609
PFLU_0764	-0.169661	0.508588
PFLU_3081	0.307925	0.509072
PFLU_0197	0.214047	0.509659
PFLU_0382	0.142643	0.510101
PFLU_3785	-0.170416	0.510101
PFLU_5982	-0.215922	0.510208
PFLU_1471	0.230196	0.510374
PFLU_5790	-0.166002	0.510374
PFLU_0614	0.170768	0.510374
PFLU_3321	0.145708	0.510374
PFLU_3048	0.430388	0.511848
PFLU_0625	-0.257877	0.512442
PFLU_2991	-0.18214	0.512442
PFLU_0104	-0.183819	0.512518
PFLU_4426	-0.206532	0.512879
PFLU_5146	-0.386366	0.513751
PFLU_5568	0.165699	0.514287
PFLU_5311	-0.227591	0.514383
PFLU_4913	-0.133268	0.514737
PFLU_4447	0.309429	0.515075
PFLU_3223	-0.189245	0.515095
PFLU_3467	0.207403	0.515095
PFLU_4803	-0.220998	0.517447
PFLU_2673	0.181947	0.518143
PFLU_0995	0.164694	0.520657
PFLU_2036	0.217754	0.521437
PFLU_0554	0.207173	0.521437
PFLU_4685	0.189061	0.521437
PFLU_0394	-0.177382	0.521437
PFLU_3811	-0.174926	0.521437
PFLU_1706	-0.19847	0.521437
PFLU_4710	-0.213448	0.521437
PFLU_2262	0.28119	0.521625
PFLU_4559	-0.153882	0.522591
PFLU_3433	0.186235	0.522591
PFLU_5514	-0.237947	0.522672
PFLU_5704	-0.203548	0.522672
PFLU_2997	0.221549	0.522672
PFLU_4895	-0.177399	0.522672
PFLU_5464	-0.270277	0.522708
PFLU_4251	0.144679	0.522726
PFLU_0013	-0.192607	0.523687
PFLU_4313	-0.167613	0.524972
PFLU_2346	-0.181904	0.525035
PFLU_5421	-0.195067	0.525727
PFLU_1936	0.585563	0.525727
PFLU_5015	-0.212429	0.526127
PFLU_0999	-0.222786	0.527582
PFLU_4322	-0.251194	0.527657
PFLU_5211	0.158712	0.529365
PFLU_4603	-0.159255	0.530339
PFLU_5962	-0.185583	0.530339
PFLU_3149	-0.207165	0.530571
PFLU_2708	0.328124	0.530668
PFLU_3698	-0.310242	0.531176
PFLU_0742	-0.295671	0.532652
PFLU_3318	-0.243021	0.532807
PFLU_1758	-0.341118	0.532807
PFLU_2197	0.293602	0.532807
PFLU_6103	-0.272842	0.532828
PFLU_5771	-0.250548	0.533456
PFLU_5305	-0.227939	0.533456
PFLU_3300	0.164141	0.53427
PFLU_4417	0.203293	0.534365
PFLU_4330	-0.194513	0.534365
PFLU_5156	0.24008	0.534495
PFLU_0838	-0.167019	0.534495
PFLU_1941	-0.17318	0.534495
PFLU_0272	0.203369	0.534495
PFLU_3754	0.240464	0.534495
PFLU_5383	-0.360478	0.53491
PFLU_3246	-0.181646	0.53491
PFLU_5193	0.240997	0.53491
PFLU_0016	-0.195975	0.535803
PFLU_1068	-0.319597	0.536068
PFLU_5584	0.178611	0.536533
PFLU_4901	-0.171139	0.537063
PFLU_6007	-0.163208	0.537155
PFLU_4539	-0.15206	0.537155
PFLU_5810	0.280714	0.537155
PFLU_0830	0.212473	0.537389
PFLU_3861	-0.287278	0.538067
PFLU_1597	-0.270611	0.538439
PFLU_2844	-0.168502	0.538439
PFLU_0136	0.201479	0.538455
PFLU_4372	-0.209418	0.538455
PFLU_5580	-0.196779	0.538455
PFLU_2073	-0.193043	0.538753
PFLU_0813	-0.336728	0.538753
PFLU_1908	0.206335	0.539042
PFLU_5027	-0.251631	0.539042
PFLU_0337	-0.180932	0.540886
PFLU_4780	0.253718	0.54269
PFLU_1666	-0.15731	0.542726
PFLU_1690	0.168228	0.5433
PFLU_2586	-0.253191	0.543831
PFLU_3620	0.514293	0.543831
PFLU_0988	0.407485	0.546218
PFLU_2677	-0.203418	0.546682
PFLU_2354	0.163054	0.546682
PFLU_4394	0.141779	0.54674
PFLU_1730	0.201642	0.547301
PFLU_0840	-0.190324	0.547786
PFLU_5796	-0.172775	0.547786
PFLU_4974	-0.22536	0.547896
PFLU_2661	0.145837	0.547896
PFLU_2788	-0.279963	0.54827
PFLU_4668	0.274694	0.549201
PFLU_0097	-0.274716	0.549856
PFLU_0223	0.314747	0.549988
PFLU_2757	0.279611	0.550596
PFLU_2611	-0.319691	0.550814
PFLU_4248	-0.214293	0.551474
PFLU_1702	0.277024	0.552356
PFLU_5053	0.160813	0.552356
PFLU_2028	0.241417	0.552618
PFLU_4860	0.121374	0.552736
PFLU_0225	-0.320339	0.553027
PFLU_2939	0.177382	0.55337
PFLU_4270	0.301416	0.555252
PFLU_4883	-0.150587	0.556299
PFLU_1476	-0.166516	0.556299
PFLU_1896	0.240131	0.556299
PFLU_5881	-0.141043	0.556299
PFLU_0411	0.221914	0.556536
PFLU_3879	-0.133032	0.557658
PFLU_2233	-0.669901	0.558133
PFLU_6037	-0.169591	0.55837
PFLU_4936	0.177144	0.558919
PFLU_2156	0.186157	0.559495
PFLU_2135	-0.141201	0.55996
PFLU_0806	-0.199016	0.560804
PFLU_0603	-0.185706	0.561557
PFLU_3523	0.152816	0.562579
PFLU_0531	-0.152305	0.562648
PFLU_0553	0.181736	0.562912
PFLU_2394	-0.289957	0.563281
PFLU_2371	-0.226242	0.563281
PFLU_5736	0.236558	0.56445
PFLU_3958	-0.341922	0.56588
PFLU_0024	-0.273934	0.56588
PFLU_0663	0.200837	0.56592
PFLU_4512	0.235794	0.56592
PFLU_2280	0.212259	0.566305
PFLU_1870	-0.208972	0.566706
PFLU_3619	-0.51878	0.568506
PFLU_4023	-0.451552	0.568506
PFLU_5174	-0.285498	0.568949
PFLU_3874	-0.25575	0.568949
PFLU_4926	-0.192971	0.568949
PFLU_3750	-0.21498	0.568949
PFLU_4008	-0.210046	0.568949
PFLU_1892	0.224981	0.568949
PFLU_1336	0.244067	0.568949
PFLU_0588	0.253189	0.568949
PFLU_2123	-0.203837	0.568961
PFLU_0191	0.173303	0.568961
PFLU_4044	-0.169616	0.569146
PFLU_4723	-0.13347	0.569146
PFLU_1885	0.193674	0.569904
PFLU_3320	0.376551	0.569941
PFLU_0147	0.244086	0.570799
PFLU_1976	0.230214	0.570799
PFLU_5025	-0.288238	0.570799
PFLU_1250	0.16419	0.571276
PFLU_3024	0.181986	0.57186
PFLU_0072	0.122827	0.572057
PFLU_1010	0.186724	0.57328
PFLU_3640	0.287712	0.575193
PFLU_0105	0.262641	0.575582
PFLU_3466	0.165272	0.575701
PFLU_0345	-0.33218	0.576855
PFLU_5210	0.14666	0.577147
PFLU_3926	-0.166869	0.577161
PFLU_0504	-0.122816	0.577322
PFLU_4738	-0.154847	0.57762
PFLU_4098	0.211519	0.578206
PFLU_0747	-0.13527	0.57829
PFLU_0380	0.252861	0.57829
PFLU_5256	-0.175293	0.57829
PFLU_1069	-0.181373	0.57829
PFLU_2714	-0.170011	0.57829
PFLU_2852	0.329789	0.57829
PFLU_5784	-0.177232	0.57829
PFLU_4650	-0.357964	0.57829
PFLU_2121	0.218435	0.57829
PFLU_5788	0.190335	0.578444
PFLU_4500	0.183658	0.578973
PFLU_5337	-0.188279	0.578973
PFLU_4486	-0.145383	0.58009
PFLU_0486	-0.141517	0.582106
PFLU_3274	0.192374	0.582124
PFLU_1345	-0.175164	0.582124
PFLU_5195	0.203836	0.582336
PFLU_1122	0.32548	0.582415
PFLU_4075	0.575685	0.582415
PFLU_5045	-0.216821	0.582415
PFLU_1436	0.16061	0.582944
PFLU_1202	-0.151819	0.583174
PFLU_4507	-0.135654	0.583602
PFLU_1103	-0.178612	0.584089
PFLU_0556	0.151777	0.585036
PFLU_2789	0.270229	0.585375
PFLU_5163	0.196026	0.585375
PFLU_3131	-0.183757	0.585375
PFLU_5992	-0.149032	0.585462
PFLU_4430	0.191797	0.587294
PFLU_0769	-0.152113	0.587676
PFLU_2003	0.245197	0.587813
PFLU_0705	0.157524	0.588008
PFLU_5176	-0.331313	0.588025
PFLU_3294	0.211529	0.588881
PFLU_0984	0.421409	0.588893
PFLU_3008	0.175226	0.589892
PFLU_3280	0.212753	0.591058
PFLU_6109	-0.163672	0.591194
PFLU_0139	-0.135397	0.591194
PFLU_5456	-0.184845	0.592117
PFLU_1564	-0.199762	0.592909
PFLU_3786	-0.13325	0.593218
PFLU_2674	-0.132517	0.593339
PFLU_3488	-0.133068	0.594343
PFLU_4314	0.13056	0.594384
PFLU_5661	0.230829	0.595462
PFLU_0947	-0.174878	0.59611
PFLU_0203	0.34521	0.59815
PFLU_0248	0.11307	0.59815
PFLU_5031	0.258	0.59815
PFLU_4682	0.146427	0.598401
PFLU_4475	0.169815	0.598575
PFLU_3123	0.191814	0.599137
PFLU_0291	-0.127964	0.599426
PFLU_5974	-0.167457	0.599427
PFLU_1493	-0.208574	0.600607
PFLU_2443	0.223378	0.600654
PFLU_3289	0.261716	0.601039
PFLU_5556	0.17325	0.601086
PFLU_4388	0.371893	0.601086
PFLU_4532	-0.128409	0.601086
PFLU_5353	-0.114788	0.601086
PFLU_0175	0.35587	0.601086
PFLU_4380	0.143662	0.602071
PFLU_1649	-0.156362	0.602334
PFLU_5479	-0.18495	0.602998
PFLU_4594	0.125493	0.604254
PFLU_1105	0.151005	0.604365
PFLU_5843	0.128664	0.604677
PFLU_0034	0.212781	0.605639
PFLU_5581	-0.141077	0.605972
PFLU_0865	-0.248174	0.605972
PFLU_4366	-0.316057	0.606688
PFLU_5886	-0.195565	0.606688
PFLU_3502	0.210205	0.606688
PFLU_1907	0.267819	0.606718
PFLU_3379	-0.200039	0.607115
PFLU_1830	0.158237	0.607115
PFLU_3033	-0.430539	0.607115
PFLU_4162	-0.28659	0.607115
PFLU_5582	0.175336	0.607964
PFLU_5241	-0.170727	0.607964
PFLU_3668	-0.359445	0.608859
PFLU_4073	0.404399	0.609978
PFLU_5647	0.186709	0.611393
PFLU_5433	0.148052	0.611634
PFLU_1835	-0.166101	0.611634
PFLU_1411	-0.174625	0.611634
PFLU_1608	-0.336707	0.612163
PFLU_2659	0.165041	0.612163
PFLU_0261	-0.116812	0.612163
PFLU_0527	-0.204933	0.613349
PFLU_3966	0.154788	0.613349
PFLU_2736	0.183075	0.613349
PFLU_4179	0.14322	0.613444
PFLU_0043	0.200521	0.613563
PFLU_3762	0.222968	0.614919
PFLU_3401	-0.12291	0.615935
PFLU_2099	0.196674	0.61603
PFLU_1473	0.194654	0.616727
PFLU_4686	0.137157	0.616882
PFLU_0369	0.125562	0.617434
PFLU_1571	0.123156	0.617434
PFLU_4080	-0.234104	0.617434
PFLU_1390	-0.209154	0.617434
PFLU_2097	-0.120912	0.617434
PFLU_5285	0.180051	0.617434
PFLU_1483	0.197684	0.617802
PFLU_1224	0.150066	0.61806
PFLU_4460	0.219194	0.61806
PFLU_3135	0.186827	0.61806
PFLU_1727	0.284065	0.61806
PFLU_0931	0.137371	0.61806
PFLU_5262	-0.130755	0.61806
PFLU_1893	0.165083	0.61806
PFLU_1045	0.3951	0.618734
PFLU_3187	0.222759	0.620596
PFLU_5559	-0.126752	0.620916
PFLU_4438	0.159314	0.620984
PFLU_4135	-0.402503	0.620984
PFLU_3588	-0.200107	0.620984
PFLU_5310	0.182952	0.620984
PFLU_5126	0.263727	0.620984
PFLU_4027	-0.417798	0.620984
PFLU_5100	-0.204595	0.620984
PFLU_3216	0.318458	0.62218
PFLU_3155	-0.143513	0.62303
PFLU_2979	0.210237	0.623486
PFLU_1566	-0.126724	0.623486
PFLU_3818	0.165556	0.623486
PFLU_3839	-0.147795	0.623486
PFLU_5500	0.153045	0.623639
PFLU_0205	0.254606	0.624467
PFLU_2145	-0.137099	0.624467
PFLU_3508	-0.244491	0.624484
PFLU_4416	-0.147527	0.624655
PFLU_3424	-0.319341	0.624655
PFLU_5774	0.209516	0.624655
PFLU_2572	0.146405	0.624655
PFLU_0922	-0.264023	0.624655
PFLU_3295	0.175057	0.624655
PFLU_4448	0.333627	0.624709
PFLU_0621	-0.167552	0.624709
PFLU_2651	0.240805	0.624709
PFLU_2733	0.129147	0.624709
PFLU_2865	-0.202333	0.624709
PFLU_1256	-0.177472	0.624709
PFLU_0837	0.111485	0.625095
PFLU_3759	0.192829	0.62865
PFLU_2544	0.230463	0.628694
PFLU_4243	-0.331691	0.629355
PFLU_3276	0.18839	0.630246
PFLU_4584	-0.141575	0.630246
PFLU_2270	-0.111433	0.631378
PFLU_6129	-0.114809	0.631378
PFLU_4010	-0.127441	0.632288
PFLU_0602	-0.166724	0.632604
PFLU_1724	-0.1921	0.632604
PFLU_0709	0.153646	0.633159
PFLU_3153	-0.202087	0.633159
PFLU_0103	-0.200496	0.633159
PFLU_1209	-0.156237	0.633159
PFLU_5348	-0.227919	0.633159
PFLU_0018	0.107812	0.633159
PFLU_3333	0.197111	0.633159
PFLU_1875	0.155208	0.633159
PFLU_1197	-0.283718	0.633159
PFLU_1520	0.125028	0.633446
PFLU_2515A	0.142862	0.633461
PFLU_5583	0.154301	0.634207
PFLU_5628	-0.189242	0.634207
PFLU_2178	-0.265824	0.635194
PFLU_3767	0.284245	0.635972
PFLU_5924	-0.175473	0.635972
PFLU_2402	-0.177737	0.636222
PFLU_0211	0.139318	0.636749
PFLU_2129	0.132911	0.637839
PFLU_0932	-0.130146	0.638243
PFLU_5460	-0.19244	0.638243
PFLU_1593	0.233767	0.638243
PFLU_5292	-0.179453	0.638843
PFLU_2109	-0.158335	0.639362
PFLU_4410	0.136478	0.639428
PFLU_2694	-0.217916	0.639428
PFLU_5694	-0.122974	0.639475
PFLU_2787	-0.227339	0.639527
PFLU_5641	-0.129088	0.639527
PFLU_5882	0.12817	0.639527
PFLU_5662	0.203202	0.639673
PFLU_4595	0.109611	0.639863
PFLU_5449	-0.248595	0.639863
PFLU_5729	0.171171	0.639876
PFLU_1920	0.145267	0.639884
PFLU_3270	0.221092	0.640575
PFLU_1220	-0.201966	0.640884
PFLU_1277	0.135958	0.640884
PFLU_2690	-0.12621	0.640884
PFLU_2543	0.190619	0.641751
PFLU_4527	-0.190171	0.641751
PFLU_1302	0.139771	0.642093
PFLU_6076	-0.247457	0.642557
PFLU_2246	-0.272421	0.642557
PFLU_1431	0.170534	0.642557
PFLU_4066	-0.299118	0.643041
PFLU_2382	-0.115546	0.643491
PFLU_5725	-0.124605	0.643491
PFLU_3924	-0.215118	0.644759
PFLU_0985	0.308803	0.644763
PFLU_5217	-0.13535	0.644763
PFLU_1855	0.123103	0.645104
PFLU_2118	-0.163661	0.645104
PFLU_2470	-0.208778	0.645534
PFLU_2653	-0.14606	0.647552
PFLU_2367	-0.204765	0.647736
PFLU_1757	0.114354	0.648279
PFLU_4708	-0.213954	0.648279
PFLU_3561	0.233256	0.648305
PFLU_5052	-0.106061	0.648468
PFLU_3567	0.132156	0.648515
PFLU_1945	-0.193165	0.648515
PFLU_2568	-0.138695	0.648608
PFLU_1921	-0.316372	0.648608
PFLU_1494	-0.199669	0.64886
PFLU_3359	-0.137315	0.649521
PFLU_0941	-0.143468	0.649521
PFLU_4331	0.153342	0.649521
PFLU_2473	0.221263	0.649726
PFLU_2990	0.172841	0.649869
PFLU_3398	0.366504	0.650822
PFLU_3988	0.153272	0.651847
PFLU_0171	-0.136033	0.651971
PFLU_4830	-0.176998	0.65294
PFLU_1369	0.108452	0.653816
PFLU_3224	0.121588	0.653928
PFLU_5905	0.170987	0.654001
PFLU_0867	-0.11345	0.654277
PFLU_5731	-0.225823	0.655835
PFLU_2585	-0.158261	0.655835
PFLU_2142	-0.138796	0.655917
PFLU_5738	0.171386	0.65605
PFLU_2710	-0.186113	0.656227
PFLU_4452	0.15411	0.657073
PFLU_1050	-0.171865	0.657231
PFLU_5229	0.167408	0.657231
PFLU_0124	0.238784	0.657231
PFLU_1275	-0.304537	0.657231
PFLU_5429	-0.131561	0.658262
PFLU_4733	0.153728	0.658708
PFLU_3888	0.114158	0.658708
PFLU_1639	0.121792	0.660303
PFLU_3953	0.220491	0.660303
PFLU_4319	0.101729	0.660765
PFLU_1756	-0.177888	0.660815
PFLU_0788	-0.380307	0.660815
PFLU_2980	-0.150326	0.660815
PFLU_3306	0.194989	0.660933
PFLU_5357	0.323308	0.660933
PFLU_3831	0.233291	0.660933
PFLU_4763	0.114334	0.661021
PFLU_3721	0.277623	0.661226
PFLU_2131	-0.146524	0.661226
PFLU_0760	-0.151532	0.661475
PFLU_1019	-0.107259	0.661522
PFLU_4987	-0.154847	0.661587
PFLU_3277	0.121539	0.661587
PFLU_4414	0.195555	0.661697
PFLU_0520	-0.116823	0.661697
PFLU_0109	0.32641	0.661697
[truncated: 1,035 more rows]

## Sheet: D
Geneid	control.che.5dpi.logFC	control.che.5dpi.FDR
PFLU_2686	9.34231	6.65556e-13
PFLU_1128	-7.51111	1.86364e-09
PFLU_0660	8.37365	2.00926e-10
PFLU_1129	-7.41187	2.05684e-10
PFLU_2738	6.96782	1.27473e-10
PFLU_1127	-6.70514	4.81053e-11
PFLU_3106	-7.72958	2.25436e-12
PFLU_3358	-7.0975	2.53607e-13
PFLU_1598	-6.7138	1.7704e-12
PFLU_1577	6.83104	7.12595e-14
PFLU_2054	4.79627	9.06838e-11
PFLU_2295	-6.7608	5.80199e-13
PFLU_0596	-5.92727	1.24558e-11
PFLU_1122	-6.34366	1.24086e-11
PFLU_4818	-6.76943	8.45165e-15
PFLU_2125	-6.68981	4.59859e-13
PFLU_2808	-6.60989	1.33774e-13
PFLU_1123	-5.80151	7.13961e-10
PFLU_1083	-6.32479	3.53768e-11
PFLU_5861	-6.45316	4.59546e-13
PFLU_1082	-6.12944	1.35983e-09
PFLU_4340	-6.3191	2.72297e-12
PFLU_4448	-6.41572	8.36405e-10
PFLU_4728	-6.41469	1.16323e-12
PFLU_0399	5.54772	1.1512e-13
PFLU_1124	-5.87992	1.35794e-09
PFLU_4447	-6.36745	9.47207e-12
PFLU_5038	-4.90304	1.52534e-10
PFLU_2296	-6.38636	5.45451e-13
PFLU_3427	-6.35231	1.10608e-12
PFLU_4730	-6.35983	7.12595e-14
PFLU_4729	-6.34491	7.87906e-13
PFLU_4569	-6.326	3.92338e-12
PFLU_2262	-6.28457	2.905e-12
PFLU_3735	-6.28659	1.46836e-12
PFLU_4444	-6.27536	8.43676e-13
PFLU_4733	-6.22169	2.79747e-13
PFLU_5113	4.48546	2.95661e-05
PFLU_5608	-6.12127	5.47852e-13
PFLU_0661	6.1718	4.16723e-09
PFLU_3841	6.15924	1.13406e-10
PFLU_1125	-5.90546	2.23024e-12
PFLU_4414	-6.10551	4.80739e-12
PFLU_0916	-6.10104	1.09341e-12
PFLU_1130	-5.86838	1.07666e-11
PFLU_0566	5.73528	2.36338e-13
PFLU_3765A	-6.04755	7.12595e-14
PFLU_4551	-6.04409	5.3285e-13
PFLU_0595	-5.36983	1.21956e-12
PFLU_4502	5.98888	6.34284e-09
PFLU_5091	-5.12901	2.06719e-11
PFLU_3047	-5.95989	7.87906e-13
PFLU_4452	-5.93237	3.23134e-13
PFLU_1247	-5.92292	9.83596e-13
PFLU_4971	-5.91501	1.6838e-12
PFLU_1155	-5.82022	1.35918e-10
PFLU_1412	-3.75157	0.00693161
PFLU_4451	-5.85808	2.79747e-13
PFLU_0658	5.39518	1.29613e-11
PFLU_4800	5.44684	2.06291e-09
PFLU_3765	-5.84958	3.22948e-13
PFLU_1597	-5.84818	2.92568e-12
PFLU_4455	-5.82477	3.89615e-13
PFLU_3409	-5.73322	1.95367e-11
PFLU_0652	4.31769	0.000219002
PFLU_4407	-5.78135	3.05484e-13
PFLU_4731	-5.77554	7.12595e-14
PFLU_3379	-5.74959	8.87811e-13
PFLU_4417	-5.74092	3.22948e-13
PFLU_2711	-5.63086	1.21234e-12
PFLU_4454	-5.72685	1.04336e-12
PFLU_5094	-5.53711	1.06362e-10
PFLU_4413	-5.69116	3.45344e-12
PFLU_2308	5.0906	2.31102e-09
PFLU_0966	-5.66068	5.64611e-12
PFLU_0509	-5.63067	1.94766e-13
PFLU_1485	-5.60797	2.79747e-13
PFLU_4453	-5.59401	5.80199e-13
PFLU_5039	-4.36668	3.38074e-10
PFLU_5040	-3.76222	3.43534e-08
PFLU_4445	-5.58713	4.55103e-12
PFLU_0117	-5.56226	2.79912e-12
PFLU_5095	-5.53265	1.98627e-13
PFLU_2358	-5.52966	3.98924e-11
PFLU_5037	-4.78934	2.72297e-12
PFLU_4442	-5.48906	2.52888e-13
PFLU_4721	-3.87921	3.28592e-08
PFLU_0751	-5.44843	1.31672e-13
PFLU_0398	4.9482	2.52888e-13
PFLU_4450	-5.42085	9.97839e-13
PFLU_4416	-5.40164	1.80026e-13
PFLU_4430	-5.37526	8.82219e-13
PFLU_5362	-4.50867	2.79747e-13
PFLU_4411	-5.37325	8.43676e-13
PFLU_6043	-5.37192	1.83254e-13
PFLU_3318	4.34716	9.19377e-10
PFLU_0745	-5.24202	7.12595e-14
PFLU_4276	-5.1134	7.12595e-14
PFLU_4456	-5.34358	9.4414e-13
PFLU_0752	-5.00494	6.25672e-13
PFLU_3744	-5.31263	8.47585e-12
PFLU_0744	-5.04472	2.79747e-13
PFLU_1358	-4.59138	4.99567e-06
PFLU_3745	-5.27747	7.56153e-13
PFLU_0964	-5.25994	7.87906e-13
PFLU_2297	-5.25365	3.22948e-13
PFLU_5096	-5.23722	7.12595e-14
PFLU_4410	-5.23515	1.22144e-13
PFLU_3741	-5.23251	9.39212e-11
PFLU_5499	4.45847	7.68806e-12
PFLU_1687	-4.35332	7.48855e-05
PFLU_1084	-5.12829	1.1512e-13
PFLU_2931	4.42059	5.28709e-09
PFLU_4529	5.20602	7.89245e-09
PFLU_0594	-4.59457	5.3637e-11
PFLU_1471	4.42391	7.83565e-12
PFLU_4441	-5.14741	5.80199e-13
PFLU_1043	-1.05542	0.0175908
PFLU_4401	-5.13472	1.00682e-13
PFLU_4948	-5.10854	3.23134e-13
PFLU_0874	-3.75707	2.11706e-10
PFLU_4463	3.80029	4.12894e-09
PFLU_4250	-5.08981	1.46836e-12
PFLU_4415	-5.08335	4.16276e-13
PFLU_0965	-4.95026	1.33396e-12
PFLU_3743	-5.06342	1.16323e-12
PFLU_0083	4.80625	4.8214e-13
PFLU_4295	4.58061	1.2699e-12
PFLU_0990	4.51745	8.18057e-08
PFLU_4408	-5.02951	3.22948e-13
PFLU_4969	-4.29438	8.10627e-13
PFLU_3746	-5.00448	2.8388e-12
PFLU_1830	4.13118	3.45344e-12
PFLU_4257	-4.95388	2.36338e-13
PFLU_3290	4.94045	3.83373e-09
PFLU_5269	4.38237	7.87906e-13
PFLU_3042	-4.80629	8.51448e-13
PFLU_1814	-4.92666	1.37665e-10
PFLU_5092	-4.77866	7.40887e-12
PFLU_4936	-4.92135	3.23134e-13
PFLU_5112	2.71268	7.07281e-06
PFLU_3279	4.73702	1.45018e-10
PFLU_1085	-4.89678	1.10608e-12
PFLU_4409	-4.88855	8.74172e-14
PFLU_0749	-4.70364	1.1512e-13
PFLU_0746	-4.79371	7.12595e-14
PFLU_3752	4.70839	1.29609e-09
PFLU_0910	-4.518	9.45558e-12
PFLU_2918	-4.05424	1.0705e-11
PFLU_1716	3.21832	0.00121629
PFLU_0597	-4.71972	1.73417e-11
PFLU_3944	-4.74104	2.08684e-12
PFLU_0363	-4.72115	3.35195e-12
PFLU_1616	-4.02874	2.11706e-10
PFLU_4406	-4.6886	2.25436e-12
PFLU_3942	-4.49934	6.2933e-13
PFLU_3943	-4.68321	4.49612e-12
PFLU_0748	-4.5832	7.94128e-14
PFLU_4435	-4.67867	6.64764e-13
PFLU_5174	-3.58881	2.43713e-10
PFLU_0508	-4.6416	5.45451e-13
PFLU_5891	-4.56547	7.12595e-14
PFLU_0064	-4.64874	3.22948e-13
PFLU_4377	-4.17588	6.95126e-09
PFLU_4734	-4.62545	2.72652e-12
PFLU_4419	-4.62537	7.41216e-13
PFLU_3424	4.29107	1.08635e-06
PFLU_3269	4.42953	2.68853e-10
PFLU_4437	-4.60936	8.03729e-13
PFLU_4427	-4.60919	8.03729e-13
PFLU_4438	-4.56579	1.09863e-12
PFLU_0186	4.58489	3.63611e-10
PFLU_0637	-4.58073	7.12595e-14
PFLU_3444	-4.57471	5.3285e-13
PFLU_5090	-4.43268	4.80406e-11
PFLU_0747	-4.50139	8.74172e-14
PFLU_5270	4.19453	1.2699e-12
PFLU_4436	-4.40081	8.43676e-13
PFLU_3270	4.31487	7.21748e-09
PFLU_2545	-4.03584	6.65556e-13
PFLU_3354	-4.33898	8.13512e-12
PFLU_3105	-4.50971	1.1512e-13
PFLU_5957	-4.41442	8.0071e-12
PFLU_0988	3.95686	2.68365e-07
PFLU_4382	4.18916	1.76103e-11
PFLU_1150	3.20543	1.56877e-10
PFLU_5093	-4.49396	2.9196e-12
PFLU_0063	-4.49059	1.83254e-13
PFLU_3516	3.96078	2.61311e-11
PFLU_3668	2.89283	0.00323927
PFLU_4446	-4.45379	2.10513e-12
PFLU_4418	-4.43968	4.25952e-13
PFLU_4568	-3.52826	0.000223332
PFLU_4766	-4.19864	4.9029e-10
PFLU_5176	-4.14649	1.00331e-08
PFLU_3289	4.39901	2.46038e-09
PFLU_4426	-4.38702	9.62507e-13
PFLU_1813	-4.387	4.86533e-09
PFLU_0059	-4.36936	2.32418e-12
PFLU_5036	-3.88868	1.60738e-10
PFLU_4732	-4.20338	7.12595e-14
PFLU_0750	-4.14848	2.00031e-13
PFLU_6022	2.39909	0.00062551
PFLU_4609	3.85944	7.24212e-08
PFLU_4988	4.33322	3.02252e-12
PFLU_0534	4.3209	7.50523e-13
PFLU_0533	4.30071	1.72425e-12
PFLU_0061	-4.29818	1.48146e-12
PFLU_5454	4.27231	5.1711e-08
PFLU_0065	-4.29437	1.86928e-12
PFLU_3904	-4.28626	1.97826e-12
PFLU_1348	-4.18834	6.19918e-12
PFLU_0702	2.82231	2.24455e-06
PFLU_4272	3.70152	7.7355e-05
PFLU_4420	-4.25205	1.0834e-12
PFLU_0984	3.97607	1.00719e-06
PFLU_0380	-4.19485	2.3195e-10
PFLU_0703	3.61849	6.38454e-09
PFLU_2318	-4.01321	9.36874e-10
PFLU_4439	-4.19263	1.6838e-12
PFLU_3742	-3.92926	2.05684e-10
PFLU_5625	-4.215	3.27703e-12
PFLU_3425	3.96549	1.65862e-07
PFLU_3091	0.0930235	0.80198
PFLU_2916	3.55892	1.14069e-09
PFLU_0698	2.05034	0.004179
PFLU_2544	-3.76787	8.52544e-10
PFLU_2319	-3.83867	5.73827e-10
PFLU_2321	-3.52525	4.50557e-10
PFLU_5322	-4.13958	1.95367e-11
PFLU_1152	4.11619	3.52282e-12
PFLU_5483	-2.40865	0.0274378
PFLU_4384	3.30996	1.51466e-10
PFLU_0066	-4.11107	8.08825e-13
PFLU_1321	-4.10381	1.17856e-11
PFLU_5556	-4.09911	3.52282e-12
PFLU_0963	-3.93967	1.08944e-11
PFLU_0645	-4.07129	1.08944e-11
PFLU_3940	-4.06831	3.52282e-12
PFLU_2039	-4.06439	1.07666e-11
PFLU_2317	-3.85165	1.63468e-10
PFLU_0817	-3.96391	1.21234e-12
PFLU_5730	-4.01565	2.65885e-12
PFLU_0362	-3.87471	6.86428e-12
PFLU_0979	3.53355	7.06522e-07
PFLU_2035	-4.01678	5.05727e-11
PFLU_5860	-3.89468	1.9687e-11
PFLU_3278	4.00809	1.20726e-09
PFLU_1132	-3.9922	8.66373e-12
PFLU_0060	-3.99012	1.67643e-12
PFLU_4440	-3.98987	7.72562e-11
PFLU_4191	-3.73979	4.86449e-12
PFLU_4277	3.89882	6.65556e-13
PFLU_5859	3.69968	7.78671e-11
PFLU_1905	3.97986	1.67859e-05
PFLU_4424	-3.60049	3.86192e-10
PFLU_2316	-3.85915	4.30227e-11
PFLU_5513	3.9706	4.86449e-12
PFLU_3766	-3.5349	1.896e-11
PFLU_2696	-3.8946	5.09993e-12
PFLU_5225	-3.95772	8.03729e-13
PFLU_0058	-3.92431	2.53527e-12
PFLU_5582	-3.95248	1.13953e-11
PFLU_4423	-3.85684	4.43113e-11
PFLU_5761	3.93647	3.45344e-12
PFLU_5216	3.34298	1.29391e-10
PFLU_2154	3.82562	4.10161e-11
PFLU_0642	-3.92888	1.0834e-12
PFLU_3156	3.92822	2.71491e-08
PFLU_1757	-3.91463	3.22948e-13
PFLU_2919	-3.30465	1.08249e-12
PFLU_4422	-3.90336	1.21928e-11
PFLU_1131	-3.72766	1.13953e-11
PFLU_0648	-3.86231	1.85762e-12
PFLU_2003	-3.8332	3.73122e-10
PFLU_3001	2.02845	2.89506e-06
PFLU_1100	-3.85644	6.39436e-12
PFLU_3163	3.85486	1.98953e-10
PFLU_2264	-3.42635	7.10847e-11
PFLU_3941	-3.84894	9.18902e-13
PFLU_5479	3.54326	6.30792e-10
PFLU_6042	-3.78546	3.89615e-13
PFLU_0636	-3.84577	2.13059e-11
PFLU_6076	2.95288	1.58473e-07
PFLU_4554	-0.186827	0.87203
PFLU_3090	0.158861	0.70658
PFLU_1906	3.83694	1.56137e-07
PFLU_4987	3.82653	2.94868e-11
PFLU_5226	-3.81915	7.76009e-12
PFLU_1363	2.38831	3.45827e-08
PFLU_1907	3.81401	1.30926e-07
PFLU_1908	3.80652	4.86582e-11
PFLU_0986	3.5572	4.60227e-06
PFLU_5487	3.55109	2.04559e-09
PFLU_0893	3.79647	3.24906e-11
PFLU_5639	2.08515	0.00381514
PFLU_2920	-3.00817	2.56023e-10
PFLU_4388	-3.04021	2.40949e-08
PFLU_2802	-3.25746	1.87969e-10
PFLU_2038	-3.56337	7.61046e-10
PFLU_0535	3.76708	1.67633e-12
PFLU_4972	-3.76625	6.65556e-13
PFLU_0085	3.30303	8.47585e-12
PFLU_5170	3.76288	1.38285e-11
PFLU_4708	3.74766	1.85807e-08
PFLU_2320	-3.1265	2.05036e-08
PFLU_2792	3.64184	4.53241e-09
PFLU_3630	-3.50457	1.8122e-12
PFLU_2586	3.54441	8.81758e-09
PFLU_2730	-2.34843	8.76764e-06
PFLU_0644	-3.74773	4.14579e-11
PFLU_1490	3.68351	4.91566e-11
PFLU_5386	2.70069	6.99282e-11
PFLU_5334	-3.73865	6.41454e-13
PFLU_1042	-1.4503	0.000575774
PFLU_0091	3.52875	2.15494e-09
PFLU_0980	3.3739	2.49742e-06
PFLU_4428	-3.68311	4.55103e-12
PFLU_0875	-2.83242	1.72447e-09
PFLU_1547	3.62505	1.14685e-11
PFLU_2558	-3.52265	9.08139e-11
PFLU_1486	-3.56272	1.77373e-09
PFLU_0755	-3.59236	1.04397e-12
PFLU_0787	-3.13664	0.000361398
PFLU_0657	3.41333	2.10566e-10
PFLU_5535	3.68293	3.89615e-13
PFLU_5536	3.67136	1.29248e-12
PFLU_1439	3.36459	1.02196e-08
PFLU_1151	-2.29799	2.98916e-08
PFLU_0973	-2.87026	2.64125e-05
PFLU_5980	3.65623	2.37484e-11
PFLU_5359	-3.35719	1.88601e-10
PFLU_0118	-3.22195	7.30668e-10
PFLU_2963	3.5117	1.00441e-06
PFLU_0403	3.58036	8.94364e-11
PFLU_2729	-2.75338	8.36405e-10
PFLU_4293	-3.10227	4.30912e-10
PFLU_4378	-3.30685	1.34386e-08
PFLU_0876	-2.96442	1.05296e-08
PFLU_0639	-3.60839	9.10013e-12
PFLU_1026	-2.68978	1.19421e-05
PFLU_0646	-3.59858	2.24394e-11
PFLU_3482	-3.59507	4.87346e-12
PFLU_5729	-3.1597	8.8817e-11
PFLU_6136	3.59144	1.54349e-11
PFLU_2075	-3.54369	3.08201e-11
PFLU_4374	-3.58425	6.24663e-09
PFLU_5583	-3.49028	2.10974e-11
PFLU_2078	-3.5608	7.68374e-11
PFLU_3287	2.99395	2.5258e-08
PFLU_5512	3.55415	1.73136e-11
PFLU_4429	-3.48325	8.10627e-13
PFLU_4243	-3.54319	2.40949e-08
PFLU_2153	2.65407	8.98845e-08
PFLU_3989	-3.53508	1.21784e-11
PFLU_1205	-3.52806	5.64611e-12
PFLU_3902	-3.30286	2.76822e-11
PFLU_3736	3.52266	3.33893e-09
PFLU_0982	3.08874	1.46961e-05
PFLU_3410	-3.51403	1.05736e-11
PFLU_0297	3.5103	8.41249e-05
PFLU_2080	-3.49835	3.01203e-12
PFLU_3903	-3.4629	2.42362e-09
PFLU_2694	-3.02652	1.21526e-08
PFLU_1396	-3.48915	4.04544e-12
PFLU_2803	-3.0991	1.62706e-10
PFLU_3734	-3.48214	1.08249e-12
PFLU_5169	3.48208	1.29151e-11
PFLU_3570	2.20047	0.000305848
PFLU_0141	-3.41772	1.29151e-11
PFLU_3562	2.67292	6.70886e-09
PFLU_2921	-2.23116	1.01423e-08
PFLU_5509	3.39049	7.03008e-10
PFLU_2394	-2.95604	3.90619e-09
PFLU_3288	3.19289	4.85057e-08
PFLU_4334	3.23513	3.06622e-06
PFLU_0369	-3.3556	9.08631e-13
PFLU_0651	-3.44885	1.70147e-11
PFLU_0839	3.44526	1.60847e-11
PFLU_2471	-3.26707	6.7408e-10
PFLU_0458	-3.43296	5.80199e-13
PFLU_1025	-2.52036	4.63102e-05
PFLU_4736	-3.42345	1.65932e-11
PFLU_1136	-3.33854	4.57963e-12
PFLU_2077	-3.42258	1.71283e-11
PFLU_4883	-3.41979	9.21786e-13
PFLU_0370	-3.38118	2.63991e-13
PFLU_2470	-3.3756	1.53871e-09
PFLU_4425	-3.20481	2.81114e-11
PFLU_5511	3.36969	2.11706e-10
PFLU_0575	2.82223	5.24432e-11
PFLU_1604	-3.00961	1.00015e-08
PFLU_0361	-3.26894	3.53353e-10
PFLU_0062	-3.36288	1.95367e-11
PFLU_1649	3.36261	1.21201e-11
PFLU_0765	3.35209	2.23787e-10
PFLU_5858	3.35782	8.68427e-09
PFLU_2081	-3.14015	1.11246e-10
PFLU_0641	-3.12592	1.03593e-08
PFLU_2058	-2.16461	2.52285e-06
PFLU_5115	2.09968	5.98794e-05
PFLU_3280	3.24204	5.47076e-09
PFLU_5567	-3.31771	8.29793e-12
PFLU_1364	1.95038	2.21636e-06
PFLU_2616	-3.30037	2.84884e-13
PFLU_5584	-3.2986	1.16525e-11
PFLU_3089	0.915738	0.00152192
PFLU_0367	-3.29363	2.9196e-12
PFLU_5324	-3.25954	9.41875e-13
PFLU_3220	-2.78472	2.16098e-09
PFLU_1250	-3.20275	1.08296e-11
PFLU_5979	3.28791	8.36405e-10
PFLU_1756	-3.28762	2.45467e-10
PFLU_5532	3.28362	6.39436e-12
PFLU_2040	-3.28298	4.24408e-10
PFLU_5215	2.77722	1.17152e-08
PFLU_2074	-3.27783	2.1126e-11
PFLU_3219	-2.82491	6.7408e-10
PFLU_2036	-3.27432	5.34702e-11
PFLU_2979	3.27294	4.44986e-09
PFLU_3092	0.150572	0.547166
PFLU_0089	3.06686	3.07674e-06
PFLU_5141	2.92309	1.70785e-10
PFLU_2658	-3.26304	1.51229e-11
PFLU_5171	3.25129	5.09326e-12
PFLU_0351	3.24712	4.21715e-07
PFLU_3130	-3.0066	8.37823e-07
PFLU_0987	2.69038	6.10933e-06
PFLU_4305	0.382206	0.52832
PFLU_4810	-3.23959	1.90885e-11
PFLU_3362	3.22818	7.813e-13
PFLU_5644	2.57854	8.41507e-09
PFLU_2757	3.17766	1.08998e-08
PFLU_2951	2.96174	1.96951e-09
PFLU_4615	-2.46537	1.00142e-07
PFLU_4958	3.20856	5.82609e-09
PFLU_4991	3.05481	2.32843e-08
PFLU_2535	2.43668	0.00800856
PFLU_2224	-3.1847	1.01357e-09
PFLU_0067	-3.15775	2.79912e-12
PFLU_2326	-2.70248	1.51378e-06
PFLU_0676	-3.18372	1.38094e-09
PFLU_5255	3.16362	4.64827e-10
PFLU_5525	3.17782	8.98675e-11
PFLU_5510	3.17679	2.55682e-11
PFLU_5538	3.17329	5.80199e-13
PFLU_2726	-2.75189	5.962e-11
PFLU_5526	3.16533	1.53962e-10
PFLU_0818	-3.16451	1.95367e-11
PFLU_0915	-2.83303	1.53087e-12
PFLU_2323	-2.6874	4.40917e-08
PFLU_3906	-3.08333	1.76324e-11
PFLU_4400	-3.11015	6.31758e-13
PFLU_4989	2.88927	5.00377e-11
PFLU_4644	-3.13743	1.0046e-11
PFLU_0994	-3.13605	3.06169e-10
PFLU_4555	0.185253	0.891612
PFLU_1578	3.13475	1.84982e-12
PFLU_0952	-3.06779	9.52833e-11
PFLU_2302	-3.11872	6.65556e-13
PFLU_0542	-3.11688	9.08631e-13
PFLU_0649	-2.91338	2.05406e-07
PFLU_5565	-3.11287	7.76009e-12
PFLU_1270	3.11099	2.81517e-11
PFLU_1101	-3.10739	1.52817e-09
PFLU_4387	-2.79104	1.80751e-09
PFLU_1575	3.10511	1.54462e-11
PFLU_2543	-2.42493	2.15227e-08
PFLU_3905	-3.01649	5.66708e-12
PFLU_0294	-3.09578	3.51544e-09
PFLU_4610	2.68259	9.4332e-06
PFLU_5488	2.8624	1.66469e-08
PFLU_5528	3.08904	2.3821e-09
PFLU_3359	-3.07479	3.47628e-11
PFLU_2288	1.61422	1.56388e-05
PFLU_1138	-3.04662	3.81091e-12
PFLU_5480	2.74488	8.10674e-09
PFLU_5481	2.73183	3.33893e-09
PFLU_5089	-2.93173	1.84462e-08
PFLU_2561	2.45352	0.019821
PFLU_3107	3.0648	9.85253e-07
PFLU_0924	-3.05495	1.52289e-08
PFLU_1423	3.00356	2.51841e-09
PFLU_5431	-2.82258	3.27571e-11
PFLU_0675	-3.05268	7.24727e-10
PFLU_4714	3.05264	1.94321e-10
PFLU_5527	3.04924	6.41312e-10
PFLU_0909	-2.98593	2.06457e-08
PFLU_1914	-2.92151	1.72585e-12
PFLU_0365	-2.93182	5.24199e-12
PFLU_2531	2.81012	8.59809e-08
PFLU_6135	3.03926	4.73697e-11
PFLU_5802	3.03441	2.19122e-09
PFLU_3487	-3.03446	3.38043e-11
PFLU_2647	-3.0333	1.37988e-11
PFLU_2529	2.8643	9.50108e-08
PFLU_2066	-3.02898	8.27834e-12
PFLU_3435	3.02797	2.37422e-09
PFLU_2076	-2.97945	2.53358e-10
PFLU_4292	-2.55163	2.90505e-09
PFLU_4151	3.02112	5.32485e-10
PFLU_0638	-3.02059	2.15231e-10
PFLU_4614	-2.92621	1.9687e-11
PFLU_1090	3.01875	7.30706e-10
PFLU_5247	-2.86354	5.64611e-12
PFLU_4443	-2.93396	1.46836e-12
PFLU_0327	3.01326	6.88676e-11
PFLU_1137	-2.96469	9.12641e-11
PFLU_2055	1.39363	8.10587e-05
PFLU_5731	-2.76861	8.27334e-08
PFLU_4819	-3.00408	2.38605e-11
PFLU_5010	2.99921	1.63319e-11
PFLU_5033	2.99683	4.57265e-10
PFLU_1351	-2.99609	1.06264e-06
PFLU_4053	2.99586	5.10488e-07
PFLU_5566	-2.87141	2.09906e-11
PFLU_0760	2.98617	6.784e-10
PFLU_1919	2.86873	5.83042e-10
PFLU_5774	2.98218	8.55609e-08
PFLU_2888A	-2.9388	8.12016e-08
PFLU_1566	2.97379	8.27834e-12
PFLU_0754	-2.97337	1.28924e-10
PFLU_1213	-2.97259	1.77528e-10
PFLU_4737	-2.96733	8.0071e-12
PFLU_4383	2.44692	2.00633e-09
PFLU_3336	-2.95594	4.54988e-10
PFLU_4918	2.93222	7.6786e-10
PFLU_0569	-2.65128	6.43636e-11
PFLU_0923	-2.94414	3.01993e-09
PFLU_5789	-2.94387	1.69023e-10
PFLU_0981	2.66082	2.40319e-05
PFLU_5156	-2.82093	1.96797e-09
PFLU_0650	-2.60772	1.98092e-08
PFLU_1648	2.93171	2.06719e-11
PFLU_1502	-2.52351	3.85625e-11
PFLU_4707	2.93027	6.81933e-07
PFLU_3619	-1.7157	0.00200533
PFLU_4081	2.92705	5.83015e-08
PFLU_2079	-2.89646	5.69845e-12
PFLU_2324	-2.312	1.5043e-06
PFLU_2573	2.62658	8.44921e-08
PFLU_5728	-2.81237	6.93375e-10
PFLU_1249	-2.90913	1.0136e-10
PFLU_5268	2.85904	3.35161e-10
PFLU_3816	-2.90498	1.16323e-12
PFLU_3881	-2.90208	2.5943e-10
PFLU_2605	2.83233	2.68076e-07
PFLU_0840	2.89249	2.0736e-10
PFLU_3733	-2.63005	1.75581e-10
PFLU_5140	2.81853	1.28397e-05
PFLU_2222	-2.44639	4.39286e-07
PFLU_0176	2.88639	2.25517e-05
PFLU_0598	-2.83621	2.06334e-09
PFLU_5013	2.88091	4.81053e-11
PFLU_2037	-2.88005	2.05563e-09
PFLU_5564	-2.82763	3.90804e-12
PFLU_0697	1.41259	0.000543984
PFLU_2930	2.32847	3.20427e-06
PFLU_0352	-2.87592	1.40312e-10
PFLU_5075	2.41873	2.97401e-09
PFLU_3677	2.37844	2.18332e-07
PFLU_2127	2.86452	3.35559e-08
PFLU_3854	-2.45862	2.71491e-08
PFLU_4212	2.56361	0.000474261
PFLU_0621	-2.73625	6.84121e-10
PFLU_5522	2.80892	1.40312e-10
PFLU_0366	-2.84345	1.00151e-11
PFLU_3787	-2.84338	1.03335e-09
PFLU_0167	-2.26582	8.32166e-09
PFLU_0135	-2.56748	1.71897e-09
PFLU_6041	2.22384	2.48252e-07
PFLU_2072	-2.83369	2.32823e-09
PFLU_0681	2.77762	7.72857e-07
PFLU_4709	2.82777	1.20726e-09
PFLU_5519	2.68608	1.55812e-10
PFLU_1251	-2.73289	1.84205e-10
PFLU_5626	-2.81325	4.62246e-12
PFLU_5427	2.81215	3.28901e-11
PFLU_0451	-2.61688	1.76618e-07
PFLU_0565	2.80946	6.07148e-07
PFLU_0699	1.57599	0.00122136
PFLU_1202	-2.67389	3.85625e-11
PFLU_5047	-2.64615	1.05513e-11
PFLU_1365	1.7873	2.9441e-06
PFLU_0315	-1.55497	5.06226e-06
PFLU_6109	-2.57018	2.77728e-10
PFLU_6023	1.06203	0.0230014
PFLU_0948	-2.47905	4.64827e-10
PFLU_0985	2.47821	1.07585e-05
PFLU_6006	0.63357	0.0014574
PFLU_6025	0.693407	0.00622209
PFLU_0541	-2.78688	1.20066e-09
PFLU_2106	-1.50168	0.000368726
PFLU_5220	2.77714	1.40312e-10
PFLU_2053	2.533	1.13371e-08
PFLU_3184	2.20621	5.73896e-07
PFLU_0551	-2.77524	6.37007e-10
PFLU_0643	-2.77327	9.68971e-10
PFLU_0441	1.93674	7.6195e-08
PFLU_1252	-2.77206	9.77907e-09
PFLU_5967	-2.76982	3.71043e-10
PFLU_5138	2.40145	1.25328e-06
PFLU_5829	2.76469	1.2608e-10
PFLU_4397	-2.76275	8.36405e-10
PFLU_2367	2.76093	5.18664e-08
PFLU_5508	2.75643	2.68901e-10
PFLU_3674	1.85545	0.00211561
PFLU_0983	2.58653	2.09274e-05
PFLU_0662	2.75075	1.79391e-10
PFLU_5503	2.709	1.40019e-10
PFLU_4925	-2.74856	6.97212e-09
PFLU_5524	2.72498	1.88873e-09
PFLU_0543	-2.74087	6.26363e-11
PFLU_4811	-2.74008	2.66885e-10
PFLU_2547	-1.98572	6.57213e-06
PFLU_4117	-2.73151	9.2466e-10
PFLU_1877	2.7311	9.99542e-08
PFLU_5044	2.72763	9.872e-11
PFLU_2327	-2.35775	8.49728e-07
PFLU_1522	2.58924	1.07953e-08
PFLU_4366	-2.72095	4.84842e-07
PFLU_0690	-2.71932	2.85966e-07
PFLU_1576	2.71746	7.62925e-11
PFLU_0756	-2.57452	3.45344e-12
PFLU_5489	2.38395	5.08339e-08
PFLU_5518	2.66862	6.7408e-10
PFLU_1349	-2.66884	1.77373e-09
PFLU_0554	-2.71231	4.29638e-10
PFLU_0171	-2.61769	1.92499e-10
PFLU_6053	-2.70625	1.68768e-09
PFLU_5529	2.70324	5.19705e-11
PFLU_0572	-2.69786	8.82453e-10
PFLU_5523	2.66622	1.66469e-08
PFLU_5773	2.69704	3.13611e-09
PFLU_5076	2.31439	3.13611e-09
PFLU_2710	-2.33049	1.10304e-08
PFLU_3764	-2.69527	5.55085e-11
PFLU_1710	-2.64182	2.5544e-12
PFLU_2030	-2.69386	4.48185e-10
PFLU_4623	2.43167	5.17059e-07
PFLU_5249	2.49115	1.6609e-10
PFLU_1224	-2.60404	1.98953e-10
PFLU_5537	2.68578	1.21355e-11
PFLU_3388	-2.4242	1.44612e-09
PFLU_1027	-1.89312	3.34907e-07
PFLU_0516	-2.68157	2.70228e-11
PFLU_6021	0.715565	0.00470901
PFLU_5531	2.67674	8.97968e-12
PFLU_2163	-1.95969	6.37123e-07
PFLU_3048	-1.79837	0.000204766
PFLU_3271	2.52426	2.35399e-08
PFLU_5530	2.67394	3.53768e-11
PFLU_1010	-2.41219	3.33397e-10
PFLU_2309	2.33246	8.83001e-06
PFLU_5790	-2.67318	1.73417e-11
PFLU_0555	-2.67312	4.84753e-10
PFLU_5012	2.67311	6.81444e-11
PFLU_4741	2.37765	4.01818e-06
PFLU_4459	-2.66581	3.57594e-08
PFLU_6108	-2.66291	4.81053e-11
PFLU_3662	2.00664	2.00263e-06
PFLU_4643	-2.66006	7.43357e-10
PFLU_5539	2.65976	3.70994e-11
PFLU_4035	-2.65965	1.21928e-11
PFLU_6014	0.808446	0.0285074
PFLU_3583	-2.34355	2.5131e-08
PFLU_2601	2.65692	0.000410376
PFLU_6097	-2.65503	6.74419e-10
PFLU_0328	2.65443	4.29075e-09
PFLU_0688	-2.65365	8.86159e-12
PFLU_5972	2.16035	0.000287445
PFLU_1041	-1.37956	3.09904e-05
PFLU_0753	-2.64916	3.07554e-10
PFLU_3498	2.6491	0.00646789
PFLU_3584	-2.32647	1.14083e-07
PFLU_3426	2.15658	8.10429e-06
PFLU_2128	2.64428	3.32308e-10
PFLU_0826	-2.48604	3.58509e-09
PFLU_0090	2.34526	1.85529e-06
PFLU_0187	2.64292	7.81073e-10
PFLU_1353	-2.63608	2.12116e-10
PFLU_0764	2.63601	4.12811e-11
PFLU_2126	-1.88971	0.00100194
PFLU_0520	-2.47394	8.9594e-11
PFLU_0308	-2.60871	1.8313e-10
PFLU_2218	-2.19457	1.3883e-09
PFLU_4396	-2.6204	2.13059e-11
PFLU_2591	2.35416	3.26788e-07
PFLU_5788	-2.61712	1.26728e-09
PFLU_5034	2.61698	1.22483e-10
PFLU_3635	2.61672	1.69725e-09
PFLU_4240	-2.61498	3.77222e-09
PFLU_2971	-2.51201	8.76061e-10
PFLU_4780	2.47537	8.18925e-08
PFLU_5361	-2.21859	6.784e-10
PFLU_5521	2.5473	1.11086e-10
PFLU_1709	-2.60597	1.47499e-10
PFLU_3040	-2.60523	5.42978e-10
PFLU_3108	2.60468	1.25743e-07
PFLU_3014	-2.4605	5.73827e-10
PFLU_1995	2.15211	2.00562e-08
PFLU_0684	2.59813	1.51821e-08
PFLU_1000	-2.59377	5.56062e-09
PFLU_3631	-1.86783	1.34884e-05
PFLU_5078	2.59279	5.56258e-08
PFLU_5014	2.505	2.76053e-10
PFLU_5593	-2.57746	3.85941e-11
PFLU_3221	-2.58983	2.62156e-07
PFLU_4190	-2.56717	8.70781e-12
PFLU_5504	2.54435	2.13065e-11
PFLU_4717	-2.24005	1.60109e-07
PFLU_3711	2.58381	1.24178e-05
PFLU_1255	-2.52567	2.69707e-09
PFLU_4267	1.93449	0.000217929
PFLU_1070	2.08597	1.73797e-08
PFLU_4433	-2.57991	2.0736e-10
PFLU_0940	-2.13917	4.24395e-06
PFLU_5604	2.5788	0.000118233
PFLU_3982	-2.57651	1.59116e-07
PFLU_0647	-2.57612	1.05231e-10
PFLU_3582	-2.29724	4.86336e-08
PFLU_3188	2.572	3.04305e-07
PFLU_5118	2.3678	1.48391e-09
PFLU_0170	-2.56805	1.61553e-10
PFLU_2151	-2.56441	3.7102e-09
PFLU_2325	-2.09986	8.61873e-06
PFLU_1432	-2.56167	9.45761e-11
PFLU_3599	2.51729	1.64248e-08
PFLU_3356	-2.56074	5.5693e-10
PFLU_5333	-2.56073	3.88303e-11
PFLU_6134	2.47354	3.41451e-10
PFLU_2368	2.56003	8.74461e-08
PFLU_5173	2.48325	4.48185e-10
PFLU_4458	-2.08649	4.19506e-07
PFLU_5502	2.55722	2.71964e-11
PFLU_5346	-2.52391	8.28049e-11
PFLU_5383	-2.31312	2.10659e-06
PFLU_3808	-2.55239	6.02039e-10
PFLU_4198	-2.45875	2.06328e-10
PFLU_5568	-2.5472	4.6063e-11
PFLU_1685	-2.54142	2.60843e-07
PFLU_0146	-2.21098	5.30911e-08
PFLU_0951	-2.36509	1.40374e-10
PFLU_1512	-2.42366	4.01023e-09
PFLU_0084	2.16456	1.49799e-10
PFLU_6020	0.778213	0.0108084
PFLU_5252	2.52997	1.1425e-09
PFLU_2900	2.52848	8.16806e-07
PFLU_3833	2.21737	2.92981e-06
PFLU_3275	2.24272	4.31042e-06
PFLU_3650	-2.52244	2.5718e-09
PFLU_1702	-2.51843	1.40176e-07
PFLU_5507	2.49542	4.38591e-10
PFLU_5486	2.2931	1.32392e-08
PFLU_5505	2.51567	2.13059e-11
PFLU_5432	-2.48631	2.09922e-10
PFLU_2648	-2.49657	1.1902e-09
PFLU_4319	-2.33046	1.63319e-11
PFLU_1717	-2.50411	1.04199e-10
PFLU_3136	-2.504	8.2112e-10
PFLU_2987	2.50252	2.02793e-07
PFLU_2452	0.870525	0.0401759
PFLU_1225	-2.42699	8.86486e-11
PFLU_5254	2.4992	4.01778e-10
PFLU_4901	2.4983	6.2341e-10
PFLU_4116	-2.49765	2.6928e-10
PFLU_1368	-2.49633	8.58824e-12
PFLU_5335	-2.45705	4.62519e-11
PFLU_4205	2.16478	3.20249e-09
PFLU_5548	2.48386	3.68051e-10
PFLU_0949	-2.32252	5.54753e-09
PFLU_0255	2.48218	4.42023e-07
PFLU_5795	2.48056	4.53241e-09
PFLU_0943	-2.19279	7.30668e-10
PFLU_5520	2.45129	3.85625e-11
PFLU_0405	2.47755	2.20028e-10
PFLU_3192	-2.47663	1.05069e-08
PFLU_5256	1.97931	2.39169e-08
PFLU_1789	-2.47448	1.23012e-11
PFLU_4933	2.47202	1.9958e-11
PFLU_2791	-0.771943	0.0439698
PFLU_4460	-2.46236	6.6016e-08
PFLU_0392	-2.46585	4.86673e-10
PFLU_0945	-2.21231	9.10706e-10
PFLU_3515	-2.29553	8.98362e-08
PFLU_3291	2.35473	3.77439e-07
PFLU_3682	2.41271	5.05012e-07
PFLU_5501	2.45254	2.43581e-11
PFLU_0728	2.10328	9.15205e-07
PFLU_5724	2.43087	1.02585e-11
PFLU_4746	-2.45121	1.39968e-08
PFLU_0683	2.45052	3.51632e-11
PFLU_4325	-2.44989	3.56597e-06
PFLU_4499	2.44964	1.26289e-09
PFLU_4076	2.18151	0.00263
PFLU_2706	-2.44323	6.76696e-10
PFLU_5516	2.44679	9.94765e-11
PFLU_3272	2.13307	2.74003e-06
PFLU_1643	2.44388	1.47259e-10
PFLU_4320	2.13856	4.37071e-08
PFLU_5540	2.44274	5.97157e-11
PFLU_3678	2.01222	2.02568e-05
PFLU_2045	-1.80543	1.07541e-05
PFLU_5772	2.44144	7.68792e-08
PFLU_3306	-1.73261	1.60319e-06
PFLU_1140	-2.43982	1.67168e-09
PFLU_2915	1.99265	8.36235e-10
PFLU_0691	-2.43891	1.95367e-11
PFLU_1302A	2.43498	8.76061e-10
PFLU_5139	2.20722	1.0768e-05
PFLU_2617	-2.43375	1.09039e-09
PFLU_1524	-2.43337	7.40887e-12
PFLU_1133	-2.43328	2.92826e-07
PFLU_0368	-2.43133	1.47633e-10
PFLU_4622	2.43076	4.8693e-07
PFLU_4249	-2.43026	5.38666e-10
PFLU_5968	-2.42883	2.25513e-09
PFLU_4207	2.33675	3.86589e-11
PFLU_5430	-2.42677	5.06938e-08
PFLU_3568	-1.8402	2.25513e-09
PFLU_2970	-1.94074	3.55878e-06
PFLU_4579	-2.42353	9.06637e-10
PFLU_5590	2.4224	8.93846e-09
PFLU_1163	2.34637	8.87114e-08
PFLU_2307	1.98772	3.82622e-06
PFLU_0519	-2.35804	1.12853e-09
PFLU_5544	-2.11221	9.09264e-09
PFLU_3970	2.07937	4.12164e-06
PFLU_3901	-2.41358	5.10383e-11
PFLU_4517	2.39993	1.0474e-06
PFLU_3049	-2.11048	7.64652e-09
PFLU_4461	1.67128	5.31e-07
PFLU_0039	-2.40396	4.5156e-09
PFLU_0011	2.40213	1.19729e-09
PFLU_0553	-2.40085	1.01991e-09
PFLU_1139	-2.20169	1.71751e-10
PFLU_2530	2.21336	1.35734e-07
PFLU_1594	-2.39617	9.76475e-08
PFLU_3389	-2.395	3.03096e-09
PFLU_5726	2.12044	1.06469e-10
PFLU_1319	-2.39377	1.98947e-09
PFLU_4701	2.39284	2.4533e-10
PFLU_2071	-2.39279	2.9836e-10
PFLU_4995	1.96375	3.40817e-07
PFLU_1903A	2.34503	5.0409e-06
PFLU_2382	2.38983	1.92732e-10
PFLU_1825	2.3893	4.29057e-08
PFLU_3390	-2.38686	7.15298e-09
PFLU_0903	2.38453	1.03712e-09
PFLU_4432	-2.38173	1.37203e-10
PFLU_3675	1.93533	0.000171232
PFLU_3874	2.2898	3.59294e-06
PFLU_2454	0.700041	0.0741923
PFLU_2953	-2.35964	4.87537e-08
PFLU_3443	-2.37821	8.24357e-08
PFLU_3204	-2.37641	2.39169e-08
PFLU_4321	2.10579	1.30804e-07
PFLU_3380	-2.36951	8.36998e-10
PFLU_5344	-2.32397	5.30823e-10
PFLU_3405	2.16714	9.61521e-10
PFLU_0731	2.34312	8.39346e-10
PFLU_1787	-2.36268	6.7178e-09
PFLU_1433	-2.13351	2.97401e-09
PFLU_6085	2.00527	4.78551e-07
PFLU_0704	-2.0375	2.38969e-07
PFLU_0614	2.35547	2.2692e-10
PFLU_2152	-2.35432	3.28592e-08
PFLU_0926	-2.35277	1.63352e-09
PFLU_0603	2.1418	3.99095e-08
PFLU_5506	2.30399	1.72039e-10
PFLU_1816	2.3502	1.31229e-10
PFLU_1050	2.14985	9.25183e-08
PFLU_0475	2.34512	1.0136e-10
PFLU_0017	2.34248	1.30629e-08
PFLU_5330	2.34238	3.33893e-09
PFLU_0956	-2.34105	2.93488e-10
PFLU_2246	2.11048	4.15946e-05
PFLU_1271	2.33998	1.11636e-10
PFLU_0319	-2.05986	5.07873e-09
PFLU_5345	-2.27712	8.564e-10
PFLU_5725	1.86994	3.49612e-09
PFLU_2813	2.33545	3.77439e-07
PFLU_1086	-2.33536	3.65704e-10
PFLU_3529	2.10824	2.63187e-06
PFLU_2587	-2.33448	1.63768e-08
PFLU_5253	2.3321	1.46208e-11
PFLU_0040	-2.32655	1.70204e-10
PFLU_2159	-2.3264	5.5693e-10
PFLU_5935	-2.32496	2.29021e-09
PFLU_4097	-2.32441	6.21678e-08
PFLU_0659	-2.3241	8.27834e-12
PFLU_5009	2.32269	1.09241e-09
PFLU_0942	-2.06748	1.83693e-08
PFLU_2220	-1.92585	4.44986e-09
PFLU_0709	-2.2644	2.63555e-09
PFLU_5886	2.26928	1.56205e-07
PFLU_5613	-2.28274	3.38712e-09
PFLU_2133	2.31718	1.67502e-06
PFLU_5823	2.31653	8.2797e-08
PFLU_4054	2.31484	1.12492e-05
PFLU_4664	-2.31469	4.67137e-10
PFLU_4010	-2.30338	1.77692e-10
PFLU_3334	2.26481	6.74007e-09
PFLU_3276	2.07008	6.12699e-07
PFLU_2271	-2.30911	1.66783e-11
PFLU_3616	1.86282	1.58473e-07
PFLU_0147	1.73202	8.27537e-06
PFLU_1788	-2.2371	6.72595e-09
PFLU_4742	2.0605	6.52941e-06
PFLU_3795	2.30171	3.41142e-07
PFLU_5514	2.00312	1.84042e-07
PFLU_0076	2.3014	1.75629e-08
PFLU_0447	-1.80843	1.94782e-06
PFLU_0364	-2.18803	2.2331e-09
PFLU_0342	1.95893	8.91804e-08
PFLU_5500	-2.29354	1.71738e-09
PFLU_0201	2.19704	0.000917904
PFLU_4833	1.97126	3.89574e-06
PFLU_3413	-1.1118	0.0324176
PFLU_3719	2.29082	8.4784e-05
PFLU_1920	2.11876	1.16605e-08
PFLU_5866	1.39155	0.000498833
PFLU_2073	-2.2829	2.20753e-09
PFLU_5517	2.28113	3.63611e-10
PFLU_5251	2.27853	9.91995e-11
PFLU_4862	-2.26421	5.30774e-10
PFLU_4668	2.27734	4.33461e-07
PFLU_1831	1.90908	3.36918e-09
PFLU_5571	-2.09257	6.66726e-10
PFLU_1570	-2.26003	6.24739e-10
PFLU_0737	2.27439	7.35115e-10
PFLU_1886	-2.27247	4.07834e-09
PFLU_0612	2.21843	4.22567e-08
PFLU_0556	-1.88171	3.80898e-09
PFLU_5596	-2.24138	3.44839e-09
PFLU_4738	-2.12202	9.15535e-10
PFLU_4694	-2.24309	4.64827e-10
PFLU_1040	-1.85582	1.31229e-10
PFLU_4099	-2.25894	1.12115e-07
PFLU_0611	2.04566	9.95346e-09
PFLU_5764	1.78277	9.88485e-07
PFLU_1682	2.25236	4.77416e-06
PFLU_1307	-2.23129	4.08277e-09
PFLU_1492	2.25487	2.54746e-09
PFLU_3079	-2.25399	1.60108e-08
PFLU_6067	-2.25137	5.05549e-08
PFLU_5673	0.846855	0.00042395
PFLU_4026	-1.62392	3.88918e-06
PFLU_6057	2.25159	9.28607e-06
PFLU_1853	-2.24205	1.58093e-07
PFLU_6027	-0.142998	0.805175
PFLU_0946	-1.89589	2.59373e-08
PFLU_5218	1.94282	5.32485e-10
PFLU_5410	2.21061	1.54827e-09
PFLU_0788	-1.72383	0.00194259
PFLU_2474	0.674169	0.0763846
PFLU_5900	2.24222	5.75036e-09
PFLU_1067	2.24082	3.68034e-07
PFLU_1491	2.24016	4.08986e-09
PFLU_0950	-2.06264	1.35219e-09
PFLU_3165	2.03126	3.13266e-09
PFLU_4559	-2.17559	1.39608e-10
PFLU_2788	-0.765401	0.00322866
PFLU_2466	2.02638	3.07954e-08
PFLU_4004	-1.59947	1.96304e-05
PFLU_4905	2.06556	2.5136e-09
PFLU_5134	1.89531	1.69779e-05
PFLU_5557	-2.22098	3.64459e-11
PFLU_6110	-2.22055	2.8263e-10
PFLU_3177	2.11735	1.24994e-09
PFLU_0863	1.99856	3.88955e-09
PFLU_5248	1.74016	3.23606e-06
PFLU_0877	-2.10013	6.47867e-09
PFLU_5017	2.20492	2.13184e-10
PFLU_5801	2.2046	2.53121e-08
PFLU_5144	1.22395	0.00559417
PFLU_0340	1.82991	1.24189e-06
PFLU_1278	1.73444	5.23892e-09
PFLU_0625	2.20189	5.1374e-07
PFLU_1046	-1.64442	0.000307389
PFLU_1866	2.01288	3.44992e-08
PFLU_1817	2.1891	1.11156e-08
PFLU_2028	2.1976	1.8941e-07
PFLU_2180	-2.19629	7.312e-09
PFLU_4626	1.31311	0.000921069
PFLU_0895	2.19213	1.03349e-10
PFLU_5896	-1.32542	1.48233e-05
PFLU_2776	-1.41374	0.00909205
PFLU_3199	-1.76212	0.000157309
PFLU_4098	-2.19054	2.41947e-08
PFLU_2571	-1.57083	7.95392e-07
PFLU_3446	2.18718	0.00924595
PFLU_0482	2.18656	5.06716e-10
PFLU_2272	-2.18625	1.03349e-10
PFLU_3462	-2.18613	3.60383e-09
PFLU_3286	1.66867	4.09616e-06
PFLU_3786	2.18436	3.72619e-10
PFLU_5961	2.18364	3.78173e-07
PFLU_2922	-1.77609	8.11132e-09
PFLU_5200	1.92475	0.000399046
PFLU_3123	1.78294	9.21579e-06
PFLU_0592	-2.1798	2.17792e-06
PFLU_4104	-2.17941	1.83539e-09
PFLU_0682	2.17932	2.53802e-08
PFLU_4560	-2.06554	2.53929e-08
PFLU_5765	1.72058	9.23716e-07
PFLU_5395	2.1763	5.50274e-06
PFLU_5628	-1.07999	3.93502e-05
PFLU_5470	2.17549	3.56031e-11
PFLU_6024	0.441687	0.200517
PFLU_1134	-1.83472	8.18925e-08
PFLU_1003	-2.17301	1.67596e-09
PFLU_3813	2.17252	4.13282e-09
PFLU_2651	2.17237	1.87392e-06
PFLU_3041	-2.10896	2.0736e-10
PFLU_5241	2.17102	4.66134e-08
PFLU_2724	-2.15172	4.10093e-08
PFLU_4103	-2.16761	7.11516e-11
PFLU_1436	-2.16623	1.37047e-09
PFLU_1299	2.16401	1.12888e-07
PFLU_0267	2.16109	3.13611e-09
PFLU_4395	-2.16034	8.94364e-11
PFLU_3129	-2.13467	1.00179e-07
PFLU_4170	2.15969	1.70114e-05
PFLU_0528	-1.50274	2.01686e-06
PFLU_0742	1.81128	1.12638e-05
PFLU_0010	2.15816	9.5606e-10
PFLU_5965	-2.15741	4.84436e-11
PFLU_6018	1.57852	4.85951e-06
PFLU_4326	2.03016	3.23606e-06
PFLU_3981	-2.1534	7.89382e-07
PFLU_5845	-2.15306	4.22216e-10
PFLU_5292	2.15295	3.34365e-07
PFLU_2642	2.15258	1.07989e-07
PFLU_5843	-2.15116	1.71751e-10
PFLU_3805	-2.15048	3.70841e-08
PFLU_0680	2.15015	1.39651e-09
PFLU_4399	2.07433	1.16513e-08
PFLU_5966	-2.01695	1.98444e-09
PFLU_2057	-1.58939	5.05849e-06
PFLU_2427	2.14647	7.61045e-07
PFLU_3747	-2.14544	7.78108e-10
PFLU_5841	-2.1426	5.24614e-09
PFLU_0028	-2.10986	3.22792e-10
PFLU_4625	1.26491	0.000923859
PFLU_4306	-2.06791	3.93944e-07
PFLU_0283	2.13787	5.54753e-09
PFLU_6086	1.92736	0.000901559
PFLU_0142	-2.13508	8.26775e-11
PFLU_1867	2.13293	2.46139e-10
PFLU_3567	-1.99912	1.36214e-09
PFLU_5822	-2.1281	7.8823e-09
PFLU_1002	-2.12799	5.98095e-09
PFLU_0563	0.952714	0.0102684
PFLU_0894	2.12668	6.66726e-10
PFLU_1305	2.12563	2.93969e-05
PFLU_4556	-0.130279	0.849703
PFLU_0914	-2.12442	1.93591e-10
PFLU_1052	2.12431	3.03615e-10
PFLU_5595	-1.94589	3.87102e-09
PFLU_6121	1.2121	2.28242e-07
PFLU_5545	-1.44424	6.17891e-08
PFLU_5137	1.76319	6.13181e-05
PFLU_3073	-2.11913	1.17027e-07
PFLU_5713	2.11696	5.21428e-09
PFLU_3533	0.886675	0.0191059
PFLU_5534	2.11221	1.0501e-10
PFLU_6079	-1.93922	5.16662e-10
PFLU_2674	2.10919	6.12544e-10
PFLU_1107	2.10858	1.11581e-09
PFLU_0338	2.10711	4.61639e-08
PFLU_3195	-0.0295847	0.938211
PFLU_0181	-1.99642	1.10522e-08
PFLU_2725	-2.10557	7.73691e-07
PFLU_4786	-1.95836	1.01717e-08
PFLU_6015	0.184364	0.56443
PFLU_4294	-1.32737	6.77021e-08
PFLU_2160	-2.10225	6.04068e-09
PFLU_0939	-1.73485	1.50281e-06
PFLU_0465	1.72644	7.23303e-06
PFLU_0029	-2.08231	9.49529e-09
PFLU_4595	-2.09913	1.16941e-10
PFLU_0905	2.09805	2.76447e-09
PFLU_2120	2.09227	1.51279e-06
PFLU_4891	-1.07716	0.0601023
PFLU_2548	-2.09728	1.5479e-05
PFLU_0487	2.09698	3.59367e-09
PFLU_1161	2.0958	1.07731e-09
PFLU_4038	-2.094	6.81059e-09
PFLU_5146	-2.07649	2.24475e-05
PFLU_5349	1.71936	6.23149e-06
PFLU_5515	2.04644	1.00886e-08
PFLU_2912	1.8083	3.52219e-06
PFLU_3868	1.58169	0.00102855
PFLU_0761	2.09064	1.8325e-10
PFLU_3200	-0.50972	0.119464
PFLU_3122	1.60846	8.26881e-07
PFLU_3135	-2.08993	6.07513e-08
PFLU_5250	1.94219	4.33594e-05
PFLU_5403	2.01193	7.00822e-06
PFLU_4885	1.49401	2.89005e-05
PFLU_4685	1.98887	1.52929e-08
PFLU_5026	2.08173	8.64387e-07
PFLU_0664	2.07818	4.13776e-06
PFLU_5777	1.78759	1.46051e-07
PFLU_4345	2.07776	5.44592e-09
PFLU_1664	-2.07248	2.06089e-09
PFLU_1776	-2.00638	7.36773e-08
PFLU_4695	-1.98976	3.01325e-09
PFLU_1049	2.0702	1.20777e-07
PFLU_5007	2.06907	1.8325e-10
PFLU_4273	1.61978	0.00168024
PFLU_0780	2.06874	8.88925e-09
PFLU_1714	2.06741	1.1522e-09
PFLU_1671	-2.06709	1.04965e-08
PFLU_6026	0.647507	0.00381514
PFLU_3748	-2.04479	6.6642e-10
PFLU_0225	-1.54343	2.41277e-05
PFLU_5816	1.79985	1.09426e-06
PFLU_2555	-1.63811	3.85627e-05
PFLU_5607	-2.0607	6.21208e-06
PFLU_3173	1.7928	4.75827e-05
PFLU_1035	-1.55753	1.24904e-06
PFLU_4624	1.38918	0.000481006
PFLU_2266	-2.05659	1.46323e-09
PFLU_1450	1.92746	1.32136e-06
PFLU_0767	2.05508	8.15352e-09
PFLU_5433	-1.93769	3.1374e-09
PFLU_1653	1.5468	0.000176386
PFLU_3759	1.43065	1.5053e-05
PFLU_6039	-2.02089	9.1193e-10
PFLU_0938	-1.64086	3.63031e-05
PFLU_5612	-2.03166	5.73228e-09
PFLU_5704	-2.04859	8.05754e-09
PFLU_4764	2.04709	1.48551e-05
PFLU_5872	-1.94597	8.28027e-10
PFLU_2473	0.51709	0.110276
PFLU_1998	1.60585	4.10093e-08
PFLU_5011	2.04526	4.56568e-09
PFLU_3153	1.90899	5.97026e-06
PFLU_4507	2.04368	5.24009e-10
PFLU_5099	1.30296	0.0050973
PFLU_1206	-2.04082	3.43983e-06
PFLU_5952	1.04282	0.000190523
PFLU_1069	1.62167	2.92949e-06
PFLU_2290	-1.94388	1.88131e-10
PFLU_3798	1.93251	3.5856e-07
PFLU_0144	-2.03313	1.0323e-09
PFLU_1220	-1.61076	7.80764e-06
PFLU_4795	-1.82895	7.304e-08
PFLU_4096	-2.02713	6.17513e-08
PFLU_0899	-1.96986	4.20735e-10
PFLU_4645	-1.98478	3.28835e-09
PFLU_1654	1.5091	9.73103e-05
PFLU_1558	2.02458	2.70228e-11
PFLU_6007	0.923652	5.62794e-05
PFLU_4362	-2.02447	6.7408e-10
PFLU_3224	-1.90264	1.85437e-09
PFLU_2364	1.39791	0.000665108
PFLU_0103	1.74845	1.03012e-05
PFLU_1493	2.01806	2.45179e-07
PFLU_4593	-2.01139	2.9836e-10
PFLU_1715	1.14205	0.0144687
PFLU_2843	-1.63799	3.49651e-06
PFLU_4806	1.66153	1.75889e-05
PFLU_4329	-2.0085	1.1486e-05
PFLU_4627	0.967551	0.0129205
PFLU_2223	-1.60949	1.49114e-07
PFLU_3623	2.00832	8.18057e-08
PFLU_1126	-1.91568	4.84766e-08
PFLU_0143	-2.00607	1.5605e-09
PFLU_6082	-1.97976	4.07482e-09
PFLU_1818	2.0049	1.64248e-08
PFLU_1215	-1.64647	4.39619e-06
PFLU_3198	-0.211065	0.580313
PFLU_1055	2.00303	2.27253e-08
PFLU_4558	-1.90694	3.38074e-10
PFLU_6019	0.337828	0.279086
PFLU_2981	-1.97448	6.91228e-10
PFLU_5411	1.65186	5.87981e-08
PFLU_5994	1.99579	6.7408e-10
PFLU_1369	-1.99522	3.09269e-10
PFLU_2777	1.99318	1.64051e-07
PFLU_5003	1.68533	3.35826e-06
PFLU_0343	-1.99195	4.50163e-08
PFLU_3561	1.59226	0.000129488
PFLU_2677	1.96537	4.89613e-07
PFLU_2303	-1.80486	2.16921e-08
PFLU_3952	-1.46564	0.000685612
PFLU_0145	-1.98732	4.13282e-09
PFLU_1999	1.30411	2.68076e-07
PFLU_0031	1.81381	9.76895e-08
PFLU_0838	1.98286	2.40738e-09
PFLU_2322	-1.98231	1.26395e-08
PFLU_5267	1.8189	7.54701e-08
PFLU_1864	1.97965	8.43498e-07
PFLU_1747	-1.93612	3.64459e-11
PFLU_4009	-1.97737	2.13744e-10
PFLU_4861	-1.97621	2.0736e-10
PFLU_1114	-1.90936	4.20735e-10
PFLU_5276	1.93404	1.54268e-07
PFLU_1704	1.97542	1.0294e-09
PFLU_3695	0.667182	0.258787
PFLU_1413	-1.39831	0.00131643
PFLU_3320	1.80231	0.0018554
PFLU_3391	-1.9748	3.33812e-08
PFLU_2385	-1.59873	0.000211199
PFLU_0253	1.97433	0.000116995
PFLU_1216	1.2183	2.97763e-06
PFLU_0481	1.97323	1.61187e-09
PFLU_3363	1.97128	9.12641e-11
PFLU_3551	-1.97068	7.64614e-09
PFLU_4592	-1.97045	2.95287e-10
PFLU_2244	1.60425	1.97158e-05
PFLU_3753	1.96926	7.82705e-08
PFLU_4634	1.72795	4.22144e-06
PFLU_5273	1.96882	6.05406e-10
PFLU_5371	-1.9675	1.99803e-09
PFLU_2123	-1.90745	5.83015e-08
PFLU_1092	1.90313	0.0164762
PFLU_1854	-1.63648	1.18748e-05
PFLU_3987	-1.85594	1.80591e-05
PFLU_5732	-1.95566	2.9731e-09
PFLU_6008	1.1605	1.35355e-05
PFLU_5844	-1.96295	7.04293e-10
PFLU_5995	1.96234	3.13603e-09
PFLU_4665	-1.96161	9.87498e-09
PFLU_5766	1.92061	1.32517e-07
PFLU_3086	1.45578	7.91731e-06
PFLU_4796	-1.76632	1.69888e-08
PFLU_0277	1.41154	3.37412e-07
PFLU_0825	-1.86613	8.59628e-08
PFLU_4666	-1.95583	6.51946e-08
PFLU_2108	-1.95518	1.63435e-10
PFLU_3585	-1.9549	4.3929e-08
PFLU_0538	1.95473	5.22416e-10
PFLU_3620	1.54756	0.0486513
PFLU_4561	-1.89467	2.29021e-09
PFLU_4316	-1.95272	1.45379e-05
PFLU_4794	-1.51674	0.00230574
PFLU_3174	1.95164	8.18654e-06
PFLU_0862	1.86341	1.78359e-08
PFLU_4748	1.65307	1.15735e-07
PFLU_3431	1.55555	0.000179531
PFLU_0867	-1.88796	1.09266e-09
PFLU_4261	1.46191	7.60096e-05
PFLU_1477	1.94521	1.14242e-09
PFLU_0180	-1.59302	7.61923e-08
PFLU_2618	-1.94399	2.59575e-07
PFLU_3315	1.37456	0.00114972
PFLU_5996	1.94249	1.29609e-09
PFLU_5209	-1.8074	4.6858e-09
PFLU_1146	1.81897	9.19548e-10
PFLU_2359	1.94079	6.26739e-07
PFLU_3225	-1.91337	5.05062e-09
PFLU_5533	1.93937	1.08125e-09
PFLU_5857	1.93834	1.03585e-05
PFLU_4594	-1.93824	4.59503e-10
PFLU_4475	1.73748	2.655e-07
PFLU_1434	1.33181	0.00622209
PFLU_5149	-1.93653	1.2984e-05
PFLU_2607	1.7092	8.17232e-05
PFLU_5917	-0.970241	4.03335e-05
PFLU_5119	1.9336	8.66948e-07
PFLU_3024	1.65261	1.9576e-07
PFLU_0329	1.74669	3.39073e-05
PFLU_2562	1.93268	0.00800239
PFLU_1683	1.8891	1.23447e-05
PFLU_6060	-1.93011	6.98693e-08
PFLU_1209	-1.92991	2.56749e-08
PFLU_5211	-1.77164	3.13105e-09
PFLU_3693	-1.41166	1.93523e-06
PFLU_1571	-1.90023	7.43357e-10
PFLU_0913	-1.92669	1.74096e-08
PFLU_3975	-1.57932	2.59801e-06
PFLU_1935	1.2594	0.206629
PFLU_3676	1.13327	0.000900151
PFLU_2745	-1.92349	5.05012e-07
PFLU_1370	-1.92346	5.07168e-10
PFLU_2301	1.20285	1.46862e-05
PFLU_2332	1.10694	0.00376902
PFLU_2221	-1.67263	5.97872e-07
PFLU_1292	-1.91592	2.77787e-07
PFLU_0166	-1.91403	2.24249e-07
PFLU_4270	1.66432	4.88821e-05
PFLU_0568	1.6742	1.17837e-06
PFLU_0020	-1.80415	3.00538e-09
PFLU_0947	-1.77903	8.18925e-08
PFLU_1996	1.70412	2.93741e-06
PFLU_0075	1.90929	5.11542e-08
PFLU_6017	1.11774	1.39921e-05
PFLU_3097	-0.563187	0.00644646
PFLU_4266	1.30102	0.0204406
PFLU_4825	-1.90464	1.09039e-09
PFLU_4275	1.17769	0.00168388
PFLU_1596	-1.90404	1.49037e-06
PFLU_1226	1.90278	1.57854e-08
PFLU_3684	-1.82784	1.01423e-08
PFLU_0476	1.90213	4.44514e-08
PFLU_2996	1.79286	1.26538e-05
PFLU_1260	-1.83842	8.55427e-09
PFLU_2162	-1.78661	5.47077e-07
PFLU_1261	-1.78406	9.40937e-09
PFLU_1476	1.90045	1.88785e-08
PFLU_4256	-1.82798	1.23334e-07
PFLU_2572	-1.74805	2.04267e-08
PFLU_0768	1.89784	3.88414e-09
PFLU_0770	1.83731	4.36994e-08
PFLU_6016	0.130619	0.72164
PFLU_5555	1.68914	6.83085e-06
PFLU_1045	-1.27847	0.00320132
PFLU_5474	1.89641	1.87929e-07
PFLU_3740	-1.78148	4.3929e-08
PFLU_4268	1.38053	0.00371824
PFLU_5469	1.87538	1.20364e-07
PFLU_4860	-1.89422	6.3596e-11
PFLU_1102	-1.82371	7.15448e-08
PFLU_4588	-1.84209	1.63435e-10
PFLU_0712	-1.58231	0.00391261
PFLU_4313	1.86573	4.26176e-09
PFLU_0105	1.89023	6.23149e-06
PFLU_5024	1.89	4.72117e-06
PFLU_0757	-1.4255	4.93492e-05
PFLU_3513	1.88767	2.13025e-08
PFLU_6075	1.88922	2.12514e-08
PFLU_5771	1.7467	2.03621e-05
PFLU_1254	-1.87299	1.21689e-09
PFLU_0139	-1.88721	7.90976e-10
PFLU_3194	-0.250841	0.454565
PFLU_1807	-1.72683	5.56927e-05
PFLU_5043	1.88433	2.49836e-10
PFLU_5372	-1.87691	2.00265e-09
PFLU_3087	1.34017	6.20058e-05
PFLU_0561	0.699595	0.0518096
PFLU_3925	1.41594	6.99549e-08
PFLU_3096	-0.577799	0.00296342
PFLU_1592	1.57885	0.000900151
PFLU_5846	-1.87808	6.3119e-08
PFLU_3749	-1.31541	5.33177e-06
PFLU_5831	1.64964	9.55946e-07
PFLU_1105	1.46572	3.93537e-07
PFLU_5309	-1.87207	3.21794e-09
PFLU_4830	-1.87096	4.28633e-07
PFLU_2962	1.86598	0.00243597
PFLU_4578	1.86496	8.52544e-10
PFLU_5219	1.86215	2.53929e-08
PFLU_0932	1.51049	1.56623e-07
PFLU_3707	-1.86084	4.37225e-06
PFLU_5780	1.86067	1.34041e-09
PFLU_0034	1.3717	3.55688e-05
PFLU_5421	1.81406	7.67703e-08
PFLU_1614	1.28746	0.000289044
PFLU_4309	-1.47937	4.90576e-05
PFLU_3852	-1.56588	1.00068e-05
PFLU_4674	1.60276	0.000727471
PFLU_0113	1.85519	1.65563e-08
PFLU_4522	1.69417	4.74146e-07
PFLU_5684	1.74801	4.40552e-07
PFLU_3036	-1.8504	1.74891e-08
PFLU_2267	-1.85031	4.06443e-09
PFLU_1478	1.84803	4.0549e-09
PFLU_1565	1.84793	1.2953e-08
PFLU_0927	-1.84782	1.06218e-09
PFLU_1223	-1.76853	1.1673e-08
PFLU_5482	1.40747	2.32932e-05
PFLU_2635	1.63641	1.35119e-05
PFLU_3767	1.0961	0.00570256
PFLU_2027	1.34279	7.06522e-07
PFLU_1601	-1.8453	7.64614e-09
PFLU_5736	-1.84502	7.69342e-07
PFLU_0227	1.84496	3.54552e-05
PFLU_3958	-1.3758	0.000460966
PFLU_5678	-1.84455	6.3727e-08
PFLU_4036	0.865352	0.00249112
PFLU_2599	1.7605	0.00343708
PFLU_5062	-1.70495	4.24986e-08
PFLU_4898	-1.78686	2.03457e-10
PFLU_6120	1.04562	3.323e-06
PFLU_3098	-0.288527	0.185961
PFLU_5735	-1.83487	3.81855e-07
PFLU_3412	-1.83446	4.06897e-07
PFLU_2980	-1.6452	1.34483e-07
PFLU_0488	1.75166	0.0020427
PFLU_0485	-1.75694	3.07515e-09
PFLU_3690	-1.3474	0.000279393
PFLU_2793	1.73992	1.4197e-07
PFLU_1246	-1.67962	3.75325e-07
PFLU_4772	1.82931	2.67046e-08
PFLU_0800	-1.82911	8.69242e-09
PFLU_0928	-1.64526	2.69228e-07
PFLU_2964	1.73052	0.00288524
PFLU_0976	1.18315	3.3363e-05
PFLU_1211	-1.7821	1.43189e-07
PFLU_4188	1.8259	3.59613e-08
PFLU_5842	-1.82561	1.90099e-08
PFLU_5938	1.81877	2.23825e-06
PFLU_4855	1.65679	4.66779e-08
PFLU_2486	-1.78452	1.30908e-08
PFLU_1291	1.71428	1.37765e-08
PFLU_3317	1.3043	0.000186131
PFLU_1308	-1.76378	2.55814e-09
PFLU_2150	-1.81741	7.5593e-08
PFLU_3491	1.03269	0.00515348
PFLU_1374	-1.81238	6.00548e-08
PFLU_3374	-1.81179	4.87531e-07
PFLU_2984	1.71637	4.10221e-07
PFLU_3965	-1.7964	2.41659e-07
PFLU_3721	1.52403	0.000543984
PFLU_0339	1.50033	2.46584e-05
PFLU_0266	1.80668	5.03261e-10
PFLU_2991A	1.80623	5.01548e-10
PFLU_1309	-1.80489	5.06841e-08
PFLU_3977	-0.979482	0.00234595
PFLU_3661	1.31034	0.000978053
PFLU_0112	1.65479	3.24402e-05
PFLU_5332	-1.76748	2.23403e-08
PFLU_0455	1.64389	3.53854e-08
PFLU_0593	-1.61287	7.92854e-08
PFLU_4324	-1.68391	0.000490804
PFLU_4926	1.67524	1.1351e-06
PFLU_2564	-1.80107	1.79317e-06
PFLU_5973	1.79183	5.97872e-07
PFLU_6055	1.79968	2.02242e-07
PFLU_1806	1.79931	5.61534e-06
PFLU_3216	-1.79905	7.98371e-05
PFLU_2956	1.63854	0.04064
PFLU_0311	1.7988	3.5856e-07
PFLU_3653	-1.76057	2.71729e-08
PFLU_2070	-1.76755	7.31351e-08
PFLU_2425	-1.4575	0.000205614
PFLU_3617	1.1911	0.00021585
PFLU_2433	-0.822083	0.000311844
PFLU_0941	-1.55558	2.48252e-07
PFLU_0815	1.79606	0.000119993
PFLU_4564	-1.78002	1.52289e-08
PFLU_1976	-1.5038	2.55125e-06
PFLU_1389	1.68781	4.72786e-06
PFLU_3488	-1.71029	3.00538e-09
PFLU_1793	-1.49299	7.08961e-07
PFLU_0307	0.671219	0.100666
PFLU_0071	1.62306	1.94264e-05
PFLU_4476	-1.56914	1.53997e-06
PFLU_2850	-1.78552	0.00036411
PFLU_3574	-1.01686	0.00131938
PFLU_4064	-0.723409	0.267657
PFLU_0400	1.78273	5.77227e-06
PFLU_0831	-1.5922	7.68049e-08
PFLU_0016	1.64708	5.02699e-07
PFLU_3226	-1.62526	4.05675e-07
PFLU_1419	-1.49844	7.72255e-06
PFLU_0934	1.71379	0.000729557
PFLU_3197	-0.596391	0.184478
PFLU_5217	1.76399	6.24955e-08
PFLU_0158	1.77852	0.00796258
PFLU_3894	-1.62266	7.68049e-08
PFLU_3501	-1.77751	5.20046e-05
PFLU_4211	1.77731	1.52929e-08
PFLU_3930	1.73287	5.91138e-09
PFLU_3951	-1.39444	2.21636e-06
PFLU_1759	-1.71041	1.49404e-09
PFLU_1001	-1.77312	3.44674e-08
PFLU_3141	-1.54396	5.63963e-08
PFLU_1666	-1.77132	3.55783e-09
PFLU_3085	1.09631	0.000357371
PFLU_5350	1.49387	1.44364e-05
PFLU_4603	1.76688	5.59188e-09
PFLU_3476	0.673713	0.00677365
PFLU_3658	1.15859	0.000113858
PFLU_3353	-1.60006	8.70274e-09
PFLU_4769	-1.60108	7.83182e-05
PFLU_5352	-1.76258	7.83033e-09
PFLU_3277	1.57798	1.68852e-07
PFLU_4947	-1.63205	3.88496e-05
PFLU_1539	1.44779	3.13102e-06
PFLU_1758	1.62801	0.00054936
PFLU_0591	-1.40063	0.000146051
PFLU_4749	1.38963	3.62644e-08
PFLU_0873	-0.941584	0.00139278
PFLU_0531	-1.67905	8.76852e-09
PFLU_0776	-0.93308	3.39557e-05
PFLU_1253	-1.69009	1.76238e-09
PFLU_0295	-1.66116	7.25568e-07
PFLU_2043	-1.11615	0.00420336
PFLU_0954	0.761675	0.0162527
PFLU_2723	-1.32146	3.73127e-07
PFLU_4500	1.74929	2.48372e-07
PFLU_4863	-1.74874	5.34316e-07
PFLU_3613	1.59392	6.3969e-06
PFLU_4519	1.5278	1.5222e-06
PFLU_3305	-1.06741	0.000294959
PFLU_1519	1.72225	6.74411e-08
PFLU_5796	-1.65335	2.86087e-08
PFLU_3615	1.42453	2.30298e-05
PFLU_2550	-1.34678	0.000454041
PFLU_5027	1.741	3.14614e-06
PFLU_3393	-1.73557	4.40451e-07
PFLU_3793	1.66887	0.000128389
PFLU_5257	1.57243	1.65356e-06
PFLU_0590	-1.36234	0.000234087
PFLU_3510	-1.7338	5.95668e-08
PFLU_5611	-1.69217	2.98434e-09
PFLU_0093	1.73377	2.68159e-06
PFLU_3335	-1.73375	6.28369e-08
PFLU_5847	-1.73224	9.84627e-07
PFLU_4135	1.10516	0.0658746
PFLU_2443	1.24198	0.000216006
PFLU_4380	1.20718	1.12283e-06
PFLU_3614	1.47429	7.93803e-05
PFLU_5229	-1.63052	8.16806e-07
PFLU_0148A	1.63894	0.0149549
PFLU_2086	-1.69681	1.39771e-10
PFLU_1878	1.72911	7.17756e-07
PFLU_1665	-1.72771	2.96684e-07
PFLU_1066	1.72579	2.09576e-05
PFLU_0191	-1.72572	4.18279e-08
PFLU_2371	1.72396	2.14228e-06
PFLU_1767	1.70075	2.80983e-08
PFLU_6122	0.985663	1.63957e-06
PFLU_3633	-0.706142	0.000463884
PFLU_0837	1.65972	2.51235e-09
PFLU_0467	1.12326	0.00124726
PFLU_3301	1.71926	1.14573e-08
PFLU_3134	1.6221	1.71414e-06
PFLU_3316	1.18376	7.94736e-05
PFLU_0944	-1.53093	2.32423e-07
PFLU_1896	1.30742	4.49226e-05
PFLU_4682	1.54623	1.63164e-07
PFLU_5162	1.64411	1.55469e-08
PFLU_2082	-1.45563	1.88759e-06
PFLU_2219	-1.29959	4.06124e-06
PFLU_1823	1.42924	1.01645e-07
PFLU_3160	1.3065	9.62471e-07
PFLU_2804	-1.53802	2.98916e-08
PFLU_1265	1.71003	2.80353e-07
PFLU_2304	-1.70974	1.6892e-09
PFLU_4523	1.69291	4.44914e-08
PFLU_1015	-1.4003	0.00119104
PFLU_2331	0.562808	0.0800191
PFLU_2546	-1.44407	6.07513e-08
PFLU_4649	-1.7061	0.00187058
PFLU_0850	1.16324	0.00032882
PFLU_0713	-1.51254	0.00100659
PFLU_0325	-1.63788	1.06173e-07
PFLU_4322	1.48258	1.35442e-05
PFLU_3414	-1.52663	9.75743e-07
PFLU_0562	0.676448	0.0249945
PFLU_3445	-0.966156	0.000206395
PFLU_3640	1.59684	5.40378e-05
PFLU_4745	-1.25676	4.12025e-09
PFLU_6095	1.69469	1.12763e-06
PFLU_5637	1.69209	1.06264e-06
PFLU_5472	1.69398	4.36329e-08
PFLU_1234	1.3686	0.00171338
PFLU_4264	1.52238	0.000417656
PFLU_4787	-1.56917	1.70114e-05
PFLU_2031	-1.63799	1.67516e-07
PFLU_2360	-1.69016	3.0029e-08
PFLU_2178	-1.23345	0.000828756
PFLU_5323	-1.68756	6.47053e-08
PFLU_1448	1.23256	0.00344543
PFLU_1667	-1.59755	1.09263e-07
PFLU_1727	1.55272	0.000180485
PFLU_3964	-1.64425	1.52828e-07
PFLU_5073	1.33432	3.88918e-06
PFLU_1694	-0.825368	0.00363044
PFLU_1827	1.60097	0.000266461
PFLU_5377	1.6819	2.13659e-07
PFLU_2135	1.68075	6.71653e-09
PFLU_2270	-1.53777	4.15459e-09
PFLU_4163	1.68043	1.17023e-06
PFLU_4181	-1.51857	1.08711e-08
PFLU_3535	1.6781	8.18057e-08
PFLU_4890	-0.760418	0.0685326
PFLU_5984	1.47705	3.65934e-05
PFLU_4884	-1.61449	1.27591e-08
PFLU_1726	1.51215	4.07626e-06
PFLU_2621	-1.67475	3.89098e-07
PFLU_1111	-1.4855	8.00085e-07
PFLU_3709	1.49206	4.38446e-07
PFLU_3223	-1.49066	1.5353e-07
PFLU_2676	1.67325	3.13611e-09
PFLU_4389	-1.28802	0.00104635
PFLU_5645	1.56974	2.87283e-05
PFLU_0521	-1.58691	1.70457e-09
PFLU_2654	1.67208	4.75554e-05
PFLU_3588	-1.67199	1.20373e-06
PFLU_2021	-1.54987	1.06842e-06
PFLU_5579	-1.58371	5.07964e-08
PFLU_2824	1.56659	0.00099354
PFLU_1148	-1.49222	0.000319079
PFLU_2242	1.37783	2.01152e-07
PFLU_0495	-1.66612	1.17785e-08
PFLU_0931	-1.66578	1.82641e-08
PFLU_4718	-1.64163	4.54134e-09
PFLU_1720	1.2811	1.37672e-05
PFLU_4274	0.933513	0.0465085
PFLU_1018	-1.66189	3.52708e-09
PFLU_4297	-1.66101	1.59425e-06
PFLU_0109	1.13113	0.0201807
PFLU_4128D	-1.6607	4.50163e-08
PFLU_3545	-1.66068	0.0047449
PFLU_0733	1.58248	4.65125e-06
PFLU_3196	-0.408565	0.234562
PFLU_3806	-1.65889	3.67315e-06
PFLU_0779	1.3823	5.63816e-08
PFLU_0223	-0.556892	0.0504169
PFLU_1881	-1.647	1.0062e-07
PFLU_3050	-0.977833	0.000426569
PFLU_5147	0.389694	0.393694
PFLU_4128C	-1.51458	1.64285e-07
PFLU_2733	-1.39163	6.5572e-08
PFLU_2994	-1.64933	4.48557e-06
PFLU_5434	-1.64917	2.78598e-08
PFLU_3222	-1.19598	1.28982e-05
PFLU_3896	-1.62702	2.39169e-08
PFLU_2731	-1.36625	1.6344e-05
PFLU_3109	1.64536	9.3687e-06
PFLU_3775	-1.26209	2.49848e-06
PFLU_2421	-0.845589	0.0443701
PFLU_0022	1.64463	2.05823e-09
PFLU_1672	-1.64454	2.02555e-07
PFLU_1868	1.37274	5.97177e-07
PFLU_1332	-1.53049	5.21428e-09
PFLU_5314	-1.444	1.21755e-07
PFLU_2698	-0.917864	0.00797687
PFLU_0898	-1.64243	1.49404e-09
PFLU_3387	-1.18918	0.000565528
PFLU_1505	-1.63798	4.91954e-08
PFLU_0240	-0.800364	0.00827897
PFLU_3926	1.58781	1.17027e-07
PFLU_5458	-1.35312	1.55761e-05
PFLU_2568	-1.53224	1.49114e-07
PFLU_1640	1.54157	2.40949e-08
PFLU_5415	-1.63833	4.32729e-09
PFLU_2846	-1.63818	1.71552e-07
PFLU_3946	1.24737	8.76889e-05
PFLU_2620	-1.63635	1.81144e-06
PFLU_2596	1.63444	0.000661638
PFLU_6104	1.63379	1.2882e-07
PFLU_3855	-1.62168	8.02415e-05
PFLU_4122A	1.54743	1.06203e-05
PFLU_2333	0.550564	0.144679
PFLU_0830	-1.63164	5.40787e-07
PFLU_1582	-1.63153	3.12419e-09
PFLU_2164	-1.32373	0.000207472
PFLU_3478	-1.6292	8.15659e-06
PFLU_3873	1.36961	6.44392e-08
PFLU_6013	0.0476991	0.816932
PFLU_3236	1.57472	9.4332e-06
PFLU_5964	-1.57395	4.07011e-09
PFLU_4791	-1.6242	1.81202e-09
PFLU_2737	1.4781	2.03549e-06
PFLU_3265	-1.62285	1.17023e-06
PFLU_0203	1.62272	0.000587016
PFLU_0727	-1.62261	6.67148e-05
PFLU_0527	-1.28991	2.12263e-05
PFLU_1311	-1.62156	1.7592e-07
PFLU_0211	1.53877	1.76496e-07
PFLU_1156	1.55454	2.33762e-08
PFLU_3632	-0.951539	0.00117572
PFLU_0479	1.41549	2.89594e-06
PFLU_0140	-1.6186	1.51261e-09
PFLU_0003	1.6171	7.05214e-08
PFLU_5117	1.55314	0.000607823
PFLU_2766	1.6166	6.24663e-09
PFLU_0634	1.34224	7.31807e-06
PFLU_2721	1.58861	0.00125159
PFLU_3392	-1.61472	3.61702e-08
PFLU_6119	0.795767	5.04272e-06
PFLU_5355	1.58623	1.09364e-08
PFLU_3235	1.23249	0.000802385
PFLU_4193	1.61206	2.56229e-09
PFLU_5710	1.27933	0.0017965
PFLU_0394	-1.61073	3.98111e-08
PFLU_4959	1.61012	3.95923e-07
PFLU_6072	1.60998	9.87281e-06
PFLU_4553	0.271055	0.718774
PFLU_2155	-1.60916	2.25909e-08
PFLU_4074	1.2327	0.0758178
PFLU_4391	-1.50569	2.13316e-08
PFLU_5463	1.57155	3.37575e-05
PFLU_5136	1.13465	0.000108599
PFLU_5025	1.60639	7.79534e-05
PFLU_5712	1.60636	8.62217e-09
PFLU_2449	1.60595	0.000951052
PFLU_1467	1.48682	5.00583e-05
PFLU_4068	-1.05732	0.00151871
PFLU_1608	-1.45573	0.000587016
PFLU_2386	-1.60188	5.82964e-07
PFLU_4808	-1.56645	3.70882e-09
PFLU_4897	-1.53299	7.07643e-07
PFLU_1135	-1.32827	5.89891e-07
PFLU_1214	-1.43742	0.000153759
PFLU_1699	1.59755	9.61734e-08
PFLU_4896	-1.5957	2.9407e-05
PFLU_0663	1.59457	1.10721e-06
PFLU_0213	-0.82447	0.000160861
PFLU_5015	1.5936	1.91406e-06
PFLU_5328	1.5936	4.43737e-06
PFLU_1494	1.5925	1.34531e-05
PFLU_4683	1.53282	5.64873e-06
PFLU_6066	-1.5911	3.57962e-05
PFLU_1300	1.59098	1.21727e-07
PFLU_2047	-1.58994	0.000590925
PFLU_5889	-1.39193	1.0059e-06
PFLU_2675	1.59074	9.82595e-09
PFLU_5603	1.59051	1.39963e-06
PFLU_5338	-1.10086	0.00116161
PFLU_6130	-0.538652	0.020601
PFLU_3155	1.48919	2.83694e-07
PFLU_1612	1.58907	0.00272147
PFLU_3673	1.04418	0.000206169
PFLU_3500	-1.58823	0.000200196
PFLU_0251	1.58818	1.56623e-07
PFLU_2330	-0.746321	0.0609423
PFLU_5189	-1.58614	1.07989e-07
PFLU_4222	-1.58505	2.04707e-05
PFLU_2156	-1.58467	2.60968e-07
PFLU_1606	-1.58369	3.76111e-07
PFLU_4539	1.58365	1.23355e-08
PFLU_3383	1.25741	0.000132525
PFLU_4859	-1.3808	2.87168e-07
PFLU_0265	1.48136	6.1356e-07
PFLU_2870	1.15082	0.000287791
PFLU_1012	0.148406	0.814325
PFLU_5306	1.37971	0.00215218
PFLU_2615	0.374553	0.356655
PFLU_4809	1.5762	5.10184e-07
PFLU_5072	1.57475	2.63687e-08
PFLU_5168	1.57453	3.09714e-09
PFLU_1520	-1.57424	1.48992e-08
PFLU_1940	1.28978	0.000744495
PFLU_4712	1.55687	3.18475e-06
PFLU_5546	1.57233	2.90384e-08
PFLU_4114	1.12358	9.31037e-05
PFLU_2509A	1.30219	0.0034368
PFLU_2256	1.57111	7.56198e-05
PFLU_4611	1.29937	0.00462398
PFLU_4902	1.56809	3.96171e-09
PFLU_0041	1.04073	2.44016e-06
PFLU_2029	-1.5649	2.93447e-07
PFLU_2281	-1.48916	1.03475e-05
PFLU_4966	-0.947453	0.00121641
PFLU_0437	1.37885	2.0833e-07
PFLU_4449	-1.26054	7.99542e-07
PFLU_1212	-1.5619	2.29138e-07
PFLU_0558	1.56149	4.1139e-06
PFLU_2653	1.39341	1.35375e-06
PFLU_1468	1.2423	0.000158354
PFLU_3843	1.42781	0.000294741
PFLU_0183	1.46325	3.41783e-05
PFLU_3512	1.55695	2.06754e-05
PFLU_1824	1.2064	1.16836e-06
PFLU_3033	1.55582	0.00521875
PFLU_1030	-1.43413	2.35983e-07
PFLU_1591A	-1.38586	1.69779e-05
PFLU_3217	-1.40014	3.69353e-05
PFLU_4647	1.33177	5.81954e-07
PFLU_2462	1.55364	0.000292559
PFLU_5223	1.44264	8.18057e-08
PFLU_2136	1.12349	1.15877e-05
PFLU_4980	0.920454	0.00894846
PFLU_1639	1.49957	1.59116e-07
PFLU_0344	-1.5518	4.72482e-08
PFLU_4078	1.51188	0.00703622
PFLU_4296	-1.46923	0.000276192
PFLU_4291	1.28421	0.000261426
PFLU_4904	1.54742	1.30745e-07
PFLU_5782	1.54719	4.04249e-06
PFLU_2969	-1.22644	6.33711e-06
PFLU_0849	1.22017	0.000765696
PFLU_4950	1.3302	4.31098e-07
PFLU_2559	-1.54477	2.24192e-06
PFLU_3750	-0.978147	0.000191177
PFLU_4394	-1.54291	6.87512e-09
PFLU_0640	-1.54188	8.92234e-07
PFLU_1325	1.36545	3.69253e-07
PFLU_3916	1.54047	1.70537e-06
PFLU_6103	1.06179	0.00342679
PFLU_4228	1.17797	7.50061e-05
PFLU_4684	1.38136	1.67502e-06
PFLU_0133	1.18976	7.7851e-06
PFLU_6123	0.941425	8.97966e-06
PFLU_1835	-1.36077	1.91904e-06
PFLU_6051	1.53684	1.30158e-08
PFLU_5707	1.53603	4.33927e-08
PFLU_4515	-1.53585	4.90576e-05
PFLU_1917	1.53585	0.000123749
PFLU_2276	-0.763866	0.17503
PFLU_1145	1.44003	3.05114e-08
PFLU_0616	1.49766	1.38016e-05
PFLU_2886	1.4065	0.0317981
PFLU_3428	-1.53288	3.17665e-07
PFLU_3011	-1.10852	0.00388331
PFLU_4845	0.437636	0.0205911
PFLU_2337	-1.07218	0.000109494
PFLU_3780	1.53135	0.000100922
PFLU_4251	-1.53102	4.53825e-09
PFLU_0407	-1.48816	2.14714e-07
PFLU_3521	-1.52745	2.54105e-07
PFLU_3357	-0.400383	0.403593
PFLU_4091	1.52657	0.000256152
PFLU_2453	0.87999	0.0125919
PFLU_1627	-1.3151	2.55125e-06
PFLU_4160	-1.50259	1.94338e-05
PFLU_1011	-1.25746	0.00111222
PFLU_0137	-1.52466	2.01094e-07
PFLU_4361	-1.52464	2.48252e-07
PFLU_5656	-1.46	1.89711e-07
PFLU_2673	-1.52415	8.71717e-08
PFLU_2034	-1.52381	1.65579e-07
PFLU_3490	1.51495	5.09249e-06
PFLU_6088	0.832238	0.0171827
PFLU_0055	-1.52079	3.65234e-08
PFLU_4003	-1.52021	0.00244041
PFLU_5262	1.52011	5.87607e-08
PFLU_3183	0.873328	0.0090102
PFLU_5311	-1.46617	2.29787e-06
PFLU_5888	-0.865068	0.0330296
PFLU_3203	-1.51765	1.20393e-07
PFLU_5853	1.35201	0.000927345
PFLU_0861	1.5171	1.51775e-08
PFLU_0382	-1.3713	1.1267e-08
PFLU_1473	1.51562	1.47934e-05
PFLU_3888	-1.03821	2.56191e-06
PFLU_1848	-1.51358	1.07335e-08
PFLU_4080	1.51407	4.65358e-05
PFLU_2935	-1.5129	4.07186e-08
PFLU_3148	-1.02258	0.000641529
PFLU_5685	1.4788	6.7781e-08
PFLU_1870	1.49306	6.59732e-06
PFLU_1269	1.51059	2.5432e-08
PFLU_3495	1.51055	0.0329081
PFLU_3084	0.958993	0.0011659
PFLU_2525	0.856896	0.304659
PFLU_6040	-1.50912	4.13215e-06
PFLU_1400	-1.50858	4.08268e-08
PFLU_0288	-1.50768	9.52976e-09
PFLU_5662	0.642858	0.025004
PFLU_2913	1.13417	4.55912e-07
PFLU_4596	-1.4003	7.75643e-07
PFLU_4538	1.5055	9.51303e-08
PFLU_4182	-1.45187	3.55783e-09
PFLU_1367	1.01312	0.000394044
PFLU_3497	1.28929	0.0517987
PFLU_5711	1.5039	2.29906e-06
PFLU_4970	-1.03466	0.00323133
PFLU_6035	1.15706	0.00163429
PFLU_5402	1.39609	6.53908e-08
PFLU_3550	-1.50255	1.49612e-06
PFLU_2582	1.50253	1.93523e-06
PFLU_3861	1.45424	0.000381095
PFLU_0929	-1.39939	7.25568e-07
PFLU_5864	1.49937	2.70625e-06
PFLU_3267	1.34219	0.00164978
PFLU_0559	1.49726	1.55541e-05
PFLU_3774	1.49649	1.07379e-05
PFLU_4686	1.4742	1.1632e-07
PFLU_1449	1.06891	0.000152393
PFLU_3803	-1.49394	5.01516e-06
PFLU_0279	0.569057	0.0803898
PFLU_3218	-1.4103	6.78402e-08
PFLU_4153	-1.05408	0.00208493
PFLU_5575	1.3093	1.87593e-07
PFLU_5160	1.49227	6.31456e-05
PFLU_0222	-0.19761	0.494757
PFLU_1475	1.49204	1.88487e-06
PFLU_0097	-1.14756	0.000517975
PFLU_4075	1.32742	0.0364404
PFLU_0138	-0.765037	0.0764536
PFLU_3477	-1.42453	1.35309e-07
PFLU_4563	-1.4643	3.44998e-08
PFLU_0819	-1.48886	2.05036e-08
PFLU_0095	-1.48872	5.29304e-05
PFLU_1371	-1.48781	7.30356e-08
PFLU_6074	1.4013	2.15399e-07
PFLU_2119	1.22817	0.000151611
PFLU_3900	-1.273	3.27652e-05
PFLU_1472	1.48625	1.41438e-09
PFLU_0205	1.48542	0.000432245
PFLU_5436	-1.3175	0.000122324
PFLU_6124	0.932764	4.33594e-05
PFLU_5419	1.07968	7.54854e-06
PFLU_4047	-1.48381	9.97147e-06
PFLU_2046	-1.11322	0.0298969
PFLU_6037	-1.34501	5.81954e-07
PFLU_5342	-1.12135	7.15191e-06
PFLU_2756	1.48049	1.65915e-05
PFLU_4043	-1.48017	8.74433e-06
PFLU_0700	1.15149	0.031838
PFLU_3502	-1.46183	9.97613e-06
PFLU_1054	1.47941	5.18754e-07
PFLU_5357	-1.38025	0.0024911
PFLU_5404	1.47883	1.07953e-08
PFLU_5591	-1.47881	9.50432e-07
PFLU_1997	1.03922	3.82711e-05
PFLU_1295	1.19702	2.1254e-05
PFLU_5161	1.47842	9.46352e-06
PFLU_4308	-1.42768	3.34374e-07
PFLU_4008	-1.46633	3.01427e-06
PFLU_0502	1.47665	6.07361e-09
PFLU_3538	1.37863	0.0005065
PFLU_2892	-1.11891	9.25551e-07
PFLU_5088	-1.41807	9.95451e-08
PFLU_5785	-1.36874	4.50163e-08
PFLU_5648	0.579618	0.0176931
PFLU_3311	1.47047	1.73899e-07
PFLU_2693	-1.14903	2.06643e-06
PFLU_2109	-1.35146	1.98751e-06
PFLU_0888	1.0677	0.000650145
PFLU_4312	1.46993	1.21075e-08
PFLU_5195	0.64099	0.0114389
PFLU_2787	-0.327082	0.209956
PFLU_1967	1.20298	0.00120977
PFLU_5461	1.27445	9.28607e-06
PFLU_2879	-0.142212	0.727478
PFLU_3814	1.4682	0.00076386
PFLU_5619	1.4665	3.24852e-08
PFLU_2022	-1.46645	6.46015e-08
PFLU_0162	0.751479	0.00259846
PFLU_3398	1.46536	0.0115539
PFLU_0165	1.14349	0.000626509
PFLU_2659	-1.46472	7.83468e-07
PFLU_0136	-1.4282	1.18733e-06
PFLU_0463	1.29069	2.59417e-05
PFLU_5854	1.46184	1.37656e-05
PFLU_4763	1.14135	4.22144e-06
PFLU_1195	-1.33913	5.73228e-09
PFLU_1655	0.653314	0.00434842
PFLU_3470	-1.46017	5.41887e-07
PFLU_4077	1.4595	0.00508655
PFLU_3541	-1.32465	1.07584e-05
PFLU_3882	1.29798	3.05519e-06
PFLU_2353	0.72016	0.000494156
PFLU_2289	0.100239	0.649957
PFLU_2277	-0.838456	0.00220097
PFLU_1528	1.12853	6.11861e-06
PFLU_3966	-1.45599	3.81567e-07
PFLU_5142	0.3798	0.36331
PFLU_0106	1.23898	1.89966e-05
PFLU_0300	-1.45443	2.32391e-06
PFLU_2397	1.15272	4.27053e-05
PFLU_3185	1.34863	1.69694e-05
PFLU_0739	1.45235	2.35584e-08
PFLU_4838	-1.45184	1.60109e-07
PFLU_5337	1.45085	3.17784e-06
PFLU_0448	1.35922	2.38067e-05
PFLU_1451	-1.43611	2.39469e-06
PFLU_3893	-1.43841	1.80689e-07
PFLU_0783	-1.33691	8.36979e-08
PFLU_5492	1.34493	7.49468e-06
PFLU_4032	1.1844	0.00159337
PFLU_0337	1.42601	4.89669e-07
PFLU_5663	0.692967	0.0162059
PFLU_0798	1.19669	1.84495e-05
PFLU_2105	-1.44521	1.32226e-06
PFLU_0953	-1.39996	2.62118e-06
PFLU_2822	1.42401	0.0035349
PFLU_3720	1.2589	0.000340207
PFLU_3071	0.29821	0.266253
PFLU_3921	1.44242	4.69262e-09
PFLU_5384	1.44215	2.2666e-05
PFLU_3563	-1.44206	3.31618e-06
PFLU_1099	-1.40537	1.06411e-05
PFLU_5348	1.24741	0.000347819
PFLU_4667	-1.44087	1.26887e-05
PFLU_5930	-1.29008	1.94039e-07
PFLU_3939	0.939519	0.000512867
PFLU_4331	1.3718	4.72173e-06
PFLU_0617	-0.808792	0.00123072
PFLU_3934	-0.794853	0.056092
PFLU_2844	1.43518	3.89098e-07
PFLU_1219	-1.24093	2.75513e-08
PFLU_0472	1.43458	0.000421318
PFLU_1118	-1.07842	8.76491e-07
PFLU_1921	1.24371	0.00706786
PFLU_4125	-1.43332	3.16337e-05
PFLU_2280	-1.41112	3.69383e-06
PFLU_6073	1.35898	1.45172e-07
PFLU_0013	1.43257	1.07426e-06
PFLU_4837	-1.38653	5.53655e-06
PFLU_3378	-0.471254	0.005572
PFLU_1424	1.14382	3.12239e-06
PFLU_1805	1.43043	9.7059e-07
PFLU_3698	-0.336549	0.209029
PFLU_3403	-1.43028	1.87405e-07
PFLU_1880	-1.26751	2.92949e-06
PFLU_3128	-1.40822	0.000246988
PFLU_4204	1.26691	1.7834e-07
PFLU_0412	1.4268	1.08001e-08
PFLU_2145	1.38923	4.55912e-07
PFLU_0018	1.42643	1.14611e-08
PFLU_5721	1.28791	3.41873e-06
PFLU_1338	-1.42535	1.40326e-05
PFLU_5116	1.06603	0.00213091
PFLU_1447	1.04403	3.91929e-05
PFLU_0270	-1.23795	8.33612e-09
PFLU_2018	-0.958972	0.10905
PFLU_1329	1.42494	2.06982e-06
[truncated: 1,035 more rows]

## Sheet: E
Geneid	control.ti.5dpi.logFC	control.ti.5dpi.FDR
PFLU_2686	9.10642	9.61759e-13
PFLU_1128	-8.43204	9.33537e-10
PFLU_0660	8.31334	2.37159e-10
PFLU_1129	-8.34912	1.288e-10
PFLU_2738	6.94557	1.38985e-10
PFLU_1127	-7.3083	3.16236e-11
PFLU_3106	-7.42428	3.61558e-12
PFLU_3358	-7.01209	3.24419e-13
PFLU_1598	-6.90793	2.35464e-12
PFLU_1577	6.47207	1.01606e-13
PFLU_2054	4.81519	9.59949e-11
PFLU_2295	-6.79505	7.12894e-13
PFLU_0596	-6.78606	2.16972e-11
PFLU_1122	-6.41107	1.73304e-11
PFLU_4818	-6.50151	1.48798e-14
PFLU_2125	-6.43821	7.15055e-13
PFLU_2808	-6.41792	1.90295e-13
PFLU_1123	-6.3505	1.51706e-09
PFLU_1083	-6.54845	3.30365e-11
PFLU_5861	-6.54338	5.8182e-13
PFLU_1082	-6.53895	9.5023e-10
PFLU_4340	-6.45083	2.64657e-12
PFLU_4448	-6.34491	1.02418e-09
PFLU_4728	-6.31088	1.55582e-12
PFLU_0399	5.32176	1.73766e-13
PFLU_1124	-5.1209	1.63895e-08
PFLU_4447	-6.39083	1.09957e-11
PFLU_5038	-5.05661	1.63756e-10
PFLU_2296	-6.14058	8.83219e-13
PFLU_3427	-6.36318	1.35477e-12
PFLU_4730	-6.14574	1.01606e-13
PFLU_4729	-6.26004	1.05398e-12
PFLU_4569	-6.34123	5.11234e-12
PFLU_2262	-6.33828	3.19785e-12
PFLU_3735	-6.09448	2.57463e-12
PFLU_4444	-6.14961	1.22007e-12
PFLU_4733	-6.24558	3.24419e-13
PFLU_5113	4.84471	1.32047e-05
PFLU_5608	-6.2101	7.12894e-13
PFLU_0661	5.59934	1.27065e-08
PFLU_3841	5.82209	4.06219e-10
PFLU_1125	-6.12369	2.44759e-12
PFLU_4414	-6.04036	5.79591e-12
PFLU_0916	-6.02903	1.45298e-12
PFLU_1130	-5.80238	1.69414e-11
PFLU_0566	6.06131	1.73766e-13
PFLU_3765A	-5.90419	1.0067e-13
PFLU_4551	-5.87301	7.45485e-13
PFLU_0595	-6.03171	1.06919e-12
PFLU_4502	5.85476	9.06794e-09
PFLU_5091	-5.96991	2.38966e-11
PFLU_3047	-5.80938	1.10309e-12
PFLU_4452	-5.88718	4.75433e-13
PFLU_1247	-5.91136	1.26719e-12
PFLU_4971	-5.71109	2.61657e-12
PFLU_1155	-5.90261	1.3698e-10
PFLU_1412	-4.78383	0.0019416
PFLU_4451	-5.84216	3.42332e-13
PFLU_0658	5.4707	1.26669e-11
PFLU_4800	5.85196	1.04037e-09
PFLU_3765	-5.70924	5.35814e-13
PFLU_1597	-5.6347	5.48006e-12
PFLU_4455	-5.735	5.39214e-13
PFLU_3409	-5.8113	2.2106e-11
PFLU_0652	1.6856	0.0677596
PFLU_4407	-5.70247	4.13265e-13
PFLU_4731	-5.54221	1.01606e-13
PFLU_3379	-5.30461	2.35464e-12
PFLU_4417	-5.69396	4.13265e-13
PFLU_2711	-5.7324	1.26719e-12
PFLU_4454	-5.72893	1.26719e-12
PFLU_5094	-5.72742	2.93427e-10
PFLU_4413	-5.66907	4.28464e-12
PFLU_2308	5.69	7.24956e-10
PFLU_0966	-5.33686	1.18921e-11
PFLU_0509	-5.56704	2.66341e-13
PFLU_1485	-5.606	3.99476e-13
PFLU_4453	-5.55027	7.15055e-13
PFLU_5039	-4.93089	1.35716e-10
PFLU_5040	-4.29225	1.14235e-08
PFLU_4445	-5.27783	8.8334e-12
PFLU_0117	-5.52773	3.75838e-12
PFLU_5095	-5.30646	4.13265e-13
PFLU_2358	-5.28236	7.5689e-11
PFLU_5037	-5.08718	2.19904e-12
PFLU_4442	-5.42057	3.24419e-13
PFLU_4721	-4.22417	3.52903e-08
PFLU_0751	-5.42741	1.69328e-13
PFLU_0398	4.60636	5.38125e-13
PFLU_4450	-5.46215	1.15856e-12
PFLU_4416	-5.21266	2.66341e-13
PFLU_4430	-5.20134	1.32414e-12
PFLU_5362	-4.8648	1.90955e-13
PFLU_4411	-5.23042	1.50892e-12
PFLU_6043	-5.27487	2.55414e-13
PFLU_3318	3.98715	4.29918e-09
PFLU_0745	-5.35165	7.8611e-14
PFLU_4276	-5.3447	1.01606e-13
PFLU_4456	-5.06988	1.73594e-12
PFLU_0752	-4.97945	7.53694e-13
PFLU_3744	-4.9584	2.15471e-11
PFLU_0744	-5.29336	4.00611e-13
PFLU_1358	-5.28393	8.37876e-06
PFLU_3745	-5.15447	1.11854e-12
PFLU_0964	-5.27701	1.05398e-12
PFLU_2297	-5.06463	6.63532e-13
PFLU_5096	-4.96151	1.29089e-13
PFLU_4410	-5.1778	1.73766e-13
PFLU_3741	-5.09046	1.33827e-10
PFLU_5499	4.67302	4.95078e-12
PFLU_1687	-4.94046	3.65021e-05
PFLU_1084	-5.22419	1.69328e-13
PFLU_2931	4.71534	2.60742e-09
PFLU_4529	4.9872	1.57684e-08
PFLU_0594	-4.91758	8.83751e-11
PFLU_1471	4.15687	1.62491e-11
PFLU_4441	-5.13488	7.15055e-13
PFLU_1043	-2.3049	0.000453213
PFLU_4401	-4.93197	1.63727e-13
PFLU_4948	-5.00946	5.38125e-13
PFLU_0874	-4.59622	7.72673e-11
PFLU_4463	1.44259	0.000279053
PFLU_4250	-4.64342	6.33581e-12
PFLU_4415	-5.03603	5.52553e-13
PFLU_0965	-5.06361	2.23243e-12
PFLU_3743	-4.86308	2.28735e-12
PFLU_0083	4.59594	7.53763e-13
PFLU_4295	4.39356	2.23243e-12
PFLU_0990	5.03036	2.54444e-08
PFLU_4408	-4.8793	5.39214e-13
PFLU_4969	-4.58203	8.39308e-13
PFLU_3746	-4.8316	4.72296e-12
PFLU_1830	3.72611	1.24766e-11
PFLU_4257	-4.71682	4.00611e-13
PFLU_3290	4.83984	5.4675e-09
PFLU_5269	4.18299	1.26719e-12
PFLU_3042	-4.92693	9.61759e-13
PFLU_1814	-4.5907	3.10002e-10
PFLU_5092	-4.92586	7.40186e-12
PFLU_4936	-4.88057	4.85235e-13
PFLU_5112	3.12882	1.51848e-06
PFLU_3279	4.80006	1.37947e-10
PFLU_1085	-4.89599	2.33071e-12
PFLU_4409	-4.86047	1.19653e-13
PFLU_0749	-4.85703	1.29089e-13
PFLU_0746	-4.85156	1.01606e-13
PFLU_3752	4.80355	1.31067e-09
PFLU_0910	-4.31645	3.01115e-11
PFLU_2918	-4.3258	1.11198e-11
PFLU_1716	3.40582	0.000916291
PFLU_0597	-4.74204	3.09899e-11
PFLU_3944	-4.25359	6.86463e-12
PFLU_0363	-4.63711	4.70034e-12
PFLU_1616	-4.17314	3.84411e-10
PFLU_4406	-4.64864	4.0596e-12
PFLU_3942	-4.12066	1.36708e-12
PFLU_3943	-4.2501	1.32451e-11
PFLU_0748	-4.67897	1.01606e-13
PFLU_4435	-4.37132	1.94522e-12
PFLU_5174	-4.0067	1.51728e-10
PFLU_0508	-4.66424	6.79796e-13
PFLU_5891	-4.65155	1.0067e-13
PFLU_0064	-4.53599	5.39214e-13
PFLU_4377	-4.63989	8.2801e-09
PFLU_4734	-4.50343	4.0596e-12
PFLU_4419	-4.44777	1.14899e-12
PFLU_3424	4.6203	4.74789e-07
PFLU_3269	4.34128	4.64977e-10
PFLU_4437	-4.49509	1.26719e-12
PFLU_4427	-4.4766	1.26719e-12
PFLU_4438	-4.59796	1.26719e-12
PFLU_0186	4.54435	5.85893e-10
PFLU_0637	-4.23171	1.29089e-13
PFLU_3444	-4.48484	7.53763e-13
PFLU_5090	-4.57399	1.25001e-10
PFLU_0747	-4.56569	1.01606e-13
PFLU_5270	3.9432	2.93837e-12
PFLU_4436	-4.54508	8.83219e-13
PFLU_3270	4.27	1.06263e-08
PFLU_2545	-4.23256	6.63532e-13
PFLU_3354	-4.33787	1.24997e-11
PFLU_3105	-4.52869	1.44759e-13
PFLU_5957	-4.51414	7.88731e-12
PFLU_0988	4.5034	5.65883e-08
PFLU_4382	3.63428	9.62992e-11
PFLU_1150	3.43979	7.5689e-11
PFLU_5093	-4.25699	7.00485e-12
PFLU_0063	-4.27467	3.24419e-13
PFLU_3516	4.47109	7.06493e-12
PFLU_3668	1.65645	0.146015
PFLU_4446	-4.38746	2.68419e-12
PFLU_4418	-4.37523	5.8182e-13
PFLU_4568	-4.38584	5.03301e-05
PFLU_4766	-3.96206	9.98525e-10
PFLU_5176	-4.41043	7.12e-09
PFLU_3289	4.31583	3.59146e-09
PFLU_4426	-4.39343	1.45298e-12
PFLU_1813	-4.31272	6.66557e-09
PFLU_0059	-4.30299	3.02715e-12
PFLU_5036	-3.42475	1.90335e-09
PFLU_4732	-4.35421	1.01606e-13
PFLU_0750	-4.21977	1.90955e-13
PFLU_6022	2.70287	0.00028107
PFLU_4609	4.33971	1.91364e-08
PFLU_4988	4.10936	6.50969e-12
PFLU_0534	4.23661	1.05398e-12
PFLU_0533	4.22971	2.33071e-12
PFLU_0061	-4.26229	1.94273e-12
PFLU_5454	4.29493	5.75273e-08
PFLU_0065	-4.10426	3.60581e-12
PFLU_3904	-4.29059	2.82315e-12
PFLU_1348	-4.27911	7.00485e-12
PFLU_0702	2.20286	4.81724e-05
PFLU_4272	4.25809	1.56295e-05
PFLU_4420	-4.02964	2.15036e-12
PFLU_0984	4.24695	5.13419e-07
PFLU_0380	-4.22661	2.96991e-10
PFLU_0703	3.25543	3.81054e-08
PFLU_2318	-3.48611	1.10234e-08
PFLU_4439	-4.2186	1.89281e-12
PFLU_3742	-4.21725	1.54886e-10
PFLU_5625	-4.15363	4.39867e-12
PFLU_3425	4.21303	8.93912e-08
PFLU_3091	2.79351	2.56403e-07
PFLU_2916	4.18211	1.8893e-10
PFLU_0698	1.50406	0.048518
PFLU_2544	-3.64996	1.5206e-09
PFLU_2319	-3.19945	6.17429e-09
PFLU_2321	-3.06033	3.24539e-09
PFLU_5322	-3.99525	3.15231e-11
PFLU_1152	4.00236	5.26479e-12
PFLU_5483	-3.60356	0.00424001
PFLU_4384	2.84805	1.08704e-09
PFLU_0066	-4.03227	1.16481e-12
PFLU_1321	-3.99259	1.81166e-11
PFLU_5556	-3.96305	6.31957e-12
PFLU_0963	-4.0799	1.47549e-11
PFLU_0645	-3.87853	2.94438e-11
PFLU_3940	-3.56767	1.6306e-11
PFLU_2039	-4.03583	1.36418e-11
PFLU_2317	-3.41179	7.44764e-10
PFLU_0817	-4.03304	1.37669e-12
PFLU_5730	-4.03179	4.72296e-12
PFLU_0362	-4.03108	5.47862e-12
PFLU_0979	4.03082	1.77199e-07
PFLU_2035	-3.62633	2.6734e-10
PFLU_5860	-3.97996	1.7863e-11
PFLU_3278	3.95378	1.63056e-09
PFLU_1132	-3.97509	1.24766e-11
PFLU_0060	-3.91953	2.35464e-12
PFLU_4440	-3.8993	1.10837e-10
PFLU_4191	-3.98805	4.0596e-12
PFLU_4277	3.63303	1.61095e-12
PFLU_5859	3.98416	3.55065e-11
PFLU_1905	3.79237	5.16901e-05
PFLU_4424	-3.97779	3.74582e-10
PFLU_2316	-3.1658	6.26638e-10
PFLU_5513	3.86199	7.13152e-12
PFLU_3766	-3.84502	1.82071e-11
PFLU_2696	-3.96302	4.79227e-12
PFLU_5225	-3.67211	1.90969e-12
PFLU_0058	-3.95493	2.57234e-12
PFLU_5582	-3.90227	1.44464e-11
PFLU_4423	-3.94476	8.83751e-11
PFLU_5761	3.94028	3.90205e-12
PFLU_5216	3.29575	1.62974e-10
PFLU_2154	3.93274	3.30365e-11
PFLU_0642	-3.52956	5.24401e-12
PFLU_3156	3.61973	9.49373e-08
PFLU_1757	-3.76379	5.52553e-13
PFLU_2919	-3.44129	1.26719e-12
PFLU_4422	-3.88388	2.19067e-11
PFLU_1131	-3.89511	1.17227e-11
PFLU_0648	-3.88503	2.35121e-12
PFLU_2003	-3.87368	4.46559e-10
PFLU_3001	1.93124	6.37077e-06
PFLU_1100	-3.79522	1.05428e-11
PFLU_3163	3.52564	1.13213e-09
PFLU_2264	-3.32161	1.51485e-10
PFLU_3941	-3.38165	3.8278e-12
PFLU_5479	2.97443	9.5056e-09
PFLU_6042	-3.84768	7.31417e-13
PFLU_0636	-3.81418	2.93993e-11
PFLU_6076	2.49761	1.1853e-06
PFLU_4554	-1.77146	0.179525
PFLU_3090	2.78749	8.71498e-07
PFLU_1906	3.52978	7.69621e-07
PFLU_4987	3.50861	8.65893e-11
PFLU_5226	-3.75461	1.05291e-11
PFLU_1363	2.44655	3.12193e-08
PFLU_1907	3.44767	8.82968e-07
PFLU_1908	3.67064	8.77994e-11
PFLU_0986	3.79847	2.46365e-06
PFLU_5487	3.79799	1.03903e-09
PFLU_0893	3.69149	6.26554e-11
PFLU_5639	1.82077	0.0140174
PFLU_2920	-3.29894	2.01384e-10
PFLU_4388	-3.12359	7.56131e-08
PFLU_2802	-3.10717	5.82131e-10
PFLU_2038	-3.77913	9.69946e-10
PFLU_0535	3.69226	2.33071e-12
PFLU_4972	-3.65837	1.05398e-12
PFLU_0085	2.99867	3.15891e-11
PFLU_5170	3.72234	1.82071e-11
PFLU_4708	3.67709	3.06684e-08
PFLU_2320	-2.66383	2.01277e-07
PFLU_2792	3.75063	3.92239e-09
PFLU_3630	-3.4518	4.04638e-12
PFLU_2586	3.74879	5.18604e-09
PFLU_2730	-2.28331	1.96553e-05
PFLU_0644	-3.71745	1.03798e-10
PFLU_1490	3.74681	4.51233e-11
PFLU_5386	2.69902	7.72673e-11
PFLU_5334	-3.66815	9.61759e-13
PFLU_1042	-1.1578	0.00571489
PFLU_0091	3.72761	1.28855e-09
PFLU_0980	3.72227	8.98959e-07
PFLU_4428	-3.72119	4.95078e-12
PFLU_0875	-2.84947	5.79343e-09
PFLU_1547	3.71188	9.88791e-12
PFLU_2558	-3.69935	6.93876e-11
PFLU_1486	-3.69848	4.84463e-09
PFLU_0755	-3.69378	1.05398e-12
PFLU_0787	-3.66052	0.00019719
PFLU_0657	3.52363	1.6462e-10
PFLU_5535	3.55591	6.29734e-13
PFLU_5536	3.53402	2.25507e-12
PFLU_1439	3.37372	1.07799e-08
PFLU_1151	-2.08378	2.05388e-07
PFLU_0973	-3.63426	1.76789e-05
PFLU_5980	3.56464	3.57758e-11
PFLU_5359	-3.5212	1.95859e-10
PFLU_0118	-3.64162	9.41108e-10
PFLU_2963	3.63786	1.06e-06
PFLU_0403	3.63491	8.1975e-11
PFLU_2729	-2.79565	1.42617e-09
PFLU_4293	-2.95885	1.21908e-09
PFLU_4378	-3.61545	1.06477e-08
PFLU_0876	-2.83736	3.87693e-08
PFLU_0639	-3.40949	3.23262e-11
PFLU_1026	-2.86622	7.89929e-06
PFLU_0646	-3.38962	7.5689e-11
PFLU_3482	-3.2568	1.92549e-11
PFLU_5729	-3.29964	8.73697e-11
PFLU_6136	3.5744	1.88761e-11
PFLU_2075	-3.58838	5.63397e-11
PFLU_4374	-3.53509	1.97352e-08
PFLU_5583	-3.56415	1.88761e-11
PFLU_2078	-3.51461	1.3549e-10
PFLU_3287	3.30837	8.42279e-09
PFLU_5512	3.46339	2.5757e-11
PFLU_4429	-3.55207	9.57709e-13
PFLU_4243	-3.31486	1.32171e-07
PFLU_2153	2.47858	3.54273e-07
PFLU_3989	-3.45416	3.65221e-11
PFLU_1205	-3.52718	6.33581e-12
PFLU_3902	-3.52533	2.72167e-11
PFLU_3736	3.44595	6.28147e-09
PFLU_0982	3.5211	3.75671e-06
PFLU_3410	-3.3558	3.63076e-11
PFLU_0297	3.16491	0.000590588
PFLU_2080	-3.40406	7.78784e-12
PFLU_3903	-3.49773	5.5581e-09
PFLU_2694	-3.0777	1.1126e-08
PFLU_1396	-3.25561	1.12044e-11
PFLU_2803	-2.70011	9.36434e-10
PFLU_3734	-3.39976	1.95614e-12
PFLU_5169	3.20964	3.97825e-11
PFLU_3570	2.86798	2.37762e-05
PFLU_0141	-3.47383	1.24997e-11
PFLU_3562	3.2652	6.54842e-10
PFLU_2921	-2.39721	1.02615e-08
PFLU_5509	3.46071	6.49013e-10
PFLU_2394	-3.04786	6.6663e-09
PFLU_3288	3.3354	3.16858e-08
PFLU_4334	3.45096	1.65563e-06
PFLU_0369	-3.44973	1.05398e-12
PFLU_0651	-3.44726	2.27297e-11
PFLU_0839	3.3855	2.16393e-11
PFLU_2471	-3.18824	1.46052e-09
PFLU_0458	-3.30873	9.53897e-13
PFLU_1025	-2.587	4.26343e-05
PFLU_4736	-3.36937	2.16972e-11
PFLU_1136	-3.42294	4.19347e-12
PFLU_2077	-2.86064	2.14248e-10
PFLU_4883	-3.31854	1.66515e-12
PFLU_0370	-3.20283	5.52553e-13
PFLU_2470	-3.14355	4.8101e-09
PFLU_4425	-3.3731	2.86882e-11
PFLU_5511	3.33242	2.83104e-10
PFLU_0575	2.49358	3.35429e-10
PFLU_1604	-3.36457	6.70613e-09
PFLU_0361	-3.36292	2.94469e-10
PFLU_0062	-3.26439	3.7801e-11
PFLU_1649	3.31687	1.57315e-11
PFLU_0765	3.35834	2.51659e-10
PFLU_5858	3.3324	1.28531e-08
PFLU_2081	-3.35427	9.04222e-11
PFLU_0641	-3.3464	1.16484e-08
PFLU_2058	-2.54591	1.43731e-06
PFLU_5115	2.74266	2.90495e-06
PFLU_3280	3.21191	7.96286e-09
PFLU_5567	-3.1283	1.7863e-11
PFLU_1364	2.06647	1.41999e-06
PFLU_2616	-3.19742	5.39214e-13
PFLU_5584	-3.28856	1.3414e-11
PFLU_3089	2.41049	2.49088e-08
PFLU_0367	-3.15844	5.57972e-12
PFLU_5324	-3.29104	1.63562e-12
PFLU_3220	-2.84717	3.75151e-09
PFLU_1250	-3.28966	1.00754e-11
PFLU_5979	3.27617	1.17503e-09
PFLU_1756	-3.00242	1.14439e-09
PFLU_5532	3.24803	7.82165e-12
PFLU_2040	-3.01364	1.58289e-09
PFLU_5215	2.7107	1.86117e-08
PFLU_2074	-3.22067	5.85444e-11
PFLU_3219	-3.02876	8.93115e-10
PFLU_2036	-3.23791	1.51323e-10
PFLU_2979	3.26115	5.80786e-09
PFLU_3092	2.00927	1.57462e-07
PFLU_0089	3.2705	1.65683e-06
PFLU_5141	2.77154	3.75586e-10
PFLU_2658	-3.21509	2.16972e-11
PFLU_5171	3.17501	7.38353e-12
PFLU_0351	2.88664	4.49933e-06
PFLU_3130	-3.24671	6.99279e-07
PFLU_0987	3.24439	7.91321e-07
PFLU_4305	1.63664	0.0100351
PFLU_4810	-3.011	5.17147e-11
PFLU_3362	3.00066	1.8164e-12
PFLU_5644	2.39752	3.17148e-08
PFLU_2757	3.22316	1.01995e-08
PFLU_2951	3.22181	8.1756e-10
PFLU_4615	-2.63275	6.40687e-08
PFLU_4958	2.87256	4.13143e-08
PFLU_4991	3.20003	1.55389e-08
PFLU_2535	3.19558	0.000873574
PFLU_2224	-2.81991	1.19833e-08
PFLU_0067	-3.19377	3.21304e-12
PFLU_2326	-2.07524	2.78547e-05
PFLU_0676	-2.80751	7.28518e-09
PFLU_5255	3.18208	5.0736e-10
PFLU_5525	3.15169	1.12174e-10
PFLU_5510	3.06309	4.38766e-11
PFLU_5538	3.00111	1.05398e-12
PFLU_2726	-3.16861	3.10816e-11
PFLU_5526	3.0783	2.34729e-10
PFLU_0818	-3.06852	3.16236e-11
PFLU_0915	-2.99908	1.26719e-12
PFLU_2323	-2.00338	1.65798e-06
PFLU_3906	-3.15296	1.68736e-11
PFLU_4400	-3.14872	7.12894e-13
PFLU_4989	2.75563	1.08298e-10
PFLU_4644	-3.01236	2.16972e-11
PFLU_0994	-3.05882	4.5955e-10
PFLU_4555	-0.726498	0.663807
PFLU_1578	2.8195	7.06493e-12
PFLU_0952	-3.12111	8.57555e-11
PFLU_2302	-2.93573	1.56995e-12
PFLU_0542	-3.07876	1.26719e-12
PFLU_0649	-3.11401	1.12529e-07
PFLU_5565	-2.97791	1.81166e-11
PFLU_1270	3.01239	4.51233e-11
PFLU_1101	-2.95644	3.04438e-09
PFLU_4387	-2.89139	1.65677e-09
PFLU_1575	2.94654	3.65221e-11
PFLU_2543	-2.44651	2.38748e-08
PFLU_3905	-3.09758	7.46631e-12
PFLU_0294	-2.71111	1.83637e-08
PFLU_4610	3.09352	2.158e-06
PFLU_5488	3.09098	7.32364e-09
PFLU_5528	3.08785	2.71598e-09
PFLU_3359	-3.08296	3.942e-11
PFLU_2288	2.11309	8.04081e-07
PFLU_1138	-3.07501	4.19347e-12
PFLU_5480	2.27296	1.91886e-07
PFLU_5481	2.23432	8.81278e-08
PFLU_5089	-3.06687	5.16252e-08
PFLU_2561	-0.61141	0.604104
PFLU_3107	2.94293	2.53319e-06
PFLU_0924	-2.93684	2.72535e-08
PFLU_1423	3.05313	2.3144e-09
PFLU_5431	-3.05291	2.09669e-11
PFLU_0675	-2.62725	4.8101e-09
PFLU_4714	2.90702	3.92704e-10
PFLU_5527	3.00014	8.6561e-10
PFLU_0909	-2.37703	6.59419e-07
PFLU_1914	-3.04799	1.36891e-12
PFLU_0365	-3.04465	4.28594e-12
PFLU_2531	3.04066	3.67665e-08
PFLU_6135	3.02225	5.94555e-11
PFLU_5802	3.03642	2.77336e-09
PFLU_3487	-3.02049	3.95075e-11
PFLU_2647	-2.9952	1.84734e-11
PFLU_2529	3.03048	5.45822e-08
PFLU_2066	-3.01566	1.00754e-11
PFLU_3435	2.49704	4.55836e-08
PFLU_2076	-3.02601	4.55307e-10
PFLU_4292	-2.42554	1.13727e-08
PFLU_4151	3.00096	7.07886e-10
PFLU_0638	-2.89565	5.09115e-10
PFLU_4614	-3.02015	1.7729e-11
PFLU_1090	3.00939	9.41108e-10
PFLU_5247	-3.01786	3.90205e-12
PFLU_4443	-3.01503	1.32414e-12
PFLU_0327	3.00381	8.65893e-11
PFLU_1137	-3.01046	9.655e-11
PFLU_2055	1.12704	0.0007251
PFLU_5731	-2.90705	5.70232e-08
PFLU_4819	-2.86681	6.87092e-11
PFLU_5010	2.90338	2.69626e-11
PFLU_5033	2.87782	1.41256e-09
PFLU_1351	-2.90057	2.12206e-06
PFLU_4053	1.62972	0.000877799
PFLU_5566	-2.99349	1.75847e-11
PFLU_0760	2.87606	1.32606e-09
PFLU_1919	2.98364	4.25042e-10
PFLU_5774	2.80687	3.19354e-07
PFLU_2888A	-2.97829	1.11184e-07
PFLU_1566	2.83219	1.62491e-11
PFLU_0754	-2.68873	4.55307e-10
PFLU_1213	-2.93532	2.39052e-10
PFLU_4737	-2.95373	9.49259e-12
PFLU_4383	2.08568	2.01745e-08
PFLU_3336	-2.90669	7.12561e-10
PFLU_4918	2.95544	9.17674e-10
PFLU_0569	-2.95294	3.942e-11
PFLU_0923	-2.62841	1.28357e-08
PFLU_5789	-2.23224	5.84603e-09
PFLU_0981	2.94367	9.27715e-06
PFLU_5156	-2.43455	1.47172e-08
PFLU_0650	-2.94055	7.89748e-09
PFLU_1648	2.82159	3.57758e-11
PFLU_1502	-2.42983	1.06502e-10
PFLU_4707	2.63973	3.31602e-06
PFLU_3619	-1.48577	0.00670785
PFLU_4081	2.90164	7.96408e-08
PFLU_2079	-2.92205	9.80968e-12
PFLU_2324	-1.70201	4.90179e-05
PFLU_2573	2.91061	2.7143e-08
PFLU_5728	-2.90923	8.45664e-10
PFLU_1249	-2.87118	1.85862e-10
PFLU_5268	2.72058	7.69175e-10
PFLU_3816	-2.69886	4.28464e-12
PFLU_3881	-2.62103	1.06892e-09
PFLU_2605	2.89762	2.91678e-07
PFLU_0840	2.87286	2.53204e-10
PFLU_3733	-2.66026	3.86677e-10
PFLU_5140	2.49777	5.59876e-05
PFLU_2222	-2.217	3.7265e-06
PFLU_0176	2.70312	0.000108183
PFLU_0598	-2.88192	2.96781e-09
PFLU_5013	2.83745	6.61918e-11
PFLU_2037	-2.2848	6.43755e-08
PFLU_5564	-2.87767	3.85956e-12
PFLU_0697	0.841339	0.0350748
PFLU_2930	2.65503	7.98158e-07
PFLU_0352	-2.51187	7.69175e-10
PFLU_5075	2.21879	1.21226e-08
PFLU_3677	2.19473	8.87459e-07
PFLU_2127	2.4928	4.54278e-07
PFLU_3854	-2.76994	2.57245e-08
PFLU_4212	2.85634	0.00019719
PFLU_0621	-2.84911	7.19016e-10
PFLU_5522	2.84531	1.34129e-10
PFLU_0366	-2.72516	2.0175e-11
PFLU_3787	-2.71545	1.99177e-09
PFLU_0167	-2.84033	1.57464e-09
PFLU_0135	-2.83952	1.08704e-09
PFLU_6041	2.2815	2.45197e-07
PFLU_2072	-2.57693	1.33891e-08
PFLU_0681	2.83276	9.19094e-07
PFLU_4709	2.79013	1.64347e-09
PFLU_5519	2.7062	1.70679e-10
PFLU_1251	-2.82247	1.6462e-10
PFLU_5626	-2.65884	1.57315e-11
PFLU_5427	2.75948	4.68388e-11
PFLU_0451	-2.81002	8.66646e-08
PFLU_0565	2.77769	1.11861e-06
PFLU_0699	1.01964	0.0315089
PFLU_1202	-2.8047	5.04058e-11
PFLU_5047	-2.80174	8.8725e-12
PFLU_1365	1.77948	3.8987e-06
PFLU_0315	-1.44285	1.26478e-05
PFLU_6109	-2.79874	3.46972e-10
PFLU_6023	0.945139	0.0549554
PFLU_0948	-2.79257	1.42033e-10
PFLU_0985	2.79245	3.2578e-06
PFLU_6006	0.736655	0.0004718
PFLU_6025	0.764359	0.0043646
PFLU_0541	-2.41594	7.43721e-09
PFLU_2106	-2.78548	1.39197e-05
PFLU_5220	2.70085	2.18325e-10
PFLU_2053	2.77948	4.21178e-09
PFLU_3184	2.42176	2.24229e-07
PFLU_0551	-2.62853	1.32119e-09
PFLU_0643	-2.15487	3.80002e-08
PFLU_0441	1.77395	3.8719e-07
PFLU_1252	-2.72741	2.38748e-08
PFLU_5967	-2.60235	9.46321e-10
PFLU_5138	2.14549	6.44745e-06
PFLU_5829	2.65551	2.31916e-10
PFLU_4397	-2.66724	2.35375e-09
PFLU_2367	2.40511	3.31349e-07
PFLU_5508	2.72457	3.54979e-10
PFLU_3674	1.52581	0.0166014
PFLU_0983	2.75557	1.22011e-05
PFLU_0662	2.73544	2.42203e-10
PFLU_5503	2.64246	2.04838e-10
PFLU_4925	-2.61311	1.38144e-08
PFLU_5524	2.74553	1.90219e-09
PFLU_0543	-2.70601	9.51564e-11
PFLU_4811	-2.53484	9.59632e-10
PFLU_2547	-2.27624	4.08619e-06
PFLU_4117	-2.32098	1.31312e-08
PFLU_1877	2.61915	2.49096e-07
PFLU_5044	2.61604	1.79688e-10
PFLU_2327	-1.81866	1.91285e-05
PFLU_1522	2.72483	6.54227e-09
PFLU_4366	-2.31401	5.19747e-06
PFLU_0690	-2.37052	4.6789e-06
PFLU_1576	2.46385	2.95647e-10
PFLU_0756	-2.71652	2.64427e-12
PFLU_5489	2.71516	1.12965e-08
PFLU_5518	2.5844	1.17503e-09
PFLU_1349	-2.7135	1.67447e-09
PFLU_0554	-2.62867	7.70162e-10
PFLU_0171	-2.70755	1.69075e-10
PFLU_6053	-2.48402	5.87317e-09
PFLU_5529	2.66857	6.66493e-11
PFLU_0572	-2.70188	9.69946e-10
PFLU_5523	2.69825	1.62888e-08
PFLU_5773	2.44751	1.56589e-08
PFLU_5076	2.34706	3.43234e-09
PFLU_2710	-2.32759	2.47869e-08
PFLU_3764	-2.57587	1.90248e-10
PFLU_1710	-2.69418	2.35464e-12
PFLU_2030	-2.49911	1.41191e-09
PFLU_4623	2.12384	3.30084e-06
PFLU_5249	2.27017	5.97984e-10
PFLU_1224	-2.68781	1.90248e-10
PFLU_5537	2.47627	3.54939e-11
PFLU_3388	-2.68511	1.43061e-09
PFLU_1027	-2.11828	1.3305e-07
PFLU_0516	-2.64572	4.75427e-11
PFLU_6021	0.628482	0.0148004
PFLU_5531	2.62657	1.24997e-11
PFLU_2163	-2.67653	3.87693e-08
PFLU_3048	-2.17769	3.96233e-05
PFLU_3271	2.51508	2.83465e-08
PFLU_5530	2.56751	6.26554e-11
PFLU_1010	-2.24787	1.79997e-09
PFLU_2309	2.67333	2.22431e-06
PFLU_5790	-2.17885	2.66021e-10
PFLU_0555	-2.65318	6.89811e-10
PFLU_5012	2.55543	1.3216e-10
PFLU_4741	2.67085	1.19292e-06
PFLU_4459	-2.35703	1.74798e-07
PFLU_6108	-2.57802	1.46791e-10
PFLU_3662	1.75823	1.75039e-05
PFLU_4643	-2.43398	3.37864e-09
PFLU_5539	2.50208	8.73697e-11
PFLU_4035	-2.32069	8.8777e-11
PFLU_6014	1.33601	0.00125984
PFLU_3583	-1.5383	5.80818e-06
PFLU_2601	1.78778	0.0166352
PFLU_6097	-2.48485	1.70434e-09
PFLU_0328	2.58402	8.11117e-09
PFLU_0688	-2.48213	2.24718e-11
PFLU_5972	2.65289	4.15019e-05
PFLU_1041	-2.11483	9.22876e-07
PFLU_0753	-2.48464	1.301e-09
PFLU_3498	0.00450668	0.996807
PFLU_3584	-1.50722	2.34031e-05
PFLU_3426	2.6458	8.90924e-07
PFLU_2128	2.32997	2.615e-09
PFLU_0826	-2.57504	2.62211e-09
PFLU_0090	2.64356	5.13419e-07
PFLU_0187	2.42896	2.96751e-09
PFLU_1353	-2.53681	4.26146e-10
PFLU_0764	2.56813	6.27292e-11
PFLU_2126	-2.40196	0.000398063
PFLU_0520	-2.6312	4.85002e-11
PFLU_0308	-2.62838	4.99308e-10
PFLU_2218	-2.28157	2.26468e-09
PFLU_4396	-2.53358	6.3704e-11
PFLU_2591	2.51321	1.9661e-07
PFLU_5788	-1.90566	6.8494e-08
PFLU_5034	2.35813	4.80791e-10
PFLU_3635	2.46157	5.18604e-09
PFLU_4240	-2.49738	1.82458e-08
PFLU_2971	-2.4097	2.66852e-09
PFLU_4780	2.61346	4.84932e-08
PFLU_5361	-2.17849	1.51345e-09
PFLU_5521	2.60859	8.94995e-11
PFLU_1709	-2.13443	2.42861e-09
PFLU_3040	-2.54322	1.14439e-09
PFLU_3108	2.48249	2.84432e-07
PFLU_3014	-2.60092	4.36616e-10
PFLU_1995	2.60071	2.04532e-09
PFLU_0684	2.48697	4.08693e-08
PFLU_1000	-2.50729	9.32457e-09
PFLU_3631	-2.08272	1.65372e-05
PFLU_5078	2.41743	1.91578e-07
PFLU_5014	2.59021	2.3933e-10
PFLU_5593	-2.59111	4.4828e-11
PFLU_3221	-2.58809	1.06405e-06
PFLU_4190	-2.58938	8.8725e-12
PFLU_5504	2.49517	3.10474e-11
PFLU_4717	-2.58547	3.14523e-08
PFLU_3711	2.46607	3.1299e-05
PFLU_1255	-2.28296	1.06083e-08
PFLU_4267	2.58216	1.0818e-05
PFLU_1070	1.77454	1.51366e-07
PFLU_4433	-2.54338	3.10066e-10
PFLU_0940	-2.57946	1.41902e-06
PFLU_5604	1.29744	0.0250115
PFLU_3982	-2.12983	2.05853e-06
PFLU_0647	-2.4299	3.10786e-10
PFLU_3582	-1.2345	6.8493e-05
PFLU_3188	2.20415	2.62706e-06
PFLU_5118	2.57058	6.50712e-10
PFLU_0170	-2.47313	3.45718e-10
PFLU_2151	-2.33721	1.40102e-08
PFLU_2325	-1.5703	0.000206655
PFLU_1432	-2.20974	8.50473e-10
PFLU_3599	2.56163	1.47292e-08
PFLU_3356	-2.50457	1.90219e-09
PFLU_5333	-2.49558	5.85444e-11
PFLU_6134	2.3579	7.44764e-10
PFLU_2368	2.50816	1.37437e-07
PFLU_5173	2.27216	1.99434e-09
PFLU_4458	-1.80748	2.33692e-06
PFLU_5502	2.46336	4.68388e-11
PFLU_5346	-2.55354	8.2824e-11
PFLU_5383	-2.10908	9.11127e-06
PFLU_3808	-2.5465	6.91833e-10
PFLU_4198	-2.54723	1.51728e-10
PFLU_5568	-2.3609	1.36231e-10
PFLU_1685	-1.75971	1.86051e-05
PFLU_0146	-2.53983	3.29223e-08
PFLU_0951	-2.53561	7.62726e-11
PFLU_1512	-2.53122	3.98474e-09
PFLU_0084	1.94778	6.33729e-10
PFLU_6020	0.722751	0.0194244
PFLU_5252	2.10213	2.79003e-08
PFLU_2900	2.28889	3.13838e-06
PFLU_3833	2.5274	7.54934e-07
PFLU_3275	2.28242	4.95084e-06
PFLU_3650	-2.30993	1.13276e-08
PFLU_1702	-2.18959	7.62868e-07
PFLU_5507	2.517	4.39164e-10
PFLU_5486	2.51593	4.99131e-09
PFLU_5505	2.47878	2.94438e-11
PFLU_5432	-2.51368	2.95647e-10
PFLU_2648	-2.50965	1.534e-09
PFLU_4319	-2.18771	4.65951e-11
PFLU_1717	-2.45958	2.29942e-10
PFLU_3136	-2.34984	2.30046e-09
PFLU_2987	2.43282	3.16328e-07
PFLU_2452	0.698928	0.114006
PFLU_1225	-2.50205	1.01424e-10
PFLU_5254	2.31291	1.1734e-09
PFLU_4901	2.34999	1.85989e-09
PFLU_4116	-2.16441	1.80507e-09
PFLU_1368	-2.30973	2.53879e-11
PFLU_5335	-2.4942	5.63775e-11
PFLU_4205	2.48729	6.54792e-10
PFLU_5548	2.33176	9.63299e-10
PFLU_0949	-2.4833	3.35878e-09
PFLU_0255	2.17209	3.34647e-06
PFLU_5795	2.3388	1.42085e-08
PFLU_0943	-2.48003	2.29942e-10
PFLU_5520	2.46605	4.01535e-11
PFLU_0405	2.37369	4.34087e-10
PFLU_3192	-2.27646	6.03263e-08
PFLU_5256	2.06785	1.56589e-08
PFLU_1789	-2.30065	4.90037e-11
PFLU_4933	2.28063	6.15586e-11
PFLU_2791	-0.994314	0.0203201
PFLU_4460	-2.47018	6.94624e-08
PFLU_0392	-2.27618	1.40868e-09
PFLU_0945	-2.46163	3.45718e-10
PFLU_3515	-2.45977	1.73083e-07
PFLU_3291	2.42399	2.87176e-07
PFLU_3682	2.4552	5.84411e-07
PFLU_5501	2.33192	5.04058e-11
PFLU_0728	2.45166	1.72033e-07
PFLU_5724	2.45127	1.05428e-11
PFLU_4746	-2.18782	6.08168e-08
PFLU_0683	2.34941	7.87631e-11
PFLU_4325	-2.23131	1.20324e-05
PFLU_4499	2.33794	2.66623e-09
PFLU_4076	2.44799	0.00149162
PFLU_2706	-2.44704	9.04459e-10
PFLU_5516	2.4032	1.40568e-10
PFLU_3272	2.23281	1.99934e-06
PFLU_1643	2.27763	3.98021e-10
PFLU_4320	2.44354	9.13831e-09
PFLU_5540	2.30844	1.35716e-10
PFLU_3678	1.83644	8.01951e-05
PFLU_2045	-2.44146	2.46365e-06
PFLU_5772	2.25346	3.1239e-07
PFLU_3306	-1.46904	1.4985e-05
PFLU_1140	-2.36808	2.77336e-09
PFLU_2915	2.43899	7.5689e-11
PFLU_0691	-2.39537	3.32569e-11
PFLU_1302A	2.25139	2.6322e-09
PFLU_5139	1.69958	0.000174788
PFLU_2617	-2.00995	1.31868e-08
PFLU_1524	-2.33426	1.39906e-11
PFLU_1133	-2.28777	2.01212e-06
PFLU_0368	-2.28069	5.83507e-10
PFLU_4622	2.32892	8.73122e-07
PFLU_4249	-2.32613	1.91995e-09
PFLU_5968	-2.28209	5.4675e-09
PFLU_4207	2.42688	2.82373e-11
PFLU_5430	-2.42014	1.14845e-07
PFLU_3568	-2.17614	6.19202e-10
PFLU_2970	-1.83296	1.49606e-05
PFLU_4579	-2.41656	1.96665e-09
PFLU_5590	2.3777	1.2605e-08
PFLU_1163	2.25009	2.05315e-07
PFLU_2307	2.42166	4.1534e-07
PFLU_0519	-2.41933	9.76036e-10
PFLU_5544	-2.16684	8.20201e-09
PFLU_3970	2.41365	8.3948e-07
PFLU_3901	-2.40184	8.6462e-11
PFLU_4517	2.41183	1.27955e-06
PFLU_3049	-2.00117	2.08575e-08
PFLU_4461	1.21424	4.45461e-05
PFLU_0039	-2.39906	5.4036e-09
PFLU_0011	2.35882	1.84727e-09
PFLU_0553	-2.22731	3.09276e-09
PFLU_1139	-2.39997	6.72866e-11
PFLU_2530	2.39846	5.58309e-08
PFLU_1594	-2.29021	3.0795e-07
PFLU_3389	-2.32276	7.12497e-09
PFLU_5726	1.80391	8.93115e-10
PFLU_1319	-2.39322	2.89118e-09
PFLU_4701	2.35646	4.21127e-10
PFLU_2071	-2.15478	1.7931e-09
PFLU_4995	1.91968	7.28267e-07
PFLU_1903A	2.39203	6.54041e-06
PFLU_2382	2.20287	7.79948e-10
PFLU_1825	2.02987	6.47626e-07
PFLU_3390	-2.22879	3.76408e-08
PFLU_0903	2.29433	2.38202e-09
PFLU_4432	-2.3449	2.21862e-10
PFLU_3675	1.32523	0.00963343
PFLU_3874	2.37968	3.39896e-06
PFLU_2454	0.446315	0.291319
PFLU_2953	-2.37897	6.1209e-08
PFLU_3443	-2.25438	4.67481e-07
PFLU_3204	-2.19308	6.81126e-08
PFLU_4321	2.37101	3.33371e-08
PFLU_3380	-2.07443	7.92364e-09
PFLU_5344	-2.36895	6.57436e-10
PFLU_3405	2.36684	4.00071e-10
PFLU_0731	2.2603	1.51148e-09
PFLU_1787	-2.21039	2.02345e-08
PFLU_1433	-1.88617	1.57857e-08
PFLU_6085	1.58056	1.6941e-05
PFLU_0704	-2.35904	5.68167e-08
PFLU_0614	2.26484	4.46559e-10
PFLU_2152	-2.19188	8.60962e-08
PFLU_0926	-2.25706	5.92062e-09
PFLU_0603	2.35252	1.54044e-08
PFLU_5506	2.35082	1.51728e-10
PFLU_1816	2.1485	4.79651e-10
PFLU_1050	2.32371	3.89537e-08
PFLU_0475	2.2397	2.08764e-10
PFLU_0017	2.22788	3.66366e-08
PFLU_5330	2.25305	6.2808e-09
PFLU_0956	-2.29924	4.96595e-10
PFLU_2246	2.34025	1.7247e-05
PFLU_1271	2.16757	3.19495e-10
PFLU_0319	-1.88539	3.52133e-08
PFLU_5345	-2.33841	7.69175e-10
PFLU_5725	1.49348	6.63156e-08
PFLU_2813	2.1005	1.60955e-06
PFLU_1086	-2.12102	1.31676e-09
PFLU_3529	1.73573	3.19594e-05
PFLU_2587	-2.20287	3.74679e-08
PFLU_5253	2.17526	3.76085e-11
PFLU_0040	-2.27934	2.53893e-10
PFLU_2159	-1.87902	9.08157e-09
PFLU_5935	-2.27376	3.34115e-09
PFLU_4097	-1.75446	2.57794e-06
PFLU_0659	-2.25214	1.92353e-11
PFLU_5009	2.15754	3.45334e-09
PFLU_0942	-2.32077	5.81593e-09
PFLU_2220	-1.60956	6.647e-08
PFLU_0709	-2.31872	3.01681e-09
PFLU_5886	2.31803	1.6721e-07
PFLU_5613	-2.3173	3.55549e-09
PFLU_2133	2.20103	3.10793e-06
PFLU_5823	2.17235	2.54822e-07
PFLU_4054	0.993994	0.0293201
PFLU_4664	-2.1047	1.80507e-09
PFLU_4010	-2.31183	2.29942e-10
PFLU_3334	2.31066	6.62223e-09
PFLU_3276	2.05311	9.21387e-07
PFLU_2271	-2.23713	2.82373e-11
PFLU_3616	2.30712	1.19684e-08
PFLU_0147	2.30521	3.16257e-07
PFLU_1788	-2.3037	6.30014e-09
PFLU_4742	2.30349	2.17807e-06
PFLU_3795	2.00107	2.32031e-06
PFLU_5514	2.30163	3.67102e-08
PFLU_0076	2.04037	1.11586e-07
PFLU_0447	-2.29779	1.92538e-07
PFLU_0364	-2.03427	6.45024e-09
PFLU_0342	2.29609	1.41847e-08
PFLU_5500	-2.03416	8.47565e-09
PFLU_0201	2.2924	0.000899735
PFLU_4833	2.29121	7.65824e-07
PFLU_3413	-2.29087	0.00191796
PFLU_3719	2.12035	0.000348785
PFLU_1920	2.28956	5.49834e-09
PFLU_5866	2.28659	2.70415e-06
PFLU_2073	-1.88327	4.137e-08
PFLU_5517	2.25787	4.73414e-10
PFLU_5251	2.2336	1.45769e-10
PFLU_4862	-2.2781	5.84657e-10
PFLU_4668	1.99699	2.16577e-06
PFLU_1831	1.98562	2.6048e-09
PFLU_5571	-2.27589	3.35309e-10
PFLU_1570	-2.27475	7.10615e-10
PFLU_0737	2.18796	1.54411e-09
PFLU_1886	-2.1931	9.5056e-09
PFLU_0612	1.9917	2.10973e-07
PFLU_0556	-1.81772	6.98715e-09
PFLU_5596	-2.26551	4.92806e-09
PFLU_4738	-2.2639	5.72384e-10
PFLU_4694	-2.20321	8.10785e-10
PFLU_1040	-1.90945	1.3698e-10
PFLU_4099	-1.92624	9.42018e-07
PFLU_0611	1.84658	5.16303e-08
PFLU_5764	1.55679	6.77494e-06
PFLU_1682	2.25714	4.97115e-06
PFLU_1307	-2.25665	6.05425e-09
PFLU_1492	2.15896	5.20817e-09
PFLU_3079	-1.89487	1.47916e-07
PFLU_6067	-2.25314	8.53384e-08
PFLU_5673	0.867293	0.000414035
PFLU_4026	-1.51588	1.41923e-05
PFLU_6057	1.72879	0.000171571
PFLU_1853	-2.25046	1.74363e-07
PFLU_6027	0.765978	0.17333
PFLU_0946	-2.24795	5.43333e-09
PFLU_5218	1.85006	1.12824e-09
PFLU_5410	2.05561	4.60857e-09
PFLU_0788	-1.88833	0.00134841
PFLU_2474	1.26857	0.00271665
PFLU_5900	2.15544	1.10234e-08
PFLU_1067	2.03185	2.44706e-06
PFLU_1491	2.14579	8.30259e-09
PFLU_0950	-2.23559	7.74725e-10
PFLU_3165	1.77075	3.01878e-08
PFLU_4559	-2.2326	1.17866e-10
PFLU_2788	-1.02525	0.00054631
PFLU_2466	2.22938	1.0405e-08
PFLU_4004	-1.66478	3.40565e-05
PFLU_4905	2.22536	1.29067e-09
PFLU_5134	1.7483	7.5046e-05
PFLU_5557	-2.09449	1.24895e-10
PFLU_6110	-1.95187	2.65265e-09
PFLU_3177	2.21888	8.106e-10
PFLU_0863	1.91278	7.97172e-09
PFLU_5248	2.20951	2.12785e-07
PFLU_0877	-2.20878	7.34717e-09
PFLU_5017	2.13635	3.98021e-10
PFLU_5801	2.04833	8.17265e-08
PFLU_5144	1.37928	0.0030217
PFLU_0340	1.60121	8.19377e-06
PFLU_1278	1.66479	1.02005e-08
PFLU_0625	2.09645	1.36938e-06
PFLU_1046	-1.54239	0.00141373
PFLU_1866	2.19898	1.42618e-08
PFLU_1817	2.03116	3.83582e-08
PFLU_2028	2.11904	3.49174e-07
PFLU_2180	-2.12075	1.31935e-08
PFLU_4626	1.03766	0.00677931
PFLU_0895	1.93363	6.54792e-10
PFLU_5896	-1.4083	2.23966e-05
PFLU_2776	-1.76315	0.00748105
PFLU_3199	-2.19062	2.34696e-05
PFLU_4098	-1.59991	1.60171e-06
PFLU_2571	-1.79753	2.75328e-07
PFLU_3446	0.109452	0.897989
PFLU_0482	2.14753	7.69175e-10
PFLU_2272	-2.16541	1.51728e-10
PFLU_3462	-2.17865	6.54227e-09
PFLU_3286	1.88239	1.17315e-06
PFLU_3786	2.16336	5.35146e-10
PFLU_5961	2.02831	1.32064e-06
PFLU_2922	-2.18348	1.54411e-09
PFLU_5200	2.1819	0.000169443
PFLU_3123	1.49981	0.000144631
PFLU_0592	-2.16895	8.87004e-06
PFLU_4104	-2.17059	2.85623e-09
PFLU_0682	1.96502	1.31923e-07
PFLU_4560	-2.1791	2.18404e-08
PFLU_5765	1.46328	1.03153e-05
PFLU_5395	2.0198	2.43698e-05
PFLU_5628	-1.2069	2.40451e-05
PFLU_5470	2.13898	5.28437e-11
PFLU_6024	0.344323	0.361729
PFLU_1134	-2.17391	2.21525e-08
PFLU_1003	-1.94582	7.68922e-09
PFLU_3813	2.1492	5.72991e-09
PFLU_2651	1.79955	1.70309e-05
PFLU_3041	-2.17226	1.79688e-10
PFLU_5241	2.1303	8.46254e-08
PFLU_2724	-2.16836	1.02483e-07
PFLU_4103	-2.16626	1.25001e-10
PFLU_1436	-2.09898	3.67959e-09
PFLU_1299	2.00745	3.82768e-07
PFLU_0267	2.08678	5.7483e-09
PFLU_4395	-2.02636	2.87293e-10
PFLU_3129	-2.16031	2.3859e-07
PFLU_4170	1.49416	0.00141802
PFLU_0528	-1.6144	1.50289e-06
PFLU_0742	2.15861	1.7431e-06
PFLU_0010	1.95359	4.09159e-09
PFLU_5965	-2.10154	7.9168e-11
PFLU_6018	1.71031	2.47047e-06
PFLU_4326	2.15667	1.91853e-06
PFLU_3981	-1.47117	6.06125e-05
PFLU_5845	-1.98494	1.28628e-09
PFLU_5292	1.99413	1.28929e-06
PFLU_2642	2.09616	1.78742e-07
PFLU_5843	-2.04667	3.92704e-10
PFLU_3805	-2.04322	7.26451e-08
PFLU_0680	2.02386	3.82498e-09
PFLU_4399	2.14987	8.77406e-09
PFLU_5966	-2.14742	1.15469e-09
PFLU_2057	-1.84573	2.56637e-06
PFLU_2427	1.85147	7.90094e-06
PFLU_3747	-2.13883	9.72471e-10
PFLU_5841	-1.98003	1.89793e-08
PFLU_0028	-2.14201	5.15765e-10
PFLU_4625	1.20697	0.0016627
PFLU_4306	-2.13916	2.82883e-07
PFLU_0283	2.07553	1.10234e-08
PFLU_6086	1.97408	0.0012071
PFLU_0142	-2.12825	1.00166e-10
PFLU_1867	2.02319	6.31534e-10
PFLU_3567	-2.05171	1.97483e-09
PFLU_5822	-1.9282	4.10059e-08
PFLU_1002	-1.93578	2.37304e-08
PFLU_0563	1.50339	0.000357641
PFLU_0894	2.04199	1.29462e-09
PFLU_1305	1.76135	0.000206655
PFLU_4556	-0.944534	0.180077
PFLU_0914	-2.04171	5.0577e-10
PFLU_1052	1.9512	1.03472e-09
PFLU_5595	-2.12354	1.65677e-09
PFLU_6121	1.21346	2.61066e-07
PFLU_5545	-1.5859	2.1117e-08
PFLU_5137	1.32795	0.00162664
PFLU_3073	-1.86638	6.38405e-07
PFLU_5713	1.97378	2.5795e-08
PFLU_3533	0.897633	0.0186888
PFLU_5534	1.9598	2.92666e-10
PFLU_6079	-2.04769	3.58841e-10
PFLU_2674	1.99063	1.67005e-09
PFLU_1107	1.99449	2.98241e-09
PFLU_0338	2.07296	7.90508e-08
PFLU_3195	-0.396628	0.319252
PFLU_0181	-2.10624	6.60747e-09
PFLU_2725	-2.08504	2.83151e-06
PFLU_4786	-2.10544	1.10052e-08
PFLU_6015	0.469691	0.154894
PFLU_4294	-1.36686	5.72061e-08
PFLU_2160	-1.6963	1.01704e-07
PFLU_0939	-2.10203	2.11298e-07
PFLU_0465	1.44147	0.000112901
PFLU_0029	-2.09935	1.81396e-08
PFLU_4595	-1.97141	3.10002e-10
PFLU_0905	1.80478	3.63768e-08
PFLU_2120	2.09798	2.41168e-06
PFLU_4891	-1.35004	0.0256073
PFLU_2548	-1.8546	0.000140979
PFLU_0487	2.03857	6.70613e-09
PFLU_1161	1.99216	2.41616e-09
PFLU_4038	-2.03089	2.07965e-08
PFLU_5146	-2.09295	2.31358e-05
PFLU_5349	2.09304	7.35768e-07
PFLU_5515	2.09262	8.42279e-09
PFLU_2912	2.09156	7.33136e-07
PFLU_3868	2.09124	9.11689e-05
PFLU_0761	1.95322	5.32309e-10
PFLU_3200	-1.02451	0.00751785
PFLU_3122	1.59161	1.54552e-06
PFLU_3135	-1.92252	1.83011e-07
PFLU_5250	2.0896	2.17041e-05
PFLU_5403	2.08596	7.50842e-06
PFLU_4885	1.0809	0.000751998
PFLU_4685	1.96068	2.25895e-08
PFLU_5026	1.26084	0.000339335
PFLU_0664	1.64216	9.59224e-05
PFLU_5777	1.82504	1.18417e-07
PFLU_4345	1.96014	1.61635e-08
PFLU_1664	-2.0066	3.94392e-09
PFLU_1776	-2.07212	8.97747e-08
PFLU_4695	-2.07124	2.78146e-09
PFLU_1049	1.97093	3.1345e-07
PFLU_5007	1.9079	6.30237e-10
PFLU_4273	2.06886	0.000232673
PFLU_0780	1.90436	3.27193e-08
PFLU_1714	2.03897	1.57464e-09
PFLU_1671	-1.7256	1.95306e-07
PFLU_6026	0.693213	0.00339255
PFLU_3748	-2.06401	8.91785e-10
PFLU_0225	-1.72063	2.48688e-05
PFLU_5816	1.51449	9.85747e-06
PFLU_2555	-1.51268	0.000207079
PFLU_5607	-1.95832	1.2018e-05
PFLU_3173	1.45466	0.000739233
PFLU_1035	-1.07462	0.000120781
PFLU_4624	1.29054	0.00101705
PFLU_2266	-1.99614	2.75783e-09
PFLU_1450	2.05625	7.75891e-07
PFLU_0767	1.96127	1.85431e-08
PFLU_5433	-2.05388	2.96819e-09
PFLU_1653	2.05346	1.0459e-05
PFLU_3759	1.40017	2.10836e-05
PFLU_6039	-2.05269	1.23072e-09
PFLU_0938	-2.04976	4.43543e-06
PFLU_5612	-2.04941	6.70613e-09
PFLU_5704	-1.72427	1.25265e-07
PFLU_4764	1.58069	0.000313413
PFLU_5872	-2.047	6.37186e-10
PFLU_2473	1.27195	0.000714817
PFLU_1998	1.87009	6.70613e-09
PFLU_5011	1.87501	1.55817e-08
PFLU_3153	2.04467	3.96227e-06
PFLU_4507	2.02113	7.10615e-10
PFLU_5099	0.775722	0.114376
PFLU_1206	-1.65689	5.64754e-05
PFLU_5952	1.5614	2.73337e-06
PFLU_1069	2.02942	2.32278e-07
PFLU_2290	-1.67811	1.33978e-09
PFLU_3798	2.03741	2.75328e-07
PFLU_0144	-1.75003	1.15157e-08
PFLU_1220	-2.03088	1.60454e-06
PFLU_4795	-2.02898	4.69607e-08
PFLU_4096	-1.73156	5.72854e-07
PFLU_0899	-2.02586	4.72545e-10
PFLU_4645	-1.80721	1.85431e-08
PFLU_1654	1.27745	0.000955167
PFLU_1558	2.01455	3.48258e-11
PFLU_6007	1.18686	4.49656e-06
PFLU_4362	-1.70667	8.72798e-09
PFLU_3224	-1.93845	2.09447e-09
PFLU_2364	2.02067	1.93719e-05
PFLU_0103	1.57216	4.92157e-05
PFLU_1493	1.91486	5.62886e-07
PFLU_4593	-1.6091	5.61026e-09
PFLU_1715	1.37028	0.00540448
PFLU_2843	-2.01044	8.02521e-07
PFLU_4806	1.57525	6.6785e-05
PFLU_4329	-1.88272	2.63289e-05
PFLU_4627	0.823291	0.0334551
PFLU_2223	-1.59493	3.0106e-07
PFLU_3623	1.91608	2.16174e-07
PFLU_1126	-2.00722	3.12339e-08
PFLU_0143	-1.95348	3.1603e-09
PFLU_6082	-2.00585	5.44102e-09
PFLU_1818	1.72323	1.18417e-07
PFLU_1215	-1.98559	1.75792e-06
PFLU_3198	-0.435137	0.259877
PFLU_1055	1.84376	7.04331e-08
PFLU_4558	-2.00273	2.08123e-10
PFLU_6019	0.193149	0.566052
PFLU_2981	-1.54657	2.3771e-08
PFLU_5411	1.5838	1.52726e-07
PFLU_5994	1.87103	1.68249e-09
PFLU_1369	-1.77433	1.62267e-09
PFLU_2777	1.8347	6.58805e-07
PFLU_5003	1.99277	5.16575e-07
PFLU_0343	-1.45243	2.29472e-06
PFLU_3561	1.99124	1.45467e-05
PFLU_2677	1.99025	6.96157e-07
PFLU_2303	-1.79975	4.31058e-08
PFLU_3952	-1.73936	0.000614347
PFLU_0145	-1.72499	4.54919e-08
PFLU_1999	1.57165	3.00694e-08
PFLU_0031	1.4527	2.54862e-06
PFLU_0838	1.85693	6.42216e-09
PFLU_2322	-1.95908	3.08215e-08
PFLU_5267	1.76046	1.54667e-07
PFLU_1864	1.87744	2.3233e-06
PFLU_1747	-1.97826	4.4828e-11
PFLU_4009	-1.87583	6.25802e-10
PFLU_4861	-1.94864	3.86677e-10
PFLU_1114	-1.9762	3.98021e-10
PFLU_5276	1.97605	1.51884e-07
PFLU_1704	1.91511	1.85989e-09
PFLU_3695	1.97536	0.00148019
PFLU_1413	-1.27361	0.00393133
PFLU_3320	1.97513	0.00121923
PFLU_3391	-1.93316	6.82922e-08
PFLU_2385	-0.98522	0.0122391
PFLU_0253	1.66393	0.00124439
PFLU_1216	1.01076	3.48155e-05
PFLU_0481	1.84066	5.37105e-09
PFLU_3363	1.7436	5.19886e-10
PFLU_3551	-1.70271	5.42377e-08
PFLU_4592	-1.53157	8.19626e-09
PFLU_2244	1.96926	2.4595e-06
PFLU_3753	1.80821	3.32093e-07
PFLU_4634	1.96915	1.22222e-06
PFLU_5273	1.94857	7.74036e-10
PFLU_5371	-1.85657	5.18604e-09
PFLU_2123	-1.9663	8.3449e-08
PFLU_1092	1.96586	0.0199571
PFLU_1854	-1.96585	2.28795e-06
PFLU_3987	-1.96526	2.66579e-05
PFLU_5732	-1.96387	4.21178e-09
PFLU_6008	1.54593	5.45307e-07
PFLU_5844	-1.79813	2.63113e-09
PFLU_5995	1.85109	7.40293e-09
PFLU_4665	-1.58035	1.85406e-07
PFLU_5766	1.96066	1.30882e-07
PFLU_3086	1.34661	2.08579e-05
PFLU_4796	-1.95945	9.51043e-09
PFLU_0277	1.4666	2.54822e-07
PFLU_0825	-1.95648	6.01506e-08
PFLU_4666	-1.55033	1.18823e-06
PFLU_2108	-1.93749	2.95647e-10
PFLU_3585	-0.936442	0.000214587
PFLU_0538	1.85728	1.14669e-09
PFLU_3620	1.32701	0.128794
PFLU_4561	-1.95285	1.80507e-09
PFLU_4316	-1.85589	2.77643e-05
PFLU_4794	-1.68693	0.00151788
PFLU_3174	1.61519	9.97149e-05
PFLU_0862	1.95057	1.28887e-08
PFLU_4748	1.51223	4.10255e-07
PFLU_3431	1.94749	2.07595e-05
PFLU_0867	-1.94551	1.03472e-09
PFLU_4261	1.57648	4.03737e-05
PFLU_1477	1.83084	2.96819e-09
PFLU_0180	-1.5944	8.04319e-08
PFLU_2618	-1.64186	2.70156e-06
PFLU_3315	0.966185	0.021287
PFLU_5996	1.79963	4.8101e-09
PFLU_5209	-1.94133	3.92239e-09
PFLU_1146	1.94104	4.80775e-10
PFLU_2359	1.85364	1.52985e-06
PFLU_3225	-1.93025	8.16097e-09
PFLU_5533	1.87413	1.82223e-09
PFLU_5857	1.62528	0.000126195
PFLU_4594	-1.55815	8.61474e-09
PFLU_4475	1.93741	8.53931e-08
PFLU_1434	1.93735	0.000358651
PFLU_5149	-1.7086	5.39173e-05
PFLU_2607	1.72655	0.000113379
PFLU_5917	-1.12059	1.40609e-05
PFLU_5119	1.82092	2.19047e-06
PFLU_3024	1.93358	3.03165e-08
PFLU_0329	1.93271	1.63501e-05
PFLU_2562	0.227783	0.763704
PFLU_1683	1.93094	1.04152e-05
PFLU_6060	-1.87857	1.39919e-07
PFLU_1209	-1.83133	6.7816e-08
PFLU_5211	-1.92854	1.82223e-09
PFLU_3693	-0.931653	0.000224029
PFLU_1571	-1.9279	7.70162e-10
PFLU_0913	-1.82775	5.15902e-08
PFLU_3975	-1.53781	5.96533e-06
PFLU_1935	1.92453	0.0586972
PFLU_3676	0.913091	0.00746173
PFLU_2745	-1.86965	7.75891e-07
PFLU_1370	-1.74469	2.65265e-09
PFLU_2301	1.20204	1.68797e-05
PFLU_2332	1.91897	2.45475e-05
PFLU_2221	-1.32079	1.90293e-05
PFLU_1292	-1.71221	1.43731e-06
PFLU_0166	-1.7056	1.52985e-06
PFLU_4270	1.91401	1.37057e-05
PFLU_0568	1.91347	2.56562e-07
PFLU_0020	-1.68416	9.87551e-09
PFLU_0947	-1.91103	5.22514e-08
PFLU_1996	1.89737	1.04616e-06
PFLU_0075	1.744	2.12536e-07
PFLU_6017	1.15913	1.28436e-05
PFLU_3097	0.488588	0.0158209
PFLU_4266	1.90481	0.00180745
PFLU_4825	-1.67291	8.49366e-09
PFLU_4275	1.90444	1.76747e-05
PFLU_1596	-1.85005	5.89657e-06
PFLU_1226	1.72786	6.65965e-08
PFLU_3684	-1.90251	1.10234e-08
PFLU_0476	1.70965	2.86804e-07
PFLU_2996	1.90211	9.41403e-06
PFLU_1260	-1.90145	6.86539e-09
PFLU_2162	-1.90138	6.11429e-07
PFLU_1261	-1.90084	6.80495e-09
PFLU_1476	1.89252	2.71015e-08
PFLU_4256	-1.69754	3.79443e-07
PFLU_2572	-1.82855	1.63272e-08
PFLU_0768	1.66931	2.28798e-08
PFLU_0770	1.89759	4.02907e-08
PFLU_6016	0.734429	0.0493301
PFLU_5555	1.89658	2.30845e-06
PFLU_1045	-1.41751	0.0043935
PFLU_5474	1.73966	8.44156e-07
PFLU_3740	-1.8962	4.69372e-08
PFLU_4268	1.89597	0.000309674
PFLU_5469	1.89485	1.34202e-07
PFLU_4860	-1.89414	8.8465e-11
PFLU_1102	-1.89335	7.11631e-08
PFLU_4588	-1.89157	1.43677e-10
PFLU_0712	-1.65774	0.00817491
PFLU_4313	1.89065	4.21178e-09
PFLU_0105	1.6248	3.9174e-05
PFLU_5024	1.15397	0.00114754
PFLU_0757	-1.88978	4.6391e-06
PFLU_3513	1.88952	2.88289e-08
PFLU_6075	1.7983	4.65723e-08
PFLU_5771	1.85806	1.6426e-05
PFLU_1254	-1.88756	2.18075e-09
PFLU_0139	-1.66079	6.92523e-09
PFLU_3194	-0.620059	0.0880092
PFLU_1807	-1.88462	7.86932e-05
PFLU_5043	1.7757	6.64823e-10
PFLU_5372	-1.88329	2.8747e-09
PFLU_3087	1.20288	0.000195875
PFLU_0561	1.30381	0.00131814
PFLU_3925	1.37058	1.22148e-07
PFLU_3096	0.330395	0.0672356
PFLU_1592	1.87971	0.00021232
PFLU_5846	-1.79556	1.18417e-07
PFLU_3749	-1.71479	8.04081e-07
PFLU_5831	1.8755	2.39872e-07
PFLU_1105	1.87371	2.03236e-08
PFLU_5309	-1.8147	6.27106e-09
PFLU_4830	-1.79729	8.05975e-07
PFLU_2962	1.13598	0.087449
PFLU_4578	1.8145	1.46052e-09
PFLU_5219	1.7515	6.67797e-08
PFLU_0932	1.40462	5.10049e-07
PFLU_3707	-1.58104	6.71248e-05
PFLU_5780	1.71638	4.98018e-09
PFLU_0034	1.18781	0.000175311
PFLU_5421	1.85952	6.86048e-08
PFLU_1614	1.84624	7.58782e-06
PFLU_4309	-1.8573	4.85286e-06
PFLU_3852	-1.63598	1.80896e-05
PFLU_4674	1.57867	0.00130158
PFLU_0113	1.81196	2.80868e-08
PFLU_4522	1.85515	1.91442e-07
PFLU_5684	1.85505	2.7243e-07
PFLU_3036	-1.76242	5.18493e-08
PFLU_2267	-1.69444	1.81871e-08
PFLU_1478	1.70181	1.37013e-08
PFLU_1565	1.73767	3.27726e-08
PFLU_0927	-1.83411	2.0369e-09
PFLU_1223	-1.84774	1.06744e-08
PFLU_5482	0.905132	0.00289319
PFLU_2635	1.84663	4.25258e-06
PFLU_3767	1.28084	0.00195381
PFLU_2027	1.32178	1.01192e-06
PFLU_1601	-1.7877	1.66996e-08
PFLU_5736	-1.45873	1.55417e-05
PFLU_0227	1.57691	0.000341728
PFLU_3958	-1.42496	0.000567194
PFLU_5678	-1.46	1.14471e-06
PFLU_4036	1.16854	0.000224813
PFLU_2599	1.84352	0.00391506
PFLU_5062	-1.84051	2.47978e-08
PFLU_4898	-1.65363	7.10615e-10
PFLU_6120	0.870016	2.81731e-05
PFLU_3098	0.300016	0.19014
PFLU_5735	-1.33219	1.8308e-05
PFLU_3412	-1.73896	1.39254e-06
PFLU_2980	-1.38119	1.91853e-06
PFLU_0488	1.83276	0.0022942
PFLU_0485	-1.83207	2.66116e-09
PFLU_3690	-1.47496	0.000311464
PFLU_2793	1.83039	9.26428e-08
PFLU_1246	-1.72603	5.97616e-07
PFLU_4772	1.68465	1.0506e-07
PFLU_0800	-1.48166	1.73187e-07
PFLU_0928	-1.82884	1.57689e-07
PFLU_2964	1.09879	0.0784103
PFLU_0976	1.32154	1.32465e-05
PFLU_1211	-1.82774	2.14869e-07
PFLU_4188	1.70739	1.0445e-07
PFLU_5842	-1.61263	1.34202e-07
PFLU_5938	1.8256	3.26346e-06
PFLU_4855	1.72986	2.91845e-08
PFLU_2486	-1.82329	1.18697e-08
PFLU_1291	1.58235	4.2673e-08
PFLU_3317	0.918733	0.00629518
PFLU_1308	-1.81781	2.79755e-09
PFLU_2150	-1.77762	1.089e-07
PFLU_3491	1.2393	0.00198479
PFLU_1374	-1.79847	1.1681e-07
PFLU_3374	-1.79186	1.11229e-06
PFLU_2984	1.81134	2.69899e-07
PFLU_3965	-1.64155	7.84533e-07
PFLU_3721	1.80942	0.000149317
PFLU_0339	1.32695	0.000152198
PFLU_0266	1.75925	8.1756e-10
PFLU_2991A	1.68084	1.58017e-09
PFLU_1309	-1.63566	2.82724e-07
PFLU_3977	-1.19619	0.00113202
PFLU_3661	0.860023	0.0320889
PFLU_0112	1.57125	0.000110484
PFLU_5332	-1.80225	2.10587e-08
PFLU_0455	1.80203	1.33457e-08
PFLU_0593	-1.38008	1.01192e-06
PFLU_4324	-1.71228	0.000879085
PFLU_4926	1.75249	9.04123e-07
PFLU_2564	-1.79827	2.58888e-06
PFLU_5973	1.79989	7.5049e-07
PFLU_6055	1.61597	1.0753e-06
PFLU_1806	1.56851	5.16399e-05
PFLU_3216	-1.54072	0.000730218
PFLU_2956	1.79898	0.0365367
PFLU_0311	1.51768	6.06131e-06
PFLU_3653	-1.7982	3.90744e-08
PFLU_2070	-1.79818	6.5325e-08
PFLU_2425	-1.22922	0.00181719
PFLU_3617	1.79683	3.02757e-06
PFLU_2433	-0.574536	0.00808612
PFLU_0941	-1.79607	5.50785e-08
PFLU_0815	1.75428	0.000250562
PFLU_4564	-1.79258	1.84426e-08
PFLU_1976	-1.53066	5.58193e-06
PFLU_1389	1.78902	3.307e-06
PFLU_3488	-1.78742	2.76417e-09
PFLU_1793	-1.34609	3.03746e-06
PFLU_0307	0.770916	0.0800063
PFLU_0071	1.78594	7.46718e-06
PFLU_4476	-1.78558	4.48213e-07
PFLU_2850	-1.72828	0.00121295
PFLU_3574	-1.06005	0.00182039
PFLU_4064	-0.736358	0.321446
PFLU_0400	1.71031	1.25854e-05
PFLU_0831	-1.78259	2.78001e-08
PFLU_0016	1.7825	2.49297e-07
PFLU_3226	-1.50993	1.77262e-06
PFLU_1419	-1.78227	3.34983e-06
PFLU_0934	1.78142	0.000847229
PFLU_3197	-0.773876	0.112155
PFLU_5217	1.77984	7.20063e-08
PFLU_0158	1.67173	0.019894
PFLU_3894	-1.77783	3.32862e-08
PFLU_3501	-1.71904	0.000127546
PFLU_4211	0.979837	2.68935e-05
PFLU_3930	1.58779	2.01745e-08
PFLU_3951	-1.77625	4.26842e-07
PFLU_1759	-1.77346	1.73402e-09
PFLU_1001	-1.62334	1.25495e-07
PFLU_3141	-1.36449	4.10255e-07
PFLU_1666	-1.68363	1.06715e-08
PFLU_3085	1.04799	0.000583589
PFLU_5350	1.76853	2.57549e-06
PFLU_4603	1.74251	8.16097e-09
PFLU_3476	0.77893	0.00311268
PFLU_3658	0.887609	0.00188238
PFLU_3353	-1.60835	1.25088e-08
PFLU_4769	-1.71904	9.43673e-05
PFLU_5352	-1.58859	3.61698e-08
PFLU_3277	1.76159	5.78663e-08
PFLU_4947	-1.76133	1.93719e-05
PFLU_1539	1.7605	3.53688e-07
PFLU_1758	1.76013	0.000362771
PFLU_0591	-1.75965	6.69394e-05
PFLU_4749	1.29535	1.0723e-07
PFLU_0873	-1.3278	0.000154132
PFLU_0531	-1.75591	6.54227e-09
PFLU_0776	-1.08599	1.39438e-05
PFLU_1253	-1.75358	1.57642e-09
PFLU_0295	-1.51973	2.41168e-06
PFLU_2043	-1.75201	0.000451062
PFLU_0954	0.516983	0.106624
PFLU_2723	-1.75105	2.47978e-08
PFLU_4500	1.69256	4.6802e-07
PFLU_4863	-1.63171	1.45968e-06
PFLU_3613	1.74741	3.12259e-06
PFLU_4519	1.74736	3.66816e-07
PFLU_3305	-0.711386	0.00873134
PFLU_1519	1.70082	9.33056e-08
PFLU_5796	-1.74562	2.31804e-08
PFLU_3615	1.74284	2.73126e-06
PFLU_2550	-1.36744	0.000725423
PFLU_5027	1.01576	0.00101948
PFLU_3393	-1.74098	8.14869e-07
PFLU_3793	1.44472	0.00109426
PFLU_5257	1.73728	6.18095e-07
PFLU_0590	-1.172	0.00200633
PFLU_3510	-1.62944	1.67276e-07
PFLU_5611	-1.73379	2.65265e-09
PFLU_0093	1.72545	3.6627e-06
PFLU_3335	-1.65782	1.34817e-07
PFLU_5847	-1.48095	6.43306e-06
PFLU_4135	1.731	0.00723461
PFLU_2443	1.73093	7.74873e-06
PFLU_4380	0.879868	4.39631e-05
PFLU_3614	1.73013	1.96087e-05
PFLU_5229	-1.72816	6.60816e-07
PFLU_0148A	1.72991	0.0159318
PFLU_2086	-1.72959	1.5122e-10
PFLU_1878	1.49143	7.47676e-06
PFLU_1665	-1.48128	2.71418e-06
PFLU_1066	1.59718	7.35511e-05
PFLU_0191	-1.5193	2.58348e-07
PFLU_2371	1.66341	3.99052e-06
PFLU_1767	1.72367	2.67475e-08
PFLU_6122	0.924387	3.9839e-06
PFLU_3633	-0.638889	0.0014824
PFLU_0837	1.72107	1.85989e-09
PFLU_0467	1.10445	0.0024144
PFLU_3301	1.67269	2.7143e-08
PFLU_3134	1.71795	1.05385e-06
PFLU_3316	1.01892	0.000535586
PFLU_0944	-1.71593	8.46254e-08
PFLU_1896	1.71466	2.45922e-06
PFLU_4682	1.40888	7.5049e-07
PFLU_5162	1.65144	1.75698e-08
PFLU_2082	-1.7121	4.04008e-07
PFLU_2219	-1.27351	8.92417e-06
PFLU_1823	1.40126	1.40492e-07
PFLU_3160	1.71054	3.67665e-08
PFLU_2804	-1.62663	2.69423e-08
PFLU_1265	1.56641	1.14471e-06
PFLU_2304	-1.68326	2.35375e-09
PFLU_4523	1.70969	4.7161e-08
PFLU_1015	-0.890668	0.0313576
PFLU_2331	1.70786	2.86697e-05
PFLU_2546	-1.67259	1.57654e-08
PFLU_4649	-1.19252	0.0289388
PFLU_0850	1.02489	0.00113348
PFLU_0713	-1.70185	0.00119925
PFLU_0325	-1.69945	8.46254e-08
PFLU_4322	1.6987	3.34983e-06
PFLU_3414	-1.6976	9.05146e-07
PFLU_0562	1.38795	0.000124618
PFLU_3445	-1.26165	2.01972e-05
PFLU_3640	1.6958	3.40263e-05
PFLU_4745	-1.43753	1.00563e-09
PFLU_6095	1.56087	3.307e-06
PFLU_5637	1.56426	4.72082e-06
PFLU_5472	1.54515	1.89337e-07
PFLU_1234	1.69234	0.000331968
PFLU_4264	1.6912	0.000213136
PFLU_4787	-1.52085	6.60696e-05
PFLU_2031	-1.69065	1.93746e-07
PFLU_2360	-1.48277	2.69399e-07
PFLU_2178	-1.69005	8.01951e-05
PFLU_5323	-1.43168	8.04081e-07
PFLU_1448	1.68715	0.000311045
PFLU_1667	-1.6864	7.96408e-08
PFLU_1727	1.68567	9.33644e-05
PFLU_3964	-1.40929	1.07037e-06
PFLU_5073	1.4166	2.06287e-06
PFLU_1694	-1.16817	0.000539478
PFLU_1827	1.61521	0.0002579
PFLU_5377	1.63608	4.43804e-07
PFLU_2135	1.61316	1.5003e-08
PFLU_2270	-1.68075	1.9723e-09
PFLU_4163	1.47886	1.1314e-05
PFLU_4181	-1.67903	3.98482e-09
PFLU_3535	1.57162	2.16174e-07
PFLU_4890	-0.986963	0.0274376
PFLU_5984	1.6771	1.21725e-05
PFLU_4884	-1.63001	1.54638e-08
PFLU_1726	1.32601	2.02401e-05
PFLU_2621	-1.52531	1.85314e-06
PFLU_1111	-1.67445	3.57134e-07
PFLU_3709	1.67375	1.34194e-07
PFLU_3223	-1.60776	8.46254e-08
PFLU_2676	1.44874	2.7143e-08
PFLU_4389	-1.67294	0.000315508
PFLU_5645	1.67289	1.93719e-05
PFLU_0521	-1.67212	1.02621e-09
PFLU_2654	1.41599	0.000296375
PFLU_3588	-1.16707	0.00011587
PFLU_2021	-1.67146	9.50598e-07
PFLU_5579	-1.671	5.59081e-08
PFLU_2824	1.66828	0.000811808
PFLU_1148	-1.44493	0.000447471
PFLU_2242	1.66667	2.18729e-08
PFLU_0495	-1.46455	7.34051e-08
PFLU_0931	-1.61244	3.0203e-08
PFLU_4718	-1.66552	4.44594e-09
PFLU_1720	1.4251	5.1204e-06
PFLU_4274	1.66245	0.00139559
PFLU_1018	-1.57149	9.65883e-09
PFLU_4297	-1.65618	2.18051e-06
PFLU_0109	0.769444	0.10619
PFLU_4128D	-1.58177	1.16209e-07
PFLU_3545	-1.15131	0.0536081
PFLU_0733	1.6407	3.49906e-06
PFLU_3196	-0.710557	0.053459
PFLU_3806	-1.56079	7.73306e-06
PFLU_0779	1.27252	1.91442e-07
PFLU_0223	-0.480732	0.107978
PFLU_1881	-1.6573	1.52726e-07
PFLU_3050	-1.65601	9.4291e-06
PFLU_5147	1.01341	0.0330407
PFLU_4128C	-1.65399	8.04319e-08
PFLU_2733	-1.65217	1.36349e-08
PFLU_2994	-1.55962	1.28734e-05
PFLU_5434	-1.58585	5.49456e-08
PFLU_3222	-1.34736	7.07873e-06
PFLU_3896	-1.64683	3.49041e-08
PFLU_2731	-1.37302	3.57246e-05
PFLU_3109	1.48455	4.99847e-05
PFLU_3775	-0.960564	7.3073e-05
PFLU_2421	-0.995228	0.0379785
PFLU_0022	1.60628	3.26838e-09
PFLU_1672	-1.60666	4.10255e-07
PFLU_1868	1.43541	4.54627e-07
PFLU_1332	-1.6437	3.26835e-09
PFLU_5314	-1.36863	3.31839e-07
PFLU_2698	-0.652719	0.0635424
PFLU_0898	-1.58275	3.73143e-09
PFLU_3387	-1.64216	7.3073e-05
PFLU_1505	-1.41023	3.84797e-07
PFLU_0240	-0.812681	0.0120062
PFLU_3926	1.64065	8.3449e-08
PFLU_5458	-1.6225	6.91763e-06
PFLU_2568	-1.63934	9.64416e-08
PFLU_1640	1.63898	1.21849e-08
PFLU_5415	-1.49312	1.97929e-08
PFLU_2846	-1.53906	5.48595e-07
PFLU_3946	1.08712	0.000538216
PFLU_2620	-1.3445	2.28824e-05
PFLU_2596	1.33845	0.00452399
PFLU_6104	1.56502	3.40052e-07
PFLU_3855	-1.55173	0.000354767
PFLU_4122A	1.63303	7.64789e-06
PFLU_2333	1.63252	0.000243647
PFLU_0830	-1.4112	3.48666e-06
PFLU_1582	-1.3805	3.19864e-08
PFLU_2164	-1.63082	5.73461e-05
PFLU_3478	-1.51797	3.44993e-05
PFLU_3873	1.4702	3.02518e-08
PFLU_6013	0.0747981	0.727761
PFLU_3236	1.62614	9.62968e-06
PFLU_5964	-1.62565	3.19251e-09
PFLU_4791	-1.55847	5.49834e-09
PFLU_2737	1.3203	8.75992e-06
PFLU_3265	-1.44297	5.02105e-06
PFLU_0203	1.29238	0.00449689
PFLU_0727	-1.37818	0.00065937
PFLU_0527	-1.21789	6.51459e-05
PFLU_1311	-1.29001	2.90046e-06
PFLU_0211	1.62072	1.06438e-07
PFLU_1156	1.48581	4.63723e-08
PFLU_3632	-0.905643	0.00285939
PFLU_0479	1.61907	7.64883e-07
PFLU_0140	-1.60707	2.72834e-09
PFLU_0003	1.40814	5.4454e-07
PFLU_5117	1.18932	0.00940272
PFLU_2766	1.48286	2.71015e-08
PFLU_0634	1.40874	4.63163e-06
PFLU_2721	1.3029	0.00949569
PFLU_3392	-1.54841	8.64721e-08
PFLU_6119	0.557814	0.000253599
PFLU_5355	1.6132	1.11827e-08
PFLU_3235	1.61263	7.89271e-05
PFLU_4193	1.42026	1.48053e-08
PFLU_5710	1.61199	0.000325322
PFLU_0394	-1.49876	1.14128e-07
PFLU_4959	1.55371	8.53278e-07
PFLU_6072	1.47751	3.8596e-05
PFLU_4553	-0.43466	0.576971
PFLU_2155	-1.51274	6.0001e-08
PFLU_4074	1.60779	0.0294123
PFLU_4391	-1.60768	1.74889e-08
PFLU_5463	1.41057	0.000185583
PFLU_5136	1.14712	0.000120781
PFLU_5025	1.07316	0.00391506
PFLU_5712	1.39791	7.76503e-08
PFLU_2449	1.54851	0.0019154
PFLU_1467	1.60592	2.36045e-05
PFLU_4068	-0.905432	0.0083601
PFLU_1608	-1.235	0.00425645
PFLU_2386	-1.51675	2.0807e-06
PFLU_4808	-1.60184	3.30096e-09
PFLU_4897	-1.60108	4.68851e-07
PFLU_1135	-1.60068	1.11559e-07
PFLU_1214	-1.48563	0.000130538
PFLU_1699	1.40901	7.09115e-07
PFLU_4896	-1.58336	7.91824e-05
PFLU_0663	1.32166	1.22011e-05
PFLU_0213	-0.830561	0.00019953
PFLU_5015	1.47505	7.04434e-06
PFLU_5328	1.44383	2.26133e-05
PFLU_1494	1.43308	5.86447e-05
PFLU_4683	1.35119	2.68935e-05
PFLU_6066	-1.58763	7.16767e-05
PFLU_1300	1.56047	2.20453e-07
PFLU_2047	-1.16995	0.00982367
PFLU_5889	-1.4568	9.89598e-07
PFLU_2675	1.40475	6.60752e-08
PFLU_5603	1.54571	2.70415e-06
PFLU_5338	-1.30504	0.000722264
PFLU_6130	-0.664832	0.00965018
PFLU_3155	1.58996	1.62466e-07
PFLU_1612	0.576038	0.256786
PFLU_3673	1.13784	0.000144402
PFLU_3500	-1.56193	0.000326776
PFLU_0251	1.4821	4.3498e-07
PFLU_2330	0.396843	0.313126
PFLU_5189	-1.40689	1.06e-06
PFLU_4222	-1.31886	0.000272273
PFLU_2156	-1.31868	2.62706e-06
PFLU_1606	-1.44856	2.23119e-06
PFLU_4539	1.51024	2.60607e-08
PFLU_3383	1.24642	0.000198595
PFLU_4859	-1.5822	8.00648e-08
PFLU_0265	1.58052	3.57134e-07
PFLU_2870	1.57803	1.40673e-05
PFLU_1012	-0.59349	0.439873
PFLU_5306	1.57726	0.000931528
PFLU_2615	0.0664072	0.877151
PFLU_4809	1.57046	6.16614e-07
PFLU_5072	1.56963	3.14322e-08
PFLU_5168	1.43971	1.14532e-08
PFLU_1520	-1.53854	3.14872e-08
PFLU_1940	1.57414	0.000140899
PFLU_4712	1.57319	4.07175e-06
PFLU_5546	1.4225	1.34202e-07
PFLU_4114	1.57229	2.71649e-06
PFLU_2509A	1.17312	0.0122239
PFLU_2256	1.51833	0.000185357
PFLU_4611	1.56989	0.00135832
PFLU_4902	1.48762	9.12758e-09
PFLU_0041	0.946766	7.99073e-06
PFLU_2029	-1.47773	7.79051e-07
PFLU_2281	-1.34573	6.98887e-05
PFLU_4966	-1.56389	3.5869e-05
PFLU_0437	1.56268	5.50168e-08
PFLU_4449	-1.50347	1.0129e-07
PFLU_1212	-1.53685	4.20502e-07
PFLU_0558	1.46194	1.30987e-05
PFLU_2653	1.55989	3.89271e-07
PFLU_1468	1.31086	9.72208e-05
PFLU_3843	1.40003	0.000568537
PFLU_0183	1.55704	2.22509e-05
PFLU_3512	1.24591	0.00038574
PFLU_1824	1.13392	2.64388e-06
PFLU_3033	1.25007	0.023309
PFLU_1030	-1.55581	9.39861e-08
PFLU_1591A	-1.31893	7.4306e-05
PFLU_3217	-1.28958	0.000196525
PFLU_4647	1.28102	1.35867e-06
PFLU_2462	1.51396	0.000555778
PFLU_5223	1.32429	3.09074e-07
PFLU_2136	0.916439	0.000151694
PFLU_4980	0.868567	0.0130122
PFLU_1639	1.5521	1.32325e-07
PFLU_0344	-0.954686	1.93719e-05
PFLU_4078	1.55084	0.0089361
PFLU_4296	-1.38983	0.000890259
PFLU_4291	1.54755	5.65441e-05
PFLU_4904	1.31721	1.55641e-06
PFLU_5782	1.29032	4.87317e-05
PFLU_2969	-1.27084	8.22307e-06
PFLU_0849	1.34031	0.000373332
PFLU_4950	1.54529	7.6737e-08
PFLU_2559	-1.41512	8.44319e-06
PFLU_3750	-1.21268	3.49881e-05
PFLU_4394	-1.41897	3.05094e-08
PFLU_0640	-1.40689	2.87417e-06
PFLU_1325	1.4627	1.76428e-07
PFLU_3916	1.39166	8.36404e-06
PFLU_6103	0.834664	0.0249306
PFLU_4228	1.38684	1.93719e-05
PFLU_4684	1.21801	8.31346e-06
PFLU_0133	1.40187	1.42069e-06
PFLU_6123	0.792913	6.6785e-05
PFLU_1835	-1.53752	4.89974e-07
PFLU_6051	1.40324	5.29987e-08
PFLU_5707	1.42855	1.16291e-07
PFLU_4515	-1.28129	0.000297939
PFLU_1917	1.47519	0.000295267
PFLU_2276	-0.770545	0.229065
PFLU_1145	1.41311	5.49091e-08
PFLU_0616	1.29009	0.000110602
PFLU_2886	1.53304	0.0279369
PFLU_3428	-1.48815	9.44049e-07
PFLU_3011	-1.23748	0.0042639
PFLU_4845	0.466182	0.0165063
PFLU_2337	-0.284918	0.209423
PFLU_3780	1.28128	0.000947374
PFLU_4251	-1.52316	6.99979e-09
PFLU_0407	-1.52875	2.83261e-07
PFLU_3521	-1.36019	1.40784e-06
PFLU_3357	0.242152	0.630243
PFLU_4091	1.42849	0.00088829
PFLU_2453	0.861017	0.0192617
PFLU_1627	-1.08714	3.4143e-05
PFLU_4160	-1.52515	1.81669e-05
PFLU_1011	-1.08053	0.00645695
PFLU_0137	-1.4157	7.84971e-07
PFLU_4361	-1.31699	1.62303e-06
PFLU_5656	-1.52428	1.76129e-07
PFLU_2673	-1.47521	2.04053e-07
PFLU_2034	-1.35113	1.09215e-06
PFLU_3490	1.52319	6.4866e-06
PFLU_6088	0.998292	0.00747522
PFLU_0055	-1.3895	1.22848e-07
PFLU_4003	-1.2784	0.0147052
PFLU_5262	1.4917	9.55991e-08
PFLU_3183	1.51989	0.000106048
PFLU_5311	-1.51852	2.23269e-06
PFLU_5888	-1.5182	0.00201329
PFLU_3203	-1.47947	1.91886e-07
PFLU_5853	1.51731	0.0004783
PFLU_0861	1.37397	6.45045e-08
PFLU_0382	-1.5169	4.37359e-09
PFLU_1473	1.28897	0.000152109
PFLU_3888	-0.921292	1.0943e-05
PFLU_1848	-1.51492	1.55497e-08
PFLU_4080	1.3277	0.000281816
PFLU_2935	-1.30858	3.46531e-07
PFLU_3148	-0.97805	0.00127838
PFLU_5685	1.51118	6.00566e-08
PFLU_1870	1.5108	8.92417e-06
PFLU_1269	1.40927	7.14747e-08
PFLU_3495	0.354701	0.654709
PFLU_3084	0.781933	0.00581016
PFLU_2525	0.820802	0.378653
PFLU_6040	-1.40565	1.72197e-05
PFLU_1400	-1.45706	8.66646e-08
PFLU_0288	-1.46443	2.55558e-08
PFLU_5662	0.837941	0.0059393
PFLU_2913	1.44014	2.54444e-08
PFLU_4596	-1.50606	3.49554e-07
PFLU_4538	1.40882	2.94791e-07
PFLU_4182	-1.50421	2.69732e-09
PFLU_1367	1.04389	0.000385631
PFLU_3497	-0.214656	0.785219
PFLU_5711	1.42419	6.67447e-06
PFLU_4970	-1.0309	0.00649377
PFLU_6035	1.08797	0.00428364
PFLU_5402	1.50267	3.16457e-08
PFLU_3550	-1.14851	5.21708e-05
PFLU_2582	1.4373	4.29754e-06
PFLU_3861	1.42309	0.00074948
PFLU_0929	-1.50088	5.20561e-07
PFLU_5864	1.27405	2.3156e-05
PFLU_3267	1.49931	0.000955013
PFLU_0559	1.21457	0.000218761
PFLU_3774	1.39932	3.1427e-05
PFLU_4686	1.49518	1.1636e-07
PFLU_1449	0.992686	0.00042784
PFLU_3803	-1.34721	1.71868e-05
PFLU_0279	1.05691	0.00317649
PFLU_3218	-1.43378	8.80002e-08
PFLU_4153	-1.15298	0.00133623
PFLU_5575	1.19538	6.46554e-07
PFLU_5160	1.42392	0.000162185
PFLU_0222	-0.0454945	0.887084
PFLU_1475	1.22268	2.64527e-05
PFLU_0097	-1.49182	0.000124639
PFLU_4075	1.49092	0.0281775
PFLU_0138	-1.49076	0.00809558
PFLU_3477	-1.48988	1.41009e-07
PFLU_4563	-1.48971	3.17148e-08
PFLU_0819	-1.38736	5.67386e-08
PFLU_0095	-1.45088	0.000173042
PFLU_1371	-1.32317	5.31232e-07
PFLU_6074	1.48705	1.39919e-07
PFLU_2119	1.48661	2.64912e-05
PFLU_3900	-1.48645	1.3979e-05
PFLU_1472	1.39942	3.74867e-09
PFLU_0205	1.44596	0.0010038
PFLU_5436	-1.48535	3.84072e-05
PFLU_6124	0.79528	0.000252918
PFLU_5419	0.897096	6.82214e-05
PFLU_4047	-1.17638	0.000127573
PFLU_2046	-1.23388	0.0337722
PFLU_6037	-1.48149	1.93021e-07
PFLU_5342	-1.48064	3.5077e-07
PFLU_2756	1.32338	8.25508e-05
PFLU_4043	-0.798443	0.00385106
PFLU_0700	0.909128	0.0989934
PFLU_3502	-1.48011	1.25948e-05
PFLU_1054	1.3007	4.35906e-06
PFLU_5357	-1.16228	0.0146604
PFLU_5404	1.38918	3.11406e-08
PFLU_5591	-1.47588	1.1114e-06
PFLU_1997	1.17722	1.11093e-05
PFLU_1295	1.19102	2.46102e-05
PFLU_5161	1.39453	2.64557e-05
PFLU_4308	-1.47729	2.44247e-07
PFLU_4008	-1.47708	5.40854e-06
PFLU_0502	1.36824	1.89793e-08
PFLU_3538	1.02638	0.0084885
PFLU_2892	-1.2127	5.62886e-07
PFLU_5088	-1.347	2.84503e-07
PFLU_5785	-1.47379	3.09518e-08
PFLU_5648	0.733294	0.00443799
PFLU_3311	0.913946	8.25412e-05
PFLU_2693	-1.15906	2.14961e-06
PFLU_2109	-1.04512	4.93672e-05
PFLU_0888	1.16909	0.000346901
PFLU_4312	1.29362	8.46254e-08
PFLU_5195	0.714264	0.00676874
PFLU_2787	-0.785544	0.00944435
PFLU_1967	1.46836	0.000287864
PFLU_5461	1.14842	4.40157e-05
PFLU_2879	-0.944973	0.0562383
PFLU_3814	1.25253	0.00349429
PFLU_5619	1.3695	1.089e-07
PFLU_2022	-1.14436	2.40522e-06
PFLU_0162	0.926533	0.000636368
PFLU_3398	1.25014	0.0364141
PFLU_0165	0.617704	0.0417573
PFLU_2659	-1.437	1.09851e-06
PFLU_0136	-1.46256	1.40097e-06
PFLU_0463	1.32332	3.01693e-05
PFLU_5854	1.09308	0.000489567
PFLU_4763	1.28021	1.55792e-06
PFLU_1195	-1.46051	2.55303e-09
PFLU_1655	0.50303	0.029156
PFLU_3470	-1.33628	2.4103e-06
PFLU_4077	0.923458	0.0980656
PFLU_3541	-1.32452	2.64527e-05
PFLU_3882	1.45919	9.53374e-07
PFLU_2353	1.00541	1.99426e-05
PFLU_2289	0.352622	0.11246
PFLU_2277	-0.304929	0.219229
PFLU_1528	1.3175	1.31616e-06
PFLU_3966	-1.31496	1.40143e-06
PFLU_5142	-0.138331	0.757486
PFLU_0106	1.30603	1.69297e-05
PFLU_0300	-1.41481	5.84294e-06
PFLU_2397	1.45319	4.08749e-06
PFLU_3185	1.45238	9.55012e-06
PFLU_0739	1.26993	1.87049e-07
PFLU_4838	-1.4203	2.39508e-07
PFLU_5337	1.38594	7.47983e-06
PFLU_0448	1.40881	2.63405e-05
PFLU_1451	-1.45011	4.05462e-06
PFLU_3893	-1.45009	2.3478e-07
PFLU_0783	-1.44997	3.82709e-08
PFLU_5492	1.44988	4.46964e-06
PFLU_4032	1.44771	0.000413548
PFLU_0337	1.44758	4.521e-07
PFLU_5663	0.735111	0.0132234
PFLU_0798	1.11932	6.06125e-05
PFLU_2105	-1.33936	7.20354e-06
PFLU_0953	-1.36282	3.8985e-06
PFLU_2822	1.44383	0.00537594
PFLU_3720	1.4436	0.000140906
PFLU_3071	1.15642	0.000289474
PFLU_3921	1.32393	1.74462e-08
PFLU_5384	1.39878	5.13274e-05
PFLU_3563	-1.40222	7.45104e-06
PFLU_1099	-1.43944	1.59082e-05
PFLU_5348	1.44149	9.55854e-05
PFLU_4667	-1.13607	0.00015668
PFLU_5930	-1.44073	8.747e-08
PFLU_3939	1.37199	1.25021e-05
PFLU_4331	1.43945	3.28974e-06
PFLU_0617	-0.9735	0.000270323
PFLU_3934	-1.32587	0.00404418
PFLU_2844	1.35706	1.19282e-06
PFLU_1219	-1.43465	6.01356e-09
PFLU_0472	1.35897	0.00114808
PFLU_1118	-1.43441	5.41437e-08
PFLU_1921	1.43396	0.00394049
PFLU_4125	-1.29061	0.000130999
PFLU_2280	-1.41956	6.7644e-06
PFLU_6073	1.20315	1.00973e-06
PFLU_0013	1.30724	4.21733e-06
PFLU_4837	-1.43192	4.87783e-06
PFLU_3378	-0.531625	0.00290089
PFLU_1424	1.43144	2.65468e-07
PFLU_1805	1.37444	2.10469e-06
PFLU_3698	-0.707143	0.0216195
PFLU_3403	-1.38887	4.56211e-07
PFLU_1880	-1.42892	9.59697e-07
PFLU_3128	-1.4275	0.000310685
PFLU_4204	1.42712	4.54534e-08
PFLU_0412	1.2933	4.46861e-08
PFLU_2145	1.42646	4.34983e-07
PFLU_0018	1.27314	5.85714e-08
PFLU_5721	1.05574	4.63107e-05
PFLU_1338	-1.35159	5.74988e-05
PFLU_5116	0.969797	0.00597293
PFLU_1447	1.29827	4.42475e-06
PFLU_0270	-1.42509	1.80507e-09
PFLU_2018	-1.36884	0.0606815
PFLU_1329	1.38348	4.25822e-06
[truncated: 1,035 more rows]

## Sheet: F
Geneid	che.ti.5dpi.logFC	che.ti.5dpi.FDR
PFLU_2686	-0.235883	0.998188
PFLU_1128	-0.920927	0.954437
PFLU_0660	-0.0603161	0.998188
PFLU_1129	-0.937254	0.922796
PFLU_2738	-0.0222579	0.998391
PFLU_1127	-0.603159	0.990668
PFLU_3106	0.305307	0.998188
PFLU_3358	0.0854094	0.998188
PFLU_1598	-0.194125	0.998188
PFLU_1577	-0.358974	0.856365
PFLU_2054	0.0189163	0.998391
PFLU_2295	-0.0342462	0.998188
PFLU_0596	-0.858793	0.990668
PFLU_1122	-0.0674093	0.998188
PFLU_4818	0.267919	0.922796
PFLU_2125	0.251595	0.998188
PFLU_2808	0.191965	0.998188
PFLU_1123	-0.548983	0.998188
PFLU_1083	-0.223667	0.998188
PFLU_5861	-0.0902259	0.998188
PFLU_1082	-0.409517	0.998188
PFLU_4340	-0.131728	0.998188
PFLU_4448	0.0708098	0.998188
PFLU_4728	0.103804	0.998188
PFLU_0399	-0.225959	0.990668
PFLU_1124	0.759018	0.998188
PFLU_4447	-0.0233878	0.998391
PFLU_5038	-0.15357	0.998188
PFLU_2296	0.245772	0.998188
PFLU_3427	-0.0108703	0.998391
PFLU_4730	0.214089	0.998188
PFLU_4729	0.0848634	0.998188
PFLU_4569	-0.0152265	0.998391
PFLU_2262	-0.0537095	0.998188
PFLU_3735	0.192115	0.998188
PFLU_4444	0.125756	0.998188
PFLU_4733	-0.0238918	0.998188
PFLU_5113	0.359257	0.998188
PFLU_5608	-0.0888224	0.998188
PFLU_0661	-0.572458	0.998188
PFLU_3841	-0.337152	0.990668
PFLU_1125	-0.218229	0.998188
PFLU_4414	0.0651551	0.998188
PFLU_0916	0.0720142	0.998188
PFLU_1130	0.0660063	0.998188
PFLU_0566	0.326028	0.923089
PFLU_3765A	0.143366	0.998188
PFLU_4551	0.171075	0.998188
PFLU_0595	-0.661877	0.728453
PFLU_4502	-0.134116	0.998188
PFLU_5091	-0.840905	0.871469
PFLU_3047	0.150504	0.998188
PFLU_4452	0.0451949	0.998188
PFLU_1247	0.0115635	0.998391
PFLU_4971	0.203922	0.998188
PFLU_1155	-0.0823875	0.998188
PFLU_1412	-1.03226	0.998188
PFLU_4451	0.0159136	0.998391
PFLU_0658	0.0755186	0.998188
PFLU_4800	0.405123	0.998188
PFLU_3765	0.14034	0.998188
PFLU_1597	0.213479	0.998188
PFLU_4455	0.0897697	0.998188
PFLU_3409	-0.0780765	0.998188
PFLU_0652	-2.63209	0.480161
PFLU_4407	0.0788736	0.998188
PFLU_4731	0.233324	0.998188
PFLU_3379	0.444973	0.932738
PFLU_4417	0.0469581	0.998188
PFLU_2711	-0.10154	0.998188
PFLU_4454	-0.00208264	0.998705
PFLU_5094	-0.190314	0.998188
PFLU_4413	0.0220916	0.998391
PFLU_2308	0.599399	0.922796
PFLU_0966	0.323825	0.998188
PFLU_0509	0.0636357	0.998188
PFLU_1485	0.00196937	0.998705
PFLU_4453	0.0437361	0.998188
PFLU_5039	-0.564211	0.91064
PFLU_5040	-0.530032	0.998188
PFLU_4445	0.309303	0.998188
PFLU_0117	0.0345248	0.998188
PFLU_5095	0.226193	0.998188
PFLU_2358	0.247306	0.998188
PFLU_5037	-0.297834	0.998188
PFLU_4442	0.0684859	0.998188
PFLU_4721	-0.344955	0.998188
PFLU_0751	0.0210224	0.998188
PFLU_0398	-0.341836	0.742379
PFLU_4450	-0.0413009	0.998188
PFLU_4416	0.188979	0.998188
PFLU_4430	0.173926	0.998188
PFLU_5362	-0.356124	0.816683
PFLU_4411	0.142824	0.998188
PFLU_6043	0.0970404	0.998188
PFLU_3318	-0.360015	0.990668
PFLU_0745	-0.109632	0.998188
PFLU_4276	-0.231309	0.998188
PFLU_4456	0.273707	0.998188
PFLU_0752	0.0254887	0.998188
PFLU_3744	0.35423	0.998188
PFLU_0744	-0.248641	0.998188
PFLU_1358	-0.692547	0.998188
PFLU_3745	0.122998	0.998188
PFLU_0964	-0.0170669	0.998391
PFLU_2297	0.189027	0.998188
PFLU_5096	0.275711	0.990668
PFLU_4410	0.0573434	0.998188
PFLU_3741	0.14205	0.998188
PFLU_5499	0.214546	0.998188
PFLU_1687	-0.587146	0.998188
PFLU_1084	-0.0958941	0.998188
PFLU_2931	0.294754	0.998188
PFLU_4529	-0.218826	0.998188
PFLU_0594	-0.323011	0.998188
PFLU_1471	-0.267039	0.998188
PFLU_4441	0.0125321	0.998391
PFLU_1043	-1.24948	0.739959
PFLU_4401	0.202741	0.998188
PFLU_4948	0.0990798	0.998188
PFLU_0874	-0.839146	0.616112
PFLU_4463	-2.3577	0.000256096
PFLU_4250	0.446392	0.967166
PFLU_4415	0.0473211	0.998188
PFLU_0965	-0.113357	0.998188
PFLU_3743	0.200347	0.998188
PFLU_0083	-0.210314	0.998188
PFLU_4295	-0.187053	0.998188
PFLU_0990	0.512909	0.998188
PFLU_4408	0.150212	0.998188
PFLU_4969	-0.287653	0.992665
PFLU_3746	0.172883	0.998188
PFLU_1830	-0.405078	0.739959
PFLU_4257	0.237068	0.998188
PFLU_3290	-0.100613	0.998188
PFLU_5269	-0.19938	0.998188
PFLU_3042	-0.120639	0.998188
PFLU_1814	0.335955	0.998188
PFLU_5092	-0.147205	0.998188
PFLU_4936	0.040775	0.998188
PFLU_5112	0.41614	0.998188
PFLU_3279	0.0630419	0.998188
PFLU_1085	0.000789568	0.998705
PFLU_4409	0.0280794	0.998188
PFLU_0749	-0.153396	0.998188
PFLU_0746	-0.0578479	0.998188
PFLU_3752	0.095158	0.998188
PFLU_0910	0.201551	0.998188
PFLU_2918	-0.271567	0.998188
PFLU_1716	0.187501	0.998188
PFLU_0597	-0.0223258	0.998391
PFLU_3944	0.487448	0.728453
PFLU_0363	0.0840416	0.998188
PFLU_1616	-0.144402	0.998188
PFLU_4406	0.0399581	0.998188
PFLU_3942	0.378683	0.756354
PFLU_3943	0.433106	0.858838
PFLU_0748	-0.0957665	0.998188
PFLU_4435	0.307346	0.998188
PFLU_5174	-0.417887	0.990668
PFLU_0508	-0.0226414	0.998188
PFLU_5891	-0.086087	0.998188
PFLU_0064	0.112751	0.998188
PFLU_4377	-0.464002	0.998188
PFLU_4734	0.122025	0.998188
PFLU_4419	0.177604	0.998188
PFLU_3424	0.329232	0.998188
PFLU_3269	-0.0882521	0.998188
PFLU_4437	0.114278	0.998188
PFLU_4427	0.132592	0.998188
PFLU_4438	-0.0321718	0.998188
PFLU_0186	-0.0405385	0.998188
PFLU_0637	0.349019	0.703454
PFLU_3444	0.0898744	0.998188
PFLU_5090	-0.14131	0.998188
PFLU_0747	-0.0642954	0.998188
PFLU_5270	-0.25133	0.990668
PFLU_4436	-0.144267	0.998188
PFLU_3270	-0.0448665	0.998188
PFLU_2545	-0.196715	0.998188
PFLU_3354	0.00111128	0.998705
PFLU_3105	-0.0189817	0.998188
PFLU_5957	-0.0997135	0.998188
PFLU_0988	0.546541	0.990668
PFLU_4382	-0.554883	0.616112
PFLU_1150	0.234365	0.998188
PFLU_5093	0.23697	0.998188
PFLU_0063	0.215919	0.998188
PFLU_3516	0.510314	0.616112
PFLU_3668	-1.23638	0.867981
PFLU_4446	0.0663284	0.998188
PFLU_4418	0.0644495	0.998188
PFLU_4568	-0.857575	0.998188
PFLU_4766	0.236582	0.998188
PFLU_5176	-0.263934	0.998188
PFLU_3289	-0.0831799	0.998188
PFLU_4426	-0.0064112	0.998391
PFLU_1813	0.0742794	0.998188
PFLU_0059	0.0663786	0.998188
PFLU_5036	0.463923	0.998188
PFLU_4732	-0.150833	0.998188
PFLU_0750	-0.0712896	0.998188
PFLU_6022	0.303783	0.998188
PFLU_4609	0.48027	0.998188
PFLU_4988	-0.223865	0.998188
PFLU_0534	-0.0842966	0.998188
PFLU_0533	-0.0709986	0.998188
PFLU_0061	0.0358919	0.998188
PFLU_5454	0.0226235	0.998391
PFLU_0065	0.190102	0.998188
PFLU_3904	-0.00432213	0.998391
PFLU_1348	-0.0907785	0.998188
PFLU_0702	-0.619452	0.923402
PFLU_4272	0.556574	0.998188
PFLU_4420	0.222407	0.998188
PFLU_0984	0.270879	0.998188
PFLU_0380	-0.03176	0.998391
PFLU_0703	-0.363061	0.990972
PFLU_2318	0.527105	0.998188
PFLU_4439	-0.025973	0.998188
PFLU_3742	-0.287994	0.998188
PFLU_5625	0.0613684	0.998188
PFLU_3425	0.247542	0.998188
PFLU_3091	2.70049	8.87424e-05
PFLU_2916	0.62319	0.616112
PFLU_0698	-0.54628	0.998188
PFLU_2544	0.11791	0.998188
PFLU_2319	0.639219	0.741845
PFLU_2321	0.464916	0.93038
PFLU_5322	0.144334	0.998188
PFLU_1152	-0.113827	0.998188
PFLU_5483	-1.19491	0.998188
PFLU_4384	-0.461916	0.728453
PFLU_0066	0.0788081	0.998188
PFLU_1321	0.111221	0.998188
PFLU_5556	0.136056	0.998188
PFLU_0963	-0.140234	0.998188
PFLU_0645	0.192764	0.998188
PFLU_3940	0.500638	0.616112
PFLU_2039	0.0285614	0.998188
PFLU_2317	0.439854	0.923089
PFLU_0817	-0.0691256	0.998188
PFLU_5730	-0.0161426	0.998391
PFLU_0362	-0.15637	0.998188
PFLU_0979	0.497276	0.998188
PFLU_2035	0.390455	0.990972
PFLU_5860	-0.0852823	0.998188
PFLU_3278	-0.0543052	0.998188
PFLU_1132	0.0171111	0.998391
PFLU_0060	0.0705899	0.998188
PFLU_4440	0.0905678	0.998188
PFLU_4191	-0.248261	0.998188
PFLU_4277	-0.265786	0.871694
PFLU_5859	0.28448	0.998188
PFLU_1905	-0.187488	0.998188
PFLU_4424	-0.377303	0.998188
PFLU_2316	0.693346	0.606293
PFLU_5513	-0.108606	0.998188
PFLU_3766	-0.310127	0.998188
PFLU_2696	-0.0684242	0.998188
PFLU_5225	0.285607	0.954437
PFLU_0058	-0.0306158	0.998188
PFLU_5582	0.0502116	0.998188
PFLU_4423	-0.0879222	0.998188
PFLU_5761	0.00380509	0.998391
PFLU_5216	-0.0472307	0.998188
PFLU_2154	0.107123	0.998188
PFLU_0642	0.399329	0.825229
PFLU_3156	-0.308484	0.998188
PFLU_1757	0.150845	0.998188
PFLU_2919	-0.136641	0.998188
PFLU_4422	0.0194798	0.998391
PFLU_1131	-0.167455	0.998188
PFLU_0648	-0.0227228	0.998188
PFLU_2003	-0.0404875	0.998188
PFLU_3001	-0.0972067	0.998188
PFLU_1100	0.06122	0.998188
PFLU_3163	-0.32922	0.936689
PFLU_2264	0.104731	0.998188
PFLU_3941	0.46729	0.540169
PFLU_5479	-0.568825	0.616112
PFLU_6042	-0.0622164	0.998188
PFLU_0636	0.0315847	0.998188
PFLU_6076	-0.455264	0.992665
PFLU_4554	-1.58464	0.998188
PFLU_3090	2.62863	0.00019028
PFLU_1906	-0.307161	0.998188
PFLU_4987	-0.317925	0.990668
PFLU_5226	0.0645425	0.998188
PFLU_1363	0.0582377	0.998188
PFLU_1907	-0.366346	0.998188
PFLU_1908	-0.135879	0.998188
PFLU_0986	0.241267	0.998188
PFLU_5487	0.246904	0.998188
PFLU_0893	-0.104971	0.998188
PFLU_5639	-0.26438	0.998188
PFLU_2920	-0.29077	0.998188
PFLU_4388	-0.0833861	0.998188
PFLU_2802	0.150285	0.998188
PFLU_2038	-0.215762	0.998188
PFLU_0535	-0.0748172	0.998188
PFLU_4972	0.107881	0.998188
PFLU_0085	-0.304365	0.869376
PFLU_5170	-0.0405414	0.998188
PFLU_4708	-0.0705712	0.998188
PFLU_2320	0.46267	0.992665
PFLU_2792	0.108782	0.998188
PFLU_3630	0.0527673	0.998188
PFLU_2586	0.204378	0.998188
PFLU_2730	0.0651188	0.998188
PFLU_0644	0.0302805	0.998188
PFLU_1490	0.0632952	0.998188
PFLU_5386	-0.00167241	0.998705
PFLU_5334	0.0704974	0.998188
PFLU_1042	0.292501	0.998188
PFLU_0091	0.198853	0.998188
PFLU_0980	0.348369	0.998188
PFLU_4428	-0.038083	0.998188
PFLU_0875	-0.0170484	0.998391
PFLU_1547	0.0868286	0.998188
PFLU_2558	-0.1767	0.998188
PFLU_1486	-0.135756	0.998188
PFLU_0755	-0.101426	0.998188
PFLU_0787	-0.523879	0.998188
PFLU_0657	0.110306	0.998188
PFLU_5535	-0.127024	0.998188
PFLU_5536	-0.137333	0.998188
PFLU_1439	0.00912376	0.998391
PFLU_1151	0.214206	0.998188
PFLU_0973	-0.763995	0.998188
PFLU_5980	-0.0915946	0.998188
PFLU_5359	-0.164009	0.998188
PFLU_0118	-0.41967	0.998188
PFLU_2963	0.126151	0.998188
PFLU_0403	0.054549	0.998188
PFLU_2729	-0.0422641	0.998188
PFLU_4293	0.143418	0.998188
PFLU_4378	-0.308602	0.998188
PFLU_0876	0.12706	0.998188
PFLU_0639	0.198896	0.998188
PFLU_1026	-0.176441	0.998188
PFLU_0646	0.208956	0.998188
PFLU_3482	0.338272	0.922796
PFLU_5729	-0.139939	0.998188
PFLU_6136	-0.0170388	0.998391
PFLU_2075	-0.0446874	0.998188
PFLU_4374	0.049153	0.998188
PFLU_5583	-0.0738673	0.998188
PFLU_2078	0.0461904	0.998188
PFLU_3287	0.314419	0.998188
PFLU_5512	-0.0907635	0.998188
PFLU_4429	-0.0688225	0.998188
PFLU_4243	0.22833	0.998188
PFLU_2153	-0.175487	0.998188
PFLU_3989	0.080929	0.998188
PFLU_1205	0.000881822	0.998705
PFLU_3902	-0.222466	0.998188
PFLU_3736	-0.076707	0.998188
PFLU_0982	0.432354	0.998188
PFLU_3410	0.158235	0.998188
PFLU_0297	-0.345387	0.998188
PFLU_2080	0.0942811	0.998188
PFLU_3903	-0.0348249	0.998391
PFLU_2694	-0.0511849	0.998188
PFLU_1396	0.233542	0.998188
PFLU_2803	0.398987	0.86393
PFLU_3734	0.0823846	0.998188
PFLU_5169	-0.272444	0.990668
PFLU_3570	0.66751	0.990668
PFLU_0141	-0.0561056	0.998188
PFLU_3562	0.592281	0.616112
PFLU_2921	-0.166056	0.998188
PFLU_5509	0.0702169	0.998188
PFLU_2394	-0.0918108	0.998188
PFLU_3288	0.14251	0.998188
PFLU_4334	0.215835	0.998188
PFLU_0369	-0.0941306	0.998188
PFLU_0651	0.00158964	0.998705
PFLU_0839	-0.0597603	0.998188
PFLU_2471	0.0788309	0.998188
PFLU_0458	0.124239	0.998188
PFLU_1025	-0.0666376	0.998188
PFLU_4736	0.0540811	0.998188
PFLU_1136	-0.0844009	0.998188
PFLU_2077	0.561937	0.616112
PFLU_4883	0.101245	0.998188
PFLU_0370	0.178352	0.998188
PFLU_2470	0.232054	0.998188
PFLU_4425	-0.168285	0.998188
PFLU_5511	-0.0372747	0.998188
PFLU_0575	-0.328658	0.807914
PFLU_1604	-0.354956	0.998188
PFLU_0361	-0.0939811	0.998188
PFLU_0062	0.0984921	0.998188
PFLU_1649	-0.0457414	0.998188
PFLU_0765	0.00625203	0.998391
PFLU_5858	-0.0254161	0.998391
PFLU_2081	-0.214119	0.998188
PFLU_0641	-0.220475	0.998188
PFLU_2058	-0.3813	0.998188
PFLU_5115	0.642979	0.703454
PFLU_3280	-0.0301309	0.998188
PFLU_5567	0.189411	0.998188
PFLU_1364	0.116088	0.998188
PFLU_2616	0.102947	0.998188
PFLU_5584	0.0100434	0.998391
PFLU_3089	1.49475	0.000379467
PFLU_0367	0.135181	0.998188
PFLU_5324	-0.0315023	0.998188
PFLU_3220	-0.0624571	0.998188
PFLU_1250	-0.0869058	0.998188
PFLU_5979	-0.0117426	0.998391
PFLU_1756	0.285197	0.998188
PFLU_5532	-0.0355952	0.998188
PFLU_2040	0.269341	0.998188
PFLU_5215	-0.0665158	0.998188
PFLU_2074	0.0571568	0.998188
PFLU_3219	-0.203847	0.998188
PFLU_2036	0.0364128	0.998188
PFLU_2979	-0.0117969	0.998391
PFLU_3092	1.8587	8.87424e-05
PFLU_0089	0.203634	0.998188
PFLU_5141	-0.151546	0.998188
PFLU_2658	0.0479424	0.998188
PFLU_5171	-0.0762803	0.998188
PFLU_0351	-0.360488	0.998188
PFLU_3130	-0.24011	0.998188
PFLU_0987	0.554007	0.990668
PFLU_4305	1.25444	0.728453
PFLU_4810	0.228595	0.998188
PFLU_3362	-0.227525	0.923089
PFLU_5644	-0.181022	0.998188
PFLU_2757	0.0455018	0.998188
PFLU_2951	0.260067	0.998188
PFLU_4615	-0.167385	0.998188
PFLU_4958	-0.336004	0.990668
PFLU_4991	0.145223	0.998188
PFLU_2535	0.758893	0.990668
PFLU_2224	0.364793	0.998188
PFLU_0067	-0.0360197	0.998188
PFLU_2326	0.627241	0.953196
PFLU_0676	0.376211	0.990668
PFLU_5255	0.0184535	0.998391
PFLU_5525	-0.0261266	0.998188
PFLU_5510	-0.113704	0.998188
PFLU_5538	-0.172173	0.998188
PFLU_2726	-0.416722	0.816683
PFLU_5526	-0.087022	0.998188
PFLU_0818	0.0959942	0.998188
PFLU_0915	-0.16605	0.998188
PFLU_2323	0.684028	0.703454
PFLU_3906	-0.0696273	0.998188
PFLU_4400	-0.038567	0.998188
PFLU_4989	-0.133641	0.998188
PFLU_4644	0.12507	0.998188
PFLU_0994	0.0772253	0.998188
PFLU_4555	-0.911751	0.998188
PFLU_1578	-0.315257	0.739959
PFLU_0952	-0.0533172	0.998188
PFLU_2302	0.182996	0.998188
PFLU_0542	0.0381222	0.998188
PFLU_0649	-0.200632	0.998188
PFLU_5565	0.134966	0.998188
PFLU_1270	-0.0986004	0.998188
PFLU_1101	0.150951	0.998188
PFLU_4387	-0.100358	0.998188
PFLU_1575	-0.158568	0.998188
PFLU_2543	-0.0215746	0.998391
PFLU_3905	-0.0810951	0.998188
PFLU_0294	0.384665	0.990668
PFLU_4610	0.410925	0.998188
PFLU_5488	0.228574	0.998188
PFLU_5528	-0.0011876	0.998705
PFLU_3359	-0.0081723	0.998391
PFLU_2288	0.49887	0.849652
PFLU_1138	-0.0283893	0.998188
PFLU_5480	-0.471917	0.728453
PFLU_5481	-0.497514	0.616112
PFLU_5089	-0.135135	0.998188
PFLU_2561	-3.06493	0.495992
PFLU_3107	-0.121871	0.998188
PFLU_0924	0.118111	0.998188
PFLU_1423	0.0495629	0.998188
PFLU_5431	-0.23033	0.998188
PFLU_0675	0.425426	0.871694
PFLU_4714	-0.145619	0.998188
PFLU_5527	-0.0490981	0.998188
PFLU_0909	0.608896	0.93038
PFLU_1914	-0.126482	0.998188
PFLU_0365	-0.112833	0.998188
PFLU_2531	0.230541	0.998188
PFLU_6135	-0.0170046	0.998391
PFLU_5802	0.00201329	0.998705
PFLU_3487	0.0139711	0.998391
PFLU_2647	0.0380989	0.998188
PFLU_2529	0.166184	0.998188
PFLU_2066	0.0133166	0.998391
PFLU_3435	-0.53093	0.659228
PFLU_2076	-0.0465554	0.998188
PFLU_4292	0.12609	0.998188
PFLU_4151	-0.0201585	0.998391
PFLU_0638	0.124947	0.998188
PFLU_4614	-0.093944	0.998188
PFLU_1090	-0.00936696	0.998391
PFLU_5247	-0.154323	0.998188
PFLU_4443	-0.0810751	0.998188
PFLU_0327	-0.00944956	0.998391
PFLU_1137	-0.0457649	0.998188
PFLU_2055	-0.266598	0.998188
PFLU_5731	-0.138433	0.998188
PFLU_4819	0.137266	0.998188
PFLU_5010	-0.0958243	0.998188
PFLU_5033	-0.119014	0.998188
PFLU_1351	0.0955214	0.998188
PFLU_4053	-1.36614	0.102373
PFLU_5566	-0.122077	0.998188
PFLU_0760	-0.110114	0.998188
PFLU_1919	0.114909	0.998188
PFLU_5774	-0.175312	0.998188
PFLU_2888A	-0.0394884	0.998188
PFLU_1566	-0.141593	0.998188
PFLU_0754	0.284642	0.990668
PFLU_1213	0.0372689	0.998188
PFLU_4737	0.0136029	0.998391
PFLU_4383	-0.361245	0.86393
PFLU_3336	0.0492481	0.998188
PFLU_4918	0.0232224	0.998188
PFLU_0569	-0.301663	0.989476
PFLU_0923	0.315728	0.998188
PFLU_5789	0.711631	0.277735
PFLU_0981	0.282847	0.998188
PFLU_5156	0.386378	0.9669
PFLU_0650	-0.332827	0.998188
PFLU_1648	-0.110123	0.998188
PFLU_1502	0.0936767	0.998188
PFLU_4707	-0.290535	0.998188
PFLU_3619	0.22993	0.998188
PFLU_4081	-0.0254065	0.998391
PFLU_2079	-0.0255892	0.998188
PFLU_2324	0.609993	0.883908
PFLU_2573	0.284026	0.998188
PFLU_5728	-0.0968602	0.998188
PFLU_1249	0.0379557	0.998188
PFLU_5268	-0.138462	0.998188
PFLU_3816	0.206119	0.992665
PFLU_3881	0.28105	0.998188
PFLU_2605	0.065291	0.998188
PFLU_0840	-0.0196263	0.998391
PFLU_3733	-0.0302147	0.998188
PFLU_5140	-0.320757	0.998188
PFLU_2222	0.22939	0.998188
PFLU_0176	-0.183267	0.998188
PFLU_0598	-0.0457103	0.998188
PFLU_5013	-0.043463	0.998188
PFLU_2037	0.595245	0.739959
PFLU_5564	-0.0500421	0.998188
PFLU_0697	-0.571248	0.883908
PFLU_2930	0.326564	0.998188
PFLU_0352	0.364056	0.86393
PFLU_5075	-0.199934	0.998188
PFLU_3677	-0.18371	0.998188
PFLU_2127	-0.371721	0.962751
PFLU_3854	-0.311324	0.998188
PFLU_4212	0.292722	0.998188
PFLU_0621	-0.112864	0.998188
PFLU_5522	0.0363935	0.998188
PFLU_0366	0.118286	0.998188
PFLU_3787	0.127926	0.998188
PFLU_0167	-0.574506	0.703454
PFLU_0135	-0.272036	0.998188
PFLU_6041	0.0576544	0.998188
PFLU_2072	0.256761	0.998188
PFLU_0681	0.0551359	0.998188
PFLU_4709	-0.0376347	0.998188
PFLU_5519	0.0201227	0.998188
PFLU_1251	-0.0895835	0.998188
PFLU_5626	0.154411	0.998188
PFLU_5427	-0.0526742	0.998188
PFLU_0451	-0.193142	0.998188
PFLU_0565	-0.0317711	0.998188
PFLU_0699	-0.556345	0.990668
PFLU_1202	-0.13081	0.998188
PFLU_5047	-0.155593	0.998188
PFLU_1365	-0.00782387	0.998391
PFLU_0315	0.112115	0.998188
PFLU_6109	-0.228564	0.998188
PFLU_6023	-0.116895	0.998188
PFLU_0948	-0.313521	0.952194
PFLU_0985	0.314245	0.998188
PFLU_6006	0.103085	0.998188
PFLU_6025	0.0709522	0.998188
PFLU_0541	0.37094	0.933597
PFLU_2106	-1.28379	0.620136
PFLU_5220	-0.076291	0.998188
PFLU_2053	0.246484	0.998188
PFLU_3184	0.215547	0.998188
PFLU_0551	0.14671	0.998188
PFLU_0643	0.618404	0.616112
PFLU_0441	-0.162785	0.998188
PFLU_1252	0.0446549	0.998188
PFLU_5967	0.167465	0.998188
PFLU_5138	-0.255967	0.998188
PFLU_5829	-0.109179	0.998188
PFLU_4397	0.095506	0.998188
PFLU_2367	-0.355826	0.998188
PFLU_5508	-0.0318618	0.998188
PFLU_3674	-0.329643	0.998188
PFLU_0983	0.169033	0.998188
PFLU_0662	-0.0153105	0.998391
PFLU_5503	-0.0665391	0.998188
PFLU_4925	0.135449	0.998188
PFLU_5524	0.0205484	0.998391
PFLU_0543	0.0348594	0.998188
PFLU_4811	0.205242	0.998188
PFLU_2547	-0.290524	0.998188
PFLU_4117	0.410534	0.932738
PFLU_1877	-0.111953	0.998188
PFLU_5044	-0.111591	0.998188
PFLU_2327	0.539091	0.954437
PFLU_1522	0.135591	0.998188
PFLU_4366	0.406943	0.998188
PFLU_0690	0.348795	0.998188
PFLU_1576	-0.25361	0.990668
PFLU_0756	-0.141996	0.998188
PFLU_5489	0.331217	0.990668
PFLU_5518	-0.0842141	0.998188
PFLU_1349	-0.0446528	0.998188
PFLU_0554	0.0836456	0.998188
PFLU_0171	-0.0898537	0.998188
PFLU_6053	0.222239	0.998188
PFLU_5529	-0.034669	0.998188
PFLU_0572	-0.00401335	0.998391
PFLU_5523	0.0320329	0.998188
PFLU_5773	-0.249526	0.998188
PFLU_5076	0.032673	0.998188
PFLU_2710	0.00290479	0.998705
PFLU_3764	0.119404	0.998188
PFLU_1710	-0.0523536	0.998188
PFLU_2030	0.194757	0.998188
PFLU_4623	-0.307827	0.998188
PFLU_5249	-0.220982	0.998188
PFLU_1224	-0.083762	0.998188
PFLU_5537	-0.209515	0.990972
PFLU_3388	-0.260909	0.998188
PFLU_1027	-0.22516	0.998188
PFLU_0516	0.0358478	0.998188
PFLU_6021	-0.0870832	0.998188
PFLU_5531	-0.0501704	0.998188
PFLU_2163	-0.716839	0.620136
PFLU_3048	-0.379319	0.998188
PFLU_3271	-0.00918655	0.998391
PFLU_5530	-0.106425	0.998188
PFLU_1010	0.164314	0.998188
PFLU_2309	0.340867	0.998188
PFLU_5790	0.494326	0.441773
PFLU_0555	0.0199451	0.998391
PFLU_5012	-0.11768	0.998188
PFLU_4741	0.293205	0.998188
PFLU_4459	0.308782	0.998188
PFLU_6108	0.0848875	0.998188
PFLU_3662	-0.248405	0.998188
PFLU_4643	0.226085	0.998188
PFLU_5539	-0.157675	0.998188
PFLU_4035	0.338959	0.739959
PFLU_6014	0.527565	0.922796
PFLU_3583	0.805249	0.441773
PFLU_2601	-0.869139	0.926283
PFLU_6097	0.170173	0.998188
PFLU_0328	-0.0704158	0.998188
PFLU_0688	0.171519	0.998188
PFLU_5972	0.492543	0.990668
PFLU_1041	-0.735269	0.616112
PFLU_0753	0.164519	0.998188
PFLU_3498	-2.64459	0.480161
PFLU_3584	0.819248	0.51544
PFLU_3426	0.489216	0.990668
PFLU_2128	-0.314319	0.869376
PFLU_0826	-0.0890054	0.998188
PFLU_0090	0.298306	0.998188
PFLU_0187	-0.213959	0.998188
PFLU_1353	0.0992666	0.998188
PFLU_0764	-0.0678875	0.998188
PFLU_2126	-0.512251	0.998188
PFLU_0520	-0.157258	0.998188
PFLU_0308	-0.0196729	0.998391
PFLU_2218	-0.0870011	0.998188
PFLU_4396	0.0868265	0.998188
PFLU_2591	0.159057	0.998188
PFLU_5788	0.711461	0.296594
PFLU_5034	-0.258849	0.990668
PFLU_3635	-0.155148	0.998188
PFLU_4240	0.117596	0.998188
PFLU_2971	0.102318	0.998188
PFLU_4780	0.13809	0.998188
PFLU_5361	0.0400992	0.998188
PFLU_5521	0.0612894	0.998188
PFLU_1709	0.471544	0.616112
PFLU_3040	0.0620052	0.998188
PFLU_3108	-0.122188	0.998188
PFLU_3014	-0.140424	0.998188
PFLU_1995	0.448592	0.728453
PFLU_0684	-0.111152	0.998188
PFLU_1000	0.0864773	0.998188
PFLU_3631	-0.214891	0.998188
PFLU_5078	-0.175363	0.998188
PFLU_5014	0.0852074	0.998188
PFLU_5593	-0.0136522	0.998391
PFLU_3221	0.00174505	0.998705
PFLU_4190	-0.0222028	0.998188
PFLU_5504	-0.0491789	0.998188
PFLU_4717	-0.345422	0.998188
PFLU_3711	-0.117734	0.998188
PFLU_1255	0.242709	0.998188
PFLU_4267	0.647674	0.86393
PFLU_1070	-0.311428	0.989476
PFLU_4433	0.0365309	0.998188
PFLU_0940	-0.440291	0.998188
PFLU_5604	-1.28136	0.616112
PFLU_3982	0.446677	0.990972
PFLU_0647	0.146218	0.998188
PFLU_3582	1.06274	0.100037
PFLU_3188	-0.367854	0.998188
PFLU_5118	0.202775	0.998188
PFLU_0170	0.0949215	0.998188
PFLU_2151	0.227196	0.998188
PFLU_2325	0.529563	0.990668
PFLU_1432	0.35193	0.856365
PFLU_3599	0.0443357	0.998188
PFLU_3356	0.0561719	0.998188
PFLU_5333	0.0651518	0.998188
PFLU_6134	-0.115638	0.998188
PFLU_2368	-0.0518714	0.998188
PFLU_5173	-0.211091	0.998188
PFLU_4458	0.279015	0.998188
PFLU_5502	-0.0938605	0.998188
PFLU_5346	-0.0296285	0.998188
PFLU_5383	0.204038	0.998188
PFLU_3808	0.00589427	0.998391
PFLU_4198	-0.0884836	0.998188
PFLU_5568	0.186299	0.998188
PFLU_1685	0.78171	0.616112
PFLU_0146	-0.328851	0.998188
PFLU_0951	-0.17052	0.998188
PFLU_1512	-0.107563	0.998188
PFLU_0084	-0.21678	0.990668
PFLU_6020	-0.0554624	0.998188
PFLU_5252	-0.427847	0.616112
PFLU_2900	-0.239592	0.998188
PFLU_3833	0.310026	0.998188
PFLU_3275	0.0396961	0.998188
PFLU_3650	0.212514	0.998188
PFLU_1702	0.328839	0.998188
PFLU_5507	0.0215846	0.998188
PFLU_5486	0.22283	0.998188
PFLU_5505	-0.0368892	0.998188
PFLU_5432	-0.0273681	0.998188
PFLU_2648	-0.0130798	0.998391
PFLU_4319	0.142749	0.998188
PFLU_1717	0.0445205	0.998188
PFLU_3136	0.154154	0.998188
PFLU_2987	-0.0697011	0.998188
PFLU_2452	-0.171597	0.998188
PFLU_1225	-0.0750577	0.998188
PFLU_5254	-0.186291	0.998188
PFLU_4901	-0.148307	0.998188
PFLU_4116	0.33324	0.871469
PFLU_1368	0.186609	0.998188
PFLU_5335	-0.0371529	0.998188
PFLU_4205	0.322507	0.922796
PFLU_5548	-0.152099	0.998188
PFLU_0949	-0.160783	0.998188
PFLU_0255	-0.310084	0.998188
PFLU_5795	-0.141757	0.998188
PFLU_0943	-0.287244	0.962751
PFLU_5520	0.0147589	0.998391
PFLU_0405	-0.103863	0.998188
PFLU_3192	0.200165	0.998188
PFLU_5256	0.0885478	0.998188
PFLU_1789	0.173823	0.998188
PFLU_4933	-0.191385	0.998188
PFLU_2791	-0.222372	0.998188
PFLU_4460	-0.00781748	0.998391
PFLU_0392	0.189667	0.998188
PFLU_0945	-0.249313	0.992665
PFLU_3515	-0.164241	0.998188
PFLU_3291	0.0692538	0.998188
PFLU_3682	0.0424891	0.998188
PFLU_5501	-0.120626	0.998188
PFLU_0728	0.348384	0.989476
PFLU_5724	0.0204021	0.998188
PFLU_4746	0.263396	0.998188
PFLU_0683	-0.101109	0.998188
PFLU_4325	0.218579	0.998188
PFLU_4499	-0.111702	0.998188
PFLU_4076	0.26648	0.998188
PFLU_2706	-0.00381121	0.998391
PFLU_5516	-0.0435833	0.998188
PFLU_3272	0.0997321	0.998188
PFLU_1643	-0.16625	0.998188
PFLU_4320	0.304977	0.992665
PFLU_5540	-0.134294	0.998188
PFLU_3678	-0.175784	0.998188
PFLU_2045	-0.636026	0.962751
PFLU_5772	-0.187974	0.998188
PFLU_3306	0.263575	0.998188
PFLU_1140	0.0717417	0.998188
PFLU_2915	0.446341	0.480161
PFLU_0691	0.0435371	0.998188
PFLU_1302A	-0.183587	0.998188
PFLU_5139	-0.50764	0.990668
PFLU_2617	0.423802	0.739959
PFLU_1524	0.099119	0.998188
PFLU_1133	0.145505	0.998188
PFLU_0368	0.150643	0.998188
PFLU_4622	-0.101841	0.998188
PFLU_4249	0.104123	0.998188
PFLU_5968	0.146731	0.998188
PFLU_4207	0.0901269	0.998188
PFLU_5430	0.00663126	0.998391
PFLU_3568	-0.335938	0.857835
PFLU_2970	0.107781	0.998188
PFLU_4579	0.00697152	0.998391
PFLU_5590	-0.0447019	0.998188
PFLU_1163	-0.0962819	0.998188
PFLU_2307	0.433938	0.980251
PFLU_0519	-0.0612971	0.998188
PFLU_5544	-0.0546352	0.998188
PFLU_3970	0.334286	0.998188
PFLU_3901	0.0117357	0.998391
PFLU_4517	0.0119096	0.998391
PFLU_3049	0.109311	0.998188
PFLU_4461	-0.457041	0.703454
PFLU_0039	0.0049071	0.998391
PFLU_0011	-0.0433143	0.998188
PFLU_0553	0.173536	0.998188
PFLU_1139	-0.198286	0.998188
PFLU_2530	0.185102	0.998188
PFLU_1594	0.105957	0.998188
PFLU_3389	0.0722391	0.998188
PFLU_5726	-0.316532	0.728453
PFLU_1319	0.000541988	0.998705
PFLU_4701	-0.0363823	0.998188
PFLU_2071	0.238007	0.998188
PFLU_4995	-0.0440643	0.998188
PFLU_1903A	0.0469952	0.998188
PFLU_2382	-0.186962	0.998188
PFLU_1825	-0.359438	0.933597
PFLU_3390	0.158071	0.998188
PFLU_0903	-0.0902057	0.998188
PFLU_4432	0.0368344	0.998188
PFLU_3675	-0.610092	0.922796
PFLU_3874	0.0898836	0.998188
PFLU_2454	-0.253726	0.998188
PFLU_2953	-0.0193349	0.998391
PFLU_3443	0.12383	0.998188
PFLU_3204	0.183328	0.998188
PFLU_4321	0.265218	0.998188
PFLU_3380	0.295084	0.990668
PFLU_5344	-0.0449841	0.998188
PFLU_3405	0.199697	0.998188
PFLU_0731	-0.0828109	0.998188
PFLU_1787	0.152287	0.998188
PFLU_1433	0.247332	0.998188
PFLU_6085	-0.424708	0.86393
PFLU_0704	-0.321531	0.998188
PFLU_0614	-0.0906245	0.998188
PFLU_2152	0.16244	0.998188
PFLU_0926	0.095715	0.998188
PFLU_0603	0.210726	0.998188
PFLU_5506	0.0468314	0.998188
PFLU_1816	-0.201701	0.998188
PFLU_1050	0.173857	0.998188
PFLU_0475	-0.105427	0.998188
PFLU_0017	-0.114594	0.998188
PFLU_5330	-0.0893325	0.998188
PFLU_0956	0.0418114	0.998188
PFLU_2246	0.229772	0.998188
PFLU_1271	-0.172419	0.998188
PFLU_0319	0.174472	0.998188
PFLU_5345	-0.0612886	0.998188
PFLU_5725	-0.37646	0.728453
PFLU_2813	-0.234947	0.998188
PFLU_1086	0.214347	0.998188
PFLU_3529	-0.372502	0.998188
PFLU_2587	0.13161	0.998188
PFLU_5253	-0.156846	0.998188
PFLU_0040	0.0472104	0.998188
PFLU_2159	0.447382	0.616112
PFLU_5935	0.0512037	0.998188
PFLU_4097	0.569946	0.753112
PFLU_0659	0.0719622	0.998188
PFLU_5009	-0.165144	0.998188
PFLU_0942	-0.253299	0.998188
PFLU_2220	0.316293	0.923089
PFLU_0709	-0.0543252	0.998188
PFLU_5886	0.0487546	0.998188
PFLU_5613	-0.0345657	0.998188
PFLU_2133	-0.116152	0.998188
PFLU_5823	-0.144181	0.998188
PFLU_4054	-1.32084	0.192329
PFLU_4664	0.209988	0.998188
PFLU_4010	-0.00845173	0.998391
PFLU_3334	0.045852	0.998188
PFLU_3276	-0.0169688	0.998391
PFLU_2271	0.0719817	0.998188
PFLU_3616	0.444297	0.728453
PFLU_0147	0.573182	0.728453
PFLU_1788	-0.066602	0.998188
PFLU_4742	0.242991	0.998188
PFLU_3795	-0.300634	0.998188
PFLU_5514	0.298508	0.998188
PFLU_0076	-0.261027	0.998188
PFLU_0447	-0.489358	0.922796
PFLU_0364	0.153756	0.998188
PFLU_0342	0.33716	0.922796
PFLU_5500	0.25938	0.992706
PFLU_0201	0.0953554	0.998188
PFLU_4833	0.319953	0.998188
PFLU_3413	-1.17907	0.923089
PFLU_3719	-0.170468	0.998188
PFLU_1920	0.170797	0.998188
PFLU_5866	0.895037	0.441773
PFLU_2073	0.399635	0.86393
PFLU_5517	-0.0232577	0.998188
PFLU_5251	-0.0449339	0.998188
PFLU_4862	-0.013891	0.998391
PFLU_4668	-0.280349	0.998188
PFLU_1831	0.0765338	0.998188
PFLU_5571	-0.183328	0.998188
PFLU_1570	-0.0147117	0.998391
PFLU_0737	-0.0864376	0.998188
PFLU_1886	0.0793666	0.998188
PFLU_0612	-0.22673	0.998188
PFLU_0556	0.0639908	0.998188
PFLU_5596	-0.0241299	0.998188
PFLU_4738	-0.141887	0.998188
PFLU_4694	0.0398742	0.998188
PFLU_1040	-0.0536318	0.998188
PFLU_4099	0.332696	0.998188
PFLU_0611	-0.199078	0.998188
PFLU_5764	-0.225981	0.998188
PFLU_1682	0.00477801	0.998705
PFLU_1307	-0.0253574	0.998188
PFLU_1492	-0.0959085	0.998188
PFLU_3079	0.359122	0.962751
PFLU_6067	-0.00176725	0.998705
PFLU_5673	0.020438	0.998391
PFLU_4026	0.108032	0.998188
PFLU_6057	-0.522801	0.990668
PFLU_1853	-0.00840948	0.998391
PFLU_6027	0.908976	0.867981
PFLU_0946	-0.352063	0.93038
PFLU_5218	-0.0927528	0.998188
PFLU_5410	-0.155005	0.998188
PFLU_0788	-0.164492	0.998188
PFLU_2474	0.594399	0.922796
PFLU_5900	-0.0867778	0.998188
PFLU_1067	-0.208973	0.998188
PFLU_1491	-0.0943692	0.998188
PFLU_0950	-0.172951	0.998188
PFLU_3165	-0.260504	0.962751
PFLU_4559	-0.0570045	0.998188
PFLU_2788	-0.259851	0.998188
PFLU_2466	0.203005	0.998188
PFLU_4004	-0.065317	0.998188
PFLU_4905	0.1598	0.998188
PFLU_5134	-0.147009	0.998188
PFLU_5557	0.126499	0.998188
PFLU_6110	0.268682	0.990668
PFLU_3177	0.10152	0.998188
PFLU_0863	-0.0857871	0.998188
PFLU_5248	0.469344	0.904366
PFLU_0877	-0.108649	0.998188
PFLU_5017	-0.0685725	0.998188
PFLU_5801	-0.156271	0.998188
PFLU_5144	0.155325	0.998188
PFLU_0340	-0.228709	0.998188
PFLU_1278	-0.0696418	0.998188
PFLU_0625	-0.105443	0.998188
PFLU_1046	0.102028	0.998188
PFLU_1866	0.186105	0.998188
PFLU_1817	-0.157942	0.998188
PFLU_2028	-0.0785603	0.998188
PFLU_2180	0.0755381	0.998188
PFLU_4626	-0.275446	0.998188
PFLU_0895	-0.258499	0.867981
PFLU_5896	-0.0828864	0.998188
PFLU_2776	-0.349417	0.998188
PFLU_3199	-0.428509	0.998188
PFLU_4098	0.590638	0.616112
PFLU_2571	-0.226693	0.998188
PFLU_3446	-2.07772	0.616112
PFLU_0482	-0.0390291	0.998188
PFLU_2272	0.0208332	0.998188
PFLU_3462	0.00748237	0.998391
PFLU_3286	0.213719	0.998188
PFLU_3786	-0.0210003	0.998188
PFLU_5961	-0.155328	0.998188
PFLU_2922	-0.407391	0.739959
PFLU_5200	0.257144	0.998188
PFLU_3123	-0.283137	0.998188
PFLU_0592	0.0108555	0.998391
PFLU_4104	0.00882694	0.998391
PFLU_0682	-0.214304	0.998188
PFLU_4560	-0.113558	0.998188
PFLU_5765	-0.257309	0.998188
PFLU_5395	-0.156491	0.998188
PFLU_5628	-0.126914	0.998188
PFLU_5470	-0.0365081	0.998188
PFLU_6024	-0.0973649	0.998188
PFLU_1134	-0.339191	0.990668
PFLU_1003	0.227189	0.998188
PFLU_3813	-0.0233207	0.998188
PFLU_2651	-0.372823	0.998188
PFLU_3041	-0.0633026	0.998188
PFLU_5241	-0.0407187	0.998188
PFLU_2724	-0.0166425	0.998391
PFLU_4103	0.00135953	0.998705
PFLU_1436	0.0672531	0.998188
PFLU_1299	-0.156556	0.998188
PFLU_0267	-0.0743081	0.998188
PFLU_4395	0.133973	0.998188
PFLU_3129	-0.0256449	0.998391
PFLU_4170	-0.665531	0.769633
PFLU_0528	-0.111655	0.998188
PFLU_0742	0.347334	0.998188
PFLU_0010	-0.204566	0.998188
PFLU_5965	0.0558678	0.998188
PFLU_6018	0.131794	0.998188
PFLU_4326	0.126507	0.998188
PFLU_3981	0.68223	0.72482
PFLU_5845	0.168128	0.998188
PFLU_5292	-0.158824	0.998188
PFLU_2642	-0.0564249	0.998188
PFLU_5843	0.104493	0.998188
PFLU_3805	0.107263	0.998188
PFLU_0680	-0.126294	0.998188
PFLU_4399	0.0755381	0.998188
PFLU_5966	-0.13047	0.998188
PFLU_2057	-0.256336	0.998188
PFLU_2427	-0.295003	0.998188
PFLU_3747	0.00660227	0.998391
PFLU_5841	0.162573	0.998188
PFLU_0028	-0.0321476	0.998188
PFLU_4625	-0.0579404	0.998188
PFLU_4306	-0.0712468	0.998188
PFLU_0283	-0.0623389	0.998188
PFLU_6086	0.0467261	0.998188
PFLU_0142	0.00683464	0.998391
PFLU_1867	-0.109747	0.998188
PFLU_3567	-0.0525901	0.998188
PFLU_5822	0.199895	0.998188
PFLU_1002	0.192213	0.998188
PFLU_0563	0.55068	0.922796
PFLU_0894	-0.0846854	0.998188
PFLU_1305	-0.364281	0.998188
PFLU_4556	-0.814255	0.998188
PFLU_0914	0.0827138	0.998188
PFLU_1052	-0.173101	0.998188
PFLU_5595	-0.177649	0.998188
PFLU_6121	0.00136537	0.998705
PFLU_5545	-0.14166	0.998188
PFLU_5137	-0.435245	0.990668
PFLU_3073	0.252752	0.998188
PFLU_5713	-0.143188	0.998188
PFLU_3533	0.0109579	0.998391
PFLU_5534	-0.152412	0.998188
PFLU_6079	-0.108471	0.998188
PFLU_2674	-0.118556	0.998188
PFLU_1107	-0.114086	0.998188
PFLU_0338	-0.0341508	0.998188
PFLU_3195	-0.367043	0.998188
PFLU_0181	-0.109824	0.998188
PFLU_2725	0.0205316	0.998391
PFLU_4786	-0.147078	0.998188
PFLU_6015	0.285326	0.998188
PFLU_4294	-0.0394847	0.998188
PFLU_2160	0.405948	0.764341
PFLU_0939	-0.367178	0.990668
PFLU_0465	-0.284965	0.998188
PFLU_0029	-0.0170422	0.998391
PFLU_4595	0.127716	0.998188
PFLU_0905	-0.293269	0.871469
PFLU_2120	0.00570987	0.998391
PFLU_4891	-0.272883	0.998188
PFLU_2548	0.242678	0.998188
PFLU_0487	-0.0584085	0.998188
PFLU_1161	-0.103646	0.998188
PFLU_4038	0.0631109	0.998188
PFLU_5146	-0.0164583	0.998391
PFLU_5349	0.373687	0.990668
PFLU_5515	0.046174	0.998188
PFLU_2912	0.283262	0.998188
PFLU_3868	0.50955	0.967166
PFLU_0761	-0.137423	0.998188
PFLU_3200	-0.514792	0.990668
PFLU_3122	-0.0168501	0.998391
PFLU_3135	0.167413	0.998188
PFLU_5250	0.147404	0.998188
PFLU_5403	0.0740343	0.998188
PFLU_4885	-0.413112	0.990668
PFLU_4685	-0.028189	0.998188
PFLU_5026	-0.820886	0.441773
PFLU_0664	-0.436018	0.989476
PFLU_5777	0.0374522	0.998188
PFLU_4345	-0.117621	0.998188
PFLU_1664	0.0658875	0.998188
PFLU_1776	-0.0657432	0.998188
PFLU_4695	-0.0814882	0.998188
PFLU_1049	-0.099269	0.998188
PFLU_5007	-0.16117	0.998188
PFLU_4273	0.449086	0.998188
PFLU_0780	-0.164386	0.998188
PFLU_1714	-0.028438	0.998188
PFLU_1671	0.341494	0.989476
PFLU_6026	0.0457054	0.998188
PFLU_3748	-0.0192211	0.998188
PFLU_0225	-0.177207	0.998188
PFLU_5816	-0.28536	0.998188
PFLU_2555	0.125433	0.998188
PFLU_5607	0.102375	0.998188
PFLU_3173	-0.338141	0.998188
PFLU_1035	0.482917	0.76753
PFLU_4624	-0.0986328	0.998188
PFLU_2266	0.0604504	0.998188
PFLU_1450	0.128782	0.998188
PFLU_0767	-0.093814	0.998188
PFLU_5433	-0.116185	0.998188
PFLU_1653	0.506661	0.837147
PFLU_3759	-0.0304801	0.998188
PFLU_6039	-0.0318068	0.998188
PFLU_0938	-0.408899	0.998188
PFLU_5612	-0.0177489	0.998391
PFLU_5704	0.324318	0.989476
PFLU_4764	-0.466395	0.990668
PFLU_5872	-0.101034	0.998188
PFLU_2473	0.754863	0.628704
PFLU_1998	0.264241	0.962751
PFLU_5011	-0.170248	0.998188
PFLU_3153	0.135682	0.998188
PFLU_4507	-0.0225472	0.998188
PFLU_5099	-0.527241	0.990972
PFLU_1206	0.383932	0.998188
PFLU_5952	0.51858	0.728453
PFLU_1069	0.407754	0.825229
PFLU_2290	0.265771	0.86393
PFLU_3798	0.104906	0.998188
PFLU_0144	0.283103	0.962751
PFLU_1220	-0.420113	0.990972
PFLU_4795	-0.200035	0.998188
PFLU_4096	0.295573	0.998188
PFLU_0899	-0.0560014	0.998188
PFLU_4645	0.177572	0.998188
PFLU_1654	-0.23165	0.998188
PFLU_1558	-0.0100216	0.998391
PFLU_6007	0.263208	0.990668
PFLU_4362	0.317793	0.86393
PFLU_3224	-0.0358189	0.998188
PFLU_2364	0.622758	0.86393
PFLU_0103	-0.176292	0.998188
PFLU_1493	-0.1032	0.998188
PFLU_4593	0.402287	0.581376
PFLU_1715	0.228231	0.998188
PFLU_2843	-0.372453	0.998188
PFLU_4806	-0.0862802	0.998188
PFLU_4329	0.125775	0.998188
PFLU_4627	-0.14426	0.998188
PFLU_2223	0.0145658	0.998391
PFLU_3623	-0.0922396	0.998188
PFLU_1126	-0.091539	0.998188
PFLU_0143	0.0525866	0.998188
PFLU_6082	-0.0260932	0.998188
PFLU_1818	-0.281671	0.990668
PFLU_1215	-0.339122	0.998188
PFLU_3198	-0.224072	0.998188
PFLU_1055	-0.159267	0.998188
PFLU_4558	-0.0957908	0.998188
PFLU_6019	-0.14468	0.998188
PFLU_2981	0.427911	0.616112
PFLU_5411	-0.0680602	0.998188
PFLU_5994	-0.124757	0.998188
PFLU_1369	0.220887	0.990668
PFLU_2777	-0.158482	0.998188
PFLU_5003	0.307446	0.998188
PFLU_0343	0.539516	0.616112
PFLU_3561	0.398981	0.998188
PFLU_2677	0.0248773	0.998188
PFLU_2303	0.00511755	0.998391
PFLU_3952	-0.273722	0.998188
PFLU_0145	0.262335	0.992665
PFLU_1999	0.26754	0.922796
PFLU_0031	-0.361105	0.86393
PFLU_0838	-0.125927	0.998188
PFLU_2322	0.0232365	0.998296
PFLU_5267	-0.058441	0.998188
PFLU_1864	-0.10221	0.998188
PFLU_1747	-0.042144	0.998188
PFLU_4009	0.101536	0.998188
PFLU_4861	0.027569	0.998188
PFLU_1114	-0.0668464	0.998188
PFLU_5276	0.0420072	0.998188
PFLU_1704	-0.0603068	0.998188
PFLU_3695	1.30818	0.441773
PFLU_1413	0.124694	0.998188
PFLU_3320	0.172812	0.998188
PFLU_3391	0.0416356	0.998188
PFLU_2385	0.613506	0.967166
PFLU_0253	-0.310403	0.998188
PFLU_1216	-0.207543	0.998188
PFLU_0481	-0.132578	0.998188
PFLU_3363	-0.227682	0.91064
PFLU_3551	0.267972	0.990668
PFLU_4592	0.43888	0.441773
PFLU_2244	0.365015	0.989476
PFLU_3753	-0.16105	0.998188
PFLU_4634	0.241197	0.998188
PFLU_5273	-0.0202582	0.998188
PFLU_5371	0.110929	0.998188
PFLU_2123	-0.058849	0.998188
PFLU_1092	0.062735	0.998188
PFLU_1854	-0.329372	0.998188
PFLU_3987	-0.109317	0.998188
PFLU_5732	-0.00821595	0.998391
PFLU_6008	0.385429	0.820297
PFLU_5844	0.164826	0.998188
PFLU_5995	-0.111255	0.998188
PFLU_4665	0.381258	0.837147
PFLU_5766	0.0400484	0.998188
PFLU_3086	-0.109177	0.998188
PFLU_4796	-0.193134	0.998188
PFLU_0277	0.055061	0.998188
PFLU_0825	-0.0903456	0.998188
PFLU_4666	0.405496	0.86393
PFLU_2108	0.0176896	0.998188
PFLU_3585	1.01846	0.0332892
PFLU_0538	-0.0974548	0.998188
PFLU_3620	-0.220552	0.998188
PFLU_4561	-0.0581807	0.998188
PFLU_4316	0.0968271	0.998188
PFLU_4794	-0.170187	0.998188
PFLU_3174	-0.336456	0.998188
PFLU_0862	0.0871556	0.998188
PFLU_4748	-0.140844	0.998188
PFLU_3431	0.39194	0.998188
PFLU_0867	-0.0575515	0.998188
PFLU_4261	0.11457	0.998188
PFLU_1477	-0.114362	0.998188
PFLU_0180	-0.00138795	0.998705
PFLU_2618	0.302131	0.998188
PFLU_3315	-0.408373	0.998188
PFLU_5996	-0.142865	0.998188
PFLU_5209	-0.133938	0.998188
PFLU_1146	0.122078	0.998188
PFLU_2359	-0.0871458	0.998188
PFLU_3225	-0.0168839	0.998391
PFLU_5533	-0.0652428	0.998188
PFLU_5857	-0.313057	0.998188
PFLU_4594	0.38009	0.616112
PFLU_4475	0.199928	0.998188
PFLU_1434	0.605546	0.990972
PFLU_5149	0.22792	0.998188
PFLU_2607	0.0173522	0.998391
PFLU_5917	-0.150347	0.998188
PFLU_5119	-0.11268	0.998188
PFLU_3024	0.280965	0.990668
PFLU_0329	0.186015	0.998188
PFLU_2562	-1.7049	0.616112
PFLU_1683	0.0418378	0.998188
PFLU_6060	0.0515449	0.998188
PFLU_1209	0.0985801	0.998188
PFLU_5211	-0.156899	0.998188
PFLU_3693	0.48001	0.728453
PFLU_1571	-0.0276721	0.998188
PFLU_0913	0.0989474	0.998188
PFLU_3975	0.0415124	0.998188
PFLU_1935	0.665131	0.998188
PFLU_3676	-0.220182	0.998188
PFLU_2745	0.0538405	0.998188
PFLU_1370	0.178769	0.998188
PFLU_2301	-0.000808075	0.998705
PFLU_2332	0.812026	0.522933
PFLU_2221	0.351841	0.990668
PFLU_1292	0.203706	0.998188
PFLU_0166	0.20843	0.998188
PFLU_4270	0.249685	0.998188
PFLU_0568	0.239266	0.998188
PFLU_0020	0.119988	0.998188
PFLU_0947	-0.131992	0.998188
PFLU_1996	0.19325	0.998188
PFLU_0075	-0.165286	0.998188
PFLU_6017	0.0413861	0.998188
PFLU_3097	1.05178	0.00707932
PFLU_4266	0.603784	0.990972
PFLU_4825	0.231728	0.990668
PFLU_4275	0.726749	0.616112
PFLU_1596	0.0539949	0.998188
PFLU_1226	-0.17492	0.998188
PFLU_3684	-0.0746703	0.998188
PFLU_0476	-0.19248	0.998188
PFLU_2996	0.109244	0.998188
PFLU_1260	-0.0630338	0.998188
PFLU_2162	-0.114768	0.998188
PFLU_1261	-0.116776	0.998188
PFLU_1476	-0.00793156	0.998391
PFLU_4256	0.130436	0.998188
PFLU_2572	-0.0805085	0.998188
PFLU_0768	-0.228527	0.992665
PFLU_0770	0.0602861	0.998188
PFLU_6016	0.603809	0.86393
PFLU_5555	0.207442	0.998188
PFLU_1045	-0.13904	0.998188
PFLU_5474	-0.156746	0.998188
PFLU_3740	-0.114719	0.998188
PFLU_4268	0.515449	0.998188
PFLU_5469	0.0194686	0.998391
PFLU_4860	7.34594e-05	0.999731
PFLU_1102	-0.0696446	0.998188
PFLU_4588	-0.0494715	0.998188
PFLU_0712	-0.0754279	0.998188
PFLU_4313	0.0249223	0.998188
PFLU_0105	-0.265439	0.998188
PFLU_5024	-0.736036	0.597885
PFLU_0757	-0.464276	0.989476
PFLU_3513	0.00184806	0.998705
PFLU_6075	-0.090916	0.998188
PFLU_5771	0.111362	0.998188
PFLU_1254	-0.014565	0.998391
PFLU_0139	0.226413	0.990972
PFLU_3194	-0.369218	0.998188
PFLU_1807	-0.157789	0.998188
PFLU_5043	-0.108629	0.998188
PFLU_5372	-0.00637754	0.998391
PFLU_3087	-0.137285	0.998188
PFLU_0561	0.60422	0.867981
PFLU_3925	-0.0453633	0.998188
PFLU_3096	0.908194	0.0126171
PFLU_1592	0.300867	0.998188
PFLU_5846	0.0825149	0.998188
PFLU_3749	-0.399383	0.932738
PFLU_5831	0.225857	0.998188
PFLU_1105	0.407989	0.703454
PFLU_5309	0.0573655	0.998188
PFLU_4830	0.0736782	0.998188
PFLU_2962	-0.73	0.962751
PFLU_4578	-0.0504595	0.998188
PFLU_5219	-0.110651	0.998188
PFLU_0932	-0.105869	0.998188
PFLU_3707	0.279799	0.998188
PFLU_5780	-0.144286	0.998188
PFLU_0034	-0.183899	0.998188
PFLU_5421	0.0454578	0.998188
PFLU_1614	0.558787	0.728453
PFLU_4309	-0.377926	0.998188
PFLU_3852	-0.0700928	0.998188
PFLU_4674	-0.0240935	0.998391
PFLU_0113	-0.0432284	0.998188
PFLU_4522	0.160981	0.998188
PFLU_5684	0.107042	0.998188
PFLU_3036	0.0879778	0.998188
PFLU_2267	0.155866	0.998188
PFLU_1478	-0.146221	0.998188
PFLU_1565	-0.110254	0.998188
PFLU_0927	0.0137101	0.998391
PFLU_1223	-0.0792099	0.998188
PFLU_5482	-0.502341	0.739959
PFLU_2635	0.21022	0.998188
PFLU_3767	0.184735	0.998188
PFLU_2027	-0.0210154	0.998188
PFLU_1601	0.0576016	0.998188
PFLU_5736	0.386291	0.990668
PFLU_0227	-0.26805	0.998188
PFLU_3958	-0.0491561	0.998188
PFLU_5678	0.384542	0.86393
PFLU_4036	0.303185	0.998188
PFLU_2599	0.0830235	0.998188
PFLU_5062	-0.135557	0.998188
PFLU_4898	0.133232	0.998188
PFLU_6120	-0.175604	0.998188
PFLU_3098	0.588543	0.523186
PFLU_5735	0.502681	0.744095
PFLU_3412	0.0955053	0.998188
PFLU_2980	0.264006	0.998188
PFLU_0488	0.0811067	0.998188
PFLU_0485	-0.0751256	0.998188
PFLU_3690	-0.127559	0.998188
PFLU_2793	0.0904627	0.998188
PFLU_1246	-0.0464102	0.998188
PFLU_4772	-0.144662	0.998188
PFLU_0800	0.347443	0.86393
PFLU_0928	-0.183582	0.998188
PFLU_2964	-0.631731	0.990668
PFLU_0976	0.138385	0.998188
PFLU_1211	-0.0456373	0.998188
PFLU_4188	-0.11851	0.998188
PFLU_5842	0.212982	0.998188
PFLU_5938	0.00683293	0.998391
PFLU_4855	0.073069	0.998188
PFLU_2486	-0.0387651	0.998188
PFLU_1291	-0.131926	0.998188
PFLU_3317	-0.385567	0.990668
PFLU_1308	-0.054024	0.998188
PFLU_2150	0.0397962	0.998188
PFLU_3491	0.206615	0.998188
PFLU_1374	0.0139144	0.998391
PFLU_3374	0.0199352	0.998391
PFLU_2984	0.094972	0.998188
PFLU_3965	0.154855	0.998188
PFLU_3721	0.28539	0.998188
PFLU_0339	-0.17338	0.998188
PFLU_0266	-0.0474274	0.998188
PFLU_2991A	-0.125385	0.998188
PFLU_1309	0.169232	0.998188
PFLU_3977	-0.216705	0.998188
PFLU_3661	-0.450314	0.990668
PFLU_0112	-0.083537	0.998188
PFLU_5332	-0.0347703	0.998188
PFLU_0455	0.158135	0.998188
PFLU_0593	0.232797	0.998188
PFLU_4324	-0.0283649	0.998391
PFLU_4926	0.0772529	0.998188
PFLU_2564	0.00280115	0.998705
PFLU_5973	0.0080584	0.998391
PFLU_6055	-0.183716	0.998188
PFLU_1806	-0.230805	0.998188
PFLU_3216	0.258327	0.998188
PFLU_2956	0.160437	0.998188
PFLU_0311	-0.28112	0.990668
PFLU_3653	-0.0376284	0.998188
PFLU_2070	-0.030628	0.998188
PFLU_2425	0.228284	0.998188
PFLU_3617	0.605731	0.728453
PFLU_2433	0.247547	0.998188
PFLU_0941	-0.240495	0.998188
PFLU_0815	-0.0417801	0.998188
PFLU_4564	-0.0125573	0.998391
PFLU_1976	-0.0268558	0.998391
PFLU_1389	0.101212	0.998188
PFLU_3488	-0.0771365	0.998188
PFLU_1793	0.1469	0.998188
PFLU_0307	0.0996971	0.998188
PFLU_0071	0.162887	0.998188
PFLU_4476	-0.216442	0.998188
PFLU_2850	0.0572366	0.998188
PFLU_3574	-0.0431885	0.998188
PFLU_4064	-0.0129488	0.998391
PFLU_0400	-0.0724215	0.998188
PFLU_0831	-0.19039	0.998188
PFLU_0016	0.135423	0.998188
PFLU_3226	0.115322	0.998188
PFLU_1419	-0.283827	0.998188
PFLU_0934	0.0676329	0.998188
PFLU_3197	-0.177485	0.998188
PFLU_5217	0.015842	0.998391
PFLU_0158	-0.10679	0.998188
PFLU_3894	-0.155167	0.998188
PFLU_3501	0.0584756	0.998188
PFLU_4211	-0.79747	0.0358743
PFLU_3930	-0.14508	0.998188
PFLU_3951	-0.381805	0.962751
PFLU_1759	-0.0630525	0.998188
PFLU_1001	0.149788	0.998188
PFLU_3141	0.17947	0.998188
PFLU_1666	0.0876875	0.998188
PFLU_3085	-0.0483239	0.998188
PFLU_5350	0.27466	0.998188
PFLU_4603	-0.0243766	0.998188
PFLU_3476	0.105218	0.998188
PFLU_3658	-0.270984	0.998188
PFLU_3353	-0.00829621	0.998391
PFLU_4769	-0.117959	0.998188
PFLU_5352	0.173997	0.998188
PFLU_3277	0.183617	0.998188
PFLU_4947	-0.129277	0.998188
PFLU_1539	0.312708	0.990668
PFLU_1758	0.132118	0.998188
PFLU_0591	-0.359021	0.998188
PFLU_4749	-0.0942771	0.998188
PFLU_0873	-0.386212	0.998188
PFLU_0531	-0.0768541	0.998188
PFLU_0776	-0.152915	0.998188
PFLU_1253	-0.0634892	0.998188
PFLU_0295	0.141436	0.998188
PFLU_2043	-0.635864	0.990668
PFLU_0954	-0.244692	0.998188
PFLU_2723	-0.429591	0.703454
PFLU_4500	-0.05673	0.998188
PFLU_4863	0.117029	0.998188
PFLU_3613	0.153492	0.998188
PFLU_4519	0.219565	0.998188
PFLU_3305	0.356022	0.990972
PFLU_1519	-0.0214248	0.998188
PFLU_5796	-0.0922667	0.998188
PFLU_3615	0.318315	0.998188
PFLU_2550	-0.0206631	0.998391
PFLU_5027	-0.725236	0.51544
PFLU_3393	-0.00540698	0.998391
PFLU_3793	-0.224145	0.998188
PFLU_5257	0.164856	0.998188
PFLU_0590	0.190341	0.998188
PFLU_3510	0.10436	0.998188
PFLU_5611	-0.0416196	0.998188
PFLU_0093	-0.00831714	0.998391
PFLU_3335	0.0759308	0.998188
PFLU_5847	0.251287	0.998188
PFLU_4135	0.625838	0.992665
PFLU_2443	0.488955	0.789759
PFLU_4380	-0.32731	0.857835
PFLU_3614	0.255843	0.998188
PFLU_5229	-0.0976472	0.998188
PFLU_0148A	0.0909658	0.998188
PFLU_2086	-0.0327844	0.998188
PFLU_1878	-0.237678	0.998188
PFLU_1665	0.246432	0.998188
PFLU_1066	-0.128603	0.998188
PFLU_0191	0.206419	0.998188
PFLU_2371	-0.0605447	0.998188
PFLU_1767	0.0229177	0.998188
PFLU_6122	-0.0612763	0.998188
PFLU_3633	0.0672527	0.998188
PFLU_0837	0.0613437	0.998188
PFLU_0467	-0.0188111	0.998391
PFLU_3301	-0.0465743	0.998188
PFLU_3134	0.0958532	0.998188
PFLU_3316	-0.164842	0.998188
PFLU_0944	-0.184995	0.998188
PFLU_1896	0.407237	0.962751
PFLU_4682	-0.13735	0.998188
PFLU_5162	0.00732895	0.998391
PFLU_2082	-0.256472	0.998188
PFLU_2219	0.0260775	0.998188
PFLU_1823	-0.027979	0.998188
PFLU_3160	0.404042	0.728453
PFLU_2804	-0.0886137	0.998188
PFLU_1265	-0.143622	0.998188
PFLU_2304	0.0264822	0.998188
PFLU_4523	0.0167762	0.998391
PFLU_1015	0.509632	0.998188
PFLU_2331	1.14505	0.102373
PFLU_2546	-0.228523	0.994724
PFLU_4649	0.51358	0.998188
PFLU_0850	-0.138352	0.998188
PFLU_0713	-0.189315	0.998188
PFLU_0325	-0.0615652	0.998188
PFLU_4322	0.21612	0.998188
PFLU_3414	-0.170969	0.998188
PFLU_0562	0.711504	0.540169
PFLU_3445	-0.295492	0.998188
PFLU_3640	0.0989653	0.998188
PFLU_4745	-0.180773	0.989476
PFLU_6095	-0.133821	0.998188
PFLU_5637	-0.127831	0.998188
PFLU_5472	-0.148836	0.998188
PFLU_1234	0.323739	0.998188
PFLU_4264	0.168827	0.998188
PFLU_4787	0.0483201	0.998188
PFLU_2031	-0.0526607	0.998188
PFLU_2360	0.207387	0.998188
PFLU_2178	-0.456606	0.998188
PFLU_5323	0.255875	0.998188
PFLU_1448	0.454588	0.990668
PFLU_1667	-0.0888453	0.998188
PFLU_1727	0.132952	0.998188
PFLU_3964	0.234961	0.998188
PFLU_5073	0.0822858	0.998188
PFLU_1694	-0.342801	0.998188
PFLU_1827	0.014239	0.998391
PFLU_5377	-0.0458121	0.998188
PFLU_2135	-0.0675968	0.998188
PFLU_2270	-0.142971	0.998188
PFLU_4163	-0.201572	0.998188
PFLU_4181	-0.160459	0.998188
PFLU_3535	-0.106478	0.998188
PFLU_4890	-0.226545	0.998188
PFLU_5984	0.200053	0.998188
PFLU_4884	-0.0155158	0.998391
PFLU_1726	-0.186143	0.998188
PFLU_2621	0.149441	0.998188
PFLU_1111	-0.188947	0.998188
PFLU_3709	0.181688	0.998188
PFLU_3223	-0.117104	0.998188
PFLU_2676	-0.224508	0.971241
PFLU_4389	-0.384922	0.998188
PFLU_5645	0.103156	0.998188
PFLU_0521	-0.0852028	0.998188
PFLU_2654	-0.256092	0.998188
PFLU_3588	0.50492	0.846794
PFLU_2021	-0.12159	0.998188
PFLU_5579	-0.0872871	0.998188
PFLU_2824	0.101683	0.998188
PFLU_1148	0.0472856	0.998188
PFLU_2242	0.28884	0.867981
PFLU_0495	0.201577	0.998188
PFLU_0931	0.0533401	0.998188
PFLU_4718	-0.0238838	0.998188
PFLU_1720	0.143996	0.998188
PFLU_4274	0.728941	0.820297
PFLU_1018	0.0904057	0.998188
PFLU_4297	0.0048312	0.998391
PFLU_0109	-0.361686	0.998188
PFLU_4128D	0.0789288	0.998188
PFLU_3545	0.50937	0.998188
PFLU_0733	0.0582231	0.998188
PFLU_3196	-0.301993	0.998188
PFLU_3806	0.0981003	0.998188
PFLU_0779	-0.109788	0.998188
PFLU_0223	0.0761601	0.998188
PFLU_1881	-0.0102977	0.998391
PFLU_3050	-0.678181	0.631674
PFLU_5147	0.623714	0.990668
PFLU_4128C	-0.139401	0.998188
PFLU_2733	-0.260545	0.976934
PFLU_2994	0.0897069	0.998188
PFLU_5434	0.0633196	0.998188
PFLU_3222	-0.151384	0.998188
PFLU_3896	-0.0198089	0.998188
PFLU_2731	-0.00677182	0.998391
PFLU_3109	-0.160811	0.998188
PFLU_3775	0.301523	0.989476
PFLU_2421	-0.149639	0.998188
PFLU_0022	-0.038353	0.998188
PFLU_1672	0.0378807	0.998188
PFLU_1868	0.0626696	0.998188
PFLU_1332	-0.113211	0.998188
PFLU_5314	0.0753721	0.998188
PFLU_2698	0.265146	0.998188
PFLU_0898	0.0596816	0.998188
PFLU_3387	-0.452979	0.998188
PFLU_1505	0.227753	0.998188
PFLU_0240	-0.0123168	0.998391
PFLU_3926	0.0528357	0.998188
PFLU_5458	-0.269379	0.998188
PFLU_2568	-0.107095	0.998188
PFLU_1640	0.0974113	0.998188
PFLU_5415	0.14521	0.998188
PFLU_2846	0.0991188	0.998188
PFLU_3946	-0.160249	0.998188
PFLU_2620	0.291854	0.998188
PFLU_2596	-0.295987	0.998188
PFLU_6104	-0.0687696	0.998188
PFLU_3855	0.069949	0.998188
PFLU_4122A	0.0856043	0.998188
PFLU_2333	1.08196	0.296594
PFLU_0830	0.220442	0.998188
PFLU_1582	0.25103	0.923089
PFLU_2164	-0.307092	0.998188
PFLU_3478	0.111231	0.998188
PFLU_3873	0.100596	0.998188
PFLU_6013	0.027099	0.998188
PFLU_3236	0.0514113	0.998188
PFLU_5964	-0.0516972	0.998188
PFLU_4791	0.0657351	0.998188
PFLU_2737	-0.157807	0.998188
PFLU_3265	0.179876	0.998188
PFLU_0203	-0.330334	0.998188
PFLU_0727	0.244431	0.998188
PFLU_0527	0.0720156	0.998188
PFLU_1311	0.331552	0.925986
PFLU_0211	0.0819522	0.998188
PFLU_1156	-0.0687331	0.998188
PFLU_3632	0.0458967	0.998188
PFLU_0479	0.203573	0.998188
PFLU_0140	0.0115288	0.998391
PFLU_0003	-0.208953	0.998188
PFLU_5117	-0.363818	0.998188
PFLU_2766	-0.133744	0.998188
PFLU_0634	0.0664957	0.998188
PFLU_2721	-0.285708	0.998188
PFLU_3392	0.066304	0.998188
PFLU_6119	-0.237953	0.86393
PFLU_5355	0.0269662	0.998188
PFLU_3235	0.380134	0.992665
PFLU_4193	-0.191799	0.992665
PFLU_5710	0.332665	0.998188
PFLU_0394	0.111971	0.998188
PFLU_4959	-0.0564153	0.998188
PFLU_6072	-0.132468	0.998188
PFLU_4553	-0.705715	0.998188
PFLU_2155	0.0964259	0.998188
PFLU_4074	0.375085	0.998188
PFLU_4391	-0.101991	0.998188
PFLU_5463	-0.160983	0.998188
PFLU_5136	0.0124744	0.998391
PFLU_5025	-0.53323	0.922796
PFLU_5712	-0.208448	0.990668
PFLU_2449	-0.0574462	0.998188
PFLU_1467	0.119104	0.998188
PFLU_4068	0.151886	0.998188
PFLU_1608	0.22073	0.998188
PFLU_2386	0.0851309	0.998188
PFLU_4808	-0.0353862	0.998188
PFLU_4897	-0.0680923	0.998188
PFLU_1135	-0.272412	0.990668
PFLU_1214	-0.0482146	0.998188
PFLU_1699	-0.18854	0.998188
PFLU_4896	0.0123429	0.998391
PFLU_0663	-0.272915	0.998188
PFLU_0213	-0.00609073	0.998391
PFLU_5015	-0.118552	0.998188
PFLU_5328	-0.149772	0.998188
PFLU_1494	-0.159421	0.998188
PFLU_4683	-0.181624	0.998188
PFLU_6066	0.00347036	0.998705
PFLU_1300	-0.0305055	0.998188
PFLU_2047	0.419984	0.998188
PFLU_5889	-0.064873	0.998188
PFLU_2675	-0.185989	0.998188
PFLU_5603	-0.0448047	0.998188
PFLU_5338	-0.204181	0.998188
PFLU_6130	-0.12618	0.998188
PFLU_3155	0.100772	0.998188
PFLU_1612	-1.01303	0.73497
PFLU_3673	0.0936623	0.998188
PFLU_3500	0.0262974	0.998391
PFLU_0251	-0.106076	0.998188
PFLU_2330	1.14316	0.479934
PFLU_5189	0.179253	0.998188
PFLU_4222	0.26619	0.998188
PFLU_2156	0.265988	0.998188
PFLU_1606	0.135122	0.998188
PFLU_4539	-0.073416	0.998188
PFLU_3383	-0.0109897	0.998391
PFLU_4859	-0.2014	0.998188
PFLU_0265	0.0991572	0.998188
PFLU_2870	0.427209	0.86393
PFLU_1012	-0.741896	0.998188
PFLU_5306	0.19755	0.998188
PFLU_2615	-0.308146	0.998188
PFLU_4809	-0.0057451	0.998391
PFLU_5072	-0.00512431	0.998391
PFLU_5168	-0.134822	0.998188
PFLU_1520	0.0357033	0.998188
PFLU_1940	0.284354	0.998188
PFLU_4712	0.0163204	0.998391
PFLU_5546	-0.149833	0.998188
PFLU_4114	0.44871	0.744095
PFLU_2509A	-0.129065	0.998188
PFLU_2256	-0.0527717	0.998188
PFLU_4611	0.270522	0.998188
PFLU_4902	-0.0804685	0.998188
PFLU_0041	-0.0939684	0.998188
PFLU_2029	0.0871645	0.998188
PFLU_2281	0.143432	0.998188
PFLU_4966	-0.61644	0.7624
PFLU_0437	0.183837	0.998188
PFLU_4449	-0.242929	0.990972
PFLU_1212	0.0250537	0.998188
PFLU_0558	-0.0995558	0.998188
PFLU_2653	0.166481	0.998188
PFLU_1468	0.0685637	0.998188
PFLU_3843	-0.0277732	0.998391
PFLU_0183	0.0937849	0.998188
PFLU_3512	-0.311044	0.998188
PFLU_1824	-0.0724801	0.998188
PFLU_3033	-0.305754	0.998188
PFLU_1030	-0.121676	0.998188
PFLU_1591A	0.066935	0.998188
PFLU_3217	0.110555	0.998188
PFLU_4647	-0.0507511	0.998188
PFLU_2462	-0.0396808	0.998188
PFLU_5223	-0.11835	0.998188
PFLU_2136	-0.207056	0.998188
PFLU_4980	-0.0518864	0.998188
PFLU_1639	0.0525367	0.998188
PFLU_0344	0.597116	0.266725
PFLU_4078	0.0389627	0.998391
PFLU_4296	0.0794005	0.998188
PFLU_4291	0.263342	0.998188
PFLU_4904	-0.230216	0.992665
PFLU_5782	-0.256868	0.998188
PFLU_2969	-0.0443981	0.998188
PFLU_0849	0.120138	0.998188
PFLU_4950	0.215092	0.998188
PFLU_2559	0.129654	0.998188
PFLU_3750	-0.234537	0.998188
PFLU_4394	0.123939	0.998188
PFLU_0640	0.134995	0.998188
PFLU_1325	0.0972511	0.998188
PFLU_3916	-0.148818	0.998188
PFLU_6103	-0.227124	0.998188
PFLU_4228	0.208878	0.998188
PFLU_4684	-0.163347	0.998188
PFLU_0133	0.212106	0.998188
PFLU_6123	-0.148512	0.998188
PFLU_1835	-0.176752	0.998188
PFLU_6051	-0.133599	0.998188
PFLU_5707	-0.107483	0.998188
PFLU_4515	0.254567	0.998188
PFLU_1917	-0.0606577	0.998188
PFLU_2276	-0.00667981	0.998705
PFLU_1145	-0.0269213	0.998188
PFLU_0616	-0.207575	0.998188
PFLU_2886	0.126541	0.998188
PFLU_3428	0.0447304	0.998188
PFLU_3011	-0.128955	0.998188
PFLU_4845	0.0285458	0.998188
PFLU_2337	0.787263	0.266725
PFLU_3780	-0.250067	0.998188
PFLU_4251	0.00785918	0.998391
PFLU_0407	-0.0405926	0.998188
PFLU_3521	0.167264	0.998188
PFLU_3357	0.642535	0.990972
PFLU_4091	-0.0980792	0.998188
PFLU_2453	-0.018973	0.998391
PFLU_1627	0.227959	0.998188
PFLU_4160	-0.0225581	0.998391
PFLU_1011	0.176928	0.998188
PFLU_0137	0.108966	0.998188
PFLU_4361	0.207648	0.998188
PFLU_5656	-0.0642834	0.998188
PFLU_2673	0.0489416	0.998188
PFLU_2034	0.172681	0.998188
PFLU_3490	0.00823697	0.998391
PFLU_6088	0.166054	0.998188
PFLU_0055	0.131295	0.998188
PFLU_4003	0.241818	0.998188
PFLU_5262	-0.0284158	0.998188
PFLU_3183	0.646557	0.682558
PFLU_5311	-0.0523485	0.998188
PFLU_5888	-0.653136	0.990668
PFLU_3203	0.0381805	0.998188
PFLU_5853	0.165301	0.998188
PFLU_0861	-0.143134	0.998188
PFLU_0382	-0.1456	0.998188
PFLU_1473	-0.226645	0.998188
PFLU_3888	0.116919	0.998188
PFLU_1848	-0.00134267	0.998705
PFLU_4080	-0.186372	0.998188
PFLU_2935	0.204319	0.998188
PFLU_3148	0.044528	0.998188
PFLU_5685	0.0323756	0.998188
PFLU_1870	0.017743	0.998391
PFLU_1269	-0.101319	0.998188
PFLU_3495	-1.15585	0.922796
PFLU_3084	-0.177061	0.998188
PFLU_2525	-0.0360944	0.998391
PFLU_6040	0.103468	0.998188
PFLU_1400	0.0515211	0.998188
PFLU_0288	0.0432504	0.998188
PFLU_5662	0.195082	0.998188
PFLU_2913	0.305974	0.739959
PFLU_4596	-0.105759	0.998188
PFLU_4538	-0.0966779	0.998188
PFLU_4182	-0.0523402	0.998188
PFLU_1367	0.0307765	0.998188
PFLU_3497	-1.50395	0.728453
PFLU_5711	-0.0797176	0.998188
PFLU_4970	0.00375426	0.998705
PFLU_6035	-0.069094	0.998188
PFLU_5402	0.106583	0.998188
PFLU_3550	0.354037	0.989476
PFLU_2582	-0.0652285	0.998188
PFLU_3861	-0.031149	0.998391
PFLU_0929	-0.101493	0.998188
PFLU_5864	-0.225319	0.998188
PFLU_3267	0.157125	0.998188
PFLU_0559	-0.282693	0.998188
PFLU_3774	-0.0971714	0.998188
PFLU_4686	0.0209795	0.998188
PFLU_1449	-0.0762249	0.998188
PFLU_3803	0.146726	0.998188
PFLU_0279	0.487854	0.990668
PFLU_3218	-0.0234792	0.998188
PFLU_4153	-0.0988985	0.998188
PFLU_5575	-0.113923	0.998188
PFLU_5160	-0.0683404	0.998188
PFLU_0222	0.152116	0.998188
PFLU_1475	-0.269366	0.998188
PFLU_0097	-0.344265	0.998188
PFLU_4075	0.163498	0.998188
PFLU_0138	-0.725727	0.990972
PFLU_3477	-0.0653519	0.998188
PFLU_4563	-0.0254093	0.998188
PFLU_0819	0.1015	0.998188
PFLU_0095	0.0378339	0.998188
PFLU_1371	0.16464	0.998188
PFLU_6074	0.0857479	0.998188
PFLU_2119	0.25844	0.998188
PFLU_3900	-0.213443	0.998188
PFLU_1472	-0.0868311	0.998188
PFLU_0205	-0.0394585	0.998188
PFLU_5436	-0.167849	0.998188
PFLU_6124	-0.137484	0.998188
PFLU_5419	-0.182584	0.998188
PFLU_4047	0.307429	0.998188
PFLU_2046	-0.120668	0.998188
PFLU_6037	-0.136476	0.998188
PFLU_5342	-0.359297	0.86393
PFLU_2756	-0.157117	0.998188
PFLU_4043	0.681732	0.616112
PFLU_0700	-0.242364	0.998188
PFLU_3502	-0.0182776	0.998391
PFLU_1054	-0.178706	0.998188
PFLU_5357	0.21797	0.998188
PFLU_5404	-0.0896478	0.998188
PFLU_5591	0.00292725	0.998705
PFLU_1997	0.138006	0.998188
PFLU_1295	-0.00600237	0.998391
PFLU_5161	-0.0838889	0.998188
PFLU_4308	-0.0496148	0.998188
PFLU_4008	-0.0107481	0.998391
PFLU_0502	-0.108412	0.998188
PFLU_3538	-0.352246	0.998188
PFLU_2892	-0.0937911	0.998188
PFLU_5088	0.071071	0.998188
PFLU_5785	-0.105047	0.998188
PFLU_5648	0.153676	0.998188
PFLU_3311	-0.556519	0.296594
PFLU_2693	-0.0100295	0.998391
PFLU_2109	0.306339	0.990668
PFLU_0888	0.101391	0.998188
PFLU_4312	-0.176308	0.998188
PFLU_5195	0.0732737	0.998188
PFLU_2787	-0.458462	0.933597
PFLU_1967	0.265376	0.998188
PFLU_5461	-0.126033	0.998188
PFLU_2879	-0.802761	0.883908
PFLU_3814	-0.215677	0.998188
PFLU_5619	-0.0969975	0.998188
PFLU_2022	0.322084	0.867981
PFLU_0162	0.175054	0.998188
PFLU_3398	-0.21522	0.998188
PFLU_0165	-0.525784	0.867981
PFLU_2659	0.0277223	0.998188
PFLU_0136	-0.0343608	0.998188
PFLU_0463	0.0326256	0.998188
PFLU_5854	-0.368762	0.9669
PFLU_4763	0.138862	0.998188
PFLU_1195	-0.121372	0.998188
PFLU_1655	-0.150284	0.998188
PFLU_3470	0.123888	0.998188
PFLU_4077	-0.536043	0.998188
PFLU_3541	0.000133108	0.999731
PFLU_3882	0.161208	0.998188
PFLU_2353	0.285254	0.953196
PFLU_2289	0.252383	0.998188
PFLU_2277	0.533527	0.739959
PFLU_1528	0.188966	0.998188
PFLU_3966	0.141024	0.998188
PFLU_5142	-0.518131	0.998188
PFLU_0106	0.0670528	0.998188
PFLU_0300	0.0396201	0.998188
PFLU_2397	0.30047	0.990668
PFLU_3185	0.103743	0.998188
PFLU_0739	-0.182421	0.998188
PFLU_4838	0.0315426	0.998188
PFLU_5337	-0.0649129	0.998188
PFLU_0448	0.0495818	0.998188
PFLU_1451	-0.0139989	0.998391
PFLU_3893	-0.0116838	0.998391
PFLU_0783	-0.113056	0.998188
PFLU_5492	0.10495	0.998188
PFLU_4032	0.263303	0.998188
PFLU_0337	0.0215689	0.998188
PFLU_5663	0.0421443	0.998188
PFLU_0798	-0.0773675	0.998188
PFLU_2105	0.105844	0.998188
PFLU_0953	0.03714	0.998188
PFLU_2822	0.0198153	0.998391
PFLU_3720	0.184695	0.998188
PFLU_3071	0.858212	0.228638
PFLU_3921	-0.11849	0.998188
PFLU_5384	-0.0433715	0.998188
PFLU_3563	0.0398443	0.998188
PFLU_1099	-0.034069	0.998188
PFLU_5348	0.194086	0.998188
PFLU_4667	0.304792	0.998188
PFLU_5930	-0.150649	0.998188
PFLU_3939	0.432468	0.86393
PFLU_4331	0.0676508	0.998188
PFLU_0617	-0.164707	0.998188
PFLU_3934	-0.531014	0.998188
PFLU_2844	-0.0781157	0.998188
PFLU_1219	-0.193717	0.990668
PFLU_0472	-0.0756034	0.998188
PFLU_1118	-0.355996	0.728453
PFLU_1921	0.190251	0.998188
PFLU_4125	0.142716	0.998188
PFLU_2280	-0.00843854	0.998391
PFLU_6073	-0.155829	0.998188
PFLU_0013	-0.125338	0.998188
PFLU_4837	-0.0453961	0.998188
PFLU_3378	-0.0603709	0.998188
PFLU_1424	0.287617	0.89392
PFLU_1805	-0.0559897	0.998188
PFLU_3698	-0.370594	0.998188
PFLU_3403	0.0414048	0.998188
PFLU_1880	-0.161411	0.998188
PFLU_3128	-0.0192738	0.998391
PFLU_4204	0.16021	0.998188
PFLU_0412	-0.133504	0.998188
PFLU_2145	0.0372297	0.998188
PFLU_0018	-0.15329	0.998188
PFLU_5721	-0.232168	0.998188
PFLU_1338	0.0737615	0.998188
PFLU_5116	-0.0962288	0.998188
PFLU_1447	0.254237	0.992665
PFLU_0270	-0.187146	0.989476
PFLU_2018	-0.409866	0.998188
PFLU_1329	-0.0414539	0.998188
[truncated: 1,035 more rows]

## Sheet: H
	LFC Che 1 dpi	LFC Ti 1 dpi	LFC Che 5 dpi	LFC Ti 5 dpi
PFLU_1043	-1.51753	-5.14473	-1.05542	-2.3049
PFLU_2453	1.52651	1.00176	0.87999	0.861017
PFLU_2454	2.37909	1.06162	0.700041	0.446315
PFLU_3089	0.372735	3.29692	0.915738	2.41049
PFLU_3090	0.0631972	3.83946	0.158861	2.78749
PFLU_3091	-0.0965678	4.11394	0.0930235	2.79351
PFLU_3092	-0.283375	2.98798	0.150572	2.00927
PFLU_3094	-0.505978	0.699162	-0.49538	0.141099
PFLU_3097	-0.648749	1.25804	-0.563187	0.488588
PFLU_3098	-0.288693	1.54644	-0.288527	0.300016
PFLU_3529	2.33536	1.12782	2.10824	1.73573
PFLU_3735	-5.06255	-4.02393	-6.28659	-6.09448
PFLU_4036	1.84355	0.627785	0.865352	1.16854
PFLU_4463	5.10571	1.89383	3.80029	1.44259

## Sheet: I
Ratio of CFU relative to SBW25 WT_lacZ
WT:WT_C	WT:WT_T	Δ4463:WT_C	Δ4463:WT_T	Δ3091:WT_C	Δ3091:WT_T
0.8	1.03333	0.16	1	0.772727	0.684211
1.13333	0.714286	0.44	0.6	1.15385	0.684211
0.75	1.08	0.5	0.621622	0.769231	1.05263
0.782609	1.27778	0.8	1.05263	1.07143	1
1	1.4	1.05882	1.5	0.777778	0.483871
1.08	0.916667	0.583333	0.90625	0.75	0.722222
1.4	1.09091	0.5625	0.736842	0.666667	0.717949
1.07407	0.863636	0.404255	1.05714	1.25	1.1
1	0.75	0.884615	0.541667	0.95	0.842105
	1.07143		0.571429	0.806452
