# Supplementary material for: The genotype of barley cultivars influences multiple aspects of their associated microbiota via differential root exudate secretion
Source: PLoS Biol. 2024 Apr 25;22(4):e3002232. doi: 10.1371/journal.pbio.3002232 (PMC11045101; doi:10.1371/journal.pbio.3002232)
Supplement: S7 Data — (XLSX) [file pbio.3002232.s022.xlsx]

## Sheet: Sheet1
	DW relative to uninoculated controls
	CxCRh	CxTRh	TxTRh	TxCRh	CxCPs	CxTPs	TxTPs	TxCPs
Experiment 1	-1.82841	94.6554	23.6439	3.77359	70.1828	48.8045	-2.00472	-21.816
	66.3818	22.0798	-64.1038	-45.4946	12.6781	13.3903	-61.7042	-27.4731
	40.1763	-15.7431	1.73681	-44.8898	18.6398	-8.69018	-7.48163	23.5137
	79.7563	3.37395	14.9385	59.1388	-22.9616	5.81068	29.0861	18.8049
	34.4414	14.8661	53.1553	-15.6149	-55.9557	1.20037	-4.20712	-24.1909
	20.5414	36.6242	-55.6818	-51.555	129.777	53.3439	-1.43541	-40.8493
	38.477	-14.4289	188.715	10.815	-29.5591	-40.982	58.1505	47.9624
	94.171	38.9896	-23.1973	-45.668	22.6684	19.0415	-5.14254	-56.0648
	-16.9924	-31.9456	13.2979	-9.3617	27.2727	-48.6831	21.2766	5.42553
	204.019	113.712	-39.2233	-35.8576	121.513	1.41844	-25.6958	-40.5825
Experiment 2	-28.0564	-10.5016	-3.15041	51.3211	-30.721	25.5486	-1.01626	-19.9187
	143.191	70.6226	-22.8947	-36.7105	45.1362	92.8016	-31.4474	-39.7368
	34.5912	63.3124	-19.4344	-18.4191	-3.56394	107.966	-62.8716	-59.2458
	-57.0129	-46.8537	-10.8398	-4.98047	-56.7096	-57.6194	-50.0977	-26.4648
	-1.31406	-22.9961	38.8298	-10.1064	-22.7332	12.7464	-6.91489	-35.3191
	16.9687	49.5881	44.4444	59.5716	-17.2982	60.2965	-1.47256	-27.0415
	58.7583	90.9091	-5.52699	7.45501	91.3525	78.714	10.2828	44.2159
	-7.71114	-20.0734	-13.7444	-20.6538	40.2693	20.0734	-33.8039	-42.4963
	111.509	90	97.3886	7.06605	-29.6226	13.3962	23.3487	36.5591
	75.5	25.6667	15.658	-8.35735	-4.16667	8.33333	-44.4765	-53.5062
