# Supplementary material for: The genotype of barley cultivars influences multiple aspects of their associated microbiota via differential root exudate secretion
Source: PLoS Biol. 2024 Apr 25;22(4):e3002232. doi: 10.1371/journal.pbio.3002232 (PMC11045101; doi:10.1371/journal.pbio.3002232)
Supplement: S8 Data — (XLSX) [file pbio.3002232.s023.xlsx]

## Sheet: A
	Observed	Shannon	Cultivar	Material	Rep
Che_Rhiz_2	1635	6.29935	Chevallier	rhizosphere	1
Che_Rhiz_3	1693	6.17886	Chevallier	rhizosphere	2
Che_Rhiz_4	1761	6.24628	Chevallier	rhizosphere	3
Che_Rhiz_5	1489	6.13397	Chevallier	rhizosphere	4
Che_Rhiz_6	1759	6.20821	Chevallier	rhizosphere	5
Soil_1	1617	6.35879	Soil	bulk_soil	1
Soil_2	2070	6.49727	Soil	bulk_soil	2
Soil_3	1817	6.43035	Soil	bulk_soil	3
Soil_4	1503	6.12995	Soil	bulk_soil	4
Soil_5	1746	6.43454	Soil	bulk_soil	5
Ti_Rhiz_1	1646	6.16517	Tipple	rhizosphere	1
Ti_Rhiz_2	1650	6.19043	Tipple	rhizosphere	2
Ti_Rhiz_4	1556	6.27869	Tipple	rhizosphere	3
Ti_Rhiz_5	1815	6.23339	Tipple	rhizosphere	4
Ti_Rhiz_6	2044	6.1818	Tipple	rhizosphere	5

## Sheet: B
	Observed	Shannon	Cultivar	Material	Rep
Che_Roots_2	1544	4.36889	Chevallier	roots	1
Che_Roots_3	821	4.26744	Chevallier	roots	2
Che_Roots_4	1325	3.85109	Chevallier	roots	3
Che_Roots_5	1389	5.36811	Chevallier	roots	4
Che_Roots_6	1598	5.65612	Chevallier	roots	5
Ti_Roots_1	1932	5.10351	Tipple	roots	1
Ti_Roots_2	1625	5.38505	Tipple	roots	2
Ti_Roots_4	1625	4.9419	Tipple	roots	3
Ti_Roots_5	1699	6.00736	Tipple	roots	4
Ti_Roots_6	1586	5.57543	Tipple	roots	5

## Sheet: C
	Observed	Shannon	Cultivar	Material	Rep
Che_Rhiz_2	1635	6.29935	Chevallier	rhizosphere	1
Che_Rhiz_3	1693	6.17886	Chevallier	rhizosphere	2
Che_Rhiz_4	1761	6.24628	Chevallier	rhizosphere	3
Che_Rhiz_5	1489	6.13397	Chevallier	rhizosphere	4
Che_Rhiz_6	1759	6.20821	Chevallier	rhizosphere	5
Che_Roots_2	1544	4.36889	Chevallier	roots	1
Che_Roots_3	821	4.26744	Chevallier	roots	2
Che_Roots_4	1325	3.85109	Chevallier	roots	3
Che_Roots_5	1389	5.36811	Chevallier	roots	4
Che_Roots_6	1598	5.65612	Chevallier	roots	5

## Sheet: D
	Observed	Shannon	Cultivar	Material	Rep
Ti_Rhiz_1	1646	6.16517	Tipple	rhizosphere	1
Ti_Rhiz_2	1650	6.19043	Tipple	rhizosphere	2
Ti_Rhiz_4	1556	6.27869	Tipple	rhizosphere	3
Ti_Rhiz_5	1815	6.23339	Tipple	rhizosphere	4
Ti_Rhiz_6	2044	6.1818	Tipple	rhizosphere	5
Ti_Roots_1	1932	5.10351	Tipple	roots	1
Ti_Roots_2	1625	5.38505	Tipple	roots	2
Ti_Roots_4	1625	4.9419	Tipple	roots	3
Ti_Roots_5	1699	6.00736	Tipple	roots	4
Ti_Roots_6	1586	5.57543	Tipple	roots	5
