# Supplementary material for: The genotype of barley cultivars influences multiple aspects of their associated microbiota via differential root exudate secretion
Source: PLoS Biol. 2024 Apr 25;22(4):e3002232. doi: 10.1371/journal.pbio.3002232 (PMC11045101; doi:10.1371/journal.pbio.3002232)
Supplement: S9 Data — (XLSX) [file pbio.3002232.s024.xlsx]

## Sheet: A
	Observed	Shannon	Cultivar	Material	Rep
Che_Rhiz_2	166	2.02702	Chevallier	rhizosphere	1
Che_Rhiz_3	125	2.26665	Chevallier	rhizosphere	2
Che_Rhiz_4	197	2.14461	Chevallier	rhizosphere	3
Che_Rhiz_5	211	2.91397	Chevallier	rhizosphere	4
Che_Rhiz_6	180	1.06198	Chevallier	rhizosphere	5
Soil_1	298	3.53942	Soil	bulk_soil	1
Soil_2	270	3.6245	Soil	bulk_soil	2
Soil_3	268	3.26496	Soil	bulk_soil	3
Soil_4	278	3.22727	Soil	bulk_soil	4
Soil_5	318	3.33307	Soil	bulk_soil	5
Ti_Rhiz_1	260	3.45059	Tipple	rhizosphere	1
Ti_Rhiz_2	265	3.1187	Tipple	rhizosphere	2
Ti_Rhiz_4	298	3.528	Tipple	rhizosphere	3
Ti_Rhiz_5	229	2.75856	Tipple	rhizosphere	4
Ti_Rhiz_6	240	3.37161	Tipple	rhizosphere	5

## Sheet: B
	Observed	Shannon	Cultivar	Material	Rep
Che_Roots_2	207	2.05556	Chevallier	roots	1
Che_Roots_3	189	1.66045	Chevallier	roots	2
Che_Roots_4	199	2.57888	Chevallier	roots	3
Che_Roots_5	209	2.73672	Chevallier	roots	4
Che_Roots_6	191	2.45773	Chevallier	roots	5
Ti_Roots_1	204	2.27153	Tipple	roots	1
Ti_Roots_2	201	1.43451	Tipple	roots	2
Ti_Roots_4	183	1.91334	Tipple	roots	3
Ti_Roots_5	173	1.64748	Tipple	roots	4
Ti_Roots_6	103	1.04791	Tipple	roots	5

## Sheet: C
	Observed	Shannon	Cultivar	Material	Rep
Che_Rhiz_2	166	2.02702	Chevallier	rhizosphere	1
Che_Rhiz_3	125	2.26665	Chevallier	rhizosphere	2
Che_Rhiz_4	197	2.14461	Chevallier	rhizosphere	3
Che_Rhiz_5	211	2.91397	Chevallier	rhizosphere	4
Che_Rhiz_6	180	1.06198	Chevallier	rhizosphere	5
Che_Roots_2	207	2.05556	Chevallier	roots	1
Che_Roots_3	189	1.66045	Chevallier	roots	2
Che_Roots_4	199	2.57888	Chevallier	roots	3
Che_Roots_5	209	2.73672	Chevallier	roots	4
Che_Roots_6	191	2.45773	Chevallier	roots	5

## Sheet: D
	Observed	Shannon	Cultivar	Material	Rep
Ti_Rhiz_1	260	3.45059	Tipple	rhizosphere	1
Ti_Rhiz_2	265	3.1187	Tipple	rhizosphere	2
Ti_Rhiz_4	298	3.528	Tipple	rhizosphere	3
Ti_Rhiz_5	229	2.75856	Tipple	rhizosphere	4
Ti_Rhiz_6	240	3.37161	Tipple	rhizosphere	5
Ti_Roots_1	204	2.27153	Tipple	roots	1
Ti_Roots_2	201	1.43451	Tipple	roots	2
Ti_Roots_4	183	1.91334	Tipple	roots	3
Ti_Roots_5	173	1.64748	Tipple	roots	4
Ti_Roots_6	103	1.04791	Tipple	roots	5
