# Supplementary material for: The genotype of barley cultivars influences multiple aspects of their associated microbiota via differential root exudate secretion
Source: PLoS Biol. 2024 Apr 25;22(4):e3002232. doi: 10.1371/journal.pbio.3002232 (PMC11045101; doi:10.1371/journal.pbio.3002232)
Supplement: S10 Data — (XLSX) [file pbio.3002232.s025.xlsx]

## Sheet: A
	0	1	2	3
Chevallier	57	20.1681	15.1261	7.56303
Tipple	79.661	9.32203	8.47458	2.54237
Soil	86.1111	11.1111	2.77778	0

## Sheet: B
	YES	NO
Chevallier	38.6555	61.3445
Tipple	33.0508	66.9492
Soil	22.2222	77.7778

## Sheet: C
	YES	NO
Chevallier	35.5932	64.4068
Tipple	17.2414	82.7586
Soil	28.169	71.831

## Sheet: D
	Chevallier	Tipple	Soil
Chevallier	1
Tipple	0.0025	1
Soil	0.0002	0.2125	1

## Sheet: E
	Chevallier	Tipple	Soil
Chevallier	1
Tipple	0.3684	1
Soil	0.0187	0.1103	1

## Sheet: F
	Chevallier	Tipple	Soil
Chevallier	1
Tipple	0.0015	1
Soil	0.2924	0.077	1

## Sheet: G
	0	1	2	3
Chevallier	40.8333	17.5	26.6667	15
Tipple	48.3051	14.4068	22.8814	14.4068
Soil	66.6667	15	18.0556	0

## Sheet: H
	0	1	2	3
Chevallier	79.1667	3.33333	10	7.5
Tipple	86.6667	12.5	0	0.833333
Soil	86.3014	1.36986	1.36986	10.9589

## Sheet: I
	0	1	2	3
Chevallier	39.4958	33.6134	16.8067	10.084
Tipple	25.641	56.4103	14.5299	3.4188
Soil	40.8451	53.5211	2.8169	2.8169

## Sheet: J
	Chevallier	Tipple	Soil
Chevallier	1
Tipple	0.6914	1
Soil	0.0004	0.0035	1

[truncated: 2 more sheets: K, L]
