# Supplementary material for: The genotype of barley cultivars influences multiple aspects of their associated microbiota via differential root exudate secretion
Source: PLoS Biol. 2024 Apr 25;22(4):e3002232. doi: 10.1371/journal.pbio.3002232 (PMC11045101; doi:10.1371/journal.pbio.3002232)
Supplement: S11 Data — (XLSX) [file pbio.3002232.s026.xlsx]

## Sheet: A
time (h)	SBW25			Δ6072			Δ3500			Δ2414			Δ2583			Δ5080			Δ0315			Δ3295			Δ1533
0	0.055	0.052	0.066	0.049	0.024	0.033	0.038	0.054	0.033	0.04	0.034	0.051	0.042	0.036	0.035	0.033	0.034	0.053	0.044	0.035	0.04	0.045	0.033	0.036	0.031	0.04	0.029
1	0.067	0.061	0.076	0.048	0.028	0.031	0.037	0.052	0.032	0.031	0.038	0.056	0.037	0.039	0.034	0.036	0.041	0.057	0.042	0.037	0.047	0.047	0.041	0.039	0.036	0.049	0.036
2	0.087	0.074	0.091	0.064	0.046	0.052	0.053	0.072	0.055	0.065	0.054	0.079	0.057	0.056	0.05	0.05	0.053	0.081	0.073	0.076	0.064	0.073	0.07	0.061	0.059	0.078	0.057
3	0.121	0.118	0.124	0.103	0.087	0.089	0.096	0.106	0.081	0.092	0.099	0.103	0.092	0.091	0.086	0.081	0.068	0.096	0.114	0.103	0.117	0.11	0.102	0.101	0.1	0.105	0.095
4	0.178	0.157	0.172	0.156	0.136	0.134	0.153	0.157	0.114	0.142	0.136	0.147	0.146	0.122	0.134	0.13	0.12	0.159	0.135	0.162	0.178	0.166	0.147	0.127	0.141	0.143	0.117
5	0.257	0.257	0.227	0.222	0.209	0.196	0.227	0.201	0.208	0.229	0.226	0.221	0.19	0.211	0.194	0.159	0.141	0.223	0.237	0.271	0.251	0.254	0.191	0.234	0.224	0.226	0.215
6	0.602	0.31	0.433	0.33	0.385	0.294	0.352	0.395	0.48	0.525	0.347	0.442	0.465	0.54	0.333	0.541	0.285	0.655	0.585	0.478	0.449	0.523	0.731	0.649	0.69	0.694	0.599
7	0.816	0.663	0.753	0.647	0.788	0.612	0.622	0.748	0.843	0.595	0.554	0.674	0.759	0.594	0.596	0.841	0.761	0.849	0.634	0.759	0.715	0.717	0.754	0.669	0.989	0.831	0.859
8	1.218	1.11	1.007	1.094	1.101	1.13	1.188	1.087	1.253	1.098	1.166	1.193	1.151	0.984	1.017	1.062	0.876	1.107	1.149	1.276	1.224	1.287	1.343	1.242	1.217	1.193	1.174
9	1.419	1.375	1.416	1.253	1.298	1.286	1.43	1.393	1.36	1.35	1.393	1.424	1.314	1.361	1.357	1.392	1.259	1.365	1.385	1.466	1.508	1.496	1.573	1.496	1.426	1.419	1.373
10	1.544	1.539	1.521	1.392	1.439	1.454	1.579	1.534	1.54	1.491	1.533	1.561	1.459	1.532	1.543	1.513	1.448	1.531	1.542	1.601	1.609	1.598	1.65	1.62	1.528	1.521	1.517
11	1.641	1.613	1.652	1.497	1.56	1.536	1.658	1.662	1.638	1.623	1.663	1.677	1.6	1.654	1.691	1.638	1.647	1.657	1.683	1.726	1.747	1.728	1.782	1.772	1.661	1.661	1.657
12	1.693	1.71	1.728	1.584	1.656	1.615	1.742	1.742	1.761	1.715	1.766	1.767	1.686	1.728	1.762	1.746	1.717	1.754	1.752	1.757	1.78	1.775	1.815	1.791	1.726	1.734	1.736
13	1.723	1.728	1.783	1.656	1.692	1.654	1.809	1.822	1.837	1.753	1.774	1.797	1.71	1.784	1.807	1.79	1.751	1.766	1.787	1.782	1.802	1.799	1.858	1.815	1.774	1.781	1.79
14	1.749	1.76	1.826	1.666	1.713	1.689	1.817	1.828	1.86	1.808	1.819	1.839	1.741	1.815	1.856	1.831	1.801	1.766	1.801	1.815	1.829	1.833	1.907	1.85	1.807	1.821	1.834
15	1.777	1.787	1.819	1.668	1.716	1.689	1.808	1.829	1.858	1.807	1.836	1.821	1.734	1.807	1.832	1.819	1.808	1.776	1.808	1.826	1.833	1.827	1.889	1.853	1.806	1.826	1.843
16	1.777	1.786	1.825	1.67	1.73	1.706	1.811	1.847	1.886	1.806	1.83	1.843	1.736	1.817	1.846	1.839	1.828	1.78	1.816	1.813	1.847	1.828	1.885	1.853	1.811	1.825	1.848
17	1.793	1.778	1.833	1.668	1.733	1.72	1.813	1.855	1.877	1.82	1.83	1.847	1.733	1.824	1.843	1.837	1.821	1.781	1.819	1.801	1.839	1.802	1.868	1.848	1.792	1.83	1.85
18	1.77	1.783	1.815	1.656	1.723	1.708	1.791	1.812	1.88	1.788	1.817	1.807	1.694	1.795	1.828	1.803	1.805	1.766	1.8	1.78	1.822	1.782	1.854	1.82	1.784	1.802	1.836
19	1.739	1.736	1.772	1.621	1.694	1.689	1.744	1.781	1.827	1.749	1.774	1.763	1.652	1.744	1.794	1.756	1.762	1.726	1.764	1.746	1.779	1.746	1.81	1.779	1.75	1.791	1.821
20	1.706	1.693	1.723	1.601	1.666	1.67	1.706	1.737	1.807	1.733	1.737	1.723	1.621	1.707	1.76	1.732	1.722	1.693	1.756	1.713	1.752	1.724	1.79	1.758	1.751	1.781	1.808
21	1.673	1.663	1.701	1.57	1.637	1.631	1.665	1.708	1.772	1.697	1.702	1.684	1.589	1.674	1.733	1.699	1.691	1.665	1.726	1.693	1.736	1.708	1.758	1.732	1.727	1.767	1.812
22	1.633	1.624	1.654	1.535	1.61	1.604	1.622	1.667	1.747	1.665	1.647	1.629	1.533	1.633	1.681	1.645	1.653	1.627	1.703	1.665	1.692	1.658	1.724	1.688	1.702	1.737	1.772
23	1.593	1.576	1.618	1.492	1.575	1.564	1.56	1.628	1.722	1.621	1.587	1.571	1.483	1.591	1.641	1.59	1.608	1.571	1.681	1.633	1.67	1.616	1.674	1.652	1.679	1.707	1.757
24	1.543	1.509	1.568	1.461	1.539	1.531	1.489	1.581	1.686	1.577	1.542	1.521	1.447	1.543	1.585	1.545	1.556	1.526	1.637	1.592	1.616	1.571	1.636	1.607	1.648	1.673	1.725
25	1.502	1.485	1.522	1.42	1.484	1.486	1.438	1.545	1.643	1.549	1.496	1.469	1.404	1.503	1.538	1.501	1.509	1.481	1.613	1.551	1.585	1.529	1.589	1.55	1.614	1.642	1.69
26	1.465	1.441	1.497	1.369	1.439	1.436	1.402	1.505	1.607	1.515	1.461	1.414	1.37	1.466	1.5	1.442	1.458	1.436	1.585	1.515	1.548	1.495	1.554	1.528	1.58	1.624	1.673
27	1.415	1.416	1.445	1.314	1.377	1.374	1.369	1.464	1.562	1.472	1.423	1.387	1.353	1.419	1.445	1.425	1.44	1.408	1.566	1.48	1.513	1.451	1.518	1.488	1.534	1.577	1.634
28	1.4	1.407	1.419	1.262	1.314	1.319	1.337	1.438	1.521	1.448	1.421	1.374	1.332	1.417	1.418	1.396	1.431	1.387	1.542	1.462	1.49	1.435	1.504	1.464	1.516	1.547	1.61
29	1.4	1.406	1.409	1.234	1.289	1.287	1.34	1.427	1.501	1.435	1.414	1.359	1.336	1.426	1.425	1.395	1.433	1.378	1.541	1.46	1.499	1.433	1.493	1.477	1.51	1.537	1.603
30	1.4	1.394	1.398	1.211	1.259	1.249	1.319	1.392	1.491	1.443	1.4	1.35	1.347	1.408	1.404	1.398	1.443	1.392	1.522	1.462	1.485	1.414	1.502	1.455	1.492	1.525	1.578
31	1.395	1.397	1.393	1.208	1.239	1.228	1.309	1.39	1.506	1.424	1.41	1.352	1.349	1.413	1.398	1.403	1.443	1.401	1.518	1.462	1.486	1.42	1.488	1.425	1.494	1.507	1.56
32	1.424	1.392	1.408	1.212	1.246	1.235	1.332	1.424	1.513	1.436	1.415	1.361	1.353	1.445	1.41	1.408	1.438	1.394	1.523	1.468	1.473	1.44	1.492	1.444	1.475	1.521	1.574
33	1.413	1.392	1.43	1.224	1.246	1.239	1.35	1.423	1.509	1.451	1.42	1.362	1.346	1.424	1.412	1.417	1.432	1.4	1.504	1.457	1.468	1.413	1.48	1.435	1.489	1.513	1.559
34	1.406	1.383	1.418	1.221	1.253	1.249	1.359	1.414	1.494	1.463	1.409	1.38	1.351	1.424	1.421	1.436	1.45	1.4	1.531	1.453	1.474	1.418	1.494	1.444	1.498	1.501	1.554
35	1.426	1.418	1.402	1.207	1.244	1.256	1.363	1.442	1.491	1.441	1.428	1.38	1.347	1.444	1.427	1.446	1.457	1.41	1.521	1.479	1.484	1.411	1.494	1.449	1.497	1.492	1.546
36	1.418	1.396	1.407	1.209	1.238	1.23	1.357	1.413	1.488	1.453	1.413	1.397	1.351	1.416	1.405	1.426	1.459	1.411	1.526	1.473	1.464	1.409	1.492	1.445	1.5	1.491	1.547

## Sheet: B
time (h)	SBW25			Δ6072			Δ3500			Δ2414			Δ2583			Δ5080			Δ0315			Δ3295			Δ1533
0	-0.009	-0.021	0.005	0.076	-0.024	0.878	0.055	0.052	-0.016	0.002	-0.017	-0.01	-0.003	0.007	-0.023	0.033	0.035	0.015	0.827	0.019	1.042	-0.029	-0.028	0.05	0.039	-0.01	-0.039
1	0.015	-0.002	0.032	0.099	0.002	0.818	0.088	0.086	0.011	0.03	0.024	0.024	0.031	0.04	-0.00021	0.078	0.076	0.056	0.668	0.059	0.996	-0.002	-0.001	0.08	0.077	0.017	-0.013
2	0.041	0.035	0.076	0.119	0.025	0.531	0.108	0.135	0.046	0.055	0.052	0.053	0.076	0.076	0.036	0.128	0.127	0.094	0.646	0.105	0.996	0.025	0.029	0.105	0.107	0.054	0.021
3	0.076	0.075	0.112	0.165	0.066	0.628	0.164	0.163	0.096	0.092	0.099	0.085	0.115	0.11	0.071	0.163	0.175	0.131	0.393	0.148	0.965	0.067	0.065	0.139	0.154	0.091	0.06
4	0.115	0.11	0.15	0.219	0.114	0.429	0.219	0.229	0.147	0.134	0.148	0.136	0.177	0.168	0.115	0.226	0.227	0.197	0.365	0.2	0.934	0.116	0.111	0.191	0.2	0.132	0.107
5	0.132	0.132	0.182	0.218	0.132	0.311	0.216	0.248	0.157	0.167	0.154	0.15	0.202	0.174	0.141	0.251	0.249	0.213	0.405	0.225	0.968	0.137	0.134	0.198	0.193	0.165	0.12
6	0.176	0.187	0.219	0.272	0.192	0.427	0.299	0.279	0.225	0.22	0.217	0.193	0.256	0.238	0.179	0.291	0.303	0.266	0.306	0.287	0.589	0.194	0.196	0.25	0.237	0.206	0.185
7	0.203	0.217	0.252	0.312	0.221	0.42	0.326	0.314	0.257	0.248	0.248	0.225	0.296	0.27	0.215	0.324	0.335	0.291	0.342	0.305	0.558	0.209	0.212	0.269	0.262	0.236	0.208
8	0.214	0.233	0.271	0.335	0.24	0.447	0.345	0.33	0.277	0.264	0.268	0.241	0.322	0.291	0.235	0.337	0.348	0.308	0.365	0.327	0.52	0.239	0.234	0.285	0.279	0.257	0.234
9	0.236	0.259	0.295	0.359	0.266	0.478	0.373	0.355	0.298	0.297	0.278	0.266	0.352	0.309	0.26	0.367	0.377	0.338	0.394	0.349	0.549	0.261	0.259	0.32	0.306	0.29	0.262
10	0.262	0.29	0.329	0.395	0.29	0.525	0.397	0.378	0.329	0.333	0.315	0.296	0.378	0.346	0.296	0.396	0.406	0.374	0.439	0.386	0.588	0.299	0.295	0.356	0.338	0.323	0.296
11	0.3	0.32	0.364	0.427	0.326	0.568	0.426	0.42	0.369	0.362	0.348	0.331	0.413	0.374	0.323	0.429	0.436	0.408	0.491	0.422	0.632	0.33	0.334	0.398	0.37	0.357	0.33
12	0.344	0.35	0.407	0.461	0.363	0.6	0.452	0.468	0.396	0.404	0.382	0.367	0.45	0.389	0.36	0.47	0.467	0.442	0.573	0.458	0.697	0.367	0.361	0.437	0.383	0.393	0.352
13	0.386	0.387	0.449	0.492	0.394	0.642	0.482	0.498	0.429	0.443	0.416	0.405	0.482	0.429	0.395	0.499	0.492	0.486	0.629	0.496	0.75	0.408	0.408	0.479	0.424	0.418	0.394
14	0.423	0.442	0.486	0.526	0.436	0.695	0.537	0.546	0.487	0.492	0.477	0.452	0.521	0.473	0.438	0.555	0.548	0.542	0.666	0.551	0.783	0.443	0.459	0.523	0.468	0.464	0.442
15	0.472	0.471	0.533	0.558	0.475	0.719	0.551	0.572	0.51	0.538	0.507	0.493	0.559	0.495	0.466	0.591	0.582	0.586	0.729	0.597	0.829	0.478	0.499	0.569	0.49	0.501	0.467
16	0.513	0.512	0.552	0.587	0.517	0.77	0.597	0.609	0.55	0.571	0.547	0.53	0.583	0.529	0.516	0.63	0.624	0.64	0.777	0.653	0.854	0.517	0.55	0.617	0.543	0.54	0.521
17	0.562	0.549	0.601	0.621	0.555	0.803	0.619	0.653	0.61	0.633	0.583	0.584	0.637	0.565	0.553	0.687	0.69	0.698	0.857	0.714	0.912	0.569	0.597	0.654	0.572	0.581	0.57
18	0.613	0.598	0.659	0.65	0.613	0.842	0.667	0.697	0.66	0.667	0.627	0.622	0.669	0.602	0.602	0.713	0.719	0.759	0.925	0.758	0.957	0.606	0.678	0.701	0.616	0.623	0.616
19	0.664	0.636	0.68	0.65	0.657	0.884	0.681	0.721	0.739	0.711	0.665	0.649	0.687	0.634	0.642	0.752	0.751	0.822	0.951	0.779	0.981	0.643	0.699	0.728	0.646	0.649	0.644
20	0.729	0.679	0.736	0.702	0.713	0.898	0.726	0.781	0.763	0.759	0.742	0.735	0.738	0.671	0.699	0.84	0.833	0.92	1.022	0.854	1.044	0.694	0.769	0.783	0.693	0.72	0.688
21	0.778	0.738	0.765	0.723	0.776	0.931	0.755	0.811	0.831	0.827	0.772	0.742	0.75	0.697	0.731	0.903	0.87	0.988	1.073	0.905	1.065	0.75	0.804	0.838	0.725	0.736	0.752
22	0.865	0.81	0.845	0.756	0.872	0.951	0.782	0.851	0.879	0.879	0.822	0.817	0.816	0.729	0.791	0.971	0.963	1.046	1.189	0.972	1.165	0.789	0.869	0.919	0.776	0.782	0.816
23	0.939	0.876	0.866	0.779	0.925	0.98	0.817	0.89	0.941	0.909	0.889	0.852	0.841	0.757	0.833	1.043	1.027	1.216	1.236	1.033	1.309	0.849	0.927	0.997	0.813	0.844	0.857
24	0.995	0.933	0.902	0.809	0.955	1.016	0.87	0.92	0.999	0.983	0.936	0.884	0.873	0.8	0.86	1.088	1.094	1.221	1.296	1.087	1.359	0.896	0.98	1.047	0.844	0.882	0.945
25	1.074	1.023	0.968	0.843	1.074	1.038	0.894	0.99	1.091	1.061	1.024	0.967	0.915	0.839	0.929	1.197	1.154	1.3	1.39	1.149	1.312	0.946	1.058	1.107	0.903	0.963	0.975
26	1.137	1.079	1.003	0.871	1.137	1.085	0.947	1.028	1.156	1.089	1.036	1.023	0.953	0.891	0.989	1.197	1.259	1.353	1.494	1.241	1.425	1.021	1.096	1.175	0.953	1.009	1.046
27	1.194	1.123	1.047	0.917	1.272	1.105	0.974	1.069	1.198	1.173	1.141	1.074	0.974	0.957	1.069	1.266	1.308	1.383	1.592	1.285	1.394	1.05	1.154	1.252	1.034	1.106	1.13
28	1.255	1.194	1.131	0.925	1.173	1.142	1.016	1.13	1.294	1.203	1.17	1.168	1.04	1.028	1.127	1.348	1.341	1.474	1.61	1.345	1.463	1.123	1.209	1.28	1.097	1.135	1.185
29	1.321	1.234	1.184	0.966	1.304	1.177	1.062	1.192	1.369	1.267	1.22	1.212	1.074	1.081	1.203	1.381	1.382	1.519	1.664	1.404	1.509	1.198	1.267	1.355	1.138	1.22	1.249
30	1.424	1.272	1.183	0.997	1.396	1.251	1.097	1.211	1.412	1.29	1.274	1.243	1.099	1.122	1.252	1.451	1.448	1.579	1.69	1.454	1.573	1.246	1.295	1.417	1.186	1.257	1.303
31	1.48	1.356	1.239	1.052	1.474	1.307	1.167	1.288	1.405	1.341	1.323	1.317	1.168	1.151	1.318	1.598	1.491	1.647	1.936	1.527	1.62	1.404	1.355	1.447	1.26	1.272	1.34
32	1.521	1.407	1.309	1.09	1.495	1.405	1.206	1.328	1.526	1.398	1.365	1.362	1.197	1.214	1.371	1.67	1.539	1.709	1.905	1.593	1.636	1.452	1.45	1.483	1.315	1.383	1.456
33	1.572	1.445	1.325	1.164	1.567	1.397	1.244	1.407	1.52	1.472	1.417	1.456	1.251	1.269	1.423	1.653	1.578	1.82	1.996	1.685	1.684	1.464	1.492	1.542	1.361	1.456	1.49
34	1.578	1.478	1.37	1.209	1.609	1.373	1.327	1.427	1.593	1.522	1.451	1.566	1.279	1.304	1.468	1.669	1.747	1.989	2.082	1.691	1.772	1.522	1.58	1.624	1.398	1.475	1.537
35	1.755	1.561	1.418	1.277	1.729	1.502	1.38	1.469	1.621	1.564	1.507	1.563	1.324	1.351	1.583	1.736	1.781	2.189	2.186	1.764	1.849	1.581	1.612	1.729	1.512	1.539	1.725
36	1.725	1.61	1.46	1.327	1.903	1.519	1.515	1.54	1.683	1.623	1.678	1.595	1.392	1.408	1.719	1.802	1.788	2.27	2.137	1.958	2.003	1.577	1.74	1.694	1.519	1.672	1.631

## Sheet: C
time (h)	SBW25			Δ6072			Δ3500			Δ2414			Δ2583			Δ5080			Δ0315			Δ3295			Δ1533
0	0.019	0.024	0.017	0.015	0.027	0.017	0.022	0.014	0.034	0.008	0.008	0.004	0.01	0.019	0.019	0.029	0.014	0.015	0.022	0.034	0.021	0.027	0.02	0.018	0.021	0.011	0.033
1	0.018	0.025	0.017	0.015	0.019	0.012	0.014	0.011	0.011	0.014	0.013	0.011	0.017	0.014	0.016	0.025	0.015	0.012	0.019	0.026	0.017	0.022	0.016	0.02	0.018	0.011	0.018
2	0.025	0.03	0.023	0.019	0.025	0.017	0.017	0.014	0.012	0.015	0.017	0.015	0.02	0.019	0.017	0.03	0.017	0.013	0.022	0.029	0.02	0.025	0.022	0.019	0.018	0.012	0.019
3	0.023	0.028	0.022	0.02	0.026	0.017	0.018	0.016	0.012	0.015	0.017	0.019	0.025	0.023	0.022	0.034	0.021	0.014	0.019	0.03	0.018	0.022	0.018	0.017	0.018	0.012	0.019
4	0.026	0.026	0.024	0.022	0.029	0.02	0.019	0.017	0.013	0.014	0.018	0.02	0.029	0.023	0.021	0.038	0.024	0.015	0.018	0.032	0.017	0.021	0.018	0.022	0.018	0.016	0.019
5	0.031	0.028	0.027	0.024	0.03	0.019	0.021	0.02	0.012	0.019	0.018	0.028	0.034	0.03	0.024	0.043	0.026	0.019	0.023	0.034	0.02	0.025	0.02	0.022	0.021	0.017	0.025
6	0.039	0.033	0.033	0.028	0.035	0.02	0.025	0.025	0.014	0.016	0.021	0.033	0.043	0.04	0.032	0.048	0.03	0.027	0.026	0.036	0.025	0.029	0.021	0.019	0.022	0.018	0.024
7	0.035	0.035	0.035	0.023	0.029	0.023	0.03	0.024	0.013	0.015	0.023	0.036	0.045	0.043	0.039	0.044	0.034	0.022	0.021	0.033	0.018	0.03	0.018	0.014	0.025	0.016	0.024
8	0.043	0.049	0.033	0.027	0.032	0.026	0.033	0.025	0.018	0.024	0.036	0.034	0.055	0.051	0.055	0.054	0.046	0.026	0.028	0.039	0.029	0.037	0.022	0.017	0.023	0.026	0.019
9	0.044	0.06	0.029	0.03	0.023	0.021	0.038	0.021	0.021	0.039	0.037	0.036	0.056	0.039	0.065	0.052	0.056	0.026	0.022	0.035	0.022	0.05	0.028	0.018	0.022	0.024	0.024
10	0.048	0.06	0.027	0.031	0.023	0.023	0.03	0.023	0.018	0.05	0.035	0.03	0.041	0.033	0.057	0.047	0.063	0.029	0.035	0.029	0.022	0.039	0.022	0.021	0.021	0.022	0.033
11	0.042	0.059	0.031	0.048	0.031	0.033	0.036	0.034	0.024	0.05	0.031	0.035	0.049	0.055	0.06	0.049	0.05	0.029	0.035	0.028	0.02	0.028	0.026	0.027	0.026	0.026	0.047
12	0.05	0.086	0.055	0.057	0.048	0.043	0.054	0.048	0.031	0.076	0.036	0.055	0.053	0.063	0.054	0.051	0.055	0.062	0.034	0.035	0.031	0.03	0.036	0.056	0.046	0.034	0.067
13	0.049	0.094	0.072	0.062	0.059	0.061	0.043	0.058	0.046	0.08	0.047	0.058	0.086	0.077	0.054	0.063	0.072	0.057	0.039	0.053	0.039	0.036	0.051	0.087	0.06	0.048	0.099
14	0.071	0.091	0.088	0.077	0.082	0.079	0.073	0.082	0.055	0.081	0.072	0.082	0.106	0.101	0.07	0.089	0.092	0.078	0.064	0.07	0.042	0.068	0.075	0.116	0.07	0.083	0.129
15	0.086	0.115	0.12	0.096	0.105	0.1	0.075	0.106	0.076	0.106	0.087	0.106	0.137	0.123	0.108	0.115	0.127	0.104	0.096	0.086	0.074	0.073	0.078	0.159	0.094	0.121	0.173
16	0.107	0.154	0.159	0.137	0.146	0.136	0.102	0.141	0.103	0.138	0.108	0.134	0.174	0.159	0.134	0.151	0.171	0.137	0.126	0.111	0.087	0.103	0.108	0.21	0.134	0.159	0.219
17	0.15	0.201	0.204	0.185	0.207	0.182	0.145	0.185	0.146	0.183	0.146	0.178	0.215	0.206	0.17	0.197	0.219	0.183	0.165	0.149	0.131	0.134	0.15	0.253	0.195	0.202	0.255
18	0.188	0.235	0.241	0.225	0.284	0.218	0.185	0.219	0.186	0.224	0.181	0.221	0.245	0.245	0.212	0.233	0.258	0.218	0.204	0.196	0.175	0.173	0.2	0.296	0.255	0.237	0.285
19	0.225	0.269	0.273	0.26	0.353	0.252	0.218	0.254	0.223	0.262	0.215	0.259	0.27	0.278	0.246	0.267	0.288	0.252	0.236	0.24	0.215	0.209	0.25	0.325	0.297	0.261	0.301
20	0.254	0.303	0.302	0.285	0.389	0.281	0.244	0.29	0.25	0.301	0.245	0.289	0.288	0.307	0.27	0.289	0.305	0.281	0.262	0.277	0.249	0.237	0.289	0.346	0.333	0.276	0.311
21	0.278	0.329	0.329	0.313	0.42	0.307	0.261	0.322	0.277	0.335	0.266	0.316	0.307	0.333	0.289	0.311	0.328	0.304	0.283	0.31	0.275	0.261	0.326	0.372	0.372	0.288	0.316
22	0.307	0.353	0.352	0.337	0.41	0.324	0.291	0.336	0.312	0.362	0.292	0.338	0.334	0.351	0.317	0.343	0.355	0.328	0.299	0.329	0.287	0.281	0.348	0.405	0.39	0.306	0.333
23	0.343	0.377	0.37	0.351	0.444	0.344	0.32	0.353	0.339	0.387	0.32	0.351	0.352	0.369	0.334	0.366	0.376	0.354	0.313	0.353	0.312	0.297	0.367	0.414	0.403	0.329	0.349
24	0.369	0.395	0.38	0.364	0.459	0.361	0.334	0.36	0.353	0.4	0.333	0.363	0.36	0.381	0.345	0.371	0.391	0.369	0.339	0.377	0.328	0.319	0.386	0.421	0.419	0.339	0.349
25	0.39	0.405	0.386	0.38	0.475	0.369	0.349	0.372	0.369	0.413	0.345	0.369	0.376	0.38	0.362	0.379	0.417	0.379	0.359	0.384	0.34	0.337	0.4	0.43	0.43	0.355	0.358
26	0.408	0.418	0.394	0.381	0.488	0.378	0.361	0.384	0.379	0.424	0.353	0.364	0.379	0.408	0.365	0.38	0.421	0.391	0.374	0.401	0.354	0.347	0.411	0.426	0.435	0.363	0.374
27	0.416	0.423	0.397	0.386	0.504	0.381	0.362	0.391	0.375	0.431	0.359	0.36	0.381	0.418	0.37	0.379	0.415	0.391	0.39	0.415	0.362	0.358	0.415	0.43	0.443	0.367	0.375
28	0.419	0.427	0.397	0.394	0.503	0.386	0.364	0.397	0.383	0.433	0.359	0.363	0.382	0.429	0.376	0.383	0.438	0.389	0.395	0.416	0.372	0.369	0.419	0.435	0.451	0.371	0.373
29	0.421	0.427	0.395	0.391	0.517	0.385	0.367	0.397	0.384	0.431	0.358	0.362	0.378	0.435	0.378	0.381	0.431	0.391	0.397	0.417	0.372	0.376	0.42	0.434	0.46	0.373	0.378
30	0.428	0.428	0.395	0.384	0.507	0.384	0.37	0.407	0.396	0.434	0.362	0.352	0.379	0.44	0.378	0.387	0.433	0.4	0.4	0.424	0.372	0.38	0.421	0.432	0.457	0.363	0.368
31	0.426	0.427	0.399	0.387	0.512	0.383	0.369	0.407	0.391	0.432	0.359	0.353	0.375	0.44	0.376	0.389	0.435	0.395	0.408	0.43	0.37	0.388	0.421	0.44	0.461	0.351	0.35
32	0.424	0.429	0.405	0.395	0.515	0.386	0.367	0.404	0.399	0.431	0.354	0.363	0.378	0.443	0.374	0.383	0.434	0.392	0.416	0.437	0.371	0.39	0.422	0.445	0.469	0.335	0.326
33	0.42	0.429	0.413	0.396	0.508	0.385	0.366	0.417	0.393	0.427	0.353	0.368	0.382	0.419	0.378	0.38	0.431	0.393	0.418	0.439	0.366	0.382	0.413	0.434	0.465	0.331	0.318
34	0.419	0.431	0.408	0.384	0.501	0.388	0.37	0.428	0.395	0.43	0.359	0.363	0.391	0.406	0.387	0.372	0.428	0.396	0.416	0.434	0.365	0.373	0.417	0.428	0.465	0.328	0.315
35	0.416	0.425	0.398	0.386	0.494	0.383	0.373	0.427	0.402	0.43	0.351	0.365	0.389	0.397	0.385	0.377	0.43	0.391	0.399	0.424	0.368	0.369	0.417	0.423	0.474	0.319	0.31
36	0.422	0.415	0.395	0.376	0.499	0.378	0.375	0.428	0.399	0.432	0.353	0.353	0.376	0.39	0.376	0.375	0.416	0.39	0.392	0.422	0.378	0.359	0.415	0.414	0.464	0.317	0.3

## Sheet: D
time (h)	SBW25			Δ6072			Δ3500			Δ2414			Δ2583			Δ5080			Δ0315			Δ3295			Δ1533
0	0.14	0.022	0.038	0.158	0.057	0.065	0.026	0.055	0.029	0.289	0.096	0.041	0.038	0.056	0.046	0.036	0.015	0.013	0.039	0.045	0.053	0.126	0.04	0.01	0.07	0.032	0.056
1	0.141	0.032	0.038	0.142	0.065	0.064	0.031	0.045	0.045	0.274	0.098	0.054	0.056	0.059	0.062	0.041	0.025	0.03	0.041	0.05	0.059	0.107	0.049	0.018	0.075	0.041	0.058
2	0.123	0.038	0.042	0.135	0.061	0.063	0.029	0.05	0.028	0.264	0.091	0.099	0.054	0.055	0.056	0.047	0.026	0.033	0.034	0.044	0.048	0.091	0.035	0.024	0.07	0.055	0.06
3	0.15	0.065	0.05	0.152	0.089	0.074	0.065	0.056	0.063	0.279	0.104	0.077	0.078	0.072	0.078	0.066	0.055	0.058	0.042	0.062	0.056	0.106	0.048	0.025	0.079	0.055	0.063
4	0.174	0.07	0.069	0.15	0.083	0.086	0.062	0.073	0.064	0.284	0.114	0.077	0.082	0.075	0.092	0.066	0.055	0.057	0.06	0.062	0.06	0.115	0.061	0.043	0.091	0.064	0.078
5	0.195	0.077	0.08	0.166	0.093	0.095	0.078	0.084	0.074	0.309	0.141	0.1	0.098	0.095	0.11	0.083	0.066	0.068	0.065	0.081	0.085	0.135	0.081	0.064	0.103	0.077	0.092
6	0.202	0.093	0.093	0.178	0.103	0.113	0.088	0.1	0.092	0.335	0.167	0.119	0.114	0.112	0.124	0.105	0.084	0.088	0.084	0.095	0.106	0.145	0.1	0.076	0.122	0.088	0.115
7	0.224	0.114	0.115	0.201	0.125	0.139	0.119	0.122	0.127	0.357	0.192	0.146	0.132	0.129	0.144	0.126	0.108	0.108	0.097	0.113	0.126	0.166	0.123	0.099	0.147	0.109	0.135
8	0.255	0.136	0.138	0.228	0.146	0.17	0.149	0.153	0.159	0.386	0.23	0.176	0.164	0.16	0.181	0.146	0.131	0.124	0.113	0.131	0.152	0.195	0.152	0.118	0.178	0.13	0.161
9	0.315	0.169	0.172	0.263	0.185	0.204	0.191	0.194	0.204	0.449	0.284	0.224	0.223	0.209	0.245	0.191	0.176	0.166	0.136	0.157	0.2	0.244	0.198	0.149	0.238	0.175	0.212
10	0.388	0.222	0.224	0.296	0.227	0.271	0.249	0.239	0.267	0.512	0.326	0.273	0.271	0.257	0.306	0.262	0.257	0.229	0.18	0.209	0.258	0.298	0.248	0.205	0.298	0.228	0.263
11	0.423	0.271	0.262	0.348	0.275	0.336	0.284	0.283	0.319	0.546	0.365	0.302	0.307	0.289	0.339	0.315	0.316	0.276	0.235	0.257	0.299	0.337	0.289	0.261	0.336	0.273	0.295
12	0.442	0.289	0.292	0.399	0.308	0.366	0.307	0.307	0.356	0.581	0.392	0.321	0.33	0.313	0.362	0.344	0.358	0.313	0.277	0.291	0.326	0.366	0.318	0.299	0.365	0.301	0.321
13	0.461	0.311	0.314	0.423	0.316	0.379	0.322	0.326	0.377	0.606	0.412	0.343	0.346	0.332	0.384	0.373	0.385	0.329	0.299	0.313	0.346	0.386	0.341	0.33	0.396	0.32	0.343
14	0.478	0.321	0.324	0.437	0.327	0.391	0.331	0.332	0.392	0.621	0.434	0.358	0.36	0.353	0.402	0.39	0.409	0.342	0.318	0.33	0.364	0.403	0.357	0.35	0.416	0.333	0.358
15	0.488	0.334	0.333	0.449	0.333	0.397	0.336	0.336	0.397	0.634	0.442	0.366	0.363	0.36	0.406	0.402	0.421	0.353	0.327	0.334	0.373	0.417	0.368	0.362	0.428	0.342	0.364
16	0.493	0.347	0.335	0.462	0.338	0.394	0.334	0.337	0.397	0.641	0.442	0.373	0.364	0.365	0.403	0.403	0.42	0.355	0.329	0.342	0.378	0.424	0.377	0.371	0.434	0.348	0.368
17	0.494	0.346	0.336	0.47	0.336	0.39	0.334	0.331	0.404	0.641	0.447	0.377	0.36	0.365	0.395	0.399	0.417	0.356	0.338	0.337	0.376	0.422	0.373	0.375	0.436	0.349	0.372
18	0.496	0.355	0.328	0.473	0.34	0.397	0.334	0.34	0.407	0.634	0.45	0.372	0.356	0.36	0.389	0.393	0.415	0.353	0.342	0.335	0.377	0.427	0.374	0.372	0.435	0.35	0.369
19	0.478	0.344	0.334	0.475	0.349	0.398	0.341	0.34	0.408	0.635	0.444	0.371	0.347	0.347	0.394	0.39	0.416	0.347	0.335	0.335	0.385	0.434	0.383	0.373	0.437	0.346	0.369
20	0.471	0.346	0.339	0.473	0.357	0.397	0.34	0.345	0.412	0.65	0.449	0.382	0.369	0.356	0.397	0.393	0.419	0.344	0.327	0.338	0.395	0.438	0.394	0.376	0.438	0.352	0.369
21	0.496	0.343	0.342	0.486	0.355	0.401	0.357	0.348	0.426	0.651	0.444	0.393	0.362	0.353	0.399	0.397	0.422	0.351	0.324	0.348	0.408	0.444	0.406	0.395	0.442	0.358	0.375
22	0.519	0.351	0.348	0.486	0.373	0.403	0.364	0.361	0.439	0.647	0.464	0.4	0.404	0.36	0.405	0.397	0.424	0.361	0.327	0.348	0.411	0.45	0.409	0.392	0.45	0.365	0.385
23	0.485	0.361	0.359	0.497	0.385	0.41	0.372	0.368	0.44	0.642	0.458	0.397	0.38	0.365	0.402	0.396	0.423	0.366	0.33	0.353	0.418	0.454	0.417	0.401	0.45	0.368	0.392
24	0.469	0.376	0.373	0.494	0.391	0.41	0.387	0.373	0.435	0.636	0.454	0.388	0.384	0.35	0.408	0.402	0.419	0.364	0.339	0.355	0.422	0.459	0.418	0.394	0.45	0.37	0.397
25	0.489	0.386	0.377	0.506	0.402	0.415	0.398	0.379	0.444	0.616	0.471	0.394	0.37	0.352	0.404	0.398	0.427	0.369	0.348	0.357	0.423	0.463	0.416	0.4	0.462	0.374	0.408
26	0.498	0.378	0.372	0.498	0.401	0.414	0.375	0.381	0.447	0.626	0.472	0.381	0.361	0.362	0.399	0.398	0.419	0.367	0.354	0.359	0.428	0.459	0.42	0.396	0.463	0.375	0.414
27	0.498	0.375	0.367	0.489	0.396	0.414	0.365	0.378	0.439	0.617	0.467	0.376	0.372	0.372	0.409	0.393	0.42	0.36	0.354	0.363	0.426	0.46	0.413	0.39	0.455	0.374	0.413
28	0.488	0.37	0.372	0.488	0.389	0.414	0.372	0.378	0.425	0.618	0.472	0.376	0.381	0.371	0.413	0.393	0.443	0.37	0.357	0.363	0.423	0.458	0.413	0.385	0.452	0.372	0.417
29	0.477	0.38	0.369	0.483	0.393	0.417	0.391	0.382	0.429	0.622	0.475	0.379	0.388	0.375	0.407	0.407	0.425	0.367	0.354	0.367	0.419	0.454	0.421	0.387	0.475	0.377	0.419
30	0.472	0.39	0.375	0.483	0.396	0.421	0.392	0.388	0.435	0.62	0.462	0.381	0.392	0.367	0.409	0.41	0.421	0.363	0.359	0.373	0.421	0.452	0.437	0.39	0.475	0.382	0.418
31	0.459	0.398	0.379	0.484	0.407	0.423	0.377	0.401	0.422	0.608	0.472	0.387	0.388	0.37	0.413	0.419	0.412	0.378	0.367	0.379	0.422	0.45	0.43	0.405	0.458	0.388	0.419
32	0.475	0.389	0.376	0.479	0.411	0.428	0.39	0.407	0.418	0.602	0.473	0.384	0.393	0.377	0.415	0.422	0.403	0.376	0.356	0.379	0.451	0.453	0.428	0.418	0.442	0.392	0.42
33	0.477	0.397	0.38	0.478	0.414	0.427	0.396	0.401	0.414	0.599	0.475	0.391	0.391	0.375	0.431	0.433	0.4	0.385	0.382	0.385	0.442	0.453	0.424	0.414	0.449	0.389	0.441
34	0.471	0.406	0.379	0.476	0.44	0.438	0.394	0.4	0.412	0.593	0.474	0.392	0.391	0.384	0.425	0.41	0.381	0.38	0.382	0.383	0.428	0.443	0.412	0.4	0.435	0.391	0.431
35	0.466	0.41	0.38	0.471	0.404	0.413	0.386	0.41	0.395	0.588	0.475	0.396	0.395	0.378	0.414	0.397	0.378	0.395	0.381	0.384	0.429	0.456	0.416	0.394	0.422	0.398	0.421
36	0.472	0.398	0.391	0.467	0.4	0.433	0.4	0.439	0.382	0.582	0.444	0.401	0.394	0.406	0.41	0.397	0.369	0.385	0.373	0.384	0.417	0.455	0.398	0.396	0.412	0.397	0.414

## Sheet: E
time (h)	SBW25			Δ6072			Δ3500			Δ2414			Δ2583			Δ5080			Δ0315			Δ3295			Δ1533
0	0.016	0.011	0.016	0.018	0.01	0.01	0.012	0.017	0.011	0.045	0.034	0.032	0.046	0.051	0.051	0.044	0.045	0.048	0.014	0.017	0.02	0.022	0.038	0.051*	0.047	0.04	0.035
1	0.016	0.015	0.02	0.02	0.014	0.014	0.016	0.023	0.015	0.056	0.043	0.037	0.033	0.039	0.034	0.064*	0.073*	0.044	0.018	0.022	0.027	0.028	0.032	0.041	0.047	0.041	0.039
2	0.022	0.016	0.024	0.017	0.014	0.014	0.017	0.022	0.015	0.065	0.055	0.048	0.035	0.045	0.04	0.038	0.046	0.043	0.021	0.027	0.029	0.031	0.034	0.043	0.053	0.046	0.045
3	0.027	0.023	0.028	0.022	0.014	0.019	0.022	0.026	0.017	0.072	0.063	0.056	0.041	0.057	0.049	0.041	0.05	0.048	0.024	0.033	0.037	0.037	0.039	0.052	0.061	0.053	0.055
4	0.028	0.029	0.037	0.024	0.017	0.018	0.025	0.033	0.023	0.082	0.069	0.063	0.053	0.065	0.057	0.041	0.058	0.053	0.028	0.047	0.043	0.049	0.046	0.058	0.069	0.061	0.063
5	0.043	0.033	0.048	0.027	0.022	0.023	0.033	0.038	0.028	0.091	0.083	0.072	0.06	0.074	0.062	0.052	0.068	0.063	0.044	0.052	0.049	0.056	0.053	0.068	0.076	0.069	0.071
6	0.053	0.04	0.052	0.026	0.023	0.027	0.044	0.045	0.039	0.116	0.106	0.091	0.066	0.09	0.07	0.059	0.077	0.069	0.052	0.059	0.056	0.063	0.062	0.08	0.092	0.087	0.086
7	0.057	0.049	0.059	0.034	0.027	0.028	0.052	0.053	0.045	0.152	0.13	0.115	0.081	0.094	0.082	0.063	0.091	0.083	0.056	0.076	0.069	0.078	0.076	0.091	0.097	0.093	0.097
8	0.065	0.061	0.071	0.042	0.033	0.034	0.062	0.063	0.054	0.147	0.138	0.127	0.092	0.108	0.09	0.07	0.105	0.097	0.06	0.09	0.088	0.087	0.081	0.108	0.122	0.114	0.111
9	0.076	0.074	0.086	0.046	0.038	0.04	0.073	0.079	0.067	0.203	0.18	0.159	0.126	0.128	0.108	0.082	0.116	0.11	0.076	0.089	0.113	0.113	0.103	0.137	0.144	0.143	0.133
10	0.097	0.089	0.102	0.054	0.045	0.047	0.089	0.097	0.08	0.241	0.227	0.201	0.158	0.152	0.132	0.106	0.144	0.14	0.089	0.134	0.136	0.152	0.145	0.174	0.176	0.182	0.165
11	0.119	0.135	0.127	0.061	0.051	0.052	0.129	0.13	0.099	0.288	0.272	0.239	0.173	0.203	0.173	0.092	0.166	0.17	0.106	0.154	0.156	0.176	0.161	0.178	0.203	0.196	0.212
12	0.146	0.15	0.18	0.07	0.056	0.059	0.125	0.156	0.105	0.343	0.342	0.301	0.217	0.242	0.214	0.122	0.181	0.181	0.14	0.21	0.182	0.192	0.172	0.233	0.27	0.258	0.254
13	0.199	0.157	0.213	0.082	0.067	0.072	0.157	0.162	0.141	0.414	0.408	0.364	0.274	0.298	0.26	0.139	0.234	0.222	0.191	0.257	0.232	0.264	0.225	0.286	0.302	0.275	0.304
14	0.238	0.214	0.253	0.093	0.08	0.083	0.202	0.235	0.189	0.448	0.449	0.424	0.333	0.362	0.309	0.194	0.284	0.261	0.231	0.309	0.265	0.294	0.257	0.348	0.354	0.351	0.37
15	0.279	0.245	0.308	0.096	0.091	0.093	0.244	0.272	0.232	0.5	0.503	0.471	0.401	0.417	0.374	0.227	0.343	0.323	0.267	0.366	0.305	0.341	0.303	0.385	0.39	0.393	0.379
16	0.335	0.289	0.354	0.112	0.098	0.105	0.293	0.316	0.284	0.531	0.536	0.509	0.449	0.465	0.425	0.297	0.389	0.373	0.321	0.417	0.352	0.391	0.33	0.423	0.419	0.42	0.403
17	0.391	0.349	0.388	0.124	0.11	0.118	0.345	0.364	0.317	0.555	0.56	0.537	0.494	0.501	0.464	0.325	0.429	0.398	0.361	0.459	0.384	0.41	0.376	0.456	0.469	0.456	0.441
18	0.442	0.397	0.427	0.136	0.106	0.12	0.398	0.399	0.366	0.583	0.577	0.547	0.516	0.525	0.494	0.385	0.468	0.436	0.407	0.475	0.42	0.436	0.414	0.485	0.502	0.484	0.48
19	0.476	0.426	0.463	0.156	0.133	0.137	0.43	0.446	0.401	0.596	0.588	0.559	0.531	0.549	0.524	0.43	0.499	0.496	0.449	0.504	0.448	0.465	0.45	0.511	0.533	0.517	0.507
20	0.498	0.455	0.488	0.207	0.17	0.184	0.454	0.499	0.479	0.619	0.61	0.584	0.552	0.568	0.539	0.461	0.525	0.54	0.469	0.526	0.474	0.486	0.467	0.531	0.545	0.536	0.543
21	0.525	0.49	0.513	0.229	0.2	0.205	0.486	0.494	0.47	0.642	0.626	0.601	0.572	0.594	0.564	0.486	0.549	0.54	0.5	0.548	0.497	0.502	0.504	0.557	0.568	0.559	0.562
22	0.55	0.507	0.532	0.259	0.23	0.235	0.511	0.512	0.489	0.649	0.638	0.616	0.588	0.608	0.589	0.516	0.574	0.569	0.524	0.563	0.521	0.513	0.532	0.576	0.588	0.591	0.583
23	0.566	0.518	0.554	0.285	0.259	0.264	0.531	0.563	0.508	0.657	0.647	0.628	0.605	0.625	0.606	0.542	0.605	0.597	0.548	0.582	0.534	0.534	0.55	0.587	0.596	0.604	0.595
24	0.586	0.532	0.567	0.316	0.286	0.292	0.547	0.57	0.537	0.658	0.65	0.638	0.616	0.637	0.61	0.558	0.613	0.617	0.562	0.591	0.55	0.559	0.572	0.605	0.617	0.629	0.608
25	0.599	0.56	0.58	0.354	0.319	0.327	0.567	0.568	0.536	0.665	0.66	0.648	0.629	0.645	0.61	0.585	0.623	0.626	0.58	0.603	0.57	0.58	0.589	0.628	0.624	0.617	0.613
26	0.611	0.571	0.591	0.386	0.352	0.358	0.589	0.59	0.553	0.668	0.665	0.659	0.637	0.653	0.625	0.596	0.646	0.637	0.585	0.612	0.578	0.584	0.595	0.624	0.629	0.626	0.615
27	0.615	0.576	0.603	0.411	0.38	0.383	0.6	0.59	0.569	0.67	0.667	0.666	0.641	0.657	0.63	0.614	0.657	0.646	0.604	0.621	0.583	0.59	0.603	0.625	0.633	0.632	0.619
28	0.62	0.587	0.609	0.433	0.398	0.408	0.609	0.602	0.57	0.67	0.677	0.675	0.651	0.658	0.641	0.621	0.661	0.647	0.612	0.631	0.593	0.606	0.606	0.635	0.636	0.652	0.637
29	0.629	0.594	0.607	0.452	0.42	0.427	0.61	0.611	0.577	0.662	0.669	0.685	0.651	0.661	0.65	0.628	0.664	0.649	0.612	0.643	0.602	0.613	0.618	0.637	0.639	0.641	0.632
30	0.628	0.605	0.608	0.472	0.443	0.45	0.611	0.615	0.589	0.668	0.667	0.679	0.659	0.665	0.652	0.634	0.661	0.645	0.62	0.651	0.615	0.625	0.63	0.65	0.646	0.653	0.64
31	0.63	0.609	0.612	0.496	0.475	0.479	0.621	0.622	0.604	0.656	0.653	0.678	0.654	0.652	0.646	0.639	0.669	0.665	0.625	0.649	0.621	0.63	0.631	0.647	0.647	0.654	0.648
32	0.622	0.607	0.606	0.511	0.492	0.497	0.619	0.625	0.607	0.655	0.652	0.671	0.65	0.654	0.643	0.643	0.662	0.66	0.623	0.652	0.618	0.634	0.647	0.64	0.633	0.656	0.649
33	0.616	0.61	0.604	0.521	0.505	0.513	0.611	0.626	0.616	0.648	0.645	0.668	0.646	0.639	0.629	0.627	0.666	0.654	0.62	0.639	0.617	0.627	0.635	0.637	0.632	0.656	0.648
34	0.615	0.6	0.6	0.532	0.519	0.524	0.607	0.628	0.619	0.644	0.653	0.667	0.637	0.628	0.628	0.621	0.659	0.654	0.617	0.635	0.612	0.634	0.636	0.635	0.632	0.653	0.648
35	0.614	0.607	0.601	0.547	0.538	0.554	0.602	0.621	0.61	0.64	0.662	0.66	0.637	0.619	0.615	0.61	0.655	0.66	0.617	0.632	0.617	0.626	0.638	0.634	0.62	0.66	0.647
36	0.594	0.605	0.583	0.556	0.55	0.562	0.598	0.619	0.62	0.637	0.655	0.65	0.629	0.616	0.609	0.61	0.65	0.65	0.611	0.621	0.614	0.619	0.636	0.623	0.614	0.653	0.644

## Sheet: F
time (h)	SBW25			Δ6072			Δ3500			Δ2414			Δ2583			Δ5080			Δ0315			Δ3295			Δ1533
0	0.011	0.012	0.019	0.014	0.011	0.001	0.005	0.07	0.033	0.018	0.01	0.015	0.004	0.022	0.028	0.023	0.015	0.002	0.027	0.05	0.011	0.019	0.013	0.009	0.029	0.025	0.001
1	0.01	0.011	0.01	0.019	0.013	0.009	0.002	0.072	0.04	0.022	0.01	0.014	0.004	0.014	0.015	0.033	0.015	0	0.032	0.052	0.019	0.022	0.011	0.012	0.038	0.041	0.044
2	0.005	0.02	0.02	0.023	0.022	0.013	0.021	0.073	0.043	0.014	0.009	0.011	0.032	0.02	0.022	0.034	0.01	0.004	0.019	0.049	0.02	0.017	0.011	0.07	0.03	0.096	0.085
3	0.014	0.046	0.054	0.026	0.028	0.022	0.027	0.076	0.073	0.024	0.019	0.017	0.112	0.044	0.065	0.044	0.009	0.029	0.028	0.068	0.029	0.027	0.026	0.109	0.023	0.173	0.165
4	0.03	0.087	0.141	0.03	0.035	0.03	0.076	0.107	0.105	0.05	0.044	0.041	0.265	0.191	0.214	0.072	0.029	0.039	0.061	0.102	0.071	0.076	0.049	0.198	0.049	0.279	0.258
5	0.06	0.243	0.243	0.034	0.042	0.037	0.153	0.192	0.163	0.077	0.099	0.059	0.371	0.325	0.32	0.091	0.114	0.117	0.144	0.177	0.122	0.127	0.115	0.266	0.106	0.351	0.335
6	0.194	0.358	0.342	0.039	0.047	0.044	0.233	0.225	0.222	0.233	0.253	0.219	0.46	0.409	0.412	0.187	0.142	0.14	0.276	0.255	0.241	0.222	0.222	0.343	0.19	0.404	0.404
7	0.331	0.446	0.43	0.043	0.054	0.05	0.295	0.322	0.317	0.361	0.361	0.336	0.497	0.453	0.44	0.278	0.203	0.259	0.387	0.349	0.319	0.334	0.318	0.382	0.289	0.437	0.454
8	0.427	0.476	0.459	0.048	0.06	0.052	0.354	0.391	0.387	0.437	0.446	0.378	0.522	0.483	0.463	0.377	0.252	0.293	0.458	0.414	0.39	0.425	0.39	0.408	0.37	0.462	0.485
9	0.498	0.507	0.495	0.048	0.062	0.052	0.394	0.451	0.452	0.495	0.471	0.437	0.526	0.503	0.474	0.431	0.32	0.348	0.508	0.466	0.454	0.46	0.429	0.425	0.427	0.479	0.519
10	0.522	0.522	0.528	0.053	0.065	0.058	0.447	0.489	0.489	0.523	0.475	0.47	0.538	0.515	0.485	0.478	0.37	0.379	0.536	0.498	0.49	0.488	0.478	0.445	0.48	0.508	0.543
11	0.528	0.545	0.548	0.059	0.068	0.061	0.462	0.516	0.515	0.543	0.493	0.503	0.576	0.527	0.497	0.51	0.423	0.417	0.55	0.519	0.524	0.511	0.511	0.46	0.511	0.524	0.555
12	0.547	0.561	0.561	0.059	0.073	0.062	0.501	0.54	0.547	0.562	0.495	0.515	0.575	0.542	0.51	0.545	0.425	0.485	0.552	0.533	0.546	0.523	0.538	0.472	0.549	0.562	0.588
13	0.563	0.588	0.568	0.062	0.071	0.063	0.528	0.588	0.588	0.578	0.52	0.532	0.588	0.569	0.566	0.565	0.487	0.521	0.575	0.549	0.566	0.531	0.562	0.488	0.57	0.576	0.622
14	0.593	0.64	0.633	0.068	0.074	0.068	0.541	0.614	0.604	0.604	0.569	0.57	0.605	0.575	0.586	0.568	0.534	0.539	0.582	0.567	0.579	0.541	0.584	0.512	0.593	0.582	0.625
15	0.634	0.643	0.652	0.074	0.082	0.078	0.57	0.65	0.634	0.611	0.604	0.599	0.612	0.6	0.594	0.589	0.527	0.562	0.605	0.579	0.591	0.561	0.625	0.515	0.614	0.594	0.625
16	0.633	0.647	0.657	0.083	0.094	0.098	0.625	0.667	0.677	0.607	0.621	0.607	0.62	0.608	0.618	0.623	0.537	0.593	0.648	0.609	0.62	0.591	0.649	0.529	0.643	0.59	0.627
17	0.632	0.659	0.673	0.091	0.104	0.109	0.617	0.695	0.674	0.626	0.611	0.625	0.628	0.595	0.604	0.624	0.544	0.608	0.64	0.638	0.642	0.592	0.662	0.532	0.649	0.586	0.637
18	0.633	0.649	0.661	0.093	0.121	0.125	0.62	0.718	0.699	0.626	0.607	0.635	0.636	0.602	0.615	0.642	0.585	0.634	0.661	0.636	0.648	0.607	0.666	0.547	0.658	0.613	0.657
19	0.632	0.655	0.666	0.087	0.138	0.131	0.633	0.743	0.722	0.629	0.642	0.623	0.648	0.608	0.618	0.627	0.61	0.658	0.668	0.637	0.64	0.631	0.669	0.544	0.666	0.6	0.658
20	0.642	0.654	0.669	0.089	0.159	0.142	0.63	0.751	0.721	0.632	0.627	0.643	0.655	0.615	0.628	0.638	0.613	0.659	0.667	0.639	0.659	0.62	0.681	0.543	0.693	0.601	0.659
21	0.653	0.659	0.667	0.094	0.181	0.149	0.64	0.754	0.73	0.651	0.638	0.635	0.663	0.615	0.627	0.639	0.618	0.643	0.655	0.635	0.66	0.632	0.678	0.557	0.701	0.609	0.668
22	0.664	0.665	0.673	0.11	0.193	0.16	0.668	0.785	0.757	0.636	0.647	0.648	0.662	0.624	0.627	0.643	0.629	0.672	0.658	0.647	0.664	0.632	0.681	0.549	0.697	0.609	0.673
23	0.671	0.664	0.675	0.123	0.217	0.193	0.679	0.786	0.761	0.649	0.653	0.656	0.666	0.617	0.634	0.647	0.642	0.705	0.681	0.647	0.677	0.631	0.702	0.556	0.709	0.615	0.672
24	0.666	0.665	0.683	0.136	0.226	0.196	0.666	0.787	0.775	0.664	0.659	0.66	0.668	0.62	0.635	0.656	0.663	0.69	0.673	0.66	0.673	0.636	0.694	0.552	0.717	0.611	0.676
25	0.685	0.668	0.685	0.161	0.259	0.191	0.683	0.793	0.754	0.634	0.664	0.668	0.673	0.621	0.639	0.662	0.655	0.695	0.655	0.654	0.675	0.634	0.693	0.553	0.716	0.628	0.678
26	0.705	0.668	0.684	0.194	0.276	0.172	0.687	0.816	0.749	0.644	0.666	0.662	0.674	0.624	0.64	0.666	0.662	0.729	0.665	0.667	0.676	0.635	0.693	0.559	0.713	0.633	0.679
27	0.712	0.67	0.686	0.178	0.293	0.181	0.677	0.827	0.769	0.608	0.658	0.662	0.676	0.631	0.642	0.671	0.672	0.731	0.664	0.658	0.672	0.633	0.694	0.559	0.716	0.635	0.681
28	0.714	0.673	0.687	0.189	0.313	0.22	0.676	0.808	0.765	0.561	0.669	0.665	0.678	0.635	0.644	0.676	0.678	0.736	0.663	0.669	0.659	0.635	0.697	0.561	0.72	0.636	0.675
29	0.717	0.673	0.688	0.209	0.323	0.25	0.678	0.834	0.761	0.525	0.67	0.665	0.682	0.638	0.653	0.678	0.674	0.745	0.663	0.661	0.661	0.635	0.695	0.557	0.721	0.636	0.68
30	0.722	0.677	0.687	0.234	0.327	0.272	0.672	0.823	0.766	0.5	0.668	0.649	0.673	0.63	0.649	0.683	0.682	0.755	0.658	0.667	0.664	0.64	0.698	0.563	0.727	0.633	0.678
31	0.728	0.681	0.69	0.209	0.333	0.269	0.674	0.825	0.768	0.481	0.66	0.624	0.673	0.618	0.647	0.691	0.694	0.758	0.659	0.672	0.671	0.637	0.701	0.563	0.722	0.648	0.675
32	0.729	0.683	0.691	0.219	0.335	0.282	0.676	0.845	0.767	0.464	0.64	0.599	0.676	0.613	0.647	0.696	0.697	0.76	0.661	0.67	0.688	0.64	0.701	0.565	0.726	0.644	0.676
33	0.729	0.688	0.695	0.221	0.349	0.288	0.681	0.836	0.769	0.442	0.618	0.574	0.672	0.605	0.641	0.697	0.704	0.767	0.664	0.671	0.689	0.639	0.702	0.564	0.727	0.637	0.675
34	0.732	0.691	0.694	0.23	0.364	0.291	0.685	0.839	0.775	0.426	0.605	0.546	0.67	0.602	0.637	0.699	0.699	0.766	0.668	0.683	0.69	0.646	0.702	0.585	0.735	0.64	0.692
35	0.731	0.689	0.694	0.243	0.376	0.301	0.689	0.839	0.778	0.405	0.597	0.518	0.669	0.613	0.638	0.702	0.71	0.766	0.673	0.677	0.7	0.649	0.7	0.604	0.764	0.657	0.707
36	0.729	0.692	0.692	0.253	0.396	0.305	0.717	0.857	0.777	0.388	0.587	0.496	0.66	0.593	0.62	0.703	0.708	0.754	0.671	0.663	0.697	0.648	0.692	0.606	0.772	0.653	0.714
